# Supplementary material for: Mycobacterium tuberculosis resisters despite HIV exhibit activated T cells and macrophages in their pulmonary alveoli
Source: Research Square preprint supplement (doi:10.21203/rs.3.rs-3889020/v1), 2024-01-31
Supplement: Supplementary file 1 [file 51a885ebbe24f0d598e9a075.xlsx]

## Sheet: Table S3
Supplementary Table 3. Cluster annotations and conserved cluster markers in BAL lymphocyte and AM/DC subpopulations.
			Genes with higher expression in the cluster compared to remaining cells in the subset		Genes with lower expression in the cluster compared to remaining cells in the subset
Subset	Cluster	Annotation	# DEG	DEG	# DEG	DEG	Notes
Lymphocyte	L.0	CD4+ Tissue-resident memory T cell	27	LINC02694,JAML,SLC4A7,THEMIS,DAPK2,CXCR6,RBPJ,CD2,ITGAE,ITGA1,CD96,SOS1,AC013652.1,SLF1,PARP8,FYB1,CAMK4,TBXAS1,KIAA0825,ITGB1,PAG1,MFHAS1,TRERF1,PCNX2,TGFBR2,CCL5,ALOX5AP	0	-	•Positive/high: Tissue-resident markers ITGA1 (CD49a), ITGAE (CD103), CXCR6 •Cell-surf proteins: CD8 low, CD4 high •Transition of gene expression between L.1 and L.4
Lymphocyte	L.1	ALOX5APhigh T cell	8	ALOX5AP,LGALS3,CCL5,SLC35F1,S100A4,CXCR6,HOPX,PLIN2	55	NEAT1,ELMO1,FTX,RABGAP1L,PDE3B,FBXW7,SIK3,AC079793.1,RIPOR2,TBC1D22A,ZEB1,SYNE2,ANKRD44,BCL2,FOXP1,ZFAND3,STAG1,MED13L,TAB2,NFAT5,KMT2C,LRBA,BACH2,CAMK1D,KAT6A,ADK,ASH1L,PRKCH,DENND4A,ARIH1,FBXO11,HIVEP2,JAZF1,PITPNC1,NCOA3,CHST11,LYST,ANKRD17,NFKB1,TRAF3,BTBD9,PICALM,RALGAPA1,GLS,ANK3,BACH1,MAML2,KDM6A,RFX3,ZEB2,KANSL1,KLF12,CDC14A,PRDM2,CHD2	•Cell-surf proteins: similar CD4 and CD8
Lymphocyte	L.2	GZMKhigh CD8+ Cytotoxic T cell (CTL)	53	C1orf21,CD8A,CD8B,GZMK,NKG7,CST7,GZMA,CCL5,GZMM,SAMD3,GZMH,APOBEC3G,SH2D1A,AOAH,HLA-DPB1,LYST,TIGIT,DUSP2,MLLT3,ITM2C,KLRK1,FYN,CCL4,AUTS2,HLA-DRB1,ARAP2,COTL1,CMC1,CD74,TBC1D2B,C12orf75,GZMB,PLAAT4,LYAR,CD3G,ZEB2,HLA-DPA1,CD3D,GGA2,GIMAP4,PRKCH,NFATC2,LITAF,ZBTB38,PYHIN1,AKNA,PPP1R14B,RAB27A,HLA-DRA,PTK2B,SYNE1,TOX,ABLIM1	14	IL7R,SQSTM1,KLRB1,LTB,LINC02694,PLIN2,MFHAS1,ANKRD28,LGALS3,SAMSN1,BACH2,S100A4,XBP1,AKT3	•Positive/high: CD8A/B, NKG7, EOMES, GZMA/B/H/K (GZMK exclusive to this cluster) •Cell-surf proteins: CD8 high, CD4 low
Lymphocyte	L.3	GZMBhigh CD8+ Cytotoxic T cell (CTL)	161	RGS16,ACTB,GZMB,ACTG1,PFN1,SH3BGRL3,IL32,CLIC1,S100A4,S100A6,LGALS1,CKLF,CD52,CORO1A,MYL6,CD3D,NKG7,ALOX5AP,CD2,APOBEC3G,GZMH,TPM4,MYL12A,CFL1,CD63,HOPX,CCL4,PKM,PSME2,HCST,EMP3,RAC2,PRELID1,TYMP,ARPC2,CALR,ENO1,MYL12B,PSMB9,TRAC,PSME1,CAPG,LCP1,GZMA,PSMA7,ARPC1B,GSTP1,CCL5,IL2RG,TNFSF14,COX17,BST2,ID2,PARK7,CCDC107,ARPC3,SOCS1,CTSC,LDHA,EFHD2,PTPN7,PSMB3,IFI27L2,NDUFA4,PTTG1,LGALS3,CCND2,LINC018…	43	PPP2R5C,IL7R,CXCR4,CNOT6L,FYN,FOXP1,GAS5,EPB41,PDE3B,TNRC6B,CDC42SE2,SLC35F1,BICDL1,CAMK4,ZFAS1,SNHG29,ARID5B,SMCHD1,RABGAP1L,RIPOR2,ZBTB20,CREBRF,AKT3,CAMK1D,STK38,STAT5B,MLLT3,BACH2,RFX3,TC2N,LINC01619,PITPNC1,TSC22D3,GIMAP7,BACH1,PDCD4,SLC4A7,DLEU2,ADK,ATP2B1,PACS1,CBLB,ELMO1	•Positive/high: TRAC, CD3G, GZMB, GZMH, NKG7, CCL4, CD63, EFHD2 •Mostly cells from 24h libraries. •Cell-surf proteins: CD8 high, CD4 low
Lymphocyte	L.4	CD8+ Tissue-resident memory T cell	149	CD96,ITGA1,PARP8,THEMIS,DAPK2,MBNL1,ITGAE,SYTL2,SOS1,CAMK4,SLFN12L,LINC02694,AOAH,NIBAN1,AC013652.1,CBLB,ARHGAP15,MVB12B,PAG1,ZBTB20,AC022126.1,CHST11,PTPN22,ATXN1,LRBA,PDE3B,PCNX2,RABGAP1L,JAML,MSC-AS1,RORA,DLEU2,AC079793.1,PCNX1,ATP8A1,PTPRJ,CLASP1,DOCK10,INPP5D,TRERF1,SKAP1,PPP1R16B,ANKRD44,FUT8,PRKCH,FTX,PITPNC1,EML4,DOCK2,SYNE1,STAT4,CELF2,SLC4A7,CMIP,PRKCQ,XYLT1,LINC01871,RORA-AS1,DPYD,GRAP…	1	SLC35F1	•Positive/high: Tissue-resident markers ITGA1 (CD49a), ITGAE (CD103), CXCR6 •Cell-surf proteins: CD8 high, CD4 low
Lymphocyte	L.5	RPS13high CD4+ Naïve T cell	35	RPS13,EEF1B2,CCR7,SELL,KLF2,GIMAP7,IL7R,RPLP0,RPL22,RACK1,EEF1G,GAS5,LEF1,LTB,TCF7,RPL7,ANK3,RPS10,SLC35F1,SNHG6,NOP53,SNHG29,SERINC5,RPL23,GIMAP4,GPR183,GIMAP1,RPL4,FXYD5,GIMAP5,LDHB,ZFAS1,EIF3E,RIPOR2,OCIAD2	67	CCL5,LGALS1,PTPN22,APOBEC3G,CD96,ITGA1,HLA-DRB1,CST7,NKG7,JAML,AOAH,RBPJ,ALOX5AP,GZMB,HOPX,ZEB2,ITGAE,CXCR6,LINC02694,PARP8,S100A4,RUNX3,HLA-DPA1,GZMA,SYTL3,LCP1,ITGAL,CLIC1,NIBAN1,SLFN12L,PPP1R16B,HLA-DPB1,THEMIS,RAB27A,CD74,C12orf75,LINC01871,ANKRD28,ACTN4,STAT4,CD63,LGALS3,FABP5,CMIP,SAMD3,GNG2,SLF1,SKAP1,SOS1,EFHD2,SFMBT2,TANK,ID2,NAA50,HCST,PTPRJ,HLA-DRA,CHST11,SLC4A7,CBLB,SYTL2,CD58,EPS15,P…	•Positive/high: naïve markers TCF7, FHIT, EIF3E, LEF1, CD28, CCR7 (CD197), TSHZ2, SELL (CD62L) •Cell-surf proteins: CD8 low, CD4 high
Lymphocyte	L.6	FAAH2high CD4+ Naïve T cell	88	FAAH2,LEF1,TSHZ2,CCR7,SELL,ANK3,CMTM8,SERINC5,S1PR1,TCF7,GIMAP7,TESPA1,LRRC8D,CD28,KLF2,IL7R,RASA3,RPL23,RIPOR2,ABLIM1,PRKCA,GIMAP4,RPL27A,PDE3B,SESN3,GIMAP1,DGKA,GIMAP5,SYNE2,RPL7,EPB41,P2RY8,LTB,LINC00861,RPS20,RPS17,RPL31,PVT1,HIVEP2,EEF1G,AC016074.2,MAF,GPR183,PABPC1,LDHB,RPL4,THEM4,ADD3,CDC14A,MGAT4A,TMEM123,FKBP5,ETV6,ARHGAP15,IL6ST,CCND3,AC079793.1,SNHG6,EIF3E,LIMS1,CD55,GAS5,FOXP1,CASP8,P…	37	CCL5,LGALS1,APOBEC3G,NKG7,ITGA1,CST7,GZMB,JAML,HOPX,PTPN22,HLA-DRB1,CXCR6,ITGAE,AOAH,CD63,ALOX5AP,RBPJ,LGALS3,CLIC1,GZMA,ZEB2,HLA-DPB1,RUNX3,S100A4,SYTL3,FABP5,HLA-DPA1,C12orf75,LINC01871,ID2,HCST,CD74,HLA-DRA,MT2A,EFHD2,SLF1,LMNA	•Positive/high: naïve markers TCF7, FHIT, EIF3E, LEF1, CD28, CCR7 (CD197), TSHZ2, SELL (CD62L) •Cell-surf proteins: CD8 low, CD4 high
Lymphocyte	L.7	PLIN2high CD8+ T-cell	8	TXN,PLIN2,SQSTM1,ANKRD28,MAP1LC3B,PRDX1,SLC3A2,FABP5	10	GIMAP7,PSMB9,GIMAP4,NKG7,AOAH,CORO1A,CD7,LCK,LDLRAD4,GZMB	•Similar to cluster 9. •Cell-surf proteins: low CD8 and CD4, but higher for the first compared to the second.
Lymphocyte	L.8	GZMB/GNLY/PRF1high CD8+ poly-cytotoxic T cell (CTL)	54	GNLY,KLRD1,KLRC3,TRDC,KLRC2,ABCB1,ATP8B4,LINC02446,IKZF2,KLRK1,NKG7,TYROBP,XCL2,AOAH,TRG-AS1,CTSW,CST7,PRF1,TIGIT,DUSP2,GZMB,CD7,CCL5,RIN3,SAMD3,SLAMF7,XCL1,PIK3R1,TRGC2,SYTL3,METRNL,CD63,CBLB,PTPN22,PITPNC1,ITGA1,GABARAPL1,KLRC1,AHI1,ZEB2,AUTS2,HOPX,ATP8A1,PLAAT4,GZMH,RRAS2,LINC01871,LYAR,FYN,AC022126.1,LITAF,IFITM2,GNPTAB,LYST	21	THEMIS,LTB,PAG1,CD2,ANK3,IL7R,CD6,TNFAIP8,ICOS,BCL11B,LINC02694,MFHAS1,PLIN2,HNRNPLL,JUN,LDLRAD4,SPOCK2,CD3G,KLRB1,GRAP2,BATF	•T-cell markers: TRAC+ CD3G+ •Positive/high: cytotoxic markers GZMB, GNLY and PRF1, NK receptors KLRD1 (CD94), KLRC3 (NKG2E), TRDC (TCR-delta), KLRC2, NCAM1 (CD56), NKG7 •Cell-surf proteins: CD3+, CD8 high, CD4 low. High CD56 prot expression, but lower than NK cell cluster (L.18).
Lymphocyte	L.9	PRDX1high CD8+ T cell	6	PRDX1,SQSTM1,H2AFZ,STMN1,SLC3A2,FABP5	180	PTPRC,CD96,RNF213,ETS1,MBNL1,EPSTI1,CAMK4,CD2,ZBTB20,WIPF1,EMB,GIMAP7,CD3G,ARHGAP15,FYB1,PARP8,CLEC2D,GIMAP4,DOCK8,BCL11B,PSMB9,PAG1,IL32,AOAH,LDLRAD4,CD3D,ANKRD44,SP100,ARHGAP25,EML4,CYBA,IL2RG,LCK,HLA-E,GMFG,SLFN5,EVL,RASGRP1,SMCHD1,IKZF1,SKAP1,LRBA,PPP1R16B,EPB41,ARHGDIB,CD3E,SYNE2,DOCK10,SEPTIN6,SLFN12L,PSME1,FYN,PDE3B,STAT1,RABGAP1L,STK4,SMAP2,JAML,SH3BGRL,ITGA1,IQGAP2,CCSER2,ITGA4,CHST11,LS…	•Cell-surf proteins: low CD8 and CD4, but higher for the first compared to the second.
Lymphocyte	L.10	Activated CD8+ T cell (ISG)	79	IFIT1,IFIT3,RSAD2,ISG15,HERC5,MX1,IFIT2,MX2,OAS1,IFI44L,ISG20,CMPK2,IFI44,IFI6,EPSTI1,OASL,EIF2AK2,HERC6,USP18,SAMD9,SAMD9L,LY6E,DDX58,OAS2,STAT1,PARP9,IFI16,OAS3,XAF1,IFIH1,PLSCR1,TRIM22,DDX60L,IFI35,DDX60,PNPT1,TNFSF10,RNF213,GBP1,IRF7,SP100,SLFN5,SPATS2L,DRAP1,SP110,PARP14,UBE2L6,BST2,LAP3,SAT1,PHF11,PSMB9,DTX3L,NMI,ALOX5AP,XRN1,CHST12,APOL6,PPM1K,C5orf56,CHMP5,DYNLT1,TRANK1,NUB1,PLAAT4,SMCHD1…	0	-	•Higher expression of Interferon-stimulated genes (ISG) such as IFIT1/2/3, ISG15 and MX1 even in the Mtb non-infected libraries. •Cell-surf proteins: CD8 high, CD4 low •Higher proportion in infected libraries
Lymphocyte	L.11	CREMhigh T cell	74	CREM,CNOT6L,FTH1,SRGN,CXCR4,IL7R,NR3C1,LEPROTL1,PDE4B,FYN,EML4,PIK3R1,NIBAN1,TENT5C,ZFP36L2,SARAF,IQGAP2,FKBP5,MFHAS1,CSGALNACT1,CEMIP2,SNX9,GRAMD1B,SIPA1L1,CAMK4,AOAH,WAKMAR2,SMAP2,EMB,CTLA4,TNFAIP3,ARID5B,METRNL,ICOS,TRPS1,YWHAB,PHACTR2,FOXP1,RNF125,DUSP4,SYTL3,GLIPR1,ZNF331,PPP1R16B,SPOCK2,RGS1,PDCD4,DUSP16,ALOX5AP,RFTN1,NUP98,PPP1CB,GSPT1,LDLRAD4,EVI2A,PDE3B,CMIP,EVI2B,TRAT1,DDIT4,KIAA0319L,P…	13	NKG7,CCL5,HSP90AB1,EMP3,LGALS1,PKM,GZMB,MT2A,APOBEC3G,CORO1A,CD63,SAMD3,ITGA1	•Mostly cells from 6h libraries. Lower CCL5 compared to neighbour clusters. •Cell-surf proteins: similar CD4 and CD8 (low)
Lymphocyte	L.12	MT2Ahigh CD8+ T cell	24	MT2A,MT1E,MT1X,MT1F,HSP90AB1,CRIP1,UBB,LMNA,TAGLN2,ZFAS1,HSPD1,PPP1R15A,DNAJA1,HSPA1A,HSPH1,MYADM,SRSF7,RGCC,ODC1,HSPB1,SRSF3,DDIT3,GADD45B,DNAJB9	85	RNF213,PSMB9,CD96,STAT1,GIMAP4,SLFN12L,WIPF1,FYB1,PSME1,CD3G,CAMK4,PSMB8,BCL11B,EMB,GIMAP7,IKZF1,DOCK8,LRBA,TRIM22,EPB41,EPSTI1,ANKRD44,CYBA,AOAH,CD247,RASGRP1,CD3D,IQGAP2,JAML,PDE3B,ALOX5AP,ZBTB20,LCK,GZMB,FAM102A,GMFG,PRKCQ,PRKCH,PAG1,PACS1,TRAF3IP3,ITGA1,PARP4,ARHGAP25,SOS1,SYNE1,PLAAT4,MYO1F,DPYD,CORO1A,TBC1D5,CD47,TC2N,LINC01871,FKBP5,PCNX1,INPP5D,PITPNC1,ATRX,VPS13C,ATP8A1,RESF1,PCED1B,COX6…	•Only cells from 6h libraries. •Cell-surf proteins: CD8 high, CD4 low
Lymphocyte	L.13	HSP90AB1high CD4+ T cell	34	HSP90AB1,TXNRD1,TSPYL2,BACH2,FAM107B,EZR,LRRFIP2,SQSTM1,PRDX1,PPP1R15A,SLCO3A1,ZSWIM6,SND1,PKM,AL627171.2,GCLM,CAMK1D,GPR183,DDX21,PEAK1,ERC1,FNIP1,PRKCB,MDM2,VMP1,AHR,HIVEP2,OGDH,SLC3A2,ADK,HSPH1,MYO1D,SPAG9,KLF12	41	CYBA,IL32,CCL5,ALOX5AP,CD2,CD52,ARHGDIB,CD3D,CD3G,CD3E,LCK,CST7,GMFG,AOAH,FYB1,JAML,HLA-DPB1,PSMB9,HLA-DRB1,HLA-DPA1,CXCR6,HOPX,S100A4,ZFP36L2,CORO1A,CD74,GIMAP7,APOBEC3G,YPEL3,GIMAP4,PLAAT4,HCST,LINC02694,EMB,TRAC,ITGA1,LSP1,LINC01871,GZMB,SLF1,NKG7	•Very low expression of T-markers TRAC & CD3G •Cell-surf proteins: CD8 low, CD4 high
Lymphocyte	L.14	FOShigh CD8+ T cell	90	FOS,HSPA1B,HSPA1A,FOSB,DNAJB1,HSPH1,HSP90AA1,HSP90AB1,ATF3,DNAJA1,HSPA8,HSPE1,UBB,HSPD1,PPP1R15A,UBC,JUN,GADD45B,SRSF7,CD69,ZFAND2A,KLF6,HMGCS1,JUND,MYADM,UBE2S,TSPYL2,RGCC,HSPB1,DDIT3,YPEL5,SERTAD1,TUBB4B,MORF4L2,SNHG12,CKS2,DNAJB6,TSC22D3,AHSA1,FKBP4,IFNG,DYNLL1,ZSWIM6,JUNB,TUBA1A,ZFAS1,BRD2,MRPL18,ODC1,IFRD1,CHORDC1,INTS6,TLE4,IER2,AMD1,ELOVL5,RSRC2,KLF2,CRY1,IDI1,EIF4A2,TCP1,SNHG5,BTG2,ATP2B1…	259	CD2,CYBA,HLA-A,IKZF1,HLA-B,YWHAB,RNF213,IL32,SH3BGRL3,HINT1,S100A6,CD3D,PTPRC,ALOX5AP,GIMAP7,HLA-C,MYL6,PSMB9,TRBC2,TMA7,MYL12B,CD3G,RPS27L,RABAC1,SRP14,CD96,ARPC1B,PSME1,JAML,UQCR11,ARL6IP5,GIMAP4,SEPTIN7,PRKCQ,ATP5F1E,LDHB,PDE3B,ISCU,PPP1R14B,ISG20,COX4I1,FYB1,ITM2B,EPB41,WIPF1,COX6C,ARPC3,PARK7,UQCR10,LCK,ARHGAP25,GMFG,ARPC2,NDUFA11,COX6B1,NEDD8,IL2RG,PSMA7,ELOB,ATP5MC3,NDUFB7,ARHGDIB,APRT,COX…	•Mostly cells from 6h libraries. •Cell-surf proteins: CD8 high, CD4 low.
Lymphocyte	L.15	PLCG2high T-cell	27	PLCG2,SIK3,SYNE2,BCL2,DENND4A,FOXN3,ANKRD44,CELF2,CAMK1D,ATP2B1,CHST11,ADGRE5,ZSWIM6,AHNAK,DYRK1A,SREBF2,HIVEP2,TLE4,RFX3,CHD2,FBXW7,XIST,ESYT2,ELOVL5,INTS6,FOXO1,MGAT5	670	B2M,RPLP1,TMSB4X,SH3BGRL3,RPS27A,RPL10,GAPDH,RPS14,RPL19,RPS19,RPL18,RPL15,RPS4X,RPS13,FAU,SRP14,ATP5F1E,RPL41,RPS3,RPL21,IL32,RPS7,RPL36AL,RPS27,RPL8,RPL18A,MYL12B,RPS10,RPS26,RPS3A,HINT1,TPT1,RPS15A,RPL6,RPS12,RPL30,RPS9,UBA52,RPL5,OAZ1,PFN1,RPL7A,RPL32,MYL6,CHCHD2,RPS16,RPL13,HLA-B,RPL17,HLA-A,PTMA,RPS18,RPS15,RPL28,RPS2,RPL10A,RPS5,MIF,CFL1,RPS23,NACA,S100A6,RPS28,RPL37,PSMA7,RPL23A,RPL39,H3F…	•Low expression of T-markers TRAC & CD3G •Cell-surf proteins: Similar Avg exp of all markers
Lymphocyte	L.16	CD4+ Regulatory T cell	233	F5,IL1R1,IKZF2,IL2RA,FANK1,LAYN,TBC1D4,FOXP3,TIGIT,TNFRSF4,ICA1,AC093865.1,TNFRSF9,ADAM12,HPGD,AL136456.1,TNFRSF18,STAM,CTLA4,PLCL1,AC017002.3,GK,MIR181A1HG,AC083837.1,HDAC9,RTKN2,VAV3,BATF,SELL,PHACTR2,ZC2HC1A,LINC01943,MARCH3,MAF,CARD16,TOX,PIM2,PELI1,MAST4,IPCEF1,LDLRAD4,LY75,ZC3H12D,BCL2,CD27,POU2F2,PMAIP1,ICOS,INPP5F,IL12RB2,SMAP2,MIR3142HG,BACH1,SNX9,ARID5B,CD28,TRAF3,PHTF2,ENTPD1,FAAH2,GPH…	72	ANXA1,CCL5,THEMIS,CD96,ALOX5AP,CD52,NKG7,SH3BGRL3,HOPX,MBP,ITGA1,LINC01871,AOAH,CLEC2B,HMGB1,TC2N,TGFBR2,CD99,JAML,FKBP5,ZFP36L2,GIMAP7,ANK3,GZMB,PLAAT4,PARP8,S100A11,ZEB2,RBMS1,COTL1,SLF1,ITGAE,APOBEC3G,SOS1,CST7,SUPT3H,STK17A,LCP1,LINC00623,GIMAP4,PDIA3,MGAT4A,RUNX3,CD69,PPP1R14B,TRAT1,CMIP,SFMBT2,GRAP2,MCUB,CD3G,RBPJ,ANKRD28,IL7R,PPIB,SLC4A7,CD81,AC245297.3,FABP5,DSTN,PLIN2,RALA,SAMD3,KRAS,SKI…	•Treg markers: FOXP3, FOXP1, IL2RA (CD25), STAM, CTLA4, IKZF2 •Cell-surf proteins: CD4 high, CD8 low
Lymphocyte	L.17	B cell	272	ID3,RALGPS2,FAM49A,BCL11A,IGKC,AFF3,COBLL1,UBE2E2,OSBPL10,CD86,ARHGAP24,BANK1,TBC1D9,MARCH1,TRIO,BASP1,MEF2C,EBF1,CDK14,TFEC,BLK,ADAM28,AC120193.1,LYN,PAX5,SYK,USP6NL,WDFY4,BLNK,SWAP70,MS4A1,DENND5B,LINC02397,RUBCNL,IGHM,TEX9,LINC00926,LRRK1,IRF8,TNFRSF13B,RAB31,TCF4,GNG7,CD79A,CD40,IGLC2,GRK3,LARGE1,HDAC9,KYNU,CLIC4,CLECL1,ALOX5,SOX5,HVCN1,PKIG,SMIM14,MTSS1,HLA-DRA,HLA-DMB,SETBP1,CD83,PIK3AP1,HL…	164	IL32,ANXA1,CD2,CCL5,CD3D,FYB1,THEMIS,IL7R,CD96,CD3G,TRAC,CAMK4,SKAP1,BCL11B,S100A6,FYN,CD3E,ITK,CD247,PTPRC,PRKCQ,TRBC1,SRGN,PRKCH,TRBC2,ITM2B,JAML,RORA,LEPROTL1,CST7,CALM1,NIBAN1,S100A4,ALOX5AP,SH3BGRL3,LCK,IQGAP2,TNFAIP3,GIMAP7,AAK1,CKLF,ARL4C,ETS1,CLEC2B,TC2N,INPP4B,ATP2B4,PTPN22,SLFN12L,SLFN5,ITM2A,TRAT1,GRAP2,S100A11,NKG7,HCST,SYNE2,CXCR6,LINC02694,ITGA1,ICOS,LGALS3,CD6,LINC01871,CD7,ITGAE,P…	•T-cell markers: TRAC- CD3G- •B-cell markers: IGHG+ IGKC+,CD79+, MS4A1+ •Cell-surf proteins: B marker CD19 high, T marker CD3 low
Lymphocyte	L.18	NK cell	116	KIT,GAB1,LINC00996,PPP1R9A,FCER1G,AFF3,RASSF8,TRDC,ATP8B4,SVIL,IFITM3,MAML3,PLCB1,AREG,TNFRSF18,ZNF704,TYROBP,IL1R1,AL136456.1,MIR181A1HG,NRIP1,XCL1,TIAM1,NCALD,SSBP2,CTSW,XCL2,BAZ2B,HIP1,CYSLTR1,AHI1,KLRB1,VAV3,PLAC8,DOCK5,IL4R,RIN3,CERS6,BACH2,ATP10A,MCTP2,MAP3K8,TCF7,PDE8A,MEF2A,KLRD1,NFKB1,GNLY,RNF130,SKAP2,KLRC1,STAM,ABCB1,ARHGAP10,AHR,PTPN12,PLCL2,CAPG,XYLT1,IFITM2,TIMP1,IL18R1,FNDC3B,ARHGA…	87	CD3D,CD2,CD3G,THEMIS,BCL11B,CCL5,CAMK4,CD3E,TRAC,S100A6,IKZF3,SYNE2,IL32,TRBC2,ALOX5AP,FYB1,GRAP2,COTL1,LINC02694,PPP2R5C,CD6,ATXN1,ITGAE,PCED1B-AS1,CST7,PAG1,CYBA,CLEC2D,LEPROTL1,CYTOR,RNF213,ITK,RORA,PYHIN1,GNG2,LCK,TRBC1,CDC42SE2,HLA-DPB1,ISG20,JAML,SLF1,ANXA2,TRAT1,RASGRP1,CXCR6,AOAH,PTPRJ,LBH,RUNX1,CD247,SH3KBP1,STAT5B,SYNE1,PRKCQ,ITGA1,C12orf75,PLIN2,APBB1IP,LDHA,SP140,PITPNC1,TC2N,C4orf48,…	•T-cell markers: TRAC- CD3G- •Positive/high: NCAM1 (CD56), FCER1G, TRDC, XCL1, TCF7, IL18R1 •Cell-surf proteins: cluster with highest CD56 prot expression. Lower CD3 and higher CD16, CD11c and CD14 compared to T-cell clusters
AM/DC	AM.0	ASH1Llow TR-AM	0	-	21	ASH1L,COP1,RASAL2,ABL2,ALCAM,ARHGAP24,SLC7A11,TRIO,ZSWIM6,ATXN1,ZFAND3,FOXO3,CDK14,DOCK4,AC083837.1,ASAP1,NEAT1,MAML2,SIK3,MED13L,NFAT5	No upregulated marker
AM/DC	AM.1	PEX14hi TR-AM	105	PEX14,EVI5,RABGAP1L,DISP1,CHRM3,CLIP4,SLC8A1,EML4,PSME4,ACYP2,EXOC6B,GTDC1,FMNL2,ATG7,PPARG,TBC1D5,DOCK3,FHIT,MITF,LSAMP,AC092691.1,TMCC1,PLD1,NCEH1,KLHL6,VPS8,LPP,TPRG1,GPRIN3,CAMK2D,RETREG1,ARL15,FCHO2,FAM172A,FBXL17,JAKMIP2,CDKAL1,DST,LINC00472,AL035446.2,UTRN,MACC1,ITGB8,TNS3,CDK14,COG5,IMMP2L,EXOC4,AC011586.2,SPIDR,VPS13B,SNTB1,NSMCE2,TTC39B,DENND4C,ZCCHC7,GNAQ,CORO2A,TBC1D2,MAPKAP1,PBX3,FRM…	10	CXCL8,CXCL3,CXCL2,IER3,HSPA1A,BTG1,CCL4,IL1B,MT1G,DNAJB1
AM/DC	AM.2	IL1Bhi TR-AM	23	IL1B,TNFAIP6,TNIK,PLD1,CXCL5,SLC39A8,SLC1A3,MCTP1,MIR3142HG,RNF144B,MARCKS,ITGB8,NCF1,DOCK4,DAPK1,ABCA1,IL18,DMXL2,CCL15,CCL4,PSTPIP2,GRAMD1A,HCK	3	HSPA1A,RGCC,HMOX1	•Include genes from GO-term “response to LPS” and “response to IL1”
AM/DC	AM.3	ERRFI1hi TR-AM	261	ERRFI1,SNHG12,SFPQ,ZC3H12A,MFSD2A,NASP,JUN,GADD45A,DNAJB4,CCDC18,BCAR3,LRIF1,C1orf162,S100A9,S100A8,FCGR2A,HSPA6,UAP1,GAS5,RASAL2,ABL2,IER5,PTGS2,CD55,ATF3,ERO1B,AKT3,ID2,KLHL29,YPEL5,CDC42EP3,FBXO11,PSME4,REL,B3GNT2,PELI1,MXD1,EIF2AK3,DUSP2,MAP4K4,IL1A,IL1B,MGAT5,RND3,NR4A2,SESTD1,ZNF804A,STK17B,HSPD1,HSPE1,CLK1,RAPH1,ACSL3,CCL20,STAC,CSRNP1,ABHD5,CCR5AS,RYBP,GBE1,ZNF654,MTRNR2L12,ST3GAL6,NFKBIZ…	164	MRPL20,RER1,ENO1,PGD,C1orf122,SMAP2,NRDC,LEPROT,RAB13,SLAMF7,NDUFS2,ARPC5,EPRS,IARS2,HADHA,CYP1B1,ANXA4,DDX18,CIR1,STAT1,XRCC5,CYP27A1,TBC1D5,MITF,ATP6V1A,MGLL,TMCC1,FAIM,PLD1,NCEH1,PSMD2,LAP3,ADH5,TNIP3,SLC7A11,NDUFC1,LSM6,SPCS3,IRF2,ACSL1,PDCD6,NDUFS6,SLC1A3,HINT1,GM2A,ATOX1,PRELID1,TMEM14B,NOL7,RNF144B,TDP2,ACOT13,TUBB,MRPL14,PLA2G7,DYNLT1,ITGB8,VPS41,TNS3,GTF2I,NCF1,GSAP,CD36,SRI,BRI3,DLD,AKR…	•Mostly cells from 6h lib. •Include genes from GO-term "positive regulation of apoptotic process".
AM/DC	MoAM.4	Infiltrating monocyte-derived AM	103	TNFRSF1B,DPYD,VAV3,PLEKHO1,IL6R,CD84,CD48,SLAMF7,RGL1,CRIM1,CYP1B1,TMEM163,ZNF804A,PID1,ARMC9,CCR1,MITF,ALCAM,SLC9A9,ATP13A3,CXCL8,CXCL1,ANTXR2,ARHGAP24,SLC39A8,TET2,SLC7A11,ARHGAP10,TLR2,BASP1,SLC1A3,IQGAP2,LHFPL2,LUCAT1,DPYSL3,TNIP1,RNF145,JARID2,ATXN1,IER3,PLA2G7,SNX9,TNS3,DOCK4,CLEC5A,PRKAG2,DOCK5,ASPH,PDE7A,MSC-AS1,MSC,SDC2,LRP12,MTSS1,ASAP1,ST3GAL1,MSANTD3,ABCA1,SLC44A1,TRAF1,NIBAN2,RAPGEF1…	89	C1QA,C1QB,CD52,S100A13,MGST3,PHLDA3,FAM89A,CHRM3,SCCPDH,KLHL29,CDC42EP3,PSME4,ACYP2,IL1A,MARCO,GYPC,RND3,IGFBP2,CCL20,PPARG,STAC,ABHD5,LSAMP,AC092691.1,PCOLCE2,MME,ABCG2,SPRY1,HPGD,RETREG1,PPIC,ADTRP,HLA-DQB1,TREM1,DST,LINC00472,MYO6,CITED2,MACC1,BLVRA,MSR1,AC011586.2,FABP4,CA2,ACO1,AKR1C2,AKR1C3,SVIL,RBP4,PDLIM1,SCD,ANO5,SERPING1,PLAAT3,FOLR3,CTSC,CARD16,AC026369.3,LDHB,AMIGO2,ALDH2,PEBP1,OASL,A…	•Monocyte lineage markers such as CCL2 and CSFR1. •Lower expression of tissue-resident AM markers such as MARCO, PPARG and FABP4. •Include genes from GO-term "cell chemotaxis".
AM/DC	AM.5	IFI27hi TR-AM	1	IFI27	2	CCL18,CXCL2	•IFI27 is the only up-regulated maker.
AM/DC	AM.6	MT2Ahi TR-AM	8	MT2A,MT1E,MT1M,MT1A,MT1F,MT1G,MT1H,MT1X	0	-	•Upregulated genes are Metallothioneins
AM/DC	AM.7	ISG15hi TR-AM (Activ Mac)	56	ISG15,IFI6,NEXN,IFI44L,IFI44,GBP1,GBP4,ADAR,MNDA,IFI16,CMPK2,RSAD2,EIF2AK2,PNPT1,IFIH1,STAT1,SP110,PARP9,DTX3L,PARP14,XRN1,PLSCR1,LAP3,HERC6,HERC5,DDX60,DDX60L,PSMB9,TAP1,DYNLT1,NT5C3A,SAMD9,SAMD9L,DDX58,IFIT2,IFIT3,IFIT1,IFITM3,IRF7,TRIM22,UBE2L6,STAT2,OAS1,OAS3,OAS2,OASL,EPSTI1,TNFSF13B,ISG20,XAF1,IFI35,RNF213,MX2,MX1,USP18,APOL6	0	-	•Interferon-stimulated genes even in the Mtb non-infected libraries. •Include genes from GO-term "defense response to virus"
AM/DC	AM.8	ANXA1hi TR-AM	13	ATF3,MED10,UPP1,ANXA1,SLC3A2,GABARAPL1,ZFAS1,ATF4,RSAD2,AKR1C1,TFPI,AKR1C2,FABP3	70	C1QC,C1QB,PTPRC,IL1B,TNIK,NCEH1,SLC39A8,SLC1A3,RNF144B,PLA2G7,MARCKS,ACTB,GSAP,FBP1,GSN,PIK3AP1,CD81,SLC15A3,IL18,OLR1,ARHGDIB,LTA4H,ALDH2,CTSH,IGSF6,CCL4,CCL4L2,GRN,ACTG1,PSTPIP2,FCGRT,HCK,CYBB,HLA-DMB,SLC8A1,BHLHE41,ACP5,ITGB2,KCTD12,SEMA3C,TNFAIP6,SPRED1,S100A9,GRAMD1A,AIF1,NCF1,FN1,LRMDA,S100A8,SAMHD1,CPM,FPR3,MRC1,ITPR2,DMXL2,MCEMP1,ATP2B1,LIPA,CRIM1,CXCL3,CXCL5,CXCL2,CRIP1,IL1A,CLEC4E,CCL3,…	•Low C1QB/C. •Include genes from GO-term "cellular response to starvation"
AM/DC	DC.9	Dendritic cell (DC)	411	TNFRSF18,TNFRSF4,TNFRSF9,GPR157,RUNX3,MARCKSL1,MCOLN2,DIPK1A,ETV3,RCSD1,NIBAN1,RGS1,LAD1,NAV1,TRAF5,ID2,FAM49A,REL,SPRED2,IL1R1,BCL2L11,CXCR4,CYTIP,CERS6,AC007319.1,CALCRL,STAT4,CFLAR,ARL4C,RAMP1,RFTN1,FOXP1,GCSAM,POGLUT1,CD86,CHST2,SLC9A9,LAMP3,MAP3K13,ARAP2,ANTXR2,CCSER1,DAPP1,NFKB1,SLC7A11,PALLD,AHRR,ANKRD33B,BASP1,SUB1,GPBP1,ZNF366,ST8SIA4,TNFAIP8,LMNB1,ANXA6,ADAM19,RNF145,IRF4,SERPINB9,SLC22…	882	AGTRAP,EFHD2,C1QA,C1QC,C1QB,SH3BGRL3,CD52,FGR,IFI6,STX12,LAPTM5,C1orf122,YBX1,SCP2,PLPP3,LEPROT,TMED5,CSF1,CD53,C1orf162,CTSS,S100A11,S100A9,S100A6,S100A4,S100A13,LMNA,FCER1G,FCGR3A,MGST3,SOAT1,GLUL,NCF2,PTPRC,PHLDA3,FAM89A,SCCPDH,CDC42EP3,EML4,UGP2,HK2,CAPG,VAMP8,IL1RN,MARCO,GYPC,HNMT,TNFAIP6,FMNL2,GPD2,RBMS1,FN1,SLC11A1,CYP27A1,CCL20,PPARG,SH3BP5,PDCD6IP,STAC,ABHD5,CCRL2,FAIM,PCOLCE2,RNF13,MME,…	•mDC markers such as LAMP3 and CCL22. •Include genes from GO-term "regulation of lymphocyte activation"
AM/DC	AM.10	PDIA6hi TR-AM	163	PDIA6,GFPT1,GMPPB,MANF,SELENOK,ARF4,SERP1,SSR3,DNAJB11,OSTC,SEC24D,KDELR2,SEC61G,DNAJB9,PDIA4,SEC61B,HSPA5,NUCB2,CDK2AP2,SPCS2,HYOU1,DDIT3,HSP90B1,FICD,TMED2,PDIA3,PPIB,SELENOS,HERPUD1,DERL2,SEC11C,LMAN1,CALR,HM13,HSPA13,SDF2L1,CRELD2,SEC31A,MIS12,TRAM1,SSR2,MYDGF,PGM3,LARP1B,TIMM17A,P4HB,SLC3A2,GNL3,CALU,GOLT1B,DNAJC3,MORF4L2,TMED7,SLC35B1,TVP23C,MTDH,UFM1,LRRC59,ZFAS1,TMED9,SRP19,MAGT1,SSR1,TFG…	44	C1QB,CTSB,FCER1G,TGOLN2,CYBB,NCEH1,TFRC,OLR1,IGSF6,LTA4H,TNIK,BLOC1S1,LCP1,ENG,HCK,PTPRC,PLA2G7,SLC1A3,BHLHE41,SLC11A1,GSN,SAMHD1,GM2A,CPM,ALAS1,SLC43A2,DMXL2,NCF1,MITF,GTF2I,MYO1F,MCTP1,GPRIN3,SLC39A8,FRMD4A,SEMA3C,PLXDC2,GCHFR,CCL4,CCL4L2,PLD1,CHST11,CLEC4E,CCL15	•Include genes from GO-term "response to endoplasmic reticulum stress"
AM/DC	AM.11	Proliferating AM	185	STMN1,CLSPN,CDCA8,CDC20,KIF2C,DEPDC1,NUF2,ASPM,KIF14,UBE2T,CENPF,RRM2,CENPA,BUB1,CKAP2L,SPC25,SGO2,HJURP,SGO1,KIF15,CIP2A,POLQ,SMC4,TACC3,NCAPG,CENPE,MAD2L1,CCNA2,CENPU,CENPK,CCNB1,PTTG1,HMMR,HIST1H1D,HIST1H1B,KIFC1,CENPW,MTFR2,ANLN,NCAPG2,ESCO2,PBK,GGH,MELK,PHF19,ZWINT,CDK1,KIF20B,KIF11,CEP55,MKI67,CHEK1,RAD51AP1,TROAP,RACGAP1,PARPBP,CIT,CKAP2,DIAPH3,CDKN3,DLGAP5,ARHGAP11B,ARHGAP11A,BUB1B,KNL1,N…	15	TYROBP,BCL2A1,CHCHD10,HCST,TFRC,ATOX1,TYMP,ANO5,GSN,CIR1,PLA2G7,SAMD4A,IMMP2L,CHRM3,CCL15	•Cell cycling markers STMN1, CDK1 and MKI67. •Include genes from GO-term "mitotic nuclear division".
AM: Alveolar macrophage, DC: Dendritic cell, DEG: Differentially expressed gene, L: Lymphocyte, NK: Natural killer
	Cluster	Top 5 (Up)
	L.0	LINC02694,JAML,SLC4A7,THEMIS,DAPK2
	L.1	ALOX5AP,LGALS3,CCL5,SLC35F1,S100A4
	L.2	C1orf21,CD8A,CD8B,GZMK,NKG7
	L.3	RGS16,ACTB,GZMB,ACTG1,PFN1
	L.4	CD96,ITGA1,PARP8,THEMIS,DAPK2
	L.5	RPS13,EEF1B2,CCR7,SELL,KLF2
	L.6	FAAH2,LEF1,TSHZ2,CCR7,SELL
	L.7	TXN,PLIN2,SQSTM1,ANKRD28,MAP1LC3B
	L.8	GNLY,KLRD1,KLRC3,TRDC,KLRC2
	L.9	PRDX1,SQSTM1,H2AFZ,STMN1,SLC3A2
	L.10	IFIT1,IFIT3,RSAD2,ISG15,HERC5
	L.11	CREM,CNOT6L,FTH1,SRGN,CXCR4
	L.12	MT2A,MT1E,MT1X,MT1F,HSP90AB1
	L.13	HSP90AB1,TXNRD1,TSPYL2,BACH2,FAM107B
	L.14	FOS,HSPA1B,HSPA1A,FOSB,DNAJB1
	L.15	PLCG2,SIK3,SYNE2,BCL2,DENND4A
	L.16	F5,IL1R1,IKZF2,IL2RA,FANK1
	L.17	ID3,RALGPS2,FAM49A,BCL11A,IGKC
	L.18	KIT,GAB1,LINC00996,PPP1R9A,FCER1G
	AM.0	-
	AM.1	PEX14,EVI5,RABGAP1L,DISP1,CHRM3
	AM.2	IL1B,TNFAIP6,TNIK,PLD1,CXCL5
	AM.3	ERRFI1,SNHG12,SFPQ,ZC3H12A,MFSD2A
	MoAM.4	TNFRSF1B,DPYD,VAV3,PLEKHO1,IL6R
	AM.5	IFI27
	AM.6	MT2A,MT1E,MT1M,MT1A,MT1F
	AM.7	ISG15,IFI6,NEXN,IFI44L,IFI44
	AM.8	ATF3,MED10,UPP1,ANXA1,SLC3A2
	DC.9	TNFRSF18,TNFRSF4,TNFRSF9,GPR157,RUNX3
	AM.10	PDIA6,GFPT1,GMPPB,MANF,SELENOK
	AM.11	STMN1,CLSPN,CDCA8,CDC20,KIF2C
