# Supplementary material for: Mycobacterium tuberculosis resisters despite HIV exhibit activated T cells and macrophages in their pulmonary alveoli
Source: Research Square preprint supplement (doi:10.21203/rs.3.rs-3889020/v1), 2024-01-31
Supplement: Supplementary file 2 [file 5cb53b86c73d48de7bb84408.xlsx]

## Sheet: Table S5
Supplementary Table 5. Significantly enriched GO-terms/pathways from DEG of AM and DC clusters between resisters and LTBI in the absence of Mtb (baseline).
				AM.0: Baseline Resisters vs LTBI							AM.1: Baseline Resisters vs LTBI							AM.2: Baseline Resisters vs LTBI							AM.3: Baseline Resisters vs LTBI							MoAM.4: Baseline Resisters vs LTBI							AM.5: Baseline Resisters vs LTBI							AM.6: Baseline Resisters vs LTBI
Direction a	Database	ID	Description	GeneRatio b	BgRatio c	pvalue d	p.adjust e	gene IDs f	Count g	PASS h	GeneRatio b	BgRatio c	pvalue d	p.adjust e	gene IDs f	Count g	PASS h	GeneRatio b	BgRatio c	pvalue d	p.adjust e	gene IDs f	Count g	PASS h	GeneRatio b	BgRatio c	pvalue d	p.adjust e	gene IDs f	Count g	PASS h	GeneRatio b	BgRatio c	pvalue d	p.adjust e	gene IDs f	Count g	PASS h	GeneRatio b	BgRatio c	pvalue d	p.adjust e	gene IDs f	Count g	PASS h	GeneRatio b	BgRatio c	pvalue d	p.adjust e
Combined	GO	GO:0000028	ribosomal small subunit assembly	4/808	16/8530	0.057864	0.99999	RPS27/RPL38/RPS27L/RPS28	4	FALSE	2/243	16/9003	0.0679148	0.912156	RPL38/RPS27	2	FALSE	NA	NA	NA	NA	NA	NA	NA	3/641	16/8351	0.11939	0.999498	RPL38/RPS27/RPS28	3	FALSE	3/771	16/8398	0.176485	0.999955	RPL38/RPS27/RPS28	3	FALSE	2/177	16/8059	0.0470436	0.978494	RPL38/RPS27	2	FALSE	3/482	16/7787	0.0723162	0.975029
Combined	GO	GO:0002181	cytoplasmic translation	15/808	148/8530	0.431541	0.99999	EIF3J/RPL39/RPS29/RPS27/RPL38/RPS21/MCTS1/SYNCRIP/RPL37/RPL24/RPL37A/RPL36/RPS28/RPL22/EIF4B	15	FALSE	4/243	149/9003	0.575105	0.912156	EIF3J/RPS29/RPL38/RPS27	4	FALSE	NA	NA	NA	NA	NA	NA	NA	19/641	147/8351	0.0169174	0.822218	RPS29/RPL39/RPL38/RPS27/RPS21/RPL37A/RPL37/RPL36/RPS17/RPS28/NCBP2/RPL6/EIF3J/RPL35A/YTHDF2/RPL24/RPL22/RPS15A/NCK1	19	FALSE	17/771	147/8398	0.190435	0.999955	RPS29/RPL38/RPS27/RPL39/RPS21/RPS28/RPL36/RPL37A/EIF3J/RPL37/RPL22/RPL41/RPL24/NCBP2/RPL34/RPL35A/RPLP2	17	FALSE	6/177	147/8059	0.104496	0.978494	RPS29/RPL38/RPS27/RPL37A/RPL39/RPL24	6	FALSE	23/482	147/7787	3.15203e-05	0.00464825
Combined	GO	GO:0006412	translation	NA	NA	NA	NA	NA	NA	NA	NA	NA	NA	NA	NA	NA	NA	NA	NA	NA	NA	NA	NA	NA	NA	NA	NA	NA	NA	NA	NA	NA	NA	NA	NA	NA	NA	NA	NA	NA	NA	NA	NA	NA	NA	NA	NA	NA	NA
Combined	GO	GO:0006518	peptide metabolic process	NA	NA	NA	NA	NA	NA	NA	NA	NA	NA	NA	NA	NA	NA	NA	NA	NA	NA	NA	NA	NA	NA	NA	NA	NA	NA	NA	NA	NA	NA	NA	NA	NA	NA	NA	NA	NA	NA	NA	NA	NA	NA	NA	NA	NA	NA
Combined	GO	GO:0010043	response to zinc ion	1/808	24/8530	0.908533	0.99999	SLC30A4	1	FALSE	3/243	27/9003	0.0352537	0.912156	MT1H/MT1G/HVCN1	3	FALSE	1/106	27/8729	0.281346	0.605489	HVCN1	1	FALSE	4/641	24/8351	0.107442	0.994206	MT1G/MT1A/MT1E/MTF1	4	FALSE	2/771	24/8398	0.660723	0.999955	HVCN1/LTA4H	2	FALSE	NA	NA	NA	NA	NA	NA	NA	9/482	23/7787	4.63117e-06	0.000809425
Combined	GO	GO:0010273	detoxification of copper ion	NA	NA	NA	NA	NA	NA	NA	2/243	10/9003	0.0283021	0.912156	MT1H/MT1G	2	FALSE	NA	NA	NA	NA	NA	NA	NA	3/641	10/8351	0.0359301	0.873135	MT1G/MT1A/MT1E	3	FALSE	NA	NA	NA	NA	NA	NA	NA	NA	NA	NA	NA	NA	NA	NA	7/482	10/7787	3.40103e-07	0.000100309
Combined	GO	GO:0015980	energy derivation by oxidation of organic compounds	29/808	248/8530	0.136122	0.99999	SELENOS/NDUFB1/PHKG1/MTLN/PPP1CB/NDUFA3/ATP5ME/UQCC3/ATP5F1E/NR4A3/SLC25A51/CYCS/COX7B/ETFRF1/MT-ATP8/MT-ND2/UQCRB/ATP5MF/MT-ND4L/SDHAF2/GHITM/DYRK2/PYGB/SLC25A25/LEPR/GSK3B/NOA1/DHTKD1/ETFDH	29	FALSE	6/243	251/9003	0.676303	0.917948	SELENOS/NDUFB1/NR4A3/DYRK2/PYGB/STK40	6	FALSE	3/106	251/8729	0.592243	0.749398	PDE12/SELENOS/GHITM	3	FALSE	22/641	248/8351	0.268492	0.999498	MYC/NDUFB1/NDUFA3/ATP5F1E/ATP5ME/SELENOS/COX7B/CYCS/NDUFA1/MT-ATP8/UQCRB/PPIF/PHLDA2/UQCRH/ATP5MF/COX6C/COX7C/PYGB/LEPR/TP53/POLG2/MTFR1	22	FALSE	29/771	247/8398	0.099218	0.930377	SELENOS/ATP5F1E/MTLN/NDUFB1/MT-ATP8/PRKAG2/GHITM/NDUFA3/ATP5MF/COX7A2/COX7B/UQCC3/NR4A3/ATP5ME/NDUFA1/NDUFC1/MTFR1L/UQCR11/MT-ND4L/COX7A2L/SDHAF2/PHLDA2/PYGB/DHTKD1/LEPR/STK40/GYS1/PHKA2/FLCN	29	FALSE	4/177	239/8059	0.775638	0.979078	SELENOS/CYCS/ATP5ME/PYGB	4	FALSE	11/482	239/7787	0.882803	0.999803
Combined	GO	GO:0034645	cellular macromolecule biosynthetic process	NA	NA	NA	NA	NA	NA	NA	NA	NA	NA	NA	NA	NA	NA	NA	NA	NA	NA	NA	NA	NA	NA	NA	NA	NA	NA	NA	NA	NA	NA	NA	NA	NA	NA	NA	NA	NA	NA	NA	NA	NA	NA	NA	NA	NA	NA
Combined	GO	GO:0042254	ribosome biogenesis	37/808	283/8530	0.0265036	0.888621	CINP/RSL24D1/DCAF13/RRP15/RBIS/RPS27/RPL38/EIF6/TMA16/NIP7/RPS21/RPF2/GTF2H5/DDX21/BRIX1/C1D/MRPL36/RPF1/NIFK/RPS27L/C1QBP/RPL24/RAN/DHX30/RPS28/POP4/UTP4/TFB2M/MRPL20/METTL5/GAR1/ESF1/RPUSD3/NSUN5/EXOSC6/MTG2/CHD7	37	FALSE	17/243	287/9003	0.00195019	0.912156	DCAF13/RRP15/C1QBP/NIFK/CINP/EIF6/RPF2/MAK16/RBIS/GAR1/RPL38/RSL24D1/NIP7/DDX21/BRIX1/RPS27/DDX3X	17	FALSE	11/106	286/8729	0.000674246	0.27411	RRP15/CINP/DCAF13/EIF6/TFB2M/ESF1/MAK16/C1QBP/URB1/RBIS/GTF2H5	11	FALSE	23/641	271/8351	0.337327	0.999498	DCAF13/RPL38/RPS27/RBIS/RPS21/RPS17/RPS28/GTPBP4/MRPL36/RPL6/RSL24D1/C1D/RPL35A/YTHDF2/EIF6/RPL24/WDR74/HELB/MTG2/MTREX/SPATA5/DDX54/METTL16	23	FALSE	29/771	281/8398	0.279006	0.999955	CINP/RPL38/RPS27/DCAF13/EIF6/RPS21/RSL24D1/RRP15/MAK16/RPS28/RBIS/TMA16/DDX18/ESF1/C1QBP/POP4/DDX21/NOP58/UTP11/DDX27/C1D/RPL24/RAN/URB2/RPL35A/BYSL/CHD7/AATF/EXOSC7	29	FALSE	14/177	273/8059	0.00268277	0.762518	DCAF13/RPL38/CINP/EIF6/NIP7/RPS27/DIMT1/RRP15/EMG1/RSL24D1/C1D/RPL24/RPF2/TMA16	14	FALSE	21/482	271/7787	0.168418	0.999803
Combined	GO	GO:0042255	ribosome assembly	12/808	54/8530	0.00393367	0.427968	RPS27/RPL38/EIF6/NIP7/RPF2/BRIX1/RPS27L/C1QBP/RPL24/DHX30/RPS28/MRPL20	12	FALSE	8/243	54/9003	8.92644e-05	0.167014	C1QBP/EIF6/RPF2/RPL38/NIP7/BRIX1/RPS27/DDX3X	8	FALSE	2/106	54/8729	0.139473	0.60283	EIF6/C1QBP	2	FALSE	6/641	52/8351	0.206494	0.999498	RPL38/RPS27/RPS28/RPL6/EIF6/RPL24	6	FALSE	6/771	53/8398	0.359075	0.999955	RPL38/RPS27/EIF6/RPS28/C1QBP/RPL24	6	FALSE	6/177	52/8059	0.00090796	0.60829	RPL38/EIF6/NIP7/RPS27/RPL24/RPF2	6	FALSE	7/482	52/7787	0.0397966	0.79915
Combined	GO	GO:0042274	ribosomal small subunit biogenesis	8/808	72/8530	0.372838	0.99999	DCAF13/RPS27/RPL38/RPS21/GTF2H5/RPS27L/RPS28/UTP4	8	FALSE	3/243	72/9003	0.307673	0.912156	DCAF13/RPL38/RPS27	3	FALSE	2/106	72/8729	0.21764	0.60283	DCAF13/GTF2H5	2	FALSE	7/641	68/8351	0.265097	0.999498	DCAF13/RPL38/RPS27/RPS21/RPS17/RPS28/HELB	7	FALSE	6/771	72/8398	0.658766	0.999955	RPL38/RPS27/DCAF13/RPS21/RPS28/BYSL	6	FALSE	4/177	70/8059	0.0674708	0.978494	DCAF13/RPL38/RPS27/EMG1	4	FALSE	7/482	69/7787	0.133231	0.999803
Combined	GO	GO:0043043	peptide biosynthetic process	NA	NA	NA	NA	NA	NA	NA	NA	NA	NA	NA	NA	NA	NA	NA	NA	NA	NA	NA	NA	NA	NA	NA	NA	NA	NA	NA	NA	NA	NA	NA	NA	NA	NA	NA	NA	NA	NA	NA	NA	NA	NA	NA	NA	NA	NA
Combined	GO	GO:0043603	cellular amide metabolic process	NA	NA	NA	NA	NA	NA	NA	NA	NA	NA	NA	NA	NA	NA	NA	NA	NA	NA	NA	NA	NA	NA	NA	NA	NA	NA	NA	NA	NA	NA	NA	NA	NA	NA	NA	NA	NA	NA	NA	NA	NA	NA	NA	NA	NA	NA
Combined	GO	GO:0043604	amide biosynthetic process	NA	NA	NA	NA	NA	NA	NA	NA	NA	NA	NA	NA	NA	NA	NA	NA	NA	NA	NA	NA	NA	NA	NA	NA	NA	NA	NA	NA	NA	NA	NA	NA	NA	NA	NA	NA	NA	NA	NA	NA	NA	NA	NA	NA	NA	NA
Combined	GO	GO:0061687	detoxification of inorganic compound	NA	NA	NA	NA	NA	NA	NA	2/243	12/9003	0.0400686	0.912156	MT1H/MT1G	2	FALSE	NA	NA	NA	NA	NA	NA	NA	3/641	12/8351	0.058758	0.919454	MT1G/MT1A/MT1E	3	FALSE	NA	NA	NA	NA	NA	NA	NA	NA	NA	NA	NA	NA	NA	NA	7/482	12/7787	2.01188e-06	0.00040195
Combined	GO	GO:0071280	cellular response to copper ion	1/808	17/8530	0.816114	0.99999	PRNP	1	FALSE	3/243	17/9003	0.00998029	0.912156	MT1H/MT1G/BACE1	3	FALSE	NA	NA	NA	NA	NA	NA	NA	3/641	17/8351	0.137127	0.999498	MT1G/MT1A/MT1E	3	FALSE	1/771	18/8398	0.82364	0.999955	BACE1	1	FALSE	1/177	17/8059	0.314709	0.978494	BACE1	1	FALSE	7/482	17/7787	3.76037e-05	0.00537733
Combined	GO	GO:0071294	cellular response to zinc ion	NA	NA	NA	NA	NA	NA	NA	3/243	16/9003	0.00838388	0.912156	MT1H/MT1G/HVCN1	3	FALSE	1/106	16/8729	0.177703	0.60283	HVCN1	1	FALSE	4/641	15/8351	0.0237214	0.869496	MT1G/MT1A/MT1E/MTF1	4	FALSE	1/771	15/8398	0.764431	0.999955	HVCN1	1	FALSE	NA	NA	NA	NA	NA	NA	NA	9/482	15/7787	4.44003e-08	2.32806e-05
Combined	GO	GO:0097501	stress response to metal ion	NA	NA	NA	NA	NA	NA	NA	2/243	12/9003	0.0400686	0.912156	MT1H/MT1G	2	FALSE	NA	NA	NA	NA	NA	NA	NA	3/641	12/8351	0.058758	0.919454	MT1G/MT1A/MT1E	3	FALSE	NA	NA	NA	NA	NA	NA	NA	NA	NA	NA	NA	NA	NA	NA	7/482	12/7787	2.01188e-06	0.00040195
Combined	GO	GO:1990169	stress response to copper ion	NA	NA	NA	NA	NA	NA	NA	2/243	10/9003	0.0283021	0.912156	MT1H/MT1G	2	FALSE	NA	NA	NA	NA	NA	NA	NA	3/641	10/8351	0.0359301	0.873135	MT1G/MT1A/MT1E	3	FALSE	NA	NA	NA	NA	NA	NA	NA	NA	NA	NA	NA	NA	NA	NA	7/482	10/7787	3.40103e-07	0.000100309
Combined	Kegg	hsa03010	Ribosome	19/380	127/4154	0.0207412	0.793706	MRPL36/RPS21/RPL39/RPL22/MRPL19/RPS28/MRPL12/RSL24D1/RPS29/RPL37/RPL36/RPS27L/MRPL30/RPL38/RPS27/MRPL20/RPL24/RPL37A/MRPL33	19	FALSE	5/117	127/4362	0.253747	0.912156	RSL24D1/RPS29/RPL38/RPS27/MRPL33	5	FALSE	1/47	127/4236	0.762744	0.841245	MRPL19	1	FALSE	19/320	127/4090	0.00413611	0.603069	RPS17/MRPL36/RPS21/RPS15A/RPL39/RPL22/MRPL19/RPS28/RSL24D1/RPS29/RPL37/RPL36/RPS17/RPL38/RPS27/RPL6/RPL35A/RPL24/RPL37A/MRPL33	19	FALSE	19/382	127/4098	0.0247352	0.759394	RPS21/RPL39/RPL22/RPS28/MRPL12/RPLP2/RSL24D1/MRPS18C/RPL34/RPS29/RPL37/RPL36/RPL38/RPS27/RPL41/RPL35A/RPL24/RPL37A/MRPL33	19	FALSE	9/84	127/3923	0.00138899	0.60829	RPL39/RSL24D1/MRPS18C/RPS29/RPL38/RPS27/RPL24/RPL37A/MRPL33	9	FALSE	24/255	127/3812	2.13081e-06	0.000402212
Combined	Kegg	hsa05171	Coronavirus disease - COVID-19	18/380	168/4154	0.272628	0.99999	CFD/RPS21/RPL39/RPL22/RPS28/RSL24D1/STAT3/RPS29/RPL37/RPL36/RPS27L/RPL38/RPS27/TBK1/MAPK14/CFD/RPL24/RPL37A/IL6R	18	FALSE	5/117	167/4362	0.466912	0.912156	RSL24D1/TRAF3/RPS29/RPL38/RPS27	5	FALSE	NA	NA	NA	NA	NA	NA	NA	22/320	167/4090	0.00990084	0.743591	RPS17/CFD/RPS21/RPS15A/C5AR1/RPL39/RPL22/RPS28/RSL24D1/TRAF3/RPS29/RPL37/RPL36/RPS17/CXCL8/RPL38/RPS27/CFD/RPL6/IL6/RPL35A/RPL24/RPL37A/IL6R	22	FALSE	22/382	166/4098	0.0553347	0.900836	CFD/RPS21/RPL39/RPL22/RPS28/RPLP2/RSL24D1/STAT3/RPL34/RPS29/RPL37/RPL36/CXCL8/RPL38/RPS27/C3/MAPK14/CFD/RPL41/RPL35A/RPL24/RPL37A/IL6R	22	FALSE	8/84	162/3923	0.0215119	0.978494	CFD/RPL39/RSL24D1/RPS29/RPL38/RPS27/CFD/RPL24/RPL37A	8	FALSE	29/255	161/3812	5.00048e-07	0.000138807
Combined	Reactome	R-HSA-1266738	Developmental Biology	58/542	499/5794	0.0438469	0.99999	MED16/POLR2A/LIMK2/MED10/RPS21/RPS6KA5/MYL12B/PRNP/TFDP1/MED31/POLR2K/CDK19/MED30/MAGOHB/NR6A1/SDC2/DPYSL3/TLN1/MED21/RPL39/RPL22/ZNF638/MED9/MAGOH/RPS28/TRIM33/POLR2L/ELOC/STAT3/FABP4/POLR2A/ARHGEF28/GSK3B/RPS29/MYO9B/RPL37/GAB1/RPL36/MED7/CHD9/RPS27L/SPTAN1/RPL38/ARPC4/RPS27/MAPK14/MED16/CLASP2/KMT2A/SEM1/DLG1/NCOA1/SOS1/NRAS/RPL24/ARHGEF11/RPL37A/RHOC/CDC42/IL6R	58	FALSE	NA	NA	NA	NA	NA	NA	NA	NA	NA	NA	NA	NA	NA	NA	46/452	499/5681	0.157531	0.999498	FAM120B/RPS17/MED10/RPS21/LPL/POLR2K/RPS15A/CDK19/MYC/NR6A1/KLF4/RPL39/RPL22/NCK1/ZNF638/FAM120B/DOCK1/RPS28/TRIM33/POLR2L/ELOC/GRB2/FABP4/KRT10/RBBP5/ARHGEF28/ASH2L/RPS29/RPL37/GAB1/RPL36/MED7/CHD9/RPS17/RPL38/KMT2C/CTCF/RPS27/CLASP2/SEM1/RPL6/NCBP2/RPL35A/RPL24/ARHGEF11/RPL37A/RHOC/IL6R	46	FALSE	NA	NA	NA	NA	NA	NA	NA	18/122	473/5478	0.0163993	0.968897	MED16/MED10/MYL12B/MED31/MAGOHB/RPL39/MAGOH/VAV3/POLR2L/EGR2/RPS29/MED7/RPL38/RPS27/MED16/RPL24/ARHGEF11/RPL37A/RHOC	18	FALSE	49/328	469/5333	0.000116387	0.0156923
Combined	Reactome	R-HSA-156827	L13a-mediated translational silencing of Ceruloplasmin expression	15/542	105/5794	0.0629551	0.99999	RPS21/RPL39/RPL22/RPS28/EIF3J/EIF4E/RPS29/EIF4B/RPL37/RPL36/RPS27L/RPL38/RPS27/RPL24/RPL37A	15	FALSE	4/161	106/6080	0.308562	0.912156	EIF3J/RPS29/RPL38/RPS27	4	FALSE	NA	NA	NA	NA	NA	NA	NA	17/452	105/5681	0.00351748	0.576977	RPS17/RPS21/RPS15A/RPL39/RPL22/RPS28/EIF1AX/EIF3J/RPS29/RPL37/RPL36/RPS17/RPL38/RPS27/RPL6/RPL35A/RPL24/RPL37A	17	FALSE	17/522	105/5723	0.0134404	0.712467	RPS21/RPL39/RPL22/RPS28/RPLP2/EIF3J/RPL34/EIF4E/RPS29/RPL37/RPL36/RPL38/RPS27/RPL41/RPL35A/RPL24/RPL37A	17	FALSE	6/122	105/5478	0.0290173	0.978494	RPL39/RPS29/RPL38/RPS27/RPL24/RPL37A	6	FALSE	22/328	105/5333	2.51837e-07	9.14168e-05
Combined	Reactome	R-HSA-156842	Eukaryotic Translation Elongation	12/542	87/5794	0.109746	0.99999	RPS21/RPL39/RPL22/RPS28/RPS29/RPL37/RPL36/RPS27L/RPL38/RPS27/RPL24/RPL37A	12	FALSE	3/161	87/6080	0.406573	0.912156	RPS29/RPL38/RPS27	3	FALSE	NA	NA	NA	NA	NA	NA	NA	15/452	87/5681	0.00322899	0.576977	RPS17/RPS21/RPS15A/RPL39/RPL22/RPS28/RPS29/RPL37/RPL36/RPS17/RPL38/RPS27/RPL6/RPL35A/RPL24/RPL37A	15	FALSE	15/522	87/5723	0.0112823	0.687591	RPS21/RPL39/RPL22/RPS28/RPLP2/RPL34/RPS29/RPL37/RPL36/RPL38/RPS27/RPL41/RPL35A/RPL24/RPL37A	15	FALSE	6/122	87/5478	0.0125508	0.955122	RPL39/RPS29/RPL38/RPS27/RPL24/RPL37A	6	FALSE	21/328	87/5333	3.55392e-08	2.21226e-05
Combined	Reactome	R-HSA-156902	Peptide chain elongation	12/542	84/5794	0.0898057	0.99999	RPS21/RPL39/RPL22/RPS28/RPS29/RPL37/RPL36/RPS27L/RPL38/RPS27/RPL24/RPL37A	12	FALSE	3/161	84/6080	0.384973	0.912156	RPS29/RPL38/RPS27	3	FALSE	NA	NA	NA	NA	NA	NA	NA	15/452	84/5681	0.00226588	0.576977	RPS17/RPS21/RPS15A/RPL39/RPL22/RPS28/RPS29/RPL37/RPL36/RPS17/RPL38/RPS27/RPL6/RPL35A/RPL24/RPL37A	15	FALSE	15/522	84/5723	0.00818295	0.675902	RPS21/RPL39/RPL22/RPS28/RPLP2/RPL34/RPS29/RPL37/RPL36/RPL38/RPS27/RPL41/RPL35A/RPL24/RPL37A	15	FALSE	6/122	84/5478	0.0106602	0.955122	RPL39/RPS29/RPL38/RPS27/RPL24/RPL37A	6	FALSE	21/328	84/5333	1.81977e-08	2.14687e-05
Combined	Reactome	R-HSA-168255	Influenza Infection	17/542	149/5794	0.227349	0.99999	POLR2A/RPS21/POLR2K/RPL39/RPL22/PABPN1/RPS28/POLR2L/POLR2A/RPS29/RPL37/RPL36/RPS27L/RPL38/RPS27/RAN/RPL24/RPL37A	17	FALSE	3/161	150/6080	0.765323	0.943741	RPS29/RPL38/RPS27	3	FALSE	NA	NA	NA	NA	NA	NA	NA	20/452	148/5681	0.0128259	0.765156	RPS17/RPS21/POLR2K/RPS15A/RPL39/RPL22/PABPN1/RPS28/POLR2L/TPR/RPS29/RPL37/RPL36/RPS17/RPL38/RPS27/RPL6/RPL35A/NUP160/RPL24/RPL37A	20	FALSE	18/522	149/5723	0.131264	0.972884	RPS21/RPL39/RPL22/RPS28/RPLP2/POLR2L/TGFB1/RPL34/RPS29/RPL37/RPL36/RPL38/RPS27/RPL41/RAN/RPL35A/RPL24/RPL37A	18	FALSE	7/122	147/5478	0.0449204	0.978494	RPL39/POLR2L/RPS29/RPL38/RPS27/RPL24/RPL37A	7	FALSE	25/328	147/5333	2.43463e-06	0.000441886
Combined	Reactome	R-HSA-168273	Influenza Viral RNA Transcription and Replication	15/542	129/5794	0.223023	0.99999	POLR2A/RPS21/POLR2K/RPL39/RPL22/RPS28/POLR2L/POLR2A/RPS29/RPL37/RPL36/RPS27L/RPL38/RPS27/RPL24/RPL37A	15	FALSE	3/161	130/6080	0.674974	0.917948	RPS29/RPL38/RPS27	3	FALSE	NA	NA	NA	NA	NA	NA	NA	19/452	128/5681	0.00563476	0.643184	RPS17/RPS21/POLR2K/RPS15A/RPL39/RPL22/RPS28/POLR2L/TPR/RPS29/RPL37/RPL36/RPS17/RPL38/RPS27/RPL6/RPL35A/NUP160/RPL24/RPL37A	19	FALSE	16/522	129/5723	0.125968	0.972884	RPS21/RPL39/RPL22/RPS28/RPLP2/POLR2L/RPL34/RPS29/RPL37/RPL36/RPL38/RPS27/RPL41/RPL35A/RPL24/RPL37A	16	FALSE	7/122	127/5478	0.0226077	0.978494	RPL39/POLR2L/RPS29/RPL38/RPS27/RPL24/RPL37A	7	FALSE	24/328	127/5333	5.41593e-07	0.000141988
Combined	Reactome	R-HSA-1799339	SRP-dependent cotranslational protein targeting to membrane	20/542	106/5794	0.00167491	0.382493	RPS21/RPL39/SRP54/RPL22/SEC61G/SRP14/SPCS3/SRP19/RPS28/SEC61B/RPS29/RPL37/RPL36/RPS27L/RPL38/RPS27/SEC11A/SRP9/RPL24/RPL37A	20	FALSE	4/161	107/6080	0.314589	0.912156	SEC61G/RPS29/RPL38/RPS27	4	FALSE	1/68	106/5908	0.710099	0.817299	SEC61G	1	FALSE	21/452	106/5681	7.00525e-05	0.121539	RPS17/RPS21/RPS15A/RPL39/SRP54/RPL22/SEC61G/SRP14/RPS28/SEC61B/RPS29/SSR2/RPL37/RPL36/RPS17/RPL38/RPS27/RPL6/SRP9/RPL35A/RPL24/RPL37A	21	FALSE	21/522	106/5723	0.000476564	0.609899	RPS21/RPL39/RPL22/SEC61G/SPCS3/SRP19/RPS28/RPLP2/RPL34/SEC61B/RPS29/SSR2/RPL37/RPL36/RPL38/RPS27/RPL41/SRP9/RPL35A/RPL24/RPL37A	21	FALSE	6/122	106/5478	0.0302169	0.978494	RPL39/RPS29/RPL38/RPS27/RPL24/RPL37A	6	FALSE	25/328	106/5333	2.83308e-09	1.33693e-05
Combined	Reactome	R-HSA-192823	Viral mRNA Translation	12/542	84/5794	0.0898057	0.99999	RPS21/RPL39/RPL22/RPS28/RPS29/RPL37/RPL36/RPS27L/RPL38/RPS27/RPL24/RPL37A	12	FALSE	3/161	84/6080	0.384973	0.912156	RPS29/RPL38/RPS27	3	FALSE	NA	NA	NA	NA	NA	NA	NA	15/452	84/5681	0.00226588	0.576977	RPS17/RPS21/RPS15A/RPL39/RPL22/RPS28/RPS29/RPL37/RPL36/RPS17/RPL38/RPS27/RPL6/RPL35A/RPL24/RPL37A	15	FALSE	15/522	84/5723	0.00818295	0.675902	RPS21/RPL39/RPL22/RPS28/RPLP2/RPL34/RPS29/RPL37/RPL36/RPL38/RPS27/RPL41/RPL35A/RPL24/RPL37A	15	FALSE	6/122	84/5478	0.0106602	0.955122	RPL39/RPS29/RPL38/RPS27/RPL24/RPL37A	6	FALSE	21/328	84/5333	1.81977e-08	2.14687e-05
Combined	Reactome	R-HSA-2262752	Cellular responses to stress	NA	NA	NA	NA	NA	NA	NA	NA	NA	NA	NA	NA	NA	NA	NA	NA	NA	NA	NA	NA	NA	NA	NA	NA	NA	NA	NA	NA	NA	NA	NA	NA	NA	NA	NA	NA	NA	NA	NA	NA	NA	NA	NA	NA	NA	NA
Combined	Reactome	R-HSA-2408522	Selenoamino acid metabolism	14/542	96/5794	0.0615278	0.99999	EEF1E1/RPS21/RPL39/RPL22/RPS28/AIMP1/RPS29/RPL37/RPL36/RPS27L/RPL38/RPS27/RPL24/RPL37A	14	FALSE	4/161	96/6080	0.249266	0.912156	AIMP1/RPS29/RPL38/RPS27	4	FALSE	NA	NA	NA	NA	NA	NA	NA	15/452	96/5681	0.00828826	0.701695	RPS17/RPS21/RPS15A/RPL39/RPL22/RPS28/RPS29/RPL37/RPL36/RPS17/RPL38/RPS27/RPL6/RPL35A/RPL24/RPL37A	15	FALSE	16/522	96/5723	0.0124327	0.687591	EEF1E1/RPS21/RPL39/RPL22/RPS28/RPLP2/RPL34/RPS29/RPL37/RPL36/RPL38/RPS27/RPL41/RPL35A/RPL24/RPL37A	16	FALSE	7/122	96/5478	0.00529567	0.955122	EEF1E1/RPL39/RPS29/RPL38/RPS27/RPL24/RPL37A	7	FALSE	21/328	96/5333	2.19884e-07	8.64692e-05
Combined	Reactome	R-HSA-2408557	Selenocysteine synthesis	12/542	86/5794	0.102832	0.99999	RPS21/RPL39/RPL22/RPS28/RPS29/RPL37/RPL36/RPS27L/RPL38/RPS27/RPL24/RPL37A	12	FALSE	3/161	86/6080	0.399395	0.912156	RPS29/RPL38/RPS27	3	FALSE	NA	NA	NA	NA	NA	NA	NA	15/452	86/5681	0.00287633	0.576977	RPS17/RPS21/RPS15A/RPL39/RPL22/RPS28/RPS29/RPL37/RPL36/RPS17/RPL38/RPS27/RPL6/RPL35A/RPL24/RPL37A	15	FALSE	15/522	86/5723	0.0101611	0.687591	RPS21/RPL39/RPL22/RPS28/RPLP2/RPL34/RPS29/RPL37/RPL36/RPL38/RPS27/RPL41/RPL35A/RPL24/RPL37A	15	FALSE	6/122	86/5478	0.0118963	0.955122	RPL39/RPS29/RPL38/RPS27/RPL24/RPL37A	6	FALSE	21/328	86/5333	2.85388e-08	2.21226e-05
Combined	Reactome	R-HSA-376176	Signaling by ROBO receptors	20/542	180/5794	0.238994	0.99999	RPS21/MAGOHB/RPL39/RPL22/MAGOH/RPS28/ELOC/RPS29/MYO9B/RPL37/RPL36/RPS27L/RPL38/RPS27/CLASP2/SEM1/SOS1/RPL24/RPL37A/CDC42	20	FALSE	4/161	181/6080	0.712452	0.928838	ELOC/RPS29/RPL38/RPS27	4	FALSE	NA	NA	NA	NA	NA	NA	NA	20/452	179/5681	0.0748362	0.919454	RPS17/RPS21/RPS15A/RPL39/RPL22/NCK1/RPS28/ELOC/RPS29/RPL37/RPL36/RPS17/RPL38/RPS27/CLASP2/SEM1/RPL6/NCBP2/RPL35A/RPL24/RPL37A	20	FALSE	22/522	179/5723	0.0899636	0.930377	RPS21/MAGOHB/RPL39/RPL22/RPS28/RPLP2/ELOC/RPL34/RPS29/RPL37/RPL36/ABL1/RPL38/RPS27/USP33/CLASP2/RPL41/SEM1/NCBP2/RPL35A/RPL24/RPL37A	22	FALSE	8/122	177/5478	0.0430086	0.978494	MAGOHB/RPL39/MAGOH/RPS29/RPL38/RPS27/RPL24/RPL37A	8	FALSE	25/328	176/5333	6.12811e-05	0.00850545
Combined	Reactome	R-HSA-422475	Axon guidance	37/542	333/5794	0.150065	0.99999	LIMK2/RPS21/RPS6KA5/MYL12B/PRNP/MAGOHB/SDC2/DPYSL3/TLN1/RPL39/RPL22/MAGOH/RPS28/ELOC/ARHGEF28/GSK3B/RPS29/MYO9B/RPL37/GAB1/RPL36/RPS27L/SPTAN1/RPL38/ARPC4/RPS27/MAPK14/CLASP2/SEM1/DLG1/SOS1/NRAS/RPL24/ARHGEF11/RPL37A/RHOC/CDC42	37	FALSE	9/161	336/6080	0.535709	0.912156	ROCK1/ELOC/PTK2/ARHGEF28/RPS29/SPTAN1/RPL38/RPS27/RHOC	9	FALSE	5/68	332/5908	0.334939	0.624249	ROCK1/ARHGEF28/MAP2K1/SPTAN1/RHOC	5	FALSE	26/452	330/5681	0.55284	0.999498	RPS17/RPS21/RPS15A/RPL39/RPL22/NCK1/DOCK1/RPS28/ELOC/GRB2/ARHGEF28/RPS29/RPL37/GAB1/RPL36/RPS17/RPL38/RPS27/CLASP2/SEM1/RPL6/NCBP2/RPL35A/RPL24/ARHGEF11/RPL37A/RHOC	26	FALSE	36/522	331/5723	0.14845	0.999605	LIMK2/MYO10/RPS21/MMP9/MYL12B/TIAM1/MAGOHB/RPL39/RPL22/RPS28/ITGB1/RPLP2/ELOC/GRB2/RPL34/RPS29/DNM2/RPL37/GAB1/RPL36/SPTAN1/ABL1/DNM1/RPL38/RPS27/USP33/MAPK14/CLASP2/RPL41/SEM1/NCBP2/RPL35A/RPL24/ARHGEF11/RPL37A/RHOC	36	FALSE	12/122	314/5478	0.0458574	0.978494	MYL12B/MAGOHB/RPL39/MAGOH/VAV3/RPS29/RPL38/RPS27/RPL24/ARHGEF11/RPL37A/RHOC	12	FALSE	39/328	311/5333	1.11659e-05	0.00175639
Combined	Reactome	R-HSA-5660526	Response to metal ions	NA	NA	NA	NA	NA	NA	NA	2/161	10/6080	0.0272742	0.912156	MT1H/MT1G	2	FALSE	NA	NA	NA	NA	NA	NA	NA	4/452	10/5681	0.00563659	0.643184	MT1E/MT1A/MTF1/MT1G	4	FALSE	NA	NA	NA	NA	NA	NA	NA	NA	NA	NA	NA	NA	NA	NA	8/328	10/5333	7.61523e-09	1.79681e-05
Combined	Reactome	R-HSA-5663205	Infectious disease	NA	NA	NA	NA	NA	NA	NA	NA	NA	NA	NA	NA	NA	NA	NA	NA	NA	NA	NA	NA	NA	NA	NA	NA	NA	NA	NA	NA	NA	NA	NA	NA	NA	NA	NA	NA	NA	NA	NA	NA	NA	NA	NA	NA	NA	NA
Combined	Reactome	R-HSA-6791226	Major pathway of rRNA processing in the nucleolus and cytosol	19/542	172/5794	0.254402	0.99999	UTP4/RPS21/UTP4/RPL39/RPL22/PNO1/EXOSC6/RPS28/NIP7/DCAF13/DDX21/RPS29/RPL37/RPL36/RPS27L/RPL38/RPS27/C1D/RPL24/RPL37A	19	FALSE	7/161	173/6080	0.174175	0.912156	PNO1/NIP7/DCAF13/DDX21/RPS29/RPL38/RPS27	7	FALSE	2/68	173/5908	0.597147	0.752194	PNO1/DCAF13	2	FALSE	18/452	169/5681	0.123079	0.999498	RPS17/RPS21/MTREX/RPS15A/RPL39/RPL22/RPS28/DCAF13/RPS29/RPL37/RPL36/RPS17/RPL38/RPS27/C1D/RPL6/RPL35A/RPL24/RPL37A	18	FALSE	23/522	172/5723	0.0387249	0.847261	RPS21/RPL39/RPL22/PNO1/UTP11/RPS28/RPLP2/BYSL/DCAF13/DDX21/RPL34/RPS29/RPL37/RPL36/RPL38/RPS27/C1D/RPL41/NOP58/RPL35A/EXOSC7/RPL24/RPL37A	23	FALSE	11/122	169/5478	0.00125524	0.60829	RPL39/NIP7/DCAF13/RPS29/RPL38/RPS27/C1D/EMG1/GNL3/RPL24/RPL37A	11	FALSE	23/328	168/5333	0.000213035	0.0271706
Combined	Reactome	R-HSA-71291	Metabolism of amino acids and derivatives	25/542	237/5794	0.290851	0.99999	EEF1E1/RPS21/DHTKD1/MPST/RPL39/ASRGL1/SERINC2/RPL22/RPS28/HIBADH/AIMP1/RPS29/RPL37/RPL36/RPS27L/RPL38/RPS27/CHDH/APIP/MCCC1/SEM1/CSAD/RPL24/RPL37A/GLS	25	FALSE	8/161	240/6080	0.302927	0.912156	MPST/RIMKLB/ASRGL1/AIMP1/RPS29/RPL38/RPS27/CHDH	8	FALSE	2/68	240/5908	0.770531	0.845208	SERINC2/CHDH	2	FALSE	23/452	233/5681	0.163044	0.999498	RPS17/RPS21/MPST/RPS15A/RIMKLB/RPL39/ASRGL1/RPL22/AMD1/RPS28/CKB/RPS29/RPL37/SLC36A4/RPL36/RPS17/RPL38/RPS27/SEM1/RPL6/RPL35A/RPL24/RPL37A/KYNU	23	FALSE	30/522	233/5723	0.0320601	0.802418	EEF1E1/RPS21/DHTKD1/TMLHE/BCAT1/RPL39/ASRGL1/SERINC2/SMS/RPL22/RPS28/CKB/HIBADH/RPLP2/RPL34/RPS29/IVD/RPL37/OAZ2/RPL36/RPL38/RPS27/SDSL/NQO1/RPL41/SEM1/CSAD/RPL35A/RPL24/RPL37A	30	FALSE	9/122	228/5478	0.0668386	0.978494	EEF1E1/MPST/RPL39/SERINC2/RPS29/RPL38/RPS27/RPL24/RPL37A	9	FALSE	28/328	229/5333	0.000318518	0.0395549
Combined	Reactome	R-HSA-72312	rRNA processing	20/542	191/5794	0.330352	0.99999	UTP4/RPS21/UTP4/RPL39/RPL22/PNO1/EXOSC6/RPS28/NIP7/DCAF13/DDX21/GAR1/RPS29/RPL37/RPL36/RPS27L/RPL38/RPS27/C1D/RPL24/RPL37A	20	FALSE	8/161	192/6080	0.136144	0.912156	PNO1/NIP7/DCAF13/DDX21/GAR1/RPS29/RPL38/RPS27	8	FALSE	2/68	192/5908	0.654351	0.787118	PNO1/DCAF13	2	FALSE	18/452	188/5681	0.237181	0.999498	RPS17/RPS21/MTREX/RPS15A/RPL39/RPL22/RPS28/DCAF13/RPS29/RPL37/RPL36/RPS17/RPL38/RPS27/C1D/RPL6/RPL35A/RPL24/RPL37A	18	FALSE	23/522	191/5723	0.100225	0.930377	RPS21/RPL39/RPL22/PNO1/UTP11/RPS28/RPLP2/BYSL/DCAF13/DDX21/RPL34/RPS29/RPL37/RPL36/RPL38/RPS27/C1D/RPL41/NOP58/RPL35A/EXOSC7/RPL24/RPL37A	23	FALSE	12/122	188/5478	0.000894471	0.60829	RPL39/NIP7/DIMT1/DCAF13/RPS29/RPL38/RPS27/C1D/EMG1/GNL3/RPL24/RPL37A	12	FALSE	23/328	187/5333	0.00100568	0.098871
Combined	Reactome	R-HSA-72613	Eukaryotic Translation Initiation	15/542	113/5794	0.103581	0.99999	RPS21/RPL39/RPL22/RPS28/EIF3J/EIF4E/RPS29/EIF4B/RPL37/RPL36/RPS27L/RPL38/RPS27/RPL24/RPL37A	15	FALSE	4/161	114/6080	0.356989	0.912156	EIF3J/RPS29/RPL38/RPS27	4	FALSE	NA	NA	NA	NA	NA	NA	NA	17/452	113/5681	0.00751804	0.680383	RPS17/RPS21/RPS15A/RPL39/RPL22/RPS28/EIF1AX/EIF3J/RPS29/RPL37/RPL36/RPS17/RPL38/RPS27/RPL6/RPL35A/RPL24/RPL37A	17	FALSE	17/522	113/5723	0.0263153	0.759394	RPS21/RPL39/RPL22/RPS28/RPLP2/EIF3J/RPL34/EIF4E/RPS29/RPL37/RPL36/RPL38/RPS27/RPL41/RPL35A/RPL24/RPL37A	17	FALSE	7/122	113/5478	0.0125924	0.955122	EIF2B2/RPL39/RPS29/RPL38/RPS27/RPL24/RPL37A	7	FALSE	22/328	113/5333	9.61917e-07	0.000226964
Combined	Reactome	R-HSA-72649	Translation initiation complex formation	8/542	55/5794	0.137644	0.99999	RPS21/RPS28/EIF3J/EIF4E/RPS29/EIF4B/RPS27L/RPS27	8	FALSE	3/161	56/6080	0.184474	0.912156	EIF3J/RPS29/RPS27	3	FALSE	NA	NA	NA	NA	NA	NA	NA	8/452	55/5681	0.0674363	0.919454	RPS17/RPS21/RPS15A/RPS28/EIF1AX/EIF3J/RPS29/RPS17/RPS27	8	FALSE	6/522	55/5723	0.386894	0.999955	RPS21/RPS28/EIF3J/EIF4E/RPS29/RPS27	6	FALSE	2/122	55/5478	0.347628	0.978494	RPS29/RPS27	2	FALSE	8/328	55/5333	0.0181304	0.611123
Combined	Reactome	R-HSA-72662	Activation of the mRNA upon binding of the cap-binding complex and eIFs, and subsequent binding to 43S	8/542	56/5794	0.148306	0.99999	RPS21/RPS28/EIF3J/EIF4E/RPS29/EIF4B/RPS27L/RPS27	8	FALSE	3/161	57/6080	0.191201	0.912156	EIF3J/RPS29/RPS27	3	FALSE	NA	NA	NA	NA	NA	NA	NA	8/452	56/5681	0.0734875	0.919454	RPS17/RPS21/RPS15A/RPS28/EIF1AX/EIF3J/RPS29/RPS17/RPS27	8	FALSE	6/522	56/5723	0.403758	0.999955	RPS21/RPS28/EIF3J/EIF4E/RPS29/RPS27	6	FALSE	2/122	56/5478	0.355759	0.978494	RPS29/RPS27	2	FALSE	8/328	56/5333	0.0200606	0.633046
Combined	Reactome	R-HSA-72689	Formation of a pool of free 40S subunits	13/542	95/5794	0.103564	0.99999	RPS21/RPL39/RPL22/RPS28/EIF3J/RPS29/RPL37/RPL36/RPS27L/RPL38/RPS27/RPL24/RPL37A	13	FALSE	4/161	96/6080	0.249266	0.912156	EIF3J/RPS29/RPL38/RPS27	4	FALSE	NA	NA	NA	NA	NA	NA	NA	17/452	95/5681	0.00115474	0.551022	RPS17/RPS21/RPS15A/RPL39/RPL22/RPS28/EIF1AX/EIF3J/RPS29/RPL37/RPL36/RPS17/RPL38/RPS27/RPL6/RPL35A/RPL24/RPL37A	17	FALSE	16/522	95/5723	0.0112777	0.687591	RPS21/RPL39/RPL22/RPS28/RPLP2/EIF3J/RPL34/RPS29/RPL37/RPL36/RPL38/RPS27/RPL41/RPL35A/RPL24/RPL37A	16	FALSE	6/122	95/5478	0.0187238	0.976339	RPL39/RPS29/RPL38/RPS27/RPL24/RPL37A	6	FALSE	22/328	95/5333	3.75039e-08	2.21226e-05
Combined	Reactome	R-HSA-72695	Formation of the ternary complex, and subsequently, the 43S complex	6/542	48/5794	0.290412	0.99999	RPS21/RPS28/EIF3J/RPS29/RPS27L/RPS27	6	FALSE	3/161	49/6080	0.139437	0.912156	EIF3J/RPS29/RPS27	3	FALSE	NA	NA	NA	NA	NA	NA	NA	8/452	48/5681	0.0337955	0.873135	RPS17/RPS21/RPS15A/RPS28/EIF1AX/EIF3J/RPS29/RPS17/RPS27	8	FALSE	5/522	48/5723	0.448281	0.999955	RPS21/RPS28/EIF3J/RPS29/RPS27	5	FALSE	2/122	48/5478	0.289953	0.978494	RPS29/RPS27	2	FALSE	8/328	48/5333	0.00815354	0.458054
Combined	Reactome	R-HSA-72702	Ribosomal scanning and start codon recognition	8/542	55/5794	0.137644	0.99999	RPS21/RPS28/EIF3J/EIF4E/RPS29/EIF4B/RPS27L/RPS27	8	FALSE	3/161	56/6080	0.184474	0.912156	EIF3J/RPS29/RPS27	3	FALSE	NA	NA	NA	NA	NA	NA	NA	8/452	55/5681	0.0674363	0.919454	RPS17/RPS21/RPS15A/RPS28/EIF1AX/EIF3J/RPS29/RPS17/RPS27	8	FALSE	6/522	55/5723	0.386894	0.999955	RPS21/RPS28/EIF3J/EIF4E/RPS29/RPS27	6	FALSE	2/122	55/5478	0.347628	0.978494	RPS29/RPS27	2	FALSE	8/328	55/5333	0.0181304	0.611123
Combined	Reactome	R-HSA-72706	GTP hydrolysis and joining of the 60S ribosomal subunit	15/542	106/5794	0.0673265	0.99999	RPS21/RPL39/RPL22/RPS28/EIF3J/EIF4E/RPS29/EIF4B/RPL37/RPL36/RPS27L/RPL38/RPS27/RPL24/RPL37A	15	FALSE	4/161	107/6080	0.314589	0.912156	EIF3J/RPS29/RPL38/RPS27	4	FALSE	NA	NA	NA	NA	NA	NA	NA	17/452	106/5681	0.0038907	0.603069	RPS17/RPS21/RPS15A/RPL39/RPL22/RPS28/EIF1AX/EIF3J/RPS29/RPL37/RPL36/RPS17/RPL38/RPS27/RPL6/RPL35A/RPL24/RPL37A	17	FALSE	17/522	106/5723	0.0147033	0.73439	RPS21/RPL39/RPL22/RPS28/RPLP2/EIF3J/RPL34/EIF4E/RPS29/RPL37/RPL36/RPL38/RPS27/RPL41/RPL35A/RPL24/RPL37A	17	FALSE	6/122	106/5478	0.0302169	0.978494	RPL39/RPS29/RPL38/RPS27/RPL24/RPL37A	6	FALSE	22/328	106/5333	3.00219e-07	0.000100309
Combined	Reactome	R-HSA-72737	Cap-dependent Translation Initiation	15/542	113/5794	0.103581	0.99999	RPS21/RPL39/RPL22/RPS28/EIF3J/EIF4E/RPS29/EIF4B/RPL37/RPL36/RPS27L/RPL38/RPS27/RPL24/RPL37A	15	FALSE	4/161	114/6080	0.356989	0.912156	EIF3J/RPS29/RPL38/RPS27	4	FALSE	NA	NA	NA	NA	NA	NA	NA	17/452	113/5681	0.00751804	0.680383	RPS17/RPS21/RPS15A/RPL39/RPL22/RPS28/EIF1AX/EIF3J/RPS29/RPL37/RPL36/RPS17/RPL38/RPS27/RPL6/RPL35A/RPL24/RPL37A	17	FALSE	17/522	113/5723	0.0263153	0.759394	RPS21/RPL39/RPL22/RPS28/RPLP2/EIF3J/RPL34/EIF4E/RPS29/RPL37/RPL36/RPL38/RPS27/RPL41/RPL35A/RPL24/RPL37A	17	FALSE	7/122	113/5478	0.0125924	0.955122	EIF2B2/RPL39/RPS29/RPL38/RPS27/RPL24/RPL37A	7	FALSE	22/328	113/5333	9.61917e-07	0.000226964
Combined	Reactome	R-HSA-72764	Eukaryotic Translation Termination	12/542	88/5794	0.116926	0.99999	RPS21/RPL39/RPL22/RPS28/RPS29/RPL37/RPL36/RPS27L/RPL38/RPS27/RPL24/RPL37A	12	FALSE	3/161	88/6080	0.413726	0.912156	RPS29/RPL38/RPS27	3	FALSE	NA	NA	NA	NA	NA	NA	NA	15/452	86/5681	0.00287633	0.576977	RPS17/RPS21/RPS15A/RPL39/RPL22/RPS28/RPS29/RPL37/RPL36/RPS17/RPL38/RPS27/RPL6/RPL35A/RPL24/RPL37A	15	FALSE	15/522	86/5723	0.0101611	0.687591	RPS21/RPL39/RPL22/RPS28/RPLP2/RPL34/RPS29/RPL37/RPL36/RPL38/RPS27/RPL41/RPL35A/RPL24/RPL37A	15	FALSE	6/122	86/5478	0.0118963	0.955122	RPL39/RPS29/RPL38/RPS27/RPL24/RPL37A	6	FALSE	21/328	87/5333	3.55392e-08	2.21226e-05
Combined	Reactome	R-HSA-72766	Translation	38/542	259/5794	0.00309567	0.397201	EEF1E1/MRPL36/RPS21/MTIF3/RPL39/SRP54/MRPL50/MRPL41/RPL22/SEC61G/SRP14/MRPL19/SPCS3/SRP19/RPS28/MRPL12/EIF3J/MRPL47/MRPS33/EIF4E/SEC61B/AIMP1/RPS29/EIF4B/RPL37/RPL36/RPS27L/MRPL30/MRPL51/RPL38/RPS27/SEC11A/MRPL42/MRPL20/SRP9/RPL24/RPL37A/MRPL33	38	FALSE	8/161	262/6080	0.391568	0.912156	MRPL50/SEC61G/EIF3J/AIMP1/RPS29/RPL38/RPS27/MRPL33	8	FALSE	3/68	259/5908	0.578765	0.747026	MRPL50/SEC61G/MRPL19	3	FALSE	29/452	256/5681	0.0318409	0.873135	RPS17/MRPL39/MRPL36/RPS21/MRPS28/RPS15A/RPL39/SRP54/RPL22/SEC61G/SRP14/MRPL19/RPS28/EIF1AX/EIF3J/SEC61B/RPS29/SSR2/RPL37/RPL36/RPS17/RPL38/RPS27/WARS2/RPL6/SRP9/RPL35A/RPL24/RPL37A/MRPL33	29	FALSE	33/522	257/5723	0.026288	0.759394	EEF1E1/RPS21/RPL39/MRPL50/MRPL41/RPL22/SEC61G/MRPL52/SPCS3/SRP19/RPS28/MRPL12/RPLP2/EIF3J/MRPL47/MRPS33/MRPS18C/RPL34/EIF4E/SEC61B/RPS29/SSR2/RPL37/RPL36/MRPL51/RPL38/RPS27/RPL41/SRP9/RPL35A/RPL24/RPL37A/MRPL33	33	FALSE	14/122	255/5478	0.00147082	0.60829	EEF1E1/MRPS30/EIF2B2/RPL39/MRPL50/MRPL47/MRPS18C/RPS29/MRPL51/RPL38/RPS27/RPL24/RPL37A/MRPL33	14	FALSE	30/328	256/5333	0.000410006	0.0496107
Combined	Reactome	R-HSA-8868773	rRNA processing in the nucleus and cytosol	20/542	182/5794	0.254785	0.99999	UTP4/RPS21/UTP4/RPL39/RPL22/PNO1/EXOSC6/RPS28/NIP7/DCAF13/DDX21/GAR1/RPS29/RPL37/RPL36/RPS27L/RPL38/RPS27/C1D/RPL24/RPL37A	20	FALSE	8/161	183/6080	0.111683	0.912156	PNO1/NIP7/DCAF13/DDX21/GAR1/RPS29/RPL38/RPS27	8	FALSE	2/68	183/5908	0.62808	0.771608	PNO1/DCAF13	2	FALSE	18/452	179/5681	0.178321	0.999498	RPS17/RPS21/MTREX/RPS15A/RPL39/RPL22/RPS28/DCAF13/RPS29/RPL37/RPL36/RPS17/RPL38/RPS27/C1D/RPL6/RPL35A/RPL24/RPL37A	18	FALSE	23/522	182/5723	0.0660722	0.924015	RPS21/RPL39/RPL22/PNO1/UTP11/RPS28/RPLP2/BYSL/DCAF13/DDX21/RPL34/RPS29/RPL37/RPL36/RPL38/RPS27/C1D/RPL41/NOP58/RPL35A/EXOSC7/RPL24/RPL37A	23	FALSE	12/122	179/5478	0.000577419	0.60829	RPL39/NIP7/DIMT1/DCAF13/RPS29/RPL38/RPS27/C1D/EMG1/GNL3/RPL24/RPL37A	12	FALSE	23/328	178/5333	0.000500508	0.0559816
Combined	Reactome	R-HSA-8953854	Metabolism of RNA	NA	NA	NA	NA	NA	NA	NA	NA	NA	NA	NA	NA	NA	NA	NA	NA	NA	NA	NA	NA	NA	NA	NA	NA	NA	NA	NA	NA	NA	NA	NA	NA	NA	NA	NA	NA	NA	NA	NA	NA	NA	NA	NA	NA	NA	NA
Combined	Reactome	R-HSA-8953897	Cellular responses to stimuli	NA	NA	NA	NA	NA	NA	NA	NA	NA	NA	NA	NA	NA	NA	NA	NA	NA	NA	NA	NA	NA	NA	NA	NA	NA	NA	NA	NA	NA	NA	NA	NA	NA	NA	NA	NA	NA	NA	NA	NA	NA	NA	NA	NA	NA	NA
Combined	Reactome	R-HSA-9010553	Regulation of expression of SLITs and ROBOs	16/542	151/5794	0.33727	0.99999	RPS21/MAGOHB/RPL39/RPL22/MAGOH/RPS28/ELOC/RPS29/RPL37/RPL36/RPS27L/RPL38/RPS27/SEM1/RPL24/RPL37A	16	FALSE	4/161	151/6080	0.571286	0.912156	ELOC/RPS29/RPL38/RPS27	4	FALSE	NA	NA	NA	NA	NA	NA	NA	18/452	149/5681	0.0477432	0.915138	RPS17/RPS21/RPS15A/RPL39/RPL22/RPS28/ELOC/RPS29/RPL37/RPL36/RPS17/RPL38/RPS27/SEM1/RPL6/NCBP2/RPL35A/RPL24/RPL37A	18	FALSE	20/522	150/5723	0.052794	0.900836	RPS21/MAGOHB/RPL39/RPL22/RPS28/RPLP2/ELOC/RPL34/RPS29/RPL37/RPL36/RPL38/RPS27/USP33/RPL41/SEM1/NCBP2/RPL35A/RPL24/RPL37A	20	FALSE	8/122	149/5478	0.0175318	0.975396	MAGOHB/RPL39/MAGOH/RPS29/RPL38/RPS27/RPL24/RPL37A	8	FALSE	24/328	149/5333	1.0299e-05	0.00173575
Combined	Reactome	R-HSA-927802	Nonsense-Mediated Decay (NMD)	15/542	110/5794	0.0868177	0.99999	RPS21/MAGOHB/RPL39/RPL22/MAGOH/RPS28/RPS29/RPL37/RPL36/RPS27L/RPL38/RPS27/PPP2R1A/RPL24/RPL37A	15	FALSE	3/161	110/6080	0.561716	0.912156	RPS29/RPL38/RPS27	3	FALSE	NA	NA	NA	NA	NA	NA	NA	17/452	108/5681	0.00473529	0.621388	RPS17/RPS21/RPS15A/RPL39/RPL22/RPS28/RPS29/RPL37/RPL36/RPS17/RPL38/RPS27/RPL6/NCBP2/RPL35A/RPL24/PNRC2/RPL37A	17	FALSE	17/522	109/5723	0.0190532	0.73439	RPS21/MAGOHB/RPL39/RPL22/RPS28/RPLP2/RPL34/RPS29/RPL37/RPL36/RPL38/RPS27/RPL41/NCBP2/RPL35A/RPL24/RPL37A	17	FALSE	8/122	109/5478	0.00279317	0.762518	MAGOHB/RPL39/MAGOH/RPS29/RPL38/RPS27/RPL24/RPL37A	8	FALSE	21/328	109/5333	2.04425e-06	0.00040195
Combined	Reactome	R-HSA-9633012	Response of EIF2AK4 (GCN2) to amino acid deficiency	12/542	94/5794	0.165418	0.99999	RPS21/RPL39/RPL22/RPS28/RPS29/RPL37/RPL36/RPS27L/RPL38/RPS27/RPL24/RPL37A	12	FALSE	3/161	94/6080	0.456023	0.912156	RPS29/RPL38/RPS27	3	FALSE	NA	NA	NA	NA	NA	NA	NA	15/452	94/5681	0.00681862	0.680383	RPS17/RPS21/RPS15A/RPL39/RPL22/RPS28/RPS29/RPL37/RPL36/RPS17/RPL38/RPS27/RPL6/RPL35A/RPL24/RPL37A	15	FALSE	16/522	94/5723	0.010209	0.687591	RPS21/EIF2AK4/RPL39/RPL22/RPS28/RPLP2/RPL34/RPS29/RPL37/RPL36/RPL38/RPS27/RPL41/RPL35A/RPL24/RPL37A	16	FALSE	6/122	94/5478	0.017857	0.975396	RPL39/RPS29/RPL38/RPS27/RPL24/RPL37A	6	FALSE	21/328	94/5333	1.49933e-07	6.43213e-05
Combined	Reactome	R-HSA-9675108	Nervous system development	37/542	344/5794	0.202597	0.99999	LIMK2/RPS21/RPS6KA5/MYL12B/PRNP/MAGOHB/SDC2/DPYSL3/TLN1/RPL39/RPL22/MAGOH/RPS28/ELOC/ARHGEF28/GSK3B/RPS29/MYO9B/RPL37/GAB1/RPL36/RPS27L/SPTAN1/RPL38/ARPC4/RPS27/MAPK14/CLASP2/SEM1/DLG1/SOS1/NRAS/RPL24/ARHGEF11/RPL37A/RHOC/CDC42	37	FALSE	10/161	349/6080	0.445636	0.912156	ROCK1/SREBF2/ELOC/PTK2/ARHGEF28/RPS29/SPTAN1/RPL38/RPS27/RHOC	10	FALSE	5/68	344/5908	0.362809	0.636532	ROCK1/ARHGEF28/MAP2K1/SPTAN1/RHOC	5	FALSE	26/452	342/5681	0.629281	0.999498	RPS17/RPS21/RPS15A/RPL39/RPL22/NCK1/DOCK1/RPS28/ELOC/GRB2/ARHGEF28/RPS29/RPL37/GAB1/RPL36/RPS17/RPL38/RPS27/CLASP2/SEM1/RPL6/NCBP2/RPL35A/RPL24/ARHGEF11/RPL37A/RHOC	26	FALSE	37/522	343/5723	0.156465	0.999955	LIMK2/MYO10/RPS21/MMP9/MYL12B/TIAM1/MAGOHB/RPL39/RPL22/RPS28/ITGB1/RPLP2/ELOC/GRB2/EGR2/RPL34/RPS29/DNM2/RPL37/GAB1/RPL36/SPTAN1/ABL1/DNM1/RPL38/RPS27/USP33/MAPK14/CLASP2/RPL41/SEM1/NCBP2/RPL35A/RPL24/ARHGEF11/RPL37A/RHOC	37	FALSE	13/122	325/5478	0.027903	0.978494	MYL12B/MAGOHB/RPL39/MAGOH/VAV3/EGR2/RPS29/RPL38/RPS27/RPL24/ARHGEF11/RPL37A/RHOC	13	FALSE	40/328	322/5333	1.07435e-05	0.00174823
Combined	Reactome	R-HSA-9711097	Cellular response to starvation	17/542	140/5794	0.158141	0.99999	RPS21/RPL39/RPL22/LAMTOR3/RPS28/SZT2/ATP6V0C/RHEB/RPS29/RPL37/SESN1/RPL36/RPS27L/RPL38/RPS27/RPL24/RPL37A	17	FALSE	3/161	142/6080	0.731893	0.93584	RPS29/RPL38/RPS27	3	FALSE	NA	NA	NA	NA	NA	NA	NA	19/452	138/5681	0.0124845	0.761993	RPS17/RPS21/RPS15A/RPL39/RPL22/RPS28/ATP6V0C/BMT2/RHEB/FNIP1/RPS29/RPL37/RPL36/RPS17/RPL38/RPS27/RPL6/RPL35A/RPL24/RPL37A	19	FALSE	20/522	137/5723	0.0228115	0.759394	RPS21/EIF2AK4/RPL39/RPL22/FLCN/RPS28/SZT2/RPLP2/ATP6V0C/RHEB/RPL34/RPS29/RPL37/RPL36/RPL38/RPS27/RPL41/RPL35A/RPL24/RPL37A	20	FALSE	6/122	137/5478	0.0842824	0.978494	RPL39/RPS29/RPL38/RPS27/RPL24/RPL37A	6	FALSE	22/328	138/5333	2.86636e-05	0.00436334
Combined	Reactome	R-HSA-9735869	SARS-CoV-1 modulates host translation machinery	5/542	34/5794	0.207974	0.99999	RPS21/RPS28/RPS29/RPS27L/RPS27	5	FALSE	2/161	34/6080	0.226989	0.912156	RPS29/RPS27	2	FALSE	NA	NA	NA	NA	NA	NA	NA	6/452	34/5681	0.0489731	0.915138	RPS17/RPS21/RPS15A/RPS28/RPS29/RPS17/RPS27	6	FALSE	4/522	34/5723	0.376372	0.999955	RPS21/RPS28/RPS29/RPS27	4	FALSE	2/122	34/5478	0.174623	0.978494	RPS29/RPS27	2	FALSE	7/328	34/5333	0.0039653	0.27518
Combined	Reactome	R-HSA-9754678	SARS-CoV-2 modulates host translation machinery	10/542	45/5794	0.00743085	0.609444	RPS21/SNRPD1/RPS28/SNRPD2/SNRPE/RPS29/RPS27L/SNRPG/RPS27/SNRPF	10	FALSE	4/161	47/6080	0.0349723	0.912156	SNRPD1/RPS29/RPS27/SNRPF	4	FALSE	NA	NA	NA	NA	NA	NA	NA	7/452	45/5681	0.0627246	0.919454	RPS17/RPS21/RPS15A/RPS28/RPS29/RPS17/RPS27/SNRPF	7	FALSE	8/522	46/5723	0.053817	0.900836	RPS21/SNRPD1/RPS28/SNRPE/RPS29/SNRPG/RPS27/SNRPF	8	FALSE	2/122	45/5478	0.265008	0.978494	RPS29/RPS27	2	FALSE	9/328	45/5333	0.00139044	0.126182
Combined	Reactome	R-HSA-975634	Retinoid metabolism and transport	4/542	17/5794	0.0675294	0.99999	SDC2/SDC3/APOC2/RETSAT	4	FALSE	1/161	17/6080	0.366719	0.912156	RETSAT	1	FALSE	1/68	16/5908	0.16928	0.60283	RETSAT	1	FALSE	3/452	17/5681	0.14824	0.999498	LPL/APOC2/RETSAT	3	FALSE	2/522	15/5723	0.403322	0.999955	LRP12/RETSAT	2	FALSE	1/122	15/5478	0.287002	0.978494	RETSAT	1	FALSE	6/328	15/5333	0.000161056	0.0211118
Combined	Reactome	R-HSA-975956	Nonsense Mediated Decay (NMD) independent of the Exon Junction Complex (EJC)	12/542	90/5794	0.132073	0.99999	RPS21/RPL39/RPL22/RPS28/RPS29/RPL37/RPL36/RPS27L/RPL38/RPS27/RPL24/RPL37A	12	FALSE	3/161	90/6080	0.42795	0.912156	RPS29/RPL38/RPS27	3	FALSE	NA	NA	NA	NA	NA	NA	NA	16/452	89/5681	0.00152093	0.576977	RPS17/RPS21/RPS15A/RPL39/RPL22/RPS28/RPS29/RPL37/RPL36/RPS17/RPL38/RPS27/RPL6/NCBP2/RPL35A/RPL24/RPL37A	16	FALSE	16/522	89/5723	0.00600622	0.675902	RPS21/RPL39/RPL22/RPS28/RPLP2/RPL34/RPS29/RPL37/RPL36/RPL38/RPS27/RPL41/NCBP2/RPL35A/RPL24/RPL37A	16	FALSE	6/122	89/5478	0.0139353	0.955122	RPL39/RPS29/RPL38/RPS27/RPL24/RPL37A	6	FALSE	21/328	89/5333	5.45245e-08	2.57301e-05
Combined	Reactome	R-HSA-975957	Nonsense Mediated Decay (NMD) enhanced by the Exon Junction Complex (EJC)	15/542	110/5794	0.0868177	0.99999	RPS21/MAGOHB/RPL39/RPL22/MAGOH/RPS28/RPS29/RPL37/RPL36/RPS27L/RPL38/RPS27/PPP2R1A/RPL24/RPL37A	15	FALSE	3/161	110/6080	0.561716	0.912156	RPS29/RPL38/RPS27	3	FALSE	NA	NA	NA	NA	NA	NA	NA	17/452	108/5681	0.00473529	0.621388	RPS17/RPS21/RPS15A/RPL39/RPL22/RPS28/RPS29/RPL37/RPL36/RPS17/RPL38/RPS27/RPL6/NCBP2/RPL35A/RPL24/PNRC2/RPL37A	17	FALSE	17/522	109/5723	0.0190532	0.73439	RPS21/MAGOHB/RPL39/RPL22/RPS28/RPLP2/RPL34/RPS29/RPL37/RPL36/RPL38/RPS27/RPL41/NCBP2/RPL35A/RPL24/RPL37A	17	FALSE	8/122	109/5478	0.00279317	0.762518	MAGOHB/RPL39/MAGOH/RPS29/RPL38/RPS27/RPL24/RPL37A	8	FALSE	21/328	109/5333	2.04425e-06	0.00040195
More in resister	GO	GO:0000028	ribosomal small subunit assembly	4/419	16/8530	0.00651802	0.246141	RPS27/RPL38/RPS27L/RPS28	4	FALSE	2/130	16/9003	0.0217518	0.604909	RPL38/RPS27	2	FALSE	NA	NA	NA	NA	NA	NA	NA	3/275	16/8351	0.01439	0.253471	RPL38/RPS27/RPS28	3	FALSE	3/348	16/8398	0.0264418	0.374712	RPL38/RPS27/RPS28	3	FALSE	2/125	16/8059	0.0248483	0.600652	RPL38/RPS27	2	FALSE	3/221	16/7787	0.0096081	0.297165
More in resister	GO	GO:0000375	RNA splicing, via transesterification reactions	27/419	262/8530	0.000202116	0.0310753	PPIL3/HNRNPH1/SNRPB2/SNRPF/LSM5/SRSF3/PRPF38A/SYNCRIP/ALYREF/TRA2B/SRSF6/SNRPD1/SNRPE/C1QBP/LSM8/SNRNP27/UBL5/LSM7/WDR77/SYF2/MAGOHB/SF3A2/SNRPG/SF3B6/MAGOH/LSM3/SNRPD2	27	TRUE	5/130	264/9003	0.333622	0.809563	C1QBP/SNRPF/SNRPD1/PRPF38A/PPIL3	5	FALSE	1/61	263/8729	0.846291	0.881017	C1QBP	1	FALSE	10/275	259/8351	0.34867	0.773562	PRPF38A/HNRNPH1/PPIL3/UBL5/SYF2/NCBP2/SNRPF/DDX5/SNRNP27/TRA2B	10	FALSE	18/348	262/8398	0.0241683	0.364168	ALYREF/HNRNPH1/U2AF2/SNRPG/SNRPE/C1QBP/PPIL3/SNRPF/UBL5/SF3B4/LSM7/TRA2B/SNRPB2/NCBP2/SNRPD1/MAGOHB/SF3A2/SF3B6	18	FALSE	6/125	257/8059	0.208837	0.949037	PPIL3/MAGOHB/HNRNPH1/MAGOH/SF3B4/SNRNP40	6	FALSE	8/221	255/7787	0.437578	0.962874
More in resister	GO	GO:0000377	RNA splicing, via transesterification reactions with bulged adenosine as nucleophile	27/419	258/8530	0.000156627	0.0259338	PPIL3/HNRNPH1/SNRPB2/SNRPF/LSM5/SRSF3/PRPF38A/SYNCRIP/ALYREF/TRA2B/SRSF6/SNRPD1/SNRPE/C1QBP/LSM8/SNRNP27/UBL5/LSM7/WDR77/SYF2/MAGOHB/SF3A2/SNRPG/SF3B6/MAGOH/LSM3/SNRPD2	27	TRUE	5/130	260/9003	0.322172	0.809563	C1QBP/SNRPF/SNRPD1/PRPF38A/PPIL3	5	FALSE	1/61	259/8729	0.841782	0.878648	C1QBP	1	FALSE	10/275	255/8351	0.331082	0.773562	PRPF38A/HNRNPH1/PPIL3/UBL5/SYF2/NCBP2/SNRPF/DDX5/SNRNP27/TRA2B	10	FALSE	18/348	258/8398	0.0210696	0.339413	ALYREF/HNRNPH1/U2AF2/SNRPG/SNRPE/C1QBP/PPIL3/SNRPF/UBL5/SF3B4/LSM7/TRA2B/SNRPB2/NCBP2/SNRPD1/MAGOHB/SF3A2/SF3B6	18	FALSE	6/125	253/8059	0.199131	0.949037	PPIL3/MAGOHB/HNRNPH1/MAGOH/SF3B4/SNRNP40	6	FALSE	8/221	251/7787	0.420169	0.962874
More in resister	GO	GO:0000398	mRNA splicing, via spliceosome	27/419	258/8530	0.000156627	0.0259338	PPIL3/HNRNPH1/SNRPB2/SNRPF/LSM5/SRSF3/PRPF38A/SYNCRIP/ALYREF/TRA2B/SRSF6/SNRPD1/SNRPE/C1QBP/LSM8/SNRNP27/UBL5/LSM7/WDR77/SYF2/MAGOHB/SF3A2/SNRPG/SF3B6/MAGOH/LSM3/SNRPD2	27	TRUE	5/130	260/9003	0.322172	0.809563	C1QBP/SNRPF/SNRPD1/PRPF38A/PPIL3	5	FALSE	1/61	259/8729	0.841782	0.878648	C1QBP	1	FALSE	10/275	255/8351	0.331082	0.773562	PRPF38A/HNRNPH1/PPIL3/UBL5/SYF2/NCBP2/SNRPF/DDX5/SNRNP27/TRA2B	10	FALSE	18/348	258/8398	0.0210696	0.339413	ALYREF/HNRNPH1/U2AF2/SNRPG/SNRPE/C1QBP/PPIL3/SNRPF/UBL5/SF3B4/LSM7/TRA2B/SNRPB2/NCBP2/SNRPD1/MAGOHB/SF3A2/SF3B6	18	FALSE	6/125	253/8059	0.199131	0.949037	PPIL3/MAGOHB/HNRNPH1/MAGOH/SF3B4/SNRNP40	6	FALSE	8/221	251/7787	0.420169	0.962874
More in resister	GO	GO:0000470	maturation of LSU-rRNA	5/419	28/8530	0.010758	0.34562	RRP15/EIF6/RPF2/RPF1/NIFK	5	FALSE	5/130	28/9003	4.37456e-05	0.0219603	RRP15/NIFK/EIF6/RPF2/MAK16	5	TRUE	4/61	28/8729	3.89841e-05	0.0184607	RRP15/EIF6/MAK16/URB1	4	FALSE	2/275	27/8351	0.222728	0.743531	GTPBP4/EIF6	2	FALSE	4/348	28/8398	0.0270303	0.374712	EIF6/RRP15/MAK16/DDX18	4	FALSE	3/125	27/8059	0.00812008	0.319046	EIF6/RRP15/RPF2	3	FALSE	5/221	27/7787	0.000852564	0.0447467
More in resister	GO	GO:0001510	RNA methylation	13/419	80/8530	0.000125055	0.0224317	SNRPF/RNMT/METTL1/SNRPD1/SNRPE/CBLL1/RAMAC/TFB2M/TRMT61A/METTL5/SNRPG/NSUN5/SNRPD2	13	TRUE	3/130	80/9003	0.108832	0.809563	SNRPF/SNRPD1/METTL1	3	FALSE	2/61	80/8729	0.107451	0.530843	TRMT61A/TFB2M	2	FALSE	2/275	75/8351	0.712942	0.877357	SNRPF/RAMAC	2	FALSE	6/348	77/8398	0.099029	0.680382	RAMAC/METTL1/SNRPG/SNRPE/SNRPF/SNRPD1	6	FALSE	4/125	75/8059	0.0288085	0.62491	RAMAC/METTL2B/DIMT1/EMG1	4	FALSE	4/221	74/7787	0.158065	0.962874
More in resister	GO	GO:0002181	cytoplasmic translation	14/419	148/8530	0.0138605	0.408667	EIF3J/RPL39/RPS29/RPS27/RPL38/RPS21/MCTS1/SYNCRIP/RPL37/RPL24/RPL37A/RPL36/RPS28/RPL22	14	FALSE	4/130	149/9003	0.168595	0.809563	EIF3J/RPS29/RPL38/RPS27	4	FALSE	NA	NA	NA	NA	NA	NA	NA	18/275	147/8351	1.40861e-06	0.000303461	RPS29/RPL39/RPL38/RPS27/RPS21/RPL37A/RPL37/RPL36/RPS17/RPS28/NCBP2/RPL6/EIF3J/RPL35A/YTHDF2/RPL24/RPL22/RPS15A	18	TRUE	17/348	147/8398	0.000115987	0.01117	RPS29/RPL38/RPS27/RPL39/RPS21/RPS28/RPL36/RPL37A/EIF3J/RPL37/RPL22/RPL41/RPL24/NCBP2/RPL34/RPL35A/RPLP2	17	TRUE	6/125	147/8059	0.0265272	0.621826	RPS29/RPL38/RPS27/RPL37A/RPL39/RPL24	6	FALSE	23/221	147/7787	1.68595e-11	2.80982e-09
More in resister	GO	GO:0002548	monocyte chemotaxis	3/419	28/8530	0.156442	0.999986	CCL3/DUSP1/IL6R	3	FALSE	NA	NA	NA	NA	NA	NA	NA	NA	NA	NA	NA	NA	NA	NA	6/275	28/8351	0.000246769	0.0192243	DUSP1/IL6/CCL3L1/IL6R/CCL3/ANXA1	6	TRUE	3/348	30/8398	0.126033	0.729553	CCL3/CCL3L1/IL6R	3	FALSE	NA	NA	NA	NA	NA	NA	NA	2/221	25/7787	0.157435	0.962874
More in resister	GO	GO:0002690	positive regulation of leukocyte chemotaxis	5/419	52/8530	0.110478	0.999986	CSF1/CCL3/EDN1/C1QBP/IL6R	5	FALSE	2/130	51/9003	0.167591	0.809563	C1QBP/PTK2	2	FALSE	1/61	53/8729	0.31119	0.60657	C1QBP	1	FALSE	7/275	53/8351	0.00163814	0.075664	IL6/EDN1/CSF1/IL6R/CXCL8/VEGFA/CCL3	7	FALSE	9/348	53/8398	0.000286161	0.0218568	CCL3/CXCL8/CSF1/TNFSF14/C1QBP/ZNF580/EDN1/RAC2/IL6R	9	TRUE	1/125	46/8059	0.513788	0.949037	CSF1	1	FALSE	5/221	47/7787	0.0102396	0.303163
More in resister	GO	GO:0006091	generation of precursor metabolites and energy	27/419	349/8530	0.012606	0.379503	COX17/SELENOS/NDUFB1/PHKG1/MTLN/PPP1CB/NDUFA3/ATP5ME/UQCC3/ATP5F1E/EIF6/NR4A3/SLC25A51/AOC2/CYCS/COX7B/ETFRF1/MT-ATP8/ALDOA/MT-ND2/UQCRB/ATP5MF/MT-ND4L/SDHAF2/CIAPIN1/GHITM/DYRK2	27	FALSE	7/130	360/9003	0.263872	0.809563	SELENOS/COX17/EIF6/PGD/NDUFB1/NR4A3/DYRK2	7	FALSE	5/61	358/8729	0.104105	0.530843	PDE12/SELENOS/EIF6/GHITM/COX17	5	FALSE	20/275	350/8351	0.0114386	0.230538	MYC/NDUFB1/NDUFA3/ATP5F1E/ATP5ME/SELENOS/COX7B/ALDOA/CYCS/COX17/NDUFA1/MT-ATP8/UQCRB/PPIF/PHLDA2/UQCRH/EIF6/ATP5MF/COX6C/COX7C	20	FALSE	26/348	351/8398	0.00283758	0.103997	SELENOS/COX17/EIF6/ATP5F1E/MTLN/NDUFB1/MT-ATP8/PRKAG2/GHITM/NDUFA3/ATP5MF/COX7A2/COX7B/UQCC3/NR4A3/ALDOA/ATP5ME/NDUFA1/NDUFC1/MTFR1L/UQCR11/MT-ND4L/PGD/COX7A2L/SDHAF2/PHLDA2	26	FALSE	5/125	339/8059	0.609671	0.949484	EIF6/SELENOS/CIAPIN1/CYCS/ATP5ME	5	FALSE	12/221	336/7787	0.245954	0.962874
More in resister	GO	GO:0006119	oxidative phosphorylation	15/419	126/8530	0.00125156	0.0738076	NDUFB1/NDUFA3/ATP5ME/UQCC3/ATP5F1E/SLC25A51/CYCS/COX7B/MT-ATP8/MT-ND2/UQCRB/ATP5MF/MT-ND4L/SDHAF2/GHITM	15	FALSE	1/130	126/9003	0.842068	0.931682	NDUFB1	1	FALSE	2/61	128/8729	0.225051	0.57516	PDE12/GHITM	2	FALSE	14/275	127/8351	6.96999e-05	0.00706689	NDUFB1/NDUFA3/ATP5F1E/ATP5ME/COX7B/CYCS/NDUFA1/MT-ATP8/UQCRB/PPIF/UQCRH/ATP5MF/COX6C/COX7C	14	TRUE	16/348	128/8398	7.23894e-05	0.00818517	ATP5F1E/NDUFB1/MT-ATP8/GHITM/NDUFA3/ATP5MF/COX7A2/COX7B/UQCC3/ATP5ME/NDUFA1/NDUFC1/UQCR11/MT-ND4L/COX7A2L/SDHAF2	16	TRUE	2/125	123/8059	0.572433	0.949037	CYCS/ATP5ME	2	FALSE	8/221	124/7787	0.024499	0.53374
More in resister	GO	GO:0006164	purine nucleotide biosynthetic process	13/419	170/8530	0.0749167	0.999986	NDUFB1/NDUFA3/ATP5ME/UQCC3/ATP5F1E/NCS1/ATP6V0C/MT-ATP8/ALDOA/HPRT1/MT-ND2/ATP5MF/MT-ND4L	13	FALSE	3/130	172/9003	0.454054	0.832657	NCS1/ACACA/NDUFB1	3	FALSE	NA	NA	NA	NA	NA	NA	NA	11/275	169/8351	0.0236853	0.333762	NDUFB1/NDUFA3/ATP5F1E/ATP5ME/ALDOA/NDUFA1/MT-ATP8/MPC2/DMAC2L/ATP6V0C/ATP5MF	11	FALSE	17/348	172/8398	0.000753764	0.0428099	ATP5F1E/NDUFB1/MT-ATP8/PRKAG2/NCS1/NDUFA3/ATP5MF/TGFB1/ATP6V0C/UQCC3/ALDOA/ATP5ME/NDUFA1/NDUFC1/HPRT1/MT-ND4L/MPC2	17	TRUE	1/125	164/8059	0.924992	0.98936	ATP5ME	1	FALSE	7/221	161/7787	0.173188	0.962874
More in resister	GO	GO:0006352	DNA-templated transcription initiation	14/419	112/8530	0.00111921	0.0715204	TAF11/GTF2A2/MED30/MED7/ELOC/TAF9/MED10/GTF2H5/MED31/MED16/TAF9B/TAF13/MED21/TFB2M	14	FALSE	6/130	114/9003	0.00604161	0.507482	GTF2A2/TAF11/MED30/MED7/TAF9B/ELOC	6	FALSE	7/61	114/8729	1.31292e-05	0.0103261	MED30/TFB2M/TAF9B/GTF2A2/MED7/GTF2H5/TAF13	7	TRUE	5/275	111/8351	0.302521	0.773562	ELOC/GTF2A2/SUB1/MED7/MED10	5	FALSE	13/348	113/8398	0.000766396	0.0429764	ELOC/GTF2A2/TAF11/MED31/TAF13/MED7/MED10/MED16/MED30/ERCC1/SUB1/TAF9B/TAF9	13	TRUE	5/125	111/8059	0.028842	0.62491	MED7/MED10/TAF11/MED31/MED16	5	FALSE	3/221	109/7787	0.602496	0.966282
More in resister	GO	GO:0006364	rRNA processing	22/419	208/8530	0.000544481	0.0571705	DCAF13/RRP15/RPS27/EIF6/RPS21/RPF2/GTF2H5/DDX21/BRIX1/C1D/RPF1/NIFK/RPS28/POP4/UTP4/TFB2M/METTL5/GAR1/ESF1/RPUSD3/NSUN5/EXOSC6	22	FALSE	10/130	210/9003	0.0008978	0.281685	DCAF13/RRP15/NIFK/EIF6/RPF2/MAK16/GAR1/DDX21/BRIX1/RPS27	10	FALSE	8/61	209/8729	9.349e-05	0.0184607	RRP15/DCAF13/EIF6/TFB2M/ESF1/MAK16/URB1/GTF2H5	8	TRUE	11/275	199/8351	0.0641974	0.47998	DCAF13/RPS27/RPS21/RPS17/RPS28/GTPBP4/C1D/RPL35A/YTHDF2/EIF6/WDR74	11	FALSE	17/348	206/8398	0.00518129	0.157213	RPS27/DCAF13/EIF6/RPS21/RRP15/MAK16/RPS28/DDX18/ESF1/POP4/DDX21/NOP58/UTP11/DDX27/C1D/RPL35A/BYSL	17	FALSE	8/125	199/8059	0.0120401	0.411646	DCAF13/EIF6/RPS27/DIMT1/RRP15/EMG1/C1D/RPF2	8	FALSE	12/221	199/7787	0.0109804	0.316968
More in resister	GO	GO:0006367	transcription initiation at RNA polymerase II promoter	12/419	80/8530	0.000486191	0.0550803	TAF11/GTF2A2/MED30/MED7/ELOC/TAF9/MED10/GTF2H5/MED31/MED16/TAF13/MED21	12	FALSE	5/130	82/9003	0.00653028	0.507482	GTF2A2/TAF11/MED30/MED7/ELOC	5	FALSE	5/61	82/8729	0.000254857	0.0250557	MED30/GTF2A2/MED7/GTF2H5/TAF13	5	TRUE	5/275	80/8351	0.123195	0.583947	ELOC/GTF2A2/SUB1/MED7/MED10	5	FALSE	12/348	82/8398	0.0001281	0.0115812	ELOC/GTF2A2/TAF11/MED31/TAF13/MED7/MED10/MED16/MED30/ERCC1/SUB1/TAF9	12	TRUE	5/125	80/8059	0.00788402	0.319046	MED7/MED10/TAF11/MED31/MED16	5	FALSE	3/221	79/7787	0.389759	0.962874
More in resister	GO	GO:0006412	translation	NA	NA	NA	NA	NA	NA	NA	NA	NA	NA	NA	NA	NA	NA	NA	NA	NA	NA	NA	NA	NA	NA	NA	NA	NA	NA	NA	NA	NA	NA	NA	NA	NA	NA	NA	NA	NA	NA	NA	NA	NA	NA	NA	NA	NA	NA
More in resister	GO	GO:0006518	peptide metabolic process	NA	NA	NA	NA	NA	NA	NA	NA	NA	NA	NA	NA	NA	NA	NA	NA	NA	NA	NA	NA	NA	NA	NA	NA	NA	NA	NA	NA	NA	NA	NA	NA	NA	NA	NA	NA	NA	NA	NA	NA	NA	NA	NA	NA	NA	NA
More in resister	GO	GO:0006633	fatty acid biosynthetic process	6/419	81/8530	0.206675	0.999986	MID1IP1/EIF6/APOC1/APOC2/EDN1/SCD	6	FALSE	2/130	81/9003	0.327061	0.809563	EIF6/ACACA	2	FALSE	1/61	77/8729	0.418621	0.651156	EIF6	1	FALSE	10/275	75/8351	0.000159216	0.0135074	FABP5/EDN1/APOC2/LPL/INSIG1/SCD/MID1IP1/EIF6/APOC1/ANXA1	10	TRUE	4/348	75/8398	0.377474	0.924659	EIF6/MID1IP1/PRKAG2/EDN1	4	FALSE	3/125	74/8059	0.107151	0.949037	EIF6/FABP5/MID1IP1	3	FALSE	5/221	71/7787	0.0505818	0.787358
More in resister	GO	GO:0006754	ATP biosynthetic process	11/419	92/8530	0.0052268	0.214299	NDUFB1/NDUFA3/ATP5ME/UQCC3/ATP5F1E/ATP6V0C/MT-ATP8/ALDOA/MT-ND2/ATP5MF/MT-ND4L	11	FALSE	1/130	92/9003	0.739458	0.903111	NDUFB1	1	FALSE	NA	NA	NA	NA	NA	NA	NA	10/275	92/8351	0.000847304	0.0479888	NDUFB1/NDUFA3/ATP5F1E/ATP5ME/ALDOA/NDUFA1/MT-ATP8/DMAC2L/ATP6V0C/ATP5MF	10	TRUE	14/348	94/8398	2.90107e-05	0.00428391	ATP5F1E/NDUFB1/MT-ATP8/PRKAG2/NDUFA3/ATP5MF/TGFB1/ATP6V0C/UQCC3/ALDOA/ATP5ME/NDUFA1/NDUFC1/MT-ND4L	14	TRUE	1/125	91/8059	0.760833	0.969496	ATP5ME	1	FALSE	5/221	90/7787	0.112118	0.962874
More in resister	GO	GO:0006882	cellular zinc ion homeostasis	NA	NA	NA	NA	NA	NA	NA	3/130	25/9003	0.00536391	0.507482	MT1H/SLC30A5/MT1G	3	FALSE	NA	NA	NA	NA	NA	NA	NA	3/275	25/8351	0.0476053	0.434921	MT1G/MT1A/MT1E	3	FALSE	NA	NA	NA	NA	NA	NA	NA	NA	NA	NA	NA	NA	NA	NA	7/221	24/7787	3.09317e-06	0.000243517
More in resister	GO	GO:0006959	humoral immune response	8/419	77/8530	0.0345292	0.678758	ROMO1/RPL39/CFD/CXCL2/CXCL3/C1QBP/LYZ/RNASE6	8	FALSE	2/130	75/9003	0.295052	0.809563	C1QBP/ROMO1	2	FALSE	1/61	78/8729	0.42272	0.651156	C1QBP	1	FALSE	9/275	75/8351	0.00074694	0.0453696	RPL39/IL6/CXCL2/RGCC/CXCL8/CXCL3/YTHDF2/ZP3/CFD	9	TRUE	11/348	77/8398	0.00030269	0.0223492	CD59/CXCL8/RPL39/ROMO1/PPP2R3C/C3/CFD/CXCL2/LYZ/C1QBP/CXCL3	11	TRUE	4/125	64/8059	0.0171336	0.506221	CD59/CFD/ROMO1/RPL39	4	FALSE	7/221	65/7787	0.0023189	0.106411
More in resister	GO	GO:0007005	mitochondrion organization	42/419	432/8530	1.46996e-05	0.00333062	HIGD1A/COX20/CTTN/ROMO1/PET100/COX17/COX16/NDUFB1/C12orf73/NDUFA3/UQCC3/NDUFAF2/TMEM126A/TRIAP1/TOMM5/SMIM4/STMP1/ARIH2/PDCD5/HEBP2/COX19/GGCT/EDN1/RHOU/NDUFAF4/WDR45B/UBL5/TIMM9/SH3GLB1/SSBP1/MT-ND2/TOMM22/INF2/TOMM7/MAP1LC3B/TIMM23/ATG12/BAP1/COA3/SDHAF2/TIMM10B/GHITM	42	TRUE	9/130	441/9003	0.186766	0.809563	HIGD1A/COX17/ROMO1/COX20/PET100/GRPEL2/NDUFAF4/NDUFB1/PDCD5	9	FALSE	7/61	438/8729	0.032161	0.526971	HIGD1A/C12orf73/COX20/TMEM126A/GHITM/TRIAP1/COX17	7	FALSE	22/275	421/8351	0.0212298	0.320917	PET100/NDUFB1/HIGD1A/NDUFA3/GGCT/TOMM5/EDN1/UBL5/COX17/NDUFA1/RHOU/MAP1LC3B/TOMM7/COX16/BLOC1S2/PPIF/SLIRP/WDR45B/MOAP1/GRPEL1/TMEM14A/UBE2D3	22	FALSE	35/348	425/8398	7.12307e-05	0.00818517	MMP9/PET100/COX17/HIGD1A/COX20/ROMO1/NDUFAF4/NDUFB1/GHITM/NDUFA3/TIMM10/HIGD2A/PDCD5/COX7A2/TOMM7/COX16/SLIRP/HEBP2/UQCC3/TIMM17A/ENDOG/UBL5/NDUFA1/NDUFC1/STMP1/MTFR1L/SMIM4/TOMM5/EDN1/TIMM8B/COX7A2L/MAP1LC3B/RAC2/SDHAF2/GGCT	35	TRUE	9/125	415/8059	0.194573	0.949037	PET100/HIGD1A/ROMO1/MAIP1/RHOU/TIMM17A/C12orf73/SMIM4/NDUFAF4	9	FALSE	18/221	411/7787	0.0438695	0.73086
More in resister	GO	GO:0008535	respiratory chain complex IV assembly	9/419	29/8530	6.35566e-06	0.0021047	COX20/PET100/COX17/COX16/C12orf73/SMIM4/STMP1/COX19/COA3	9	TRUE	3/130	29/9003	0.00817187	0.507482	COX17/COX20/PET100	3	FALSE	3/61	29/8729	0.00104256	0.0655979	C12orf73/COX20/COX17	3	FALSE	3/275	29/8351	0.0687768	0.488726	PET100/COX17/COX16	3	FALSE	6/348	29/8398	0.00102488	0.0534141	PET100/COX17/COX20/COX16/STMP1/SMIM4	6	FALSE	3/125	28/8059	0.00899291	0.342417	PET100/C12orf73/SMIM4	3	FALSE	5/221	28/7787	0.00101422	0.0516654
More in resister	GO	GO:0009060	aerobic respiration	15/419	165/8530	0.0155474	0.437462	NDUFB1/NDUFA3/ATP5ME/UQCC3/ATP5F1E/SLC25A51/CYCS/COX7B/MT-ATP8/MT-ND2/UQCRB/ATP5MF/MT-ND4L/SDHAF2/GHITM	15	FALSE	1/130	167/9003	0.913865	0.959348	NDUFB1	1	FALSE	2/61	167/8729	0.326193	0.609214	PDE12/GHITM	2	FALSE	14/275	164/8351	0.00100058	0.0526507	NDUFB1/NDUFA3/ATP5F1E/ATP5ME/COX7B/CYCS/NDUFA1/MT-ATP8/UQCRB/PPIF/UQCRH/ATP5MF/COX6C/COX7C	14	FALSE	17/348	166/8398	0.000501175	0.0312705	ATP5F1E/NDUFB1/MT-ATP8/GHITM/NDUFA3/ATP5MF/COX7A2/COX7B/UQCC3/ATP5ME/NDUFA1/NDUFC1/MTFR1L/UQCR11/MT-ND4L/COX7A2L/SDHAF2	17	TRUE	2/125	160/8059	0.714389	0.968608	CYCS/ATP5ME	2	FALSE	8/221	161/7787	0.0872317	0.902002
More in resister	GO	GO:0009142	nucleoside triphosphate biosynthetic process	12/419	112/8530	0.00868368	0.30642	NDUFB1/NDUFA3/ATP5ME/UQCC3/ATP5F1E/ATP6V0C/MT-ATP8/ALDOA/MT-ND2/ATP5MF/MT-ND4L/UCKL1	12	FALSE	1/130	113/9003	0.808709	0.924765	NDUFB1	1	FALSE	NA	NA	NA	NA	NA	NA	NA	10/275	111/8351	0.00350618	0.112389	NDUFB1/NDUFA3/ATP5F1E/ATP5ME/ALDOA/NDUFA1/MT-ATP8/DMAC2L/ATP6V0C/ATP5MF	10	FALSE	14/348	113/8398	0.000223734	0.0180208	ATP5F1E/NDUFB1/MT-ATP8/PRKAG2/NDUFA3/ATP5MF/TGFB1/ATP6V0C/UQCC3/ALDOA/ATP5ME/NDUFA1/NDUFC1/MT-ND4L	14	TRUE	1/125	109/8059	0.820129	0.978906	ATP5ME	1	FALSE	5/221	108/7787	0.192288	0.962874
More in resister	GO	GO:0009145	purine nucleoside triphosphate biosynthetic process	11/419	101/8530	0.0104355	0.340341	NDUFB1/NDUFA3/ATP5ME/UQCC3/ATP5F1E/ATP6V0C/MT-ATP8/ALDOA/MT-ND2/ATP5MF/MT-ND4L	11	FALSE	1/130	101/9003	0.77175	0.912236	NDUFB1	1	FALSE	NA	NA	NA	NA	NA	NA	NA	10/275	101/8351	0.001742	0.0787117	NDUFB1/NDUFA3/ATP5F1E/ATP5ME/ALDOA/NDUFA1/MT-ATP8/DMAC2L/ATP6V0C/ATP5MF	10	FALSE	14/348	103/8398	8.16877e-05	0.00882625	ATP5F1E/NDUFB1/MT-ATP8/PRKAG2/NDUFA3/ATP5MF/TGFB1/ATP6V0C/UQCC3/ALDOA/ATP5ME/NDUFA1/NDUFC1/MT-ND4L	14	TRUE	1/125	100/8059	0.792573	0.97541	ATP5ME	1	FALSE	5/221	99/7787	0.149902	0.962874
More in resister	GO	GO:0009201	ribonucleoside triphosphate biosynthetic process	12/419	104/8530	0.0048294	0.203829	NDUFB1/NDUFA3/ATP5ME/UQCC3/ATP5F1E/ATP6V0C/MT-ATP8/ALDOA/MT-ND2/ATP5MF/MT-ND4L/UCKL1	12	FALSE	1/130	105/9003	0.784796	0.91533	NDUFB1	1	FALSE	NA	NA	NA	NA	NA	NA	NA	10/275	103/8351	0.00201943	0.0856609	NDUFB1/NDUFA3/ATP5F1E/ATP5ME/ALDOA/NDUFA1/MT-ATP8/DMAC2L/ATP6V0C/ATP5MF	10	FALSE	14/348	106/8398	0.000112129	0.0110385	ATP5F1E/NDUFB1/MT-ATP8/PRKAG2/NDUFA3/ATP5MF/TGFB1/ATP6V0C/UQCC3/ALDOA/ATP5ME/NDUFA1/NDUFC1/MT-ND4L	14	TRUE	1/125	102/8059	0.799037	0.97541	ATP5ME	1	FALSE	5/221	101/7787	0.158955	0.962874
More in resister	GO	GO:0009206	purine ribonucleoside triphosphate biosynthetic process	11/419	100/8530	0.00971292	0.331858	NDUFB1/NDUFA3/ATP5ME/UQCC3/ATP5F1E/ATP6V0C/MT-ATP8/ALDOA/MT-ND2/ATP5MF/MT-ND4L	11	FALSE	1/130	100/9003	0.768368	0.911438	NDUFB1	1	FALSE	NA	NA	NA	NA	NA	NA	NA	10/275	100/8351	0.00161534	0.0754492	NDUFB1/NDUFA3/ATP5F1E/ATP5ME/ALDOA/NDUFA1/MT-ATP8/DMAC2L/ATP6V0C/ATP5MF	10	FALSE	14/348	102/8398	7.32846e-05	0.00818517	ATP5F1E/NDUFB1/MT-ATP8/PRKAG2/NDUFA3/ATP5MF/TGFB1/ATP6V0C/UQCC3/ALDOA/ATP5ME/NDUFA1/NDUFC1/MT-ND4L	14	TRUE	1/125	99/8059	0.789263	0.973739	ATP5ME	1	FALSE	5/221	98/7787	0.145461	0.962874
More in resister	GO	GO:0009617	response to bacterium	19/419	305/8530	0.169884	0.999986	ROMO1/SELENOS/PTGER2/RPL39/CFD/LSM5/MAP2K3/CSF1/CXCL2/PABPN1/CXCL3/OCIAD2/CCL3/EDN1/FABP4/IL6R/LYZ/RNASE6/RGS1	19	FALSE	2/130	310/9003	0.941996	0.970611	SELENOS/ROMO1	2	FALSE	2/61	311/8729	0.645144	0.75995	SELENOS/PTGER2	2	FALSE	22/275	303/8351	0.000404842	0.0280488	RPL39/MAP2K3/IL6/SELENOS/OCIAD2/FABP4/EDN1/CSF1/CXCL2/IL6R/LPL/CXCL8/CXCL3/IL36B/HNRNPA0/PABPN1/MAPKAPK2/IL7R/CHMP5/CFD/CCL3/LY86	22	TRUE	18/348	302/8398	0.0766318	0.622897	SELENOS/CCL3/C15orf48/CXCL8/RPL39/CSF1/ROMO1/RGS1/C3/CFD/CXCL2/TGFB1/MAP2K3/LYZ/EDN1/CXCL3/TNFRSF1B/IL6R	18	FALSE	5/125	281/8059	0.442551	0.949037	CFD/ROMO1/SELENOS/CSF1/RPL39	5	FALSE	15/221	276/7787	0.0118122	0.338159
More in resister	GO	GO:0009636	response to toxic substance	7/419	118/8530	0.359849	0.999986	SELENOS/MPST/CYGB/TXN/GSTM3/CCL3/CYP1B1	7	FALSE	7/130	117/9003	0.00148097	0.371723	SELENOS/CYGB/GSTM3/MT1H/TXN/MT1G/MPST	7	FALSE	3/61	116/8729	0.0471892	0.530843	SELENOS/TXN/CYP1B1	3	FALSE	11/275	115/8351	0.00138025	0.0659503	MPST/SELENOS/GSTM3/MT1G/SNN/TXN/MT1A/PON2/ABTB2/MT1E/CCL3	11	FALSE	5/348	113/8398	0.505661	0.924659	GSTM3/SELENOS/CCL3/TXN/NQO1	5	FALSE	4/125	112/8059	0.0959316	0.949037	GSTM3/SELENOS/TXN/MPST	4	FALSE	14/221	110/7787	2.39818e-06	0.000197793
More in resister	GO	GO:0010043	response to zinc ion	NA	NA	NA	NA	NA	NA	NA	2/130	27/9003	0.0574255	0.755714	MT1H/MT1G	2	FALSE	NA	NA	NA	NA	NA	NA	NA	3/275	24/8351	0.0429042	0.423273	MT1G/MT1A/MT1E	3	FALSE	NA	NA	NA	NA	NA	NA	NA	NA	NA	NA	NA	NA	NA	NA	7/221	23/7787	2.24477e-06	0.000189656
More in resister	GO	GO:0010273	detoxification of copper ion	NA	NA	NA	NA	NA	NA	NA	2/130	10/9003	0.00863086	0.507482	MT1H/MT1G	2	FALSE	NA	NA	NA	NA	NA	NA	NA	3/275	10/8351	0.00356877	0.112389	MT1G/MT1A/MT1E	3	FALSE	NA	NA	NA	NA	NA	NA	NA	NA	NA	NA	NA	NA	NA	NA	7/221	10/7787	1.50694e-09	1.80002e-07
More in resister	GO	GO:0010565	regulation of cellular ketone metabolic process	6/419	67/8530	0.110024	0.999986	MID1IP1/MTLN/EIF6/NR4A3/APOC1/APOC2	6	FALSE	2/130	69/9003	0.262849	0.809563	EIF6/NR4A3	2	FALSE	1/61	66/8729	0.3716	0.634377	EIF6	1	FALSE	10/275	67/8351	6.00668e-05	0.00657099	FABP5/EGR1/MFSD2A/APOC2/INSIG1/MID1IP1/EIF6/RDH10/APOC1/ANXA1	10	TRUE	7/348	65/8398	0.0174632	0.296406	MFSD2A/EIF6/MTLN/MID1IP1/PRKAG2/NR4A3/ATP2B4	7	FALSE	4/125	62/8059	0.0154012	0.49349	EIF6/MFSD2A/FABP5/MID1IP1	4	FALSE	4/221	58/7787	0.0817455	0.876463
More in resister	GO	GO:0010827	regulation of glucose transmembrane transport	5/419	45/8530	0.0681726	0.999986	ARPP19/SELENOS/PEA15/NR4A3/EDN1	5	FALSE	3/130	47/9003	0.0300743	0.657791	SELENOS/ARPP19/NR4A3	3	FALSE	2/61	48/8729	0.0441231	0.530843	SELENOS/ARPP19	2	FALSE	5/275	48/8351	0.0201401	0.310084	SELENOS/ARPP19/FABP5/EDN1/PEA15	5	FALSE	8/348	45/8398	0.000450629	0.0297953	SELENOS/ARPP19/PRKAG2/PEA15/C3/NR4A3/OSBPL8/EDN1	8	TRUE	3/125	41/8059	0.0253066	0.600652	SELENOS/ARPP19/FABP5	3	FALSE	3/221	42/7787	0.115746	0.962874
More in resister	GO	GO:0015980	energy derivation by oxidation of organic compounds	22/419	248/8530	0.00514891	0.213135	SELENOS/NDUFB1/PHKG1/MTLN/PPP1CB/NDUFA3/ATP5ME/UQCC3/ATP5F1E/NR4A3/SLC25A51/CYCS/COX7B/ETFRF1/MT-ATP8/MT-ND2/UQCRB/ATP5MF/MT-ND4L/SDHAF2/GHITM/DYRK2	22	FALSE	4/130	251/9003	0.492745	0.847081	SELENOS/NDUFB1/NR4A3/DYRK2	4	FALSE	3/61	251/8729	0.25586	0.58311	PDE12/SELENOS/GHITM	3	FALSE	17/275	248/8351	0.00334615	0.112389	MYC/NDUFB1/NDUFA3/ATP5F1E/ATP5ME/SELENOS/COX7B/CYCS/NDUFA1/MT-ATP8/UQCRB/PPIF/PHLDA2/UQCRH/ATP5MF/COX6C/COX7C	17	FALSE	22/348	247/8398	0.000570245	0.0341456	SELENOS/ATP5F1E/MTLN/NDUFB1/MT-ATP8/PRKAG2/GHITM/NDUFA3/ATP5MF/COX7A2/COX7B/UQCC3/NR4A3/ATP5ME/NDUFA1/NDUFC1/MTFR1L/UQCR11/MT-ND4L/COX7A2L/SDHAF2/PHLDA2	22	TRUE	3/125	239/8059	0.722318	0.968608	SELENOS/CYCS/ATP5ME	3	FALSE	9/221	239/7787	0.238362	0.962874
More in resister	GO	GO:0015986	proton motive force-driven ATP synthesis	9/419	72/8530	0.00833246	0.298927	NDUFB1/NDUFA3/ATP5ME/ATP5F1E/ATP6V0C/MT-ATP8/MT-ND2/ATP5MF/MT-ND4L	9	FALSE	1/130	72/9003	0.650557	0.883702	NDUFB1	1	FALSE	NA	NA	NA	NA	NA	NA	NA	8/275	71/8351	0.00219958	0.0905311	NDUFB1/NDUFA3/ATP5F1E/ATP5ME/NDUFA1/MT-ATP8/ATP6V0C/ATP5MF	8	FALSE	10/348	72/8398	0.000711032	0.0409074	ATP5F1E/NDUFB1/MT-ATP8/NDUFA3/ATP5MF/ATP6V0C/ATP5ME/NDUFA1/NDUFC1/MT-ND4L	10	TRUE	1/125	71/8059	0.672009	0.965393	ATP5ME	1	FALSE	4/221	71/7787	0.142142	0.962874
More in resister	GO	GO:0016072	rRNA metabolic process	22/419	236/8530	0.002831	0.136193	DCAF13/RRP15/RPS27/EIF6/RPS21/RPF2/GTF2H5/DDX21/BRIX1/C1D/RPF1/NIFK/RPS28/POP4/UTP4/TFB2M/METTL5/GAR1/ESF1/RPUSD3/NSUN5/EXOSC6	22	FALSE	10/130	238/9003	0.0022935	0.422931	DCAF13/RRP15/NIFK/EIF6/RPF2/MAK16/GAR1/DDX21/BRIX1/RPS27	10	FALSE	8/61	237/8729	0.000223037	0.0233891	RRP15/DCAF13/EIF6/TFB2M/ESF1/MAK16/URB1/GTF2H5	8	TRUE	11/275	226/8351	0.126241	0.586906	DCAF13/RPS27/RPS21/RPS17/RPS28/GTPBP4/C1D/RPL35A/YTHDF2/EIF6/WDR74	11	FALSE	17/348	233/8398	0.0166147	0.283089	RPS27/DCAF13/EIF6/RPS21/RRP15/MAK16/RPS28/DDX18/ESF1/POP4/DDX21/NOP58/UTP11/DDX27/C1D/RPL35A/BYSL	17	FALSE	8/125	227/8059	0.0246039	0.600652	DCAF13/EIF6/RPS27/DIMT1/RRP15/EMG1/C1D/RPF2	8	FALSE	12/221	226/7787	0.0271209	0.566693
More in resister	GO	GO:0017004	cytochrome complex assembly	10/419	38/8530	1.00502e-05	0.00254506	COX20/PET100/COX17/COX16/C12orf73/UQCC3/SMIM4/STMP1/COX19/COA3	10	TRUE	3/130	38/9003	0.017176	0.538897	COX17/COX20/PET100	3	FALSE	3/61	38/8729	0.00230188	0.0952856	C12orf73/COX20/COX17	3	FALSE	4/275	38/8351	0.0353008	0.404257	PET100/HCCS/COX17/COX16	4	FALSE	7/348	38/8398	0.000820402	0.0448689	PET100/COX17/COX20/COX16/UQCC3/STMP1/SMIM4	7	TRUE	4/125	37/8059	0.00245208	0.174327	PET100/HCCS/C12orf73/SMIM4	4	FALSE	5/221	37/7787	0.00365693	0.147298
More in resister	GO	GO:0019217	regulation of fatty acid metabolic process	6/419	48/8530	0.0290195	0.618459	MID1IP1/MTLN/EIF6/NR4A3/APOC1/APOC2	6	FALSE	2/130	49/9003	0.157383	0.809563	EIF6/NR4A3	2	FALSE	1/61	48/8729	0.286465	0.600913	EIF6	1	FALSE	8/275	47/8351	0.00012853	0.0113681	FABP5/MFSD2A/APOC2/INSIG1/MID1IP1/EIF6/APOC1/ANXA1	8	TRUE	6/348	47/8398	0.0124028	0.247498	MFSD2A/EIF6/MTLN/MID1IP1/PRKAG2/NR4A3	6	FALSE	4/125	45/8059	0.00502952	0.265906	EIF6/MFSD2A/FABP5/MID1IP1	4	FALSE	4/221	42/7787	0.0304482	0.594296
More in resister	GO	GO:0019221	cytokine-mediated signaling pathway	13/419	258/8530	0.503562	0.999986	IL1R1/IL1RN/BIRC2/GPS2/CSF1/CXCL2/CXCL3/CCL3/OTULIN/EDN1/CLCF1/IL6R/JAGN1	13	FALSE	3/130	259/9003	0.727551	0.902009	IL1R1/IL1RN/CNOT9	3	FALSE	NA	NA	NA	NA	NA	NA	NA	22/275	257/8351	3.67652e-05	0.00424536	IL1R1/CLCF1/F3/IL6/IL1RN/FAS/EGR1/CCL3L1/EDN1/CSF1/CXCL2/IL6R/CCRL2/CXCL8/CXCL3/IL36B/YTHDF2/BIRC2/IL7R/JAGN1/CCL3/SPHK1	22	TRUE	16/348	263/8398	0.079521	0.635647	CCL3/CXCL8/IL1R1/IL1RN/CSF1/JAGN1/CCL3L1/SPHK1/CXCL2/GPR35/BIRC2/EDN1/CXCL3/TNFRSF1B/OTULIN/IL6R	16	FALSE	3/125	238/8059	0.719661	0.968608	IL1RN/CSF1/CLCF1	3	FALSE	10/221	238/7787	0.13913	0.962874
More in resister	GO	GO:0019646	aerobic electron transport chain	10/419	82/8530	0.00661152	0.246881	NDUFB1/NDUFA3/UQCC3/SLC25A51/CYCS/COX7B/MT-ND2/UQCRB/MT-ND4L/SDHAF2	10	FALSE	1/130	82/9003	0.698239	0.891267	NDUFB1	1	FALSE	NA	NA	NA	NA	NA	NA	NA	9/275	82/8351	0.00142647	0.0673843	NDUFB1/NDUFA3/COX7B/CYCS/NDUFA1/UQCRB/UQCRH/COX6C/COX7C	9	FALSE	11/348	83/8398	0.000585794	0.0341456	NDUFB1/NDUFA3/COX7A2/COX7B/UQCC3/NDUFA1/NDUFC1/UQCR11/MT-ND4L/COX7A2L/SDHAF2	11	TRUE	1/125	82/8059	0.724281	0.968608	CYCS	1	FALSE	6/221	82/7787	0.0285918	0.586047
More in resister	GO	GO:0019730	antimicrobial humoral response	6/419	25/8530	0.00108061	0.0715204	ROMO1/RPL39/CXCL2/CXCL3/LYZ/RNASE6	6	FALSE	1/130	24/9003	0.294979	0.809563	ROMO1	1	FALSE	NA	NA	NA	NA	NA	NA	NA	4/275	26/8351	0.00970963	0.206144	RPL39/CXCL2/CXCL8/CXCL3	4	FALSE	7/348	23/8398	2.72491e-05	0.00416253	CXCL8/RPL39/ROMO1/PPP2R3C/CXCL2/LYZ/CXCL3	7	TRUE	2/125	21/8059	0.0413577	0.764949	ROMO1/RPL39	2	FALSE	5/221	22/7787	0.000312205	0.0180246
More in resister	GO	GO:0022613	ribonucleoprotein complex biogenesis	50/419	417/8530	2.65714e-09	1.1439e-05	CINP/RSL24D1/DCAF13/RRP15/RBIS/EIF3J/SNRPB2/RPS27/SNRPF/RPL38/EIF6/TAF9/TMA16/NIP7/RPS21/RPF2/MCTS1/GTF2H5/DDX21/BRIX1/C1D/MRPL36/RPF1/SRSF6/SNRPD1/SNRPE/NIFK/RPS27L/C1QBP/WDR77/RPL24/RAN/DHX30/RPS28/POP4/UTP4/RAMAC/TFB2M/MRPL20/METTL5/SF3A2/GAR1/SNRPG/ESF1/SF3B6/RPUSD3/NSUN5/NUDT21/EXOSC6/SNRPD2	50	TRUE	19/130	423/9003	9.44024e-06	0.00703536	DCAF13/RRP15/EIF3J/C1QBP/SNRPF/NIFK/CINP/EIF6/RPF2/MAK16/RBIS/GAR1/RPL38/RSL24D1/SNRPD1/NIP7/DDX21/BRIX1/RPS27	19	TRUE	11/61	422/8729	0.000138477	0.0184607	RRP15/CINP/DCAF13/EIF6/TFB2M/ESF1/MAK16/C1QBP/URB1/RBIS/GTF2H5	11	TRUE	20/275	402/8351	0.0425006	0.423273	DCAF13/RPL38/RPS27/RBIS/RPS21/RPS17/RPS28/GTPBP4/MRPL36/SNRPF/RPL6/RSL24D1/C1D/EIF3J/RPL35A/YTHDF2/EIF6/RPL24/RAMAC/WDR74	20	FALSE	37/348	415/8398	7.50738e-06	0.00138858	CINP/RPL38/RPS27/DCAF13/EIF6/RPS21/RSL24D1/RRP15/MAK16/RPS28/RBIS/TMA16/RAMAC/DDX18/EIF3J/SNRPG/SNRPE/ESF1/C1QBP/POP4/SNRPF/DDX21/SF3B4/NOP58/UTP11/SNRPB2/DDX27/C1D/RPL24/SNRPD1/RAN/URB2/SF3A2/TAF9/SF3B6/RPL35A/BYSL	37	TRUE	17/125	403/8059	0.000149635	0.0378245	DCAF13/RAMAC/RPL38/CINP/EIF6/NIP7/RPS27/DIMT1/RRP15/SF3B4/EMG1/RSL24D1/C1D/NUDT21/RPL24/RPF2/TMA16	17	TRUE	25/221	401/7787	0.00016381	0.00978342
More in resister	GO	GO:0022618	ribonucleoprotein complex assembly	25/419	181/8530	2.4112e-06	0.00103802	EIF3J/SNRPB2/RPS27/SNRPF/RPL38/EIF6/TAF9/RPF2/MCTS1/BRIX1/SRSF6/SNRPD1/SNRPE/RPS27L/WDR77/RPL24/DHX30/RPS28/RAMAC/MRPL20/SF3A2/SNRPG/SF3B6/NUDT21/SNRPD2	25	TRUE	8/130	184/9003	0.00509941	0.507482	EIF3J/SNRPF/EIF6/RPF2/RPL38/SNRPD1/BRIX1/RPS27	8	FALSE	1/61	183/8729	0.726635	0.806062	EIF6	1	FALSE	9/275	176/8351	0.126553	0.586906	RPL38/RPS27/RPS28/SNRPF/RPL6/EIF3J/EIF6/RPL24/RAMAC	9	FALSE	16/348	181/8398	0.00338905	0.116384	RPL38/RPS27/EIF6/RPS28/RAMAC/EIF3J/SNRPG/SNRPE/SNRPF/SF3B4/SNRPB2/RPL24/SNRPD1/SF3A2/TAF9/SF3B6	16	FALSE	8/125	176/8059	0.00593367	0.274568	RAMAC/RPL38/EIF6/RPS27/SF3B4/NUDT21/RPL24/RPF2	8	FALSE	10/221	176/7787	0.0280138	0.58052
More in resister	GO	GO:0022904	respiratory electron transport chain	12/419	104/8530	0.0048294	0.203829	NDUFB1/NDUFA3/UQCC3/SLC25A51/CYCS/COX7B/ETFRF1/MT-ND2/UQCRB/MT-ND4L/SDHAF2/GHITM	12	FALSE	1/130	104/9003	0.781606	0.91533	NDUFB1	1	FALSE	1/61	105/8729	0.523255	0.689925	GHITM	1	FALSE	9/275	104/8351	0.00714799	0.167877	NDUFB1/NDUFA3/COX7B/CYCS/NDUFA1/UQCRB/UQCRH/COX6C/COX7C	9	FALSE	12/348	104/8398	0.00118047	0.0594259	NDUFB1/GHITM/NDUFA3/COX7A2/COX7B/UQCC3/NDUFA1/NDUFC1/UQCR11/MT-ND4L/COX7A2L/SDHAF2	12	FALSE	1/125	104/8059	0.805302	0.978143	CYCS	1	FALSE	6/221	103/7787	0.0721924	0.856865
More in resister	GO	GO:0030595	leukocyte chemotaxis	8/419	122/8530	0.250389	0.999986	CSF1/CXCL2/CXCL3/CCL3/EDN1/DUSP1/C1QBP/IL6R	8	FALSE	2/130	122/9003	0.528882	0.853195	C1QBP/PTK2	2	FALSE	1/61	123/8729	0.580492	0.7224	C1QBP	1	FALSE	12/275	119/8351	0.000525172	0.0341116	DUSP1/IL6/CCL3L1/EDN1/CSF1/CXCL2/IL6R/CXCL8/CXCL3/VEGFA/CCL3/ANXA1	12	TRUE	12/348	125/8398	0.00553962	0.15869	CCL3/CXCL8/CSF1/TNFSF14/CCL3L1/CXCL2/C1QBP/ZNF580/EDN1/CXCL3/RAC2/IL6R	12	FALSE	1/125	103/8059	0.802194	0.97541	CSF1	1	FALSE	5/221	107/7787	0.187379	0.962874
More in resister	GO	GO:0033108	mitochondrial respiratory chain complex assembly	17/419	97/8530	4.08585e-06	0.00159906	COX20/PET100/COX17/COX16/NDUFB1/C12orf73/NDUFA3/UQCC3/NDUFAF2/TMEM126A/SMIM4/STMP1/COX19/NDUFAF4/MT-ND2/COA3/SDHAF2	17	TRUE	5/130	97/9003	0.013006	0.507482	COX17/COX20/PET100/NDUFAF4/NDUFB1	5	FALSE	4/61	97/8729	0.00460839	0.161089	C12orf73/COX20/TMEM126A/COX17	4	FALSE	6/275	94/8351	0.0892496	0.511034	PET100/NDUFB1/NDUFA3/COX17/NDUFA1/COX16	6	FALSE	13/348	94/8398	0.000122191	0.0115171	PET100/COX17/COX20/NDUFAF4/NDUFB1/NDUFA3/COX16/UQCC3/NDUFA1/NDUFC1/STMP1/SMIM4/SDHAF2	13	TRUE	4/125	93/8059	0.0561248	0.861044	PET100/C12orf73/SMIM4/NDUFAF4	4	FALSE	7/221	92/7787	0.0153686	0.412741
More in resister	GO	GO:0033617	mitochondrial cytochrome c oxidase assembly	9/419	24/8530	1.03384e-06	0.000516482	COX20/PET100/COX17/COX16/C12orf73/SMIM4/STMP1/COX19/COA3	9	TRUE	3/130	24/9003	0.00477004	0.507482	COX17/COX20/PET100	3	FALSE	3/61	24/8729	0.000592015	0.046562	C12orf73/COX20/COX17	3	FALSE	3/275	24/8351	0.0429042	0.423273	PET100/COX17/COX16	3	FALSE	6/348	24/8398	0.000346014	0.0239506	PET100/COX17/COX20/COX16/STMP1/SMIM4	6	TRUE	3/125	23/8059	0.00514281	0.265906	PET100/C12orf73/SMIM4	3	FALSE	5/221	23/7787	0.000389795	0.0217782
More in resister	GO	GO:0034645	cellular macromolecule biosynthetic process	NA	NA	NA	NA	NA	NA	NA	NA	NA	NA	NA	NA	NA	NA	NA	NA	NA	NA	NA	NA	NA	NA	NA	NA	NA	NA	NA	NA	NA	NA	NA	NA	NA	NA	NA	NA	NA	NA	NA	NA	NA	NA	NA	NA	NA	NA
More in resister	GO	GO:0035924	cellular response to vascular endothelial growth factor stimulus	1/419	25/8530	0.716637	0.999986	MAP2K3	1	FALSE	1/130	25/9003	0.305186	0.809563	MT1G	1	FALSE	NA	NA	NA	NA	NA	NA	NA	6/275	27/8351	0.000199337	0.0165729	MAP2K3/MT1G/MAPKAPK2/VEGFA/SPHK1/ANXA1	6	TRUE	4/348	26/8398	0.021051	0.339413	SPRY2/SPHK1/MAP2K3/ATP2B4	4	FALSE	NA	NA	NA	NA	NA	NA	NA	5/221	23/7787	0.000389795	0.0217782
More in resister	GO	GO:0036260	RNA capping	7/419	20/8530	2.91328e-05	0.00597223	SNRPF/RNMT/SNRPD1/SNRPE/RAMAC/SNRPG/SNRPD2	7	TRUE	2/130	20/9003	0.0331751	0.676989	SNRPF/SNRPD1	2	FALSE	NA	NA	NA	NA	NA	NA	NA	2/275	18/8351	0.117058	0.567393	SNRPF/RAMAC	2	FALSE	5/348	20/8398	0.00109959	0.0559908	RAMAC/SNRPG/SNRPE/SNRPF/SNRPD1	5	FALSE	1/125	19/8059	0.257213	0.949037	RAMAC	1	FALSE	3/221	19/7787	0.015619	0.41301
More in resister	GO	GO:0038066	p38MAPK cascade	2/419	37/8530	0.548928	0.999986	MAP2K3/DUSP1	2	FALSE	NA	NA	NA	NA	NA	NA	NA	NA	NA	NA	NA	NA	NA	NA	7/275	38/8351	0.000204321	0.0166541	GADD45A/MAP2K3/DUSP1/GADD45G/MAPKAPK2/VEGFA/SPHK1	7	TRUE	2/348	37/8398	0.45733	0.924659	SPHK1/MAP2K3	2	FALSE	1/125	35/8059	0.422064	0.949037	GADD45A	1	FALSE	4/221	35/7787	0.0165957	0.425833
More in resister	GO	GO:0042180	cellular ketone metabolic process	8/419	115/8530	0.203581	0.999986	MID1IP1/AKR1C2/MTLN/EIF6/NR4A3/APOC1/APOC2/GLO1	8	FALSE	3/130	116/9003	0.234975	0.809563	AKR1C2/EIF6/NR4A3	3	FALSE	1/61	113/8729	0.549585	0.708023	EIF6	1	FALSE	12/275	113/8351	0.000325874	0.0237659	FABP5/EGR1/MFSD2A/APOC2/INSIG1/MID1IP1/DHRS9/GLO1/EIF6/RDH10/APOC1/ANXA1	12	TRUE	8/348	111/8398	0.089205	0.665283	MFSD2A/EIF6/MTLN/MID1IP1/PRKAG2/NR4A3/ATP2B4/NQO1	8	FALSE	5/125	107/8059	0.0251085	0.600652	AKR1C2/EIF6/MFSD2A/FABP5/MID1IP1	5	FALSE	6/221	101/7787	0.0669648	0.832058
More in resister	GO	GO:0042254	ribosome biogenesis	35/419	283/8530	3.57094e-07	0.000256215	CINP/RSL24D1/DCAF13/RRP15/RBIS/RPS27/RPL38/EIF6/TMA16/NIP7/RPS21/RPF2/GTF2H5/DDX21/BRIX1/C1D/MRPL36/RPF1/NIFK/RPS27L/C1QBP/RPL24/RAN/DHX30/RPS28/POP4/UTP4/TFB2M/MRPL20/METTL5/GAR1/ESF1/RPUSD3/NSUN5/EXOSC6	35	TRUE	16/130	287/9003	3.44197e-06	0.00431967	DCAF13/RRP15/C1QBP/NIFK/CINP/EIF6/RPF2/MAK16/RBIS/GAR1/RPL38/RSL24D1/NIP7/DDX21/BRIX1/RPS27	16	TRUE	11/61	286/8729	3.74624e-06	0.00589283	RRP15/CINP/DCAF13/EIF6/TFB2M/ESF1/MAK16/C1QBP/URB1/RBIS/GTF2H5	11	TRUE	17/275	271/8351	0.00806341	0.177352	DCAF13/RPL38/RPS27/RBIS/RPS21/RPS17/RPS28/GTPBP4/MRPL36/RPL6/RSL24D1/C1D/RPL35A/YTHDF2/EIF6/RPL24/WDR74	17	FALSE	26/348	281/8398	9.81433e-05	0.010111	CINP/RPL38/RPS27/DCAF13/EIF6/RPS21/RSL24D1/RRP15/MAK16/RPS28/RBIS/TMA16/DDX18/ESF1/C1QBP/POP4/DDX21/NOP58/UTP11/DDX27/C1D/RPL24/RAN/URB2/RPL35A/BYSL	26	TRUE	14/125	273/8059	7.89034e-05	0.0299176	DCAF13/RPL38/CINP/EIF6/NIP7/RPS27/DIMT1/RRP15/EMG1/RSL24D1/C1D/RPL24/RPF2/TMA16	14	TRUE	20/221	271/7787	8.11784e-05	0.00520745
More in resister	GO	GO:0042255	ribosome assembly	12/419	54/8530	8.81656e-06	0.00253035	RPS27/RPL38/EIF6/NIP7/RPF2/BRIX1/RPS27L/C1QBP/RPL24/DHX30/RPS28/MRPL20	12	TRUE	7/130	54/9003	1.12117e-05	0.00703536	C1QBP/EIF6/RPF2/RPL38/NIP7/BRIX1/RPS27	7	TRUE	2/61	54/8729	0.0545142	0.530843	EIF6/C1QBP	2	FALSE	6/275	52/8351	0.00689288	0.163603	RPL38/RPS27/RPS28/RPL6/EIF6/RPL24	6	FALSE	6/348	53/8398	0.0215811	0.343901	RPL38/RPS27/EIF6/RPS28/C1QBP/RPL24	6	FALSE	6/125	52/8059	0.000140204	0.0378245	RPL38/EIF6/NIP7/RPS27/RPL24/RPF2	6	TRUE	6/221	52/7787	0.00334091	0.136152
More in resister	GO	GO:0042273	ribosomal large subunit biogenesis	14/419	73/8530	9.90216e-06	0.00254506	CINP/RSL24D1/RRP15/RPL38/EIF6/TMA16/NIP7/RPF2/BRIX1/RPF1/NIFK/RPL24/DHX30/MRPL20	14	TRUE	10/130	73/9003	7.99905e-08	0.000200776	RRP15/NIFK/CINP/EIF6/RPF2/MAK16/RPL38/RSL24D1/NIP7/BRIX1	10	TRUE	5/61	73/8729	0.000147203	0.0184607	RRP15/CINP/EIF6/MAK16/URB1	5	TRUE	8/275	71/8351	0.00219958	0.0905311	RPL38/GTPBP4/RPL6/RSL24D1/RPL35A/EIF6/RPL24/WDR74	8	FALSE	10/348	73/8398	0.000794223	0.0439801	CINP/RPL38/EIF6/RSL24D1/RRP15/MAK16/TMA16/DDX18/RPL24/RPL35A	10	TRUE	9/125	72/8059	1.45453e-06	0.00330906	RPL38/CINP/EIF6/NIP7/RRP15/RSL24D1/RPL24/RPF2/TMA16	9	TRUE	11/221	72/7787	4.94549e-06	0.0003569
More in resister	GO	GO:0042274	ribosomal small subunit biogenesis	8/419	72/8530	0.0242281	0.566859	DCAF13/RPS27/RPL38/RPS21/GTF2H5/RPS27L/RPS28/UTP4	8	FALSE	3/130	72/9003	0.0856491	0.809563	DCAF13/RPL38/RPS27	3	FALSE	2/61	72/8729	0.0899896	0.530843	DCAF13/GTF2H5	2	FALSE	6/275	68/8351	0.0240095	0.334925	DCAF13/RPL38/RPS27/RPS21/RPS17/RPS28	6	FALSE	6/348	72/8398	0.0771348	0.624693	RPL38/RPS27/DCAF13/RPS21/RPS28/BYSL	6	FALSE	4/125	70/8059	0.0230427	0.589012	DCAF13/RPL38/RPS27/EMG1	4	FALSE	7/221	69/7787	0.00326642	0.134701
More in resister	GO	GO:0042304	regulation of fatty acid biosynthetic process	4/419	25/8530	0.0320056	0.672118	MID1IP1/EIF6/APOC1/APOC2	4	FALSE	1/130	25/9003	0.305186	0.809563	EIF6	1	FALSE	1/61	25/8729	0.161013	0.537963	EIF6	1	FALSE	7/275	25/8351	1.12346e-05	0.00161042	FABP5/APOC2/INSIG1/MID1IP1/EIF6/APOC1/ANXA1	7	TRUE	2/348	25/8398	0.277694	0.924659	EIF6/MID1IP1	2	FALSE	3/125	25/8059	0.00653023	0.280307	EIF6/FABP5/MID1IP1	3	FALSE	3/221	23/7787	0.0262771	0.558429
More in resister	GO	GO:0042773	ATP synthesis coupled electron transport	10/419	87/8530	0.00995702	0.332287	NDUFB1/NDUFA3/UQCC3/CYCS/COX7B/MT-ND2/UQCRB/MT-ND4L/SDHAF2/GHITM	10	FALSE	1/130	87/9003	0.719599	0.897264	NDUFB1	1	FALSE	1/61	88/8729	0.462178	0.665134	GHITM	1	FALSE	9/275	88/8351	0.00234321	0.0927687	NDUFB1/NDUFA3/COX7B/CYCS/NDUFA1/UQCRB/UQCRH/COX6C/COX7C	9	FALSE	12/348	88/8398	0.000253993	0.0197401	NDUFB1/GHITM/NDUFA3/COX7A2/COX7B/UQCC3/NDUFA1/NDUFC1/UQCR11/MT-ND4L/COX7A2L/SDHAF2	12	TRUE	1/125	87/8059	0.745222	0.969496	CYCS	1	FALSE	6/221	87/7787	0.0367509	0.656211
More in resister	GO	GO:0042775	mitochondrial ATP synthesis coupled electron transport	10/419	87/8530	0.00995702	0.332287	NDUFB1/NDUFA3/UQCC3/CYCS/COX7B/MT-ND2/UQCRB/MT-ND4L/SDHAF2/GHITM	10	FALSE	1/130	87/9003	0.719599	0.897264	NDUFB1	1	FALSE	1/61	88/8729	0.462178	0.665134	GHITM	1	FALSE	9/275	88/8351	0.00234321	0.0927687	NDUFB1/NDUFA3/COX7B/CYCS/NDUFA1/UQCRB/UQCRH/COX6C/COX7C	9	FALSE	12/348	88/8398	0.000253993	0.0197401	NDUFB1/GHITM/NDUFA3/COX7A2/COX7B/UQCC3/NDUFA1/NDUFC1/UQCR11/MT-ND4L/COX7A2L/SDHAF2	12	TRUE	1/125	87/8059	0.745222	0.969496	CYCS	1	FALSE	6/221	87/7787	0.0367509	0.656211
More in resister	GO	GO:0042776	proton motive force-driven mitochondrial ATP synthesis	8/419	66/8530	0.0149745	0.424113	NDUFB1/NDUFA3/ATP5ME/ATP5F1E/MT-ATP8/MT-ND2/ATP5MF/MT-ND4L	8	FALSE	1/130	66/9003	0.618434	0.875504	NDUFB1	1	FALSE	NA	NA	NA	NA	NA	NA	NA	7/275	65/8351	0.00529509	0.135041	NDUFB1/NDUFA3/ATP5F1E/ATP5ME/NDUFA1/MT-ATP8/ATP5MF	7	FALSE	9/348	66/8398	0.00148885	0.0709206	ATP5F1E/NDUFB1/MT-ATP8/NDUFA3/ATP5MF/ATP5ME/NDUFA1/NDUFC1/MT-ND4L	9	FALSE	1/125	65/8059	0.639469	0.958362	ATP5ME	1	FALSE	4/221	65/7787	0.112406	0.962874
More in resister	GO	GO:0043043	peptide biosynthetic process	NA	NA	NA	NA	NA	NA	NA	NA	NA	NA	NA	NA	NA	NA	NA	NA	NA	NA	NA	NA	NA	NA	NA	NA	NA	NA	NA	NA	NA	NA	NA	NA	NA	NA	NA	NA	NA	NA	NA	NA	NA	NA	NA	NA	NA	NA
More in resister	GO	GO:0043467	regulation of generation of precursor metabolites and energy	5/419	90/8530	0.455216	0.999986	COX17/SELENOS/EIF6/GHITM/DYRK2	5	FALSE	4/130	92/9003	0.043847	0.744215	SELENOS/COX17/EIF6/DYRK2	4	FALSE	5/61	93/8729	0.000457768	0.0400038	PDE12/SELENOS/EIF6/GHITM/COX17	5	TRUE	5/275	94/8351	0.19743	0.713906	SELENOS/COX17/PPIF/PHLDA2/EIF6	5	FALSE	8/348	92/8398	0.0364541	0.460091	SELENOS/COX17/EIF6/PRKAG2/GHITM/COX7A2/COX7A2L/PHLDA2	8	FALSE	2/125	88/8059	0.397668	0.949037	EIF6/SELENOS	2	FALSE	3/221	88/7787	0.458074	0.962874
More in resister	GO	GO:0043603	cellular amide metabolic process	NA	NA	NA	NA	NA	NA	NA	NA	NA	NA	NA	NA	NA	NA	NA	NA	NA	NA	NA	NA	NA	NA	NA	NA	NA	NA	NA	NA	NA	NA	NA	NA	NA	NA	NA	NA	NA	NA	NA	NA	NA	NA	NA	NA	NA	NA
More in resister	GO	GO:0043604	amide biosynthetic process	NA	NA	NA	NA	NA	NA	NA	NA	NA	NA	NA	NA	NA	NA	NA	NA	NA	NA	NA	NA	NA	NA	NA	NA	NA	NA	NA	NA	NA	NA	NA	NA	NA	NA	NA	NA	NA	NA	NA	NA	NA	NA	NA	NA	NA	NA
More in resister	GO	GO:0045333	cellular respiration	18/419	200/8530	0.00940674	0.323968	NDUFB1/MTLN/NDUFA3/ATP5ME/UQCC3/ATP5F1E/NR4A3/SLC25A51/CYCS/COX7B/ETFRF1/MT-ATP8/MT-ND2/UQCRB/ATP5MF/MT-ND4L/SDHAF2/GHITM	18	FALSE	2/130	202/9003	0.793676	0.916401	NDUFB1/NR4A3	2	FALSE	2/61	202/8729	0.4143	0.64811	PDE12/GHITM	2	FALSE	14/275	197/8351	0.00547071	0.138669	NDUFB1/NDUFA3/ATP5F1E/ATP5ME/COX7B/CYCS/NDUFA1/MT-ATP8/UQCRB/PPIF/UQCRH/ATP5MF/COX6C/COX7C	14	FALSE	19/348	199/8398	0.00057722	0.0341456	ATP5F1E/MTLN/NDUFB1/MT-ATP8/GHITM/NDUFA3/ATP5MF/COX7A2/COX7B/UQCC3/NR4A3/ATP5ME/NDUFA1/NDUFC1/MTFR1L/UQCR11/MT-ND4L/COX7A2L/SDHAF2	19	TRUE	2/125	193/8059	0.805808	0.978236	CYCS/ATP5ME	2	FALSE	8/221	193/7787	0.182614	0.962874
More in resister	GO	GO:0046686	response to cadmium ion	2/419	39/8530	0.57778	0.999986	SUMO1/PRNP	2	FALSE	2/130	41/9003	0.11798	0.809563	MT1H/MT1G	2	FALSE	NA	NA	NA	NA	NA	NA	NA	3/275	39/8351	0.136094	0.609636	MT1G/MT1A/MT1E	3	FALSE	2/348	39/8398	0.484879	0.924659	MMP9/ERCC1	2	FALSE	NA	NA	NA	NA	NA	NA	NA	7/221	37/7787	6.71825e-05	0.00439095
More in resister	GO	GO:0046688	response to copper ion	1/419	25/8530	0.716637	0.999986	PRNP	1	FALSE	2/130	25/9003	0.0499999	0.744215	MT1H/MT1G	2	FALSE	NA	NA	NA	NA	NA	NA	NA	3/275	25/8351	0.0476053	0.434921	MT1G/MT1A/MT1E	3	FALSE	NA	NA	NA	NA	NA	NA	NA	NA	NA	NA	NA	NA	NA	NA	7/221	25/7787	4.19319e-06	0.000309047
More in resister	GO	GO:0046890	regulation of lipid biosynthetic process	5/419	90/8530	0.455216	0.999986	MID1IP1/EIF6/ORMDL1/APOC1/APOC2	5	FALSE	2/130	93/9003	0.389768	0.819587	EIF6/IGF1R	2	FALSE	1/61	91/8729	0.473489	0.665721	EIF6	1	FALSE	11/275	94/8351	0.000246417	0.0192243	FABP5/EGR1/MFSD2A/APOC2/INSIG1/MID1IP1/EIF6/RDH10/APOC1/SPHK1/ANXA1	11	TRUE	7/348	89/8398	0.0754004	0.617645	MFSD2A/EIF6/MID1IP1/SPHK1/C3/ORMDL2/ATP1A1	7	FALSE	4/125	87/8059	0.0458709	0.821704	EIF6/MFSD2A/FABP5/MID1IP1	4	FALSE	5/221	80/7787	0.0764529	0.857064
More in resister	GO	GO:0046916	cellular transition metal ion homeostasis	3/419	71/8530	0.684951	0.999986	BOLA2B/COX19/PRNP	3	FALSE	3/130	73/9003	0.0884197	0.809563	MT1H/SLC30A5/MT1G	3	FALSE	NA	NA	NA	NA	NA	NA	NA	4/275	69/8351	0.19188	0.705343	MYC/MT1G/MT1A/MT1E	4	FALSE	1/348	71/8398	0.951086	0.986031	BOLA2B	1	FALSE	NA	NA	NA	NA	NA	NA	NA	8/221	68/7787	0.000632568	0.0342378
More in resister	GO	GO:0050921	positive regulation of chemotaxis	5/419	68/8530	0.2411	0.999986	CSF1/CCL3/EDN1/C1QBP/IL6R	5	FALSE	2/130	68/9003	0.257478	0.809563	C1QBP/PTK2	2	FALSE	1/61	69/8729	0.384783	0.634377	C1QBP	1	FALSE	8/275	69/8351	0.00182927	0.0792111	F3/IL6/EDN1/CSF1/IL6R/CXCL8/VEGFA/CCL3	8	FALSE	10/348	70/8398	0.000566103	0.0341456	CCL3/CXCL8/CSF1/TNFSF14/TGFB1/C1QBP/ZNF580/EDN1/RAC2/IL6R	10	TRUE	1/125	57/8059	0.591052	0.949037	CSF1	1	FALSE	5/221	59/7787	0.0254614	0.551239
More in resister	GO	GO:0051123	RNA polymerase II preinitiation complex assembly	10/419	49/8530	0.000107508	0.0201227	TAF11/GTF2A2/MED30/MED7/TAF9/MED10/MED31/MED16/TAF13/MED21	10	TRUE	4/130	51/9003	0.00614121	0.507482	GTF2A2/TAF11/MED30/MED7	4	FALSE	4/61	51/8729	0.000422013	0.0390486	MED30/GTF2A2/MED7/TAF13	4	FALSE	3/275	49/8351	0.21811	0.743531	GTF2A2/MED7/MED10	3	FALSE	9/348	51/8398	0.000211337	0.0173375	GTF2A2/TAF11/MED31/TAF13/MED7/MED10/MED16/MED30/TAF9	9	TRUE	5/125	49/8059	0.000915126	0.160147	MED7/MED10/TAF11/MED31/MED16	5	FALSE	2/221	49/7787	0.407278	0.962874
More in resister	GO	GO:0055069	zinc ion homeostasis	NA	NA	NA	NA	NA	NA	NA	3/130	27/9003	0.00667994	0.507482	MT1H/SLC30A5/MT1G	3	FALSE	NA	NA	NA	NA	NA	NA	NA	3/275	26/8351	0.0525482	0.447629	MT1G/MT1A/MT1E	3	FALSE	NA	NA	NA	NA	NA	NA	NA	NA	NA	NA	NA	NA	NA	NA	7/221	25/7787	4.19319e-06	0.000309047
More in resister	GO	GO:0060260	regulation of transcription initiation by RNA polymerase II	10/419	59/8530	0.00052959	0.0569971	TAF11/GTF2A2/MED30/MED7/TAF9/MED10/MED31/MED16/TAF13/MED21	10	FALSE	4/130	61/9003	0.011486	0.507482	GTF2A2/TAF11/MED30/MED7	4	FALSE	4/61	61/8729	0.00083658	0.0572148	MED30/GTF2A2/MED7/TAF13	4	FALSE	4/275	59/8351	0.128902	0.586906	GTF2A2/SUB1/MED7/MED10	4	FALSE	11/348	61/8398	3.42789e-05	0.00481184	GTF2A2/TAF11/MED31/TAF13/MED7/MED10/MED16/MED30/ERCC1/SUB1/TAF9	11	TRUE	5/125	59/8059	0.00212403	0.174327	MED7/MED10/TAF11/MED31/MED16	5	FALSE	2/221	58/7787	0.49352	0.964113
More in resister	GO	GO:0060261	positive regulation of transcription initiation by RNA polymerase II	10/419	52/8530	0.000181358	0.0289165	TAF11/GTF2A2/MED30/MED7/TAF9/MED10/MED31/MED16/TAF13/MED21	10	TRUE	4/130	54/9003	0.00751858	0.507482	GTF2A2/TAF11/MED30/MED7	4	FALSE	4/61	54/8729	0.000525784	0.0435294	MED30/GTF2A2/MED7/TAF13	4	FALSE	4/275	52/8351	0.0911455	0.515008	GTF2A2/SUB1/MED7/MED10	4	FALSE	11/348	54/8398	1.01816e-05	0.00172675	GTF2A2/TAF11/MED31/TAF13/MED7/MED10/MED16/MED30/ERCC1/SUB1/TAF9	11	TRUE	5/125	52/8059	0.00120194	0.174327	MED7/MED10/TAF11/MED31/MED16	5	FALSE	2/221	51/7787	0.427087	0.962874
More in resister	GO	GO:0061687	detoxification of inorganic compound	NA	NA	NA	NA	NA	NA	NA	2/130	12/9003	0.012422	0.507482	MT1H/MT1G	2	FALSE	NA	NA	NA	NA	NA	NA	NA	3/275	12/8351	0.00623064	0.150586	MT1G/MT1A/MT1E	3	FALSE	NA	NA	NA	NA	NA	NA	NA	NA	NA	NA	NA	NA	NA	NA	7/221	12/7787	9.47328e-09	9.94407e-07
More in resister	GO	GO:0061844	antimicrobial humoral immune response mediated by antimicrobial peptide	5/419	18/8530	0.00140512	0.0778655	ROMO1/RPL39/CXCL2/CXCL3/RNASE6	5	FALSE	1/130	17/9003	0.219238	0.809563	ROMO1	1	FALSE	NA	NA	NA	NA	NA	NA	NA	4/275	18/8351	0.00244332	0.0928423	RPL39/CXCL2/CXCL8/CXCL3	4	FALSE	5/348	17/8398	0.000486311	0.0312705	CXCL8/RPL39/ROMO1/CXCL2/CXCL3	5	TRUE	2/125	15/8059	0.0219623	0.568292	ROMO1/RPL39	2	FALSE	4/221	16/7787	0.000878304	0.0454096
More in resister	GO	GO:0070098	chemokine-mediated signaling pathway	4/419	29/8530	0.051595	0.871719	CXCL2/CXCL3/CCL3/EDN1	4	FALSE	NA	NA	NA	NA	NA	NA	NA	NA	NA	NA	NA	NA	NA	NA	7/275	31/8351	5.18647e-05	0.00582707	CCL3L1/EDN1/CXCL2/CCRL2/CXCL8/CXCL3/CCL3	7	TRUE	7/348	36/8398	0.000582723	0.0341456	CCL3/CXCL8/CCL3L1/CXCL2/GPR35/EDN1/CXCL3	7	TRUE	NA	NA	NA	NA	NA	NA	NA	2/221	29/7787	0.198414	0.962874
More in resister	GO	GO:0070897	transcription preinitiation complex assembly	10/419	60/8530	0.000608242	0.0618532	TAF11/GTF2A2/MED30/MED7/TAF9/MED10/MED31/MED16/TAF13/MED21	10	FALSE	4/130	62/9003	0.0121439	0.507482	GTF2A2/TAF11/MED30/MED7	4	FALSE	4/61	62/8729	0.000889637	0.0583083	MED30/GTF2A2/MED7/TAF13	4	FALSE	3/275	60/8351	0.316583	0.773562	GTF2A2/MED7/MED10	3	FALSE	9/348	61/8398	0.000836577	0.0451955	GTF2A2/TAF11/MED31/TAF13/MED7/MED10/MED16/MED30/TAF9	9	TRUE	5/125	60/8059	0.0022888	0.174327	MED7/MED10/TAF11/MED31/MED16	5	FALSE	2/221	60/7787	0.511597	0.964467
More in resister	GO	GO:0070972	protein localization to endoplasmic reticulum	8/419	57/8530	0.00631161	0.240456	SEC61G/SRP19/SRP9/SEC62/KDELR2/SRP14/SPCS3/SEC61B	8	FALSE	1/130	59/9003	0.577238	0.863769	SEC61G	1	FALSE	1/61	57/8729	0.330362	0.609214	SEC61G	1	FALSE	8/275	57/8351	0.000508041	0.0335227	SEC61G/INSIG1/SRP14/CHMP4B/SEC61B/VAPA/SRP9/BTF3	8	TRUE	6/348	56/8398	0.0275471	0.378987	SEC61G/SPCS3/KDELR2/SEC61B/SRP19/SRP9	6	FALSE	NA	NA	NA	NA	NA	NA	NA	6/221	56/7787	0.00485127	0.184668
More in resister	GO	GO:0071276	cellular response to cadmium ion	1/419	25/8530	0.716637	0.999986	SUMO1	1	FALSE	2/130	26/9003	0.0536665	0.744215	MT1H/MT1G	2	FALSE	NA	NA	NA	NA	NA	NA	NA	3/275	25/8351	0.0476053	0.434921	MT1G/MT1A/MT1E	3	FALSE	1/348	26/8398	0.667806	0.93862	MMP9	1	FALSE	NA	NA	NA	NA	NA	NA	NA	7/221	24/7787	3.09317e-06	0.000243517
More in resister	GO	GO:0071280	cellular response to copper ion	1/419	17/8530	0.575602	0.999986	PRNP	1	FALSE	2/130	17/9003	0.0244221	0.604909	MT1H/MT1G	2	FALSE	NA	NA	NA	NA	NA	NA	NA	3/275	17/8351	0.0170556	0.28829	MT1G/MT1A/MT1E	3	FALSE	NA	NA	NA	NA	NA	NA	NA	NA	NA	NA	NA	NA	NA	NA	7/221	17/7787	2.05994e-07	1.8778e-05
More in resister	GO	GO:0071294	cellular response to zinc ion	NA	NA	NA	NA	NA	NA	NA	2/130	16/9003	0.0217518	0.604909	MT1H/MT1G	2	FALSE	NA	NA	NA	NA	NA	NA	NA	3/275	15/8351	0.0119789	0.230538	MT1G/MT1A/MT1E	3	FALSE	NA	NA	NA	NA	NA	NA	NA	NA	NA	NA	NA	NA	NA	NA	7/221	15/7787	7.15545e-08	6.88513e-06
More in resister	GO	GO:0071345	cellular response to cytokine stimulus	23/419	467/8530	0.526822	0.999986	IL1R1/IL1RN/BIRC2/GPS2/CSF1/SRSF3/SYNCRIP/CXCL2/CXCL3/CCL3/CYP1B1/EEF1E1/RNMT/OTULIN/EDN1/DUSP1/CLCF1/DPYSL3/FABP4/IL6R/B3GNT2/CDC42/JAGN1	23	FALSE	3/130	474/9003	0.970659	0.979523	IL1R1/IL1RN/CNOT9	3	FALSE	2/61	479/8729	0.85571	0.884965	PDE12/CYP1B1	2	FALSE	29/275	468/8351	0.000722707	0.0453696	IL1R1/CLCF1/F3/DUSP1/DCSTAMP/IL6/IL1RN/FAS/EGR1/FABP4/CCL3L1/EDN1/CSF1/CXCL2/IL6R/CCRL2/CXCL8/B3GNT2/NFYB/CXCL3/ETV3/IL36B/KLF4/YTHDF2/BIRC2/IL7R/JAGN1/CCL3/SPHK1	29	TRUE	20/348	470/8398	0.484749	0.924659	CCL3/SPRY2/CXCL8/IL1R1/IL1RN/CSF1/JAGN1/CCL3L1/SPHK1/CXCL2/SMAD7/EEF1E1/GPR35/PDCD10/BIRC2/EDN1/CXCL3/TNFRSF1B/OTULIN/IL6R	20	FALSE	5/125	432/8059	0.8077	0.978724	IL1RN/CSF1/EEF1E1/CLCF1/B3GNT2	5	FALSE	14/221	428/7787	0.329977	0.962874
More in resister	GO	GO:0071347	cellular response to interleukin-1	4/419	58/8530	0.317916	0.999986	IL1R1/IL1RN/CCL3/EDN1	4	FALSE	2/130	56/9003	0.193564	0.809563	IL1R1/IL1RN	2	FALSE	NA	NA	NA	NA	NA	NA	NA	8/275	62/8351	0.00090194	0.0499915	IL1R1/IL6/IL1RN/EGR1/CCL3L1/EDN1/CXCL8/CCL3	8	TRUE	6/348	58/8398	0.0320768	0.421662	CCL3/CXCL8/IL1R1/IL1RN/CCL3L1/EDN1	6	FALSE	1/125	52/8059	0.557571	0.949037	IL1RN	1	FALSE	3/221	52/7787	0.182721	0.962874
More in resister	GO	GO:0071825	protein-lipid complex subunit organization	2/419	23/8530	0.313038	0.999986	APOC1/APOC2	2	FALSE	NA	NA	NA	NA	NA	NA	NA	NA	NA	NA	NA	NA	NA	NA	5/275	23/8351	0.000771367	0.0453696	SNX9/MFSD2A/APOC2/LPL/APOC1	5	TRUE	2/348	22/8398	0.230965	0.896736	MFSD2A/SNX9	2	FALSE	1/125	21/8059	0.280131	0.949037	MFSD2A	1	FALSE	4/221	22/7787	0.00308863	0.132087
More in resister	GO	GO:0071826	ribonucleoprotein complex subunit organization	25/419	189/8530	5.32715e-06	0.00191112	EIF3J/SNRPB2/RPS27/SNRPF/RPL38/EIF6/TAF9/RPF2/MCTS1/BRIX1/SRSF6/SNRPD1/SNRPE/RPS27L/WDR77/RPL24/DHX30/RPS28/RAMAC/MRPL20/SF3A2/SNRPG/SF3B6/NUDT21/SNRPD2	25	TRUE	8/130	192/9003	0.00655786	0.507482	EIF3J/SNRPF/EIF6/RPF2/RPL38/SNRPD1/BRIX1/RPS27	8	FALSE	1/61	191/8729	0.741866	0.815859	EIF6	1	FALSE	10/275	184/8351	0.0822556	0.508354	RPL38/RPS27/RPS28/SNRPF/RPL6/EIF3J/EIF6/RPL24/DYRK3/RAMAC	10	FALSE	17/348	189/8398	0.00212941	0.0874192	RPL38/RPS27/EIF6/RPS28/RAMAC/EIF3J/DYRK3/SNRPG/SNRPE/SNRPF/SF3B4/SNRPB2/RPL24/SNRPD1/SF3A2/TAF9/SF3B6	17	FALSE	8/125	184/8059	0.00769863	0.319046	RAMAC/RPL38/EIF6/RPS27/SF3B4/NUDT21/RPL24/RPF2	8	FALSE	11/221	184/7787	0.0154897	0.412741
More in resister	GO	GO:0072330	monocarboxylic acid biosynthetic process	6/419	102/8530	0.385815	0.999986	MID1IP1/EIF6/APOC1/APOC2/EDN1/SCD	6	FALSE	2/130	103/9003	0.440021	0.829774	EIF6/ACACA	2	FALSE	1/61	100/8729	0.506037	0.682673	EIF6	1	FALSE	12/275	97/8351	7.50594e-05	0.00725632	FABP5/EDN1/APOC2/LPL/INSIG1/SCD/MID1IP1/DHRS9/EIF6/RDH10/APOC1/ANXA1	12	TRUE	4/348	96/8398	0.567391	0.934636	EIF6/MID1IP1/PRKAG2/EDN1	4	FALSE	3/125	94/8059	0.17881	0.949037	EIF6/FABP5/MID1IP1	3	FALSE	5/221	88/7787	0.104427	0.962874
More in resister	GO	GO:0072522	purine-containing compound biosynthetic process	14/419	176/8530	0.0508925	0.871719	NDUFB1/NDUFA3/ATP5ME/UQCC3/ATP5F1E/ADAL/NCS1/ATP6V0C/MT-ATP8/ALDOA/HPRT1/MT-ND2/ATP5MF/MT-ND4L	14	FALSE	3/130	178/9003	0.476538	0.842926	NCS1/ACACA/NDUFB1	3	FALSE	NA	NA	NA	NA	NA	NA	NA	12/275	175/8351	0.0127671	0.240149	NDUFB1/NDUFA3/ATP5F1E/ATP5ME/ALDOA/NDUFA1/PNP/MT-ATP8/MPC2/DMAC2L/ATP6V0C/ATP5MF	12	FALSE	18/348	178/8398	0.000402567	0.0274365	ATP5F1E/NDUFB1/MT-ATP8/PRKAG2/NCS1/NDUFA3/ATP5MF/TGFB1/ATP6V0C/UQCC3/ALDOA/ATP5ME/ADAL/NDUFA1/NDUFC1/HPRT1/MT-ND4L/MPC2	18	TRUE	1/125	168/8059	0.929632	0.98936	ATP5ME	1	FALSE	7/221	166/7787	0.192399	0.962874
More in resister	GO	GO:0086009	membrane repolarization	3/419	14/8530	0.0285845	0.612219	YWHAE/NEDD4L/WDR1	3	FALSE	2/130	14/9003	0.0168079	0.538897	NEDD4L/YWHAE	2	FALSE	1/61	13/8729	0.0871909	0.530843	NEDD4L	1	FALSE	2/275	14/8351	0.0757856	0.4966	NEDD4L/YWHAE	2	FALSE	5/348	12/8398	7.39067e-05	0.00818517	NEDD4L/WDR1/YWHAE/ATP1A1/FLNA	5	TRUE	1/125	13/8059	0.184024	0.949037	NEDD4L	1	FALSE	2/221	13/7787	0.0509146	0.787358
More in resister	GO	GO:0097501	stress response to metal ion	NA	NA	NA	NA	NA	NA	NA	2/130	12/9003	0.012422	0.507482	MT1H/MT1G	2	FALSE	NA	NA	NA	NA	NA	NA	NA	3/275	12/8351	0.00623064	0.150586	MT1G/MT1A/MT1E	3	FALSE	NA	NA	NA	NA	NA	NA	NA	NA	NA	NA	NA	NA	NA	NA	7/221	12/7787	9.47328e-09	9.94407e-07
More in resister	GO	GO:0097529	myeloid leukocyte migration	11/419	127/8530	0.0474562	0.847714	IL1R1/CSF1/CXCL2/CXCL3/WDR1/CCL3/EDN1/DUSP1/C1QBP/IL6R/JAGN1	11	FALSE	3/130	126/9003	0.273841	0.809563	IL1R1/C1QBP/PTK2	3	FALSE	1/61	127/8729	0.592262	0.730689	C1QBP	1	FALSE	14/275	126/8351	6.38711e-05	0.006808	IL1R1/DUSP1/IL6/CCL3L1/EDN1/CSF1/CXCL2/IL6R/CXCL8/CXCL3/JAGN1/VEGFA/CCL3/ANXA1	14	TRUE	13/348	130/8398	0.00277594	0.103997	CCL3/CXCL8/IL1R1/CSF1/JAGN1/CCL3L1/WDR1/CXCL2/C1QBP/EDN1/CXCL3/RAC2/IL6R	13	FALSE	1/125	111/8059	0.825742	0.980136	CSF1	1	FALSE	5/221	114/7787	0.222646	0.962874
More in resister	GO	GO:0097530	granulocyte migration	9/419	86/8530	0.024749	0.572819	IL1R1/CSF1/CXCL2/CXCL3/WDR1/CCL3/EDN1/C1QBP/JAGN1	9	FALSE	3/130	85/9003	0.124424	0.809563	IL1R1/C1QBP/PTK2	3	FALSE	1/61	87/8729	0.458355	0.665134	C1QBP	1	FALSE	10/275	86/8351	0.000494759	0.0331728	IL1R1/CCL3L1/EDN1/CSF1/CXCL2/CXCL8/CXCL3/JAGN1/CCL3/ANXA1	10	TRUE	12/348	90/8398	0.000314465	0.022469	CCL3/CXCL8/IL1R1/CSF1/JAGN1/CCL3L1/WDR1/CXCL2/C1QBP/EDN1/CXCL3/RAC2	12	TRUE	1/125	73/8059	0.682195	0.965393	CSF1	1	FALSE	4/221	78/7787	0.180259	0.962874
More in resister	GO	GO:0098754	detoxification	4/419	71/8530	0.463735	0.999986	SELENOS/CYGB/TXN/GSTM3	4	FALSE	6/130	71/9003	0.000536483	0.224429	SELENOS/CYGB/GSTM3/MT1H/TXN/MT1G	6	FALSE	2/61	69/8729	0.083684	0.530843	SELENOS/TXN	2	FALSE	6/275	69/8351	0.0255968	0.347731	SELENOS/GSTM3/MT1G/TXN/MT1A/MT1E	6	FALSE	4/348	68/8398	0.310917	0.924659	GSTM3/SELENOS/TXN/NQO1	4	FALSE	3/125	68/8059	0.0884092	0.949037	GSTM3/SELENOS/TXN	3	FALSE	11/221	66/7787	2.0414e-06	0.000176785
More in resister	GO	GO:1903241	U2-type prespliceosome assembly	8/419	24/8530	1.16296e-05	0.0027814	SNRPB2/SNRPF/SNRPD1/SNRPE/SF3A2/SNRPG/SF3B6/SNRPD2	8	TRUE	2/130	24/9003	0.046429	0.744215	SNRPF/SNRPD1	2	FALSE	NA	NA	NA	NA	NA	NA	NA	1/275	24/8351	0.552804	0.813644	SNRPF	1	FALSE	8/348	24/8398	3.29496e-06	0.000768245	SNRPG/SNRPE/SNRPF/SF3B4/SNRPB2/SNRPD1/SF3A2/SF3B6	8	TRUE	1/125	24/8059	0.3132	0.949037	SF3B4	1	FALSE	3/221	24/7787	0.0294179	0.594296
More in resister	GO	GO:1903955	positive regulation of protein targeting to mitochondrion	7/419	29/8530	0.000399284	0.0491119	ARIH2/PDCD5/RHOU/UBL5/SH3GLB1/TOMM7/BAP1	7	TRUE	1/130	29/9003	0.34457	0.809563	PDCD5	1	FALSE	NA	NA	NA	NA	NA	NA	NA	4/275	28/8351	0.0126326	0.238699	UBL5/RHOU/TOMM7/UBE2D3	4	FALSE	4/348	28/8398	0.0270303	0.374712	PDCD5/TOMM7/UBL5/RAC2	4	FALSE	1/125	28/8059	0.354959	0.949037	RHOU	1	FALSE	4/221	28/7787	0.00756984	0.252134
More in resister	GO	GO:1990169	stress response to copper ion	NA	NA	NA	NA	NA	NA	NA	2/130	10/9003	0.00863086	0.507482	MT1H/MT1G	2	FALSE	NA	NA	NA	NA	NA	NA	NA	3/275	10/8351	0.00356877	0.112389	MT1G/MT1A/MT1E	3	FALSE	NA	NA	NA	NA	NA	NA	NA	NA	NA	NA	NA	NA	NA	NA	7/221	10/7787	1.50694e-09	1.80002e-07
More in resister	GO	GO:1990266	neutrophil migration	8/419	72/8530	0.0242281	0.566859	IL1R1/CXCL2/CXCL3/WDR1/CCL3/EDN1/C1QBP/JAGN1	8	FALSE	2/130	71/9003	0.273591	0.809563	IL1R1/C1QBP	2	FALSE	1/61	73/8729	0.401937	0.642652	C1QBP	1	FALSE	8/275	73/8351	0.00262639	0.0966185	IL1R1/CCL3L1/EDN1/CXCL2/CXCL8/CXCL3/JAGN1/CCL3	8	FALSE	11/348	78/8398	0.000339589	0.023879	CCL3/CXCL8/IL1R1/JAGN1/CCL3L1/WDR1/CXCL2/C1QBP/EDN1/CXCL3/RAC2	11	TRUE	NA	NA	NA	NA	NA	NA	NA	3/221	67/7787	0.296128	0.962874
More in resister	GO	GO:1990868	response to chemokine	5/419	35/8530	0.0268673	0.602416	CXCL2/CXCL3/CCL3/EDN1/DUSP1	5	FALSE	NA	NA	NA	NA	NA	NA	NA	NA	NA	NA	NA	NA	NA	NA	8/275	37/8351	2.09998e-05	0.00264534	DUSP1/CCL3L1/EDN1/CXCL2/CCRL2/CXCL8/CXCL3/CCL3	8	TRUE	7/348	43/8398	0.00175375	0.0772231	CCL3/CXCL8/CCL3L1/CXCL2/GPR35/EDN1/CXCL3	7	FALSE	NA	NA	NA	NA	NA	NA	NA	2/221	35/7787	0.261693	0.962874
More in resister	GO	GO:1990869	cellular response to chemokine	5/419	35/8530	0.0268673	0.602416	CXCL2/CXCL3/CCL3/EDN1/DUSP1	5	FALSE	NA	NA	NA	NA	NA	NA	NA	NA	NA	NA	NA	NA	NA	NA	8/275	37/8351	2.09998e-05	0.00264534	DUSP1/CCL3L1/EDN1/CXCL2/CCRL2/CXCL8/CXCL3/CCL3	8	TRUE	7/348	43/8398	0.00175375	0.0772231	CCL3/CXCL8/CCL3L1/CXCL2/GPR35/EDN1/CXCL3	7	FALSE	NA	NA	NA	NA	NA	NA	NA	2/221	35/7787	0.261693	0.962874
More in resister	GO	GO:2000142	regulation of DNA-templated transcription initiation	10/419	66/8530	0.00130886	0.0751285	TAF11/GTF2A2/MED30/MED7/TAF9/MED10/MED31/MED16/TAF13/MED21	10	FALSE	4/130	68/9003	0.0165987	0.538897	GTF2A2/TAF11/MED30/MED7	4	FALSE	4/61	68/8729	0.00125888	0.0714007	MED30/GTF2A2/MED7/TAF13	4	FALSE	4/275	66/8351	0.172034	0.672939	GTF2A2/SUB1/MED7/MED10	4	FALSE	11/348	68/8398	9.69301e-05	0.010111	GTF2A2/TAF11/MED31/TAF13/MED7/MED10/MED16/MED30/ERCC1/SUB1/TAF9	11	TRUE	5/125	66/8059	0.00347907	0.204157	MED7/MED10/TAF11/MED31/MED16	5	FALSE	2/221	64/7787	0.546461	0.964467
More in resister	GO	GO:2000144	positive regulation of DNA-templated transcription initiation	10/419	57/8530	0.000397386	0.0491119	TAF11/GTF2A2/MED30/MED7/TAF9/MED10/MED31/MED16/TAF13/MED21	10	TRUE	4/130	59/9003	0.0102401	0.507482	GTF2A2/TAF11/MED30/MED7	4	FALSE	4/61	59/8729	0.000737237	0.0552225	MED30/GTF2A2/MED7/TAF13	4	FALSE	4/275	57/8351	0.117519	0.567393	GTF2A2/SUB1/MED7/MED10	4	FALSE	11/348	59/8398	2.47168e-05	0.00391055	GTF2A2/TAF11/MED31/TAF13/MED7/MED10/MED16/MED30/ERCC1/SUB1/TAF9	11	TRUE	5/125	57/8059	0.00182071	0.174327	MED7/MED10/TAF11/MED31/MED16	5	FALSE	2/221	55/7787	0.465632	0.962874
More in resister	Kegg	hsa00190	Oxidative phosphorylation	13/212	116/4154	0.00567855	0.226353	MT-ND2/MT-ND4L/MT-ATP8/NDUFA3/NDUFA3/NDUFA3/NDUFA3/NDUFA3/NDUFA3/NDUFA3/NDUFA3/NDUFA3/ATP5F1E/COX7B/UQCRB/NDUFB1/CYCS/ATP6V0C/ATP5MF/NDUFA3/COX17/ATP5ME	13	FALSE	2/64	117/4362	0.516508	0.851372	NDUFB1/COX17	2	FALSE	2023-01-24	117/4236	0.490372	0.675433	COX17	1	FALSE	15/170	116/4090	7.21104e-05	0.00713722	MT-ATP8/NDUFA3/NDUFA3/NDUFA3/NDUFA3/NDUFA3/NDUFA3/NDUFA3/NDUFA3/NDUFA3/ATP5F1E/COX7C/COX7B/UQCRB/NDUFA1/UQCRH/NDUFB1/CYCS/COX6C/ATP6V0C/ATP5MF/NDUFA3/COX17/ATP5ME	15	TRUE	15/186	115/4098	0.000177876	0.0154508	MT-ND4L/MT-ATP8/NDUFA3/NDUFA3/NDUFA3/NDUFA3/NDUFA3/NDUFA3/NDUFA3/NDUFA3/NDUFA3/ATP5F1E/COX7B/NDUFA1/NDUFB1/COX7A2L/NDUFC1/ATP6V0C/ATP5MF/NDUFA3/COX17/COX7A2/ATP5ME/UQCR11	15	TRUE	2/60	115/3923	0.529963	0.949037	CYCS/ATP5ME	2	FALSE	9/130	116/3812	0.0164966	0.425833
More in resister	Kegg	hsa03010	Ribosome	19/212	127/4154	1.73911e-05	0.00374343	MRPL36/RPS21/RPL39/RPL22/MRPL19/RPS28/MRPL12/RSL24D1/RPS29/RPL37/RPL36/RPS27L/MRPL30/RPL38/RPS27/MRPL20/RPL24/RPL37A/MRPL33	19	TRUE	5/64	127/4362	0.0375183	0.740257	RSL24D1/RPS29/RPL38/RPS27/MRPL33	5	FALSE	2023-01-24	127/4236	0.51933	0.689925	MRPL19	1	FALSE	19/170	127/4090	7.90141e-07	0.000218974	RPS17/MRPL36/RPS21/RPS15A/RPL39/RPL22/MRPL19/RPS28/RSL24D1/RPS29/RPL37/RPL36/RPS17/RPL38/RPS27/RPL6/RPL35A/RPL24/RPL37A/MRPL33	19	TRUE	19/186	127/4098	3.0631e-06	0.000753862	RPS21/RPL39/RPL22/RPS28/MRPL12/RPLP2/RSL24D1/MRPS18C/RPL34/RPS29/RPL37/RPL36/RPL38/RPS27/RPL41/RPL35A/RPL24/RPL37A/MRPL33	19	TRUE	9/60	127/3923	0.000107486	0.034933	RPL39/RSL24D1/MRPS18C/RPS29/RPL38/RPS27/RPL24/RPL37A/MRPL33	9	TRUE	24/130	127/3812	1.97015e-12	3.79144e-10
More in resister	Kegg	hsa03040	Spliceosome	22/212	126/4154	2.36151e-07	0.000203326	SNRPB2/SRSF6/SRSF3/SNRPD1/LSM3/MAGOHB/MAGOH/LSM5/PRPF38A/LSM7/ALYREF/SNRPD2/SNRPE/SF3A2/SNRPG/TRA2B/SNRNP27/PCBP1/SYF2/LSM8/SNRPF/SF3B6	22	TRUE	3/64	125/4362	0.277433	0.809563	SNRPD1/PRPF38A/SNRPF	3	FALSE	NA	NA	NA	NA	NA	NA	NA	7/170	126/4090	0.26876	0.773562	PRPF38A/DDX5/TRA2B/SNRNP27/NCBP2/SYF2/SNRPF	7	FALSE	14/186	124/4098	0.00128642	0.0633204	SNRPB2/SNRPD1/MAGOHB/LSM7/ALYREF/SNRPE/SF3A2/SNRPG/U2AF2/TRA2B/NCBP2/SF3B4/SNRPF/SF3B6	14	FALSE	4/60	124/3923	0.120147	0.949037	MAGOHB/SNRNP40/MAGOH/SF3B4	4	FALSE	5/130	123/3812	0.410286	0.962874
More in resister	Kegg	hsa03060	Protein export	8/212	22/4154	6.94121e-06	0.00213442	SEC61G/SRP14/SPCS3/SRP19/SEC61B/SEC11A/SEC62/SRP9	8	TRUE	1/64	23/4362	0.288818	0.809563	SEC61G	1	FALSE	2023-01-24	22/4236	0.117779	0.530843	SEC61G	1	FALSE	4/170	22/4090	0.0117176	0.230538	SEC61G/SRP14/SEC61B/SRP9	4	FALSE	5/186	22/4098	0.00255645	0.0993426	SEC61G/SPCS3/SRP19/SEC61B/SRP9	5	FALSE	NA	NA	NA	NA	NA	NA	NA	5/130	22/3812	0.000704677	0.0375539
More in resister	Kegg	hsa04060	Cytokine-cytokine receptor interaction	8/212	85/4154	0.0665992	0.999986	CCL3/CCL3/CSF1/CLCF1/CXCL2/IL1R1/CXCL3/CCL3/IL1RN/IL6R	8	FALSE	2/64	86/4362	0.361157	0.817734	IL1R1/IL1RN	2	FALSE	NA	NA	NA	NA	NA	NA	NA	15/170	87/4090	1.98581e-06	0.000343959	CCL3L1/CCL3L1/CCL3L1/CCL3L1/CCL3/CCL3/CCL3L1/CCL3L1/IL7R/CSF1/CLCF1/CXCL2/FAS/IL1R1/CXCL3/CXCL8/IL6/CCL3L3/CCL3L3/CCL3/IL1RN/IL36B/IL6R	15	TRUE	13/186	89/4098	0.000153718	0.0136194	CCL3L1/CCL3L1/CCL3L1/CCL3L1/CCL3/CCL3/CCL3L1/CCL3L1/TNFRSF1B/TNFSF14/CSF1/TGFB1/CXCL2/IL1R1/CXCL3/CXCL8/CCL3L3/CCL3L3/CCL3/IL1RN/IL6R	13	TRUE	3/60	73/3923	0.0997973	0.949037	CSF1/CLCF1/IL1RN	3	FALSE	7/130	75/3812	0.0131672	0.373863
More in resister	Kegg	hsa04061	Viral protein interaction with cytokine and cytokine receptor	5/212	36/4154	0.0342373	0.678758	CCL3/CCL3/CSF1/CXCL2/CXCL3/CCL3/IL6R	5	FALSE	NA	NA	NA	NA	NA	NA	NA	NA	NA	NA	NA	NA	NA	NA	9/170	38/4090	1.7252e-05	0.00231344	CCL3L1/CCL3L1/CCL3L1/CCL3L1/CCL3/CCL3/CCL3L1/CCL3L1/CSF1/CXCL2/CXCL3/CXCL8/IL6/CCL3L3/CCL3L3/CCL3/IL6R	9	TRUE	10/186	40/4098	7.52277e-06	0.00138858	CCL3L1/CCL3L1/CCL3L1/CCL3L1/CCL3/CCL3/CCL3L1/CCL3L1/TNFRSF1B/TNFSF14/CSF1/CXCL2/CXCL3/CXCL8/CCL3L3/CCL3L3/CCL3/IL6R	10	TRUE	1/60	30/3923	0.371305	0.949037	CSF1	1	FALSE	4/130	32/3812	0.0221618	0.50439
More in resister	Kegg	hsa04714	Thermogenesis	20/212	183/4154	0.00087782	0.0699817	MT-ND2/MT-ND4L/MT-ATP8/NDUFA3/NDUFA3/NDUFA3/NDUFA3/NDUFA3/NDUFA3/NDUFA3/NDUFA3/NDUFA3/ATP5F1E/COX7B/UQCRB/NDUFAF4/COA3/COX19/MAP2K3/NDUFB1/COX16/RHEB/NDUFAF2/ATP5MF/NDUFA3/COX17/ATP5ME/NRAS/COX20	20	FALSE	4/64	183/4362	0.280468	0.809563	NDUFAF4/NDUFB1/COX17/COX20	4	FALSE	2023-02-24	183/4236	0.278023	0.600471	COX17/COX20	2	FALSE	16/170	183/4090	0.00346684	0.112389	MT-ATP8/NDUFA3/NDUFA3/NDUFA3/NDUFA3/NDUFA3/NDUFA3/NDUFA3/NDUFA3/NDUFA3/ATP5F1E/COX7C/COX7B/UQCRB/MAP2K3/NDUFA1/UQCRH/NDUFB1/COX16/COX6C/RHEB/ATP5MF/NDUFA3/COX17/ATP5ME	16	FALSE	20/186	183/4098	0.000185192	0.015777	MT-ND4L/MT-ATP8/NDUFA3/NDUFA3/NDUFA3/NDUFA3/NDUFA3/NDUFA3/NDUFA3/NDUFA3/NDUFA3/ATP5F1E/COX7B/NDUFAF4/MAP2K3/NDUFA1/NDUFB1/COX7A2L/COX16/NDUFC1/RHEB/PRKAG2/ATP5MF/NDUFA3/COX17/COX7A2/ATP5ME/UQCR11/COX20	20	TRUE	2/60	182/3923	0.775684	0.969496	NDUFAF4/ATP5ME	2	FALSE	12/130	180/3812	0.0186058	0.453877
More in resister	Kegg	hsa04978	Mineral absorption	NA	NA	NA	NA	NA	NA	NA	2/64	26/4362	0.0549606	0.753251	MT1H/MT1G	2	FALSE	NA	NA	NA	NA	NA	NA	NA	3/170	26/4090	0.0911826	0.515008	MT1E/MT1A/MT1G	3	FALSE	3/186	26/4098	0.111467	0.715696	ATP1A1/VDR/ATP2B4	3	FALSE	NA	NA	NA	NA	NA	NA	NA	7/130	24/3812	9.7355e-06	0.00068824
More in resister	Kegg	hsa05016	Huntington disease	13/212	229/4154	0.386068	0.999986	MT-ND2/MT-ND4L/MT-ATP8/NDUFA3/NDUFA3/NDUFA3/NDUFA3/NDUFA3/NDUFA3/NDUFA3/NDUFA3/NDUFA3/ATP5F1E/POLR2K/COX7B/UQCRB/NDUFB1/CYCS/POLR2L/DNAL1/NDUFA3/SEM1	13	FALSE	2/64	234/4362	0.866157	0.94024	NDUFB1/DNAL1	2	FALSE	2023-01-24	232/4236	0.742208	0.815859	DNAL1	1	FALSE	15/170	230/4090	0.0531795	0.451158	MT-ATP8/NDUFA3/NDUFA3/NDUFA3/NDUFA3/NDUFA3/NDUFA3/NDUFA3/NDUFA3/NDUFA3/ATP5F1E/COX7C/POLR2K/COX7B/UQCRB/NDUFA1/UQCRH/NDUFB1/CYCS/COX6C/PPIF/POLR2L/NDUFA3/SEM1	15	FALSE	13/186	231/4098	0.247951	0.921058	MT-ND4L/MT-ATP8/NDUFA3/NDUFA3/NDUFA3/NDUFA3/NDUFA3/NDUFA3/NDUFA3/NDUFA3/NDUFA3/ATP5F1E/COX7B/NDUFA1/NDUFB1/COX7A2L/NDUFC1/POLR2L/NDUFA3/COX7A2/UQCR11/SEM1	13	FALSE	2/60	225/3923	0.867605	0.984811	CYCS/POLR2L	2	FALSE	10/130	223/3812	0.227688	0.962874
More in resister	Kegg	hsa05171	Coronavirus disease - COVID-19	15/212	168/4154	0.0232144	0.557013	CFD/RPS21/RPL39/RPL22/RPS28/RSL24D1/RPS29/RPL37/RPL36/RPS27L/RPL38/RPS27/CFD/RPL24/RPL37A/IL6R	15	FALSE	4/64	167/4362	0.228582	0.809563	RSL24D1/RPS29/RPL38/RPS27	4	FALSE	NA	NA	NA	NA	NA	NA	NA	20/170	167/4090	1.37779e-05	0.00190915	RPS17/CFD/RPS21/RPS15A/RPL39/RPL22/RPS28/RSL24D1/RPS29/RPL37/RPL36/RPS17/CXCL8/RPL38/RPS27/CFD/RPL6/IL6/RPL35A/RPL24/RPL37A/IL6R	20	TRUE	20/186	166/4098	4.65146e-05	0.00606058	CFD/RPS21/RPL39/RPL22/RPS28/RPLP2/RSL24D1/RPL34/RPS29/RPL37/RPL36/CXCL8/RPL38/RPS27/C3/CFD/RPL41/RPL35A/RPL24/RPL37A/IL6R	20	TRUE	8/60	162/3923	0.00291147	0.194811	CFD/RPL39/RSL24D1/RPS29/RPL38/RPS27/CFD/RPL24/RPL37A	8	FALSE	25/130	161/3812	6.15434e-11	8.88277e-09
More in resister	Kegg	hsa05323	Rheumatoid arthritis	5/212	61/4154	0.198727	0.999986	CCL3/CCL3/ATP6V0C/CSF1/CXCL2/CXCL3/CCL3	5	FALSE	1/64	60/4362	0.590554	0.863769	CTSL	1	FALSE	2023-01-24	63/4236	0.302748	0.60657	CTSL	1	FALSE	13/170	62/4090	9.80842e-07	0.000254835	CCL3L1/CCL3L1/CCL3L1/CCL3L1/CCL3/HLA-DQA2/HLA-DQA2/HLA-DQA1/HLA-DQA2/HLA-DQA2/HLA-DQA2/HLA-DQA2/HLA-DQA1/HLA-DQA2/HLA-DQA2/CCL3/CCL3L1/CCL3L1/HLA-DQA2/HLA-DQA2/HLA-DQA2/HLA-DQA2/HLA-DQA1/HLA-DQA2/HLA-DQA2/HLA-DQA1/HLA-DQA1/CTSL/HLA-DQA2/HLA-DQA2/ATP6V0C/CSF1/HLA-DQA1/CXCL2/VEGFA/CXCL3/CXCL8/IL6/CCL3L3/CCL3L3/CCL3	13	TRUE	10/186	60/4098	0.000302698	0.0223492	CCL3L1/CCL3L1/CCL3L1/CCL3L1/CCL3/CCL3/CCL3L1/CCL3L1/CTSL/ATP6V0C/CSF1/TGFB1/CXCL2/CXCL3/CXCL8/CCL3L3/CCL3L3/CCL3	10	TRUE	2/60	57/3923	0.216446	0.949037	CTSL/CSF1	2	FALSE	3/130	59/3812	0.326567	0.962874
More in resister	Reactome	R-HSA-112409	RAF-independent MAPK1/3 activation	3/293	18/5794	0.0594714	0.968793	DUSP1/PEA15/IL6R	3	FALSE	NA	NA	NA	NA	NA	NA	NA	NA	NA	NA	NA	NA	NA	NA	5/207	18/5681	0.000355662	0.0250591	DUSP5/DUSP1/PEA15/IL6/IL6R	5	TRUE	2/236	16/5723	0.139227	0.767824	PEA15/IL6R	2	FALSE	NA	NA	NA	NA	NA	NA	NA	2/153	15/5333	0.0672565	0.832058
More in resister	Reactome	R-HSA-1266738	Developmental Biology	35/293	499/5794	0.027755	0.610449	MED16/MED10/RPS21/MYL12B/PRNP/TFDP1/MED31/POLR2K/MED30/MAGOHB/SDC2/DPYSL3/MED21/RPL39/RPL22/MAGOH/RPS28/POLR2L/ELOC/FABP4/RPS29/RPL37/RPL36/MED7/RPS27L/RPL38/ARPC4/RPS27/MED16/SEM1/NRAS/RPL24/RPL37A/RHOC/CDC42/IL6R	35	FALSE	NA	NA	NA	NA	NA	NA	NA	NA	NA	NA	NA	NA	NA	NA	29/207	499/5681	0.00739263	0.170729	RPS17/MED10/RPS21/LPL/POLR2K/RPS15A/MYC/KLF4/RPL39/RPL22/RPS28/POLR2L/ELOC/FABP4/KRT10/RPS29/RPL37/RPL36/MED7/RPS17/RPL38/RPS27/SEM1/RPL6/NCBP2/RPL35A/RPL24/RPL37A/RHOC/IL6R	29	FALSE	NA	NA	NA	NA	NA	NA	NA	16/86	473/5478	0.00244231	0.174327	MED16/MED10/MYL12B/MED31/MAGOHB/RPL39/MAGOH/POLR2L/EGR2/RPS29/MED7/RPL38/RPS27/MED16/RPL24/RPL37A/RHOC	16	FALSE	33/153	469/5333	7.56651e-07	6.72061e-05
More in resister	Reactome	R-HSA-1428517	The citric acid (TCA) cycle and respiratory electron transport	16/293	162/5794	0.00748062	0.275248	MT-ND2/MT-ATP8/NDUFA3/NDUFA3/NDUFA3/NDUFA3/NDUFA3/NDUFA3/NDUFA3/NDUFA3/NDUFA3/ATP5F1E/COX7B/UQCRB/NDUFAF4/COX19/GLO1/NDUFB1/COX16/CYCS/NDUFAF2/ATP5MF/NDUFA3/ATP5ME/COX20	16	FALSE	3/87	165/6080	0.422015	0.826181	NDUFAF4/NDUFB1/COX20	3	FALSE	1/38	164/5908	0.658077	0.765592	COX20	1	FALSE	17/207	161/5681	6.73535e-05	0.00699971	MT-ATP8/NDUFA3/NDUFA3/NDUFA3/NDUFA3/NDUFA3/NDUFA3/NDUFA3/NDUFA3/NDUFA3/ATP5F1E/COX7C/COX7B/UQCRB/GLO1/NDUFA1/UQCRH/NDUFB1/COX16/CYCS/COX6C/DMAC2L/MPC2/ATP5MF/NDUFA3/ATP5ME	17	TRUE	15/236	163/5723	0.00279066	0.103997	MT-ATP8/NDUFA3/NDUFA3/NDUFA3/NDUFA3/NDUFA3/NDUFA3/NDUFA3/NDUFA3/NDUFA3/ATP5F1E/COX7B/NDUFAF4/NDUFA1/NDUFB1/COX7A2L/COX16/NDUFC1/MPC2/ATP5MF/NDUFA3/ATP5ME/UQCR11/COX20	15	FALSE	3/86	161/5478	0.466264	0.949037	NDUFAF4/CYCS/ATP5ME	3	FALSE	11/153	160/5333	0.00594084	0.209991
More in resister	Reactome	R-HSA-156827	L13a-mediated translational silencing of Ceruloplasmin expression	14/293	105/5794	0.000746056	0.0658419	RPS21/RPL39/RPL22/RPS28/EIF3J/EIF4E/RPS29/RPL37/RPL36/RPS27L/RPL38/RPS27/RPL24/RPL37A	14	FALSE	4/87	106/6080	0.0647303	0.794509	EIF3J/RPS29/RPL38/RPS27	4	FALSE	NA	NA	NA	NA	NA	NA	NA	17/207	105/5681	1.75676e-07	0.000123756	RPS17/RPS21/RPS15A/RPL39/RPL22/RPS28/EIF1AX/EIF3J/RPS29/RPL37/RPL36/RPS17/RPL38/RPS27/RPL6/RPL35A/RPL24/RPL37A	17	TRUE	17/236	105/5723	1.03594e-06	0.00056287	RPS21/RPL39/RPL22/RPS28/RPLP2/EIF3J/RPL34/EIF4E/RPS29/RPL37/RPL36/RPL38/RPS27/RPL41/RPL35A/RPL24/RPL37A	17	TRUE	6/86	105/5478	0.00584833	0.274568	RPL39/RPS29/RPL38/RPS27/RPL24/RPL37A	6	FALSE	22/153	105/5333	8.34903e-14	2.8921e-11
More in resister	Reactome	R-HSA-156842	Eukaryotic Translation Elongation	12/293	87/5794	0.00130622	0.0751285	RPS21/RPL39/RPL22/RPS28/RPS29/RPL37/RPL36/RPS27L/RPL38/RPS27/RPL24/RPL37A	12	FALSE	3/87	87/6080	0.127923	0.809563	RPS29/RPL38/RPS27	3	FALSE	NA	NA	NA	NA	NA	NA	NA	15/207	87/5681	4.12614e-07	0.000142936	RPS17/RPS21/RPS15A/RPL39/RPL22/RPS28/RPS29/RPL37/RPL36/RPS17/RPL38/RPS27/RPL6/RPL35A/RPL24/RPL37A	15	TRUE	15/236	87/5723	2.01475e-06	0.000595024	RPS21/RPL39/RPL22/RPS28/RPLP2/RPL34/RPS29/RPL37/RPL36/RPL38/RPS27/RPL41/RPL35A/RPL24/RPL37A	15	TRUE	6/86	87/5478	0.00229596	0.174327	RPL39/RPS29/RPL38/RPS27/RPL24/RPL37A	6	FALSE	21/153	87/5333	1.56032e-14	7.72137e-12
More in resister	Reactome	R-HSA-156902	Peptide chain elongation	12/293	84/5794	0.000953031	0.0715204	RPS21/RPL39/RPL22/RPS28/RPS29/RPL37/RPL36/RPS27L/RPL38/RPS27/RPL24/RPL37A	12	FALSE	3/87	84/6080	0.11845	0.809563	RPS29/RPL38/RPS27	3	FALSE	NA	NA	NA	NA	NA	NA	NA	15/207	84/5681	2.55806e-07	0.000123756	RPS17/RPS21/RPS15A/RPL39/RPL22/RPS28/RPS29/RPL37/RPL36/RPS17/RPL38/RPS27/RPL6/RPL35A/RPL24/RPL37A	15	TRUE	15/236	84/5723	1.26652e-06	0.00056287	RPS21/RPL39/RPL22/RPS28/RPLP2/RPL34/RPS29/RPL37/RPL36/RPL38/RPS27/RPL41/RPL35A/RPL24/RPL37A	15	TRUE	6/86	84/5478	0.00191858	0.174327	RPL39/RPS29/RPL38/RPS27/RPL24/RPL37A	6	FALSE	21/153	84/5333	7.2435e-15	7.72137e-12
More in resister	Reactome	R-HSA-163200	Respiratory electron transport, ATP synthesis by chemiosmotic coupling, and heat production by uncoupling proteins.	15/293	121/5794	0.00105563	0.0715204	MT-ND2/MT-ATP8/NDUFA3/NDUFA3/NDUFA3/NDUFA3/NDUFA3/NDUFA3/NDUFA3/NDUFA3/NDUFA3/ATP5F1E/COX7B/UQCRB/NDUFAF4/COX19/NDUFB1/COX16/CYCS/NDUFAF2/ATP5MF/NDUFA3/ATP5ME/COX20	15	FALSE	3/87	122/6080	0.253656	0.809563	NDUFAF4/NDUFB1/COX20	3	FALSE	1/38	121/5908	0.545631	0.705041	COX20	1	FALSE	15/207	120/5681	2.5527e-05	0.00312105	MT-ATP8/NDUFA3/NDUFA3/NDUFA3/NDUFA3/NDUFA3/NDUFA3/NDUFA3/NDUFA3/NDUFA3/ATP5F1E/COX7C/COX7B/UQCRB/NDUFA1/UQCRH/NDUFB1/COX16/CYCS/COX6C/DMAC2L/ATP5MF/NDUFA3/ATP5ME	15	TRUE	14/236	121/5723	0.000411957	0.0276511	MT-ATP8/NDUFA3/NDUFA3/NDUFA3/NDUFA3/NDUFA3/NDUFA3/NDUFA3/NDUFA3/NDUFA3/ATP5F1E/COX7B/NDUFAF4/NDUFA1/NDUFB1/COX7A2L/COX16/NDUFC1/ATP5MF/NDUFA3/ATP5ME/UQCR11/COX20	14	TRUE	3/86	121/5478	0.295584	0.949037	NDUFAF4/CYCS/ATP5ME	3	FALSE	10/153	121/5333	0.00232002	0.106411
More in resister	Reactome	R-HSA-163210	Formation of ATP by chemiosmotic coupling	4/293	18/5794	0.0111624	0.353339	MT-ATP8/ATP5F1E/ATP5MF/ATP5ME	4	FALSE	NA	NA	NA	NA	NA	NA	NA	NA	NA	NA	NA	NA	NA	NA	5/207	18/5681	0.000355662	0.0250591	MT-ATP8/ATP5F1E/DMAC2L/ATP5MF/ATP5ME	5	TRUE	4/236	18/5723	0.00546211	0.15869	MT-ATP8/ATP5F1E/ATP5MF/ATP5ME	4	FALSE	1/86	18/5478	0.248191	0.949037	ATP5ME	1	FALSE	2/153	18/5333	0.0927294	0.915474
More in resister	Reactome	R-HSA-168255	Influenza Infection	16/293	149/5794	0.00331166	0.151667	RPS21/POLR2K/RPL39/RPL22/PABPN1/RPS28/POLR2L/RPS29/RPL37/RPL36/RPS27L/RPL38/RPS27/RAN/RPL24/RPL37A	16	FALSE	3/87	150/6080	0.363595	0.817734	RPS29/RPL38/RPS27	3	FALSE	NA	NA	NA	NA	NA	NA	NA	18/207	148/5681	5.73343e-06	0.000916688	RPS17/RPS21/POLR2K/RPS15A/RPL39/RPL22/PABPN1/RPS28/POLR2L/RPS29/RPL37/RPL36/RPS17/RPL38/RPS27/RPL6/RPL35A/RPL24/RPL37A	18	TRUE	18/236	149/5723	3.47582e-05	0.00481184	RPS21/RPL39/RPL22/RPS28/RPLP2/POLR2L/TGFB1/RPL34/RPS29/RPL37/RPL36/RPL38/RPS27/RPL41/RAN/RPL35A/RPL24/RPL37A	18	TRUE	7/86	147/5478	0.00795216	0.319046	RPL39/POLR2L/RPS29/RPL38/RPS27/RPL24/RPL37A	7	FALSE	23/153	147/5333	1.41125e-11	2.57292e-09
More in resister	Reactome	R-HSA-168273	Influenza Viral RNA Transcription and Replication	14/293	129/5794	0.00532715	0.216353	RPS21/POLR2K/RPL39/RPL22/RPS28/POLR2L/RPS29/RPL37/RPL36/RPS27L/RPL38/RPS27/RPL24/RPL37A	14	FALSE	3/87	130/6080	0.284805	0.809563	RPS29/RPL38/RPS27	3	FALSE	NA	NA	NA	NA	NA	NA	NA	17/207	128/5681	3.13273e-06	0.00052091	RPS17/RPS21/POLR2K/RPS15A/RPL39/RPL22/RPS28/POLR2L/RPS29/RPL37/RPL36/RPS17/RPL38/RPS27/RPL6/RPL35A/RPL24/RPL37A	17	TRUE	16/236	129/5723	6.93163e-05	0.00818517	RPS21/RPL39/RPL22/RPS28/RPLP2/POLR2L/RPL34/RPS29/RPL37/RPL36/RPL38/RPS27/RPL41/RPL35A/RPL24/RPL37A	16	TRUE	7/86	127/5478	0.00358958	0.204157	RPL39/POLR2L/RPS29/RPL38/RPS27/RPL24/RPL37A	7	FALSE	23/153	127/5333	5.83023e-13	1.34639e-10
More in resister	Reactome	R-HSA-1799339	SRP-dependent cotranslational protein targeting to membrane	19/293	106/5794	1.07975e-06	0.000516482	RPS21/RPL39/RPL22/SEC61G/SRP14/SPCS3/SRP19/RPS28/SEC61B/RPS29/RPL37/RPL36/RPS27L/RPL38/RPS27/SEC11A/SRP9/RPL24/RPL37A	19	TRUE	4/87	107/6080	0.0665391	0.802948	SEC61G/RPS29/RPL38/RPS27	4	FALSE	1/38	106/5908	0.498505	0.678975	SEC61G	1	FALSE	20/207	106/5681	8.39706e-10	3.49066e-06	RPS17/RPS21/RPS15A/RPL39/RPL22/SEC61G/SRP14/RPS28/SEC61B/RPS29/SSR2/RPL37/RPL36/RPS17/RPL38/RPS27/RPL6/SRP9/RPL35A/RPL24/RPL37A	20	TRUE	21/236	106/5723	1.20803e-09	5.35158e-06	RPS21/RPL39/RPL22/SEC61G/SPCS3/SRP19/RPS28/RPLP2/RPL34/SEC61B/RPS29/SSR2/RPL37/RPL36/RPL38/RPS27/RPL41/SRP9/RPL35A/RPL24/RPL37A	21	TRUE	6/86	106/5478	0.00612269	0.274568	RPL39/RPS29/RPL38/RPS27/RPL24/RPL37A	6	FALSE	25/153	106/5333	6.94591e-17	2.40606e-13
More in resister	Reactome	R-HSA-192823	Viral mRNA Translation	12/293	84/5794	0.000953031	0.0715204	RPS21/RPL39/RPL22/RPS28/RPS29/RPL37/RPL36/RPS27L/RPL38/RPS27/RPL24/RPL37A	12	FALSE	3/87	84/6080	0.11845	0.809563	RPS29/RPL38/RPS27	3	FALSE	NA	NA	NA	NA	NA	NA	NA	15/207	84/5681	2.55806e-07	0.000123756	RPS17/RPS21/RPS15A/RPL39/RPL22/RPS28/RPS29/RPL37/RPL36/RPS17/RPL38/RPS27/RPL6/RPL35A/RPL24/RPL37A	15	TRUE	15/236	84/5723	1.26652e-06	0.00056287	RPS21/RPL39/RPL22/RPS28/RPLP2/RPL34/RPS29/RPL37/RPL36/RPL38/RPS27/RPL41/RPL35A/RPL24/RPL37A	15	TRUE	6/86	84/5478	0.00191858	0.174327	RPL39/RPS29/RPL38/RPS27/RPL24/RPL37A	6	FALSE	21/153	84/5333	7.2435e-15	7.72137e-12
More in resister	Reactome	R-HSA-2262752	Cellular responses to stress	NA	NA	NA	NA	NA	NA	NA	NA	NA	NA	NA	NA	NA	NA	NA	NA	NA	NA	NA	NA	NA	NA	NA	NA	NA	NA	NA	NA	NA	NA	NA	NA	NA	NA	NA	NA	NA	NA	NA	NA	NA	NA	NA	NA	NA	NA
More in resister	Reactome	R-HSA-2408522	Selenoamino acid metabolism	14/293	96/5794	0.000293413	0.0421047	EEF1E1/RPS21/RPL39/RPL22/RPS28/AIMP1/RPS29/RPL37/RPL36/RPS27L/RPL38/RPS27/RPL24/RPL37A	14	TRUE	4/87	96/6080	0.0481114	0.744215	AIMP1/RPS29/RPL38/RPS27	4	FALSE	NA	NA	NA	NA	NA	NA	NA	15/207	96/5681	1.533e-06	0.000303461	RPS17/RPS21/RPS15A/RPL39/RPL22/RPS28/RPS29/RPL37/RPL36/RPS17/RPL38/RPS27/RPL6/RPL35A/RPL24/RPL37A	15	TRUE	16/236	96/5723	1.45882e-06	0.00056287	EEF1E1/RPS21/RPL39/RPL22/RPS28/RPLP2/RPL34/RPS29/RPL37/RPL36/RPL38/RPS27/RPL41/RPL35A/RPL24/RPL37A	16	TRUE	7/86	96/5478	0.000707986	0.134222	EEF1E1/RPL39/RPS29/RPL38/RPS27/RPL24/RPL37A	7	FALSE	21/153	96/5333	1.29526e-13	3.73899e-11
More in resister	Reactome	R-HSA-2408557	Selenocysteine synthesis	12/293	86/5794	0.00117812	0.0715204	RPS21/RPL39/RPL22/RPS28/RPS29/RPL37/RPL36/RPS27L/RPL38/RPS27/RPL24/RPL37A	12	FALSE	3/87	86/6080	0.124735	0.809563	RPS29/RPL38/RPS27	3	FALSE	NA	NA	NA	NA	NA	NA	NA	15/207	86/5681	3.52691e-07	0.000133285	RPS17/RPS21/RPS15A/RPL39/RPL22/RPS28/RPS29/RPL37/RPL36/RPS17/RPL38/RPS27/RPL6/RPL35A/RPL24/RPL37A	15	TRUE	15/236	86/5723	1.73014e-06	0.00056287	RPS21/RPL39/RPL22/RPS28/RPLP2/RPL34/RPS29/RPL37/RPL36/RPL38/RPS27/RPL41/RPL35A/RPL24/RPL37A	15	TRUE	6/86	86/5478	0.00216444	0.174327	RPL39/RPS29/RPL38/RPS27/RPL24/RPL37A	6	FALSE	21/153	86/5333	1.2127e-14	7.72137e-12
More in resister	Reactome	R-HSA-373076	Class A/1 (Rhodopsin-like receptors)	5/293	53/5794	0.128102	0.999986	CCL3/CCL3/EDN1/PTGER2/CXCL2/CXCL3/CCL3	5	FALSE	NA	NA	NA	NA	NA	NA	NA	1/38	56/5908	0.304449	0.60657	PTGER2	1	FALSE	9/207	53/5681	0.000104532	0.00965645	CCL3L1/CCL3L1/CCL3L1/CCL3L1/CCL3/CCL3/CCL3L1/CCL3L1/EDN1/ANXA1/CXCL2/CXCL3/CXCL8/CCRL2/CCL3L3/CCL3L3/CCL3	9	TRUE	9/236	54/5723	0.000310084	0.022469	CCL3L1/CCL3L1/CCL3L1/CCL3L1/CCL3/CCL3/CCL3L1/CCL3L1/EDN1/CXCL2/CXCL3/CXCL8/C3/CCL3L3/CCL3L3/CCL3/GPR35	9	TRUE	NA	NA	NA	NA	NA	NA	NA	2/153	44/5333	0.361477	0.962874
More in resister	Reactome	R-HSA-375276	Peptide ligand-binding receptors	4/293	32/5794	0.0757224	0.999986	CCL3/CCL3/EDN1/CXCL2/CXCL3/CCL3	4	FALSE	NA	NA	NA	NA	NA	NA	NA	NA	NA	NA	NA	NA	NA	NA	9/207	33/5681	1.71507e-06	0.000309979	CCL3L1/CCL3L1/CCL3L1/CCL3L1/CCL3/CCL3/CCL3L1/CCL3L1/EDN1/ANXA1/CXCL2/CXCL3/CXCL8/CCRL2/CCL3L3/CCL3L3/CCL3	9	TRUE	8/236	35/5723	6.64575e-05	0.00818517	CCL3L1/CCL3L1/CCL3L1/CCL3L1/CCL3/CCL3/CCL3L1/CCL3L1/EDN1/CXCL2/CXCL3/CXCL8/C3/CCL3L3/CCL3L3/CCL3	8	TRUE	NA	NA	NA	NA	NA	NA	NA	2/153	30/5333	0.212216	0.962874
More in resister	Reactome	R-HSA-376176	Signaling by ROBO receptors	17/293	180/5794	0.00916581	0.318216	RPS21/MAGOHB/RPL39/RPL22/MAGOH/RPS28/ELOC/RPS29/RPL37/RPL36/RPS27L/RPL38/RPS27/SEM1/RPL24/RPL37A/CDC42	17	FALSE	4/87	181/6080	0.259739	0.809563	ELOC/RPS29/RPL38/RPS27	4	FALSE	NA	NA	NA	NA	NA	NA	NA	18/207	179/5681	7.82117e-05	0.00738923	RPS17/RPS21/RPS15A/RPL39/RPL22/RPS28/ELOC/RPS29/RPL37/RPL36/RPS17/RPL38/RPS27/SEM1/RPL6/NCBP2/RPL35A/RPL24/RPL37A	18	TRUE	19/236	179/5723	0.000126232	0.0115812	RPS21/MAGOHB/RPL39/RPL22/RPS28/RPLP2/ELOC/RPL34/RPS29/RPL37/RPL36/RPL38/RPS27/RPL41/SEM1/NCBP2/RPL35A/RPL24/RPL37A	19	TRUE	8/86	177/5478	0.00627584	0.274568	MAGOHB/RPL39/MAGOH/RPS29/RPL38/RPS27/RPL24/RPL37A	8	FALSE	23/153	176/5333	6.01936e-10	8.01964e-08
More in resister	Reactome	R-HSA-380108	Chemokine receptors bind chemokines	3/293	15/5794	0.0370496	0.705745	CCL3/CCL3/CXCL2/CXCL3/CCL3	3	FALSE	NA	NA	NA	NA	NA	NA	NA	NA	NA	NA	NA	NA	NA	NA	7/207	17/5681	1.09885e-06	0.000268351	CCL3L1/CCL3L1/CCL3L1/CCL3L1/CCL3/CCL3/CCL3L1/CCL3L1/CXCL2/CXCL3/CXCL8/CCRL2/CCL3L3/CCL3L3/CCL3	7	TRUE	6/236	20/5723	0.000109884	0.0110385	CCL3L1/CCL3L1/CCL3L1/CCL3L1/CCL3/CCL3/CCL3L1/CCL3L1/CXCL2/CXCL3/CXCL8/CCL3L3/CCL3L3/CCL3	6	TRUE	NA	NA	NA	NA	NA	NA	NA	2/153	15/5333	0.0672565	0.832058
More in resister	Reactome	R-HSA-422475	Axon guidance	24/293	333/5794	0.0483395	0.852876	RPS21/MYL12B/PRNP/MAGOHB/SDC2/DPYSL3/RPL39/RPL22/MAGOH/RPS28/ELOC/RPS29/RPL37/RPL36/RPS27L/RPL38/ARPC4/RPS27/SEM1/NRAS/RPL24/RPL37A/RHOC/CDC42	24	FALSE	6/87	336/6080	0.349032	0.811601	ELOC/PTK2/RPS29/RPL38/RPS27/RHOC	6	FALSE	1/38	332/5908	0.889735	0.911168	RHOC	1	FALSE	19/207	330/5681	0.0309038	0.383484	RPS17/RPS21/RPS15A/RPL39/RPL22/RPS28/ELOC/RPS29/RPL37/RPL36/RPS17/RPL38/RPS27/SEM1/RPL6/NCBP2/RPL35A/RPL24/RPL37A/RHOC	19	FALSE	25/236	331/5723	0.00222469	0.0887871	MYO10/RPS21/MMP9/MYL12B/TIAM1/MAGOHB/RPL39/RPL22/RPS28/ITGB1/RPLP2/ELOC/RPL34/RPS29/RPL37/RPL36/RPL38/RPS27/RPL41/SEM1/NCBP2/RPL35A/RPL24/RPL37A/RHOC	25	FALSE	10/86	314/5478	0.0243392	0.600652	MYL12B/MAGOHB/RPL39/MAGOH/RPS29/RPL38/RPS27/RPL24/RPL37A/RHOC	10	FALSE	28/153	311/5333	3.82138e-08	3.78208e-06
More in resister	Reactome	R-HSA-449147	Signaling by Interleukins	17/293	312/5794	0.41059	0.999986	CCL3/CCL3/RHOU/ELK1/MAP2K3/BOLA2B/BOLA2B/UBE2N/CSF1/RHOU/CLCF1/CXCL2/IL1R1/SKP1/BOLA2/PPP2R1A/SEM1/CCL3/IL1RN/CDC42/IL6R	17	FALSE	3/87	314/6080	0.835027	0.930142	ELK1/IL1R1/IL1RN	3	FALSE	1/38	317/5908	0.877843	0.901336	ELK1	1	FALSE	23/207	309/5681	0.000774896	0.0453696	CCL3L1/CCL3L1/CCL3L1/CCL3L1/CCL3/CCL3/CCL3L1/CCL3L1/RHOU/YWHAZ/IL7R/ANXA1/MYC/MAP2K3/UBE2N/CSF1/RHOU/CLCF1/CXCL2/VEGFA/IL1R1/CXCL8/SKP1/MAPKAPK2/SEM1/IL6/CCL3L3/CCL3L3/CCL3/IL1RN/IL36B/IL6R	23	TRUE	22/236	312/5723	0.00906564	0.196232	CCL3L1/CCL3L1/CCL3L1/CCL3L1/CCL3/CCL3/CCL3L1/CCL3L1/MMP9/YWHAZ/MAP2K3/SERPINB2/TNFRSF1B/BOLA2B/BOLA2B/UBE2N/ITGB1/CSF1/TGFB1/CXCL2/IL1R1/CDKN1A/CXCL8/SKP1/BOLA2/SEM1/CCL3L3/CCL3L3/CCL3/IL1RN/IL6R	22	FALSE	5/86	289/5478	0.478404	0.949037	RHOU/CSF1/RHOU/CLCF1/SKP1/IL1RN	5	FALSE	18/153	293/5333	0.00166107	0.0810415
More in resister	Reactome	R-HSA-500792	GPCR ligand binding	5/293	70/5794	0.279154	0.999986	CCL3/CCL3/EDN1/PTGER2/CXCL2/CXCL3/CCL3	5	FALSE	NA	NA	NA	NA	NA	NA	NA	1/38	71/5908	0.369277	0.634377	PTGER2	1	FALSE	10/207	68/5681	0.000151876	0.0131531	CCL3L1/CCL3L1/CCL3L1/CCL3L1/CCL3/CCL3/CCL3L1/CCL3L1/EDN1/ANXA1/CXCL2/CXCL3/CXCL8/CCRL2/CCL3L3/CCL3L3/CCL3/GNG12	10	TRUE	9/236	68/5723	0.00173908	0.0772231	CCL3L1/CCL3L1/CCL3L1/CCL3L1/CCL3/CCL3/CCL3L1/CCL3L1/EDN1/CXCL2/CXCL3/CXCL8/C3/CCL3L3/CCL3L3/CCL3/GPR35	9	FALSE	NA	NA	NA	NA	NA	NA	NA	2/153	58/5333	0.499643	0.964113
More in resister	Reactome	R-HSA-5368286	Mitochondrial translation initiation	13/293	86/5794	0.000336045	0.0466669	MRPL36/MTIF3/MRPL50/MRPL41/MRPL19/MRPL12/MRPL47/MRPS33/MRPL30/MRPL51/MRPL42/MRPL20/MRPL33	13	TRUE	2/87	86/6080	0.34955	0.811601	MRPL50/MRPL33	2	FALSE	2/38	86/5908	0.105196	0.530843	MRPL50/MRPL19	2	FALSE	4/207	86/5681	0.383372	0.778251	MRPL39/MRPL36/MRPL19/MRPL33	4	FALSE	9/236	86/5723	0.0085441	0.194725	MRPL50/MRPL41/MRPL52/MRPL12/MRPL47/MRPS33/MRPS18C/MRPL51/MRPL33	9	FALSE	6/86	86/5478	0.00216444	0.174327	MRPS30/MRPL50/MRPL47/MRPS18C/MRPL51/MRPL33	6	FALSE	4/153	86/5333	0.23279	0.962874
More in resister	Reactome	R-HSA-5628897	TP53 Regulates Metabolic Genes	10/293	80/5794	0.00665232	0.246881	YWHAE/YWHAH/COX7B/TXN/COX19/COX16/CYCS/LAMTOR3/RHEB/YWHAE/COX20	10	FALSE	3/87	80/6080	0.106256	0.809563	YWHAE/TXN/YWHAE/COX20	3	FALSE	2/38	80/5908	0.0931237	0.530843	TXN/COX20	2	FALSE	10/207	81/5681	0.000649363	0.0415293	YWHAE/YWHAH/COX7C/YWHAZ/COX7B/TXN/COX16/CYCS/COX6C/RHEB/YWHAE	10	TRUE	9/236	80/5723	0.00533299	0.15869	YWHAE/YWHAZ/COX7B/TXN/COX7A2L/COX16/RHEB/PRKAG2/YWHAE/COX20	9	FALSE	2/86	79/5478	0.353129	0.949037	TXN/CYCS	2	FALSE	7/153	78/5333	0.00669571	0.227392
More in resister	Reactome	R-HSA-5660526	Response to metal ions	NA	NA	NA	NA	NA	NA	NA	2/87	10/6080	0.00845418	0.507482	MT1H/MT1G	2	FALSE	NA	NA	NA	NA	NA	NA	NA	3/207	10/5681	0.00473284	0.129483	MT1E/MT1A/MT1G	3	FALSE	NA	NA	NA	NA	NA	NA	NA	NA	NA	NA	NA	NA	NA	NA	7/153	10/5333	1.55896e-09	1.80008e-07
More in resister	Reactome	R-HSA-5663205	Infectious disease	NA	NA	NA	NA	NA	NA	NA	NA	NA	NA	NA	NA	NA	NA	NA	NA	NA	NA	NA	NA	NA	NA	NA	NA	NA	NA	NA	NA	NA	NA	NA	NA	NA	NA	NA	NA	NA	NA	NA	NA	NA	NA	NA	NA	NA	NA
More in resister	Reactome	R-HSA-611105	Respiratory electron transport	11/293	102/5794	0.0134443	0.399155	MT-ND2/NDUFA3/NDUFA3/NDUFA3/NDUFA3/NDUFA3/NDUFA3/NDUFA3/NDUFA3/NDUFA3/COX7B/UQCRB/NDUFAF4/COX19/NDUFB1/COX16/CYCS/NDUFAF2/NDUFA3/COX20	11	FALSE	3/87	102/6080	0.178917	0.809563	NDUFAF4/NDUFB1/COX20	3	FALSE	1/38	102/5908	0.485154	0.671785	COX20	1	FALSE	10/207	101/5681	0.00352868	0.112389	NDUFA3/NDUFA3/NDUFA3/NDUFA3/NDUFA3/NDUFA3/NDUFA3/NDUFA3/NDUFA3/COX7C/COX7B/UQCRB/NDUFA1/UQCRH/NDUFB1/COX16/CYCS/COX6C/NDUFA3	10	FALSE	10/236	102/5723	0.00895352	0.196232	NDUFA3/NDUFA3/NDUFA3/NDUFA3/NDUFA3/NDUFA3/NDUFA3/NDUFA3/NDUFA3/COX7B/NDUFAF4/NDUFA1/NDUFB1/COX7A2L/COX16/NDUFC1/NDUFA3/UQCR11/COX20	10	FALSE	2/86	102/5478	0.478822	0.949037	NDUFAF4/CYCS	2	FALSE	8/153	102/5333	0.00857075	0.269901
More in resister	Reactome	R-HSA-6783783	Interleukin-10 signaling	5/293	32/5794	0.0209239	0.523705	CCL3/CCL3/CSF1/CXCL2/IL1R1/CCL3/IL1RN	5	FALSE	2/87	30/6080	0.0680036	0.806481	IL1R1/IL1RN	2	FALSE	NA	NA	NA	NA	NA	NA	NA	9/207	33/5681	1.71507e-06	0.000309979	CCL3L1/CCL3L1/CCL3L1/CCL3L1/CCL3/CCL3/CCL3L1/CCL3L1/CSF1/CXCL2/IL1R1/CXCL8/IL6/CCL3L3/CCL3L3/CCL3/IL1RN	9	TRUE	9/236	34/5723	6.29291e-06	0.00126716	CCL3L1/CCL3L1/CCL3L1/CCL3L1/CCL3/CCL3/CCL3L1/CCL3L1/TNFRSF1B/CSF1/CXCL2/IL1R1/CXCL8/CCL3L3/CCL3L3/CCL3/IL1RN	9	TRUE	2/86	29/5478	0.075268	0.949037	CSF1/IL1RN	2	FALSE	4/153	30/5333	0.00998416	0.30074
More in resister	Reactome	R-HSA-6791226	Major pathway of rRNA processing in the nucleolus and cytosol	19/293	172/5794	0.00100567	0.0715204	UTP4/RPS21/UTP4/RPL39/RPL22/PNO1/EXOSC6/RPS28/NIP7/DCAF13/DDX21/RPS29/RPL37/RPL36/RPS27L/RPL38/RPS27/C1D/RPL24/RPL37A	19	FALSE	7/87	173/6080	0.0115531	0.507482	PNO1/NIP7/DCAF13/DDX21/RPS29/RPL38/RPS27	7	FALSE	2/38	173/5908	0.306321	0.60657	PNO1/DCAF13	2	FALSE	17/207	169/5681	0.000123775	0.0111855	RPS17/RPS21/RPS15A/RPL39/RPL22/RPS28/DCAF13/RPS29/RPL37/RPL36/RPS17/RPL38/RPS27/C1D/RPL6/RPL35A/RPL24/RPL37A	17	TRUE	22/236	172/5723	1.73643e-06	0.00056287	RPS21/RPL39/RPL22/PNO1/UTP11/RPS28/RPLP2/BYSL/DCAF13/DDX21/RPL34/RPS29/RPL37/RPL36/RPL38/RPS27/C1D/RPL41/NOP58/RPL35A/RPL24/RPL37A	22	TRUE	11/86	169/5478	5.71901e-05	0.0260215	RPL39/NIP7/DCAF13/RPS29/RPL38/RPS27/C1D/EMG1/GNL3/RPL24/RPL37A	11	TRUE	23/153	168/5333	2.32492e-10	3.22141e-08
More in resister	Reactome	R-HSA-6806667	Metabolism of fat-soluble vitamins	3/293	20/5794	0.077207	0.999986	SDC2/SDC3/APOC2	3	FALSE	NA	NA	NA	NA	NA	NA	NA	NA	NA	NA	NA	NA	NA	NA	2/207	20/5681	0.16382	0.653736	LPL/APOC2	2	FALSE	1/236	18/5723	0.53194	0.928499	LRP12	1	FALSE	NA	NA	NA	NA	NA	NA	NA	5/153	18/5333	0.000115299	0.00726173
More in resister	Reactome	R-HSA-71291	Metabolism of amino acids and derivatives	18/293	237/5794	0.0536648	0.895454	EEF1E1/RPS21/MPST/RPL39/SERINC2/RPL22/RPS28/AIMP1/RPS29/RPL37/RPL36/RPS27L/RPL38/RPS27/APIP/SEM1/RPL24/RPL37A	18	FALSE	6/87	240/6080	0.128241	0.809563	MPST/RIMKLB/AIMP1/RPS29/RPL38/RPS27	6	FALSE	1/38	240/5908	0.794223	0.849294	SERINC2	1	FALSE	20/207	233/5681	0.000281589	0.021283	RPS17/RPS21/MPST/RPS15A/RIMKLB/RPL39/RPL22/AMD1/RPS28/CKB/RPS29/RPL37/RPL36/RPS17/RPL38/RPS27/SEM1/RPL6/RPL35A/RPL24/RPL37A	20	TRUE	22/236	233/5723	0.00021067	0.0173375	EEF1E1/RPS21/BCAT1/RPL39/SERINC2/SMS/RPL22/RPS28/CKB/RPLP2/RPL34/RPS29/RPL37/RPL36/RPL38/RPS27/NQO1/RPL41/SEM1/RPL35A/RPL24/RPL37A	22	TRUE	9/86	228/5478	0.00903077	0.342417	EEF1E1/MPST/RPL39/SERINC2/RPS29/RPL38/RPS27/RPL24/RPL37A	9	FALSE	24/153	229/5333	2.2408e-08	2.28298e-06
More in resister	Reactome	R-HSA-72163	mRNA Splicing - Major Pathway	29/293	179/5794	1.55442e-08	2.55208e-05	HNRNPH1/SNRPB2/SRSF6/SRSF3/SNRPD1/POLR2K/LSM3/MAGOHB/MAGOH/LSM5/PRPF38A/PABPN1/LSM7/POLR2L/ALYREF/SNRPD2/SNRPE/NUDT21/HNRNPH1/SF3A2/SNRPG/TRA2B/PPIL3/SNRNP27/PCBP1/PCBP2/SYF2/LSM8/SNRPF/SF3B6	29	TRUE	4/87	180/6080	0.256577	0.809563	SNRPD1/PRPF38A/PPIL3/SNRPF	4	FALSE	NA	NA	NA	NA	NA	NA	NA	14/207	176/5681	0.00469058	0.129483	HNRNPH1/POLR2K/PRPF38A/PABPN1/POLR2L/DDX5/HNRNPH1/HNRNPA0/TRA2B/PPIL3/SNRNP27/PCBP2/NCBP2/SYF2/SNRPF	14	FALSE	17/236	179/5723	0.00104586	0.053874	HNRNPH1/SNRPB2/SNRPD1/MAGOHB/LSM7/POLR2L/ALYREF/SNRPE/HNRNPH1/SF3A2/SNRPG/U2AF2/TRA2B/PPIL3/NCBP2/SF3B4/SNRPF/SF3B6	17	FALSE	8/86	177/5478	0.00627584	0.274568	HNRNPH1/MAGOHB/SNRNP40/MAGOH/POLR2L/NUDT21/HNRNPH1/PPIL3/SF3B4	8	FALSE	9/153	177/5333	0.0670706	0.832058
More in resister	Reactome	R-HSA-72165	mRNA Splicing - Minor Pathway	9/293	50/5794	0.00076559	0.0658419	SRSF6/SNRPD1/POLR2K/POLR2L/SNRPD2/SNRPE/SNRPG/SNRPF/SF3B6	9	FALSE	2/87	50/6080	0.160031	0.809563	SNRPD1/SNRPF	2	FALSE	NA	NA	NA	NA	NA	NA	NA	4/207	50/5681	0.107767	0.544998	POLR2K/POLR2L/NCBP2/SNRPF	4	FALSE	8/236	50/5723	0.000887958	0.0473934	SNRPD1/POLR2L/SNRPE/SNRPG/NCBP2/SF3B4/SNRPF/SF3B6	8	TRUE	3/86	50/5478	0.043149	0.785311	SNRNP40/POLR2L/SF3B4	3	FALSE	4/153	50/5333	0.0541509	0.812029
More in resister	Reactome	R-HSA-72172	mRNA Splicing	29/293	187/5794	4.26118e-08	4.5861e-05	HNRNPH1/SNRPB2/SRSF6/SRSF3/SNRPD1/POLR2K/LSM3/MAGOHB/MAGOH/LSM5/PRPF38A/PABPN1/LSM7/POLR2L/ALYREF/SNRPD2/SNRPE/NUDT21/HNRNPH1/SF3A2/SNRPG/TRA2B/PPIL3/SNRNP27/PCBP1/PCBP2/SYF2/LSM8/SNRPF/SF3B6	29	TRUE	4/87	188/6080	0.282079	0.809563	SNRPD1/PRPF38A/PPIL3/SNRPF	4	FALSE	NA	NA	NA	NA	NA	NA	NA	14/207	184/5681	0.00692665	0.163603	HNRNPH1/POLR2K/PRPF38A/PABPN1/POLR2L/DDX5/HNRNPH1/HNRNPA0/TRA2B/PPIL3/SNRNP27/PCBP2/NCBP2/SYF2/SNRPF	14	FALSE	17/236	187/5723	0.00169492	0.0772231	HNRNPH1/SNRPB2/SNRPD1/MAGOHB/LSM7/POLR2L/ALYREF/SNRPE/HNRNPH1/SF3A2/SNRPG/U2AF2/TRA2B/PPIL3/NCBP2/SF3B4/SNRPF/SF3B6	17	FALSE	8/86	185/5478	0.00813393	0.319046	HNRNPH1/MAGOHB/SNRNP40/MAGOH/POLR2L/NUDT21/HNRNPH1/PPIL3/SF3B4	8	FALSE	9/153	185/5333	0.0833222	0.877388
More in resister	Reactome	R-HSA-72203	Processing of Capped Intron-Containing Pre-mRNA	31/293	235/5794	6.20447e-07	0.000381575	HNRNPH1/SNRPB2/SRSF6/SRSF3/SNRPD1/POLR2K/LSM3/MAGOHB/MAGOH/LSM5/PRPF38A/PABPN1/THOC7/LSM7/POLR2L/ALYREF/SNRPD2/EIF4E/SNRPE/NUDT21/HNRNPH1/SF3A2/SNRPG/TRA2B/PPIL3/SNRNP27/PCBP1/PCBP2/SYF2/LSM8/SNRPF/SF3B6	31	TRUE	4/87	237/6080	0.441995	0.829774	SNRPD1/PRPF38A/PPIL3/SNRPF	4	FALSE	NA	NA	NA	NA	NA	NA	NA	15/207	231/5681	0.0207663	0.316211	HNRNPH1/POLR2K/PRPF38A/PABPN1/POLR2L/DDX5/NXF1/HNRNPH1/HNRNPA0/TRA2B/PPIL3/SNRNP27/PCBP2/NCBP2/SYF2/SNRPF	15	FALSE	18/236	235/5723	0.00790085	0.194449	HNRNPH1/SNRPB2/SNRPD1/MAGOHB/LSM7/POLR2L/ALYREF/EIF4E/SNRPE/HNRNPH1/SF3A2/SNRPG/U2AF2/TRA2B/PPIL3/NCBP2/SF3B4/SNRPF/SF3B6	18	FALSE	8/86	231/5478	0.0277252	0.621826	HNRNPH1/MAGOHB/SNRNP40/MAGOH/POLR2L/NUDT21/HNRNPH1/PPIL3/SF3B4	8	FALSE	10/153	231/5333	0.125881	0.962874
More in resister	Reactome	R-HSA-72312	rRNA processing	20/293	191/5794	0.00145428	0.0782585	UTP4/RPS21/UTP4/RPL39/RPL22/PNO1/EXOSC6/RPS28/NIP7/DCAF13/DDX21/GAR1/RPS29/RPL37/RPL36/RPS27L/RPL38/RPS27/C1D/RPL24/RPL37A	20	FALSE	8/87	192/6080	0.00591621	0.507482	PNO1/NIP7/DCAF13/DDX21/GAR1/RPS29/RPL38/RPS27	8	FALSE	2/38	192/5908	0.351578	0.626348	PNO1/DCAF13	2	FALSE	17/207	188/5681	0.000446767	0.0304461	RPS17/RPS21/RPS15A/RPL39/RPL22/RPS28/DCAF13/RPS29/RPL37/RPL36/RPS17/RPL38/RPS27/C1D/RPL6/RPL35A/RPL24/RPL37A	17	TRUE	22/236	191/5723	9.96525e-06	0.00172675	RPS21/RPL39/RPL22/PNO1/UTP11/RPS28/RPLP2/BYSL/DCAF13/DDX21/RPL34/RPS29/RPL37/RPL36/RPL38/RPS27/C1D/RPL41/NOP58/RPL35A/RPL24/RPL37A	22	TRUE	12/86	188/5478	3.10417e-05	0.0199476	RPL39/NIP7/DIMT1/DCAF13/RPS29/RPL38/RPS27/C1D/EMG1/GNL3/RPL24/RPL37A	12	TRUE	23/153	187/5333	2.03872e-09	2.27811e-07
More in resister	Reactome	R-HSA-72613	Eukaryotic Translation Initiation	14/293	113/5794	0.00154893	0.0813188	RPS21/RPL39/RPL22/RPS28/EIF3J/EIF4E/RPS29/RPL37/RPL36/RPS27L/RPL38/RPS27/RPL24/RPL37A	14	FALSE	4/87	114/6080	0.0799301	0.809563	EIF3J/RPS29/RPL38/RPS27	4	FALSE	NA	NA	NA	NA	NA	NA	NA	17/207	113/5681	5.23429e-07	0.000155421	RPS17/RPS21/RPS15A/RPL39/RPL22/RPS28/EIF1AX/EIF3J/RPS29/RPL37/RPL36/RPS17/RPL38/RPS27/RPL6/RPL35A/RPL24/RPL37A	17	TRUE	17/236	113/5723	2.97344e-06	0.000753862	RPS21/RPL39/RPL22/RPS28/RPLP2/EIF3J/RPL34/EIF4E/RPS29/RPL37/RPL36/RPL38/RPS27/RPL41/RPL35A/RPL24/RPL37A	17	TRUE	7/86	113/5478	0.00185085	0.174327	EIF2B2/RPL39/RPS29/RPL38/RPS27/RPL24/RPL37A	7	FALSE	22/153	113/5333	4.1439e-13	1.02532e-10
More in resister	Reactome	R-HSA-72649	Translation initiation complex formation	7/293	55/5794	0.019862	0.508963	RPS21/RPS28/EIF3J/EIF4E/RPS29/RPS27L/RPS27	7	FALSE	3/87	56/6080	0.045566	0.744215	EIF3J/RPS29/RPS27	3	FALSE	NA	NA	NA	NA	NA	NA	NA	8/207	55/5681	0.000755444	0.0453696	RPS17/RPS21/RPS15A/RPS28/EIF1AX/EIF3J/RPS29/RPS17/RPS27	8	TRUE	6/236	55/5723	0.0247168	0.368672	RPS21/RPS28/EIF3J/EIF4E/RPS29/RPS27	6	FALSE	2/86	55/5478	0.213486	0.949037	RPS29/RPS27	2	FALSE	8/153	55/5333	0.000148083	0.00899927
More in resister	Reactome	R-HSA-72662	Activation of the mRNA upon binding of the cap-binding complex and eIFs, and subsequent binding to 43S	7/293	56/5794	0.0217521	0.541287	RPS21/RPS28/EIF3J/EIF4E/RPS29/RPS27L/RPS27	7	FALSE	3/87	57/6080	0.0476152	0.744215	EIF3J/RPS29/RPS27	3	FALSE	NA	NA	NA	NA	NA	NA	NA	8/207	56/5681	0.000854262	0.0479888	RPS17/RPS21/RPS15A/RPS28/EIF1AX/EIF3J/RPS29/RPS17/RPS27	8	TRUE	6/236	56/5723	0.0267627	0.374712	RPS21/RPS28/EIF3J/EIF4E/RPS29/RPS27	6	FALSE	2/86	56/5478	0.219278	0.949037	RPS29/RPS27	2	FALSE	8/153	56/5333	0.000168616	0.00989978
More in resister	Reactome	R-HSA-72689	Formation of a pool of free 40S subunits	13/293	95/5794	0.000894831	0.0700409	RPS21/RPL39/RPL22/RPS28/EIF3J/RPS29/RPL37/RPL36/RPS27L/RPL38/RPS27/RPL24/RPL37A	13	FALSE	4/87	96/6080	0.0481114	0.744215	EIF3J/RPS29/RPL38/RPS27	4	FALSE	NA	NA	NA	NA	NA	NA	NA	17/207	95/5681	3.79762e-08	7.89335e-05	RPS17/RPS21/RPS15A/RPL39/RPL22/RPS28/EIF1AX/EIF3J/RPS29/RPL37/RPL36/RPS17/RPL38/RPS27/RPL6/RPL35A/RPL24/RPL37A	17	TRUE	16/236	95/5723	1.26148e-06	0.00056287	RPS21/RPL39/RPL22/RPS28/RPLP2/EIF3J/RPL34/RPS29/RPL37/RPL36/RPL38/RPS27/RPL41/RPL35A/RPL24/RPL37A	16	TRUE	6/86	95/5478	0.00357664	0.204157	RPL39/RPS29/RPL38/RPS27/RPL24/RPL37A	6	FALSE	22/153	95/5333	8.95981e-15	7.72137e-12
More in resister	Reactome	R-HSA-72695	Formation of the ternary complex, and subsequently, the 43S complex	6/293	48/5794	0.0326292	0.675331	RPS21/RPS28/EIF3J/RPS29/RPS27L/RPS27	6	FALSE	3/87	49/6080	0.032505	0.676989	EIF3J/RPS29/RPS27	3	FALSE	NA	NA	NA	NA	NA	NA	NA	8/207	48/5681	0.000291406	0.0216317	RPS17/RPS21/RPS15A/RPS28/EIF1AX/EIF3J/RPS29/RPS17/RPS27	8	TRUE	5/236	48/5723	0.0463246	0.524117	RPS21/RPS28/EIF3J/RPS29/RPS27	5	FALSE	2/86	48/5478	0.173501	0.949037	RPS29/RPS27	2	FALSE	8/153	48/5333	5.44098e-05	0.00362453
More in resister	Reactome	R-HSA-72702	Ribosomal scanning and start codon recognition	7/293	55/5794	0.019862	0.508963	RPS21/RPS28/EIF3J/EIF4E/RPS29/RPS27L/RPS27	7	FALSE	3/87	56/6080	0.045566	0.744215	EIF3J/RPS29/RPS27	3	FALSE	NA	NA	NA	NA	NA	NA	NA	8/207	55/5681	0.000755444	0.0453696	RPS17/RPS21/RPS15A/RPS28/EIF1AX/EIF3J/RPS29/RPS17/RPS27	8	TRUE	6/236	55/5723	0.0247168	0.368672	RPS21/RPS28/EIF3J/EIF4E/RPS29/RPS27	6	FALSE	2/86	55/5478	0.213486	0.949037	RPS29/RPS27	2	FALSE	8/153	55/5333	0.000148083	0.00899927
More in resister	Reactome	R-HSA-72706	GTP hydrolysis and joining of the 60S ribosomal subunit	14/293	106/5794	0.00082128	0.0667096	RPS21/RPL39/RPL22/RPS28/EIF3J/EIF4E/RPS29/RPL37/RPL36/RPS27L/RPL38/RPS27/RPL24/RPL37A	14	FALSE	4/87	107/6080	0.0665391	0.802948	EIF3J/RPS29/RPL38/RPS27	4	FALSE	NA	NA	NA	NA	NA	NA	NA	17/207	106/5681	2.02576e-07	0.000123756	RPS17/RPS21/RPS15A/RPL39/RPL22/RPS28/EIF1AX/EIF3J/RPS29/RPL37/RPL36/RPS17/RPL38/RPS27/RPL6/RPL35A/RPL24/RPL37A	17	TRUE	17/236	106/5723	1.189e-06	0.00056287	RPS21/RPL39/RPL22/RPS28/RPLP2/EIF3J/RPL34/EIF4E/RPS29/RPL37/RPL36/RPL38/RPS27/RPL41/RPL35A/RPL24/RPL37A	17	TRUE	6/86	106/5478	0.00612269	0.274568	RPL39/RPS29/RPL38/RPS27/RPL24/RPL37A	6	FALSE	22/153	106/5333	1.02844e-13	3.23865e-11
More in resister	Reactome	R-HSA-72737	Cap-dependent Translation Initiation	14/293	113/5794	0.00154893	0.0813188	RPS21/RPL39/RPL22/RPS28/EIF3J/EIF4E/RPS29/RPL37/RPL36/RPS27L/RPL38/RPS27/RPL24/RPL37A	14	FALSE	4/87	114/6080	0.0799301	0.809563	EIF3J/RPS29/RPL38/RPS27	4	FALSE	NA	NA	NA	NA	NA	NA	NA	17/207	113/5681	5.23429e-07	0.000155421	RPS17/RPS21/RPS15A/RPL39/RPL22/RPS28/EIF1AX/EIF3J/RPS29/RPL37/RPL36/RPS17/RPL38/RPS27/RPL6/RPL35A/RPL24/RPL37A	17	TRUE	17/236	113/5723	2.97344e-06	0.000753862	RPS21/RPL39/RPL22/RPS28/RPLP2/EIF3J/RPL34/EIF4E/RPS29/RPL37/RPL36/RPL38/RPS27/RPL41/RPL35A/RPL24/RPL37A	17	TRUE	7/86	113/5478	0.00185085	0.174327	EIF2B2/RPL39/RPS29/RPL38/RPS27/RPL24/RPL37A	7	FALSE	22/153	113/5333	4.1439e-13	1.02532e-10
More in resister	Reactome	R-HSA-72764	Eukaryotic Translation Termination	12/293	88/5794	0.00144564	0.0782585	RPS21/RPL39/RPL22/RPS28/RPS29/RPL37/RPL36/RPS27L/RPL38/RPS27/RPL24/RPL37A	12	FALSE	3/87	88/6080	0.131141	0.809563	RPS29/RPL38/RPS27	3	FALSE	NA	NA	NA	NA	NA	NA	NA	15/207	86/5681	3.52691e-07	0.000133285	RPS17/RPS21/RPS15A/RPL39/RPL22/RPS28/RPS29/RPL37/RPL36/RPS17/RPL38/RPS27/RPL6/RPL35A/RPL24/RPL37A	15	TRUE	15/236	86/5723	1.73014e-06	0.00056287	RPS21/RPL39/RPL22/RPS28/RPLP2/RPL34/RPS29/RPL37/RPL36/RPL38/RPS27/RPL41/RPL35A/RPL24/RPL37A	15	TRUE	6/86	86/5478	0.00216444	0.174327	RPL39/RPS29/RPL38/RPS27/RPL24/RPL37A	6	FALSE	21/153	87/5333	1.56032e-14	7.72137e-12
More in resister	Reactome	R-HSA-72766	Translation	36/293	259/5794	1.77845e-08	2.55208e-05	EEF1E1/MRPL36/RPS21/MTIF3/RPL39/MRPL50/MRPL41/RPL22/SEC61G/SRP14/MRPL19/SPCS3/SRP19/RPS28/MRPL12/EIF3J/MRPL47/MRPS33/EIF4E/SEC61B/AIMP1/RPS29/RPL37/RPL36/RPS27L/MRPL30/MRPL51/RPL38/RPS27/SEC11A/MRPL42/MRPL20/SRP9/RPL24/RPL37A/MRPL33	36	TRUE	8/87	262/6080	0.0330593	0.676989	MRPL50/SEC61G/EIF3J/AIMP1/RPS29/RPL38/RPS27/MRPL33	8	FALSE	3/38	259/5908	0.231431	0.57516	MRPL50/SEC61G/MRPL19	3	FALSE	26/207	256/5681	1.51767e-06	0.000303461	RPS17/MRPL39/MRPL36/RPS21/RPS15A/RPL39/RPL22/SEC61G/SRP14/MRPL19/RPS28/EIF1AX/EIF3J/SEC61B/RPS29/SSR2/RPL37/RPL36/RPS17/RPL38/RPS27/RPL6/SRP9/RPL35A/RPL24/RPL37A/MRPL33	26	TRUE	33/236	257/5723	3.16697e-09	7.01483e-06	EEF1E1/RPS21/RPL39/MRPL50/MRPL41/RPL22/SEC61G/MRPL52/SPCS3/SRP19/RPS28/MRPL12/RPLP2/EIF3J/MRPL47/MRPS33/MRPS18C/RPL34/EIF4E/SEC61B/RPS29/SSR2/RPL37/RPL36/MRPL51/RPL38/RPS27/RPL41/SRP9/RPL35A/RPL24/RPL37A/MRPL33	33	TRUE	14/86	255/5478	3.50727e-05	0.0199476	EEF1E1/MRPS30/EIF2B2/RPL39/MRPL50/MRPL47/MRPS18C/RPS29/MRPL51/RPL38/RPS27/RPL24/RPL37A/MRPL33	14	TRUE	30/153	256/5333	1.70341e-11	2.80982e-09
More in resister	Reactome	R-HSA-73856	RNA Polymerase II Transcription Termination	11/293	62/5794	0.000230684	0.0342446	SRSF6/SRSF3/MAGOHB/MAGOH/PABPN1/THOC7/ALYREF/SNRPE/NUDT21/SNRPG/SNRPF	11	TRUE	1/87	63/6080	0.598556	0.865389	SNRPF	1	FALSE	NA	NA	NA	NA	NA	NA	NA	3/207	58/5681	0.354625	0.773562	PABPN1/NCBP2/SNRPF	3	FALSE	7/236	62/5723	0.0132049	0.25884	MAGOHB/ALYREF/SNRPE/SNRPG/U2AF2/NCBP2/SNRPF	7	FALSE	3/86	60/5478	0.0674673	0.947457	MAGOHB/MAGOH/NUDT21	3	FALSE	2/153	60/5333	0.517816	0.964467
More in resister	Reactome	R-HSA-8868773	rRNA processing in the nucleus and cytosol	20/293	182/5794	0.000795302	0.0658419	UTP4/RPS21/UTP4/RPL39/RPL22/PNO1/EXOSC6/RPS28/NIP7/DCAF13/DDX21/GAR1/RPS29/RPL37/RPL36/RPS27L/RPL38/RPS27/C1D/RPL24/RPL37A	20	FALSE	8/87	183/6080	0.00443834	0.507482	PNO1/NIP7/DCAF13/DDX21/GAR1/RPS29/RPL38/RPS27	8	FALSE	2/38	183/5908	0.330227	0.609214	PNO1/DCAF13	2	FALSE	17/207	179/5681	0.000249726	0.0192243	RPS17/RPS21/RPS15A/RPL39/RPL22/RPS28/DCAF13/RPS29/RPL37/RPL36/RPS17/RPL38/RPS27/C1D/RPL6/RPL35A/RPL24/RPL37A	17	TRUE	22/236	182/5723	4.50643e-06	0.000998174	RPS21/RPL39/RPL22/PNO1/UTP11/RPS28/RPLP2/BYSL/DCAF13/DDX21/RPL34/RPS29/RPL37/RPL36/RPL38/RPS27/C1D/RPL41/NOP58/RPL35A/RPL24/RPL37A	22	TRUE	12/86	179/5478	1.89724e-05	0.0199476	RPL39/NIP7/DIMT1/DCAF13/RPS29/RPL38/RPS27/C1D/EMG1/GNL3/RPL24/RPL37A	12	TRUE	23/153	178/5333	7.56906e-10	9.71083e-08
More in resister	Reactome	R-HSA-8953854	Metabolism of RNA	NA	NA	NA	NA	NA	NA	NA	NA	NA	NA	NA	NA	NA	NA	NA	NA	NA	NA	NA	NA	NA	NA	NA	NA	NA	NA	NA	NA	NA	NA	NA	NA	NA	NA	NA	NA	NA	NA	NA	NA	NA	NA	NA	NA	NA	NA
More in resister	Reactome	R-HSA-8953897	Cellular responses to stimuli	NA	NA	NA	NA	NA	NA	NA	NA	NA	NA	NA	NA	NA	NA	NA	NA	NA	NA	NA	NA	NA	NA	NA	NA	NA	NA	NA	NA	NA	NA	NA	NA	NA	NA	NA	NA	NA	NA	NA	NA	NA	NA	NA	NA	NA	NA
More in resister	Reactome	R-HSA-9010553	Regulation of expression of SLITs and ROBOs	16/293	151/5794	0.00378461	0.171502	RPS21/MAGOHB/RPL39/RPL22/MAGOH/RPS28/ELOC/RPS29/RPL37/RPL36/RPS27L/RPL38/RPS27/SEM1/RPL24/RPL37A	16	FALSE	4/87	151/6080	0.169686	0.809563	ELOC/RPS29/RPL38/RPS27	4	FALSE	NA	NA	NA	NA	NA	NA	NA	18/207	149/5681	6.31364e-06	0.000972067	RPS17/RPS21/RPS15A/RPL39/RPL22/RPS28/ELOC/RPS29/RPL37/RPL36/RPS17/RPL38/RPS27/SEM1/RPL6/NCBP2/RPL35A/RPL24/RPL37A	18	TRUE	19/236	150/5723	1.05242e-05	0.00172675	RPS21/MAGOHB/RPL39/RPL22/RPS28/RPLP2/ELOC/RPL34/RPS29/RPL37/RPL36/RPL38/RPS27/RPL41/SEM1/NCBP2/RPL35A/RPL24/RPL37A	19	TRUE	8/86	149/5478	0.00218948	0.174327	MAGOHB/RPL39/MAGOH/RPS29/RPL38/RPS27/RPL24/RPL37A	8	FALSE	23/153	149/5333	1.88277e-11	2.96451e-09
More in resister	Reactome	R-HSA-927802	Nonsense-Mediated Decay (NMD)	15/293	110/5794	0.000380101	0.0491119	RPS21/MAGOHB/RPL39/RPL22/MAGOH/RPS28/RPS29/RPL37/RPL36/RPS27L/RPL38/RPS27/PPP2R1A/RPL24/RPL37A	15	TRUE	3/87	110/6080	0.208102	0.809563	RPS29/RPL38/RPS27	3	FALSE	NA	NA	NA	NA	NA	NA	NA	17/207	108/5681	2.67934e-07	0.000123756	RPS17/RPS21/RPS15A/RPL39/RPL22/RPS28/RPS29/RPL37/RPL36/RPS17/RPL38/RPS27/RPL6/NCBP2/RPL35A/RPL24/PNRC2/RPL37A	17	TRUE	17/236	109/5723	1.77882e-06	0.00056287	RPS21/MAGOHB/RPL39/RPL22/RPS28/RPLP2/RPL34/RPS29/RPL37/RPL36/RPL38/RPS27/RPL41/NCBP2/RPL35A/RPL24/RPL37A	17	TRUE	8/86	109/5478	0.000277967	0.0574886	MAGOHB/RPL39/MAGOH/RPS29/RPL38/RPS27/RPL24/RPL37A	8	FALSE	21/153	109/5333	1.84031e-12	3.74991e-10
More in resister	Reactome	R-HSA-9633012	Response of EIF2AK4 (GCN2) to amino acid deficiency	12/293	94/5794	0.00256396	0.125937	RPS21/RPL39/RPL22/RPS28/RPS29/RPL37/RPL36/RPS27L/RPL38/RPS27/RPL24/RPL37A	12	FALSE	3/87	94/6080	0.151026	0.809563	RPS29/RPL38/RPS27	3	FALSE	NA	NA	NA	NA	NA	NA	NA	15/207	94/5681	1.16197e-06	0.000268351	RPS17/RPS21/RPS15A/RPL39/RPL22/RPS28/RPS29/RPL37/RPL36/RPS17/RPL38/RPS27/RPL6/RPL35A/RPL24/RPL37A	15	TRUE	15/236	94/5723	5.49335e-06	0.00115884	RPS21/RPL39/RPL22/RPS28/RPLP2/RPL34/RPS29/RPL37/RPL36/RPL38/RPS27/RPL41/RPL35A/RPL24/RPL37A	15	TRUE	6/86	94/5478	0.00339273	0.204157	RPL39/RPS29/RPL38/RPS27/RPL24/RPL37A	6	FALSE	21/153	94/5333	8.27375e-14	2.8921e-11
More in resister	Reactome	R-HSA-9675108	Nervous system development	24/293	344/5794	0.0655188	0.999986	RPS21/MYL12B/PRNP/MAGOHB/SDC2/DPYSL3/RPL39/RPL22/MAGOH/RPS28/ELOC/RPS29/RPL37/RPL36/RPS27L/RPL38/ARPC4/RPS27/SEM1/NRAS/RPL24/RPL37A/RHOC/CDC42	24	FALSE	6/87	349/6080	0.382803	0.819587	ELOC/PTK2/RPS29/RPL38/RPS27/RHOC	6	FALSE	1/38	344/5908	0.898431	0.915898	RHOC	1	FALSE	19/207	342/5681	0.0422003	0.423273	RPS17/RPS21/RPS15A/RPL39/RPL22/RPS28/ELOC/RPS29/RPL37/RPL36/RPS17/RPL38/RPS27/SEM1/RPL6/NCBP2/RPL35A/RPL24/RPL37A/RHOC	19	FALSE	26/236	343/5723	0.00172573	0.0772231	MYO10/RPS21/MMP9/MYL12B/TIAM1/MAGOHB/RPL39/RPL22/RPS28/ITGB1/RPLP2/ELOC/EGR2/RPL34/RPS29/RPL37/RPL36/RPL38/RPS27/RPL41/SEM1/NCBP2/RPL35A/RPL24/RPL37A/RHOC	26	FALSE	11/86	325/5478	0.0121232	0.411646	MYL12B/MAGOHB/RPL39/MAGOH/EGR2/RPS29/RPL38/RPS27/RPL24/RPL37A/RHOC	11	FALSE	28/153	322/5333	8.11466e-08	7.59708e-06
More in resister	Reactome	R-HSA-9678108	SARS-CoV-1 Infection	11/293	123/5794	0.0459374	0.836304	YWHAE/YWHAH/RPS21/RPS28/MGAT1/YWHAE/RPS29/RPS27L/RPS27/MAP1LC3B/PCBP2/SUMO1	11	FALSE	4/87	125/6080	0.103458	0.809563	YWHAE/CTSL/YWHAE/RPS29/RPS27	4	FALSE	1/38	124/5908	0.554525	0.709816	CTSL	1	FALSE	15/207	123/5681	3.43442e-05	0.00407911	RPS17/YWHAE/YWHAH/RPS21/CHMP4B/YWHAZ/RPS15A/CTSL/RPS28/MGAT1/DDX5/YWHAE/RPS29/RPS17/RPS27/MAP1LC3B/PCBP2	15	TRUE	11/236	124/5723	0.0128857	0.254839	YWHAE/RPS21/YWHAZ/CTSL/RPS28/MGAT1/UBE2I/YWHAE/CHMP6/RPS29/RPS27/MAP1LC3B	11	FALSE	3/86	123/5478	0.304225	0.949037	CTSL/RPS29/RPS27	3	FALSE	10/153	122/5333	0.00246609	0.110942
More in resister	Reactome	R-HSA-9692914	SARS-CoV-1-host interactions	8/293	84/5794	0.0608466	0.977405	YWHAE/YWHAH/RPS21/RPS28/YWHAE/RPS29/RPS27L/RPS27/PCBP2	8	FALSE	3/87	84/6080	0.11845	0.809563	YWHAE/YWHAE/RPS29/RPS27	3	FALSE	NA	NA	NA	NA	NA	NA	NA	10/207	83/5681	0.000789211	0.045566	RPS17/YWHAE/YWHAH/RPS21/YWHAZ/RPS15A/RPS28/YWHAE/RPS29/RPS17/RPS27/PCBP2	10	TRUE	7/236	84/5723	0.0571598	0.562325	YWHAE/RPS21/YWHAZ/RPS28/UBE2I/YWHAE/RPS29/RPS27	7	FALSE	2/86	83/5478	0.375877	0.949037	RPS29/RPS27	2	FALSE	9/153	83/5333	0.000557598	0.030659
More in resister	Reactome	R-HSA-9705683	SARS-CoV-2-host interactions	15/293	165/5794	0.019207	0.501128	YWHAE/YWHAH/RPS21/SNRPD1/UBE2N/RPS28/SAR1B/SNRPD2/YWHAE/SNRPE/RPS29/RPS27L/SNRPG/RPS27/MAP1LC3B/SNRPF	15	FALSE	5/87	168/6080	0.0920767	0.809563	YWHAE/SNRPD1/YWHAE/RPS29/RPS27/SNRPF	5	FALSE	NA	NA	NA	NA	NA	NA	NA	12/207	161/5681	0.0140431	0.253471	RPS17/YWHAE/YWHAH/RPS21/YWHAZ/RPS15A/UBE2N/RPS28/YWHAE/RPS29/RPS17/RPS27/MAP1LC3B/SNRPF	12	FALSE	12/236	165/5723	0.0391313	0.47624	YWHAE/RPS21/SNRPD1/YWHAZ/UBE2N/RPS28/YWHAE/SNRPE/RPS29/SNRPG/RPS27/MAP1LC3B/SNRPF	12	FALSE	2/86	158/5478	0.715567	0.968608	RPS29/RPS27	2	FALSE	11/153	159/5333	0.0056697	0.202473
More in resister	Reactome	R-HSA-9711097	Cellular response to starvation	15/293	140/5794	0.00449509	0.197463	RPS21/RPL39/RPL22/LAMTOR3/RPS28/ATP6V0C/RHEB/RPS29/RPL37/RPL36/RPS27L/RPL38/RPS27/RPL24/RPL37A	15	FALSE	3/87	142/6080	0.332062	0.809563	RPS29/RPL38/RPS27	3	FALSE	NA	NA	NA	NA	NA	NA	NA	17/207	138/5681	8.85744e-06	0.00131501	RPS17/RPS21/RPS15A/RPL39/RPL22/RPS28/ATP6V0C/RHEB/RPS29/RPL37/RPL36/RPS17/RPL38/RPS27/RPL6/RPL35A/RPL24/RPL37A	17	TRUE	17/236	137/5723	4.07562e-05	0.00547121	RPS21/RPL39/RPL22/RPS28/RPLP2/ATP6V0C/RHEB/RPL34/RPS29/RPL37/RPL36/RPL38/RPS27/RPL41/RPL35A/RPL24/RPL37A	17	TRUE	6/86	137/5478	0.0200941	0.55749	RPL39/RPS29/RPL38/RPS27/RPL24/RPL37A	6	FALSE	22/153	138/5333	2.79554e-11	4.21033e-09
More in resister	Reactome	R-HSA-9735869	SARS-CoV-1 modulates host translation machinery	5/293	34/5794	0.0266436	0.602416	RPS21/RPS28/RPS29/RPS27L/RPS27	5	FALSE	2/87	34/6080	0.0845786	0.809563	RPS29/RPS27	2	FALSE	NA	NA	NA	NA	NA	NA	NA	6/207	34/5681	0.00124517	0.0616213	RPS17/RPS21/RPS15A/RPS28/RPS29/RPS17/RPS27	6	FALSE	4/236	34/5723	0.0496098	0.538655	RPS21/RPS28/RPS29/RPS27	4	FALSE	2/86	34/5478	0.0989712	0.949037	RPS29/RPS27	2	FALSE	7/153	34/5333	3.91059e-05	0.00270926
More in resister	Reactome	R-HSA-9754678	SARS-CoV-2 modulates host translation machinery	10/293	45/5794	6.16883e-05	0.0120713	RPS21/SNRPD1/RPS28/SNRPD2/SNRPE/RPS29/RPS27L/SNRPG/RPS27/SNRPF	10	TRUE	4/87	47/6080	0.00436637	0.507482	SNRPD1/RPS29/RPS27/SNRPF	4	FALSE	NA	NA	NA	NA	NA	NA	NA	7/207	45/5681	0.00107528	0.0558744	RPS17/RPS21/RPS15A/RPS28/RPS29/RPS17/RPS27/SNRPF	7	FALSE	8/236	46/5723	0.000497557	0.0312705	RPS21/SNRPD1/RPS28/SNRPE/RPS29/SNRPG/RPS27/SNRPF	8	TRUE	2/86	45/5478	0.156782	0.949037	RPS29/RPS27	2	FALSE	9/153	45/5333	3.81192e-06	0.000293433
More in resister	Reactome	R-HSA-975634	Retinoid metabolism and transport	3/293	17/5794	0.0514199	0.871719	SDC2/SDC3/APOC2	3	FALSE	NA	NA	NA	NA	NA	NA	NA	NA	NA	NA	NA	NA	NA	NA	2/207	17/5681	0.125693	0.586906	LPL/APOC2	2	FALSE	1/236	15/5723	0.468718	0.924659	LRP12	1	FALSE	NA	NA	NA	NA	NA	NA	NA	5/153	15/5333	4.33344e-05	0.00294334
More in resister	Reactome	R-HSA-975956	Nonsense Mediated Decay (NMD) independent of the Exon Junction Complex (EJC)	12/293	90/5794	0.00176147	0.0902751	RPS21/RPL39/RPL22/RPS28/RPS29/RPL37/RPL36/RPS27L/RPL38/RPS27/RPL24/RPL37A	12	FALSE	3/87	90/6080	0.137661	0.809563	RPS29/RPL38/RPS27	3	FALSE	NA	NA	NA	NA	NA	NA	NA	16/207	89/5681	9.08815e-08	0.000123756	RPS17/RPS21/RPS15A/RPL39/RPL22/RPS28/RPS29/RPL37/RPL36/RPS17/RPL38/RPS27/RPL6/NCBP2/RPL35A/RPL24/RPL37A	16	TRUE	16/236	89/5723	5.03696e-07	0.00056287	RPS21/RPL39/RPL22/RPS28/RPLP2/RPL34/RPS29/RPL37/RPL36/RPL38/RPS27/RPL41/NCBP2/RPL35A/RPL24/RPL37A	16	TRUE	6/86	89/5478	0.00257702	0.177658	RPL39/RPS29/RPL38/RPS27/RPL24/RPL37A	6	FALSE	21/153	89/5333	2.55549e-14	1.10653e-11
More in resister	Reactome	R-HSA-975957	Nonsense Mediated Decay (NMD) enhanced by the Exon Junction Complex (EJC)	15/293	110/5794	0.000380101	0.0491119	RPS21/MAGOHB/RPL39/RPL22/MAGOH/RPS28/RPS29/RPL37/RPL36/RPS27L/RPL38/RPS27/PPP2R1A/RPL24/RPL37A	15	TRUE	3/87	110/6080	0.208102	0.809563	RPS29/RPL38/RPS27	3	FALSE	NA	NA	NA	NA	NA	NA	NA	17/207	108/5681	2.67934e-07	0.000123756	RPS17/RPS21/RPS15A/RPL39/RPL22/RPS28/RPS29/RPL37/RPL36/RPS17/RPL38/RPS27/RPL6/NCBP2/RPL35A/RPL24/PNRC2/RPL37A	17	TRUE	17/236	109/5723	1.77882e-06	0.00056287	RPS21/MAGOHB/RPL39/RPL22/RPS28/RPLP2/RPL34/RPS29/RPL37/RPL36/RPL38/RPS27/RPL41/NCBP2/RPL35A/RPL24/RPL37A	17	TRUE	8/86	109/5478	0.000277967	0.0574886	MAGOHB/RPL39/MAGOH/RPS29/RPL38/RPS27/RPL24/RPL37A	8	FALSE	21/153	109/5333	1.84031e-12	3.74991e-10
a) Direction of the differentially expressed genes (DEG) used for the GO-term/pathway enrichment analysis: "Combined" = all DEG in the cluster, "More in resister" = only DEG with positive log2FC. Note 1: Only GO-terms/pathways significant in at least one cluster are included in the table. Note 2: when testing only DEG with negative log2FC, no GO-term/pathway passed significance in any cluster.
b) Gene ratio: N term DEG/ Total N of DEG from the tested direction (see "a").
c) Background ratio: N background term genes / Total N of genes used in the DE analysis for the cluster.
d) Raw P-value.
e) adjusted P-value: False discovery rate (FDR) using Benjamini-Hochberg procedure. Threshold = FDR < 0.05.
f) Gene names of the term DEG.
g) N term DEG. Threshold = Count > 5.
h) T/F indicating if the GO-term/pathway passed the thresholds for enrichment in the cluster (FDR < 0.05 and Count > 5).
[truncated: 25 more columns]
