# Supplementary material for: Mycobacterium tuberculosis resisters despite HIV exhibit activated T cells and macrophages in their pulmonary alveoli
Source: Research Square preprint supplement (doi:10.21203/rs.3.rs-3889020/v1), 2024-01-31
Supplement: Supplementary file 3 [file 7c955b1d9d84d5e58c6bf14a.xlsx]

## Sheet: Table S7
Supplementary Table 7. Transcription expression change and proportion of cells expressing of selected genes at 6h and 24h of in-vitro culture in presence and absence of Mtb in LTBI and resister BAL cells.
Test ID a	p_val b	avg_log2FC c	pct.1 d	pct.2 e	pct diff f	Cluster	Contrast g	Gene	PASS h	Group 1	Group 2
AM.0.INF24h_RxL.CAMP	2.40531e-05	-0.0464969	0.231	0.259	-0.028	AM.0	INF24h_RxL	CAMP	FALSE	Resister_MtbINF.24h	LTBI_MtbINF.24h
AM.1.INF24h_RxL.CAMP	0.0386383	-0.030739	0.154	0.168	-0.014	AM.1	INF24h_RxL	CAMP	FALSE	Resister_MtbINF.24h	LTBI_MtbINF.24h
AM.10.INF24h_RxL.CAMP	0.519819	0.00772889	0.152	0.181	-0.029	AM.10	INF24h_RxL	CAMP	FALSE	Resister_MtbINF.24h	LTBI_MtbINF.24h
AM.11.INF24h_RxL.CAMP	0.304305	-0.146988	0.148	0.234	-0.086	AM.11	INF24h_RxL	CAMP	FALSE	Resister_MtbINF.24h	LTBI_MtbINF.24h
AM.2.INF24h_RxL.CAMP	0.829057	-0.0230621	0.197	0.187	0.01	AM.2	INF24h_RxL	CAMP	FALSE	Resister_MtbINF.24h	LTBI_MtbINF.24h
AM.3.INF24h_RxL.CAMP	0.859957	-0.00770378	0.186	0.19	-0.004	AM.3	INF24h_RxL	CAMP	FALSE	Resister_MtbINF.24h	LTBI_MtbINF.24h
AM.5.INF24h_RxL.CAMP	0.0314864	-0.0285569	0.173	0.202	-0.029	AM.5	INF24h_RxL	CAMP	FALSE	Resister_MtbINF.24h	LTBI_MtbINF.24h
AM.6.INF24h_RxL.CAMP	0.535636	-0.0177596	0.205	0.21	-0.005	AM.6	INF24h_RxL	CAMP	FALSE	Resister_MtbINF.24h	LTBI_MtbINF.24h
AM.7.INF24h_RxL.CAMP	0.0810327	0.00743649	0.188	0.164	0.024	AM.7	INF24h_RxL	CAMP	FALSE	Resister_MtbINF.24h	LTBI_MtbINF.24h
AM.8.INF24h_RxL.CAMP	0.850803	-0.00934594	0.183	0.177	0.006	AM.8	INF24h_RxL	CAMP	FALSE	Resister_MtbINF.24h	LTBI_MtbINF.24h
AM.0.INF6h_RxL.CAMP	0.917122	-0.0232102	0.4	0.389	0.011	AM.0	INF6h_RxL	CAMP	FALSE	Resister_MtbINF.6h	LTBI_MtbINF.6h
AM.1.INF6h_RxL.CAMP	0.0322929	-0.0297303	0.272	0.291	-0.019	AM.1	INF6h_RxL	CAMP	FALSE	Resister_MtbINF.6h	LTBI_MtbINF.6h
AM.10.INF6h_RxL.CAMP	0.0178133	-0.119334	0.264	0.342	-0.078	AM.10	INF6h_RxL	CAMP	TRUE	Resister_MtbINF.6h	LTBI_MtbINF.6h
AM.11.INF6h_RxL.CAMP	0.755088	-0.0196899	0.376	0.364	0.012	AM.11	INF6h_RxL	CAMP	FALSE	Resister_MtbINF.6h	LTBI_MtbINF.6h
AM.2.INF6h_RxL.CAMP	0.175677	-0.00721253	0.302	0.279	0.023	AM.2	INF6h_RxL	CAMP	FALSE	Resister_MtbINF.6h	LTBI_MtbINF.6h
AM.3.INF6h_RxL.CAMP	0.0261263	-0.0518323	0.331	0.341	-0.01	AM.3	INF6h_RxL	CAMP	FALSE	Resister_MtbINF.6h	LTBI_MtbINF.6h
AM.5.INF6h_RxL.CAMP	0.606199	-0.0356631	0.319	0.321	-0.002	AM.5	INF6h_RxL	CAMP	FALSE	Resister_MtbINF.6h	LTBI_MtbINF.6h
AM.6.INF6h_RxL.CAMP	0.482657	-0.0353596	0.382	0.393	-0.011	AM.6	INF6h_RxL	CAMP	FALSE	Resister_MtbINF.6h	LTBI_MtbINF.6h
AM.7.INF6h_RxL.CAMP	0.0465646	0.017972	0.361	0.317	0.044	AM.7	INF6h_RxL	CAMP	FALSE	Resister_MtbINF.6h	LTBI_MtbINF.6h
AM.8.INF6h_RxL.CAMP	0.0986873	-0.0824071	0.218	0.314	-0.096	AM.8	INF6h_RxL	CAMP	FALSE	Resister_MtbINF.6h	LTBI_MtbINF.6h
MoAM.4.INF6h_RxL.CAMP	0.0223298	-0.0334927	0.082	0.107	-0.025	MoAM.4	INF6h_RxL	CAMP	FALSE	Resister_MtbINF.6h	LTBI_MtbINF.6h
AM.0.L24h_IxN.CAMP	0.073978	-0.00201818	0.259	0.245	0.014	AM.0	L24h_IxN	CAMP	FALSE	LTBI_MtbINF.24h	LTBI_MtbNEG.24h
AM.1.L24h_IxN.CAMP	0.835372	-0.00100992	0.168	0.166	0.002	AM.1	L24h_IxN	CAMP	FALSE	LTBI_MtbINF.24h	LTBI_MtbNEG.24h
AM.10.L24h_IxN.CAMP	0.718246	-0.0146301	0.181	0.165	0.016	AM.10	L24h_IxN	CAMP	FALSE	LTBI_MtbINF.24h	LTBI_MtbNEG.24h
AM.11.L24h_IxN.CAMP	0.91744	-0.0231507	0.234	0.214	0.02	AM.11	L24h_IxN	CAMP	FALSE	LTBI_MtbINF.24h	LTBI_MtbNEG.24h
AM.2.L24h_IxN.CAMP	0.802035	-0.00767689	0.187	0.183	0.004	AM.2	L24h_IxN	CAMP	FALSE	LTBI_MtbINF.24h	LTBI_MtbNEG.24h
AM.3.L24h_IxN.CAMP	0.112597	-0.0341242	0.19	0.228	-0.038	AM.3	L24h_IxN	CAMP	FALSE	LTBI_MtbINF.24h	LTBI_MtbNEG.24h
AM.5.L24h_IxN.CAMP	0.00057728	-0.0421654	0.202	0.248	-0.046	AM.5	L24h_IxN	CAMP	FALSE	LTBI_MtbINF.24h	LTBI_MtbNEG.24h
AM.6.L24h_IxN.CAMP	0.0416316	0.0114148	0.21	0.181	0.029	AM.6	L24h_IxN	CAMP	FALSE	LTBI_MtbINF.24h	LTBI_MtbNEG.24h
AM.7.L24h_IxN.CAMP	0.0299649	-0.0386201	0.164	0.197	-0.033	AM.7	L24h_IxN	CAMP	FALSE	LTBI_MtbINF.24h	LTBI_MtbNEG.24h
AM.8.L24h_IxN.CAMP	0.330607	0.00425828	0.177	0.19	-0.013	AM.8	L24h_IxN	CAMP	FALSE	LTBI_MtbINF.24h	LTBI_MtbNEG.24h
AM.0.L6h_IxN.CAMP	0.90503	-0.00951342	0.389	0.378	0.011	AM.0	L6h_IxN	CAMP	FALSE	LTBI_MtbINF.6h	LTBI_MtbNEG.6h
AM.1.L6h_IxN.CAMP	0.105434	0.00190124	0.291	0.272	0.019	AM.1	L6h_IxN	CAMP	FALSE	LTBI_MtbINF.6h	LTBI_MtbNEG.6h
AM.10.L6h_IxN.CAMP	0.0963491	0.0800713	0.342	0.284	0.058	AM.10	L6h_IxN	CAMP	FALSE	LTBI_MtbINF.6h	LTBI_MtbNEG.6h
AM.11.L6h_IxN.CAMP	0.836308	0.0280428	0.364	0.346	0.018	AM.11	L6h_IxN	CAMP	FALSE	LTBI_MtbINF.6h	LTBI_MtbNEG.6h
AM.2.L6h_IxN.CAMP	0.436919	-0.00799389	0.279	0.264	0.015	AM.2	L6h_IxN	CAMP	FALSE	LTBI_MtbINF.6h	LTBI_MtbNEG.6h
AM.3.L6h_IxN.CAMP	0.201515	0.00504241	0.341	0.324	0.017	AM.3	L6h_IxN	CAMP	FALSE	LTBI_MtbINF.6h	LTBI_MtbNEG.6h
AM.5.L6h_IxN.CAMP	0.446345	-0.0166795	0.321	0.322	-0.001	AM.5	L6h_IxN	CAMP	FALSE	LTBI_MtbINF.6h	LTBI_MtbNEG.6h
AM.6.L6h_IxN.CAMP	0.668199	-0.0047798	0.393	0.395	-0.002	AM.6	L6h_IxN	CAMP	FALSE	LTBI_MtbINF.6h	LTBI_MtbNEG.6h
AM.7.L6h_IxN.CAMP	0.443904	-0.000348437	0.317	0.329	-0.012	AM.7	L6h_IxN	CAMP	FALSE	LTBI_MtbINF.6h	LTBI_MtbNEG.6h
AM.8.L6h_IxN.CAMP	0.624306	0.0089923	0.314	0.289	0.025	AM.8	L6h_IxN	CAMP	FALSE	LTBI_MtbINF.6h	LTBI_MtbNEG.6h
MoAM.4.L6h_IxN.CAMP	0.125757	0.0110508	0.107	0.093	0.014	MoAM.4	L6h_IxN	CAMP	FALSE	LTBI_MtbINF.6h	LTBI_MtbNEG.6h
AM.0.NEG24h_RxL.CAMP	0.78764	-0.0306802	0.259	0.245	0.014	AM.0	NEG24h_RxL	CAMP	FALSE	Resister_MtbNEG.24h	LTBI_MtbNEG.24h
AM.1.NEG24h_RxL.CAMP	0.6887	-0.0200108	0.176	0.166	0.01	AM.1	NEG24h_RxL	CAMP	FALSE	Resister_MtbNEG.24h	LTBI_MtbNEG.24h
AM.10.NEG24h_RxL.CAMP	0.0962904	-0.0360552	0.113	0.165	-0.052	AM.10	NEG24h_RxL	CAMP	FALSE	Resister_MtbNEG.24h	LTBI_MtbNEG.24h
AM.11.NEG24h_RxL.CAMP	0.664905	-0.106137	0.2	0.214	-0.014	AM.11	NEG24h_RxL	CAMP	FALSE	Resister_MtbNEG.24h	LTBI_MtbNEG.24h
AM.2.NEG24h_RxL.CAMP	0.041917	-0.00874557	0.209	0.183	0.026	AM.2	NEG24h_RxL	CAMP	FALSE	Resister_MtbNEG.24h	LTBI_MtbNEG.24h
AM.3.NEG24h_RxL.CAMP	0.630861	-0.0239136	0.22	0.228	-0.008	AM.3	NEG24h_RxL	CAMP	FALSE	Resister_MtbNEG.24h	LTBI_MtbNEG.24h
AM.5.NEG24h_RxL.CAMP	0.00126824	-0.0594863	0.188	0.248	-0.06	AM.5	NEG24h_RxL	CAMP	FALSE	Resister_MtbNEG.24h	LTBI_MtbNEG.24h
AM.6.NEG24h_RxL.CAMP	0.000818753	0.0182397	0.245	0.181	0.064	AM.6	NEG24h_RxL	CAMP	FALSE	Resister_MtbNEG.24h	LTBI_MtbNEG.24h
AM.7.NEG24h_RxL.CAMP	0.143172	0.0344875	0.237	0.197	0.04	AM.7	NEG24h_RxL	CAMP	FALSE	Resister_MtbNEG.24h	LTBI_MtbNEG.24h
AM.8.NEG24h_RxL.CAMP	0.287679	0.00680543	0.209	0.19	0.019	AM.8	NEG24h_RxL	CAMP	FALSE	Resister_MtbNEG.24h	LTBI_MtbNEG.24h
AM.0.NEG6h_RxL.CAMP	0.0346282	-0.0513408	0.381	0.378	0.003	AM.0	NEG6h_RxL	CAMP	FALSE	Resister_MtbNEG.6h	LTBI_MtbNEG.6h
AM.1.NEG6h_RxL.CAMP	0.00195773	-0.0610872	0.252	0.272	-0.02	AM.1	NEG6h_RxL	CAMP	FALSE	Resister_MtbNEG.6h	LTBI_MtbNEG.6h
AM.10.NEG6h_RxL.CAMP	0.468686	-0.0685329	0.269	0.284	-0.015	AM.10	NEG6h_RxL	CAMP	FALSE	Resister_MtbNEG.6h	LTBI_MtbNEG.6h
AM.11.NEG6h_RxL.CAMP	0.175318	-0.0878684	0.289	0.346	-0.057	AM.11	NEG6h_RxL	CAMP	FALSE	Resister_MtbNEG.6h	LTBI_MtbNEG.6h
AM.2.NEG6h_RxL.CAMP	0.015139	-0.0051016	0.311	0.264	0.047	AM.2	NEG6h_RxL	CAMP	FALSE	Resister_MtbNEG.6h	LTBI_MtbNEG.6h
AM.3.NEG6h_RxL.CAMP	0.0287002	-0.020334	0.365	0.324	0.041	AM.3	NEG6h_RxL	CAMP	FALSE	Resister_MtbNEG.6h	LTBI_MtbNEG.6h
AM.5.NEG6h_RxL.CAMP	0.366112	-0.0233043	0.362	0.322	0.04	AM.5	NEG6h_RxL	CAMP	FALSE	Resister_MtbNEG.6h	LTBI_MtbNEG.6h
AM.6.NEG6h_RxL.CAMP	0.612476	-0.0544211	0.414	0.395	0.019	AM.6	NEG6h_RxL	CAMP	FALSE	Resister_MtbNEG.6h	LTBI_MtbNEG.6h
AM.7.NEG6h_RxL.CAMP	0.937553	0.00507098	0.339	0.329	0.01	AM.7	NEG6h_RxL	CAMP	FALSE	Resister_MtbNEG.6h	LTBI_MtbNEG.6h
AM.8.NEG6h_RxL.CAMP	0.919365	-0.0454917	0.292	0.289	0.003	AM.8	NEG6h_RxL	CAMP	FALSE	Resister_MtbNEG.6h	LTBI_MtbNEG.6h
MoAM.4.NEG6h_RxL.CAMP	0.520915	-0.00609145	0.102	0.093	0.009	MoAM.4	NEG6h_RxL	CAMP	FALSE	Resister_MtbNEG.6h	LTBI_MtbNEG.6h
AM.0.R24h_IxN.CAMP	0.00323541	-0.0178349	0.231	0.259	-0.028	AM.0	R24h_IxN	CAMP	FALSE	Resister_MtbINF.24h	Resister_MtbNEG.24h
AM.1.R24h_IxN.CAMP	0.0305771	-0.0117381	0.154	0.176	-0.022	AM.1	R24h_IxN	CAMP	FALSE	Resister_MtbINF.24h	Resister_MtbNEG.24h
AM.10.R24h_IxN.CAMP	0.252117	0.0291539	0.152	0.113	0.039	AM.10	R24h_IxN	CAMP	FALSE	Resister_MtbINF.24h	Resister_MtbNEG.24h
AM.11.R24h_IxN.CAMP	0.482378	-0.0640013	0.148	0.2	-0.052	AM.11	R24h_IxN	CAMP	FALSE	Resister_MtbINF.24h	Resister_MtbNEG.24h
AM.2.R24h_IxN.CAMP	0.225869	-0.0219935	0.197	0.209	-0.012	AM.2	R24h_IxN	CAMP	FALSE	Resister_MtbINF.24h	Resister_MtbNEG.24h
AM.3.R24h_IxN.CAMP	0.357664	-0.0179144	0.186	0.22	-0.034	AM.3	R24h_IxN	CAMP	FALSE	Resister_MtbINF.24h	Resister_MtbNEG.24h
AM.5.R24h_IxN.CAMP	0.450852	-0.011236	0.173	0.188	-0.015	AM.5	R24h_IxN	CAMP	FALSE	Resister_MtbINF.24h	Resister_MtbNEG.24h
AM.6.R24h_IxN.CAMP	0.069446	-0.0245845	0.205	0.245	-0.04	AM.6	R24h_IxN	CAMP	FALSE	Resister_MtbINF.24h	Resister_MtbNEG.24h
AM.7.R24h_IxN.CAMP	0.0125982	-0.0656712	0.188	0.237	-0.049	AM.7	R24h_IxN	CAMP	FALSE	Resister_MtbINF.24h	Resister_MtbNEG.24h
AM.8.R24h_IxN.CAMP	0.168273	-0.0118931	0.183	0.209	-0.026	AM.8	R24h_IxN	CAMP	FALSE	Resister_MtbINF.24h	Resister_MtbNEG.24h
AM.0.R6h_IxN.CAMP	0.0394864	0.0186173	0.4	0.381	0.019	AM.0	R6h_IxN	CAMP	FALSE	Resister_MtbINF.6h	Resister_MtbNEG.6h
AM.1.R6h_IxN.CAMP	0.037375	0.0332582	0.272	0.252	0.02	AM.1	R6h_IxN	CAMP	FALSE	Resister_MtbINF.6h	Resister_MtbNEG.6h
AM.10.R6h_IxN.CAMP	0.907831	0.0292706	0.264	0.269	-0.005	AM.10	R6h_IxN	CAMP	FALSE	Resister_MtbINF.6h	Resister_MtbNEG.6h
AM.11.R6h_IxN.CAMP	0.0969816	0.0962214	0.376	0.289	0.087	AM.11	R6h_IxN	CAMP	FALSE	Resister_MtbINF.6h	Resister_MtbNEG.6h
AM.2.R6h_IxN.CAMP	0.675846	-0.0101048	0.302	0.311	-0.009	AM.2	R6h_IxN	CAMP	FALSE	Resister_MtbINF.6h	Resister_MtbNEG.6h
AM.3.R6h_IxN.CAMP	0.00299838	-0.0264558	0.331	0.365	-0.034	AM.3	R6h_IxN	CAMP	FALSE	Resister_MtbINF.6h	Resister_MtbNEG.6h
AM.5.R6h_IxN.CAMP	0.0550383	-0.0290382	0.319	0.362	-0.043	AM.5	R6h_IxN	CAMP	FALSE	Resister_MtbINF.6h	Resister_MtbNEG.6h
AM.6.R6h_IxN.CAMP	0.591708	0.0142817	0.382	0.414	-0.032	AM.6	R6h_IxN	CAMP	FALSE	Resister_MtbINF.6h	Resister_MtbNEG.6h
AM.7.R6h_IxN.CAMP	0.347418	0.0125526	0.361	0.339	0.022	AM.7	R6h_IxN	CAMP	FALSE	Resister_MtbINF.6h	Resister_MtbNEG.6h
AM.8.R6h_IxN.CAMP	0.233913	-0.0279231	0.218	0.292	-0.074	AM.8	R6h_IxN	CAMP	FALSE	Resister_MtbINF.6h	Resister_MtbNEG.6h
MoAM.4.R6h_IxN.CAMP	0.128446	-0.0163504	0.082	0.102	-0.02	MoAM.4	R6h_IxN	CAMP	FALSE	Resister_MtbINF.6h	Resister_MtbNEG.6h
AM.0.INF24h_RxL.DEFB1	0.73	0.00456544	0.454	0.442	0.012	AM.0	INF24h_RxL	DEFB1	FALSE	Resister_MtbINF.24h	LTBI_MtbINF.24h
AM.1.INF24h_RxL.DEFB1	0.000303496	-0.0406177	0.368	0.398	-0.03	AM.1	INF24h_RxL	DEFB1	FALSE	Resister_MtbINF.24h	LTBI_MtbINF.24h
AM.10.INF24h_RxL.DEFB1	0.573116	0.0648837	0.272	0.263	0.009	AM.10	INF24h_RxL	DEFB1	FALSE	Resister_MtbINF.24h	LTBI_MtbINF.24h
AM.11.INF24h_RxL.DEFB1	0.988028	0.0275789	0.37	0.375	-0.005	AM.11	INF24h_RxL	DEFB1	FALSE	Resister_MtbINF.24h	LTBI_MtbINF.24h
AM.2.INF24h_RxL.DEFB1	0.507362	-0.0160818	0.35	0.347	0.003	AM.2	INF24h_RxL	DEFB1	FALSE	Resister_MtbINF.24h	LTBI_MtbINF.24h
AM.3.INF24h_RxL.DEFB1	2.7697e-19	0.272761	0.468	0.238	0.23	AM.3	INF24h_RxL	DEFB1	TRUE	Resister_MtbINF.24h	LTBI_MtbINF.24h
AM.5.INF24h_RxL.DEFB1	0.383463	-0.0231233	0.305	0.307	-0.002	AM.5	INF24h_RxL	DEFB1	FALSE	Resister_MtbINF.24h	LTBI_MtbINF.24h
AM.6.INF24h_RxL.DEFB1	0.43858	0.00490349	0.444	0.413	0.031	AM.6	INF24h_RxL	DEFB1	FALSE	Resister_MtbINF.24h	LTBI_MtbINF.24h
AM.7.INF24h_RxL.DEFB1	3.10876e-06	0.0704245	0.567	0.49	0.077	AM.7	INF24h_RxL	DEFB1	FALSE	Resister_MtbINF.24h	LTBI_MtbINF.24h
AM.8.INF24h_RxL.DEFB1	1.33112e-07	0.127496	0.45	0.363	0.087	AM.8	INF24h_RxL	DEFB1	TRUE	Resister_MtbINF.24h	LTBI_MtbINF.24h
MoAM.4.INF24h_RxL.DEFB1	9.64684e-05	-0.0469088	0.176	0.228	-0.052	MoAM.4	INF24h_RxL	DEFB1	FALSE	Resister_MtbINF.24h	LTBI_MtbINF.24h
AM.0.INF6h_RxL.DEFB1	0.752451	0.00182058	0.599	0.577	0.022	AM.0	INF6h_RxL	DEFB1	FALSE	Resister_MtbINF.6h	LTBI_MtbINF.6h
AM.1.INF6h_RxL.DEFB1	0.0238611	0.0255448	0.547	0.508	0.039	AM.1	INF6h_RxL	DEFB1	FALSE	Resister_MtbINF.6h	LTBI_MtbINF.6h
AM.10.INF6h_RxL.DEFB1	0.748787	-0.00199219	0.508	0.473	0.035	AM.10	INF6h_RxL	DEFB1	FALSE	Resister_MtbINF.6h	LTBI_MtbINF.6h
AM.11.INF6h_RxL.DEFB1	0.0995346	0.0977888	0.752	0.675	0.077	AM.11	INF6h_RxL	DEFB1	FALSE	Resister_MtbINF.6h	LTBI_MtbINF.6h
AM.2.INF6h_RxL.DEFB1	0.152663	0.0103783	0.528	0.491	0.037	AM.2	INF6h_RxL	DEFB1	FALSE	Resister_MtbINF.6h	LTBI_MtbINF.6h
AM.3.INF6h_RxL.DEFB1	1.69953e-08	0.0487927	0.577	0.505	0.072	AM.3	INF6h_RxL	DEFB1	FALSE	Resister_MtbINF.6h	LTBI_MtbINF.6h
AM.5.INF6h_RxL.DEFB1	1.07376e-20	0.186411	0.59	0.429	0.161	AM.5	INF6h_RxL	DEFB1	TRUE	Resister_MtbINF.6h	LTBI_MtbINF.6h
AM.6.INF6h_RxL.DEFB1	0.00406467	0.0319178	0.643	0.551	0.092	AM.6	INF6h_RxL	DEFB1	FALSE	Resister_MtbINF.6h	LTBI_MtbINF.6h
AM.7.INF6h_RxL.DEFB1	0.0081649	0.0442158	0.59	0.518	0.072	AM.7	INF6h_RxL	DEFB1	FALSE	Resister_MtbINF.6h	LTBI_MtbINF.6h
AM.8.INF6h_RxL.DEFB1	0.00187252	0.2435	0.667	0.561	0.106	AM.8	INF6h_RxL	DEFB1	TRUE	Resister_MtbINF.6h	LTBI_MtbINF.6h
MoAM.4.INF6h_RxL.DEFB1	0.000965948	-0.0777358	0.287	0.329	-0.042	MoAM.4	INF6h_RxL	DEFB1	FALSE	Resister_MtbINF.6h	LTBI_MtbINF.6h
AM.0.L24h_IxN.DEFB1	1.73576e-06	0.0178464	0.442	0.391	0.051	AM.0	L24h_IxN	DEFB1	FALSE	LTBI_MtbINF.24h	LTBI_MtbNEG.24h
AM.1.L24h_IxN.DEFB1	1.59575e-07	0.0156687	0.398	0.332	0.066	AM.1	L24h_IxN	DEFB1	FALSE	LTBI_MtbINF.24h	LTBI_MtbNEG.24h
AM.10.L24h_IxN.DEFB1	0.0830535	0.0191716	0.263	0.195	0.068	AM.10	L24h_IxN	DEFB1	FALSE	LTBI_MtbINF.24h	LTBI_MtbNEG.24h
AM.11.L24h_IxN.DEFB1	0.721281	-0.000225721	0.375	0.33	0.045	AM.11	L24h_IxN	DEFB1	FALSE	LTBI_MtbINF.24h	LTBI_MtbNEG.24h
AM.2.L24h_IxN.DEFB1	3.74119e-07	0.0330375	0.347	0.291	0.056	AM.2	L24h_IxN	DEFB1	FALSE	LTBI_MtbINF.24h	LTBI_MtbNEG.24h
AM.3.L24h_IxN.DEFB1	0.245933	0.0113358	0.238	0.206	0.032	AM.3	L24h_IxN	DEFB1	FALSE	LTBI_MtbINF.24h	LTBI_MtbNEG.24h
AM.5.L24h_IxN.DEFB1	0.00154688	0.0445202	0.307	0.27	0.037	AM.5	L24h_IxN	DEFB1	FALSE	LTBI_MtbINF.24h	LTBI_MtbNEG.24h
AM.6.L24h_IxN.DEFB1	0.00201458	0.041548	0.413	0.358	0.055	AM.6	L24h_IxN	DEFB1	FALSE	LTBI_MtbINF.24h	LTBI_MtbNEG.24h
AM.7.L24h_IxN.DEFB1	0.000892085	0.0527843	0.49	0.399	0.091	AM.7	L24h_IxN	DEFB1	FALSE	LTBI_MtbINF.24h	LTBI_MtbNEG.24h
AM.8.L24h_IxN.DEFB1	0.634706	0.000981458	0.363	0.351	0.012	AM.8	L24h_IxN	DEFB1	FALSE	LTBI_MtbINF.24h	LTBI_MtbNEG.24h
MoAM.4.L24h_IxN.DEFB1	3.59255e-06	0.0388371	0.228	0.174	0.054	MoAM.4	L24h_IxN	DEFB1	FALSE	LTBI_MtbINF.24h	LTBI_MtbNEG.24h
AM.0.L6h_IxN.DEFB1	0.104191	-0.011902	0.577	0.587	-0.01	AM.0	L6h_IxN	DEFB1	FALSE	LTBI_MtbINF.6h	LTBI_MtbNEG.6h
AM.1.L6h_IxN.DEFB1	0.000322492	-0.0324153	0.508	0.543	-0.035	AM.1	L6h_IxN	DEFB1	FALSE	LTBI_MtbINF.6h	LTBI_MtbNEG.6h
AM.10.L6h_IxN.DEFB1	0.340857	0.0524094	0.473	0.457	0.016	AM.10	L6h_IxN	DEFB1	FALSE	LTBI_MtbINF.6h	LTBI_MtbNEG.6h
AM.11.L6h_IxN.DEFB1	0.337334	-0.029487	0.675	0.741	-0.066	AM.11	L6h_IxN	DEFB1	FALSE	LTBI_MtbINF.6h	LTBI_MtbNEG.6h
AM.2.L6h_IxN.DEFB1	0.00186703	-0.0319999	0.491	0.52	-0.029	AM.2	L6h_IxN	DEFB1	FALSE	LTBI_MtbINF.6h	LTBI_MtbNEG.6h
AM.3.L6h_IxN.DEFB1	3.47371e-05	-0.0289185	0.505	0.547	-0.042	AM.3	L6h_IxN	DEFB1	FALSE	LTBI_MtbINF.6h	LTBI_MtbNEG.6h
AM.5.L6h_IxN.DEFB1	0.146435	-0.015713	0.429	0.448	-0.019	AM.5	L6h_IxN	DEFB1	FALSE	LTBI_MtbINF.6h	LTBI_MtbNEG.6h
AM.6.L6h_IxN.DEFB1	0.36136	-0.00746373	0.551	0.57	-0.019	AM.6	L6h_IxN	DEFB1	FALSE	LTBI_MtbINF.6h	LTBI_MtbNEG.6h
AM.7.L6h_IxN.DEFB1	0.116358	0.0575003	0.518	0.52	-0.002	AM.7	L6h_IxN	DEFB1	FALSE	LTBI_MtbINF.6h	LTBI_MtbNEG.6h
AM.8.L6h_IxN.DEFB1	0.00595969	-0.123782	0.561	0.651	-0.09	AM.8	L6h_IxN	DEFB1	TRUE	LTBI_MtbINF.6h	LTBI_MtbNEG.6h
MoAM.4.L6h_IxN.DEFB1	0.257656	-0.0272071	0.329	0.339	-0.01	MoAM.4	L6h_IxN	DEFB1	FALSE	LTBI_MtbINF.6h	LTBI_MtbNEG.6h
AM.0.NEG24h_RxL.DEFB1	4.73687e-22	-0.105034	0.353	0.391	-0.038	AM.0	NEG24h_RxL	DEFB1	TRUE	Resister_MtbNEG.24h	LTBI_MtbNEG.24h
AM.1.NEG24h_RxL.DEFB1	9.22527e-11	-0.0878701	0.306	0.332	-0.026	AM.1	NEG24h_RxL	DEFB1	FALSE	Resister_MtbNEG.24h	LTBI_MtbNEG.24h
AM.10.NEG24h_RxL.DEFB1	0.996202	-0.0337229	0.202	0.195	0.007	AM.10	NEG24h_RxL	DEFB1	FALSE	Resister_MtbNEG.24h	LTBI_MtbNEG.24h
AM.11.NEG24h_RxL.DEFB1	0.956853	-0.0514205	0.382	0.33	0.052	AM.11	NEG24h_RxL	DEFB1	FALSE	Resister_MtbNEG.24h	LTBI_MtbNEG.24h
AM.2.NEG24h_RxL.DEFB1	9.64536e-05	-0.0686287	0.278	0.291	-0.013	AM.2	NEG24h_RxL	DEFB1	FALSE	Resister_MtbNEG.24h	LTBI_MtbNEG.24h
AM.3.NEG24h_RxL.DEFB1	2.99303e-07	0.157617	0.386	0.206	0.18	AM.3	NEG24h_RxL	DEFB1	TRUE	Resister_MtbNEG.24h	LTBI_MtbNEG.24h
AM.5.NEG24h_RxL.DEFB1	0.285096	-0.0267477	0.256	0.27	-0.014	AM.5	NEG24h_RxL	DEFB1	FALSE	Resister_MtbNEG.24h	LTBI_MtbNEG.24h
AM.6.NEG24h_RxL.DEFB1	3.30159e-07	-0.116264	0.298	0.358	-0.06	AM.6	NEG24h_RxL	DEFB1	TRUE	Resister_MtbNEG.24h	LTBI_MtbNEG.24h
AM.7.NEG24h_RxL.DEFB1	0.0159556	-0.118008	0.379	0.399	-0.02	AM.7	NEG24h_RxL	DEFB1	TRUE	Resister_MtbNEG.24h	LTBI_MtbNEG.24h
AM.8.NEG24h_RxL.DEFB1	2.50866e-07	0.0660469	0.454	0.351	0.103	AM.8	NEG24h_RxL	DEFB1	FALSE	Resister_MtbNEG.24h	LTBI_MtbNEG.24h
MoAM.4.NEG24h_RxL.DEFB1	0.000906016	-0.0482293	0.144	0.174	-0.03	MoAM.4	NEG24h_RxL	DEFB1	FALSE	Resister_MtbNEG.24h	LTBI_MtbNEG.24h
AM.0.NEG6h_RxL.DEFB1	0.000786029	-0.0339221	0.584	0.587	-0.003	AM.0	NEG6h_RxL	DEFB1	FALSE	Resister_MtbNEG.6h	LTBI_MtbNEG.6h
AM.1.NEG6h_RxL.DEFB1	0.000574939	-0.043775	0.525	0.543	-0.018	AM.1	NEG6h_RxL	DEFB1	FALSE	Resister_MtbNEG.6h	LTBI_MtbNEG.6h
AM.10.NEG6h_RxL.DEFB1	0.0750014	0.0540063	0.55	0.457	0.093	AM.10	NEG6h_RxL	DEFB1	FALSE	Resister_MtbNEG.6h	LTBI_MtbNEG.6h
AM.11.NEG6h_RxL.DEFB1	0.119877	0.101227	0.811	0.741	0.07	AM.11	NEG6h_RxL	DEFB1	FALSE	Resister_MtbNEG.6h	LTBI_MtbNEG.6h
AM.2.NEG6h_RxL.DEFB1	0.0986347	-0.0205748	0.512	0.52	-0.008	AM.2	NEG6h_RxL	DEFB1	FALSE	Resister_MtbNEG.6h	LTBI_MtbNEG.6h
AM.3.NEG6h_RxL.DEFB1	0.000319963	0.0418109	0.591	0.547	0.044	AM.3	NEG6h_RxL	DEFB1	FALSE	Resister_MtbNEG.6h	LTBI_MtbNEG.6h
AM.5.NEG6h_RxL.DEFB1	7.83043e-11	0.130394	0.544	0.448	0.096	AM.5	NEG6h_RxL	DEFB1	TRUE	Resister_MtbNEG.6h	LTBI_MtbNEG.6h
AM.6.NEG6h_RxL.DEFB1	0.287488	0.0102508	0.639	0.57	0.069	AM.6	NEG6h_RxL	DEFB1	FALSE	Resister_MtbNEG.6h	LTBI_MtbNEG.6h
AM.7.NEG6h_RxL.DEFB1	1.07055e-07	0.151848	0.617	0.52	0.097	AM.7	NEG6h_RxL	DEFB1	TRUE	Resister_MtbNEG.6h	LTBI_MtbNEG.6h
AM.8.NEG6h_RxL.DEFB1	0.783431	-0.000897137	0.62	0.651	-0.031	AM.8	NEG6h_RxL	DEFB1	FALSE	Resister_MtbNEG.6h	LTBI_MtbNEG.6h
MoAM.4.NEG6h_RxL.DEFB1	0.0133533	-0.065081	0.309	0.339	-0.03	MoAM.4	NEG6h_RxL	DEFB1	FALSE	Resister_MtbNEG.6h	LTBI_MtbNEG.6h
AM.0.R24h_IxN.DEFB1	6.67037e-34	0.127446	0.454	0.353	0.101	AM.0	R24h_IxN	DEFB1	TRUE	Resister_MtbINF.24h	Resister_MtbNEG.24h
AM.1.R24h_IxN.DEFB1	3.83677e-09	0.0629212	0.368	0.306	0.062	AM.1	R24h_IxN	DEFB1	FALSE	Resister_MtbINF.24h	Resister_MtbNEG.24h
AM.10.R24h_IxN.DEFB1	0.0534447	0.117778	0.272	0.202	0.07	AM.10	R24h_IxN	DEFB1	TRUE	Resister_MtbINF.24h	Resister_MtbNEG.24h
AM.11.R24h_IxN.DEFB1	0.909854	0.0787737	0.37	0.382	-0.012	AM.11	R24h_IxN	DEFB1	FALSE	Resister_MtbINF.24h	Resister_MtbNEG.24h
AM.2.R24h_IxN.DEFB1	3.52113e-10	0.0855843	0.35	0.278	0.072	AM.2	R24h_IxN	DEFB1	FALSE	Resister_MtbINF.24h	Resister_MtbNEG.24h
AM.3.R24h_IxN.DEFB1	0.00320703	0.12648	0.468	0.386	0.082	AM.3	R24h_IxN	DEFB1	TRUE	Resister_MtbINF.24h	Resister_MtbNEG.24h
AM.5.R24h_IxN.DEFB1	0.016384	0.0481446	0.305	0.256	0.049	AM.5	R24h_IxN	DEFB1	FALSE	Resister_MtbINF.24h	Resister_MtbNEG.24h
AM.6.R24h_IxN.DEFB1	1.52286e-12	0.162715	0.444	0.298	0.146	AM.6	R24h_IxN	DEFB1	TRUE	Resister_MtbINF.24h	Resister_MtbNEG.24h
AM.7.R24h_IxN.DEFB1	6.66581e-18	0.241217	0.567	0.379	0.188	AM.7	R24h_IxN	DEFB1	TRUE	Resister_MtbINF.24h	Resister_MtbNEG.24h
AM.8.R24h_IxN.DEFB1	0.184952	0.0624301	0.45	0.454	-0.004	AM.8	R24h_IxN	DEFB1	FALSE	Resister_MtbINF.24h	Resister_MtbNEG.24h
MoAM.4.R24h_IxN.DEFB1	0.00671449	0.0401577	0.176	0.144	0.032	MoAM.4	R24h_IxN	DEFB1	FALSE	Resister_MtbINF.24h	Resister_MtbNEG.24h
AM.0.R6h_IxN.DEFB1	0.0430375	0.0238407	0.599	0.584	0.015	AM.0	R6h_IxN	DEFB1	FALSE	Resister_MtbINF.6h	Resister_MtbNEG.6h
AM.1.R6h_IxN.DEFB1	0.0190888	0.0369045	0.547	0.525	0.022	AM.1	R6h_IxN	DEFB1	FALSE	Resister_MtbINF.6h	Resister_MtbNEG.6h
AM.10.R6h_IxN.DEFB1	0.547679	-0.00358908	0.508	0.55	-0.042	AM.10	R6h_IxN	DEFB1	FALSE	Resister_MtbINF.6h	Resister_MtbNEG.6h
AM.11.R6h_IxN.DEFB1	0.639517	-0.0329257	0.752	0.811	-0.059	AM.11	R6h_IxN	DEFB1	FALSE	Resister_MtbINF.6h	Resister_MtbNEG.6h
AM.2.R6h_IxN.DEFB1	0.533078	-0.00104676	0.528	0.512	0.016	AM.2	R6h_IxN	DEFB1	FALSE	Resister_MtbINF.6h	Resister_MtbNEG.6h
AM.3.R6h_IxN.DEFB1	0.082236	-0.0219367	0.577	0.591	-0.014	AM.3	R6h_IxN	DEFB1	FALSE	Resister_MtbINF.6h	Resister_MtbNEG.6h
AM.5.R6h_IxN.DEFB1	0.025306	0.0403039	0.59	0.544	0.046	AM.5	R6h_IxN	DEFB1	FALSE	Resister_MtbINF.6h	Resister_MtbNEG.6h
AM.6.R6h_IxN.DEFB1	0.296623	0.0142033	0.643	0.639	0.004	AM.6	R6h_IxN	DEFB1	FALSE	Resister_MtbINF.6h	Resister_MtbNEG.6h
AM.7.R6h_IxN.DEFB1	0.0904447	-0.0501318	0.59	0.617	-0.027	AM.7	R6h_IxN	DEFB1	FALSE	Resister_MtbINF.6h	Resister_MtbNEG.6h
AM.8.R6h_IxN.DEFB1	0.15293	0.120615	0.667	0.62	0.047	AM.8	R6h_IxN	DEFB1	FALSE	Resister_MtbINF.6h	Resister_MtbNEG.6h
MoAM.4.R6h_IxN.DEFB1	0.119162	-0.0398618	0.287	0.309	-0.022	MoAM.4	R6h_IxN	DEFB1	FALSE	Resister_MtbINF.6h	Resister_MtbNEG.6h
L.8.INF24h_RxL.GNLY	0.99642	0.0589216	0.946	0.867	0.079	L.8	INF24h_RxL	GNLY	FALSE	Resister_MtbINF.24h	LTBI_MtbINF.24h
L.8.INF6h_RxL.GNLY	0.780641	0.0111576	0.927	0.933	-0.006	L.8	INF6h_RxL	GNLY	FALSE	Resister_MtbINF.6h	LTBI_MtbINF.6h
L.8.L24h_IxN.GNLY	0.854005	0.0706561	0.867	0.852	0.015	L.8	L24h_IxN	GNLY	FALSE	LTBI_MtbINF.24h	LTBI_MtbNEG.24h
L.8.L6h_IxN.GNLY	0.00890313	0.423078	0.933	0.775	0.158	L.8	L6h_IxN	GNLY	TRUE	LTBI_MtbINF.6h	LTBI_MtbNEG.6h
L.8.NEG24h_RxL.GNLY	0.986951	0.0723663	0.941	0.852	0.089	L.8	NEG24h_RxL	GNLY	FALSE	Resister_MtbNEG.24h	LTBI_MtbNEG.24h
L.8.NEG6h_RxL.GNLY	0.00148086	0.302309	0.862	0.775	0.087	L.8	NEG6h_RxL	GNLY	TRUE	Resister_MtbNEG.6h	LTBI_MtbNEG.6h
L.8.R24h_IxN.GNLY	0.140208	0.0572115	0.946	0.941	0.005	L.8	R24h_IxN	GNLY	FALSE	Resister_MtbINF.24h	Resister_MtbNEG.24h
L.8.R6h_IxN.GNLY	0.00125643	0.131926	0.927	0.862	0.065	L.8	R6h_IxN	GNLY	TRUE	Resister_MtbINF.6h	Resister_MtbNEG.6h
L.8.INF24h_RxL.GZMB	0.383195	-0.158598	0.587	0.533	0.054	L.8	INF24h_RxL	GZMB	FALSE	Resister_MtbINF.24h	LTBI_MtbINF.24h
L.8.INF6h_RxL.GZMB	0.717738	0.0776674	0.577	0.467	0.11	L.8	INF6h_RxL	GZMB	FALSE	Resister_MtbINF.6h	LTBI_MtbINF.6h
L.8.L24h_IxN.GZMB	0.299835	0.337303	0.533	0.296	0.237	L.8	L24h_IxN	GZMB	FALSE	LTBI_MtbINF.24h	LTBI_MtbNEG.24h
L.8.L6h_IxN.GZMB	0.847209	-0.00814221	0.467	0.5	-0.033	L.8	L6h_IxN	GZMB	FALSE	LTBI_MtbINF.6h	LTBI_MtbNEG.6h
L.8.NEG24h_RxL.GZMB	0.87452	-0.17004	0.376	0.296	0.08	L.8	NEG24h_RxL	GZMB	FALSE	Resister_MtbNEG.24h	LTBI_MtbNEG.24h
L.8.NEG6h_RxL.GZMB	0.751033	0.0700489	0.596	0.5	0.096	L.8	NEG6h_RxL	GZMB	FALSE	Resister_MtbNEG.6h	LTBI_MtbNEG.6h
L.8.R24h_IxN.GZMB	0.000588792	0.348745	0.587	0.376	0.211	L.8	R24h_IxN	GZMB	TRUE	Resister_MtbINF.24h	Resister_MtbNEG.24h
L.8.R6h_IxN.GZMB	0.989072	-0.000523683	0.577	0.596	-0.019	L.8	R6h_IxN	GZMB	FALSE	Resister_MtbINF.6h	Resister_MtbNEG.6h
AM.0.INF24h_RxL.HLA-E	0.875858	0.0194563	0.998	0.995	0.003	AM.0	INF24h_RxL	HLA-E	FALSE	Resister_MtbINF.24h	LTBI_MtbINF.24h
AM.1.INF24h_RxL.HLA-E	0.000115985	-0.0567324	0.991	0.994	-0.003	AM.1	INF24h_RxL	HLA-E	FALSE	Resister_MtbINF.24h	LTBI_MtbINF.24h
AM.10.INF24h_RxL.HLA-E	0.00657488	-0.133356	0.993	1	-0.007	AM.10	INF24h_RxL	HLA-E	TRUE	Resister_MtbINF.24h	LTBI_MtbINF.24h
AM.11.INF24h_RxL.HLA-E	0.287196	0.171121	1	1	0	AM.11	INF24h_RxL	HLA-E	FALSE	Resister_MtbINF.24h	LTBI_MtbINF.24h
AM.2.INF24h_RxL.HLA-E	0.00257127	-0.0416772	0.998	0.996	0.002	AM.2	INF24h_RxL	HLA-E	FALSE	Resister_MtbINF.24h	LTBI_MtbINF.24h
AM.3.INF24h_RxL.HLA-E	0.000470376	-0.194997	0.979	0.961	0.018	AM.3	INF24h_RxL	HLA-E	TRUE	Resister_MtbINF.24h	LTBI_MtbINF.24h
AM.5.INF24h_RxL.HLA-E	8.99082e-47	-0.362481	0.979	0.993	-0.014	AM.5	INF24h_RxL	HLA-E	TRUE	Resister_MtbINF.24h	LTBI_MtbINF.24h
AM.6.INF24h_RxL.HLA-E	0.0662303	0.0822396	0.999	0.996	0.003	AM.6	INF24h_RxL	HLA-E	FALSE	Resister_MtbINF.24h	LTBI_MtbINF.24h
AM.7.INF24h_RxL.HLA-E	0.00185326	0.0661101	0.999	0.997	0.002	AM.7	INF24h_RxL	HLA-E	FALSE	Resister_MtbINF.24h	LTBI_MtbINF.24h
AM.8.INF24h_RxL.HLA-E	0.0833119	-0.0387799	0.996	0.984	0.012	AM.8	INF24h_RxL	HLA-E	FALSE	Resister_MtbINF.24h	LTBI_MtbINF.24h
DC.9.INF24h_RxL	0.530532	-0.0847805	0.931	0.886	0.045	DC.9	INF24h_RxL	HLA-E	FALSE	Resister_MtbINF.24h	LTBI_MtbINF.24h
MoAM.4.INF24h_RxL.HLA-E	0.22736	-0.00591584	0.991	0.989	0.002	MoAM.4	INF24h_RxL	HLA-E	FALSE	Resister_MtbINF.24h	LTBI_MtbINF.24h
AM.0.INF6h_RxL.HLA-E	0.00573185	-0.0347864	0.994	0.998	-0.004	AM.0	INF6h_RxL	HLA-E	FALSE	Resister_MtbINF.6h	LTBI_MtbINF.6h
AM.1.INF6h_RxL.HLA-E	0.875663	-0.00855932	0.99	0.994	-0.004	AM.1	INF6h_RxL	HLA-E	FALSE	Resister_MtbINF.6h	LTBI_MtbINF.6h
AM.10.INF6h_RxL.HLA-E	0.0383699	-0.102054	1	1	0	AM.10	INF6h_RxL	HLA-E	TRUE	Resister_MtbINF.6h	LTBI_MtbINF.6h
AM.11.INF6h_RxL.HLA-E	0.0522452	-0.111177	0.983	1	-0.017	AM.11	INF6h_RxL	HLA-E	TRUE	Resister_MtbINF.6h	LTBI_MtbINF.6h
AM.2.INF6h_RxL.HLA-E	0.783463	-0.0134462	0.996	0.996	0	AM.2	INF6h_RxL	HLA-E	FALSE	Resister_MtbINF.6h	LTBI_MtbINF.6h
AM.3.INF6h_RxL.HLA-E	0.000283671	-0.0591418	0.985	0.972	0.013	AM.3	INF6h_RxL	HLA-E	FALSE	Resister_MtbINF.6h	LTBI_MtbINF.6h
AM.5.INF6h_RxL.HLA-E	5.0629e-07	-0.107622	0.994	0.996	-0.002	AM.5	INF6h_RxL	HLA-E	TRUE	Resister_MtbINF.6h	LTBI_MtbINF.6h
AM.6.INF6h_RxL.HLA-E	1.85114e-13	-0.156909	0.994	0.999	-0.005	AM.6	INF6h_RxL	HLA-E	TRUE	Resister_MtbINF.6h	LTBI_MtbINF.6h
AM.7.INF6h_RxL.HLA-E	0.00833255	0.0353641	0.998	0.998	0	AM.7	INF6h_RxL	HLA-E	FALSE	Resister_MtbINF.6h	LTBI_MtbINF.6h
AM.8.INF6h_RxL.HLA-E	0.168134	-0.12043	0.989	0.98	0.009	AM.8	INF6h_RxL	HLA-E	FALSE	Resister_MtbINF.6h	LTBI_MtbINF.6h
DC.9.INF6h_RxL.HLA-E	0.7168	-0.00344799	0.885	0.901	-0.016	DC.9	INF6h_RxL	HLA-E	FALSE	Resister_MtbINF.6h	LTBI_MtbINF.6h
MoAM.4.INF6h_RxL.HLA-E	0.0290829	0.0362595	0.984	0.992	-0.008	MoAM.4	INF6h_RxL	HLA-E	FALSE	Resister_MtbINF.6h	LTBI_MtbINF.6h
AM.0.L24h_IxN.HLA-E	0	0.756407	0.995	0.981	0.014	AM.0	L24h_IxN	HLA-E	TRUE	LTBI_MtbINF.24h	LTBI_MtbNEG.24h
AM.1.L24h_IxN.HLA-E	0	0.695175	0.994	0.983	0.011	AM.1	L24h_IxN	HLA-E	TRUE	LTBI_MtbINF.24h	LTBI_MtbNEG.24h
AM.10.L24h_IxN.HLA-E	1.78351e-62	1.09601	1	0.978	0.022	AM.10	L24h_IxN	HLA-E	TRUE	LTBI_MtbINF.24h	LTBI_MtbNEG.24h
AM.11.L24h_IxN.HLA-E	1.24364e-06	0.660328	1	0.938	0.062	AM.11	L24h_IxN	HLA-E	TRUE	LTBI_MtbINF.24h	LTBI_MtbNEG.24h
AM.2.L24h_IxN.HLA-E	0	0.731852	0.996	0.987	0.009	AM.2	L24h_IxN	HLA-E	TRUE	LTBI_MtbINF.24h	LTBI_MtbNEG.24h
AM.3.L24h_IxN.HLA-E	5.53922e-54	0.886762	0.961	0.948	0.013	AM.3	L24h_IxN	HLA-E	TRUE	LTBI_MtbINF.24h	LTBI_MtbNEG.24h
AM.5.L24h_IxN.HLA-E	1.76238e-262	0.859396	0.993	0.984	0.009	AM.5	L24h_IxN	HLA-E	TRUE	LTBI_MtbINF.24h	LTBI_MtbNEG.24h
AM.6.L24h_IxN.HLA-E	2.87908e-206	0.720549	0.996	0.982	0.014	AM.6	L24h_IxN	HLA-E	TRUE	LTBI_MtbINF.24h	LTBI_MtbNEG.24h
AM.7.L24h_IxN.HLA-E	1.39186e-100	0.657409	0.997	0.994	0.003	AM.7	L24h_IxN	HLA-E	TRUE	LTBI_MtbINF.24h	LTBI_MtbNEG.24h
AM.8.L24h_IxN.HLA-E	2.30208e-168	0.708047	0.984	0.96	0.024	AM.8	L24h_IxN	HLA-E	TRUE	LTBI_MtbINF.24h	LTBI_MtbNEG.24h
DC.9.L24h_IxN	2.26363e-09	0.689296	0.886	0.824	0.062	DC.9	L24h_IxN	HLA-E	TRUE	LTBI_MtbINF.24h	LTBI_MtbNEG.24h
MoAM.4.L24h_IxN.HLA-E	2.06744e-202	0.667014	0.989	0.974	0.015	MoAM.4	L24h_IxN	HLA-E	TRUE	LTBI_MtbINF.24h	LTBI_MtbNEG.24h
AM.0.L6h_IxN.HLA-E	1.04147e-16	0.0670311	0.998	0.992	0.006	AM.0	L6h_IxN	HLA-E	FALSE	LTBI_MtbINF.6h	LTBI_MtbNEG.6h
AM.1.L6h_IxN.HLA-E	1.17765e-12	0.0713942	0.994	0.991	0.003	AM.1	L6h_IxN	HLA-E	FALSE	LTBI_MtbINF.6h	LTBI_MtbNEG.6h
AM.10.L6h_IxN.HLA-E	1.66975e-06	0.224778	1	0.996	0.004	AM.10	L6h_IxN	HLA-E	TRUE	LTBI_MtbINF.6h	LTBI_MtbNEG.6h
AM.11.L6h_IxN.HLA-E	0.621213	0.00488412	1	0.992	0.008	AM.11	L6h_IxN	HLA-E	FALSE	LTBI_MtbINF.6h	LTBI_MtbNEG.6h
AM.2.L6h_IxN.HLA-E	2.8462e-12	0.0827542	0.996	0.996	0	AM.2	L6h_IxN	HLA-E	FALSE	LTBI_MtbINF.6h	LTBI_MtbNEG.6h
AM.3.L6h_IxN.HLA-E	3.55659e-18	0.0953837	0.972	0.966	0.006	AM.3	L6h_IxN	HLA-E	FALSE	LTBI_MtbINF.6h	LTBI_MtbNEG.6h
AM.5.L6h_IxN.HLA-E	9.44648e-13	0.117165	0.996	0.987	0.009	AM.5	L6h_IxN	HLA-E	TRUE	LTBI_MtbINF.6h	LTBI_MtbNEG.6h
AM.6.L6h_IxN.HLA-E	1.93292e-13	0.131355	0.999	0.992	0.007	AM.6	L6h_IxN	HLA-E	TRUE	LTBI_MtbINF.6h	LTBI_MtbNEG.6h
AM.7.L6h_IxN.HLA-E	9.99164e-13	0.143742	0.998	0.998	0	AM.7	L6h_IxN	HLA-E	TRUE	LTBI_MtbINF.6h	LTBI_MtbNEG.6h
AM.8.L6h_IxN.HLA-E	2.40842e-05	0.245995	0.98	0.974	0.006	AM.8	L6h_IxN	HLA-E	TRUE	LTBI_MtbINF.6h	LTBI_MtbNEG.6h
DC.9.L6h_IxN.HLA-E	0.931866	0.0105289	0.901	0.894	0.007	DC.9	L6h_IxN	HLA-E	FALSE	LTBI_MtbINF.6h	LTBI_MtbNEG.6h
MoAM.4.L6h_IxN.HLA-E	1.34483e-07	0.127215	0.992	0.98	0.012	MoAM.4	L6h_IxN	HLA-E	TRUE	LTBI_MtbINF.6h	LTBI_MtbNEG.6h
AM.0.NEG24h_RxL.HLA-E	4.10676e-17	0.0964859	0.975	0.981	-0.006	AM.0	NEG24h_RxL	HLA-E	FALSE	Resister_MtbNEG.24h	LTBI_MtbNEG.24h
AM.1.NEG24h_RxL.HLA-E	0.000145257	0.0406517	0.985	0.983	0.002	AM.1	NEG24h_RxL	HLA-E	FALSE	Resister_MtbNEG.24h	LTBI_MtbNEG.24h
AM.10.NEG24h_RxL.HLA-E	9.27832e-06	0.266992	0.962	0.978	-0.016	AM.10	NEG24h_RxL	HLA-E	TRUE	Resister_MtbNEG.24h	LTBI_MtbNEG.24h
AM.11.NEG24h_RxL.HLA-E	0.00969954	0.252161	1	0.938	0.062	AM.11	NEG24h_RxL	HLA-E	TRUE	Resister_MtbNEG.24h	LTBI_MtbNEG.24h
AM.2.NEG24h_RxL.HLA-E	2.36964e-13	0.0987779	0.985	0.987	-0.002	AM.2	NEG24h_RxL	HLA-E	FALSE	Resister_MtbNEG.24h	LTBI_MtbNEG.24h
AM.3.NEG24h_RxL.HLA-E	1.7773e-11	0.331398	0.966	0.948	0.018	AM.3	NEG24h_RxL	HLA-E	TRUE	Resister_MtbNEG.24h	LTBI_MtbNEG.24h
AM.5.NEG24h_RxL.HLA-E	0.000330375	0.105984	0.962	0.984	-0.022	AM.5	NEG24h_RxL	HLA-E	TRUE	Resister_MtbNEG.24h	LTBI_MtbNEG.24h
AM.6.NEG24h_RxL.HLA-E	0.0172175	0.0706028	0.985	0.982	0.003	AM.6	NEG24h_RxL	HLA-E	FALSE	Resister_MtbNEG.24h	LTBI_MtbNEG.24h
AM.7.NEG24h_RxL.HLA-E	4.29853e-12	0.264359	0.991	0.994	-0.003	AM.7	NEG24h_RxL	HLA-E	TRUE	Resister_MtbNEG.24h	LTBI_MtbNEG.24h
AM.8.NEG24h_RxL.HLA-E	1.4319e-13	0.160508	0.985	0.96	0.025	AM.8	NEG24h_RxL	HLA-E	TRUE	Resister_MtbNEG.24h	LTBI_MtbNEG.24h
DC.9.NEG24h_RxL	0.113573	0.206791	0.796	0.824	-0.028	DC.9	NEG24h_RxL	HLA-E	FALSE	Resister_MtbNEG.24h	LTBI_MtbNEG.24h
MoAM.4.NEG24h_RxL.HLA-E	1.83037e-06	0.0844443	0.978	0.974	0.004	MoAM.4	NEG24h_RxL	HLA-E	FALSE	Resister_MtbNEG.24h	LTBI_MtbNEG.24h
AM.0.NEG6h_RxL.HLA-E	1.66821e-06	0.0473193	0.992	0.992	0	AM.0	NEG6h_RxL	HLA-E	FALSE	Resister_MtbNEG.6h	LTBI_MtbNEG.6h
AM.1.NEG6h_RxL.HLA-E	2.54335e-11	0.0878947	0.988	0.991	-0.003	AM.1	NEG6h_RxL	HLA-E	FALSE	Resister_MtbNEG.6h	LTBI_MtbNEG.6h
AM.10.NEG6h_RxL.HLA-E	0.317886	0.0446245	0.996	0.996	0	AM.10	NEG6h_RxL	HLA-E	FALSE	Resister_MtbNEG.6h	LTBI_MtbNEG.6h
AM.11.NEG6h_RxL.HLA-E	0.614912	-0.0462214	1	0.992	0.008	AM.11	NEG6h_RxL	HLA-E	FALSE	Resister_MtbNEG.6h	LTBI_MtbNEG.6h
AM.2.NEG6h_RxL.HLA-E	6.49297e-12	0.103007	0.996	0.996	0	AM.2	NEG6h_RxL	HLA-E	TRUE	Resister_MtbNEG.6h	LTBI_MtbNEG.6h
AM.3.NEG6h_RxL.HLA-E	4.80693e-08	0.0536755	0.982	0.966	0.016	AM.3	NEG6h_RxL	HLA-E	FALSE	Resister_MtbNEG.6h	LTBI_MtbNEG.6h
AM.5.NEG6h_RxL.HLA-E	0.797055	-0.0159352	0.986	0.987	-0.001	AM.5	NEG6h_RxL	HLA-E	FALSE	Resister_MtbNEG.6h	LTBI_MtbNEG.6h
AM.6.NEG6h_RxL.HLA-E	0.00540524	0.055533	0.994	0.992	0.002	AM.6	NEG6h_RxL	HLA-E	FALSE	Resister_MtbNEG.6h	LTBI_MtbNEG.6h
AM.7.NEG6h_RxL.HLA-E	4.18821e-07	0.115565	0.998	0.998	0	AM.7	NEG6h_RxL	HLA-E	TRUE	Resister_MtbNEG.6h	LTBI_MtbNEG.6h
AM.8.NEG6h_RxL.HLA-E	0.00140087	0.202284	0.964	0.974	-0.01	AM.8	NEG6h_RxL	HLA-E	TRUE	Resister_MtbNEG.6h	LTBI_MtbNEG.6h
DC.9.NEG6h_RxL	0.877335	0.0137448	0.86	0.894	-0.034	DC.9	NEG6h_RxL	HLA-E	FALSE	Resister_MtbNEG.6h	LTBI_MtbNEG.6h
MoAM.4.NEG6h_RxL.HLA-E	1.20865e-08	0.152336	0.982	0.98	0.002	MoAM.4	NEG6h_RxL	HLA-E	TRUE	Resister_MtbNEG.6h	LTBI_MtbNEG.6h
AM.0.R24h_IxN.HLA-E	0	0.679377	0.998	0.975	0.023	AM.0	R24h_IxN	HLA-E	TRUE	Resister_MtbINF.24h	Resister_MtbNEG.24h
AM.1.R24h_IxN.HLA-E	1.57119e-201	0.597791	0.991	0.985	0.006	AM.1	R24h_IxN	HLA-E	TRUE	Resister_MtbINF.24h	Resister_MtbNEG.24h
AM.10.R24h_IxN.HLA-E	3.57661e-15	0.695659	0.993	0.962	0.031	AM.10	R24h_IxN	HLA-E	TRUE	Resister_MtbINF.24h	Resister_MtbNEG.24h
AM.11.R24h_IxN.HLA-E	0.00170262	0.579288	1	1	0	AM.11	R24h_IxN	HLA-E	TRUE	Resister_MtbINF.24h	Resister_MtbNEG.24h
AM.2.R24h_IxN.HLA-E	5.91078e-154	0.591397	0.998	0.985	0.013	AM.2	R24h_IxN	HLA-E	TRUE	Resister_MtbINF.24h	Resister_MtbNEG.24h
AM.3.R24h_IxN.HLA-E	3.07639e-08	0.360367	0.979	0.966	0.013	AM.3	R24h_IxN	HLA-E	TRUE	Resister_MtbINF.24h	Resister_MtbNEG.24h
AM.5.R24h_IxN.HLA-E	1.41807e-18	0.390931	0.979	0.962	0.017	AM.5	R24h_IxN	HLA-E	TRUE	Resister_MtbINF.24h	Resister_MtbNEG.24h
AM.6.R24h_IxN.HLA-E	7.25861e-73	0.732186	0.999	0.985	0.014	AM.6	R24h_IxN	HLA-E	TRUE	Resister_MtbINF.24h	Resister_MtbNEG.24h
AM.7.R24h_IxN.HLA-E	1.55826e-33	0.45916	0.999	0.991	0.008	AM.7	R24h_IxN	HLA-E	TRUE	Resister_MtbINF.24h	Resister_MtbNEG.24h
AM.8.R24h_IxN.HLA-E	6.27637e-49	0.50876	0.996	0.985	0.011	AM.8	R24h_IxN	HLA-E	TRUE	Resister_MtbINF.24h	Resister_MtbNEG.24h
DC.9.R24h_IxN	0.000188772	0.397724	0.931	0.796	0.135	DC.9	R24h_IxN	HLA-E	TRUE	Resister_MtbINF.24h	Resister_MtbNEG.24h
MoAM.4.R24h_IxN.HLA-E	2.02856e-83	0.576654	0.991	0.978	0.013	MoAM.4	R24h_IxN	HLA-E	TRUE	Resister_MtbINF.24h	Resister_MtbNEG.24h
AM.0.R6h_IxN.HLA-E	0.56572	-0.0150747	0.994	0.992	0.002	AM.0	R6h_IxN	HLA-E	FALSE	Resister_MtbINF.6h	Resister_MtbNEG.6h
AM.1.R6h_IxN.HLA-E	0.404883	-0.0250599	0.99	0.988	0.002	AM.1	R6h_IxN	HLA-E	FALSE	Resister_MtbINF.6h	Resister_MtbNEG.6h
AM.10.R6h_IxN.HLA-E	0.108999	0.0780995	1	0.996	0.004	AM.10	R6h_IxN	HLA-E	FALSE	Resister_MtbINF.6h	Resister_MtbNEG.6h
AM.11.R6h_IxN.HLA-E	0.369369	-0.0600714	0.983	1	-0.017	AM.11	R6h_IxN	HLA-E	FALSE	Resister_MtbINF.6h	Resister_MtbNEG.6h
AM.2.R6h_IxN.HLA-E	0.158663	-0.0336991	0.996	0.996	0	AM.2	R6h_IxN	HLA-E	FALSE	Resister_MtbINF.6h	Resister_MtbNEG.6h
AM.3.R6h_IxN.HLA-E	0.545412	-0.0174337	0.985	0.982	0.003	AM.3	R6h_IxN	HLA-E	FALSE	Resister_MtbINF.6h	Resister_MtbNEG.6h
AM.5.R6h_IxN.HLA-E	0.137885	0.025478	0.994	0.986	0.008	AM.5	R6h_IxN	HLA-E	FALSE	Resister_MtbINF.6h	Resister_MtbNEG.6h
AM.6.R6h_IxN.HLA-E	0.000968094	-0.0810868	0.994	0.994	0	AM.6	R6h_IxN	HLA-E	FALSE	Resister_MtbINF.6h	Resister_MtbNEG.6h
AM.7.R6h_IxN.HLA-E	0.00365284	0.0635415	0.998	0.998	0	AM.7	R6h_IxN	HLA-E	FALSE	Resister_MtbINF.6h	Resister_MtbNEG.6h
AM.8.R6h_IxN.HLA-E	0.31755	-0.07672	0.989	0.964	0.025	AM.8	R6h_IxN	HLA-E	FALSE	Resister_MtbINF.6h	Resister_MtbNEG.6h
DC.9.R6h_IxN	0.807436	-0.00666392	0.885	0.86	0.025	DC.9	R6h_IxN	HLA-E	FALSE	Resister_MtbINF.6h	Resister_MtbNEG.6h
MoAM.4.R6h_IxN.HLA-E	0.513835	0.0111383	0.984	0.982	0.002	MoAM.4	R6h_IxN	HLA-E	FALSE	Resister_MtbINF.6h	Resister_MtbNEG.6h
L.0.INF24h_RxL.IFNG	0.0867515	0.11283	0.173	0.073	0.1	L.0	INF24h_RxL	IFNG	FALSE	Resister_MtbINF.24h	LTBI_MtbINF.24h
L.1.INF24h_RxL.IFNG	0.0973788	0.264073	0.118	0	0.118	L.1	INF24h_RxL	IFNG	FALSE	Resister_MtbINF.24h	LTBI_MtbINF.24h
L.14.INF24h_RxL.IFNG	0.388875	0.427004	0.176	0	0.176	L.14	INF24h_RxL	IFNG	FALSE	Resister_MtbINF.24h	LTBI_MtbINF.24h
L.15.INF24h_RxL.IFNG	0.273613	0.0574007	0.1	0.031	0.069	L.15	INF24h_RxL	IFNG	FALSE	Resister_MtbINF.24h	LTBI_MtbINF.24h
L.3.INF24h_RxL.IFNG	0.220162	0.012783	0.26	0.19	0.07	L.3	INF24h_RxL	IFNG	FALSE	Resister_MtbINF.24h	LTBI_MtbINF.24h
L.4.INF24h_RxL.IFNG	0.0463729	0.116525	0.215	0.112	0.103	L.4	INF24h_RxL	IFNG	TRUE	Resister_MtbINF.24h	LTBI_MtbINF.24h
L.7.INF24h_RxL.IFNG	0.602901	-0.218479	0.211	0.25	-0.039	L.7	INF24h_RxL	IFNG	FALSE	Resister_MtbINF.24h	LTBI_MtbINF.24h
L.8.INF24h_RxL.IFNG	0.99423	-0.133677	0.152	0.133	0.019	L.8	INF24h_RxL	IFNG	FALSE	Resister_MtbINF.24h	LTBI_MtbINF.24h
L.9.INF24h_RxL.IFNG	0.268766	-0.00510944	0.192	0.094	0.098	L.9	INF24h_RxL	IFNG	FALSE	Resister_MtbINF.24h	LTBI_MtbINF.24h
L.0.INF6h_RxL.IFNG	0.0297591	0.224073	0.143	0.036	0.107	L.0	INF6h_RxL	IFNG	TRUE	Resister_MtbINF.6h	LTBI_MtbINF.6h
L.1.INF6h_RxL.IFNG	0.362895	0.0725781	0.118	0.068	0.05	L.1	INF6h_RxL	IFNG	FALSE	Resister_MtbINF.6h	LTBI_MtbINF.6h
L.13.INF6h_RxL.IFNG	0.88268	0.00775593	0.16	0.146	0.014	L.13	INF6h_RxL	IFNG	FALSE	Resister_MtbINF.6h	LTBI_MtbINF.6h
L.14.INF6h_RxL.IFNG	0.0397118	0.378256	0.297	0.146	0.151	L.14	INF6h_RxL	IFNG	TRUE	Resister_MtbINF.6h	LTBI_MtbINF.6h
L.3.INF6h_RxL.IFNG	0.0137312	-0.334633	0.222	0.337	-0.115	L.3	INF6h_RxL	IFNG	TRUE	Resister_MtbINF.6h	LTBI_MtbINF.6h
L.4.INF6h_RxL.IFNG	0.00432775	0.156599	0.119	0.038	0.081	L.4	INF6h_RxL	IFNG	TRUE	Resister_MtbINF.6h	LTBI_MtbINF.6h
L.7.INF6h_RxL.IFNG	0.245173	0.397064	0.165	0	0.165	L.7	INF6h_RxL	IFNG	FALSE	Resister_MtbINF.6h	LTBI_MtbINF.6h
L.8.INF6h_RxL.IFNG	0.536039	0.120362	0.124	0.067	0.057	L.8	INF6h_RxL	IFNG	FALSE	Resister_MtbINF.6h	LTBI_MtbINF.6h
L.9.INF6h_RxL.IFNG	0.520659	0.0961901	0.159	0.095	0.064	L.9	INF6h_RxL	IFNG	FALSE	Resister_MtbINF.6h	LTBI_MtbINF.6h
L.14.L24h_IxN.IFNG	0.390537	-0.823291	0	0.222	-0.222	L.14	L24h_IxN	IFNG	FALSE	LTBI_MtbINF.24h	LTBI_MtbNEG.24h
L.3.L24h_IxN.IFNG	0.00682157	0.27663	0.19	0.083	0.107	L.3	L24h_IxN	IFNG	TRUE	LTBI_MtbINF.24h	LTBI_MtbNEG.24h
L.4.L24h_IxN.IFNG	0.201109	0.125213	0.112	0.064	0.048	L.4	L24h_IxN	IFNG	FALSE	LTBI_MtbINF.24h	LTBI_MtbNEG.24h
L.7.L24h_IxN.IFNG	0.170904	0.689284	0.25	0	0.25	L.7	L24h_IxN	IFNG	FALSE	LTBI_MtbINF.24h	LTBI_MtbNEG.24h
L.8.L24h_IxN.IFNG	0.948415	-0.0138729	0.133	0.148	-0.015	L.8	L24h_IxN	IFNG	FALSE	LTBI_MtbINF.24h	LTBI_MtbNEG.24h
L.13.L6h_IxN.IFNG	0.305115	0.137974	0.146	0.085	0.061	L.13	L6h_IxN	IFNG	FALSE	LTBI_MtbINF.6h	LTBI_MtbNEG.6h
L.14.L6h_IxN.IFNG	0.745204	0.0326382	0.146	0.124	0.022	L.14	L6h_IxN	IFNG	FALSE	LTBI_MtbINF.6h	LTBI_MtbNEG.6h
L.3.L6h_IxN.IFNG	0.0508055	0.279441	0.337	0.208	0.129	L.3	L6h_IxN	IFNG	TRUE	LTBI_MtbINF.6h	LTBI_MtbNEG.6h
L.4.L6h_IxN.IFNG	0.00160355	-0.210137	0.038	0.137	-0.099	L.4	L6h_IxN	IFNG	TRUE	LTBI_MtbINF.6h	LTBI_MtbNEG.6h
L.8.L6h_IxN.IFNG	0.287686	-0.320797	0.067	0.175	-0.108	L.8	L6h_IxN	IFNG	FALSE	LTBI_MtbINF.6h	LTBI_MtbNEG.6h
L.0.NEG24h_RxL.IFNG	0.0227916	0.140832	0.124	0.029	0.095	L.0	NEG24h_RxL	IFNG	TRUE	Resister_MtbNEG.24h	LTBI_MtbNEG.24h
L.1.NEG24h_RxL.IFNG	0.102731	0.121738	0.122	0.04	0.082	L.1	NEG24h_RxL	IFNG	FALSE	Resister_MtbNEG.24h	LTBI_MtbNEG.24h
L.14.NEG24h_RxL.IFNG	0.754759	-0.26084	0.212	0.222	-0.01	L.14	NEG24h_RxL	IFNG	FALSE	Resister_MtbNEG.24h	LTBI_MtbNEG.24h
L.3.NEG24h_RxL.IFNG	5.73707e-05	0.257528	0.244	0.083	0.161	L.3	NEG24h_RxL	IFNG	TRUE	Resister_MtbNEG.24h	LTBI_MtbNEG.24h
L.4.NEG24h_RxL.IFNG	0.0227708	0.109659	0.148	0.064	0.084	L.4	NEG24h_RxL	IFNG	TRUE	Resister_MtbNEG.24h	LTBI_MtbNEG.24h
L.7.NEG24h_RxL.IFNG	0.120453	0.575326	0.242	0	0.242	L.7	NEG24h_RxL	IFNG	FALSE	Resister_MtbNEG.24h	LTBI_MtbNEG.24h
L.8.NEG24h_RxL.IFNG	0.342253	-0.252155	0.1	0.148	-0.048	L.8	NEG24h_RxL	IFNG	FALSE	Resister_MtbNEG.24h	LTBI_MtbNEG.24h
L.0.NEG6h_RxL.IFNG	0.0776916	0.0967106	0.142	0.067	0.075	L.0	NEG6h_RxL	IFNG	FALSE	Resister_MtbNEG.6h	LTBI_MtbNEG.6h
L.1.NEG6h_RxL.IFNG	0.0302055	0.236634	0.131	0.021	0.11	L.1	NEG6h_RxL	IFNG	TRUE	Resister_MtbNEG.6h	LTBI_MtbNEG.6h
L.13.NEG6h_RxL.IFNG	0.361564	0.0680635	0.135	0.085	0.05	L.13	NEG6h_RxL	IFNG	FALSE	Resister_MtbNEG.6h	LTBI_MtbNEG.6h
L.14.NEG6h_RxL.IFNG	0.00346343	0.376146	0.282	0.124	0.158	L.14	NEG6h_RxL	IFNG	TRUE	Resister_MtbNEG.6h	LTBI_MtbNEG.6h
L.3.NEG6h_RxL.IFNG	0.728273	-0.0591409	0.252	0.208	0.044	L.3	NEG6h_RxL	IFNG	FALSE	Resister_MtbNEG.6h	LTBI_MtbNEG.6h
L.4.NEG6h_RxL.IFNG	0.644694	-0.0591429	0.132	0.137	-0.005	L.4	NEG6h_RxL	IFNG	FALSE	Resister_MtbNEG.6h	LTBI_MtbNEG.6h
L.7.NEG6h_RxL.IFNG	0.203142	0.277669	0.248	0.077	0.171	L.7	NEG6h_RxL	IFNG	FALSE	Resister_MtbNEG.6h	LTBI_MtbNEG.6h
L.8.NEG6h_RxL.IFNG	0.36306	-0.187711	0.138	0.175	-0.037	L.8	NEG6h_RxL	IFNG	FALSE	Resister_MtbNEG.6h	LTBI_MtbNEG.6h
L.9.NEG6h_RxL.IFNG	0.255317	0.134035	0.169	0.074	0.095	L.9	NEG6h_RxL	IFNG	FALSE	Resister_MtbNEG.6h	LTBI_MtbNEG.6h
L.0.R24h_IxN.IFNG	0.0253029	0.100396	0.173	0.124	0.049	L.0	R24h_IxN	IFNG	TRUE	Resister_MtbINF.24h	Resister_MtbNEG.24h
L.1.R24h_IxN.IFNG	0.932581	0.00553391	0.118	0.122	-0.004	L.1	R24h_IxN	IFNG	FALSE	Resister_MtbINF.24h	Resister_MtbNEG.24h
L.14.R24h_IxN.IFNG	0.598108	-0.135447	0.176	0.212	-0.036	L.14	R24h_IxN	IFNG	FALSE	Resister_MtbINF.24h	Resister_MtbNEG.24h
L.15.R24h_IxN.IFNG	0.109786	0.196291	0.1	0.021	0.079	L.15	R24h_IxN	IFNG	FALSE	Resister_MtbINF.24h	Resister_MtbNEG.24h
L.3.R24h_IxN.IFNG	0.79224	0.0318849	0.26	0.244	0.016	L.3	R24h_IxN	IFNG	FALSE	Resister_MtbINF.24h	Resister_MtbNEG.24h
L.4.R24h_IxN.IFNG	0.0139554	0.13208	0.215	0.148	0.067	L.4	R24h_IxN	IFNG	TRUE	Resister_MtbINF.24h	Resister_MtbNEG.24h
L.7.R24h_IxN.IFNG	0.515434	-0.104521	0.211	0.242	-0.031	L.7	R24h_IxN	IFNG	FALSE	Resister_MtbINF.24h	Resister_MtbNEG.24h
L.8.R24h_IxN.IFNG	0.178817	0.104605	0.152	0.1	0.052	L.8	R24h_IxN	IFNG	FALSE	Resister_MtbINF.24h	Resister_MtbNEG.24h
L.9.R24h_IxN.IFNG	0.000294013	0.346728	0.192	0.061	0.131	L.9	R24h_IxN	IFNG	TRUE	Resister_MtbINF.24h	Resister_MtbNEG.24h
L.0.R6h_IxN.IFNG	0.739105	0.0302414	0.143	0.142	0.001	L.0	R6h_IxN	IFNG	FALSE	Resister_MtbINF.6h	Resister_MtbNEG.6h
L.1.R6h_IxN.IFNG	0.633842	-0.00799507	0.118	0.131	-0.013	L.1	R6h_IxN	IFNG	FALSE	Resister_MtbINF.6h	Resister_MtbNEG.6h
L.13.R6h_IxN.IFNG	0.561801	0.0776666	0.16	0.135	0.025	L.13	R6h_IxN	IFNG	FALSE	Resister_MtbINF.6h	Resister_MtbNEG.6h
L.14.R6h_IxN.IFNG	0.713033	0.0347485	0.297	0.282	0.015	L.14	R6h_IxN	IFNG	FALSE	Resister_MtbINF.6h	Resister_MtbNEG.6h
L.3.R6h_IxN.IFNG	0.677435	0.00394875	0.222	0.252	-0.03	L.3	R6h_IxN	IFNG	FALSE	Resister_MtbINF.6h	Resister_MtbNEG.6h
L.4.R6h_IxN.IFNG	0.75202	0.00560437	0.119	0.132	-0.013	L.4	R6h_IxN	IFNG	FALSE	Resister_MtbINF.6h	Resister_MtbNEG.6h
L.7.R6h_IxN.IFNG	0.0348278	-0.119788	0.165	0.248	-0.083	L.7	R6h_IxN	IFNG	TRUE	Resister_MtbINF.6h	Resister_MtbNEG.6h
L.8.R6h_IxN.IFNG	0.775428	-0.012725	0.124	0.138	-0.014	L.8	R6h_IxN	IFNG	FALSE	Resister_MtbINF.6h	Resister_MtbNEG.6h
L.9.R6h_IxN.IFNG	0.975536	0.0222958	0.159	0.169	-0.01	L.9	R6h_IxN	IFNG	FALSE	Resister_MtbINF.6h	Resister_MtbNEG.6h
L.8.INF24h_RxL.KLRC1	0.848112	-0.0608588	0.261	0.267	-0.006	L.8	INF24h_RxL	KLRC1	FALSE	Resister_MtbINF.24h	LTBI_MtbINF.24h
L.8.INF6h_RxL.KLRC1	0.954826	-0.00714062	0.281	0.267	0.014	L.8	INF6h_RxL	KLRC1	FALSE	Resister_MtbINF.6h	LTBI_MtbINF.6h
L.8.L24h_IxN.KLRC1	0.136738	0.388944	0.267	0.074	0.193	L.8	L24h_IxN	KLRC1	FALSE	LTBI_MtbINF.24h	LTBI_MtbNEG.24h
L.8.L6h_IxN.KLRC1	0.859034	0.0323664	0.267	0.225	0.042	L.8	L6h_IxN	KLRC1	FALSE	LTBI_MtbINF.6h	LTBI_MtbNEG.6h
L.8.NEG24h_RxL.KLRC1	0.00236183	0.621999	0.406	0.074	0.332	L.8	NEG24h_RxL	KLRC1	TRUE	Resister_MtbNEG.24h	LTBI_MtbNEG.24h
L.8.NEG6h_RxL.KLRC1	0.297682	0.112826	0.353	0.225	0.128	L.8	NEG6h_RxL	KLRC1	FALSE	Resister_MtbNEG.6h	LTBI_MtbNEG.6h
L.8.R24h_IxN.KLRC1	0.0111797	-0.293914	0.261	0.406	-0.145	L.8	R24h_IxN	KLRC1	TRUE	Resister_MtbINF.24h	Resister_MtbNEG.24h
L.8.R6h_IxN.KLRC1	0.177678	-0.0876001	0.281	0.353	-0.072	L.8	R6h_IxN	KLRC1	FALSE	Resister_MtbINF.6h	Resister_MtbNEG.6h
L.8.INF24h_RxL.KLRC2	1	0.0258217	0.543	0.4	0.143	L.8	INF24h_RxL	KLRC2	FALSE	Resister_MtbINF.24h	LTBI_MtbINF.24h
L.8.INF6h_RxL.KLRC2	0.60033	0.115522	0.42	0.4	0.02	L.8	INF6h_RxL	KLRC2	FALSE	Resister_MtbINF.6h	LTBI_MtbINF.6h
L.8.L24h_IxN.KLRC2	0.118438	0.457614	0.4	0.185	0.215	L.8	L24h_IxN	KLRC2	FALSE	LTBI_MtbINF.24h	LTBI_MtbNEG.24h
L.8.L6h_IxN.KLRC2	0.501982	0.178028	0.4	0.25	0.15	L.8	L6h_IxN	KLRC2	FALSE	LTBI_MtbINF.6h	LTBI_MtbNEG.6h
L.8.NEG24h_RxL.KLRC2	0.000784974	0.642102	0.606	0.185	0.421	L.8	NEG24h_RxL	KLRC2	TRUE	Resister_MtbNEG.24h	LTBI_MtbNEG.24h
L.8.NEG6h_RxL.KLRC2	0.011146	0.376575	0.537	0.25	0.287	L.8	NEG6h_RxL	KLRC2	TRUE	Resister_MtbNEG.6h	LTBI_MtbNEG.6h
L.8.R24h_IxN.KLRC2	0.0982558	-0.158667	0.543	0.606	-0.063	L.8	R24h_IxN	KLRC2	FALSE	Resister_MtbINF.24h	Resister_MtbNEG.24h
L.8.R6h_IxN.KLRC2	0.263764	-0.0830252	0.42	0.537	-0.117	L.8	R6h_IxN	KLRC2	FALSE	Resister_MtbINF.6h	Resister_MtbNEG.6h
L.8.INF24h_RxL	0.0313574	0.162078	0.62	0.2	0.42	L.8	INF24h_RxL	KLRK1	TRUE	Resister_MtbINF.24h	LTBI_MtbINF.24h
L.8.INF6h_RxL	0.41545	0.203251	0.471	0.333	0.138	L.8	INF6h_RxL	KLRK1	FALSE	Resister_MtbINF.6h	LTBI_MtbINF.6h
L.8.L24h_IxN	0.30746	-0.415852	0.2	0.333	-0.133	L.8	L24h_IxN	KLRK1	FALSE	LTBI_MtbINF.24h	LTBI_MtbNEG.24h
L.8.L6h_IxN	0.780663	-0.47464	0.333	0.35	-0.017	L.8	L6h_IxN	KLRK1	FALSE	LTBI_MtbINF.6h	LTBI_MtbNEG.6h
L.8.NEG24h_RxL	0.0754562	0.121895	0.712	0.333	0.379	L.8	NEG24h_RxL	KLRK1	FALSE	Resister_MtbNEG.24h	LTBI_MtbNEG.24h
L.8.NEG6h_RxL	0.041524	-0.0420327	0.651	0.35	0.301	L.8	NEG6h_RxL	KLRK1	FALSE	Resister_MtbNEG.6h	LTBI_MtbNEG.6h
L.8.R24h_IxN	0.0191711	-0.37567	0.62	0.712	-0.092	L.8	R24h_IxN	KLRK1	TRUE	Resister_MtbINF.24h	Resister_MtbNEG.24h
L.8.R6h_IxN	0.00582563	-0.229356	0.471	0.651	-0.18	L.8	R6h_IxN	KLRK1	TRUE	Resister_MtbINF.6h	Resister_MtbNEG.6h
AM.0.INF24h_RxL.MICA	1.966e-17	0.0569124	0.344	0.264	0.08	AM.0	INF24h_RxL	MICA	FALSE	Resister_MtbINF.24h	LTBI_MtbINF.24h
AM.1.INF24h_RxL.MICA	2.09857e-06	0.0205601	0.323	0.257	0.066	AM.1	INF24h_RxL	MICA	FALSE	Resister_MtbINF.24h	LTBI_MtbINF.24h
AM.10.INF24h_RxL.MICA	0.676964	0.118087	0.285	0.297	-0.012	AM.10	INF24h_RxL	MICA	FALSE	Resister_MtbINF.24h	LTBI_MtbINF.24h
AM.11.INF24h_RxL.MICA	0.924982	-0.0211006	0.222	0.234	-0.012	AM.11	INF24h_RxL	MICA	FALSE	Resister_MtbINF.24h	LTBI_MtbINF.24h
AM.2.INF24h_RxL.MICA	0.00531638	-0.00372195	0.302	0.254	0.048	AM.2	INF24h_RxL	MICA	FALSE	Resister_MtbINF.24h	LTBI_MtbINF.24h
AM.3.INF24h_RxL.MICA	6.08321e-06	0.124399	0.347	0.234	0.113	AM.3	INF24h_RxL	MICA	TRUE	Resister_MtbINF.24h	LTBI_MtbINF.24h
AM.5.INF24h_RxL.MICA	1.19682e-06	0.0771614	0.337	0.252	0.085	AM.5	INF24h_RxL	MICA	FALSE	Resister_MtbINF.24h	LTBI_MtbINF.24h
AM.6.INF24h_RxL.MICA	0.0147764	0.032819	0.321	0.266	0.055	AM.6	INF24h_RxL	MICA	FALSE	Resister_MtbINF.24h	LTBI_MtbINF.24h
AM.7.INF24h_RxL.MICA	2.10861e-06	0.0379851	0.338	0.265	0.073	AM.7	INF24h_RxL	MICA	FALSE	Resister_MtbINF.24h	LTBI_MtbINF.24h
AM.8.INF24h_RxL.MICA	0.0419826	0.028487	0.351	0.309	0.042	AM.8	INF24h_RxL	MICA	FALSE	Resister_MtbINF.24h	LTBI_MtbINF.24h
MoAM.4.INF24h_RxL.MICA	0.00104467	0.0211999	0.285	0.229	0.056	MoAM.4	INF24h_RxL	MICA	FALSE	Resister_MtbINF.24h	LTBI_MtbINF.24h
AM.0.INF6h_RxL.MICA	0.74837	-0.00795027	0.301	0.298	0.003	AM.0	INF6h_RxL	MICA	FALSE	Resister_MtbINF.6h	LTBI_MtbINF.6h
AM.1.INF6h_RxL.MICA	0.0272717	-0.0197266	0.259	0.279	-0.02	AM.1	INF6h_RxL	MICA	FALSE	Resister_MtbINF.6h	LTBI_MtbINF.6h
AM.10.INF6h_RxL.MICA	0.788507	-0.00150141	0.264	0.248	0.016	AM.10	INF6h_RxL	MICA	FALSE	Resister_MtbINF.6h	LTBI_MtbINF.6h
AM.11.INF6h_RxL.MICA	0.00815296	-0.0754579	0.239	0.416	-0.177	AM.11	INF6h_RxL	MICA	FALSE	Resister_MtbINF.6h	LTBI_MtbINF.6h
AM.2.INF6h_RxL.MICA	0.0222239	-0.0258824	0.24	0.262	-0.022	AM.2	INF6h_RxL	MICA	FALSE	Resister_MtbINF.6h	LTBI_MtbINF.6h
AM.3.INF6h_RxL.MICA	0.495208	-0.0140645	0.188	0.188	0	AM.3	INF6h_RxL	MICA	FALSE	Resister_MtbINF.6h	LTBI_MtbINF.6h
AM.5.INF6h_RxL.MICA	0.979612	-0.00687812	0.26	0.255	0.005	AM.5	INF6h_RxL	MICA	FALSE	Resister_MtbINF.6h	LTBI_MtbINF.6h
AM.6.INF6h_RxL.MICA	0.35695	-0.0235302	0.28	0.29	-0.01	AM.6	INF6h_RxL	MICA	FALSE	Resister_MtbINF.6h	LTBI_MtbINF.6h
AM.7.INF6h_RxL.MICA	0.106499	-0.0277712	0.273	0.295	-0.022	AM.7	INF6h_RxL	MICA	FALSE	Resister_MtbINF.6h	LTBI_MtbINF.6h
AM.8.INF6h_RxL.MICA	0.954739	-0.0116984	0.195	0.2	-0.005	AM.8	INF6h_RxL	MICA	FALSE	Resister_MtbINF.6h	LTBI_MtbINF.6h
DC.9.INF6h_RxL.MICA	0.343045	-0.0202505	0.082	0.107	-0.025	DC.9	INF6h_RxL	MICA	FALSE	Resister_MtbINF.6h	LTBI_MtbINF.6h
MoAM.4.INF6h_RxL.MICA	0.00915516	-0.0359863	0.198	0.239	-0.041	MoAM.4	INF6h_RxL	MICA	FALSE	Resister_MtbINF.6h	LTBI_MtbINF.6h
AM.0.L24h_IxN.MICA	0.405493	-0.0171114	0.264	0.25	0.014	AM.0	L24h_IxN	MICA	FALSE	LTBI_MtbINF.24h	LTBI_MtbNEG.24h
AM.1.L24h_IxN.MICA	0.00343167	0.00303629	0.257	0.227	0.03	AM.1	L24h_IxN	MICA	FALSE	LTBI_MtbINF.24h	LTBI_MtbNEG.24h
AM.10.L24h_IxN.MICA	0.222998	0.0329716	0.297	0.243	0.054	AM.10	L24h_IxN	MICA	FALSE	LTBI_MtbINF.24h	LTBI_MtbNEG.24h
AM.11.L24h_IxN.MICA	0.876782	-0.0465954	0.234	0.223	0.011	AM.11	L24h_IxN	MICA	FALSE	LTBI_MtbINF.24h	LTBI_MtbNEG.24h
AM.2.L24h_IxN.MICA	0.396936	-0.0172551	0.254	0.255	-0.001	AM.2	L24h_IxN	MICA	FALSE	LTBI_MtbINF.24h	LTBI_MtbNEG.24h
AM.3.L24h_IxN.MICA	0.00140708	0.0574351	0.234	0.156	0.078	AM.3	L24h_IxN	MICA	FALSE	LTBI_MtbINF.24h	LTBI_MtbNEG.24h
AM.5.L24h_IxN.MICA	0.00477641	0.0465934	0.252	0.224	0.028	AM.5	L24h_IxN	MICA	FALSE	LTBI_MtbINF.24h	LTBI_MtbNEG.24h
AM.6.L24h_IxN.MICA	0.315261	-0.0138509	0.266	0.24	0.026	AM.6	L24h_IxN	MICA	FALSE	LTBI_MtbINF.24h	LTBI_MtbNEG.24h
AM.7.L24h_IxN.MICA	0.528007	-0.0143557	0.265	0.245	0.02	AM.7	L24h_IxN	MICA	FALSE	LTBI_MtbINF.24h	LTBI_MtbNEG.24h
AM.8.L24h_IxN.MICA	0.220535	-0.00186498	0.309	0.282	0.027	AM.8	L24h_IxN	MICA	FALSE	LTBI_MtbINF.24h	LTBI_MtbNEG.24h
MoAM.4.L24h_IxN.MICA	0.894742	-0.00934613	0.229	0.226	0.003	MoAM.4	L24h_IxN	MICA	FALSE	LTBI_MtbINF.24h	LTBI_MtbNEG.24h
AM.0.L6h_IxN.MICA	1.32037e-05	0.00938979	0.298	0.26	0.038	AM.0	L6h_IxN	MICA	FALSE	LTBI_MtbINF.6h	LTBI_MtbNEG.6h
AM.1.L6h_IxN.MICA	0.0285171	0.0108585	0.279	0.255	0.024	AM.1	L6h_IxN	MICA	FALSE	LTBI_MtbINF.6h	LTBI_MtbNEG.6h
AM.10.L6h_IxN.MICA	0.0499803	0.061699	0.248	0.181	0.067	AM.10	L6h_IxN	MICA	FALSE	LTBI_MtbINF.6h	LTBI_MtbNEG.6h
AM.11.L6h_IxN.MICA	0.103775	0.0269907	0.416	0.317	0.099	AM.11	L6h_IxN	MICA	FALSE	LTBI_MtbINF.6h	LTBI_MtbNEG.6h
AM.2.L6h_IxN.MICA	0.0259545	-0.00103416	0.262	0.233	0.029	AM.2	L6h_IxN	MICA	FALSE	LTBI_MtbINF.6h	LTBI_MtbNEG.6h
AM.3.L6h_IxN.MICA	0.00172444	0.0096878	0.188	0.166	0.022	AM.3	L6h_IxN	MICA	FALSE	LTBI_MtbINF.6h	LTBI_MtbNEG.6h
AM.5.L6h_IxN.MICA	1.84734e-05	0.0319676	0.255	0.199	0.056	AM.5	L6h_IxN	MICA	FALSE	LTBI_MtbINF.6h	LTBI_MtbNEG.6h
AM.6.L6h_IxN.MICA	0.186311	0.0150851	0.29	0.27	0.02	AM.6	L6h_IxN	MICA	FALSE	LTBI_MtbINF.6h	LTBI_MtbNEG.6h
AM.7.L6h_IxN.MICA	0.419303	0.0161199	0.295	0.282	0.013	AM.7	L6h_IxN	MICA	FALSE	LTBI_MtbINF.6h	LTBI_MtbNEG.6h
AM.8.L6h_IxN.MICA	0.817149	0.00640699	0.2	0.204	-0.004	AM.8	L6h_IxN	MICA	FALSE	LTBI_MtbINF.6h	LTBI_MtbNEG.6h
DC.9.L6h_IxN.MICA	0.140998	0.0392043	0.107	0.071	0.036	DC.9	L6h_IxN	MICA	FALSE	LTBI_MtbINF.6h	LTBI_MtbNEG.6h
MoAM.4.L6h_IxN.MICA	3.13332e-08	0.0454848	0.239	0.169	0.07	MoAM.4	L6h_IxN	MICA	FALSE	LTBI_MtbINF.6h	LTBI_MtbNEG.6h
AM.0.NEG24h_RxL.MICA	9.29144e-19	0.0303509	0.334	0.25	0.084	AM.0	NEG24h_RxL	MICA	FALSE	Resister_MtbNEG.24h	LTBI_MtbNEG.24h
AM.1.NEG24h_RxL.MICA	1.3069e-18	0.0284077	0.323	0.227	0.096	AM.1	NEG24h_RxL	MICA	FALSE	Resister_MtbNEG.24h	LTBI_MtbNEG.24h
AM.10.NEG24h_RxL.MICA	0.00403181	0.107402	0.366	0.243	0.123	AM.10	NEG24h_RxL	MICA	TRUE	Resister_MtbNEG.24h	LTBI_MtbNEG.24h
AM.11.NEG24h_RxL.MICA	0.270659	0.0721864	0.309	0.223	0.086	AM.11	NEG24h_RxL	MICA	FALSE	Resister_MtbNEG.24h	LTBI_MtbNEG.24h
AM.2.NEG24h_RxL.MICA	0.000162566	-0.00248528	0.315	0.255	0.06	AM.2	NEG24h_RxL	MICA	FALSE	Resister_MtbNEG.24h	LTBI_MtbNEG.24h
AM.3.NEG24h_RxL.MICA	4.3868e-07	0.109475	0.318	0.156	0.162	AM.3	NEG24h_RxL	MICA	TRUE	Resister_MtbNEG.24h	LTBI_MtbNEG.24h
AM.5.NEG24h_RxL.MICA	2.42505e-07	0.0948836	0.317	0.224	0.093	AM.5	NEG24h_RxL	MICA	FALSE	Resister_MtbNEG.24h	LTBI_MtbNEG.24h
AM.6.NEG24h_RxL.MICA	5.46377e-05	0.0152086	0.332	0.24	0.092	AM.6	NEG24h_RxL	MICA	FALSE	Resister_MtbNEG.24h	LTBI_MtbNEG.24h
AM.7.NEG24h_RxL.MICA	0.00182636	0.0143119	0.358	0.245	0.113	AM.7	NEG24h_RxL	MICA	FALSE	Resister_MtbNEG.24h	LTBI_MtbNEG.24h
AM.8.NEG24h_RxL.MICA	2.7766e-09	0.0373422	0.407	0.282	0.125	AM.8	NEG24h_RxL	MICA	FALSE	Resister_MtbNEG.24h	LTBI_MtbNEG.24h
MoAM.4.NEG24h_RxL.MICA	3.99887e-05	0.012187	0.294	0.226	0.068	MoAM.4	NEG24h_RxL	MICA	FALSE	Resister_MtbNEG.24h	LTBI_MtbNEG.24h
AM.0.NEG6h_RxL.MICA	0.092534	-0.0132512	0.293	0.26	0.033	AM.0	NEG6h_RxL	MICA	FALSE	Resister_MtbNEG.6h	LTBI_MtbNEG.6h
AM.1.NEG6h_RxL.MICA	0.427583	-0.018683	0.26	0.255	0.005	AM.1	NEG6h_RxL	MICA	FALSE	Resister_MtbNEG.6h	LTBI_MtbNEG.6h
AM.10.NEG6h_RxL.MICA	0.0987092	0.0106977	0.261	0.181	0.08	AM.10	NEG6h_RxL	MICA	FALSE	Resister_MtbNEG.6h	LTBI_MtbNEG.6h
AM.11.NEG6h_RxL.MICA	0.699109	-0.0333471	0.311	0.317	-0.006	AM.11	NEG6h_RxL	MICA	FALSE	Resister_MtbNEG.6h	LTBI_MtbNEG.6h
AM.2.NEG6h_RxL.MICA	0.913392	-0.0238327	0.246	0.233	0.013	AM.2	NEG6h_RxL	MICA	FALSE	Resister_MtbNEG.6h	LTBI_MtbNEG.6h
AM.3.NEG6h_RxL.MICA	0.000269721	-0.00753232	0.204	0.166	0.038	AM.3	NEG6h_RxL	MICA	FALSE	Resister_MtbNEG.6h	LTBI_MtbNEG.6h
AM.5.NEG6h_RxL.MICA	6.73311e-06	0.0190522	0.273	0.199	0.074	AM.5	NEG6h_RxL	MICA	FALSE	Resister_MtbNEG.6h	LTBI_MtbNEG.6h
AM.6.NEG6h_RxL.MICA	0.0778106	-0.00131282	0.322	0.27	0.052	AM.6	NEG6h_RxL	MICA	FALSE	Resister_MtbNEG.6h	LTBI_MtbNEG.6h
AM.7.NEG6h_RxL.MICA	0.962941	0.0133519	0.284	0.282	0.002	AM.7	NEG6h_RxL	MICA	FALSE	Resister_MtbNEG.6h	LTBI_MtbNEG.6h
AM.8.NEG6h_RxL.MICA	0.692399	-0.0351412	0.197	0.204	-0.007	AM.8	NEG6h_RxL	MICA	FALSE	Resister_MtbNEG.6h	LTBI_MtbNEG.6h
MoAM.4.NEG6h_RxL.MICA	0.00868137	0.0166363	0.21	0.169	0.041	MoAM.4	NEG6h_RxL	MICA	FALSE	Resister_MtbNEG.6h	LTBI_MtbNEG.6h
AM.0.R24h_IxN.MICA	0.0881686	0.00945006	0.344	0.334	0.01	AM.0	R24h_IxN	MICA	FALSE	Resister_MtbINF.24h	Resister_MtbNEG.24h
AM.1.R24h_IxN.MICA	0.875117	-0.00481128	0.323	0.323	0	AM.1	R24h_IxN	MICA	FALSE	Resister_MtbINF.24h	Resister_MtbNEG.24h
AM.10.R24h_IxN.MICA	0.29955	0.0436569	0.285	0.366	-0.081	AM.10	R24h_IxN	MICA	FALSE	Resister_MtbINF.24h	Resister_MtbNEG.24h
AM.11.R24h_IxN.MICA	0.284093	-0.139882	0.222	0.309	-0.087	AM.11	R24h_IxN	MICA	FALSE	Resister_MtbINF.24h	Resister_MtbNEG.24h
AM.2.R24h_IxN.MICA	0.350149	-0.0184918	0.302	0.315	-0.013	AM.2	R24h_IxN	MICA	FALSE	Resister_MtbINF.24h	Resister_MtbNEG.24h
AM.3.R24h_IxN.MICA	0.224056	0.0723588	0.347	0.318	0.029	AM.3	R24h_IxN	MICA	FALSE	Resister_MtbINF.24h	Resister_MtbNEG.24h
AM.5.R24h_IxN.MICA	0.365731	0.0288712	0.337	0.317	0.02	AM.5	R24h_IxN	MICA	FALSE	Resister_MtbINF.24h	Resister_MtbNEG.24h
AM.6.R24h_IxN.MICA	0.736318	0.0037595	0.321	0.332	-0.011	AM.6	R24h_IxN	MICA	FALSE	Resister_MtbINF.24h	Resister_MtbNEG.24h
AM.7.R24h_IxN.MICA	0.761551	0.00931748	0.338	0.358	-0.02	AM.7	R24h_IxN	MICA	FALSE	Resister_MtbINF.24h	Resister_MtbNEG.24h
AM.8.R24h_IxN.MICA	0.100927	-0.0107201	0.351	0.407	-0.056	AM.8	R24h_IxN	MICA	FALSE	Resister_MtbINF.24h	Resister_MtbNEG.24h
MoAM.4.R24h_IxN.MICA	0.652414	-0.000333179	0.285	0.294	-0.009	MoAM.4	R24h_IxN	MICA	FALSE	Resister_MtbINF.24h	Resister_MtbNEG.24h
AM.0.R6h_IxN.MICA	0.100641	0.0146907	0.301	0.293	0.008	AM.0	R6h_IxN	MICA	FALSE	Resister_MtbINF.6h	Resister_MtbNEG.6h
AM.1.R6h_IxN.MICA	0.665357	0.00981491	0.259	0.26	-0.001	AM.1	R6h_IxN	MICA	FALSE	Resister_MtbINF.6h	Resister_MtbNEG.6h
AM.10.R6h_IxN.MICA	0.50593	0.0494999	0.264	0.261	0.003	AM.10	R6h_IxN	MICA	FALSE	Resister_MtbINF.6h	Resister_MtbNEG.6h
AM.11.R6h_IxN.MICA	0.39126	-0.0151201	0.239	0.311	-0.072	AM.11	R6h_IxN	MICA	FALSE	Resister_MtbINF.6h	Resister_MtbNEG.6h
AM.2.R6h_IxN.MICA	0.830468	-0.00308388	0.24	0.246	-0.006	AM.2	R6h_IxN	MICA	FALSE	Resister_MtbINF.6h	Resister_MtbNEG.6h
AM.3.R6h_IxN.MICA	0.228294	0.00315565	0.188	0.204	-0.016	AM.3	R6h_IxN	MICA	FALSE	Resister_MtbINF.6h	Resister_MtbNEG.6h
AM.5.R6h_IxN.MICA	0.798167	0.00603726	0.26	0.273	-0.013	AM.5	R6h_IxN	MICA	FALSE	Resister_MtbINF.6h	Resister_MtbNEG.6h
AM.6.R6h_IxN.MICA	0.191851	-0.0071323	0.28	0.322	-0.042	AM.6	R6h_IxN	MICA	FALSE	Resister_MtbINF.6h	Resister_MtbNEG.6h
AM.7.R6h_IxN.MICA	0.523085	-0.0250031	0.273	0.284	-0.011	AM.7	R6h_IxN	MICA	FALSE	Resister_MtbINF.6h	Resister_MtbNEG.6h
AM.8.R6h_IxN.MICA	0.826201	0.0298498	0.195	0.197	-0.002	AM.8	R6h_IxN	MICA	FALSE	Resister_MtbINF.6h	Resister_MtbNEG.6h
MoAM.4.R6h_IxN.MICA	0.506151	-0.00713786	0.198	0.21	-0.012	MoAM.4	R6h_IxN	MICA	FALSE	Resister_MtbINF.6h	Resister_MtbNEG.6h
AM.0.INF24h_RxL.MICB	0.00143446	-0.0265155	0.174	0.195	-0.021	AM.0	INF24h_RxL	MICB	FALSE	Resister_MtbINF.24h	LTBI_MtbINF.24h
AM.1.INF24h_RxL.MICB	0.054689	-0.0266936	0.24	0.252	-0.012	AM.1	INF24h_RxL	MICB	FALSE	Resister_MtbINF.24h	LTBI_MtbINF.24h
AM.10.INF24h_RxL.MICB	2.5742e-05	-0.0902073	0.086	0.27	-0.184	AM.10	INF24h_RxL	MICB	FALSE	Resister_MtbINF.24h	LTBI_MtbINF.24h
AM.11.INF24h_RxL.MICB	0.135861	-0.112117	0.222	0.375	-0.153	AM.11	INF24h_RxL	MICB	FALSE	Resister_MtbINF.24h	LTBI_MtbINF.24h
AM.2.INF24h_RxL.MICB	0.000137834	-0.0421429	0.19	0.226	-0.036	AM.2	INF24h_RxL	MICB	FALSE	Resister_MtbINF.24h	LTBI_MtbINF.24h
AM.3.INF24h_RxL.MICB	0.178628	-0.023662	0.188	0.222	-0.034	AM.3	INF24h_RxL	MICB	FALSE	Resister_MtbINF.24h	LTBI_MtbINF.24h
AM.5.INF24h_RxL.MICB	2.07159e-05	-0.0494109	0.168	0.225	-0.057	AM.5	INF24h_RxL	MICB	FALSE	Resister_MtbINF.24h	LTBI_MtbINF.24h
AM.6.INF24h_RxL.MICB	0.194078	-0.0253261	0.149	0.167	-0.018	AM.6	INF24h_RxL	MICB	FALSE	Resister_MtbINF.24h	LTBI_MtbINF.24h
AM.7.INF24h_RxL.MICB	0.226381	-0.00182735	0.292	0.268	0.024	AM.7	INF24h_RxL	MICB	FALSE	Resister_MtbINF.24h	LTBI_MtbINF.24h
AM.8.INF24h_RxL.MICB	0.00325665	-0.034804	0.166	0.213	-0.047	AM.8	INF24h_RxL	MICB	FALSE	Resister_MtbINF.24h	LTBI_MtbINF.24h
MoAM.4.INF24h_RxL.MICB	0.361771	-0.0155523	0.212	0.222	-0.01	MoAM.4	INF24h_RxL	MICB	FALSE	Resister_MtbINF.24h	LTBI_MtbINF.24h
AM.1.INF6h_RxL.MICB	0.551514	0.00700645	0.133	0.127	0.006	AM.1	INF6h_RxL	MICB	FALSE	Resister_MtbINF.6h	LTBI_MtbINF.6h
AM.11.INF6h_RxL.MICB	0.818889	0.0321249	0.222	0.227	-0.005	AM.11	INF6h_RxL	MICB	FALSE	Resister_MtbINF.6h	LTBI_MtbINF.6h
AM.2.INF6h_RxL.MICB	0.448853	-0.00744987	0.12	0.126	-0.006	AM.2	INF6h_RxL	MICB	FALSE	Resister_MtbINF.6h	LTBI_MtbINF.6h
AM.3.INF6h_RxL.MICB	0.293043	-0.00805213	0.114	0.119	-0.005	AM.3	INF6h_RxL	MICB	FALSE	Resister_MtbINF.6h	LTBI_MtbINF.6h
AM.5.INF6h_RxL.MICB	0.425583	-0.00760392	0.105	0.114	-0.009	AM.5	INF6h_RxL	MICB	FALSE	Resister_MtbINF.6h	LTBI_MtbINF.6h
AM.6.INF6h_RxL.MICB	0.0185231	-0.016334	0.091	0.118	-0.027	AM.6	INF6h_RxL	MICB	FALSE	Resister_MtbINF.6h	LTBI_MtbINF.6h
AM.7.INF6h_RxL.MICB	0.393279	-0.00359672	0.17	0.186	-0.016	AM.7	INF6h_RxL	MICB	FALSE	Resister_MtbINF.6h	LTBI_MtbINF.6h
MoAM.4.INF6h_RxL.MICB	0.0145254	-0.0243405	0.102	0.133	-0.031	MoAM.4	INF6h_RxL	MICB	FALSE	Resister_MtbINF.6h	LTBI_MtbINF.6h
AM.0.L24h_IxN.MICB	1.5563e-46	0.05516	0.195	0.118	0.077	AM.0	L24h_IxN	MICB	FALSE	LTBI_MtbINF.24h	LTBI_MtbNEG.24h
AM.1.L24h_IxN.MICB	1.36121e-29	0.0543018	0.252	0.168	0.084	AM.1	L24h_IxN	MICB	FALSE	LTBI_MtbINF.24h	LTBI_MtbNEG.24h
AM.10.L24h_IxN.MICB	0.000334094	0.109102	0.27	0.154	0.116	AM.10	L24h_IxN	MICB	TRUE	LTBI_MtbINF.24h	LTBI_MtbNEG.24h
AM.11.L24h_IxN.MICB	0.0422383	0.0982456	0.375	0.232	0.143	AM.11	L24h_IxN	MICB	FALSE	LTBI_MtbINF.24h	LTBI_MtbNEG.24h
AM.2.L24h_IxN.MICB	4.80787e-20	0.047405	0.226	0.153	0.073	AM.2	L24h_IxN	MICB	FALSE	LTBI_MtbINF.24h	LTBI_MtbNEG.24h
AM.3.L24h_IxN.MICB	7.18779e-05	0.0560763	0.222	0.128	0.094	AM.3	L24h_IxN	MICB	FALSE	LTBI_MtbINF.24h	LTBI_MtbNEG.24h
AM.5.L24h_IxN.MICB	4.64436e-10	0.0671122	0.225	0.156	0.069	AM.5	L24h_IxN	MICB	FALSE	LTBI_MtbINF.24h	LTBI_MtbNEG.24h
AM.6.L24h_IxN.MICB	1.88348e-07	0.0365409	0.167	0.109	0.058	AM.6	L24h_IxN	MICB	FALSE	LTBI_MtbINF.24h	LTBI_MtbNEG.24h
AM.7.L24h_IxN.MICB	8.19578e-07	0.0617843	0.268	0.17	0.098	AM.7	L24h_IxN	MICB	FALSE	LTBI_MtbINF.24h	LTBI_MtbNEG.24h
AM.8.L24h_IxN.MICB	1.07005e-09	0.0633207	0.213	0.145	0.068	AM.8	L24h_IxN	MICB	FALSE	LTBI_MtbINF.24h	LTBI_MtbNEG.24h
MoAM.4.L24h_IxN.MICB	1.88438e-07	0.046408	0.222	0.164	0.058	MoAM.4	L24h_IxN	MICB	FALSE	LTBI_MtbINF.24h	LTBI_MtbNEG.24h
AM.1.L6h_IxN.MICB	0.39254	-0.00312063	0.127	0.12	0.007	AM.1	L6h_IxN	MICB	FALSE	LTBI_MtbINF.6h	LTBI_MtbNEG.6h
AM.11.L6h_IxN.MICB	0.0748399	-0.0989681	0.227	0.288	-0.061	AM.11	L6h_IxN	MICB	FALSE	LTBI_MtbINF.6h	LTBI_MtbNEG.6h
AM.2.L6h_IxN.MICB	5.60025e-05	0.0121582	0.126	0.096	0.03	AM.2	L6h_IxN	MICB	FALSE	LTBI_MtbINF.6h	LTBI_MtbNEG.6h
AM.3.L6h_IxN.MICB	0.386955	-0.0160322	0.119	0.122	-0.003	AM.3	L6h_IxN	MICB	FALSE	LTBI_MtbINF.6h	LTBI_MtbNEG.6h
AM.5.L6h_IxN.MICB	0.0930132	0.00252751	0.114	0.097	0.017	AM.5	L6h_IxN	MICB	FALSE	LTBI_MtbINF.6h	LTBI_MtbNEG.6h
AM.6.L6h_IxN.MICB	0.00628121	0.00926821	0.118	0.09	0.028	AM.6	L6h_IxN	MICB	FALSE	LTBI_MtbINF.6h	LTBI_MtbNEG.6h
AM.7.L6h_IxN.MICB	0.332568	0.00256864	0.186	0.169	0.017	AM.7	L6h_IxN	MICB	FALSE	LTBI_MtbINF.6h	LTBI_MtbNEG.6h
AM.8.L6h_IxN.MICB	0.332148	-0.034682	0.082	0.105	-0.023	AM.8	L6h_IxN	MICB	FALSE	LTBI_MtbINF.6h	LTBI_MtbNEG.6h
MoAM.4.L6h_IxN.MICB	7.54796e-05	0.015518	0.133	0.094	0.039	MoAM.4	L6h_IxN	MICB	FALSE	LTBI_MtbINF.6h	LTBI_MtbNEG.6h
AM.0.NEG24h_RxL.MICB	0.030954	-0.00132399	0.133	0.118	0.015	AM.0	NEG24h_RxL	MICB	FALSE	Resister_MtbNEG.24h	LTBI_MtbNEG.24h
AM.1.NEG24h_RxL.MICB	0.000645505	0.00361348	0.201	0.168	0.033	AM.1	NEG24h_RxL	MICB	FALSE	Resister_MtbNEG.24h	LTBI_MtbNEG.24h
AM.10.NEG24h_RxL.MICB	0.754144	0.00796112	0.141	0.154	-0.013	AM.10	NEG24h_RxL	MICB	FALSE	Resister_MtbNEG.24h	LTBI_MtbNEG.24h
AM.11.NEG24h_RxL.MICB	0.832454	-0.0471762	0.255	0.232	0.023	AM.11	NEG24h_RxL	MICB	FALSE	Resister_MtbNEG.24h	LTBI_MtbNEG.24h
AM.2.NEG24h_RxL.MICB	0.0181458	-0.00150893	0.179	0.153	0.026	AM.2	NEG24h_RxL	MICB	FALSE	Resister_MtbNEG.24h	LTBI_MtbNEG.24h
AM.3.NEG24h_RxL.MICB	0.0836566	0.0108229	0.182	0.128	0.054	AM.3	NEG24h_RxL	MICB	FALSE	Resister_MtbNEG.24h	LTBI_MtbNEG.24h
AM.5.NEG24h_RxL.MICB	0.219278	0.0176336	0.177	0.156	0.021	AM.5	NEG24h_RxL	MICB	FALSE	Resister_MtbNEG.24h	LTBI_MtbNEG.24h
AM.6.NEG24h_RxL.MICB	0.0696779	0.00106626	0.135	0.109	0.026	AM.6	NEG24h_RxL	MICB	FALSE	Resister_MtbNEG.24h	LTBI_MtbNEG.24h
AM.7.NEG24h_RxL.MICB	0.130482	-0.00535026	0.219	0.17	0.049	AM.7	NEG24h_RxL	MICB	FALSE	Resister_MtbNEG.24h	LTBI_MtbNEG.24h
AM.8.NEG24h_RxL.MICB	0.0522106	0.014343	0.17	0.145	0.025	AM.8	NEG24h_RxL	MICB	FALSE	Resister_MtbNEG.24h	LTBI_MtbNEG.24h
MoAM.4.NEG24h_RxL.MICB	0.0486233	0.00101907	0.192	0.164	0.028	MoAM.4	NEG24h_RxL	MICB	FALSE	Resister_MtbNEG.24h	LTBI_MtbNEG.24h
AM.0.NEG6h_RxL.MICB	0.00101511	0.00304986	0.103	0.083	0.02	AM.0	NEG6h_RxL	MICB	FALSE	Resister_MtbNEG.6h	LTBI_MtbNEG.6h
AM.1.NEG6h_RxL.MICB	0.321104	-0.00591777	0.132	0.12	0.012	AM.1	NEG6h_RxL	MICB	FALSE	Resister_MtbNEG.6h	LTBI_MtbNEG.6h
AM.11.NEG6h_RxL.MICB	0.0417842	-0.114382	0.189	0.288	-0.099	AM.11	NEG6h_RxL	MICB	TRUE	Resister_MtbNEG.6h	LTBI_MtbNEG.6h
AM.2.NEG6h_RxL.MICB	0.0206031	0.00907144	0.118	0.096	0.022	AM.2	NEG6h_RxL	MICB	FALSE	Resister_MtbNEG.6h	LTBI_MtbNEG.6h
AM.3.NEG6h_RxL.MICB	0.977047	-0.0206253	0.127	0.122	0.005	AM.3	NEG6h_RxL	MICB	FALSE	Resister_MtbNEG.6h	LTBI_MtbNEG.6h
AM.5.NEG6h_RxL.MICB	0.00772949	0.004891	0.127	0.097	0.03	AM.5	NEG6h_RxL	MICB	FALSE	Resister_MtbNEG.6h	LTBI_MtbNEG.6h
AM.6.NEG6h_RxL.MICB	0.0894662	-0.008251	0.113	0.09	0.023	AM.6	NEG6h_RxL	MICB	FALSE	Resister_MtbNEG.6h	LTBI_MtbNEG.6h
AM.7.NEG6h_RxL.MICB	0.747537	-0.0107281	0.168	0.169	-0.001	AM.7	NEG6h_RxL	MICB	FALSE	Resister_MtbNEG.6h	LTBI_MtbNEG.6h
AM.8.NEG6h_RxL.MICB	0.0545759	-0.0663994	0.051	0.105	-0.054	AM.8	NEG6h_RxL	MICB	FALSE	Resister_MtbNEG.6h	LTBI_MtbNEG.6h
MoAM.4.NEG6h_RxL.MICB	0.0609858	0.000409713	0.117	0.094	0.023	MoAM.4	NEG6h_RxL	MICB	FALSE	Resister_MtbNEG.6h	LTBI_MtbNEG.6h
AM.0.R24h_IxN.MICB	1.39893e-08	0.0299685	0.174	0.133	0.041	AM.0	R24h_IxN	MICB	FALSE	Resister_MtbINF.24h	Resister_MtbNEG.24h
AM.1.R24h_IxN.MICB	0.000205023	0.0239947	0.24	0.201	0.039	AM.1	R24h_IxN	MICB	FALSE	Resister_MtbINF.24h	Resister_MtbNEG.24h
AM.10.R24h_IxN.MICB	0.158382	0.0109338	0.086	0.141	-0.055	AM.10	R24h_IxN	MICB	FALSE	Resister_MtbINF.24h	Resister_MtbNEG.24h
AM.11.R24h_IxN.MICB	0.728587	0.0333053	0.222	0.255	-0.033	AM.11	R24h_IxN	MICB	FALSE	Resister_MtbINF.24h	Resister_MtbNEG.24h
AM.2.R24h_IxN.MICB	0.29508	0.00677108	0.19	0.179	0.011	AM.2	R24h_IxN	MICB	FALSE	Resister_MtbINF.24h	Resister_MtbNEG.24h
AM.3.R24h_IxN.MICB	0.618643	0.0215914	0.188	0.182	0.006	AM.3	R24h_IxN	MICB	FALSE	Resister_MtbINF.24h	Resister_MtbNEG.24h
AM.5.R24h_IxN.MICB	0.679299	6.77001e-05	0.168	0.177	-0.009	AM.5	R24h_IxN	MICB	FALSE	Resister_MtbINF.24h	Resister_MtbNEG.24h
AM.6.R24h_IxN.MICB	0.447585	0.0101486	0.149	0.135	0.014	AM.6	R24h_IxN	MICB	FALSE	Resister_MtbINF.24h	Resister_MtbNEG.24h
AM.7.R24h_IxN.MICB	0.00045846	0.0653073	0.292	0.219	0.073	AM.7	R24h_IxN	MICB	FALSE	Resister_MtbINF.24h	Resister_MtbNEG.24h
AM.8.R24h_IxN.MICB	0.962	0.0141736	0.166	0.17	-0.004	AM.8	R24h_IxN	MICB	FALSE	Resister_MtbINF.24h	Resister_MtbNEG.24h
MoAM.4.R24h_IxN.MICB	0.0895266	0.0298366	0.212	0.192	0.02	MoAM.4	R24h_IxN	MICB	FALSE	Resister_MtbINF.24h	Resister_MtbNEG.24h
AM.0.R6h_IxN.MICB	0.512269	0.00149727	0.097	0.103	-0.006	AM.0	R6h_IxN	MICB	FALSE	Resister_MtbINF.6h	Resister_MtbNEG.6h
AM.1.R6h_IxN.MICB	0.752467	0.00980359	0.133	0.132	0.001	AM.1	R6h_IxN	MICB	FALSE	Resister_MtbINF.6h	Resister_MtbNEG.6h
AM.11.R6h_IxN.MICB	0.459605	0.0475386	0.222	0.189	0.033	AM.11	R6h_IxN	MICB	FALSE	Resister_MtbINF.6h	Resister_MtbNEG.6h
AM.2.R6h_IxN.MICB	0.933946	-0.00436307	0.12	0.118	0.002	AM.2	R6h_IxN	MICB	FALSE	Resister_MtbINF.6h	Resister_MtbNEG.6h
AM.3.R6h_IxN.MICB	0.095574	-0.00345898	0.114	0.127	-0.013	AM.3	R6h_IxN	MICB	FALSE	Resister_MtbINF.6h	Resister_MtbNEG.6h
AM.5.R6h_IxN.MICB	0.099054	-0.00996741	0.105	0.127	-0.022	AM.5	R6h_IxN	MICB	FALSE	Resister_MtbINF.6h	Resister_MtbNEG.6h
AM.6.R6h_IxN.MICB	0.127722	0.00118516	0.091	0.113	-0.022	AM.6	R6h_IxN	MICB	FALSE	Resister_MtbINF.6h	Resister_MtbNEG.6h
AM.7.R6h_IxN.MICB	0.722104	0.00970005	0.17	0.168	0.002	AM.7	R6h_IxN	MICB	FALSE	Resister_MtbINF.6h	Resister_MtbNEG.6h
MoAM.4.R6h_IxN.MICB	0.322531	-0.00923221	0.102	0.117	-0.015	MoAM.4	R6h_IxN	MICB	FALSE	Resister_MtbINF.6h	Resister_MtbNEG.6h
L.8.INF24h_RxL.PRF1	0.465949	-0.111035	0.565	0.467	0.098	L.8	INF24h_RxL	PRF1	FALSE	Resister_MtbINF.24h	LTBI_MtbINF.24h
L.8.INF6h_RxL.PRF1	0.332126	-0.20879	0.248	0.333	-0.085	L.8	INF6h_RxL	PRF1	FALSE	Resister_MtbINF.6h	LTBI_MtbINF.6h
L.8.L24h_IxN.PRF1	0.257113	0.334253	0.467	0.296	0.171	L.8	L24h_IxN	PRF1	FALSE	LTBI_MtbINF.24h	LTBI_MtbNEG.24h
L.8.L6h_IxN.PRF1	0.214152	0.335846	0.333	0.175	0.158	L.8	L6h_IxN	PRF1	FALSE	LTBI_MtbINF.6h	LTBI_MtbNEG.6h
L.8.NEG24h_RxL.PRF1	0.410313	-0.253223	0.294	0.296	-0.002	L.8	NEG24h_RxL	PRF1	FALSE	Resister_MtbNEG.24h	LTBI_MtbNEG.24h
L.8.NEG6h_RxL.PRF1	0.431038	0.0793887	0.261	0.175	0.086	L.8	NEG6h_RxL	PRF1	FALSE	Resister_MtbNEG.6h	LTBI_MtbNEG.6h
L.8.R24h_IxN.PRF1	2.777e-07	0.476441	0.565	0.294	0.271	L.8	R24h_IxN	PRF1	TRUE	Resister_MtbINF.24h	Resister_MtbNEG.24h
L.8.R6h_IxN.PRF1	0.671564	0.0476675	0.248	0.261	-0.013	L.8	R6h_IxN	PRF1	FALSE	Resister_MtbINF.6h	Resister_MtbNEG.6h
AM.0.INF24h_RxL	7.69732e-14	0.0554936	0.306	0.245	0.061	AM.0	INF24h_RxL	TNF	FALSE	Resister_MtbINF.24h	LTBI_MtbINF.24h
AM.1.INF24h_RxL	2.75557e-06	0.0325023	0.295	0.242	0.053	AM.1	INF24h_RxL	TNF	FALSE	Resister_MtbINF.24h	LTBI_MtbINF.24h
AM.10.INF24h_RxL	0.00287706	-0.121656	0.291	0.448	-0.157	AM.10	INF24h_RxL	TNF	TRUE	Resister_MtbINF.24h	LTBI_MtbINF.24h
AM.11.INF24h_RxL	0.161493	0.0687447	0.481	0.309	0.172	AM.11	INF24h_RxL	TNF	FALSE	Resister_MtbINF.24h	LTBI_MtbINF.24h
AM.2.INF24h_RxL	6.80316e-07	0.0436342	0.445	0.366	0.079	AM.2	INF24h_RxL	TNF	FALSE	Resister_MtbINF.24h	LTBI_MtbINF.24h
AM.3.INF24h_RxL	1.37087e-11	0.273008	0.667	0.5	0.167	AM.3	INF24h_RxL	TNF	TRUE	Resister_MtbINF.24h	LTBI_MtbINF.24h
AM.5.INF24h_RxL	0.220446	-0.0392282	0.302	0.308	-0.006	AM.5	INF24h_RxL	TNF	FALSE	Resister_MtbINF.24h	LTBI_MtbINF.24h
AM.6.INF24h_RxL	0.0232339	0.0231036	0.279	0.235	0.044	AM.6	INF24h_RxL	TNF	FALSE	Resister_MtbINF.24h	LTBI_MtbINF.24h
AM.7.INF24h_RxL	7.95727e-08	0.0617029	0.471	0.383	0.088	AM.7	INF24h_RxL	TNF	FALSE	Resister_MtbINF.24h	LTBI_MtbINF.24h
AM.8.INF24h_RxL	0.00151695	0.119572	0.397	0.357	0.04	AM.8	INF24h_RxL	TNF	TRUE	Resister_MtbINF.24h	LTBI_MtbINF.24h
DC.9.INF24h_RxL	0.0106007	0.0929802	0.116	0.051	0.065	DC.9	INF24h_RxL	TNF	FALSE	Resister_MtbINF.24h	LTBI_MtbINF.24h
L.1.INF24h_RxL.TNF	0.000261217	-0.584895	0.049	0.238	-0.189	L.1	INF24h_RxL	TNF	TRUE	Resister_MtbINF.24h	LTBI_MtbINF.24h
L.13.INF24h_RxL.TNF	0.452224	0.147641	0.164	0.095	0.069	L.13	INF24h_RxL	TNF	FALSE	Resister_MtbINF.24h	LTBI_MtbINF.24h
L.14.INF24h_RxL.TNF	0.503114	0.37614	0.118	0	0.118	L.14	INF24h_RxL	TNF	FALSE	Resister_MtbINF.24h	LTBI_MtbINF.24h
L.15.INF24h_RxL.TNF	0.12596	-0.352542	0.08	0.188	-0.108	L.15	INF24h_RxL	TNF	FALSE	Resister_MtbINF.24h	LTBI_MtbINF.24h
L.16.INF24h_RxL	0.760257	-0.10234	0.143	0.158	-0.015	L.16	INF24h_RxL	TNF	FALSE	Resister_MtbINF.24h	LTBI_MtbINF.24h
L.3.INF24h_RxL.TNF	0.2301	-0.115856	0.24	0.278	-0.038	L.3	INF24h_RxL	TNF	FALSE	Resister_MtbINF.24h	LTBI_MtbINF.24h
L.7.INF24h_RxL.TNF	0.809361	-0.113262	0.105	0.125	-0.02	L.7	INF24h_RxL	TNF	FALSE	Resister_MtbINF.24h	LTBI_MtbINF.24h
L.8.INF24h_RxL.TNF	0.301593	-0.44554	0.065	0.133	-0.068	L.8	INF24h_RxL	TNF	FALSE	Resister_MtbINF.24h	LTBI_MtbINF.24h
L.9.INF24h_RxL.TNF	0.581316	-0.214861	0.138	0.156	-0.018	L.9	INF24h_RxL	TNF	FALSE	Resister_MtbINF.24h	LTBI_MtbINF.24h
MoAM.4.INF24h_RxL	4.09313e-08	0.0981293	0.391	0.312	0.079	MoAM.4	INF24h_RxL	TNF	FALSE	Resister_MtbINF.24h	LTBI_MtbINF.24h
AM.0.INF6h_RxL	1.88433e-47	0.168367	0.543	0.441	0.102	AM.0	INF6h_RxL	TNF	TRUE	Resister_MtbINF.6h	LTBI_MtbINF.6h
AM.1.INF6h_RxL	1.1959e-09	0.0788314	0.461	0.393	0.068	AM.1	INF6h_RxL	TNF	FALSE	Resister_MtbINF.6h	LTBI_MtbINF.6h
AM.10.INF6h_RxL	0.0740303	0.0603722	0.439	0.361	0.078	AM.10	INF6h_RxL	TNF	FALSE	Resister_MtbINF.6h	LTBI_MtbINF.6h
AM.11.INF6h_RxL	0.00467785	0.274531	0.581	0.452	0.129	AM.11	INF6h_RxL	TNF	TRUE	Resister_MtbINF.6h	LTBI_MtbINF.6h
AM.2.INF6h_RxL	5.40933e-20	0.179057	0.693	0.605	0.088	AM.2	INF6h_RxL	TNF	TRUE	Resister_MtbINF.6h	LTBI_MtbINF.6h
AM.3.INF6h_RxL	6.56617e-122	0.27568	0.81	0.663	0.147	AM.3	INF6h_RxL	TNF	TRUE	Resister_MtbINF.6h	LTBI_MtbINF.6h
AM.5.INF6h_RxL	1.53368e-20	0.153079	0.515	0.367	0.148	AM.5	INF6h_RxL	TNF	TRUE	Resister_MtbINF.6h	LTBI_MtbINF.6h
AM.6.INF6h_RxL	0.00204779	0.0476543	0.5	0.439	0.061	AM.6	INF6h_RxL	TNF	FALSE	Resister_MtbINF.6h	LTBI_MtbINF.6h
AM.7.INF6h_RxL	0.107196	0.032165	0.624	0.6	0.024	AM.7	INF6h_RxL	TNF	FALSE	Resister_MtbINF.6h	LTBI_MtbINF.6h
AM.8.INF6h_RxL	0.0636302	0.1565	0.425	0.345	0.08	AM.8	INF6h_RxL	TNF	FALSE	Resister_MtbINF.6h	LTBI_MtbINF.6h
DC.9.INF6h_RxL	0.26565	0.0897092	0.286	0.26	0.026	DC.9	INF6h_RxL	TNF	FALSE	Resister_MtbINF.6h	LTBI_MtbINF.6h
L.13.INF6h_RxL.TNF	0.00192975	-0.369555	0.145	0.366	-0.221	L.13	INF6h_RxL	TNF	TRUE	Resister_MtbINF.6h	LTBI_MtbINF.6h
L.14.INF6h_RxL.TNF	0.492253	0.0760099	0.198	0.146	0.052	L.14	INF6h_RxL	TNF	FALSE	Resister_MtbINF.6h	LTBI_MtbINF.6h
L.15.INF6h_RxL.TNF	0.671882	0.0571246	0.119	0.096	0.023	L.15	INF6h_RxL	TNF	FALSE	Resister_MtbINF.6h	LTBI_MtbINF.6h
L.3.INF6h_RxL.TNF	0.747577	-0.0982596	0.226	0.225	0.001	L.3	INF6h_RxL	TNF	FALSE	Resister_MtbINF.6h	LTBI_MtbINF.6h
L.4.INF6h_RxL.TNF	0.78549	0.00167369	0.106	0.096	0.01	L.4	INF6h_RxL	TNF	FALSE	Resister_MtbINF.6h	LTBI_MtbINF.6h
L.6.INF6h_RxL	0.198742	-0.145601	0.109	0.152	-0.043	L.6	INF6h_RxL	TNF	FALSE	Resister_MtbINF.6h	LTBI_MtbINF.6h
L.7.INF6h_RxL.TNF	0.692385	-0.111981	0.104	0.143	-0.039	L.7	INF6h_RxL	TNF	FALSE	Resister_MtbINF.6h	LTBI_MtbINF.6h
MoAM.4.INF6h_RxL	7.78079e-07	0.149603	0.517	0.443	0.074	MoAM.4	INF6h_RxL	TNF	TRUE	Resister_MtbINF.6h	LTBI_MtbINF.6h
AM.0.L24h_IxN	7.50962e-187	0.137802	0.245	0.1	0.145	AM.0	L24h_IxN	TNF	TRUE	LTBI_MtbINF.24h	LTBI_MtbNEG.24h
AM.1.L24h_IxN	5.35678e-110	0.0996257	0.242	0.102	0.14	AM.1	L24h_IxN	TNF	FALSE	LTBI_MtbINF.24h	LTBI_MtbNEG.24h
AM.10.L24h_IxN	3.95705e-23	0.368595	0.448	0.088	0.36	AM.10	L24h_IxN	TNF	TRUE	LTBI_MtbINF.24h	LTBI_MtbNEG.24h
AM.11.L24h_IxN	0.425169	0.0303223	0.309	0.264	0.045	AM.11	L24h_IxN	TNF	FALSE	LTBI_MtbINF.24h	LTBI_MtbNEG.24h
AM.2.L24h_IxN	3.37088e-169	0.290031	0.366	0.148	0.218	AM.2	L24h_IxN	TNF	TRUE	LTBI_MtbINF.24h	LTBI_MtbNEG.24h
AM.3.L24h_IxN	1.29789e-20	0.417681	0.5	0.28	0.22	AM.3	L24h_IxN	TNF	TRUE	LTBI_MtbINF.24h	LTBI_MtbNEG.24h
AM.5.L24h_IxN	1.49238e-56	0.203987	0.308	0.124	0.184	AM.5	L24h_IxN	TNF	TRUE	LTBI_MtbINF.24h	LTBI_MtbNEG.24h
AM.6.L24h_IxN	2.74378e-44	0.116407	0.235	0.088	0.147	AM.6	L24h_IxN	TNF	TRUE	LTBI_MtbINF.24h	LTBI_MtbNEG.24h
AM.7.L24h_IxN	1.75227e-35	0.254013	0.383	0.147	0.236	AM.7	L24h_IxN	TNF	TRUE	LTBI_MtbINF.24h	LTBI_MtbNEG.24h
AM.8.L24h_IxN	1.28858e-47	0.188623	0.357	0.182	0.175	AM.8	L24h_IxN	TNF	TRUE	LTBI_MtbINF.24h	LTBI_MtbNEG.24h
L.0.L24h_IxN.TNF	0.360455	-0.0991995	0.055	0.1	-0.045	L.0	L24h_IxN	TNF	FALSE	LTBI_MtbINF.24h	LTBI_MtbNEG.24h
L.1.L24h_IxN	0.00278738	0.628461	0.238	0.02	0.218	L.1	L24h_IxN	TNF	TRUE	LTBI_MtbINF.24h	LTBI_MtbNEG.24h
L.13.L24h_IxN	0.744065	-0.0912987	0.095	0.12	-0.025	L.13	L24h_IxN	TNF	FALSE	LTBI_MtbINF.24h	LTBI_MtbNEG.24h
L.14.L24h_IxN.TNF	0.390537	-0.760911	0	0.222	-0.222	L.14	L24h_IxN	TNF	FALSE	LTBI_MtbINF.24h	LTBI_MtbNEG.24h
L.15.L24h_IxN	0.00726187	0.59184	0.188	0	0.188	L.15	L24h_IxN	TNF	TRUE	LTBI_MtbINF.24h	LTBI_MtbNEG.24h
L.16.L24h_IxN	0.911156	-0.0530555	0.158	0.167	-0.009	L.16	L24h_IxN	TNF	FALSE	LTBI_MtbINF.24h	LTBI_MtbNEG.24h
L.3.L24h_IxN.TNF	0.831307	0.00242442	0.278	0.256	0.022	L.3	L24h_IxN	TNF	FALSE	LTBI_MtbINF.24h	LTBI_MtbNEG.24h
L.7.L24h_IxN.TNF	0.381574	0.362587	0.125	0	0.125	L.7	L24h_IxN	TNF	FALSE	LTBI_MtbINF.24h	LTBI_MtbNEG.24h
L.8.L24h_IxN.TNF	0.486612	0.360947	0.133	0.074	0.059	L.8	L24h_IxN	TNF	FALSE	LTBI_MtbINF.24h	LTBI_MtbNEG.24h
L.9.L24h_IxN.TNF	0.179881	0.41097	0.156	0.061	0.095	L.9	L24h_IxN	TNF	FALSE	LTBI_MtbINF.24h	LTBI_MtbNEG.24h
MoAM.4.L24h_IxN	6.24076e-34	0.127389	0.312	0.183	0.129	MoAM.4	L24h_IxN	TNF	TRUE	LTBI_MtbINF.24h	LTBI_MtbNEG.24h
AM.0.L6h_IxN	0.00516938	-0.00787313	0.441	0.405	0.036	AM.0	L6h_IxN	TNF	FALSE	LTBI_MtbINF.6h	LTBI_MtbNEG.6h
AM.1.L6h_IxN	1.15434e-06	0.0368122	0.393	0.341	0.052	AM.1	L6h_IxN	TNF	FALSE	LTBI_MtbINF.6h	LTBI_MtbNEG.6h
AM.10.L6h_IxN	0.00252072	0.121161	0.361	0.259	0.102	AM.10	L6h_IxN	TNF	TRUE	LTBI_MtbINF.6h	LTBI_MtbNEG.6h
AM.11.L6h_IxN	0.0621221	-0.255379	0.452	0.49	-0.038	AM.11	L6h_IxN	TNF	FALSE	LTBI_MtbINF.6h	LTBI_MtbNEG.6h
AM.2.L6h_IxN	1.90512e-10	0.0455932	0.605	0.535	0.07	AM.2	L6h_IxN	TNF	FALSE	LTBI_MtbINF.6h	LTBI_MtbNEG.6h
AM.3.L6h_IxN	0.335201	-0.0322899	0.663	0.628	0.035	AM.3	L6h_IxN	TNF	FALSE	LTBI_MtbINF.6h	LTBI_MtbNEG.6h
AM.5.L6h_IxN	0.0802602	0.0183844	0.367	0.34	0.027	AM.5	L6h_IxN	TNF	FALSE	LTBI_MtbINF.6h	LTBI_MtbNEG.6h
AM.6.L6h_IxN	0.00326655	0.0229847	0.439	0.397	0.042	AM.6	L6h_IxN	TNF	FALSE	LTBI_MtbINF.6h	LTBI_MtbNEG.6h
AM.7.L6h_IxN	4.09063e-23	0.188055	0.6	0.438	0.162	AM.7	L6h_IxN	TNF	TRUE	LTBI_MtbINF.6h	LTBI_MtbNEG.6h
AM.8.L6h_IxN	0.200189	0.0402902	0.345	0.289	0.056	AM.8	L6h_IxN	TNF	FALSE	LTBI_MtbINF.6h	LTBI_MtbNEG.6h
DC.9.L6h_IxN	0.56184	-0.029056	0.26	0.279	-0.019	DC.9	L6h_IxN	TNF	FALSE	LTBI_MtbINF.6h	LTBI_MtbNEG.6h
L.0.L6h_IxN.TNF	0.225187	-0.17069	0.055	0.111	-0.056	L.0	L6h_IxN	TNF	FALSE	LTBI_MtbINF.6h	LTBI_MtbNEG.6h
L.13.L6h_IxN.TNF	0.0204436	0.330528	0.366	0.171	0.195	L.13	L6h_IxN	TNF	TRUE	LTBI_MtbINF.6h	LTBI_MtbNEG.6h
L.14.L6h_IxN.TNF	0.910309	0.00687488	0.146	0.135	0.011	L.14	L6h_IxN	TNF	FALSE	LTBI_MtbINF.6h	LTBI_MtbNEG.6h
L.16.L6h_IxN	0.87725	-0.043087	0.091	0.1	-0.009	L.16	L6h_IxN	TNF	FALSE	LTBI_MtbINF.6h	LTBI_MtbNEG.6h
L.3.L6h_IxN.TNF	0.553135	0.125014	0.225	0.2	0.025	L.3	L6h_IxN	TNF	FALSE	LTBI_MtbINF.6h	LTBI_MtbNEG.6h
L.6.L6h_IxN	0.293246	0.115353	0.152	0.107	0.045	L.6	L6h_IxN	TNF	FALSE	LTBI_MtbINF.6h	LTBI_MtbNEG.6h
L.7.L6h_IxN.TNF	0.570877	-0.380044	0.143	0.231	-0.088	L.7	L6h_IxN	TNF	FALSE	LTBI_MtbINF.6h	LTBI_MtbNEG.6h
MoAM.4.L6h_IxN	1.98426e-09	0.090579	0.443	0.352	0.091	MoAM.4	L6h_IxN	TNF	FALSE	LTBI_MtbINF.6h	LTBI_MtbNEG.6h
AM.0.NEG24h_RxL	8.14019e-25	0.032284	0.156	0.1	0.056	AM.0	NEG24h_RxL	TNF	FALSE	Resister_MtbNEG.24h	LTBI_MtbNEG.24h
AM.1.NEG24h_RxL	1.15088e-24	0.0284474	0.173	0.102	0.071	AM.1	NEG24h_RxL	TNF	FALSE	Resister_MtbNEG.24h	LTBI_MtbNEG.24h
AM.10.NEG24h_RxL	0.00159108	0.0756595	0.183	0.088	0.095	AM.10	NEG24h_RxL	TNF	FALSE	Resister_MtbNEG.24h	LTBI_MtbNEG.24h
AM.11.NEG24h_RxL	0.95882	-0.00461956	0.255	0.264	-0.009	AM.11	NEG24h_RxL	TNF	FALSE	Resister_MtbNEG.24h	LTBI_MtbNEG.24h
AM.2.NEG24h_RxL	6.36722e-17	0.0469063	0.224	0.148	0.076	AM.2	NEG24h_RxL	TNF	FALSE	Resister_MtbNEG.24h	LTBI_MtbNEG.24h
AM.3.NEG24h_RxL	9.11285e-07	0.161681	0.462	0.28	0.182	AM.3	NEG24h_RxL	TNF	TRUE	Resister_MtbNEG.24h	LTBI_MtbNEG.24h
AM.5.NEG24h_RxL	0.00525964	0.027112	0.166	0.124	0.042	AM.5	NEG24h_RxL	TNF	FALSE	Resister_MtbNEG.24h	LTBI_MtbNEG.24h
AM.6.NEG24h_RxL	2.97319e-05	0.0152262	0.14	0.088	0.052	AM.6	NEG24h_RxL	TNF	FALSE	Resister_MtbNEG.24h	LTBI_MtbNEG.24h
AM.7.NEG24h_RxL	5.78579e-06	0.0919505	0.256	0.147	0.109	AM.7	NEG24h_RxL	TNF	FALSE	Resister_MtbNEG.24h	LTBI_MtbNEG.24h
AM.8.NEG24h_RxL	4.00414e-10	0.0925021	0.268	0.182	0.086	AM.8	NEG24h_RxL	TNF	FALSE	Resister_MtbNEG.24h	LTBI_MtbNEG.24h
L.0.NEG24h_RxL.TNF	0.727328	-0.0275484	0.124	0.1	0.024	L.0	NEG24h_RxL	TNF	FALSE	Resister_MtbNEG.24h	LTBI_MtbNEG.24h
L.13.NEG24h_RxL.TNF	0.844488	-0.0526175	0.11	0.12	-0.01	L.13	NEG24h_RxL	TNF	FALSE	Resister_MtbNEG.24h	LTBI_MtbNEG.24h
L.14.NEG24h_RxL.TNF	0.544024	-0.367243	0.173	0.222	-0.049	L.14	NEG24h_RxL	TNF	FALSE	Resister_MtbNEG.24h	LTBI_MtbNEG.24h
L.16.NEG24h_RxL	0.0658191	-0.350662	0.031	0.167	-0.136	L.16	NEG24h_RxL	TNF	FALSE	Resister_MtbNEG.24h	LTBI_MtbNEG.24h
L.3.NEG24h_RxL.TNF	0.903453	-0.051061	0.28	0.256	0.024	L.3	NEG24h_RxL	TNF	FALSE	Resister_MtbNEG.24h	LTBI_MtbNEG.24h
L.4.NEG24h_RxL.TNF	0.138557	0.0539703	0.104	0.056	0.048	L.4	NEG24h_RxL	TNF	FALSE	Resister_MtbNEG.24h	LTBI_MtbNEG.24h
L.7.NEG24h_RxL.TNF	0.285386	0.307768	0.129	0	0.129	L.7	NEG24h_RxL	TNF	FALSE	Resister_MtbNEG.24h	LTBI_MtbNEG.24h
L.9.NEG24h_RxL.TNF	0.299184	0.139634	0.128	0.061	0.067	L.9	NEG24h_RxL	TNF	FALSE	Resister_MtbNEG.24h	LTBI_MtbNEG.24h
MoAM.4.NEG24h_RxL	6.77209e-12	0.0502925	0.27	0.183	0.087	MoAM.4	NEG24h_RxL	TNF	FALSE	Resister_MtbNEG.24h	LTBI_MtbNEG.24h
AM.0.NEG6h_RxL	0.000418542	0.00738549	0.455	0.405	0.05	AM.0	NEG6h_RxL	TNF	FALSE	Resister_MtbNEG.6h	LTBI_MtbNEG.6h
AM.1.NEG6h_RxL	0.990847	-0.0205147	0.361	0.341	0.02	AM.1	NEG6h_RxL	TNF	FALSE	Resister_MtbNEG.6h	LTBI_MtbNEG.6h
AM.10.NEG6h_RxL	0.0275541	0.0650597	0.353	0.259	0.094	AM.10	NEG6h_RxL	TNF	FALSE	Resister_MtbNEG.6h	LTBI_MtbNEG.6h
AM.11.NEG6h_RxL	0.54808	-0.0900706	0.511	0.49	0.021	AM.11	NEG6h_RxL	TNF	FALSE	Resister_MtbNEG.6h	LTBI_MtbNEG.6h
AM.2.NEG6h_RxL	0.138258	-0.0421114	0.532	0.535	-0.003	AM.2	NEG6h_RxL	TNF	FALSE	Resister_MtbNEG.6h	LTBI_MtbNEG.6h
AM.3.NEG6h_RxL	1.15767e-05	0.0180546	0.704	0.628	0.076	AM.3	NEG6h_RxL	TNF	FALSE	Resister_MtbNEG.6h	LTBI_MtbNEG.6h
AM.5.NEG6h_RxL	0.00360884	0.0114724	0.408	0.34	0.068	AM.5	NEG6h_RxL	TNF	FALSE	Resister_MtbNEG.6h	LTBI_MtbNEG.6h
AM.6.NEG6h_RxL	0.998618	-0.0520334	0.427	0.397	0.03	AM.6	NEG6h_RxL	TNF	FALSE	Resister_MtbNEG.6h	LTBI_MtbNEG.6h
AM.7.NEG6h_RxL	0.000352244	0.0720048	0.525	0.438	0.087	AM.7	NEG6h_RxL	TNF	FALSE	Resister_MtbNEG.6h	LTBI_MtbNEG.6h
AM.8.NEG6h_RxL	0.816305	-0.036838	0.285	0.289	-0.004	AM.8	NEG6h_RxL	TNF	FALSE	Resister_MtbNEG.6h	LTBI_MtbNEG.6h
DC.9.NEG6h_RxL	0.518361	0.0689539	0.297	0.279	0.018	DC.9	NEG6h_RxL	TNF	FALSE	Resister_MtbNEG.6h	LTBI_MtbNEG.6h
L.0.NEG6h_RxL.TNF	0.642066	-0.0305358	0.142	0.111	0.031	L.0	NEG6h_RxL	TNF	FALSE	Resister_MtbNEG.6h	LTBI_MtbNEG.6h
L.13.NEG6h_RxL.TNF	0.694945	-0.0202965	0.146	0.171	-0.025	L.13	NEG6h_RxL	TNF	FALSE	Resister_MtbNEG.6h	LTBI_MtbNEG.6h
L.14.NEG6h_RxL.TNF	0.521166	-0.00681402	0.181	0.135	0.046	L.14	NEG6h_RxL	TNF	FALSE	Resister_MtbNEG.6h	LTBI_MtbNEG.6h
L.15.NEG6h_RxL.TNF	0.574981	0.0909651	0.108	0.083	0.025	L.15	NEG6h_RxL	TNF	FALSE	Resister_MtbNEG.6h	LTBI_MtbNEG.6h
L.16.NEG6h_RxL	0.835333	-0.0504608	0.091	0.1	-0.009	L.16	NEG6h_RxL	TNF	FALSE	Resister_MtbNEG.6h	LTBI_MtbNEG.6h
L.17.NEG6h_RxL	0.824602	0.0203255	0.1	0.085	0.015	L.17	NEG6h_RxL	TNF	FALSE	Resister_MtbNEG.6h	LTBI_MtbNEG.6h
L.3.NEG6h_RxL.TNF	0.103447	0.118223	0.305	0.2	0.105	L.3	NEG6h_RxL	TNF	FALSE	Resister_MtbNEG.6h	LTBI_MtbNEG.6h
L.4.NEG6h_RxL.TNF	0.317922	0.0316513	0.11	0.081	0.029	L.4	NEG6h_RxL	TNF	FALSE	Resister_MtbNEG.6h	LTBI_MtbNEG.6h
L.5.NEG6h_RxL	0.411577	0.0331851	0.122	0.074	0.048	L.5	NEG6h_RxL	TNF	FALSE	Resister_MtbNEG.6h	LTBI_MtbNEG.6h
L.6.NEG6h_RxL	0.49603	-0.0885712	0.089	0.107	-0.018	L.6	NEG6h_RxL	TNF	FALSE	Resister_MtbNEG.6h	LTBI_MtbNEG.6h
L.7.NEG6h_RxL.TNF	0.176194	-0.453033	0.126	0.231	-0.105	L.7	NEG6h_RxL	TNF	FALSE	Resister_MtbNEG.6h	LTBI_MtbNEG.6h
L.9.NEG6h_RxL.TNF	0.182982	0.195428	0.129	0.037	0.092	L.9	NEG6h_RxL	TNF	FALSE	Resister_MtbNEG.6h	LTBI_MtbNEG.6h
MoAM.4.NEG6h_RxL	0.00104144	0.0361031	0.427	0.352	0.075	MoAM.4	NEG6h_RxL	TNF	FALSE	Resister_MtbNEG.6h	LTBI_MtbNEG.6h
AM.0.R24h_IxN	8.05738e-79	0.161011	0.306	0.156	0.15	AM.0	R24h_IxN	TNF	TRUE	Resister_MtbINF.24h	Resister_MtbNEG.24h
AM.1.R24h_IxN	8.80271e-33	0.103681	0.295	0.173	0.122	AM.1	R24h_IxN	TNF	TRUE	Resister_MtbINF.24h	Resister_MtbNEG.24h
AM.10.R24h_IxN	0.00511039	0.171279	0.291	0.183	0.108	AM.10	R24h_IxN	TNF	TRUE	Resister_MtbINF.24h	Resister_MtbNEG.24h
AM.11.R24h_IxN	0.0637663	0.103687	0.481	0.255	0.226	AM.11	R24h_IxN	TNF	FALSE	Resister_MtbINF.24h	Resister_MtbNEG.24h
AM.2.R24h_IxN	1.97647e-72	0.286759	0.445	0.224	0.221	AM.2	R24h_IxN	TNF	TRUE	Resister_MtbINF.24h	Resister_MtbNEG.24h
AM.3.R24h_IxN	5.12254e-16	0.529007	0.667	0.462	0.205	AM.3	R24h_IxN	TNF	TRUE	Resister_MtbINF.24h	Resister_MtbNEG.24h
AM.5.R24h_IxN	6.46189e-12	0.137646	0.302	0.166	0.136	AM.5	R24h_IxN	TNF	TRUE	Resister_MtbINF.24h	Resister_MtbNEG.24h
AM.6.R24h_IxN	9.40654e-14	0.124284	0.279	0.14	0.139	AM.6	R24h_IxN	TNF	TRUE	Resister_MtbINF.24h	Resister_MtbNEG.24h
AM.7.R24h_IxN	8.96183e-18	0.223765	0.471	0.256	0.215	AM.7	R24h_IxN	TNF	TRUE	Resister_MtbINF.24h	Resister_MtbNEG.24h
AM.8.R24h_IxN	8.27049e-16	0.215694	0.397	0.268	0.129	AM.8	R24h_IxN	TNF	TRUE	Resister_MtbINF.24h	Resister_MtbNEG.24h
DC.9.R24h_IxN	0.000820835	0.131071	0.116	0.035	0.081	DC.9	R24h_IxN	TNF	TRUE	Resister_MtbINF.24h	Resister_MtbNEG.24h
L.0.R24h_IxN.TNF	0.026769	-0.0782861	0.076	0.124	-0.048	L.0	R24h_IxN	TNF	FALSE	Resister_MtbINF.24h	Resister_MtbNEG.24h
L.13.R24h_IxN.TNF	0.329158	0.10896	0.164	0.11	0.054	L.13	R24h_IxN	TNF	FALSE	Resister_MtbINF.24h	Resister_MtbNEG.24h
L.14.R24h_IxN.TNF	0.565986	-0.0175284	0.118	0.173	-0.055	L.14	R24h_IxN	TNF	FALSE	Resister_MtbINF.24h	Resister_MtbNEG.24h
L.16.R24h_IxN	0.136543	0.195266	0.143	0.031	0.112	L.16	R24h_IxN	TNF	FALSE	Resister_MtbINF.24h	Resister_MtbNEG.24h
L.3.R24h_IxN.TNF	0.216372	-0.0623708	0.24	0.28	-0.04	L.3	R24h_IxN	TNF	FALSE	Resister_MtbINF.24h	Resister_MtbNEG.24h
L.4.R24h_IxN.TNF	0.704022	-0.0133911	0.095	0.104	-0.009	L.4	R24h_IxN	TNF	FALSE	Resister_MtbINF.24h	Resister_MtbNEG.24h
L.7.R24h_IxN.TNF	0.60338	-0.058443	0.105	0.129	-0.024	L.7	R24h_IxN	TNF	FALSE	Resister_MtbINF.24h	Resister_MtbNEG.24h
L.9.R24h_IxN.TNF	0.715062	0.0564743	0.138	0.128	0.01	L.9	R24h_IxN	TNF	FALSE	Resister_MtbINF.24h	Resister_MtbNEG.24h
MoAM.4.R24h_IxN	5.76035e-18	0.175226	0.391	0.27	0.121	MoAM.4	R24h_IxN	TNF	TRUE	Resister_MtbINF.24h	Resister_MtbNEG.24h
AM.0.R6h_IxN	5.91562e-28	0.153108	0.543	0.455	0.088	AM.0	R6h_IxN	TNF	TRUE	Resister_MtbINF.6h	Resister_MtbNEG.6h
AM.1.R6h_IxN	2.19729e-18	0.136158	0.461	0.361	0.1	AM.1	R6h_IxN	TNF	TRUE	Resister_MtbINF.6h	Resister_MtbNEG.6h
AM.10.R6h_IxN	0.0139078	0.116473	0.439	0.353	0.086	AM.10	R6h_IxN	TNF	TRUE	Resister_MtbINF.6h	Resister_MtbNEG.6h
AM.11.R6h_IxN	0.119944	0.109223	0.581	0.511	0.07	AM.11	R6h_IxN	TNF	FALSE	Resister_MtbINF.6h	Resister_MtbNEG.6h
AM.2.R6h_IxN	2.58845e-35	0.266762	0.693	0.532	0.161	AM.2	R6h_IxN	TNF	TRUE	Resister_MtbINF.6h	Resister_MtbNEG.6h
AM.3.R6h_IxN	3.41023e-64	0.225336	0.81	0.704	0.106	AM.3	R6h_IxN	TNF	TRUE	Resister_MtbINF.6h	Resister_MtbNEG.6h
AM.5.R6h_IxN	6.51998e-14	0.159991	0.515	0.408	0.107	AM.5	R6h_IxN	TNF	TRUE	Resister_MtbINF.6h	Resister_MtbNEG.6h
AM.6.R6h_IxN	1.42292e-07	0.122672	0.5	0.427	0.073	AM.6	R6h_IxN	TNF	TRUE	Resister_MtbINF.6h	Resister_MtbNEG.6h
AM.7.R6h_IxN	2.03468e-08	0.148215	0.624	0.525	0.099	AM.7	R6h_IxN	TNF	TRUE	Resister_MtbINF.6h	Resister_MtbNEG.6h
AM.8.R6h_IxN	0.00948184	0.233628	0.425	0.285	0.14	AM.8	R6h_IxN	TNF	TRUE	Resister_MtbINF.6h	Resister_MtbNEG.6h
DC.9.R6h_IxN	0.937475	-0.00830071	0.286	0.297	-0.011	DC.9	R6h_IxN	TNF	FALSE	Resister_MtbINF.6h	Resister_MtbNEG.6h
L.0.R6h_IxN.TNF	0.00198947	-0.0864714	0.084	0.142	-0.058	L.0	R6h_IxN	TNF	FALSE	Resister_MtbINF.6h	Resister_MtbNEG.6h
L.13.R6h_IxN.TNF	0.938282	-0.0187301	0.145	0.146	-0.001	L.13	R6h_IxN	TNF	FALSE	Resister_MtbINF.6h	Resister_MtbNEG.6h
L.14.R6h_IxN.TNF	0.487482	0.0896989	0.198	0.181	0.017	L.14	R6h_IxN	TNF	FALSE	Resister_MtbINF.6h	Resister_MtbNEG.6h
L.15.R6h_IxN.TNF	0.817998	0.0174199	0.119	0.108	0.011	L.15	R6h_IxN	TNF	FALSE	Resister_MtbINF.6h	Resister_MtbNEG.6h
L.17.R6h_IxN	0.569588	-0.0839741	0.071	0.1	-0.029	L.17	R6h_IxN	TNF	FALSE	Resister_MtbINF.6h	Resister_MtbNEG.6h
L.3.R6h_IxN.TNF	0.119568	-0.0914684	0.226	0.305	-0.079	L.3	R6h_IxN	TNF	FALSE	Resister_MtbINF.6h	Resister_MtbNEG.6h
L.4.R6h_IxN.TNF	0.924707	0.00219514	0.106	0.11	-0.004	L.4	R6h_IxN	TNF	FALSE	Resister_MtbINF.6h	Resister_MtbNEG.6h
L.5.R6h_IxN	0.311958	-0.0206089	0.092	0.122	-0.03	L.5	R6h_IxN	TNF	FALSE	Resister_MtbINF.6h	Resister_MtbNEG.6h
L.6.R6h_IxN	0.445153	0.058324	0.109	0.089	0.02	L.6	R6h_IxN	TNF	FALSE	Resister_MtbINF.6h	Resister_MtbNEG.6h
L.7.R6h_IxN.TNF	0.458744	-0.0389925	0.104	0.126	-0.022	L.7	R6h_IxN	TNF	FALSE	Resister_MtbINF.6h	Resister_MtbNEG.6h
L.9.R6h_IxN.TNF	0.241696	-0.0623916	0.097	0.129	-0.032	L.9	R6h_IxN	TNF	FALSE	Resister_MtbINF.6h	Resister_MtbNEG.6h
MoAM.4.R6h_IxN	1.77864e-08	0.204079	0.517	0.427	0.09	MoAM.4	R6h_IxN	TNF	TRUE	Resister_MtbINF.6h	Resister_MtbNEG.6h
a) ID (Cluster + contrast + gene) of the differential expression (DE) analysis.
b) P-value of the DE analysis from the single-cell data using Wilcoxon test. Threshold for DEG = P < 0.05.
c) Average log2 fold-change of the gene expression (from the single-cell matrix) between the two tested set of cells. Positive log2FC (shades of red) indicates higher expression and negative log2FC (shades of blue) indicates lower expression in the cells from group 1 compared to the cells from group 2 from the selected cluster. Threshold for DEG = absolute log2FC > 0.1.
d) Percent of cells from the selected cluster in group 1 that express the selected gene.
e) Percent of cells from the selected cluster in group 2 that express the selected gene.
f) Proportion difference (pct diff) between the positive cells in group 1 and group 2 (pct.1 - pct.2). Positive (shades of red) and negative values (shades of blue) indicate higher and lower proportion in pct.1 relative to pct.2, respectively.
g) Contrasts: "NEG6h_RxL" = Resister vs LTBI using non-infected cells from 6h (MtbNEG.6h), "NEG24h_RxL" = Resister vs LTBI using non-infected cells from 24h (MtbNEG.24h), "INF6h_RxL" = Resister vs LTBI using Mtb-infected cells 6h post-infection (MtbINF.6h), "INF24h_RxL" = Resister vs LTBI using Mtb-infected cells 24h post-infection (MtbINF.24h), "R6h_IxN" = Mtb-response at 6h in resister cells, "…
h) T/F indicating if the gene passed the thresholds for DEG in the specific cluster and contrast (Wilcoxon P < 0.05 and absolute log2FC > 0.1).
