# Supplementary material for: Mycobacterium tuberculosis resisters despite HIV exhibit activated T cells and macrophages in their pulmonary alveoli
Source: Research Square preprint supplement (doi:10.21203/rs.3.rs-3889020/v1), 2024-01-31
Supplement: Supplementary file 4 [file 99237a6b60e7fc2b330e8b15.xlsx]

## Sheet: Table S6
Supplementary Table 6. TF activity score based on DEG between AM/DC from resisters and LTBI in the absence of Mtb.
		LTBI			Resister
Cluster	TF	Z-scaled TF-score mean	SD	N cells *	Z-scaled TF-score mean	SD	N cells *	Mean Difference	t-test P value	FDR	PASS a
AM.0	AHR	-0.01256	1.00902	10844	0.0332601	0.975052	4095	-0.0458201	0.0111838	0.0141269	FALSE
AM.0	AP1	-0.0374721	0.991991	10844	0.09923	1.01436	4095	-0.136702	1.61021e-13	3.22041e-13	FALSE
AM.0	AR	0.0297573	1.01793	10844	-0.0788004	0.946493	4095	0.108558	9.61422e-10	1.47282e-09	FALSE
AM.0	ATF2	-0.055235	0.988426	10844	0.146268	1.01573	4095	-0.201503	1.98309e-27	8.92393e-27	TRUE
AM.0	ATF3	0.0421664	0.994162	10844	-0.111661	1.00693	4095	0.153828	7.5683e-17	2.01821e-16	FALSE
AM.0	ATF4	-0.0174365	0.951568	10844	0.0461737	1.11698	4095	-0.0636102	0.00125021	0.00163664	FALSE
AM.0	BCL6	0.0199858	1.0184	10844	-0.0529247	0.947651	4095	0.0729105	4.02424e-05	5.7949e-05	FALSE
AM.0	CEBPA	-0.0567624	1.00666	10844	0.150313	0.966292	4095	-0.207075	1.3307e-30	6.8436e-30	TRUE
AM.0	CEBPB	0.00397037	1.00237	10844	-0.010514	0.993742	4095	0.0144843	0.427934	0.466837	FALSE
AM.0	CEBPG	-0.118122	0.979157	10844	0.3128	0.987255	4095	-0.430923	3.77881e-121	2.72074e-119	TRUE
AM.0	CREB1	-0.0603143	1.0033	10844	0.159719	0.973436	4095	-0.220033	5.08626e-34	3.32919e-33	TRUE
AM.0	CTCF	0.0174746	1.01504	10844	-0.0462746	0.957608	4095	0.0637492	0.00035973	0.00047964	FALSE
AM.0	CTNNB1	-0.00216779	0.988955	10844	0.00574055	1.02878	4095	-0.00790835	0.671916	0.70113	FALSE
AM.0	CUX1	-0.0384953	1.02661	10844	0.10194	0.918196	4095	-0.140435	8.23775e-16	1.85349e-15	FALSE
AM.0	DDIT3	0.00125166	1.02884	10844	-0.00331452	0.919368	4095	0.00456618	0.793421	0.81609	FALSE
AM.0	E2F1	-0.0336311	1.00071	10844	0.0890588	0.992752	4095	-0.12269	1.91015e-11	3.35441e-11	FALSE
AM.0	E2F4	0.0684486	1.0364	10844	-0.181259	0.871005	4095	0.249708	5.03145e-49	4.02516e-48	TRUE
AM.0	EGR1	0.0383695	1.03598	10844	-0.101607	0.889942	4095	0.139976	3.08649e-16	7.40757e-16	FALSE
AM.0	ELF1	0.00552605	1.02538	10844	-0.0146336	0.929413	4095	0.0201596	0.250636	0.286441	FALSE
AM.0	ESR1	0.0136007	1.04671	10844	-0.0360161	0.863284	4095	0.0496168	0.00319348	0.0041059	FALSE
AM.0	ESR2	0.00632557	1.01444	10844	-0.0167508	0.960624	4095	0.0230764	0.19726	0.229076	FALSE
AM.0	ETS1	-0.0431251	1.01102	10844	0.1142	0.961043	4095	-0.157325	1.70559e-18	5.33924e-18	FALSE
AM.0	EZH2	-0.0536447	1.02366	10844	0.142057	0.919593	4095	-0.195702	4.23579e-29	2.03318e-28	FALSE
AM.0	FOS	-0.0242079	0.99535	10844	0.0641051	1.00953	4095	-0.0883129	1.71983e-06	2.5271e-06	FALSE
AM.0	FOXO1	0.044269	0.996852	10844	-0.117229	0.998977	4095	0.161498	1.4219e-18	4.85083e-18	FALSE
AM.0	FOXO3	-0.0116523	1.01892	10844	0.0308565	0.947505	4095	-0.0425088	0.0166345	0.0206497	FALSE
AM.0	GATA3	0.0307866	1.01076	10844	-0.0815262	0.966338	4095	0.112313	4.14698e-10	6.63516e-10	FALSE
AM.0	GFI1	0.0200068	1.01094	10844	-0.0529802	0.96855	4095	0.072987	4.9764e-05	7.02551e-05	FALSE
AM.0	GLI1	0.0404182	1.00838	10844	-0.107032	0.969467	4095	0.14745	2.78058e-16	6.9035e-16	FALSE
AM.0	HDAC1	0.0430988	1.01239	10844	-0.11413	0.957223	4095	0.157229	1.4822e-18	4.85083e-18	FALSE
AM.0	HES1	-0.00284839	1.01925	10844	0.00754285	0.947227	4095	-0.0103912	0.558183	0.599839	FALSE
AM.0	HIF1A	0.00417132	1.01026	10844	-0.0110461	0.972332	4095	0.0152174	0.39863	0.441559	FALSE
AM.0	HNF4A	0.0535206	1.00616	10844	-0.141728	0.969439	4095	0.195249	2.64264e-27	1.11923e-26	FALSE
AM.0	HSF1	-0.0456256	0.965575	10844	0.120821	1.07673	4095	-0.166447	5.64661e-18	1.69398e-17	FALSE
AM.0	JUN	-0.0075749	1.00363	10844	0.0200591	0.990169	4095	-0.027634	0.129585	0.152953	FALSE
AM.0	KMT2A	0.035554	1.02564	10844	-0.0941509	0.922206	4095	0.129705	1.19011e-13	2.44823e-13	FALSE
AM.0	MEF2A	-0.0737906	0.999388	10844	0.195405	0.975125	4095	-0.269196	8.22898e-50	7.40609e-49	TRUE
AM.0	MYB	0.0176729	1.02433	10844	-0.0467998	0.931	4095	0.0644727	0.00024302	0.000336489	FALSE
AM.0	MYC	-0.0814318	1.00812	10844	0.21564	0.944975	4095	-0.297072	2.01359e-62	2.89956e-61	TRUE
AM.0	MYOD1	0.0429484	0.997371	10844	-0.113732	0.998163	4095	0.15668	1.36053e-17	3.91831e-17	FALSE
AM.0	NFE2L2	-0.0776783	0.98346	10844	0.2057	1.01431	4095	-0.283379	2.10147e-52	2.16152e-51	TRUE
AM.0	NFKB	-0.0384453	0.994764	10844	0.101807	1.00679	4095	-0.140253	2.85829e-14	6.05285e-14	FALSE
AM.0	NFKB1	-0.0367654	0.983222	10844	0.0973587	1.03697	4095	-0.134124	9.44973e-13	1.79047e-12	FALSE
AM.0	NR1H3	-0.0331869	0.997155	10844	0.0878824	1.00232	4095	-0.121069	4.55447e-11	7.45277e-11	FALSE
AM.0	NR1H4	-0.063115	0.971438	10844	0.167135	1.05399	4095	-0.23025	1.07127e-33	6.42761e-33	TRUE
AM.0	NR3C1	0.0291861	0.990475	10844	-0.077288	1.02089	4095	0.106474	1.02949e-08	1.54423e-08	FALSE
AM.0	NR4A1	0.0581507	1.00141	10844	-0.153989	0.979845	4095	0.21214	1.63173e-31	9.03728e-31	TRUE
AM.0	NRF1	-0.0892556	1.00411	10844	0.236358	0.949437	4095	-0.325614	4.71711e-74	1.69816e-72	TRUE
AM.0	PGR	-0.0315822	0.993297	10844	0.0836331	1.01291	4095	-0.115215	4.78948e-10	7.49658e-10	FALSE
AM.0	PPARA	-0.0407393	1.01354	10844	0.107882	0.954987	4095	-0.148621	8.59303e-17	2.20964e-16	FALSE
AM.0	PPARG	0.0173293	1.02136	10844	-0.0458898	0.939685	4095	0.063219	0.000345566	0.000469448	FALSE
AM.0	RARA	0.00270992	1.0114	10844	-0.00717616	0.96926	4095	0.00988608	0.582719	0.616997	FALSE
AM.0	REL	-0.00575239	0.993063	10844	0.0152329	1.01811	4095	-0.0209853	0.257948	0.290191	FALSE
AM.0	RELA	-0.0514963	0.974528	10844	0.136368	1.05253	4095	-0.187864	4.51618e-23	1.80647e-22	FALSE
AM.0	RUNX1	-0.0665895	0.987545	10844	0.176336	1.01142	4095	-0.242926	3.25845e-39	2.34608e-38	TRUE
AM.0	RXRA	0.0114333	1.001	10844	-0.0302767	0.996825	4095	0.04171	0.0227146	0.0277195	FALSE
AM.0	SP1	0.04087	0.997548	10844	-0.108228	0.998536	4095	0.149098	4.49084e-16	1.04303e-15	FALSE
AM.0	SP3	0.0436331	1.01401	10844	-0.115545	0.952423	4095	0.159178	4.3926e-19	1.58134e-18	FALSE
AM.0	SPI1	-0.0853673	0.990333	10844	0.226062	0.990344	4095	-0.311429	1.21463e-64	2.18633e-63	TRUE
AM.0	SREBF1	5.05247e-05	1.02853	10844	-0.000133795	0.920305	4095	0.00018432	0.991571	0.991571	FALSE
AM.0	SSRP1	-0.0365129	0.98435	10844	0.0966901	1.03422	4095	-0.133203	1.23464e-12	2.27933e-12	FALSE
AM.0	STAT1	-0.0362837	0.999478	10844	0.096083	0.995133	4095	-0.132367	4.81931e-13	9.37811e-13	FALSE
AM.0	STAT3	-0.0740068	1.01339	10844	0.195978	0.935906	4095	-0.269985	1.50788e-52	1.80946e-51	TRUE
AM.0	STAT5A	0.0319874	1.02324	10844	-0.084706	0.93051	4095	0.116693	3.13689e-11	5.37753e-11	FALSE
AM.0	TBP	-0.0407739	1.01962	10844	0.107974	0.937674	4095	-0.148748	3.72115e-17	1.03047e-16	FALSE
AM.0	TCF7L2	-0.00115613	1.00127	10844	0.00306154	0.996753	4095	-0.00421767	0.817778	0.829296	FALSE
AM.0	TFAP2A	-0.0313956	1.03172	10844	0.0831389	0.90555	4095	-0.114535	3.5597e-11	5.96043e-11	FALSE
AM.0	TP53	0.0100876	1.0079	10844	-0.0267131	0.978384	4095	0.0368008	0.0420139	0.0504167	FALSE
AM.0	TP63	0.0466955	1.02547	10844	-0.123655	0.91789	4095	0.17035	1.63752e-22	6.20534e-22	FALSE
AM.0	USF1	0.0867897	0.996972	10844	-0.229828	0.971324	4095	0.316618	2.67409e-68	6.41781e-67	TRUE
AM.0	XBP1	-0.0403187	0.970477	10844	0.106768	1.06706	4095	-0.147087	1.55488e-14	3.39247e-14	FALSE
AM.0	YY1	-0.0331747	1.01197	10844	0.0878501	0.96219	4095	-0.121025	1.48049e-11	2.66489e-11	FALSE
AM.1	AP1	-0.0882798	1.024	5476	0.214663	0.904004	2252	-0.302942	2.92742e-37	9.23072e-37	TRUE
AM.1	AR	0.037543	1.00755	5476	-0.0912902	0.975611	2252	0.128833	1.82643e-07	2.05474e-07	FALSE
AM.1	CEBPB	-0.0793297	1.01708	5476	0.192899	0.929585	2252	-0.272229	1.37089e-29	3.0845e-29	TRUE
AM.1	CREB1	-0.0666593	0.985681	5476	0.16209	1.01612	2252	-0.228749	1.7913e-19	2.93123e-19	TRUE
AM.1	CTNNB1	-0.0355116	1.00719	5476	0.0863505	0.977152	2252	-0.121862	8.22793e-07	8.22793e-07	FALSE
AM.1	E2F1	-0.0378416	0.989224	5476	0.0920162	1.02011	2252	-0.129858	3.03356e-07	3.21201e-07	FALSE
AM.1	ESR1	0.041952	1.01351	5476	-0.102011	0.958946	2252	0.143963	3.96989e-09	5.10414e-09	FALSE
AM.1	HIF1A	0.0626207	0.990753	5476	-0.15227	1.00622	2252	0.21489	1.44999e-17	2.00768e-17	TRUE
AM.1	JUN	-0.0662894	1.02258	5476	0.16119	0.923408	2252	-0.22748	2.43405e-21	4.38129e-21	TRUE
AM.1	MYC	-0.121584	0.952055	5476	0.295645	1.05104	2252	-0.417229	9.65373e-58	5.79224e-57	TRUE
AM.1	NFE2L2	-0.125399	0.988533	5476	0.304923	0.961578	2252	-0.430322	6.05735e-68	1.09032e-66	TRUE
AM.1	NFKB	-0.0897373	1.0134	5476	0.218207	0.931438	2252	-0.307944	3.07691e-37	9.23072e-37	TRUE
AM.1	PPARA	-0.0688249	1.00341	5476	0.167356	0.971737	2252	-0.236181	1.11966e-21	2.23932e-21	TRUE
AM.1	RELA	-0.115747	0.999392	5476	0.281452	0.944223	2252	-0.397198	1.62767e-59	1.46491e-58	TRUE
AM.1	SP1	0.0926609	1.03383	5476	-0.225316	0.87259	2252	0.317977	2.35094e-42	1.05792e-41	TRUE
AM.1	SPI1	-0.0840506	1.01686	5476	0.204379	0.926706	2252	-0.288429	4.31984e-33	1.11082e-32	TRUE
AM.1	STAT3	-0.0598128	1.02529	5476	0.145442	0.919787	2252	-0.205255	9.4516e-18	1.41774e-17	TRUE
AM.1	TP53	0.0388492	1.00535	5476	-0.0944663	0.980678	2252	0.133316	7.40026e-08	8.88031e-08	FALSE
AM.2	AR	-0.0607037	1.0099	4846	0.188934	0.944191	1557	-0.249637	8.1719e-19	4.08595e-18	TRUE
AM.2	MYC	-0.0443903	1.00994	4846	0.13816	0.955618	1557	-0.18255	1.18374e-10	1.47968e-10	FALSE
AM.2	NFKB	-0.00209892	1.0234	4846	0.00653266	0.923682	1557	-0.00863157	0.754865	0.754865	FALSE
AM.2	SP1	-0.0518781	1.03367	4846	0.161465	0.867742	1557	-0.213343	1.26511e-15	3.16277e-15	TRUE
AM.2	TP53	-0.050157	1.02316	4846	0.156109	0.906941	1557	-0.206266	5.33806e-14	8.89676e-14	TRUE
AM.3	AHR	-0.116894	0.978929	8306	0.226744	1.00159	4282	-0.343638	5.39879e-74	4.03321e-73	TRUE
AM.3	AP1	-0.135305	0.968537	8306	0.262458	1.00795	4282	-0.397762	1.10533e-97	2.00539e-96	TRUE
AM.3	AR	-0.0520241	0.97946	8306	0.100914	1.03134	4282	-0.152938	1.23009e-15	1.81654e-15	FALSE
AM.3	ATF1	-0.0794044	0.97137	8306	0.154025	1.03623	4282	-0.233429	4.3204e-34	1.11978e-33	TRUE
AM.3	ATF2	-0.0290464	1.01294	8306	0.0563427	0.97205	4282	-0.0853891	4.23054e-06	5.02129e-06	FALSE
AM.3	ATF3	-0.0461138	0.99117	8306	0.0894492	1.01104	4282	-0.135563	7.85265e-13	1.08401e-12	FALSE
AM.3	ATF4	-0.0867092	0.984233	8306	0.168194	1.00898	4282	-0.254903	2.41852e-41	7.49152e-41	TRUE
AM.3	BCL6	0.0856951	0.9675	8306	-0.166227	1.04038	4282	0.251922	2.98035e-39	8.41121e-39	TRUE
AM.3	BHLHE40	0.0932299	1.00026	8306	-0.180842	0.974492	4282	0.274072	4.51809e-49	2.12518e-48	TRUE
AM.3	BRCA1	-0.0896324	0.975419	8306	0.173864	1.02402	4282	-0.263497	1.98575e-43	7.20545e-43	TRUE
AM.3	CEBPA	-0.0663265	0.982897	8306	0.128657	1.02026	4282	-0.194983	1.15425e-24	2.06465e-24	FALSE
AM.3	CEBPB	-0.03306	1.01084	8306	0.0641281	0.975566	4282	-0.0971881	1.73072e-07	2.134e-07	FALSE
AM.3	CEBPD	-0.136095	0.954453	8306	0.26399	1.0331	4282	-0.400085	2.1332e-96	3.01018e-95	TRUE
AM.3	CEBPG	-0.125747	0.964305	8306	0.243918	1.02277	4282	-0.369666	1.62022e-83	1.71474e-82	TRUE
AM.3	CREB1	-0.166442	0.957843	8306	0.322855	1.00117	4282	-0.489297	3.79676e-147	2.41094e-145	TRUE
AM.3	CTCF	0.0678915	1.03043	8306	-0.131692	0.924174	4282	0.199584	3.96348e-28	8.25184e-28	FALSE
AM.3	CTNNB1	-0.112153	0.986166	8306	0.217549	0.990855	4282	-0.329703	5.28983e-69	3.53583e-68	TRUE
AM.3	DDIT3	-0.11125	0.955611	8306	0.215797	1.04788	4282	-0.327048	2.58982e-64	1.56622e-63	TRUE
AM.3	DNMT1	-0.0211756	1.00931	8306	0.0410753	0.98051	4282	-0.0622509	0.000838235	0.000902168	FALSE
AM.3	DNMT3A	0.0723697	0.991138	8306	-0.140379	1.00229	4282	0.212749	1.59188e-29	3.54683e-29	TRUE
AM.3	E2F1	-0.120099	0.964478	8306	0.232962	1.02632	4282	-0.353061	3.89265e-76	3.29578e-75	TRUE
AM.3	E2F3	-0.0553331	0.988349	8306	0.107332	1.01376	4282	-0.162665	9.25977e-18	1.45184e-17	FALSE
AM.3	E2F4	-0.0245191	0.996463	8306	0.0475609	1.00524	4282	-0.07208	0.000132912	0.000150713	FALSE
AM.3	EGR1	-0.0881026	0.988882	8306	0.170897	0.99943	4282	-0.258999	5.25345e-43	1.80321e-42	TRUE
AM.3	ENO1	0.0525452	1.00862	8306	-0.101924	0.975134	4282	0.15447	9.93967e-17	1.50278e-16	FALSE
AM.3	EP300	-0.0926346	0.983177	8306	0.179688	1.00797	4282	-0.272322	5.81725e-47	2.46264e-46	TRUE
AM.3	EPAS1	-0.0302485	1.00146	8306	0.0586744	0.994656	4282	-0.0889228	2.16051e-06	2.61319e-06	FALSE
AM.3	ESR1	-0.00205618	1.03215	8306	0.00398848	0.934596	4282	-0.00604466	0.740183	0.740183	FALSE
AM.3	ESR2	-0.111863	0.966372	8306	0.216985	1.02817	4282	-0.328848	3.07092e-66	1.95003e-65	TRUE
AM.3	ETS1	-0.0872067	1.01117	8306	0.169159	0.955655	4282	-0.256366	6.04921e-44	2.25956e-43	TRUE
AM.3	ETS2	-0.0554912	0.994311	8306	0.107639	1.00234	4282	-0.16313	4.91581e-18	7.80385e-18	FALSE
AM.3	EZH2	0.0433676	1.01381	8306	-0.0841223	0.967239	4282	0.12749	5.88842e-12	7.95563e-12	FALSE
AM.3	FLI1	0.0423211	1.00314	8306	-0.0820923	0.988838	4282	0.124413	3.00528e-11	4.01758e-11	FALSE
AM.3	FOS	-0.123655	0.964763	8306	0.239859	1.02339	4282	-0.363513	8.56283e-81	7.76771e-80	TRUE
AM.3	FOXM1	-0.0937124	0.978851	8306	0.181778	1.01555	4282	-0.275491	1.13184e-47	5.13372e-47	TRUE
AM.3	FOXO1	-0.0267684	1.00701	8306	0.051924	0.984312	4282	-0.0786924	2.50916e-05	2.92352e-05	FALSE
AM.3	FOXO3	-0.0150434	1.00954	8306	0.0291804	0.980691	4282	-0.0442239	0.0176649	0.0188524	FALSE
AM.3	GATA2	-0.0455935	1.00281	8306	0.0884398	0.988661	4282	-0.134033	8.04292e-13	1.09833e-12	FALSE
AM.3	GATA3	0.0249231	1.02904	8306	-0.0483446	0.939343	4282	0.0732677	6.0749e-05	7.01375e-05	FALSE
AM.3	GFI1	-0.0358998	1.01701	8306	0.0696366	0.962448	4282	-0.105536	1.12272e-08	1.41174e-08	FALSE
AM.3	GLI1	-0.0810821	1.00823	8306	0.157279	0.964723	4282	-0.238361	6.46046e-38	1.78365e-37	TRUE
AM.3	GLI2	0.0466544	1.01113	8306	-0.0904977	0.971792	4282	0.137152	1.49986e-13	2.14025e-13	FALSE
AM.3	HDAC1	-0.00656961	0.994152	8306	0.0127434	1.01124	4282	-0.019313	0.307284	0.309722	FALSE
AM.3	HES1	-0.0657965	1.01751	8306	0.127629	0.952379	4282	-0.193425	7.54334e-26	1.42986e-25	FALSE
AM.3	HIF1A	-0.0348225	0.977301	8306	0.0675469	1.03942	4282	-0.102369	9.4679e-08	1.17885e-07	FALSE
AM.3	HNF4A	0.0110735	1.01747	8306	-0.0214798	0.964966	4282	0.0325533	0.0784364	0.0809872	FALSE
AM.3	HR	-0.085301	0.997865	8306	0.165462	0.983366	4282	-0.250763	4.80003e-41	1.42001e-40	TRUE
AM.3	HSF1	-0.0930682	0.971227	8306	0.180529	1.02998	4282	-0.273597	2.07782e-46	8.51237e-46	TRUE
AM.3	ID2	0.0683641	1.01156	8306	-0.132609	0.963563	4282	0.200973	1.72898e-27	3.54162e-27	TRUE
AM.3	IRF1	-0.0131593	1.04386	8306	0.0255256	0.908493	4282	-0.0386849	0.0316297	0.0331982	FALSE
AM.3	JUN	-0.0894807	0.965398	8306	0.17357	1.04235	4282	-0.263051	1.50938e-42	4.91517e-42	TRUE
AM.3	JUND	-0.136628	0.948489	8306	0.265025	1.0433	4282	-0.401653	3.60495e-96	4.57828e-95	TRUE
AM.3	KAT5	-0.0401827	1.01331	8306	0.0779443	0.969046	4282	-0.118127	1.87052e-10	2.44904e-10	FALSE
AM.3	KAT7	-0.0745356	0.997117	8306	0.14458	0.989806	4282	-0.219116	1.41667e-31	3.27122e-31	TRUE
AM.3	KLF2	0.0779272	0.972693	8306	-0.151159	1.03446	4282	0.229086	5.91783e-33	1.45239e-32	TRUE
AM.3	KLF4	-0.071551	0.977497	8306	0.138791	1.02828	4282	-0.210342	3.23722e-28	6.85212e-28	TRUE
AM.3	KLF5	-0.0765025	0.981941	8306	0.148396	1.01798	4282	-0.224898	2.58383e-32	6.19143e-32	TRUE
AM.3	KLF6	-0.0764278	1.00559	8306	0.148251	0.972198	4282	-0.224678	1.18317e-33	3.00526e-33	TRUE
AM.3	KMT2A	0.0444815	1.04229	8306	-0.0862828	0.906303	4282	0.130764	3.58939e-13	5.06503e-13	FALSE
AM.3	MAX	-0.137812	0.944542	8306	0.267321	1.04934	4282	-0.405133	3.2239e-97	5.11794e-96	TRUE
AM.3	MITF	0.0226019	1.03453	8306	-0.043842	0.927909	4282	0.0664439	0.000255569	0.000287233	FALSE
AM.3	MTA1	-0.0680536	1.0053	8306	0.132007	0.976312	4282	-0.200061	6.1343e-27	1.19855e-26	TRUE
AM.3	MTF1	0.0395956	1.00986	8306	-0.0768055	0.976136	4282	0.116401	3.92412e-10	5.08533e-10	FALSE
AM.3	MYB	0.0883476	1.02188	8306	-0.171372	0.932672	4282	0.25972	4.8983e-46	1.94401e-45	TRUE
AM.3	MYC	-0.0859364	1.00981	8306	0.166695	0.959094	4282	-0.252631	1.36844e-42	4.57346e-42	TRUE
AM.3	MYCN	0.0880774	1.01511	8306	-0.170848	0.947067	4282	0.258925	3.75321e-45	1.44442e-44	TRUE
AM.3	MYOD1	0.101519	1.00924	8306	-0.196921	0.951544	4282	0.29844	4.29704e-59	2.1829e-58	TRUE
AM.3	NCOA1	-0.0716737	0.980635	8306	0.139029	1.02242	4282	-0.210702	1.84568e-28	3.9729e-28	TRUE
AM.3	NFATC1	-0.143805	0.952573	8306	0.278946	1.0305	4282	-0.422751	1.46059e-107	3.7099e-106	TRUE
AM.3	NFATC2	-0.0715684	1.00168	8306	0.138825	0.982093	4282	-0.210393	1.86797e-29	4.09021e-29	TRUE
AM.3	NFE2L2	0.0120213	0.996492	8306	-0.0233182	1.00648	4282	0.0353394	0.0611487	0.0636548	FALSE
AM.3	NFIA	0.0507057	1.05058	8306	-0.0983562	0.885636	4282	0.149062	5.77262e-17	8.8328e-17	FALSE
AM.3	NFKB	-0.136418	0.944573	8306	0.264616	1.05032	4282	-0.401034	3.15973e-95	3.64805e-94	TRUE
AM.3	NFKB1	-0.119089	0.957514	8306	0.231002	1.03956	4282	-0.350091	5.98034e-74	4.21946e-73	TRUE
AM.3	NFKB2	-0.0692441	0.988331	8306	0.134316	1.00891	4282	-0.20356	5.20748e-27	1.03336e-26	TRUE
AM.3	NFYA	-0.177755	0.951923	8306	0.3448	1.00103	4282	-0.522555	2.94565e-167	3.74097e-165	TRUE
AM.3	NR1H2	-0.0888987	0.983346	8306	0.172441	1.00957	4282	-0.26134	2.45379e-43	8.65641e-43	TRUE
AM.3	NR1H3	-0.0377118	0.993528	8306	0.0731514	1.00854	4282	-0.110863	4.45107e-09	5.65286e-09	FALSE
AM.3	NR1H4	0.0691139	0.98222	8306	-0.134063	1.02047	4282	0.203177	1.24557e-26	2.39679e-26	TRUE
AM.3	NR3C1	0.0274149	1.02887	8306	-0.0531781	0.939323	4282	0.080593	1.03018e-05	1.21141e-05	FALSE
AM.3	NR4A1	0.158946	0.933941	8306	-0.308316	1.0507	4282	0.467262	4.44807e-128	1.88302e-126	TRUE
AM.3	NR4A2	0.105806	0.977427	8306	-0.205237	1.01142	4282	0.311043	1.88846e-60	1.04276e-59	TRUE
AM.3	NRF1	-0.0470934	1.00915	8306	0.0913493	0.975672	4282	-0.138443	9.87241e-14	1.42477e-13	FALSE
AM.3	PAX5	-0.104664	0.950305	8306	0.203023	1.06103	4282	-0.307687	1.84006e-56	8.98798e-56	TRUE
AM.3	PAX6	0.0447048	1.03515	8306	-0.086716	0.92199	4282	0.131421	4.11987e-13	5.74971e-13	FALSE
AM.3	PGR	0.118968	1.00652	8306	-0.230768	0.945575	4282	0.349736	8.1503e-81	7.76771e-80	TRUE
AM.3	PPARA	-0.0525218	1.00636	8306	0.101879	0.97967	4282	-0.154401	1.19579e-16	1.78665e-16	FALSE
AM.3	PPARD	-0.0844236	0.993017	8306	0.163761	0.993268	4282	-0.248184	7.16162e-40	2.0671e-39	TRUE
AM.3	PPARG	0.0219929	0.99087	8306	-0.0426607	1.01624	4282	0.0646536	0.000651601	0.000719594	FALSE
AM.3	RARA	-0.0758501	1.02132	8306	0.14713	0.940109	4282	-0.22298	3.56827e-34	9.44104e-34	TRUE
AM.3	RBPJ	-0.0149257	1.00213	8306	0.0289522	0.995341	4282	-0.0438779	0.0194204	0.0205533	FALSE
AM.3	REL	-0.0902014	1.01606	8306	0.174968	0.943927	4282	-0.265169	2.10199e-47	9.20527e-47	TRUE
AM.3	RELA	-0.119811	0.961191	8306	0.232404	1.03248	4282	-0.352215	2.46755e-75	1.95862e-74	TRUE
AM.3	RELB	-0.0408455	1.00767	8306	0.07923	0.980222	4282	-0.120076	1.18206e-10	1.56376e-10	FALSE
AM.3	RUNX1	-0.0893658	0.958462	8306	0.173347	1.05475	4282	-0.262713	5.95728e-42	1.89143e-41	TRUE
AM.3	RXRA	-0.021681	1.01936	8306	0.0420558	0.960064	4282	-0.0637368	0.000553197	0.000616281	FALSE
AM.3	SMAD1	-0.0775672	0.977878	8306	0.150461	1.02509	4282	-0.228028	5.94678e-33	1.45239e-32	TRUE
AM.3	SMAD2	-0.0579379	1.00051	8306	0.112385	0.9895	4282	-0.170323	9.62988e-20	1.56794e-19	FALSE
AM.3	SMAD3	0.0606765	1.00091	8306	-0.117697	0.987781	4282	0.178374	1.5695e-21	2.65768e-21	FALSE
AM.3	SMAD4	0.0570785	1.02011	8306	-0.110718	0.950176	4282	0.167796	6.76775e-20	1.11624e-19	FALSE
AM.3	SMAD5	-0.0107053	1.0274	8306	0.0207655	0.944353	4282	-0.0314708	0.0857327	0.0878069	FALSE
AM.3	SMARCA1	-0.0297607	1.01477	8306	0.0577282	0.96823	4282	-0.0874889	2.34074e-06	2.80447e-06	FALSE
AM.3	SP1	-0.0378578	1.0055	8306	0.0734346	0.985219	4282	-0.111292	2.58103e-09	3.31102e-09	FALSE
AM.3	SP3	0.0217039	1.00256	8306	-0.0421002	0.993777	4282	0.0638041	0.000670831	0.000733939	FALSE
AM.3	SPI1	-0.108809	0.940275	8306	0.211062	1.07588	4282	-0.319871	5.45143e-60	2.88472e-59	TRUE
AM.3	SREBF1	-0.0642131	1.02515	8306	0.124557	0.936957	4282	-0.18877	4.77596e-25	8.79053e-25	FALSE
AM.3	SRF	-0.0505803	0.982905	8306	0.098113	1.02538	4282	-0.148693	6.08275e-15	8.87942e-15	FALSE
AM.3	SSRP1	-0.0848891	1.00293	8306	0.164663	0.973524	4282	-0.249553	4.80792e-41	1.42001e-40	TRUE
AM.3	STAT1	-0.0525858	1.03432	8306	0.102003	0.921431	4282	-0.154589	1.44741e-17	2.24172e-17	FALSE
AM.3	STAT3	-0.0628004	0.990271	8306	0.121817	1.00762	4282	-0.184617	1.53915e-22	2.67769e-22	FALSE
AM.3	STAT5A	0.00721057	1.02333	8306	-0.0139867	0.953073	4282	0.0211973	0.249097	0.253082	FALSE
AM.3	STAT6	-0.0757579	0.991523	8306	0.146951	1.00013	4282	-0.222709	2.98588e-32	7.02234e-32	TRUE
AM.3	TAL1	0.103238	1.01433	8306	-0.200256	0.939912	4282	0.303494	1.00983e-61	5.82948e-61	TRUE
AM.3	TBP	-0.0212276	1.02459	8306	0.0411762	0.949261	4282	-0.0624038	0.000676148	0.000733939	FALSE
AM.3	TCF4	-0.0647765	1.00331	8306	0.12565	0.981541	4282	-0.190426	1.90033e-24	3.35197e-24	FALSE
AM.3	TCF7L2	-0.0248609	1.00464	8306	0.0482239	0.989274	4282	-0.0730848	9.44761e-05	0.000108094	FALSE
AM.3	TFAP2A	-0.0561576	1.02667	8306	0.108931	0.93669	4282	-0.165089	1.52275e-19	2.44796e-19	FALSE
AM.3	TP53	-0.032299	0.978953	8306	0.0626518	1.03686	4282	-0.0949508	7.18688e-07	8.77629e-07	FALSE
AM.3	TP63	-0.076145	0.972277	8306	0.147702	1.03597	4282	-0.223847	1.68391e-31	3.81887e-31	TRUE
AM.3	TP73	-0.142976	0.9631	8306	0.277337	1.01201	4282	-0.420312	2.62808e-108	8.34416e-107	TRUE
AM.3	TWIST1	-0.0650907	1.02309	8306	0.12626	0.940976	4282	-0.19135	1.34671e-25	2.51517e-25	FALSE
AM.3	USF1	0.0582104	1.0197	8306	-0.112913	0.950633	4282	0.171124	1.27716e-20	2.13421e-20	FALSE
AM.3	VDR	-0.0693329	0.994901	8306	0.134488	0.996268	4282	-0.203821	2.16763e-27	4.36966e-27	TRUE
AM.3	WT1	0.132295	1.01553	8306	-0.256619	0.916335	4282	0.388915	3.12561e-102	6.61588e-101	TRUE
AM.3	XBP1	-0.0799117	1.00056	8306	0.155009	0.980629	4282	-0.23492	2.44222e-36	6.59918e-36	TRUE
AM.3	YBX1	0.0646623	1.01077	8306	-0.125429	0.966632	4282	0.190091	1.06259e-24	1.92784e-24	FALSE
AM.3	YY1	-0.0603159	1.01184	8306	0.116998	0.96605	4282	-0.177314	1.02443e-21	1.75815e-21	FALSE
MoAM.4	AHR	-0.111871	0.941732	2657	0.296352	1.08619	1003	-0.408223	5.20361e-25	3.45082e-24	TRUE
MoAM.4	AP1	-0.0315156	0.964161	2657	0.0834864	1.08535	1003	-0.115002	0.00326946	0.00416113	FALSE
MoAM.4	AR	-0.0662235	1.00052	2657	0.17543	0.977666	1003	-0.241653	4.48703e-11	1.08724e-10	TRUE
MoAM.4	ATF1	-0.0476932	1.01858	2657	0.126342	0.937856	1003	-0.174035	1.0993e-06	1.84683e-06	FALSE
MoAM.4	ATF2	-0.0382519	1.01831	2657	0.101331	0.942802	1003	-0.139583	9.67275e-05	0.00013393	FALSE
MoAM.4	ATF3	-0.0143349	1.0152	2657	0.0379738	0.958036	1003	-0.0523087	0.147468	0.173654	FALSE
MoAM.4	ATF4	-0.0647766	0.993436	2657	0.171597	0.997537	1003	-0.236373	1.96159e-10	4.41358e-10	TRUE
MoAM.4	BCL6	0.0588697	1.02521	2657	-0.155949	0.912208	1003	0.214819	1.00919e-09	2.11929e-09	TRUE
MoAM.4	BMAL1	0.00323706	1.01233	2657	-0.00857514	0.967028	1003	0.0118122	0.744944	0.775727	FALSE
MoAM.4	CEBPA	0.00855	1.00322	2657	-0.0226494	0.991549	1003	0.0311994	0.397487	0.435508	FALSE
MoAM.4	CEBPB	0.0759736	0.978972	2657	-0.201258	1.02735	1003	0.277232	2.53367e-13	6.79238e-13	TRUE
MoAM.4	CEBPD	-0.0427416	1.02337	2657	0.113225	0.926263	1003	-0.155966	1.07842e-05	1.61763e-05	FALSE
MoAM.4	CEBPG	-0.082129	1.00813	2657	0.217564	0.944699	1003	-0.299693	8.43278e-17	3.12509e-16	TRUE
MoAM.4	CREB1	-0.120657	0.94642	2657	0.319626	1.0661	1003	-0.440283	2.10519e-29	2.4114e-28	TRUE
MoAM.4	CTCF	-0.0666801	0.987604	2657	0.176639	1.01157	1003	-0.243319	8.42657e-11	2.0033e-10	TRUE
MoAM.4	CTNNB1	-0.0945193	0.972037	2657	0.250387	1.02991	1003	-0.344906	1.2571e-19	5.86646e-19	TRUE
MoAM.4	CUX1	0.0122242	1.03617	2657	-0.0323826	0.896842	1003	0.0446069	0.199118	0.22808	FALSE
MoAM.4	DDIT3	-0.0427147	1.00528	2657	0.113154	0.977392	1003	-0.155868	2.05825e-05	3.01558e-05	FALSE
MoAM.4	DNMT1	0.0080138	1.02597	2657	-0.021229	0.927852	1003	0.0292428	0.409116	0.444384	FALSE
MoAM.4	E2F1	-0.0773451	0.975378	2657	0.204891	1.03539	1003	-0.282236	1.25559e-13	3.59556e-13	TRUE
MoAM.4	E2F4	0.0306492	1.02916	2657	-0.0811914	0.91382	1003	0.111841	0.00145764	0.00187411	FALSE
MoAM.4	EGR1	-0.033095	1.01705	2657	0.0876704	0.948269	1003	-0.120765	0.000772558	0.00101398	FALSE
MoAM.4	ELF1	0.0523311	0.99119	2657	-0.138628	1.01044	1003	0.190959	3.28015e-07	5.74025e-07	FALSE
MoAM.4	ELF4	-0.0766849	0.98829	2657	0.203142	1.0029	1003	-0.279827	6.46175e-14	1.89344e-13	TRUE
MoAM.4	EP300	-0.115427	0.958796	2657	0.305772	1.04212	1003	-0.421199	7.14062e-28	5.99812e-27	TRUE
MoAM.4	EPAS1	-0.0515557	1.01544	2657	0.136574	0.944886	1003	-0.188129	1.58309e-07	2.89086e-07	FALSE
MoAM.4	ESR1	-0.00901457	1.01854	2657	0.0238801	0.949221	1003	-0.0328946	0.359625	0.39748	FALSE
MoAM.4	ESR2	-0.100145	0.994899	2657	0.265289	0.964847	1003	-0.365434	1.59999e-23	9.59992e-23	TRUE
MoAM.4	ETS1	-0.118071	0.957794	2657	0.312776	1.0417	1003	-0.430847	4.50865e-29	4.73409e-28	TRUE
MoAM.4	ETS2	0.0480351	1.00065	2657	-0.127247	0.987521	1003	0.175283	1.96805e-06	3.22045e-06	FALSE
MoAM.4	ETV4	-0.11642	0.963774	2657	0.308403	1.0288	1003	-0.424823	9.22224e-29	8.30002e-28	TRUE
MoAM.4	EZH2	-0.0456809	1.01214	2657	0.121011	0.957102	1003	-0.166692	3.99444e-06	6.37088e-06	FALSE
MoAM.4	FOS	-0.125426	0.954263	2657	0.332261	1.04197	1003	-0.457688	1.74156e-32	3.65728e-31	TRUE
MoAM.4	FOXM1	-0.0567505	0.967193	2657	0.150335	1.06813	1003	-0.207086	9.2056e-08	1.70574e-07	TRUE
MoAM.4	FOXO1	-0.0493466	0.989632	2657	0.130722	1.01593	1003	-0.180068	1.58514e-06	2.628e-06	FALSE
MoAM.4	FOXO3	-0.0759662	1.01879	2657	0.201239	0.919027	1003	-0.277205	4.74933e-15	1.49604e-14	TRUE
MoAM.4	GATA1	0.0578556	1.01475	2657	-0.153263	0.943302	1003	0.211118	3.95945e-09	8.04662e-09	TRUE
MoAM.4	GATA3	0.0039286	0.982381	2657	-0.0104071	1.04567	1003	0.0143357	0.706937	0.748521	FALSE
MoAM.4	GFI1	0.00238855	1.02777	2657	-0.0063274	0.922874	1003	0.00871595	0.80505	0.81149	FALSE
MoAM.4	GLI1	-0.0573045	1.03085	2657	0.151803	0.896201	1003	-0.209107	1.88459e-09	3.89276e-09	TRUE
MoAM.4	GLI2	-0.0863529	0.976906	2657	0.228753	1.02463	1003	-0.315106	8.88712e-17	3.19936e-16	TRUE
MoAM.4	HDAC1	-0.0116334	1.02433	2657	0.0308176	0.932274	1003	-0.042451	0.232137	0.263507	FALSE
MoAM.4	HES1	0.0684916	0.986406	2657	-0.181438	1.0135	1003	0.249929	2.74247e-11	6.91103e-11	TRUE
MoAM.4	HIF1A	-0.0553711	0.996124	2657	0.146681	0.995912	1003	-0.202052	5.01016e-08	9.712e-08	TRUE
MoAM.4	HNF4A	0.0973221	1.01032	2657	-0.257811	0.92432	1003	0.355133	2.01548e-23	1.15432e-22	TRUE
MoAM.4	HR	-0.0780115	0.992239	2657	0.206657	0.991511	1003	-0.284668	1.57352e-14	4.72056e-14	TRUE
MoAM.4	HSF1	-0.0890663	0.964487	2657	0.235941	1.05317	1003	-0.325008	3.5709e-17	1.36344e-16	TRUE
MoAM.4	IRF1	-0.0965008	0.985162	2657	0.255636	0.994468	1003	-0.352137	3.12275e-21	1.57387e-20	TRUE
MoAM.4	JUN	-0.0876146	0.960959	2657	0.232096	1.06285	1003	-0.31971	1.70244e-16	5.95853e-16	TRUE
MoAM.4	JUNB	0.00775524	0.992791	2657	-0.020544	1.01907	1003	0.0282993	0.450577	0.485237	FALSE
MoAM.4	JUND	-0.126293	0.947841	2657	0.334557	1.05639	1003	-0.46085	2.40161e-32	4.3229e-31	TRUE
MoAM.4	KAT5	-0.0727817	1.01228	2657	0.192803	0.940335	1003	-0.265584	1.29518e-13	3.6265e-13	TRUE
MoAM.4	KAT7	-0.0210979	1.02959	2657	0.0558896	0.915149	1003	-0.0769875	0.0285194	0.0348878	FALSE
MoAM.4	KLF10	-0.0440418	1.00531	2657	0.116669	0.976725	1003	-0.160711	1.1221e-05	1.66335e-05	FALSE
MoAM.4	KLF2	-0.00339197	1.03059	2657	0.00898551	0.914454	1003	-0.0123775	0.724556	0.760783	FALSE
MoAM.4	KLF4	-0.068353	0.996471	2657	0.181071	0.98715	1003	-0.249424	1.41031e-11	3.62651e-11	TRUE
MoAM.4	KLF5	-0.0681166	0.961625	2657	0.180445	1.07501	1003	-0.248561	1.80941e-10	4.1452e-10	TRUE
MoAM.4	KLF6	0.00269496	1.01985	2657	-0.00713908	0.945866	1003	0.00983404	0.783729	0.796958	FALSE
MoAM.4	KMT2A	-0.00209111	0.996457	2657	0.00553945	1.0098	1003	-0.00763056	0.837876	0.837876	FALSE
MoAM.4	MBD2	-0.0101757	1.0256	2657	0.026956	0.928724	1003	-0.0371318	0.294857	0.331714	FALSE
MoAM.4	MITF	0.0521841	1.03032	2657	-0.138238	0.900808	1003	0.190422	4.84409e-08	9.5368e-08	FALSE
MoAM.4	MTA1	-0.0478305	0.971632	2657	0.126705	1.06166	1003	-0.174536	6.07579e-06	9.45122e-06	FALSE
MoAM.4	MYB	0.0253024	1.01352	2657	-0.0670274	0.96055	1003	0.0923298	0.0107151	0.0133674	FALSE
MoAM.4	MYC	-0.0429279	1.02252	2657	0.113718	0.928667	1003	-0.156646	1.01844e-05	1.54607e-05	FALSE
MoAM.4	MYOD1	0.0809749	0.997037	2657	-0.214507	0.976339	1003	0.295482	8.52051e-16	2.75278e-15	TRUE
MoAM.4	NCOA1	-0.0655032	1.00878	2657	0.173522	0.95538	1003	-0.239025	3.89256e-11	9.61691e-11	TRUE
MoAM.4	NCOR1	-0.0193932	1.03035	2657	0.0513735	0.91324	1003	-0.0707667	0.0438365	0.0526038	FALSE
MoAM.4	NCOR2	0.0654846	0.962695	2657	-0.173472	1.07405	1003	0.238957	8.47354e-10	1.8096e-09	TRUE
MoAM.4	NEUROD1	0.00952458	1.0124	2657	-0.0252311	0.966416	1003	0.0347557	0.338319	0.377241	FALSE
MoAM.4	NFATC1	-0.0350335	1.00737	2657	0.0928055	0.974631	1003	-0.127839	0.000464437	0.000615991	FALSE
MoAM.4	NFE2L2	-0.0611256	1.0093	2657	0.161925	0.956718	1003	-0.223051	7.0899e-10	1.54022e-09	TRUE
MoAM.4	NFIA	0.0352274	1.02418	2657	-0.0933191	0.926955	1003	0.128546	0.000286483	0.000388138	FALSE
MoAM.4	NFKB	-0.091634	0.966084	2657	0.242743	1.04714	1003	-0.334377	3.37907e-18	1.46815e-17	TRUE
MoAM.4	NFKB1	-0.107816	0.947245	2657	0.28561	1.07741	1003	-0.393425	1.29248e-23	8.14259e-23	TRUE
MoAM.4	NR0B2	-0.115074	0.972916	2657	0.304838	1.00722	1003	-0.419913	7.03463e-29	6.81818e-28	TRUE
MoAM.4	NR1H3	-0.0182864	1.01656	2657	0.0484416	0.953547	1003	-0.066728	0.0639015	0.0759584	FALSE
MoAM.4	NR1I2	0.0463827	1.03747	2657	-0.12287	0.881935	1003	0.169253	9.05004e-07	1.54095e-06	FALSE
MoAM.4	NR2C2	-0.100937	0.975181	2657	0.267388	1.01605	1003	-0.368326	1.78985e-22	9.3967e-22	TRUE
MoAM.4	NR3C1	0.121061	0.962423	2657	-0.320698	1.02696	1003	0.441759	5.62674e-31	7.87743e-30	TRUE
MoAM.4	NR3C2	-0.0400483	1.01206	2657	0.10609	0.959769	1003	-0.146138	5.39444e-05	7.72386e-05	FALSE
MoAM.4	NR4A1	0.0674136	0.965097	2657	-0.178582	1.06716	1003	0.245996	2.27046e-10	5.01892e-10	TRUE
MoAM.4	NRF1	-0.013472	1.01739	2657	0.0356879	0.95198	1003	-0.0491599	0.171763	0.20039	FALSE
MoAM.4	NRG1	-0.0434748	0.968723	2657	0.115167	1.07048	1003	-0.158642	4.29443e-05	6.21951e-05	FALSE
MoAM.4	PAX5	-0.100777	1.01954	2657	0.266962	0.893393	1003	-0.367739	6.41624e-26	4.75557e-25	TRUE
MoAM.4	PAX6	-0.104606	0.951828	2657	0.277108	1.06974	1003	-0.381714	1.51529e-22	8.30114e-22	TRUE
MoAM.4	PGR	-0.0540613	0.985479	2657	0.143211	1.02427	1003	-0.197273	1.70006e-07	3.06011e-07	FALSE
MoAM.4	POU2F1	0.027433	0.99679	2657	-0.0726714	1.00534	1003	0.100104	0.00714464	0.00900224	FALSE
MoAM.4	PPARA	-0.129036	1.01048	2657	0.341823	0.885457	1003	-0.470858	1.99335e-41	8.37206e-40	TRUE
MoAM.4	PPARD	-0.149601	0.95867	2657	0.3963	0.99951	1003	-0.5459	2.33812e-47	1.47301e-45	TRUE
MoAM.4	PPARG	-0.00323889	0.988356	2657	0.00858	1.03066	1003	-0.0118189	0.754395	0.779129	FALSE
MoAM.4	RARA	-0.0352488	1.01095	2657	0.0933758	0.964685	1003	-0.128625	0.000394095	0.000528255	FALSE
MoAM.4	REL	-0.11778	0.976046	2657	0.312005	0.996111	1003	-0.429784	1.51971e-30	1.91483e-29	TRUE
MoAM.4	RELA	-0.124822	0.945732	2657	0.330661	1.06308	1003	-0.455484	2.07923e-31	3.27479e-30	TRUE
MoAM.4	RUNX1	-0.0804342	0.977945	2657	0.213074	1.02666	1003	-0.293509	9.52835e-15	2.92823e-14	TRUE
MoAM.4	RUNX3	0.110349	0.972249	2657	-0.29232	1.01403	1003	0.402669	1.60354e-26	1.26279e-25	TRUE
MoAM.4	RXRA	-0.0520625	1.0008	2657	0.137916	0.985148	1003	-0.189979	2.45074e-07	4.3492e-07	FALSE
MoAM.4	SMAD1	-0.0403082	0.988784	2657	0.106778	1.02196	1003	-0.147087	9.26637e-05	0.000129729	FALSE
MoAM.4	SMAD2	-0.103382	0.995214	2657	0.273865	0.960671	1003	-0.377247	4.64282e-25	3.24998e-24	TRUE
MoAM.4	SMAD3	-0.0933193	0.972367	2657	0.247208	1.03015	1003	-0.340527	3.57391e-19	1.60826e-18	TRUE
MoAM.4	SMAD4	-0.0472041	1.00758	2657	0.125046	0.969073	1003	-0.17225	2.25502e-06	3.64272e-06	FALSE
MoAM.4	SMAD7	0.0230812	0.979402	2657	-0.0611434	1.05067	1003	0.0842247	0.0277266	0.0342506	FALSE
MoAM.4	SNAI1	0.0539758	1.00709	2657	-0.142985	0.966989	1003	0.19696	6.24736e-08	1.19268e-07	FALSE
MoAM.4	SP1	-0.0904831	0.971957	2657	0.239695	1.03362	1003	-0.330178	4.61046e-18	1.93639e-17	TRUE
MoAM.4	SP3	0.078925	1.02156	2657	-0.209076	0.908392	1003	0.288001	2.58968e-16	8.81891e-16	TRUE
MoAM.4	SPI1	0.0137996	0.998885	2657	-0.0365558	1.00253	1003	0.0503554	0.175043	0.202343	FALSE
MoAM.4	SREBF1	-0.0384775	1.00552	2657	0.101929	0.978422	1003	-0.140406	0.000125739	0.000172208	FALSE
MoAM.4	SRF	-0.0772404	0.963425	2657	0.204614	1.06472	1003	-0.281854	3.64549e-13	9.56942e-13	TRUE
MoAM.4	SSRP1	-0.0955902	0.964979	2657	0.253223	1.04642	1003	-0.348814	1.17204e-19	5.67987e-19	TRUE
MoAM.4	STAT1	0.086298	0.997869	2657	-0.228608	0.96965	1003	0.314906	7.60731e-18	3.092e-17	TRUE
MoAM.4	STAT3	-0.127905	0.975083	2657	0.338826	0.986482	1003	-0.466731	5.43811e-36	1.3704e-34	TRUE
MoAM.4	STAT5A	0.0785465	1.0178	2657	-0.208074	0.919822	1003	0.286621	5.83132e-16	1.93354e-15	TRUE
MoAM.4	STAT6	-0.132681	0.986414	2657	0.351478	0.949838	1003	-0.484159	2.76615e-40	8.71336e-39	TRUE
MoAM.4	TBP	-0.031401	1.0259	2657	0.0831828	0.923237	1003	-0.114584	0.00118895	0.00154441	FALSE
MoAM.4	TCF7L2	-0.0389209	1.02307	2657	0.103103	0.928791	1003	-0.142024	6.28084e-05	8.89198e-05	FALSE
MoAM.4	TFAP2A	-0.0791199	0.954961	2657	0.209593	1.08343	1003	-0.288713	1.86435e-13	5.1067e-13	TRUE
MoAM.4	TFAP4	-0.087302	0.983702	2657	0.231268	1.00645	1003	-0.31857	1.81624e-17	7.15144e-17	TRUE
MoAM.4	TP53	-0.0208675	1.01227	2657	0.0552791	0.965045	1003	-0.0761465	0.0358178	0.0433947	FALSE
MoAM.4	TP63	0.0441304	1.02286	2657	-0.116904	0.927131	1003	0.161034	5.60172e-06	8.82271e-06	FALSE
MoAM.4	TP73	-0.00264402	1.02873	2657	0.00700416	0.920024	1003	-0.00964818	0.784308	0.796958	FALSE
MoAM.4	TWIST1	-0.043199	1.0207	2657	0.114436	0.933834	1003	-0.157635	9.57799e-06	1.47174e-05	FALSE
MoAM.4	USF1	0.14297	1.00536	2657	-0.378735	0.880191	1003	0.521705	1.65864e-50	2.08989e-48	TRUE
MoAM.4	USF2	0.0521796	1.01987	2657	-0.138227	0.931812	1003	0.190406	8.79974e-08	1.65488e-07	FALSE
MoAM.4	VDR	-0.0493717	1.00392	2657	0.130788	0.978065	1003	-0.18016	8.76277e-07	1.51248e-06	FALSE
MoAM.4	WT1	-0.0576459	0.990762	2657	0.152707	1.00876	1003	-0.210353	1.81957e-08	3.63914e-08	TRUE
MoAM.4	YY1	-0.0644744	1.00265	2657	0.170796	0.972977	1003	-0.235271	1.24922e-10	2.91486e-10	TRUE
MoAM.4	ZEB1	0.00502795	1.02261	2657	-0.0133193	0.937823	1003	0.0183472	0.606791	0.647929	FALSE
AM.5	AP1	-0.0100922	1.02638	4111	0.0348355	0.902598	1191	-0.0449277	0.143023	0.157326	FALSE
AM.5	EGR1	-0.0427534	1.01042	4111	0.147573	0.948871	1191	-0.190326	2.25018e-09	3.536e-09	FALSE
AM.5	JUN	0.00511851	1.0148	4111	-0.0176677	0.947335	1191	0.0227862	0.472151	0.472151	FALSE
AM.5	MYC	0.0873344	0.985249	4111	-0.301454	0.992312	1191	0.388789	1.11261e-31	3.05967e-31	TRUE
AM.5	NFKB	-0.0999015	0.998449	4111	0.344832	0.926316	1191	-0.444734	1.77857e-44	1.95643e-43	TRUE
AM.5	PPARA	0.0342597	1.00648	4111	-0.118255	0.968435	1191	0.152514	2.2521e-06	2.75256e-06	FALSE
AM.5	PPARG	-0.0862701	1.00347	4111	0.29778	0.928624	1191	-0.38405	8.568e-34	3.1416e-33	TRUE
AM.5	SP1	0.0983548	0.973052	4111	-0.339493	1.0177	1191	0.437848	4.12382e-38	2.2681e-37	TRUE
AM.5	SPI1	0.0373659	1.02671	4111	-0.128977	0.890175	1191	0.166343	4.76975e-08	6.5584e-08	FALSE
AM.5	STAT1	0.0581695	1.00746	4111	-0.200785	0.947152	1191	0.258954	4.62047e-16	8.47086e-16	TRUE
AM.5	TP53	-0.0684095	0.957499	4111	0.236131	1.10282	1191	-0.30454	1.31529e-17	2.89364e-17	TRUE
AM.6	AHR	-0.0955781	1.00571	2344	0.206674	0.955839	1084	-0.302252	4.52275e-17	1.29515e-16	TRUE
AM.6	AP1	-0.0851238	1.00462	2344	0.184068	0.965039	1084	-0.269192	9.51611e-14	2.14113e-13	TRUE
AM.6	AR	-0.00047352	1.03906	2344	0.00102392	0.910293	1084	-0.00149744	0.965878	0.965878	FALSE
AM.6	ATF1	-0.0381969	1.02967	2344	0.0825955	0.927711	1084	-0.120792	0.000633244	0.000797887	FALSE
AM.6	ATF2	-0.140555	1.00599	2344	0.303931	0.916356	1084	-0.444485	2.85721e-36	4.50011e-35	TRUE
AM.6	ATF3	-0.0688631	1.00757	2344	0.148907	0.967252	1084	-0.21777	1.71222e-09	3.26879e-09	TRUE
AM.6	CEBPA	-0.0956937	0.992836	2344	0.206924	0.984446	1084	-0.302618	1.24972e-16	3.28051e-16	TRUE
AM.6	CEBPB	-0.0617787	1.03523	2344	0.133588	0.905351	1084	-0.195367	2.275e-08	3.77171e-08	FALSE
AM.6	CEBPG	-0.166009	0.982475	2344	0.358971	0.942052	1084	-0.52498	2.74621e-48	5.76703e-47	TRUE
AM.6	CREB1	-0.181451	0.9773	2344	0.392363	0.934171	1084	-0.573814	1.29382e-57	4.07555e-56	TRUE
AM.6	CTNNB1	-0.128434	0.99048	2344	0.27772	0.963855	1084	-0.406153	3.81361e-29	2.18416e-28	TRUE
AM.6	DDIT3	-0.135699	0.982339	2344	0.29343	0.975002	1084	-0.429129	6.37657e-32	5.73891e-31	TRUE
AM.6	DNMT1	-0.0459377	1.00441	2344	0.0993339	0.983542	1084	-0.145272	6.70819e-05	8.99183e-05	FALSE
AM.6	E2F1	-0.0909461	1.0359	2344	0.196658	0.886682	1084	-0.287605	1.02723e-16	2.81372e-16	TRUE
AM.6	E2F4	0.0109755	1.05134	2344	-0.023733	0.878785	1084	0.0347085	0.313212	0.346182	FALSE
AM.6	EGR1	-0.139853	1.00583	2344	0.302413	0.91748	1084	-0.442265	6.895e-36	8.6877e-35	TRUE
AM.6	ESR1	0.12726	1.00067	2344	-0.275182	0.941892	1084	0.402442	2.58574e-29	1.62902e-28	TRUE
AM.6	ESR2	-0.0611477	1.04934	2344	0.132224	0.869814	1084	-0.193371	1.69758e-08	2.89047e-08	FALSE
AM.6	ETS1	-0.0886379	1.00028	2344	0.191667	0.972597	1084	-0.280305	1.15129e-14	2.78967e-14	TRUE
AM.6	EZH2	-0.0481167	1.04148	2344	0.104046	0.895486	1084	-0.152162	1.19307e-05	1.70826e-05	FALSE
AM.6	FOS	-0.138968	0.966888	2344	0.300498	1.00481	1084	-0.439466	2.39668e-32	2.51652e-31	TRUE
AM.6	FOXO1	0.0182317	1.03511	2344	-0.0394235	0.91872	1084	0.0576552	0.101116	0.113755	FALSE
AM.6	HIF1A	-0.0320467	0.993289	2344	0.0692965	1.01135	1084	-0.101343	0.00613057	0.00757306	FALSE
AM.6	HNF4A	0.0555371	1.01162	2344	-0.120091	0.963978	1084	0.175628	1.12187e-06	1.72385e-06	FALSE
AM.6	IRF1	-0.0392772	1.03048	2344	0.0849314	0.925466	1084	-0.124209	0.000435188	0.000559527	FALSE
AM.6	IRF3	0.00634566	1.04119	2344	-0.0137216	0.904861	1084	0.0200673	0.565318	0.603645	FALSE
AM.6	JUN	-0.10688	0.999698	2344	0.231114	0.961272	1084	-0.337995	8.27673e-21	3.47622e-20	TRUE
AM.6	MYB	0.0782296	1.0752	2344	-0.169161	0.788301	1084	0.24739	4.83435e-14	1.12802e-13	TRUE
AM.6	MYC	-0.0257529	1.04353	2344	0.0556871	0.896636	1084	-0.08144	0.0191126	0.0231556	FALSE
AM.6	MYOD1	0.102578	1.01857	2344	-0.22181	0.920776	1084	0.324387	4.16059e-20	1.63823e-19	TRUE
AM.6	NCOA1	-0.0254357	1.04035	2344	0.0550011	0.904644	1084	-0.0804368	0.0211949	0.0251939	FALSE
AM.6	NFE2L2	-0.101088	0.992797	2344	0.218589	0.980834	1084	-0.319677	1.97538e-18	6.91383e-18	TRUE
AM.6	NFIA	0.0394964	1.04834	2344	-0.0854055	0.880929	1084	0.124902	0.000290597	0.000381408	FALSE
AM.6	NFIC	-0.0559309	0.988291	2344	0.120943	1.01483	1084	-0.176874	1.83787e-06	2.70588e-06	FALSE
AM.6	NFKB	-0.133724	0.988017	2344	0.289161	0.9644	1084	-0.422885	2.08859e-31	1.64476e-30	TRUE
AM.6	NFKB1	-0.107401	1.00171	2344	0.232239	0.956336	1084	-0.33964	4.23237e-21	1.90457e-20	TRUE
AM.6	NFYA	-0.18431	0.965635	2344	0.398545	0.956323	1084	-0.582854	6.48452e-58	4.07555e-56	TRUE
AM.6	NR1H3	-0.0880067	1.00629	2344	0.190302	0.959492	1084	-0.278309	1.14877e-14	2.78967e-14	TRUE
AM.6	NR1H4	-0.069931	0.992224	2344	0.151216	1.00048	1084	-0.221147	1.89127e-09	3.50441e-09	TRUE
AM.6	NR3C1	0.00884951	1.04336	2344	-0.0191358	0.899293	1084	0.0279854	0.421265	0.457581	FALSE
AM.6	NRF1	-0.0725481	1.04435	2344	0.156875	0.876793	1084	-0.229423	2.66913e-11	5.42436e-11	TRUE
AM.6	PPARA	-0.110407	0.998128	2344	0.238739	0.962073	1084	-0.349145	4.55617e-22	2.20799e-21	TRUE
AM.6	PPARG	-0.00108611	1.00792	2344	0.00234857	0.983118	1084	-0.00343468	0.924834	0.939751	FALSE
AM.6	RARA	-0.0719148	1.06277	2344	0.155506	0.82788	1084	-0.227421	1.17577e-11	2.46911e-11	TRUE
AM.6	RELA	-0.121052	0.992067	2344	0.261758	0.966859	1084	-0.38281	4.99352e-26	2.6216e-25	TRUE
AM.6	RUNX1	-0.100223	0.988806	2344	0.216718	0.99012	1084	-0.316941	5.60307e-18	1.68092e-17	TRUE
AM.6	RXRA	-0.0250543	1.02049	2344	0.0541764	0.9524	1084	-0.0792307	0.026953	0.0314451	FALSE
AM.6	SP1	-0.0684083	0.98948	2344	0.147924	1.00706	1084	-0.216332	4.75047e-09	8.55085e-09	TRUE
AM.6	SP3	-0.0223823	1.02588	2344	0.0483986	0.940251	1084	-0.0707808	0.0466624	0.0534497	FALSE
AM.6	SPI1	-0.0578955	0.998872	2344	0.125191	0.991392	1084	-0.183087	5.71777e-07	9.00549e-07	FALSE
AM.6	SREBF1	-0.0641788	1.01582	2344	0.138778	0.95066	1084	-0.202957	1.46781e-08	2.56867e-08	TRUE
AM.6	STAT1	-0.0538347	1.02027	2344	0.11641	0.944716	1084	-0.170245	1.84687e-06	2.70588e-06	FALSE
AM.6	STAT3	-0.0998605	1.00112	2344	0.215934	0.963224	1084	-0.315795	2.39798e-18	7.9512e-18	TRUE
AM.6	STAT5A	0.04673	1.02681	2344	-0.101047	0.931888	1084	0.147777	3.04742e-05	4.17364e-05	FALSE
AM.6	STAT5B	-0.13352	0.982953	2344	0.288718	0.975723	1084	-0.422237	6.0027e-31	4.20189e-30	TRUE
AM.6	STAT6	-0.101543	1.01251	2344	0.219573	0.935893	1084	-0.321115	1.93611e-19	7.17498e-19	TRUE
AM.6	TFAP2A	-0.0949271	1.03501	2344	0.205267	0.886071	1084	-0.300194	4.47658e-18	1.41012e-17	TRUE
AM.6	TP53	0.00198336	1.04565	2344	-0.00428873	0.893802	1084	0.00627209	0.856539	0.884622	FALSE
AM.6	TP63	-0.00301847	1.02184	2344	0.00652702	0.95148	1084	-0.00954549	0.789694	0.829179	FALSE
AM.6	TP73	-0.0854052	0.985728	2344	0.184677	1.00614	1084	-0.270082	2.73591e-13	5.94352e-13	TRUE
AM.6	USF1	0.0611447	1.01582	2344	-0.132217	0.952017	1084	0.193362	6.88342e-08	1.11194e-07	FALSE
AM.6	WT1	0.04688	1.03494	2344	-0.101372	0.912164	1084	0.148252	2.35632e-05	3.29885e-05	FALSE
AM.6	YY1	-0.0694609	1.03735	2344	0.1502	0.896254	1084	-0.219661	2.72041e-10	5.35582e-10	TRUE
AM.7	AP1	-0.0201042	1.02226	1204	0.0366195	0.957805	661	-0.0567237	0.23256	0.279072	FALSE
AM.7	AR	-0.0453107	1.01692	1204	0.0825327	0.96372	661	-0.127843	0.00729719	0.0116755	FALSE
AM.7	ATF3	0.047412	1.02334	1204	-0.0863602	0.950723	661	0.133772	0.00474548	0.00786173	FALSE
AM.7	BCL6	0.0109618	1.03704	1204	-0.0199667	0.929174	661	0.0309285	0.509683	0.568948	FALSE
AM.7	CEBPA	0.00184235	1.04357	1204	-0.00335581	0.916085	661	0.00519816	0.911248	0.930637	FALSE
AM.7	CEBPB	0.0564564	0.98502	1204	-0.102834	1.01946	661	0.159291	0.00111731	0.00233178	FALSE
AM.7	CEBPG	-0.138159	1.01541	1204	0.251654	0.920139	661	-0.389813	7.9762e-17	7.65715e-16	TRUE
AM.7	CREB1	-0.164369	0.992737	1204	0.299395	0.942781	661	-0.463764	1.11291e-22	5.34197e-21	TRUE
AM.7	CTNNB1	-0.0484498	1.02662	1204	0.0882505	0.943973	661	-0.1367	0.00379909	0.00675394	FALSE
AM.7	CUX1	-0.0682646	1.04212	1204	0.124343	0.905962	661	-0.192607	3.36024e-05	0.000100807	FALSE
AM.7	E2F1	0.0392666	1.04502	1204	-0.0715235	0.908723	661	0.11079	0.0171606	0.0242267	FALSE
AM.7	EGR1	-0.0435483	1.01132	1204	0.0793225	0.974802	661	-0.122871	0.0102939	0.0154409	FALSE
AM.7	EPAS1	-0.0193135	0.998119	1204	0.0351791	1.00322	661	-0.0544926	0.261177	0.298912	FALSE
AM.7	ESR1	0.027646	1.01498	1204	-0.0503566	0.970858	661	0.0780026	0.10269	0.133219	FALSE
AM.7	ESR2	-0.0899679	1.00463	1204	0.163875	0.971041	661	-0.253843	1.11934e-07	4.47734e-07	TRUE
AM.7	ETS1	-0.0479062	1.01122	1204	0.0872603	0.973941	661	-0.135166	0.0047498	0.00786173	FALSE
AM.7	EZH2	-0.147478	1.0096	1204	0.268629	0.924345	661	-0.416108	7.03543e-19	8.44252e-18	TRUE
AM.7	FOS	-0.150829	1.00478	1204	0.274732	0.931105	661	-0.425561	1.47269e-19	2.3563e-18	TRUE
AM.7	FOXO1	0.0946615	0.999713	1204	-0.172424	0.977977	661	0.267086	2.62391e-08	1.39942e-07	TRUE
AM.7	HIF1A	0.00804067	0.985781	1204	-0.0146459	1.02599	661	0.0226866	0.643351	0.701838	FALSE
AM.7	IRF1	-0.089365	1.00743	1204	0.162777	0.966041	661	-0.252142	1.2728e-07	4.69957e-07	TRUE
AM.7	JUN	0.000827236	1.02264	1204	-0.0015068	0.958148	661	0.00233403	0.960827	0.960827	FALSE
AM.7	MYB	-0.0589827	1.00979	1204	0.107436	0.97352	661	-0.166419	0.000507848	0.00110803	FALSE
AM.7	MYC	0.105072	1.03817	1204	-0.191386	0.896042	661	0.296458	1.45596e-10	9.98374e-10	TRUE
AM.7	NFE2L2	-0.121806	0.977267	1204	0.221868	1.00353	661	-0.343675	1.5311e-12	1.22488e-11	TRUE
AM.7	NFKB	-0.0506253	1.0253	1204	0.092213	0.946005	661	-0.142838	0.00251508	0.00464322	FALSE
AM.7	NFKB1	-0.0665726	1.03524	1204	0.121261	0.920856	661	-0.187834	5.87188e-05	0.000165794	FALSE
AM.7	NR1H2	-0.0443732	1.0234	1204	0.0808249	0.951359	661	-0.125198	0.00823838	0.0127562	FALSE
AM.7	NR1H3	-0.0762133	1.00929	1204	0.138821	0.968301	661	-0.215035	6.74125e-06	2.1572e-05	TRUE
AM.7	NR3C1	-0.0406479	1.00944	1204	0.0740395	0.979001	661	-0.114687	0.0168281	0.0242267	FALSE
AM.7	NRF1	-0.0812715	1.01247	1204	0.148035	0.960092	661	-0.229306	1.45014e-06	4.97192e-06	TRUE
AM.7	PGR	-0.0914273	0.98591	1204	0.166533	1.00474	661	-0.25796	1.09755e-07	4.47734e-07	TRUE
AM.7	PITX2	-0.0546604	0.997146	1204	0.0995629	0.998261	661	-0.154223	0.00144204	0.00276872	FALSE
AM.7	PPARA	-0.0191244	1.00903	1204	0.0348348	0.983141	661	-0.0539591	0.261548	0.298912	FALSE
AM.7	PPARG	0.0271077	0.999218	1204	-0.0493762	1.00029	661	0.0764838	0.114318	0.144402	FALSE
AM.7	RARA	0.00678974	1.05419	1204	-0.0123674	0.893524	661	0.0191571	0.678196	0.723409	FALSE
AM.7	RELA	-0.0660064	1.0348	1204	0.12023	0.921962	661	-0.186236	6.84037e-05	0.00018241	FALSE
AM.7	RUNX1	-0.0646216	1.01222	1204	0.117707	0.96705	661	-0.182329	0.000133543	0.000337372	FALSE
AM.7	SP1	0.024978	0.971395	1204	-0.0454969	1.04933	661	0.0704749	0.154707	0.190409	FALSE
AM.7	SP3	0.0968382	1.04465	1204	-0.176389	0.887052	661	0.273227	2.98998e-09	1.79399e-08	TRUE
AM.7	SPI1	-0.0379778	1.02474	1204	0.0691758	0.950146	661	-0.107154	0.0236556	0.032442	FALSE
AM.7	STAT1	0.0592776	1.0458	1204	-0.107973	0.901474	661	0.167251	0.000307346	0.000702505	FALSE
AM.7	STAT3	-0.062408	1.03026	1204	0.113675	0.932473	661	-0.176083	0.000178902	0.000429365	FALSE
AM.7	STAT5A	0.0529953	1.0362	1204	-0.0965301	0.923427	661	0.149525	0.00139759	0.00276872	FALSE
AM.7	TCF7L2	0.0894494	1.0158	1204	-0.162931	0.949877	661	0.25238	1.00012e-07	4.47734e-07	TRUE
AM.7	TFAP2A	-0.155681	1.01013	1204	0.283571	0.916325	661	-0.439252	5.41984e-21	1.30076e-19	TRUE
AM.7	TP53	-0.0052229	0.99214	1204	0.00951342	1.01485	661	-0.0147363	0.76244	0.79559	FALSE
AM.7	ZBTB16	-0.0287164	1.03565	1204	0.0523065	0.930045	661	-0.081023	0.0842616	0.112349	FALSE
AM.8	AHR	-0.0497469	0.983356	304	0.110387	1.03106	137	-0.160134	0.127039	0.161241	FALSE
AM.8	AP1	-0.0751738	1.0132	304	0.166809	0.952616	137	-0.241983	0.0161745	0.0394156	FALSE
AM.8	AR	-0.00885361	0.997862	304	0.019646	1.00812	137	-0.0284996	0.783077	0.833587	FALSE
AM.8	ATF3	-0.0719867	0.968973	304	0.159737	1.05175	137	-0.231724	0.0292353	0.0482382	FALSE
AM.8	BCL6	0.080285	1.00539	304	-0.178151	0.967931	137	0.258436	0.0109022	0.0327065	FALSE
AM.8	CEBPA	-0.00645058	1.03792	304	0.0143137	0.913722	137	-0.0207643	0.832636	0.833587	FALSE
AM.8	CEBPB	-0.101173	0.993333	304	0.224501	0.981484	137	-0.325674	0.0014783	0.00813064	TRUE
AM.8	CEBPG	-0.138622	0.992803	304	0.307599	0.949232	137	-0.446221	9.92732e-06	0.000194104	TRUE
AM.8	CREB1	-0.0578541	0.98178	304	0.128377	1.03137	137	-0.186231	0.0761369	0.114205	FALSE
AM.8	E2F1	-0.0976653	0.978509	304	0.216717	1.01659	137	-0.314383	0.0026117	0.0123123	FALSE
AM.8	EGR1	-0.111927	0.958185	304	0.248363	1.04864	137	-0.360289	0.000714498	0.00471569	TRUE
AM.8	ESR1	0.0300749	1.00916	304	-0.0667355	0.979715	137	0.0968104	0.342299	0.418365	FALSE
AM.8	ETS1	-0.0758081	1.00268	304	0.168217	0.976759	137	-0.244025	0.0167218	0.0394156	FALSE
AM.8	FOS	-0.123222	1.01557	304	0.273426	0.910043	137	-0.396648	5.75522e-05	0.000633074	TRUE
AM.8	FOXO1	0.0116235	1.0151	304	-0.0257924	0.968798	137	0.0374159	0.711862	0.783048	FALSE
AM.8	FOXO3	0.00632167	1.04801	304	-0.0140277	0.887685	137	0.0203493	0.833587	0.833587	FALSE
AM.8	JUN	-0.0699986	1.04083	304	0.155325	0.886826	137	-0.225324	0.0201409	0.0410578	FALSE
AM.8	MYC	-0.0704233	1.0239	304	0.156268	0.929453	137	-0.226691	0.0224385	0.0411373	FALSE
AM.8	NFE2L2	-0.063179	1.01165	304	0.140193	0.962504	137	-0.203372	0.0442757	0.069576	FALSE
AM.8	NFKB	-0.133999	1.0131	304	0.297341	0.905208	137	-0.43134	1.17639e-05	0.000194104	TRUE
AM.8	NFKB1	-0.0902784	1.01325	304	0.200326	0.94301	137	-0.290604	0.00372177	0.0153523	FALSE
AM.8	PPARA	-0.0758353	1.02946	304	0.168277	0.912573	137	-0.244112	0.013108	0.0360471	FALSE
AM.8	PPARG	0.015918	1.01343	304	-0.0353217	0.972264	137	0.0512397	0.613679	0.723265	FALSE
AM.8	RELA	-0.0863028	1.0267	304	0.191504	0.912792	137	-0.277807	0.00478533	0.0157916	FALSE
AM.8	RUNX1	-0.0501353	1.01041	304	0.111249	0.970905	137	-0.161384	0.111896	0.153858	FALSE
AM.8	SP1	-0.0523953	0.998141	304	0.116264	0.997935	137	-0.168659	0.101722	0.145949	FALSE
AM.8	SP3	-0.0501102	0.998118	304	0.111193	0.998832	137	-0.161304	0.117683	0.155342	FALSE
AM.8	SPI1	-0.110597	1.00893	304	0.245412	0.937753	137	-0.35601	0.000373032	0.00307751	TRUE
AM.8	STAT1	-0.014933	1.00064	304	0.033136	1.00144	137	-0.048069	0.641189	0.729629	FALSE
AM.8	STAT3	-0.0892441	1.00309	304	0.198031	0.96761	137	-0.287275	0.00467465	0.0157916	FALSE
AM.8	TFAP2A	0.0734767	0.998354	304	-0.163043	0.987844	137	0.23652	0.021151	0.0410578	FALSE
AM.8	TP53	-0.073638	0.976377	304	0.163401	1.03555	137	-0.237039	0.0244441	0.0424556	FALSE
AM.8	TP63	-0.0753051	0.995623	304	0.1671	0.99298	137	-0.242406	0.018491	0.0406802	FALSE
DC.9	AP1	0.029679	1.03768	283	-0.037834	0.950789	222	0.067513	0.447206	0.447206	FALSE
DC.9	JUN	0.112867	1.04187	283	-0.14388	0.926456	222	0.256747	0.00359661	0.00959095	TRUE
DC.9	MYC	0.041763	1.00208	283	-0.0532384	0.997059	222	0.0950013	0.289499	0.330856	FALSE
DC.9	NFKB	0.0715572	0.99611	283	-0.0912194	0.999759	222	0.162777	0.0695521	0.111283	FALSE
DC.9	NFKB1	0.218694	1.09818	283	-0.278785	0.776111	222	0.497479	4.86811e-09	3.89449e-08	TRUE
DC.9	RELA	0.0648761	1.06682	283	-0.0827024	0.903343	222	0.147578	0.0931745	0.124233	FALSE
DC.9	SP1	0.123253	1.08526	283	-0.15712	0.856389	222	0.280374	0.00125285	0.00501138	TRUE
DC.9	TP53	0.0942014	1.06168	283	-0.120086	0.903549	222	0.214287	0.0146949	0.0293898	FALSE
a) T/F indicating if the difference of mean TF-scores between the two groups reached the singificance thresholds (FDR < 0.01 and absolute mean difference > 0.2.
* 6h non-infected cells
FDR: false discovery rate, SD: standard deviation, TF: transcription factor.
