# Supplementary material for: Mycobacterium tuberculosis resisters despite HIV exhibit activated T cells and macrophages in their pulmonary alveoli
Source: Research Square preprint supplement (doi:10.21203/rs.3.rs-3889020/v1), 2024-01-31
Supplement: Supplementary file 5 [file 9f4d8ba58fa8da18e0c74cef.xlsx]

## Sheet: Table S1
Supplementary Table 1. BAL scRNA-seq libraries information.
Library info					BAL collection		in vitro experiment info					scRNA-seq and raw data						After pre-processing filters				Samples used for each data analysis
#	Group	Subject	Library	Condition	BAL date	BAL note	Hours incubation	Mtb challenge	Culture Date	% dead cells	# cells in BAL	Sequencer	SEQ batch	Method	# cells (CellRanger output)	% lymphocytes in BAL: by library (dead+live)	% lymphocytes in BAL: avg by subject (dead+live)	# cells (pass filter)	% pass filter	% lymphocytes in BAL (High qual live cells)	% lymphocytes in BAL: avg by subject (High qual live cells) Fig 1	Integration (all cells)	Re-integration and clustering of AM/DC subset	AM/DC clusters: Pseudobulk DE analyses in the absence of Mtb (regressing-out the effect of infection and time of incubation): "RES vs LTBI" and "lymphocytosis" analyses	AM/DC clusters: Mtb response at 6h and 24h	Transcription factor activity, cell-cell communication (only MtbNEG.6h)	Re-integration and clustering of lymphocyte subset	Lymphocyte clusters: Baseline DE analysis in the SC data (only MtbNEG.6h)	Lymphocyte clusters: Mtb response at 6h and 24h
1	LTBI	2RTB0014	2RTB0014_LTBI_MtbNEG_7h	MtbNEG.6h	2021-09-01	Normal/ No bleeding	7	MtbNEG	2022-05-31	0.057	8550000	NovaSeq	B1.Jul22	scRNA-seq	7420	0.00431267	0.007	5862	0.790027	0.0052883	0.007	Included	Included	Included	Included (6h)	Included	Excluded (not enough cells for running the integration)	NA	NA
2	LTBI	2RTB0014	2RTB0014_LTBI_MtbINF_7h	MtbINF.6h	2021-09-01	Normal/ No bleeding	7	MtbINF	2022-05-31	0.058	8550000	NovaSeq	B1.Jul22	scRNA-seq	5160	0.0106589	0.007	4031	0.781202	0.00868271	0.007	Included	Included	Included	Included (6h)	Excluded (not selected condition)	Excluded (not enough cells for running the integration)	Excluded (not selected condition)	NA
3	LTBI	2RTB0014	2RTB0014_LTBI_MtbNEG_30h	MtbNEG.24h	2021-09-01	Normal/ No bleeding	30	MtbNEG	2022-05-31	0.06	8550000	NovaSeq	B1.Jul22	scRNA-seq	5336	0.0088081	0.007	4459	0.835645	0.00852209	0.007	Included	Included	Included	Excluded (30h incubation)	Excluded (not selected condition)	Excluded (not enough cells for running the integration)	Excluded (not selected condition)	Excluded (30h incubation)
4	LTBI	2RTB0014	2RTB0014_LTBI_MtbINF_30h	MtbINF.24h	2021-09-01	Normal/ No bleeding	30	MtbINF	2022-05-31	0.05	8550000	NovaSeq	B1.Jul22	scRNA-seq	4874	0.00533443	0.007	4095	0.840172	0.0041514	0.007	Included	Included	Included	Excluded (30h incubation)	Excluded (not selected condition)	Excluded (not enough cells for running the integration)	Excluded (not selected condition)	Excluded (30h incubation)
5	LTBI	2RTB0092	2RTB0092_LTBI_MtbNEG_6h	MtbNEG.6h	2021-11-03	Contact petechiae/ No bleeding	6	MtbNEG	2022-09-19	0.088	3650000	NovaSeq	B2.Oct22	scRNA-seq	7175	0.0508711	0.048	5409	0.753868	0.0469588	0.044	Included	Included	Included	Included (6h)	Included	Included	Included	Included (6h)
6	LTBI	2RTB0092	2RTB0092_LTBI_MtbINF_6h	MtbINF.6h	2021-11-03	Contact petechiae/ No bleeding	6	MtbINF	2022-09-19	0.093	3650000	NovaSeq	B2.Oct22	scRNA-seq	5993	0.051727	0.048	4458	0.743868	0.0464334	0.044	Included	Included	Included	Included (6h)	Excluded (not selected condition)	Included	Excluded (not selected condition)	Included (6h)
7	LTBI	2RTB0092	2RTB0092_LTBI_MtbNEG_22h	MtbNEG.24h	2021-11-03	Contact petechiae/ No bleeding	22	MtbNEG	2022-09-19	0.138	3650000	NovaSeq	B2.Oct22	scRNA-seq	11176	0.053418	0.048	9221	0.825072	0.0477172	0.044	Included	Included	Included	Included (24h)	Excluded (not selected condition)	Included	Excluded (not selected condition)	Included (24h)
8	LTBI	2RTB0092	2RTB0092_LTBI_MtbINF_22h	MtbINF.24h	2021-11-03	Contact petechiae/ No bleeding	22	MtbINF	2022-09-19	0.255	3650000	NovaSeq	B2.Oct22	scRNA-seq	11723	0.0374478	0.048	7398	0.631067	0.0359557	0.044	Included	Included	Included	Included (24h)	Excluded (not selected condition)	Included	Excluded (not selected condition)	Included (24h)
9	LTBI	2RTB0113	2RTB0113_LTBI_MtbNEG_6h	MtbNEG.6h	2022-02-14	Normal/ No bleeding	6	MtbNEG	2022-08-24	0.079	3700000	NovaSeq	B2.Oct22	scRNA-seq	7942	0.0263158	0.017	6484	0.816419	0.0285318	0.018	Included	Included	Included	Included (6h)	Included	Excluded (not enough cells for running the integration)	NA	NA
10	LTBI	2RTB0113	2RTB0113_LTBI_MtbINF_6h	MtbINF.6h	2022-02-14	Normal/ No bleeding	6	MtbINF	2022-08-24	0.089	3700000	NovaSeq	B2.Oct22	scRNA-seq	7044	0.0235662	0.017	5695	0.808489	0.0251097	0.018	Included	Included	Included	Included (6h)	Excluded (not selected condition)	Excluded (not enough cells for running the integration)	Excluded (not selected condition)	NA
11	LTBI	2RTB0113	2RTB0113_LTBI_MtbNEG_24h	MtbNEG.24h	2022-02-14	Normal/ No bleeding	24	MtbNEG	2022-08-24	0.07	3700000	NovaSeq	B2.Oct22	scRNA-seq	9407	0.00733496	0.017	7220	0.767514	0.00761773	0.018	Included	Included	Included	Included (24h)	Excluded (not selected condition)	Excluded (not enough cells for running the integration)	Excluded (not selected condition)	NA
12	LTBI	2RTB0113	2RTB0113_LTBI_MtbINF_24h	MtbINF.24h	2022-02-14	Normal/ No bleeding	24	MtbINF	2022-08-24	0.112	3700000	NovaSeq	B2.Oct22	scRNA-seq	6159	0.0120149	0.017	5004	0.81247	0.0133893	0.018	Included	Included	Included	Included (24h)	Excluded (not selected condition)	Excluded (not enough cells for running the integration)	Excluded (not selected condition)	NA
13	LTBI	2RTB0148	2RTB0148_LTBI_MtbNEG_6h	MtbNEG.6h	2021-11-03	Multiple anthracotic plaques	6	MtbNEG	2022-09-27	0.027	5700000	NovaSeq	B2.Oct22	scRNA-seq	6938	0.0315653	0.039	5050	0.727875	0.0310891	0.033	Included	Included	Included	Included (6h)	Included	Included	Included	Included (6h)
14	LTBI	2RTB0148	2RTB0148_LTBI_MtbINF_6h	MtbINF.6h	2021-11-03	Multiple anthracotic plaques	6	MtbINF	2022-09-27	0.082	5700000	NovaSeq	B2.Oct22	scRNA-seq	7407	0.0407722	0.039	5695	0.768867	0.0361721	0.033	Included	Included	Included	Included (6h)	Excluded (not selected condition)	Included	Excluded (not selected condition)	Included (6h)
15	LTBI	2RTB0148	2RTB0148_LTBI_MtbNEG_22h	MtbNEG.24h	2021-11-03	Multiple anthracotic plaques	22	MtbNEG	2022-09-27	0.138	5700000	NovaSeq	B2.Oct22	scRNA-seq	8496	0.0348399	0.039	6585	0.775071	0.02612	0.033	Included	Included	Included	Included (24h)	Excluded (not selected condition)	Included	Excluded (not selected condition)	Included (24h)
16	LTBI	2RTB0148	2RTB0148_LTBI_MtbINF_22h	MtbINF.24h	2021-11-03	Multiple anthracotic plaques	22	MtbINF	2022-09-27	0.181	5700000	NovaSeq	B2.Oct22	scRNA-seq	6975	0.0477419	0.039	4925	0.706093	0.0385787	0.033	Included	Included	Included	Included (24h)	Excluded (not selected condition)	Included	Excluded (not selected condition)	Included (24h)
17	LTBI	2RTB0196	2RTB0196_LTBI_MtbNEG_6h	MtbNEG.6h	2021-08-25	Mild bleeding	6	MtbNEG	2022-05-11	0.045	2900000	NovaSeq	B1.Jul22	scRNA-seq	6685	0.0508601	0.041	5155	0.771129	0.0453928	0.038	Included	Included	Included	Included (6h)	Included	Included	Included	Included (6h)
18	LTBI	2RTB0196	2RTB0196_2_LTBI_AgGE_MtbNEG_6h	MtbNEG.6h	2021-08-25	Mild bleeding	6	MtbNEG	2022-09-07	0.02	4000000	NovaSeq	B2.Oct22	CITE-seq (Cell_Surface_Proteins:human-tbnk-6-color-cocktail-15030 (BioLenged) + FeatureBarcode:Gene_expression)	10995	0.0585721	0.041	8731	0.794088	0.0507387	0.038	Included	Included	Included	Included (6h)	Included	Included	Included	Included (6h)
19	LTBI	2RTB0196	2RTB0196_LTBI_MtbINF_6h	MtbINF.6h	2021-08-25	Mild bleeding	6	MtbINF	2022-05-11	0.1	2900000	NovaSeq	B1.Jul22	scRNA-seq	6686	0.0351481	0.041	5200	0.777745	0.0319231	0.038	Included	Included	Included	Included (6h)	Excluded (not selected condition)	Included	Excluded (not selected condition)	Included (6h)
20	LTBI	2RTB0196	2RTB0196_LTBI_MtbNEG_25h	MtbNEG.24h	2021-08-25	Mild bleeding	25	MtbNEG	2022-05-11	0.04	2900000	NovaSeq	B1.Jul22	scRNA-seq	4634	0.0332326	0.041	3879	0.837074	0.0283578	0.038	Included	Included	Included	Included (24h)	Excluded (not selected condition)	Included	Excluded (not selected condition)	Included (24h)
21	LTBI	2RTB0196	2RTB0196_LTBI_MtbINF_25h	MtbINF.24h	2021-08-25	Mild bleeding	25	MtbINF	2022-05-11	0.03	2900000	NovaSeq	B1.Jul22	scRNA-seq	6294	0.026851	0.041	5137	0.816174	0.0218026	0.038	Included	Included	Included	Included (24h)	Excluded (not selected condition)	Included	Excluded (not selected condition)	Included (24h)
22	LTBI	2RTB0205	2RTB0205_LTBI_MtbINF_6h	MtbINF.6h	2021-07-20	Normal/ No bleeding	6	MtbINF	2022-06-20	0.18	4000000	NovaSeq	B1.Jul22	scRNA-seq	5447	0.0268037	0.024	4222	0.775106	0.0319754	0.028	Included	Included	Excluded (no matched MtbNEG.6h)	Excluded (no matched MtbNEG.6h)	Excluded (not selected condition)	Excluded (not enough cells for running the integration)	Excluded (not selected condition)	Excluded (no matched MtbNEG.6h)
23	LTBI	2RTB0205	2RTB0205_LTBI_MtbNEG_22h	MtbNEG.24h	2021-07-20	Normal/ No bleeding	23	MtbNEG	2022-06-20	0.33	4000000	NovaSeq	B1.Jul22	scRNA-seq	2741	0.023714	0.024	2241	0.817585	0.0245426	0.028	Included	Included	Included	Included (24h)	Excluded (not selected condition)	Excluded (not enough cells for running the integration)	Excluded (not selected condition)	NA
24	LTBI	2RTB0205	2RTB0205_LTBI_MtbINF_22h	MtbINF.24h	2021-07-20	Normal/ No bleeding	23	MtbINF	2022-06-20	0.388	4000000	NovaSeq	B1.Jul22	scRNA-seq	2490	0.0216867	0.024	1943	0.780321	0.0241894	0.028	Included	Included	Included	Included (24h)	Excluded (not selected condition)	Excluded (not enough cells for running the integration)	Excluded (not selected condition)	NA
25	LTBI	2RTB0215	2RTB0215_LTBI_MtbNEG_6h	MtbNEG.6h	2021-11-03	Collapse of large airways	6	MtbNEG	2022-08-22	0.045	3600000	NovaSeq	B2.Oct22	scRNA-seq	7271	0.0495118	0.038	5798	0.797414	0.0491549	0.037	Included	Included	Included	Included (6h)	Included	Included	Included	Included (6h)
26	LTBI	2RTB0215	2RTB0215_LTBI_MtbINF_6h	MtbINF.6h	2021-11-03	Collapse of large airways	6	MtbINF	2022-08-22	0.104	3600000	NovaSeq	B2.Oct22	scRNA-seq	7201	0.049021	0.038	5641	0.783363	0.0468002	0.037	Included	Included	Included	Included (6h)	Excluded (not selected condition)	Included	Excluded (not selected condition)	Included (6h)
27	LTBI	2RTB0215	2RTB0215_LTBI_MtbNEG_24h	MtbNEG.24h	2021-11-03	Collapse of large airways	24	MtbNEG	2022-08-22	0.08	3600000	NovaSeq	B2.Oct22	scRNA-seq	8494	0.0257829	0.038	6970	0.820579	0.0266858	0.037	Included	Included	Included	Included (24h)	Excluded (not selected condition)	Included	Excluded (not selected condition)	Included (24h)
28	LTBI	2RTB0215	2RTB0215_LTBI_MtbINF_24h	MtbINF.24h	2021-11-03	Collapse of large airways	24	MtbINF	2022-08-22	0.125	3600000	NovaSeq	B2.Oct22	scRNA-seq	7449	0.0293999	0.038	6021	0.808296	0.0279023	0.037	Included	Included	Included	Included (24h)	Excluded (not selected condition)	Included	Excluded (not selected condition)	Included (24h)
29	Resister	2RTB0058	2RTB0058_RES_MtbNEG_6h	MtbNEG.6h	2021-04-21	No comment	6	MtbNEG	2022-06-08	0.103	7060000	NovaSeq	B1.Jul22	scRNA-seq	5318	0.555472	0.595	3748	0.704776	0.608324	0.625	Included	Included	Included	Included (6h)	Included	Included	Included	Included (6h)
30	Resister	2RTB0058	2RTB0058_RES_MtbINF_6h	MtbINF.6h	2021-04-21	No comment	6	MtbINF	2022-06-08	0.077	7060000	NovaSeq	B1.Jul22	scRNA-seq	8566	0.597595	0.595	6261	0.730913	0.638237	0.625	Included	Included	Included	Included (6h)	Excluded (not selected condition)	Included	Excluded (not selected condition)	Included (6h)
31	Resister	2RTB0058	2RTB0058_RES_MtbNEG_23h	MtbNEG.24h	2021-04-21	No comment	23	MtbNEG	2022-06-08	0.208	7060000	NovaSeq	B1.Jul22	scRNA-seq	3667	0.614944	0.595	2770	0.755386	0.640794	0.625	Included	Included	Included	Included (24h)	Excluded (not selected condition)	Included	Excluded (not selected condition)	Included (24h)
32	Resister	2RTB0058	2RTB0058_RES_MtbINFa_23h	MtbINF.24h	2021-04-21	No comment	23	MtbINF	2022-06-08	0.241	7060000	NovaSeq	B1.Jul22	scRNA-seq	3062	0.612018	0.595	2075	0.677662	0.59759	0.625	Included	Included	Included	Included (24h)	Excluded (not selected condition)	Included	Excluded (not selected condition)	Included (24h)
33	Resister	2RTB0062	2RTB0062_2_RES_AgGE_MtbNEG_2h	MtbNEG.6h	2021-08-25	Mild upper inflammation/ Blood-stained BAL	2	MtbNEG	2022-09-14	0.15	3850000	NovaSeq	B2.Oct22	CITE-seq (Cell_Surface_Proteins:human-tbnk-6-color-cocktail-15030 (BioLenged) + FeatureBarcode:Gene_expression)	8242	0.313516	0.362	5468	0.663431	0.299378	0.406	Included	Included	Excluded (outlier, possib cont)	Excluded (outlier, possib cont)	Excluded (outlier, possib cont)	Included	Excluded (outlier, possib cont)	Excluded (outlier, possib cont)
34	Resister	2RTB0062	2RTB0062_RES_MtbNEG_6h	MtbNEG.6h	2021-08-25	Mild upper inflammation/ Blood-stained BAL	6	MtbNEG	2022-05-24	0.1	2880000	NovaSeq	B1.Jul22	scRNA-seq	4828	0.375518	0.362	2869	0.594242	0.475427	0.406	Included	Included	Excluded (outlier, possib cont)	Excluded (outlier, possib cont)	Excluded (outlier, possib cont)	Included	Excluded (outlier, possib cont)	Excluded (outlier, possib cont)
35	Resister	2RTB0062	2RTB0062_RES_MtbINF_6h	MtbINF.6h	2021-08-25	Mild upper inflammation/ Blood-stained BAL	6	MtbINF	2022-05-24	0.11	2880000	NovaSeq	B1.Jul22	scRNA-seq	5504	0.403343	0.362	3421	0.621548	0.498977	0.406	Included	Included	Excluded (outlier, possib cont)	Excluded (outlier, possib cont)	Excluded (outlier, possib cont)	Included	Excluded (outlier, possib cont)	Excluded (outlier, possib cont)
36	Resister	2RTB0062	2RTB0062_2_RES_MtbNEG_16h	MtbNEG.24h	2021-08-25	Mild upper inflammation/ Blood-stained BAL	16	MtbNEG	2022-09-14	0.382	3850000	NovaSeq	B2.Oct22	scRNA-seq	5817	0.383875	0.362	4059	0.697782	0.403548	0.406	Included	Included	Excluded (outlier, possib cont)	Excluded (outlier, possib cont)	Excluded (outlier, possib cont)	Included	Excluded (outlier, possib cont)	Excluded (outlier, possib cont)
37	Resister	2RTB0062	2RTB0062_2_RES_MtbINF_16h	MtbINF.24h	2021-08-25	Mild upper inflammation/ Blood-stained BAL	16	MtbINF	2022-09-14	0.43	3850000	NovaSeq	B2.Oct22	scRNA-seq	2594	0.387433	0.362	1808	0.696993	0.444137	0.406	Included	Included	Excluded (outlier, possib cont)	Excluded (outlier, possib cont)	Excluded (outlier, possib cont)	Included	Excluded (outlier, possib cont)	Excluded (outlier, possib cont)
38	Resister	2RTB0183	2RTB0183_RES_MtbNEG_6h	MtbNEG.6h	2021-10-06	Normal/ No bleeding	6	MtbNEG	2022-08-17	0.196	7050000	NovaSeq	B2.Oct22	scRNA-seq	6293	0.105355	0.105	4681	0.743842	0.10062	0.1	Included	Included	Included	Included (6h)	Included	Included	Included	Included (6h)
39	Resister	2RTB0183	2RTB0183_RES_MtbINF_6h	MtbINF.6h	2021-10-06	Normal/ No bleeding	6	MtbINF	2022-08-17	0.163	7050000	NovaSeq	B2.Oct22	scRNA-seq	7761	0.0883907	0.105	5793	0.746424	0.0851027	0.1	Included	Included	Included	Included (6h)	Excluded (not selected condition)	Included	Excluded (not selected condition)	Included (6h)
40	Resister	2RTB0183	2RTB0183_RES_MtbNEG_24h	MtbNEG.24h	2021-10-06	Normal/ No bleeding	24	MtbNEG	2022-08-17	0.327	7050000	NovaSeq	B2.Oct22	scRNA-seq	3754	0.112413	0.105	2788	0.742674	0.107963	0.1	Included	Included	Included	Included (24h)	Excluded (not selected condition)	Included	Excluded (not selected condition)	Included (24h)
41	Resister	2RTB0183	2RTB0183_RES_MtbINF_24h	MtbINF.24h	2021-10-06	Normal/ No bleeding	24	MtbINF	2022-08-17	0.248	7050000	NovaSeq	B2.Oct22	scRNA-seq	5400	0.114815	0.105	4092	0.757778	0.110948	0.1	Included	Included	Included	Included (24h)	Excluded (not selected condition)	Included	Excluded (not selected condition)	Included (24h)
42	Resister	2RTB0209	2RTB0209_RES_MtbNEG_6h	MtbNEG.6h	2021-09-22	Collapse of large airways/ Contact bleeding	6	MtbNEG	2022-08-29	0.1	5300000	NovaSeq	B2.Oct22	scRNA-seq	6680	0.0450599	0.047	4915	0.735778	0.034588	0.04	Included	Included	Included	Included (6h)	Included	Included	Included	Included (6h)
43	Resister	2RTB0209	2RTB0209_RES_MtbINF_6h	MtbINF.6h	2021-09-22	Collapse of large airways/ Contact bleeding	6	MtbINF	2022-08-29	0.065	5300000	NovaSeq	B2.Oct22	scRNA-seq	5596	0.0595068	0.047	4251	0.75965	0.0552811	0.04	Included	Included	Included	Included (6h)	Excluded (not selected condition)	Included	Excluded (not selected condition)	Included (6h)
44	Resister	2RTB0209	2RTB0209_RES_MtbNEG_22h	MtbNEG.24h	2021-09-22	Collapse of large airways/ Contact bleeding	22	MtbNEG	2022-08-29	0.126	5300000	NovaSeq	B2.Oct22	scRNA-seq	7386	0.0385865	0.047	5842	0.790956	0.0349195	0.04	Included	Included	Included	Included (24h)	Excluded (not selected condition)	Included	Excluded (not selected condition)	Included (24h)
45	Resister	2RTB0209	2RTB0209_RES_MtbINF_22h	MtbINF.24h	2021-09-22	Collapse of large airways/ Contact bleeding	22	MtbINF	2022-08-29	0.174	5300000	NovaSeq	B2.Oct22	scRNA-seq	7059	0.0436322	0.047	5542	0.785097	0.0382533	0.04	Included	Included	Included	Included (24h)	Excluded (not selected condition)	Included	Excluded (not selected condition)	Included (24h)
46	Resister	2RTB0224	2RTB0224_RES_MtbNEG_6h	MtbNEG.6h	2021-07-14	Normal/ No bleeding	6	MtbNEG	2022-07-04	0.313	5180000	NovaSeq	B1.Jul22	scRNA-seq	5373	NA	NA	Excluded (high % of dead-cells)	0	NA	NA	Excluded (high % of dead-cells)	Excluded (high % of dead-cells)	Excluded (high % of dead-cells)	Excluded (high % of dead-cells)	Excluded (high % of dead-cells)	Excluded (high % of dead-cells)	Excluded (high % of dead-cells)	Excluded (high % of dead-cells)
47	Resister	2RTB0224	2RTB0224_RES_MtbINF_6h	MtbINF.6h	2021-07-14	Normal/ No bleeding	6	MtbINF	2022-07-04	0.303	5180000	NovaSeq	B1.Jul22	scRNA-seq	4453	NA	NA	Excluded (high % of dead-cells)	0	NA	NA	Excluded (high % of dead-cells)	Excluded (high % of dead-cells)	Excluded (high % of dead-cells)	Excluded (high % of dead-cells)	Excluded (high % of dead-cells)	Excluded (high % of dead-cells)	Excluded (high % of dead-cells)	Excluded (high % of dead-cells)
48	Resister	2RTB0224	2RTB0224_RES_MtbNEG_22h	MtbNEG.24h	2021-07-14	Normal/ No bleeding	22	MtbNEG	2022-07-04	0.532	5180000	NovaSeq	B1.Jul22	scRNA-seq	1813	NA	NA	Excluded (high % of dead-cells)	0	NA	NA	Excluded (high % of dead-cells)	Excluded (high % of dead-cells)	Excluded (high % of dead-cells)	Excluded (high % of dead-cells)	Excluded (high % of dead-cells)	Excluded (high % of dead-cells)	Excluded (high % of dead-cells)	Excluded (high % of dead-cells)
49	Resister	2RTB0224	2RTB0224_RES_MtbINF_22h	MtbINF.24h	2021-07-14	Normal/ No bleeding	22	MtbINF	2022-07-04	0.697	5180000	NovaSeq	B1.Jul22	scRNA-seq	1936	NA	NA	Excluded (high % of dead-cells)	0	NA	NA	Excluded (high % of dead-cells)	Excluded (high % of dead-cells)	Excluded (high % of dead-cells)	Excluded (high % of dead-cells)	Excluded (high % of dead-cells)	Excluded (high % of dead-cells)	Excluded (high % of dead-cells)	Excluded (high % of dead-cells)
50	Resister	2RTB0253	2RTB0253_RES_MtbNEG_6h	MtbNEG.6h	2021-04-07	Very inflammed mucosa	6	MtbNEG	2022-09-01	0.184	4700000	NovaSeq	B2.Oct22	scRNA-seq	5373	0.18928	0.177	3324	0.618649	0.213899	0.201	Included	Included	Included	Included (6h)	Included	Included	Included	Included (6h)
51	Resister	2RTB0253	2RTB0253_RES_MtbINF_6h	MtbINF.6h	2021-04-07	Very inflammed mucosa	6	MtbINF	2022-09-01	0.163	4700000	NovaSeq	B2.Oct22	scRNA-seq	6022	0.159748	0.177	4044	0.671538	0.178289	0.201	Included	Included	Included	Included (6h)	Excluded (not selected condition)	Included	Excluded (not selected condition)	Included (6h)
52	Resister	2RTB0253	2RTB0253_RES_MtbNEG_22h	MtbNEG.24h	2021-04-07	Very inflammed mucosa	22	MtbNEG	2022-09-01	0.244	4700000	NovaSeq	B2.Oct22	scRNA-seq	5060	0.217984	0.177	3659	0.723123	0.232031	0.201	Included	Included	Included	Included (24h)	Excluded (not selected condition)	Included	Excluded (not selected condition)	Included (24h)
53	Resister	2RTB0253	2RTB0253_RES_MtbINF_22h	MtbINF.24h	2021-04-07	Very inflammed mucosa	22	MtbINF	2022-09-01	0.367	4700000	NovaSeq	B2.Oct22	scRNA-seq	1840	0.13913	0.177	1102	0.598913	0.140653	0.201	Included	Included	Included	Included (24h)	Excluded (not selected condition)	Included	Excluded (not selected condition)	Included (24h)
54	Resister	2RTB0269	2RTB0269_RES_MtbNEG_6h	MtbNEG.6h	2021-06-30	No comment	6	MtbNEG	2022-09-05	0.059	1490000	NovaSeq	B2.Oct22	scRNA-seq	6170	0.162561	0.116	4538	0.735494	0.167915	0.115	Included	Included	Included	Included (6h)	Included	Included	Included	Included (6h)
55	Resister	2RTB0269	2RTB0269_RES_MtbINF_6h	MtbINF.6h	2021-06-30	No comment	6	MtbINF	2022-09-05	0.037	1490000	NovaSeq	B2.Oct22	scRNA-seq	9113	0.128169	0.116	6929	0.760342	0.128013	0.115	Included	Included	Included	Included (6h)	Excluded (not selected condition)	Included	Excluded (not selected condition)	Included (6h)
56	Resister	2RTB0269	2RTB0269_RES_MtbNEG_22h	MtbNEG.24h	2021-06-30	No comment	22	MtbNEG	2022-09-05	0.089	1490000	NovaSeq	B2.Oct22	scRNA-seq	9592	0.0701626	0.116	6750	0.703711	0.0788148	0.115	Included	Included	Included	Included (24h)	Excluded (not selected condition)	Included	Excluded (not selected condition)	Included (24h)
57	Resister	2RTB0269	2RTB0269_RES_MtbINF_22h	MtbINF.24h	2021-06-30	No comment	22	MtbINF	2022-09-05	0.132	1490000	NovaSeq	B2.Oct22	scRNA-seq	5698	0.101439	0.116	4413	0.774482	0.0974394	0.115	Included	Included	Included	Included (24h)	Excluded (not selected condition)	Included	Excluded (not selected condition)	Included (24h)
AM: Alveolar macrophages; BAL: Bronchoalveolar lavage; DC: Dendritic cells; DE: Differential expression; Mtb: Mycobacterium tuberculosis; MtbINF: Mtb infected; MtbNEG: Mtb non-infected NA: not-available; Possib cont: Possible contamination; SC: Single-cell SEQ: Sequencing; #: number.
