# Supplementary material for: Mycobacterium tuberculosis resisters despite HIV exhibit activated T cells and macrophages in their pulmonary alveoli
Source: Research Square preprint supplement (doi:10.21203/rs.3.rs-3889020/v1), 2024-01-31
Supplement: Supplementary file 6 [file c08464c91c29e26d0cd0690b.xlsx]

## Sheet: Table S2
Supplementary Table 2. Cell populations in PBMC from resisters and LTBI by flow cytometry and CD4+/CD8+ T cell ratio in PBMC and BAL.
		FSC SSC % Cell populations			CD marker % Cell populations								CD4+/CD8+ T cell ratio
Subject	Group	Lymphocytes (% of total PBMC)	Monocytes (% of total PBMC)	Granulocytes (% of total PBMC)	CD3+ (% of total PBMC)	CD3+ (% of Lymphocyte gate)	CD4+ (% of CD3+)	CD8+ (% of CD3+)	CD14+ (% of total PBMC)	CD14+ (% of monocytes)	CD19+ (% of total PBMC)	CD19+ (% of lymphocytes)	PBMC (Flow cytometry)	BAL (MtbNEG.6h scRNA-seq)
2RTB0014	LTBI	76	2.33	0.3	64	84	48	49	2	62	2.8	3.64	0.979592	NA
2RTB0092	LTBI	85	2.07	0.25	61	72	41	57	1.5	60	9.4	12	0.719298	0.375
2RTB0113	LTBI	87	1.57	0.3	70	81	72	25	1	31	8	10	2.88	NA
2RTB0148	LTBI	84	2.13	0.26	67	80	65	35	3	69	6.9	8.6	1.85714	1.45283
2RTB0196	LTBI	79	5.6	0.23	58	73	53	47	3.4	75	8.5	10.4	1.12766	0.526316
2RTB0205	LTBI	62	3.7	0.4	45	72	65	34	6.4	76	4.3	7.4	1.91176	NA
2RTB0215	LTBI	74	2.06	0.38	54	73	51	45	1.5	52	9.4	13.16	1.13333	0.51634
2RTB0058	Resister	82	1.66	0.1	73	89	51	47	0.7	42	2.5	3.2	1.08511	0.59434
2RTB0062	Resister	84	3.5	0.32	59	70	34	65	0.3	18	8	9	0.523077	0.704083
2RTB0183	Resister	80	2.3	0.34	63	78	58	38	1.9	54	8.2	10.5	1.52632	0.437499
2RTB0209	Resister	86	1.85	0.09	57	67	50	42	0.4	23	16	21	1.19048	0.584271
2RTB0224	Resister	73	3.4	0.76	63	86	54	43	1.6	60	6	8.7	1.25581	NA
2RTB0253	Resister	86	0.89	0.36	80	92	40	57	0.4	35	4.33	5.3	0.701754	0.409314
2RTB0269	Resister	79	3.75	0.37	35	44	63	34	7.05	79	3.67	4.77	1.85294	0.355263
Wilcoxon P-value (LTBI vs resisters)		0.61	0.8	0.8	0.8	1	0.34	0.65	0.16	0.18	0.56	0.62	0.4557	0.9143
