# Supplementary material for: Mycobacterium tuberculosis resisters despite HIV exhibit activated T cells and macrophages in their pulmonary alveoli
Source: Research Square preprint supplement (doi:10.21203/rs.3.rs-3889020/v1), 2024-01-31
Supplement: Supplementary file 7 [file fb913ccc66fcf8bd85893617.xlsx]

## Sheet: Table S4
Supplementary Table 4. Results from the pseudobulk differential expression analysis of AM and DC clusters between resisters and LTBI in the absence of Mtb (baseline).
	AM.0: Baseline Resisters vs LTBI					AM.1: Baseline Resisters vs LTBI					AM.2: Baseline Resisters vs LTBI					AM.3: Baseline Resisters vs LTBI					MoAM.4: Baseline Resisters vs LTBI					AM.5: Baseline Resisters vs LTBI					AM.6: Baseline Resisters vs LTBI					AM.7: Baseline Resisters vs LTBI					AM.8: Baseline Resisters vs LTBI					DC.9: Baseline Resisters vs LTBI
Gene	Log2FC a	AveExpr b	P.Value c	adj.P.Val d	PASS e	Log2FC a	AveExpr b	P.Value c	adj.P.Val d	PASS e	Log2FC a	AveExpr b	P.Value c	adj.P.Val d	PASS e	Log2FC a	AveExpr b	P.Value c	adj.P.Val d	PASS e	Log2FC a	AveExpr b	P.Value c	adj.P.Val d	PASS e	Log2FC a	AveExpr b	P.Value c	adj.P.Val d	PASS e	Log2FC a	AveExpr b	P.Value c	adj.P.Val d	PASS e	Log2FC a	AveExpr b	P.Value c	adj.P.Val d	PASS e	Log2FC a	AveExpr b	P.Value c	adj.P.Val d	PASS e	Log2FC a	AveExpr b	P.Value c	adj.P.Val d
A1BG	0.474905	4.50156	0.0221945	0.150202	FALSE	0.214107	4.16704	0.234847	0.573366	FALSE	0.211864	4.20199	0.297526	0.666101	FALSE	0.363243	4.35628	0.0349205	0.198419	FALSE	0.391583	4.269	0.0253298	0.162014	FALSE	0.468134	4.57189	0.0308351	0.272724	FALSE	0.328353	4.47348	0.0612056	0.264053	FALSE	0.373858	4.15542	0.0401265	0.244877	FALSE	0.166167	4.81999	0.350367	0.665502	FALSE	NA	NA	NA	NA
A1BG-AS1	-0.546017	2.48743	0.0221108	0.149989	FALSE	-0.212619	2.79406	0.274678	0.614471	FALSE	-0.404372	2.80052	0.0930825	0.450244	FALSE	-0.466867	2.09735	0.035167	0.198563	FALSE	-0.26382	2.80206	0.125575	0.36176	FALSE	-0.392025	2.77357	0.0601767	0.34525	FALSE	-0.271707	2.59294	0.154216	0.415002	FALSE	NA	NA	NA	NA	NA	NA	NA	NA	NA	NA	NA	NA	NA	NA
A2M	0.53242	2.84402	0.143156	0.370488	FALSE	0.436108	2.79156	0.222046	0.562203	FALSE	0.384094	2.86113	0.324947	0.689019	FALSE	0.821386	2.53792	0.00819858	0.101238	FALSE	0.195184	4.59465	0.422808	0.662798	FALSE	NA	NA	NA	NA	NA	0.816514	2.91592	0.0223052	0.169134	FALSE	NA	NA	NA	NA	NA	NA	NA	NA	NA	NA	-0.222499	6.21068	0.587427	0.802771
A4GALT	0.0745247	3.1949	0.887773	0.945762	FALSE	-0.30116	3.16987	0.560286	0.817306	FALSE	-0.020046	3.66824	0.970813	0.992666	FALSE	0.229855	3.29162	0.59467	0.80136	FALSE	NA	NA	NA	NA	NA	0.0431566	3.42156	0.922839	0.977952	FALSE	-0.0486817	3.38212	0.912741	0.963973	FALSE	0.663573	3.19651	0.154808	0.448089	FALSE	NA	NA	NA	NA	NA	NA	NA	NA	NA
AAAS	0.167101	2.57639	0.351446	0.591077	FALSE	0.0431784	2.62166	0.759509	0.912945	FALSE	0.11295	2.45978	0.52572	0.810889	FALSE	0.0108344	2.11317	0.944519	0.979308	FALSE	-0.00513625	2.77111	0.973624	0.987791	FALSE	NA	NA	NA	NA	NA	-0.159081	2.57788	0.346178	0.61373	FALSE	NA	NA	NA	NA	NA	NA	NA	NA	NA	NA	NA	NA	NA	NA
AACS	-0.322763	1.66362	0.0669105	0.250556	FALSE	-0.101801	2.35341	0.445756	0.750318	FALSE	-0.358353	2.04129	0.0424079	0.329645	FALSE	-0.2496	2.58021	0.192365	0.467192	FALSE	NA	NA	NA	NA	NA	NA	NA	NA	NA	NA	NA	NA	NA	NA	NA	NA	NA	NA	NA	NA	NA	NA	NA	NA	NA	NA	NA	NA	NA
AAGAB	-0.188154	3.9156	0.168304	0.402886	FALSE	0.0178484	4.88862	0.851555	0.949649	FALSE	0.0363032	4.47293	0.793032	0.93628	FALSE	-0.270244	3.75902	0.038713	0.207977	FALSE	-0.249921	4.55153	0.0312955	0.17898	FALSE	-0.0726271	4.482	0.583553	0.82021	FALSE	-0.27359	3.87523	0.0404546	0.219492	FALSE	-0.00255663	4.35329	0.983445	0.993197	FALSE	NA	NA	NA	NA	NA	NA	NA	NA	NA
AAK1	-0.08481	6.58326	0.516918	0.722809	FALSE	-0.0760426	7.55904	0.443658	0.749049	FALSE	-0.157839	6.96457	0.184508	0.554094	FALSE	-0.0844531	7.01807	0.55502	0.777894	FALSE	-0.0675654	7.15023	0.474307	0.70058	FALSE	-0.0747979	7.22608	0.532431	0.795524	FALSE	-0.0378237	6.47157	0.755142	0.8883	FALSE	0.115419	6.87065	0.366907	0.667915	FALSE	-0.0325981	7.28869	0.783609	0.916519	FALSE	-0.198336	6.46961	0.243381	0.571323
AAMDC	0.00080238	5.12524	0.995516	0.998042	FALSE	-0.108964	5.02092	0.280615	0.619941	FALSE	-0.174958	4.88905	0.189551	0.558145	FALSE	0.0477749	5.33708	0.701634	0.866836	FALSE	-0.114521	4.48293	0.273501	0.539128	FALSE	0.0586971	5.18491	0.613506	0.835928	FALSE	0.000245779	4.953	0.998308	0.998786	FALSE	0.0220827	5.10639	0.845641	0.945923	FALSE	-0.0385486	5.36618	0.805623	0.926208	FALSE	NA	NA	NA	NA
AAMP	0.348083	4.82245	0.0245456	0.156466	FALSE	0.278172	4.67485	0.0518131	0.318724	FALSE	0.300996	4.60485	0.046523	0.341236	FALSE	0.124949	4.61119	0.28128	0.563291	FALSE	0.153626	4.81999	0.14795	0.391953	FALSE	0.367952	4.72302	0.00636764	0.142458	FALSE	0.251975	4.71531	0.0792766	0.298967	FALSE	0.209007	4.69876	0.086107	0.349124	FALSE	0.263337	5.03525	0.165211	0.49677	FALSE	NA	NA	NA	NA
AAR2	0.142536	3.25303	0.114334	0.328179	FALSE	0.103772	3.73744	0.256311	0.597047	FALSE	0.288927	3.52175	0.0112367	0.21629	FALSE	-0.149852	3.4132	0.303008	0.58458	FALSE	0.0642675	3.74603	0.528181	0.740884	FALSE	0.101823	3.62994	0.411855	0.717021	FALSE	0.196222	3.28421	0.1788	0.447693	FALSE	0.0698547	3.49201	0.557027	0.797904	FALSE	NA	NA	NA	NA	NA	NA	NA	NA	NA
AARS	0.0600444	3.58434	0.703864	0.847323	FALSE	0.0485071	3.9865	0.752265	0.909792	FALSE	0.165628	3.72302	0.35016	0.706027	FALSE	-0.12016	3.00469	0.540009	0.768122	FALSE	-0.181968	3.69618	0.169656	0.419432	FALSE	0.149913	3.84979	0.431367	0.728259	FALSE	-0.310114	3.6037	0.0488882	0.23947	FALSE	-0.129807	3.6774	0.368388	0.668523	FALSE	NA	NA	NA	NA	NA	NA	NA	NA	NA
AARS2	NA	NA	NA	NA	NA	-0.342086	1.5995	0.0217656	0.22869	FALSE	NA	NA	NA	NA	NA	NA	NA	NA	NA	NA	NA	NA	NA	NA	NA	NA	NA	NA	NA	NA	NA	NA	NA	NA	NA	NA	NA	NA	NA	NA	NA	NA	NA	NA	NA	NA	NA	NA	NA
AARSD1	-0.0743742	3.40879	0.541602	0.741994	FALSE	-0.0455173	3.44378	0.692235	0.883948	FALSE	0.0054562	3.27011	0.969872	0.992473	FALSE	-0.174282	3.09818	0.198926	0.474246	FALSE	-0.322439	3.20266	0.0201738	0.145516	FALSE	0.0897832	3.2912	0.568236	0.81212	FALSE	-0.202061	3.36649	0.18386	0.452437	FALSE	-0.126993	3.29935	0.229033	0.536561	FALSE	NA	NA	NA	NA	NA	NA	NA	NA	NA
AASDH	0.074922	3.42854	0.611871	0.789362	FALSE	0.299357	3.94145	0.0184273	0.212712	FALSE	0.142299	3.6371	0.478527	0.785338	FALSE	0.00463622	2.94245	0.979403	0.991002	FALSE	-0.0311041	3.61653	0.796453	0.908856	FALSE	-0.0918872	3.5659	0.597817	0.826956	FALSE	-0.0786412	3.47509	0.591038	0.794888	FALSE	0.0895316	3.61844	0.558353	0.799005	FALSE	NA	NA	NA	NA	NA	NA	NA	NA	NA
AASDHPPT	0.205559	5.1827	0.212121	0.454563	FALSE	0.22625	5.24849	0.0519853	0.318805	FALSE	0.287669	5.26959	0.0959227	0.452824	FALSE	-0.0211214	4.38514	0.889436	0.955236	FALSE	-0.0433491	5.11207	0.708514	0.859038	FALSE	0.196164	5.18506	0.141043	0.473254	FALSE	-0.0412343	5.24934	0.714933	0.865163	FALSE	0.0598724	5.24689	0.55864	0.79903	FALSE	-0.144618	4.83259	0.469239	0.751499	FALSE	NA	NA	NA	NA
AATBC	-0.0289608	3.03565	0.898519	0.951377	FALSE	-0.0321077	3.82337	0.882828	0.959211	FALSE	-0.268723	2.81555	0.405149	0.742612	FALSE	0.0477074	3.09752	0.869822	0.947688	FALSE	NA	NA	NA	NA	NA	0.123156	3.15784	0.677677	0.870298	FALSE	0.056915	2.97919	0.769925	0.897923	FALSE	NA	NA	NA	NA	NA	NA	NA	NA	NA	NA	NA	NA	NA	NA
AATF	-0.232484	5.73294	0.0616528	0.240713	FALSE	-0.04309	6.25206	0.641153	0.861715	FALSE	-0.0117967	6.01627	0.924807	0.980274	FALSE	-0.204679	5.54304	0.0415229	0.213907	FALSE	-0.271819	6.11665	0.00305042	0.054862	TRUE	-0.0618917	5.9438	0.638201	0.849379	FALSE	-0.211824	5.6857	0.0412573	0.22096	FALSE	-0.114763	5.94513	0.307036	0.613597	FALSE	-0.299281	5.97652	0.051274	0.302568	FALSE	-0.477327	5.95298	0.00879394	0.140794
ABAT	0.555372	2.9229	0.0227004	0.151281	FALSE	0.31561	4.01149	0.0979764	0.412406	FALSE	0.373384	3.79838	0.1974	0.567098	FALSE	0.482461	4.19612	0.0211638	0.158261	FALSE	0.135132	4.01078	0.548393	0.755971	FALSE	0.353176	3.89398	0.10047	0.41877	FALSE	0.56533	2.95146	0.00674445	0.103348	FALSE	NA	NA	NA	NA	NA	NA	NA	NA	NA	NA	NA	NA	NA	NA
ABCA1	0.612084	6.31378	0.0523462	0.221481	FALSE	0.694713	6.87726	0.0357654	0.274169	FALSE	0.749193	7.60818	0.00573409	0.167145	FALSE	0.409628	6.7652	0.153887	0.416958	FALSE	0.373508	8.2147	0.0827555	0.293936	FALSE	0.415079	6.44156	0.146908	0.479094	FALSE	0.339765	6.69834	0.105857	0.341641	FALSE	0.639861	6.90983	0.00924876	0.122756	FALSE	0.800352	6.15069	0.0426819	0.283706	FALSE	NA	NA	NA	NA
ABCA5	-0.629035	3.09204	0.0168759	0.131567	FALSE	-0.259409	4.04562	0.23207	0.570273	FALSE	-0.404324	4.34565	0.14534	0.516042	FALSE	-0.256666	3.61731	0.2792	0.561691	FALSE	-0.307324	4.49057	0.141537	0.383885	FALSE	-0.261391	3.97652	0.355311	0.678166	FALSE	-0.411807	3.28614	0.106531	0.342704	FALSE	-0.603096	3.51808	0.0033549	0.0730448	TRUE	NA	NA	NA	NA	NA	-0.185486	6.19258	0.411146	0.68858
ABCA7	-0.449015	1.72634	0.0254463	0.158075	FALSE	-0.481897	2.5352	0.0261876	0.243092	FALSE	-0.56175	1.98898	0.021897	0.269463	FALSE	-0.399187	2.14546	0.0697855	0.280012	FALSE	NA	NA	NA	NA	NA	NA	NA	NA	NA	NA	NA	NA	NA	NA	NA	NA	NA	NA	NA	NA	NA	NA	NA	NA	NA	NA	NA	NA	NA
ABCB10	-0.0920401	3.56211	0.495504	0.707048	FALSE	0.0756536	4.58814	0.431424	0.741273	FALSE	0.0424513	4.20372	0.762676	0.920582	FALSE	-0.255772	3.22393	0.0688026	0.277916	FALSE	-0.230784	3.86322	0.0691873	0.268761	FALSE	-0.108469	4.08968	0.481797	0.763913	FALSE	-0.145179	3.65146	0.266655	0.541015	FALSE	-0.0470243	4.0648	0.743028	0.896127	FALSE	NA	NA	NA	NA	NA	NA	NA	NA	NA
ABCB5	-0.212334	2.98178	0.566654	0.760233	FALSE	-0.204982	3.72685	0.564817	0.819898	FALSE	0.077468	3.50241	0.862486	0.957138	FALSE	-0.206738	2.40853	0.574836	0.790256	FALSE	NA	NA	NA	NA	NA	NA	NA	NA	NA	NA	-0.270524	3.04917	0.424112	0.67368	FALSE	NA	NA	NA	NA	NA	NA	NA	NA	NA	NA	NA	NA	NA	NA
ABCB7	-0.280555	4.13566	0.00693263	0.0860114	TRUE	-0.0271906	4.92109	0.787883	0.922121	FALSE	-0.0603373	4.54392	0.610879	0.852424	FALSE	-0.295117	4.31541	0.0486574	0.232817	FALSE	-0.0271855	4.81194	0.741843	0.879266	FALSE	-0.0563651	4.5112	0.632394	0.846452	FALSE	-0.102844	4.14491	0.318097	0.588601	FALSE	-0.132985	4.4363	0.165996	0.462145	FALSE	-0.186709	4.66522	0.29642	0.620124	FALSE	NA	NA	NA	NA
ABCB8	-0.125966	2.79626	0.254325	0.497562	FALSE	-0.142384	3.17038	0.209156	0.549309	FALSE	-0.136721	2.92058	0.323075	0.68776	FALSE	-0.269411	2.72326	0.0691709	0.279054	FALSE	-0.0217146	3.09896	0.880008	0.946188	FALSE	-0.0285398	2.8114	0.849186	0.945552	FALSE	-0.239296	2.96301	0.0720365	0.287059	FALSE	NA	NA	NA	NA	NA	NA	NA	NA	NA	NA	NA	NA	NA	NA
ABCC1	-0.526536	6.11909	0.0209703	0.145776	FALSE	-0.402595	7.29661	0.0313315	0.261697	FALSE	-0.559547	7.1872	0.0114494	0.216747	FALSE	-0.53556	6.24859	0.010257	0.113307	FALSE	-0.14182	7.65868	0.385367	0.633737	FALSE	-0.272768	7.07608	0.117562	0.444198	FALSE	-0.437749	6.10597	0.0139261	0.141188	FALSE	-0.287663	6.84429	0.116354	0.394692	FALSE	-0.453699	6.41284	0.0137171	0.190341	FALSE	-0.169101	7.687	0.494406	0.742744
ABCC10	-0.105783	2.26117	0.553638	0.75078	FALSE	0.0986307	3.22058	0.431815	0.741464	FALSE	0.193166	2.84359	0.268847	0.64116	FALSE	NA	NA	NA	NA	NA	-0.0206452	3.05529	0.883332	0.947605	FALSE	-0.020502	2.72852	0.916017	0.975342	FALSE	0.0622868	2.39559	0.669843	0.841188	FALSE	NA	NA	NA	NA	NA	NA	NA	NA	NA	NA	NA	NA	NA	NA
ABCC3	-0.692468	5.83287	0.000626111	0.030532	TRUE	-0.476829	6.8936	0.00106776	0.074423	TRUE	-0.552971	6.58955	0.0162446	0.236595	FALSE	-0.672415	5.60103	0.000112851	0.0145262	TRUE	-0.392413	7.17437	0.00707048	0.0857908	TRUE	-0.525877	6.44755	0.00484818	0.128586	FALSE	-0.647832	6.00479	5.12959e-05	0.0101648	TRUE	-0.478668	6.14522	0.00622276	0.100947	FALSE	-0.444834	6.01456	0.0131116	0.187815	FALSE	NA	NA	NA	NA
ABCC4	0.174054	2.08323	0.360773	0.597278	FALSE	0.174549	3.2267	0.290369	0.630701	FALSE	0.222389	2.77418	0.32609	0.690017	FALSE	-0.113004	2.47066	0.644003	0.833017	FALSE	0.132129	2.93924	0.434292	0.671825	FALSE	-0.0509192	2.77722	0.849339	0.945552	FALSE	NA	NA	NA	NA	NA	NA	NA	NA	NA	NA	NA	NA	NA	NA	NA	NA	NA	NA	NA
ABCC5	0.00974447	2.58996	0.957832	0.980246	FALSE	0.129277	3.67261	0.45483	0.757262	FALSE	0.0348664	2.96582	0.885601	0.966307	FALSE	-0.143167	2.72286	0.497299	0.740413	FALSE	-0.00337954	3.48733	0.983419	0.99208	FALSE	-0.283079	3.34469	0.196945	0.537891	FALSE	NA	NA	NA	NA	NA	NA	NA	NA	NA	NA	NA	NA	NA	NA	NA	NA	NA	NA	NA
ABCD1	0.254198	3.7614	0.0771238	0.268735	FALSE	0.205992	4.15676	0.0830981	0.383025	FALSE	0.305257	3.85965	0.0253351	0.28204	FALSE	-0.094745	3.76407	0.52392	0.758764	FALSE	0.25687	4.27377	0.0200626	0.145302	FALSE	0.215258	3.94775	0.171519	0.509286	FALSE	0.204649	3.74348	0.15393	0.414542	FALSE	0.194591	3.99381	0.238097	0.545918	FALSE	NA	NA	NA	NA	NA	NA	NA	NA	NA
ABCD3	-0.111837	4.12588	0.359977	0.59678	FALSE	0.118626	4.87772	0.191174	0.533033	FALSE	-0.044196	4.47639	0.726564	0.906607	FALSE	0.0250198	4.22646	0.877877	0.950447	FALSE	-0.0472546	4.64501	0.684689	0.842746	FALSE	0.00828272	4.61202	0.949738	0.985453	FALSE	-0.170155	4.14078	0.164819	0.428589	FALSE	0.0780329	4.36416	0.51041	0.769144	FALSE	-0.0805544	4.56569	0.658728	0.864198	FALSE	NA	NA	NA	NA
ABCD4	-0.0807737	2.81803	0.540514	0.741127	FALSE	-0.0619168	2.99919	0.604997	0.844188	FALSE	-0.0019575	3.02413	0.988554	0.996098	FALSE	0.151616	2.88633	0.31106	0.593356	FALSE	-0.115977	3.21375	0.326405	0.58781	FALSE	0.00102469	2.92373	0.995805	0.998522	FALSE	-0.114	2.90712	0.405431	0.660616	FALSE	NA	NA	NA	NA	NA	NA	NA	NA	NA	NA	NA	NA	NA	NA
ABCE1	0.286458	5.88331	0.0445925	0.207979	FALSE	0.202894	6.06286	0.0286425	0.251763	FALSE	0.385542	5.93389	0.0030374	0.138168	FALSE	0.183521	5.53164	0.185518	0.459068	FALSE	0.161553	6.04301	0.151886	0.397241	FALSE	0.218935	5.91622	0.0641633	0.352909	FALSE	0.0797064	5.74811	0.495513	0.731696	FALSE	0.127289	5.8615	0.272227	0.577913	FALSE	0.00959094	5.95588	0.947574	0.981665	FALSE	NA	NA	NA	NA
ABCF1	0.0807537	6.53498	0.558142	0.754708	FALSE	0.0525559	6.56265	0.657453	0.870322	FALSE	0.113762	6.66779	0.414855	0.747476	FALSE	-0.0391211	6.42541	0.715931	0.874985	FALSE	0.152984	6.82943	0.155932	0.401384	FALSE	0.0579001	6.57959	0.649015	0.853751	FALSE	0.0038638	6.46673	0.974761	0.991583	FALSE	0.0524316	6.62162	0.634562	0.840955	FALSE	-0.0960871	6.74564	0.522392	0.78629	FALSE	0.212524	6.93097	0.158417	0.473159
ABCF2	0.0058788	3.7859	0.971724	0.986491	FALSE	0.173312	3.85854	0.179086	0.519021	FALSE	0.294253	3.80373	0.107489	0.469488	FALSE	0.118254	3.19021	0.489398	0.7349	FALSE	0.0985008	3.93394	0.473862	0.700277	FALSE	0.0238973	3.7104	0.848104	0.94549	FALSE	-0.105692	3.79457	0.488864	0.727621	FALSE	0.247312	3.79544	0.179329	0.479432	FALSE	NA	NA	NA	NA	NA	NA	NA	NA	NA
ABCF3	-0.0134406	3.49904	0.924624	0.963941	FALSE	0.0739244	3.52287	0.496881	0.783101	FALSE	0.199118	3.40214	0.184901	0.554094	FALSE	-0.0599762	2.90164	0.74573	0.89174	FALSE	0.0140846	3.44267	0.900872	0.956437	FALSE	0.0513094	3.41017	0.742246	0.903818	FALSE	-0.169273	3.56802	0.270997	0.546797	FALSE	0.0625254	3.38483	0.667982	0.857615	FALSE	NA	NA	NA	NA	NA	NA	NA	NA	NA
ABCG1	0.543142	7.46603	0.0114294	0.107598	FALSE	0.379219	8.17673	0.0737981	0.368428	FALSE	0.562316	7.31534	0.0163734	0.236936	FALSE	0.326306	7.68376	0.0839927	0.307789	FALSE	0.149563	6.59555	0.446549	0.680547	FALSE	0.466972	7.43656	0.0190944	0.223127	FALSE	0.11013	7.30432	0.532161	0.754948	FALSE	0.553167	7.43978	0.00212897	0.0612414	TRUE	0.38286	7.97985	0.0836433	0.369129	FALSE	NA	NA	NA	NA
ABCG2	-0.129443	6.20425	0.51856	0.724676	FALSE	0.0590554	6.61197	0.737722	0.903606	FALSE	0.0420819	5.81781	0.837159	0.949221	FALSE	-0.0839674	5.78403	0.59946	0.804014	FALSE	-0.358059	4.64129	0.18795	0.443792	FALSE	-0.0601677	6.22754	0.748662	0.906936	FALSE	-0.0291781	5.91041	0.857979	0.941682	FALSE	0.0871407	6.07362	0.587739	0.816063	FALSE	-0.0025525	6.65695	0.990534	0.997263	FALSE	NA	NA	NA	NA
ABHD10	0.2078	3.06034	0.282887	0.529124	FALSE	0.531007	3.59854	0.00174433	0.0845044	TRUE	0.582909	3.01696	0.035201	0.310504	FALSE	0.0667185	2.40196	0.744687	0.891188	FALSE	-0.00702787	3.02419	0.968036	0.985655	FALSE	0.0168206	3.04504	0.92917	0.980202	FALSE	0.4136	3.08006	0.0401952	0.218281	FALSE	NA	NA	NA	NA	NA	NA	NA	NA	NA	NA	NA	NA	NA	NA
ABHD11	-0.0905204	2.30305	0.642557	0.810113	FALSE	-0.225521	1.93175	0.20209	0.543922	FALSE	-0.117091	2.00712	0.553721	0.826568	FALSE	NA	NA	NA	NA	NA	NA	NA	NA	NA	NA	NA	NA	NA	NA	NA	NA	NA	NA	NA	NA	NA	NA	NA	NA	NA	NA	NA	NA	NA	NA	NA	NA	NA	NA
ABHD12	0.0626086	6.04905	0.657303	0.818767	FALSE	0.0906587	6.5394	0.505214	0.787566	FALSE	0.154723	6.27362	0.387946	0.731522	FALSE	0.0591634	5.79553	0.575722	0.790727	FALSE	-0.104147	6.55644	0.488306	0.711656	FALSE	-0.0362631	6.24165	0.807516	0.929055	FALSE	-0.11846	6.06143	0.354844	0.61952	FALSE	-0.00631623	6.3813	0.963563	0.986176	FALSE	0.296984	6.00709	0.0720638	0.353839	FALSE	0.309679	6.62561	0.170124	0.485491
ABHD13	0.150926	4.258	0.176113	0.412	FALSE	0.17241	4.53107	0.0351559	0.27158	FALSE	0.148394	4.51109	0.183713	0.554059	FALSE	-0.00886372	4.02583	0.947496	0.980189	FALSE	0.0670393	4.63828	0.400277	0.645677	FALSE	0.0903296	4.45531	0.430208	0.727197	FALSE	0.112578	4.22716	0.292475	0.566435	FALSE	0.136178	4.46501	0.148959	0.441998	FALSE	0.218252	4.59391	0.166821	0.497603	FALSE	NA	NA	NA	NA
ABHD14A	-0.267162	3.22341	0.288358	0.534161	FALSE	-0.298383	2.76913	0.189738	0.531292	FALSE	-0.26201	2.62181	0.311301	0.678376	FALSE	-0.095672	2.84769	0.725243	0.879579	FALSE	NA	NA	NA	NA	NA	-0.168385	2.91824	0.453772	0.746308	FALSE	0.000582883	3.21987	0.997468	0.998786	FALSE	NA	NA	NA	NA	NA	NA	NA	NA	NA	NA	NA	NA	NA	NA
ABHD14B	-0.120063	3.83358	0.522424	0.727054	FALSE	-0.370545	3.31865	0.0180882	0.211449	FALSE	-0.311402	3.26222	0.126462	0.491715	FALSE	0.168659	3.57886	0.48118	0.728105	FALSE	-0.202601	2.76418	0.225808	0.491344	FALSE	-0.221037	3.42721	0.289052	0.627637	FALSE	-0.154105	3.7961	0.355579	0.620396	FALSE	-0.346078	3.46168	0.0510807	0.277337	FALSE	NA	NA	NA	NA	NA	NA	NA	NA	NA
ABHD15	0.284104	2.33767	0.0451759	0.208455	FALSE	0.175624	2.6301	0.11656	0.440612	FALSE	0.248663	2.22466	0.176154	0.548733	FALSE	0.179319	2.0945	0.364411	0.640475	FALSE	NA	NA	NA	NA	NA	0.134729	2.53699	0.466669	0.7544	FALSE	0.0734707	2.38869	0.686824	0.850094	FALSE	NA	NA	NA	NA	NA	NA	NA	NA	NA	NA	NA	NA	NA	NA
ABHD15-AS1	0.222672	2.96949	0.454613	0.676922	FALSE	0.126474	4.33601	0.602916	0.843971	FALSE	0.0149513	3.44205	0.953269	0.98851	FALSE	0.0479526	3.5004	0.838979	0.935062	FALSE	-0.028986	3.4027	0.900245	0.956194	FALSE	0.11262	4.01521	0.67458	0.868482	FALSE	0.053944	2.91061	0.846364	0.936937	FALSE	NA	NA	NA	NA	NA	NA	NA	NA	NA	NA	NA	NA	NA	NA
ABHD16A	-0.106386	4.89336	0.51392	0.720774	FALSE	-0.0190878	4.79496	0.887866	0.961885	FALSE	-0.108897	4.70867	0.469095	0.780977	FALSE	-0.106112	4.2208	0.467359	0.717996	FALSE	0.00171348	4.84554	0.988269	0.993786	FALSE	-0.0330817	4.57291	0.833989	0.939928	FALSE	-0.104597	4.8386	0.44176	0.690896	FALSE	-0.015977	5.00078	0.892389	0.963426	FALSE	-0.209976	4.35672	0.279667	0.611375	FALSE	NA	NA	NA	NA
ABHD17A	-0.0619879	4.98795	0.650696	0.814351	FALSE	-0.117125	4.75604	0.269484	0.608982	FALSE	0.0261386	4.77753	0.841683	0.950149	FALSE	-0.0781974	4.53225	0.575419	0.790648	FALSE	0.0527896	4.78331	0.640547	0.818639	FALSE	-0.102339	4.74562	0.424979	0.725273	FALSE	-0.139961	4.99386	0.242474	0.519061	FALSE	-0.0414008	4.93815	0.686739	0.866776	FALSE	0.0422239	4.54307	0.821711	0.933469	FALSE	NA	NA	NA	NA
ABHD17B	-0.215487	3.3247	0.164445	0.398368	FALSE	-0.101897	4.3624	0.438937	0.746647	FALSE	-0.213625	3.98649	0.190707	0.56023	FALSE	0.217194	5.37588	0.275104	0.559598	FALSE	-0.134659	4.48872	0.351129	0.608418	FALSE	-0.066774	4.2509	0.662764	0.862369	FALSE	-0.0486357	3.31892	0.766824	0.895754	FALSE	-0.245703	3.74742	0.100881	0.374756	FALSE	0.172982	4.85882	0.458164	0.745387	FALSE	NA	NA	NA	NA
ABHD18	-0.291582	4.04557	0.114177	0.328179	FALSE	0.00840992	5.20546	0.94477	0.98417	FALSE	-0.0766153	4.85821	0.65533	0.872168	FALSE	-0.523984	4.00116	0.00204858	0.0544819	TRUE	-0.217025	5.19192	0.0537112	0.235986	FALSE	-0.208222	4.75565	0.202836	0.543434	FALSE	-0.181215	4.07275	0.24753	0.5226	FALSE	-0.114382	4.65975	0.440171	0.718726	FALSE	-0.392208	4.60614	0.0994114	0.393592	FALSE	NA	NA	NA	NA
ABHD2	-0.14854	4.955	0.193452	0.431649	FALSE	-0.149507	5.73626	0.161523	0.499938	FALSE	-0.193058	5.11695	0.0811701	0.428025	FALSE	0.0743384	5.08532	0.48585	0.732472	FALSE	-0.252659	5.84596	0.0368192	0.194229	FALSE	-0.104653	5.32287	0.528974	0.792904	FALSE	-0.0272978	4.80987	0.803906	0.916722	FALSE	-0.184718	5.12901	0.0927301	0.359312	FALSE	-0.249094	5.02775	0.10293	0.398999	FALSE	NA	NA	NA	NA
ABHD3	-0.32245	5.45026	0.00752908	0.0886856	TRUE	-0.122888	6.23807	0.274829	0.614471	FALSE	-0.109729	5.82108	0.306705	0.672841	FALSE	-0.219338	6.27959	0.192808	0.46761	FALSE	-0.382088	5.94573	0.00167328	0.0414224	TRUE	-0.155787	6.01463	0.304546	0.63964	FALSE	-0.23744	5.28896	0.01131	0.130439	FALSE	-0.275258	5.6715	0.0234801	0.188189	FALSE	-0.292436	6.11491	0.144027	0.469793	FALSE	NA	NA	NA	NA
ABHD4	-0.161047	4.28899	0.437777	0.663503	FALSE	-0.0353135	4.57031	0.828524	0.939496	FALSE	-0.201386	4.25655	0.294333	0.662902	FALSE	-0.307594	3.97392	0.113457	0.355737	FALSE	0.0474843	3.95615	0.784705	0.902875	FALSE	0.0141167	4.72593	0.93107	0.980368	FALSE	-0.107551	4.0672	0.547643	0.767669	FALSE	0.0817434	4.23701	0.67924	0.862198	FALSE	0.00415	4.81687	0.984817	0.996726	FALSE	NA	NA	NA	NA
ABHD5	0.183907	6.54877	0.309542	0.553328	FALSE	0.139647	6.86193	0.32648	0.660632	FALSE	-0.0340839	6.0815	0.866123	0.958955	FALSE	0.262087	7.53036	0.0311814	0.189392	FALSE	0.00288674	5.80794	0.984133	0.992439	FALSE	0.173023	6.47565	0.280762	0.619608	FALSE	0.186781	6.33601	0.198525	0.469131	FALSE	0.136172	6.33981	0.389915	0.679972	FALSE	0.323918	7.34133	0.0268187	0.239957	FALSE	NA	NA	NA	NA
ABHD6	-0.0719082	3.21168	0.701079	0.845841	FALSE	0.113034	3.96486	0.48797	0.778524	FALSE	-0.00237964	3.4715	0.992734	0.997138	FALSE	-0.26763	3.08749	0.177873	0.448468	FALSE	-0.125955	3.8823	0.477433	0.702747	FALSE	-0.191103	3.59907	0.201202	0.542333	FALSE	-0.0731556	3.46343	0.714458	0.864948	FALSE	-0.290186	3.28204	0.261618	0.570253	FALSE	NA	NA	NA	NA	NA	NA	NA	NA	NA
ABHD8	-0.29856	3.90018	0.0257375	0.159077	FALSE	-0.128435	3.86675	0.240983	0.581114	FALSE	-0.26862	4.04463	0.116704	0.482604	FALSE	-0.252266	3.49339	0.116603	0.361842	FALSE	-0.225198	3.37095	0.147789	0.391743	FALSE	-0.280209	3.91457	0.0992158	0.417681	FALSE	-0.269813	3.93979	0.0508721	0.243711	FALSE	-0.162665	3.71144	0.13515	0.422031	FALSE	NA	NA	NA	NA	NA	NA	NA	NA	NA
ABI1	0.0213561	6.82865	0.852668	0.92917	FALSE	-0.123575	7.66459	0.19533	0.536917	FALSE	-0.0823141	7.53741	0.522984	0.810146	FALSE	-0.0875842	7.47275	0.509757	0.748908	FALSE	0.00622638	7.79936	0.948893	0.978338	FALSE	-0.0748681	7.40491	0.472327	0.758688	FALSE	-0.151313	6.7988	0.145644	0.401979	FALSE	-0.00696946	7.31618	0.95255	0.984359	FALSE	0.0886231	7.54277	0.470648	0.751915	FALSE	-0.109339	7.92215	0.451616	0.709943
ABI2	0.0574776	3.21955	0.684664	0.835267	FALSE	0.0774845	4.07875	0.492583	0.78133	FALSE	-0.183051	3.89034	0.236922	0.607887	FALSE	-0.0356602	4.61465	0.804884	0.920943	FALSE	0.299024	4.45608	0.0471012	0.219153	FALSE	0.0434171	3.97838	0.805954	0.928638	FALSE	0.104028	3.23941	0.466907	0.710401	FALSE	-0.0120811	3.48229	0.92819	0.97571	FALSE	NA	NA	NA	NA	NA	-0.181507	5.56013	0.440698	0.704198
ABI3	-0.0216924	1.03026	0.957116	0.980081	FALSE	NA	NA	NA	NA	NA	NA	NA	NA	NA	NA	NA	NA	NA	NA	NA	NA	NA	NA	NA	NA	NA	NA	NA	NA	NA	NA	NA	NA	NA	NA	NA	NA	NA	NA	NA	NA	NA	NA	NA	NA	NA	NA	NA	NA
ABITRAM	0.358509	3.08075	0.00333351	0.0647643	TRUE	0.053068	3.36504	0.520109	0.794996	FALSE	0.19573	3.20165	0.0647365	0.387255	FALSE	0.17272	3.17323	0.294479	0.575719	FALSE	0.0532314	3.04585	0.640106	0.818639	FALSE	0.279719	3.44574	0.0138577	0.194925	FALSE	0.215442	3.03969	0.0549642	0.252017	FALSE	0.104563	3.16195	0.430983	0.7118	FALSE	NA	NA	NA	NA	NA	NA	NA	NA	NA
ABL1	-0.308937	4.47012	0.0611069	0.240094	FALSE	-0.000555001	5.88308	0.995331	0.999004	FALSE	-0.019171	5.44961	0.900608	0.970931	FALSE	-0.347231	4.79854	0.0648919	0.269796	FALSE	-0.354434	5.64121	0.0027547	0.0525381	TRUE	-0.191055	5.28845	0.18274	0.523247	FALSE	-0.274029	4.5886	0.068503	0.279755	FALSE	-0.179513	5.00403	0.245682	0.554151	FALSE	-0.503521	4.91679	0.0352306	0.265026	FALSE	NA	NA	NA	NA
ABL2	-0.0479488	6.50495	0.741238	0.866309	FALSE	-0.248527	7.44629	0.0328898	0.268207	FALSE	-0.231683	7.39658	0.207445	0.576685	FALSE	0.083281	8.17356	0.52885	0.762018	FALSE	0.0195744	7.81879	0.857076	0.935257	FALSE	-0.185616	7.19935	0.189801	0.529584	FALSE	-0.178269	6.43846	0.182653	0.451788	FALSE	-0.0609091	6.94845	0.664935	0.855875	FALSE	-0.135064	7.92636	0.220901	0.556585	FALSE	-0.280694	7.37837	0.130019	0.440501
ABR	-0.394495	6.81313	0.0196719	0.142014	FALSE	-0.24375	8.1144	0.0283414	0.251763	FALSE	-0.272606	7.76872	0.0982678	0.455777	FALSE	-0.227607	7.23622	0.111072	0.351321	FALSE	-0.187189	8.09798	0.083121	0.294568	FALSE	-0.284586	7.50465	0.0299325	0.271006	FALSE	-0.363909	6.86658	0.0101291	0.123312	FALSE	-0.177336	7.48212	0.182552	0.483764	FALSE	-0.311154	7.40915	0.0301745	0.247407	FALSE	-0.302989	6.97463	0.0836214	0.359273
ABRACL	0.584376	6.97022	0.0014225	0.0445099	TRUE	0.344413	6.57302	0.0223417	0.230244	FALSE	0.409438	6.63139	0.0179199	0.246648	FALSE	0.631018	6.89476	0.000297053	0.0214011	TRUE	0.259027	6.45244	0.025646	0.162453	FALSE	0.478529	6.79361	0.00355352	0.120207	FALSE	0.470151	6.95356	0.00254993	0.0615868	TRUE	0.47495	6.91771	0.000441824	0.0294727	TRUE	0.314211	7.28416	0.078293	0.361811	FALSE	NA	NA	NA	NA
ABRAXAS1	-0.0621715	2.24522	0.641921	0.810113	FALSE	0.00740515	2.48266	0.94825	0.985275	FALSE	0.125373	2.38933	0.400681	0.739169	FALSE	NA	NA	NA	NA	NA	-0.205865	2.59131	0.179222	0.432199	FALSE	NA	NA	NA	NA	NA	-0.227258	2.34252	0.10187	0.336058	FALSE	NA	NA	NA	NA	NA	NA	NA	NA	NA	NA	NA	NA	NA	NA
ABRAXAS2	0.00778075	4.85299	0.939434	0.971416	FALSE	0.0741022	5.20356	0.359789	0.687887	FALSE	0.134808	5.01551	0.115986	0.48141	FALSE	-0.156997	4.56703	0.210626	0.488911	FALSE	-0.0553891	5.11752	0.525295	0.740506	FALSE	0.0707512	5.04048	0.475406	0.759445	FALSE	-0.128856	4.82245	0.14582	0.402215	FALSE	0.0808595	5.05045	0.39427	0.682367	FALSE	-0.177153	5.22797	0.262249	0.596993	FALSE	0.0922504	5.32918	0.654795	0.838109
ABT1	0.225751	4.29183	0.100313	0.304632	FALSE	0.255067	4.06735	0.0102026	0.163838	FALSE	0.273858	4.10238	0.0349444	0.310504	FALSE	0.0841158	3.67339	0.631025	0.823646	FALSE	0.264754	4.25942	0.011967	0.113063	FALSE	0.313895	4.21965	0.00520079	0.131801	FALSE	0.087566	4.29585	0.478003	0.719564	FALSE	0.329098	4.20337	0.0163321	0.15977	FALSE	0.424145	4.36884	0.0237159	0.229227	FALSE	NA	NA	NA	NA
ABTB1	0.325185	3.21704	0.191152	0.430181	FALSE	0.0753497	2.77171	0.728941	0.899613	FALSE	0.227887	2.9688	0.414742	0.747405	FALSE	-0.139151	2.53654	0.457073	0.710848	FALSE	0.19694	3.71665	0.278312	0.544053	FALSE	0.0729027	3.05677	0.73725	0.901063	FALSE	0.0488462	3.12289	0.839407	0.933638	FALSE	NA	NA	NA	NA	NA	NA	NA	NA	NA	NA	NA	NA	NA	NA
ABTB2	0.403362	2.68352	0.29769	0.54274	FALSE	0.0453232	3.81866	0.876747	0.957594	FALSE	-0.413653	4.32736	0.401064	0.739169	FALSE	0.738966	5.91865	0.00467252	0.0787234	TRUE	0.368366	4.66512	0.248659	0.516203	FALSE	0.40605	3.92335	0.174194	0.511378	FALSE	NA	NA	NA	NA	NA	0.535321	4.07445	0.197748	0.500056	FALSE	0.271624	4.51604	0.394628	0.702696	FALSE	0.0638671	8.51169	0.756524	0.890643
AC002091.1	0.0346458	2.88696	0.835559	0.921415	FALSE	-0.115242	3.4789	0.469179	0.764121	FALSE	-0.17566	3.6501	0.39685	0.737531	FALSE	-0.126623	3.57084	0.575243	0.790619	FALSE	0.164214	3.80573	0.185569	0.440532	FALSE	-0.103537	3.28596	0.544216	0.800359	FALSE	-0.184294	2.95709	0.341802	0.609069	FALSE	0.0637621	3.31292	0.760802	0.907371	FALSE	NA	NA	NA	NA	NA	NA	NA	NA	NA
AC002456.1	0.469377	2.5602	0.18743	0.426208	FALSE	-0.0565139	2.56985	0.806152	0.93077	FALSE	-0.317232	2.71541	0.372845	0.724826	FALSE	0.85737	5.01016	0.00350701	0.0692365	TRUE	NA	NA	NA	NA	NA	NA	NA	NA	NA	NA	NA	NA	NA	NA	NA	NA	NA	NA	NA	NA	0.368074	5.24325	0.130397	0.447293	FALSE	NA	NA	NA	NA
AC002463.1	-0.550599	2.48853	0.0183356	0.137281	FALSE	-0.285259	3.77069	0.033274	0.268922	FALSE	-0.236605	3.96098	0.175454	0.548733	FALSE	-0.67103	3.07774	0.0014184	0.0482499	TRUE	-0.104516	3.75333	0.514135	0.730402	FALSE	-0.346432	3.60237	0.0966208	0.415275	FALSE	NA	NA	NA	NA	NA	-0.378722	3.46407	0.079558	0.338669	FALSE	NA	NA	NA	NA	NA	NA	NA	NA	NA
AC002467.1	0.570087	2.71379	0.019304	0.140296	FALSE	0.400494	2.34756	0.0483947	0.312334	FALSE	0.359041	2.42891	0.174922	0.548504	FALSE	0.644948	3.93603	0.00160552	0.0496786	TRUE	NA	NA	NA	NA	NA	NA	NA	NA	NA	NA	NA	NA	NA	NA	NA	NA	NA	NA	NA	NA	NA	NA	NA	NA	NA	NA	NA	NA	NA
AC002558.3	NA	NA	NA	NA	NA	-0.22762	1.767	0.0874796	0.389448	FALSE	NA	NA	NA	NA	NA	NA	NA	NA	NA	NA	NA	NA	NA	NA	NA	NA	NA	NA	NA	NA	NA	NA	NA	NA	NA	NA	NA	NA	NA	NA	NA	NA	NA	NA	NA	NA	NA	NA	NA
AC003093.1	NA	NA	NA	NA	NA	-0.358143	1.50219	0.300089	0.638814	FALSE	NA	NA	NA	NA	NA	NA	NA	NA	NA	NA	NA	NA	NA	NA	NA	NA	NA	NA	NA	NA	NA	NA	NA	NA	NA	NA	NA	NA	NA	NA	NA	NA	NA	NA	NA	NA	NA	NA	NA
AC003681.1	NA	NA	NA	NA	NA	-0.275592	2.60247	0.0791532	0.377448	FALSE	-0.21043	2.36018	0.308986	0.675363	FALSE	-0.255218	2.32597	0.319955	0.601997	FALSE	NA	NA	NA	NA	NA	NA	NA	NA	NA	NA	NA	NA	NA	NA	NA	NA	NA	NA	NA	NA	NA	NA	NA	NA	NA	NA	NA	NA	NA
AC004130.2	0.336496	2.98287	0.0320603	0.175271	FALSE	0.284179	2.80946	0.0833537	0.383326	FALSE	0.23979	3.15278	0.179902	0.553008	FALSE	0.382416	3.05388	0.0332955	0.194728	FALSE	0.253301	2.95931	0.235249	0.500516	FALSE	0.392824	3.15503	0.0880469	0.398039	FALSE	0.270294	2.95112	0.0676397	0.279325	FALSE	NA	NA	NA	NA	NA	NA	NA	NA	NA	NA	NA	NA	NA	NA
AC004241.1	NA	NA	NA	NA	NA	0.00998099	1.91078	0.949538	0.985522	FALSE	NA	NA	NA	NA	NA	NA	NA	NA	NA	NA	NA	NA	NA	NA	NA	NA	NA	NA	NA	NA	NA	NA	NA	NA	NA	NA	NA	NA	NA	NA	NA	NA	NA	NA	NA	NA	NA	NA	NA
AC004540.1	-0.444361	2.05565	0.117573	0.332182	FALSE	-0.472337	2.87104	0.0503983	0.316776	FALSE	-0.579347	2.14111	0.0637047	0.384255	FALSE	-0.0697311	4.40941	0.764321	0.901827	FALSE	NA	NA	NA	NA	NA	-0.354218	2.55075	0.207924	0.546476	FALSE	NA	NA	NA	NA	NA	NA	NA	NA	NA	NA	NA	NA	NA	NA	NA	NA	NA	NA	NA
AC004540.2	NA	NA	NA	NA	NA	-0.678691	2.04747	0.00649307	0.135905	FALSE	NA	NA	NA	NA	NA	NA	NA	NA	NA	NA	NA	NA	NA	NA	NA	NA	NA	NA	NA	NA	NA	NA	NA	NA	NA	NA	NA	NA	NA	NA	NA	NA	NA	NA	NA	NA	NA	NA	NA
AC004551.1	NA	NA	NA	NA	NA	0.089514	2.97721	0.736721	0.90354	FALSE	0.0900692	2.60525	0.837043	0.949221	FALSE	NA	NA	NA	NA	NA	NA	NA	NA	NA	NA	NA	NA	NA	NA	NA	NA	NA	NA	NA	NA	0.14071	3.81107	0.605895	0.826253	FALSE	NA	NA	NA	NA	NA	NA	NA	NA	NA
AC004687.1	0.0216597	2.71524	0.889595	0.946675	FALSE	-0.18736	3.35573	0.0554896	0.329054	FALSE	-0.132295	3.21339	0.311757	0.678786	FALSE	-0.0075213	3.17238	0.968057	0.987492	FALSE	-0.0555827	3.72151	0.645813	0.821307	FALSE	-0.344307	3.08101	0.0401518	0.298849	FALSE	0.0631534	2.80658	0.687642	0.850432	FALSE	0.144978	3.25985	0.355011	0.659561	FALSE	NA	NA	NA	NA	NA	NA	NA	NA	NA
AC004704.1	NA	NA	NA	NA	NA	NA	NA	NA	NA	NA	NA	NA	NA	NA	NA	0.979441	4.88576	0.0459601	0.225511	FALSE	NA	NA	NA	NA	NA	NA	NA	NA	NA	NA	NA	NA	NA	NA	NA	NA	NA	NA	NA	NA	NA	NA	NA	NA	NA	NA	NA	NA	NA
AC004797.1	-0.278493	2.22418	0.313302	0.556481	FALSE	-0.487422	2.27669	0.0443489	0.299315	FALSE	-0.0164224	2.2384	0.950171	0.987009	FALSE	NA	NA	NA	NA	NA	NA	NA	NA	NA	NA	NA	NA	NA	NA	NA	NA	NA	NA	NA	NA	NA	NA	NA	NA	NA	NA	NA	NA	NA	NA	NA	NA	NA	NA
AC004847.1	NA	NA	NA	NA	NA	-0.688125	1.42793	0.00685206	0.138493	FALSE	-0.484122	1.8294	0.0827335	0.431533	FALSE	NA	NA	NA	NA	NA	NA	NA	NA	NA	NA	NA	NA	NA	NA	NA	NA	NA	NA	NA	NA	NA	NA	NA	NA	NA	NA	NA	NA	NA	NA	NA	NA	NA	NA
AC004889.1	-0.591927	5.02598	0.0131246	0.115779	FALSE	-0.410909	5.83534	0.061195	0.340301	FALSE	-0.620418	5.21593	0.0356302	0.311476	FALSE	-0.600635	4.65218	0.00214311	0.0555987	TRUE	-0.761322	3.54005	0.054576	0.238479	FALSE	-0.380862	5.39286	0.0644852	0.352909	FALSE	-0.614615	4.89976	0.0105332	0.125634	FALSE	-0.545137	5.00995	0.0214709	0.180983	FALSE	-0.227477	5.14476	0.364937	0.677115	FALSE	NA	NA	NA	NA
AC004918.1	0.0946093	1.60474	0.688834	0.837785	FALSE	0.137046	1.88065	0.484192	0.776243	FALSE	NA	NA	NA	NA	NA	0.315005	2.10541	0.125832	0.375788	FALSE	NA	NA	NA	NA	NA	NA	NA	NA	NA	NA	NA	NA	NA	NA	NA	NA	NA	NA	NA	NA	NA	NA	NA	NA	NA	NA	NA	NA	NA
AC004921.1	0.343727	2.97254	0.149167	0.378171	FALSE	0.0293339	2.78735	0.886039	0.960594	FALSE	-0.0180365	2.59342	0.933419	0.983227	FALSE	0.201133	3.2047	0.374846	0.648408	FALSE	0.300428	2.89514	0.174441	0.4245	FALSE	0.327382	2.85211	0.215164	0.552573	FALSE	0.205493	2.76055	0.325351	0.593832	FALSE	NA	NA	NA	NA	NA	NA	NA	NA	NA	NA	NA	NA	NA	NA
AC004951.1	-0.703785	1.81044	0.00148413	0.0451008	TRUE	-0.363846	3.42367	0.00659372	0.135907	FALSE	-0.452584	2.88946	0.0372588	0.313135	FALSE	NA	NA	NA	NA	NA	-0.503757	3.06497	0.00477606	0.0688984	TRUE	-0.476567	2.79843	0.0383871	0.295687	FALSE	NA	NA	NA	NA	NA	NA	NA	NA	NA	NA	NA	NA	NA	NA	NA	NA	NA	NA	NA
AC004988.1	-0.344757	4.28256	0.0665253	0.250304	FALSE	-0.61522	4.76627	0.0015433	0.0845044	TRUE	-0.630022	4.66695	0.0113234	0.216747	FALSE	0.0663093	5.1957	0.749078	0.89301	FALSE	-0.733447	4.41011	0.00359902	0.0589945	TRUE	-0.618638	4.48946	0.00363754	0.120207	FALSE	-0.107009	4.32094	0.507343	0.7381	FALSE	-0.295947	4.87985	0.07583	0.330944	FALSE	-0.00323953	4.96019	0.988621	0.996726	FALSE	NA	NA	NA	NA
AC005037.1	NA	NA	NA	NA	NA	-0.237384	2.95502	0.0110585	0.169447	FALSE	-0.119982	2.79458	0.442901	0.765856	FALSE	-0.461134	2.68427	0.010413	0.114546	FALSE	-0.205429	2.66387	0.12432	0.359979	FALSE	-0.244717	2.68367	0.143548	0.476106	FALSE	NA	NA	NA	NA	NA	NA	NA	NA	NA	NA	NA	NA	NA	NA	NA	NA	NA	NA	NA
AC005062.1	-0.683385	4.01036	0.018089	0.13655	FALSE	-0.53733	5.78842	0.0228342	0.231423	FALSE	-0.586171	5.18319	0.0500425	0.348408	FALSE	-0.276619	4.89902	0.380481	0.652774	FALSE	-0.775535	4.13739	0.003263	0.0560915	TRUE	-0.336457	4.79637	0.273454	0.614116	FALSE	-0.676009	3.99021	0.0115577	0.132073	FALSE	-0.665555	4.65877	0.00994112	0.125428	FALSE	NA	NA	NA	NA	NA	NA	NA	NA	NA
AC005082.1	0.626094	1.55608	0.132076	0.354761	FALSE	0.779785	1.70771	0.0325743	0.266611	FALSE	0.744837	1.7603	0.115469	0.480521	FALSE	NA	NA	NA	NA	NA	NA	NA	NA	NA	NA	NA	NA	NA	NA	NA	NA	NA	NA	NA	NA	NA	NA	NA	NA	NA	NA	NA	NA	NA	NA	NA	NA	NA	NA
AC005083.1	1.09143	4.44922	0.00692576	0.0860114	TRUE	0.718498	4.42562	0.0112474	0.169447	FALSE	0.6243	4.59119	0.127871	0.494978	FALSE	0.813821	5.40817	0.0134503	0.126565	FALSE	0.424156	3.46443	0.1034	0.327353	FALSE	1.1916	4.80428	0.00135929	0.0865072	TRUE	0.773629	4.18909	0.0202898	0.1635	FALSE	NA	NA	NA	NA	NA	1.35039	5.28592	0.00133361	0.080103	TRUE	NA	NA	NA	NA
AC005224.2	NA	NA	NA	NA	NA	NA	NA	NA	NA	NA	NA	NA	NA	NA	NA	NA	NA	NA	NA	NA	-0.512011	2.65286	0.120149	0.353647	FALSE	NA	NA	NA	NA	NA	NA	NA	NA	NA	NA	NA	NA	NA	NA	NA	NA	NA	NA	NA	NA	NA	NA	NA	NA
AC005225.2	-0.00725996	3.60455	0.961106	0.981252	FALSE	-0.214218	4.21718	0.131125	0.460611	FALSE	0.0851906	3.79774	0.673494	0.881198	FALSE	-0.050622	3.75631	0.761612	0.900949	FALSE	-0.0313054	3.21428	0.837715	0.927821	FALSE	0.0291299	3.94374	0.878943	0.95977	FALSE	-0.0231507	3.67826	0.874423	0.949835	FALSE	-0.108931	3.71188	0.491712	0.756445	FALSE	NA	NA	NA	NA	NA	NA	NA	NA	NA
AC005261.1	0.0181296	2.87301	0.901471	0.952944	FALSE	0.167882	3.79685	0.0868483	0.388722	FALSE	-0.113519	3.40704	0.545212	0.824144	FALSE	-0.467083	2.95376	0.0195782	0.151697	FALSE	0.0477361	3.51969	0.741708	0.879266	FALSE	-0.0635023	3.55363	0.740478	0.902439	FALSE	0.0390999	2.97217	0.793344	0.911068	FALSE	NA	NA	NA	NA	NA	NA	NA	NA	NA	NA	NA	NA	NA	NA
AC005280.1	NA	NA	NA	NA	NA	-0.207464	1.69035	0.333991	0.668172	FALSE	-0.601141	1.70624	0.0911994	0.445844	FALSE	-0.0188663	2.82055	0.943067	0.978859	FALSE	NA	NA	NA	NA	NA	NA	NA	NA	NA	NA	NA	NA	NA	NA	NA	NA	NA	NA	NA	NA	NA	NA	NA	NA	NA	NA	NA	NA	NA
AC005280.2	0.193438	4.5949	0.522065	0.726807	FALSE	-0.172249	5.27826	0.535504	0.803439	FALSE	-0.337509	5.15522	0.288106	0.657048	FALSE	-0.083843	5.24064	0.65736	0.841017	FALSE	0.117765	5.40494	0.656597	0.828886	FALSE	-0.167935	4.7729	0.591689	0.823101	FALSE	-0.16926	4.5751	0.496773	0.732441	FALSE	-0.224982	4.42871	0.464531	0.734376	FALSE	-0.133109	5.47774	0.549754	0.802014	FALSE	NA	NA	NA	NA
AC005332.6	-0.105708	2.51166	0.386484	0.618438	FALSE	0.0306751	3.0667	0.77146	0.917419	FALSE	0.0540082	2.92396	0.735436	0.909829	FALSE	-0.339191	2.54272	0.0281525	0.180769	FALSE	-0.199472	2.90806	0.170554	0.420571	FALSE	-0.25777	2.83677	0.104482	0.424123	FALSE	0.0126461	2.5283	0.930185	0.972108	FALSE	NA	NA	NA	NA	NA	NA	NA	NA	NA	NA	NA	NA	NA	NA
AC005480.1	NA	NA	NA	NA	NA	-0.0798675	3.19528	0.462312	0.760067	FALSE	-0.229256	3.01112	0.195044	0.564166	FALSE	-0.386056	3.0405	0.0602009	0.259455	FALSE	0.0528062	3.24248	0.713254	0.861419	FALSE	-0.377602	2.97362	0.0559788	0.336634	FALSE	NA	NA	NA	NA	NA	NA	NA	NA	NA	NA	NA	NA	NA	NA	NA	NA	NA	NA	NA
AC005523.2	NA	NA	NA	NA	NA	-0.108613	2.21234	0.497267	0.78335	FALSE	0.0796297	2.20363	0.661691	0.875237	FALSE	-0.00720286	2.23575	0.975721	0.989455	FALSE	NA	NA	NA	NA	NA	NA	NA	NA	NA	NA	NA	NA	NA	NA	NA	NA	NA	NA	NA	NA	NA	NA	NA	NA	NA	NA	NA	NA	NA
AC005562.1	-0.130045	3.83747	0.190768	0.430143	FALSE	0.0252295	4.3607	0.734623	0.902726	FALSE	-0.0808316	4.19837	0.414093	0.747032	FALSE	-0.148433	4.03368	0.227096	0.506425	FALSE	-0.170111	4.2892	0.0616552	0.252984	FALSE	0.0141784	4.29544	0.891416	0.964026	FALSE	0.00811629	3.87959	0.929112	0.971962	FALSE	-0.0207174	4.03367	0.841545	0.943886	FALSE	-0.118989	4.42192	0.352152	0.665944	FALSE	NA	NA	NA	NA
AC005670.3	-0.12626	2.88289	0.521819	0.726731	FALSE	-0.122773	4.05655	0.400845	0.721018	FALSE	0.0137579	3.57071	0.953331	0.98851	FALSE	0.00339809	3.18853	0.987191	0.994316	FALSE	-0.140654	3.75031	0.371529	0.624429	FALSE	-0.17147	3.55358	0.435775	0.731261	FALSE	-0.249256	2.96252	0.240446	0.516367	FALSE	-0.158958	3.47063	0.379449	0.674054	FALSE	NA	NA	NA	NA	NA	NA	NA	NA	NA
AC005695.2	NA	NA	NA	NA	NA	0.370159	2.00646	0.0933338	0.402811	FALSE	NA	NA	NA	NA	NA	NA	NA	NA	NA	NA	NA	NA	NA	NA	NA	NA	NA	NA	NA	NA	NA	NA	NA	NA	NA	NA	NA	NA	NA	NA	NA	NA	NA	NA	NA	NA	NA	NA	NA
AC005726.1	NA	NA	NA	NA	NA	0.207141	2.3599	0.220847	0.560804	FALSE	-0.192216	1.76441	0.455289	0.772449	FALSE	NA	NA	NA	NA	NA	0.171013	2.16964	0.361786	0.616125	FALSE	NA	NA	NA	NA	NA	NA	NA	NA	NA	NA	NA	NA	NA	NA	NA	NA	NA	NA	NA	NA	NA	NA	NA	NA
AC005786.3	NA	NA	NA	NA	NA	0.0230757	2.37401	0.893621	0.963181	FALSE	-0.192402	1.90684	0.383177	0.729806	FALSE	-0.226616	2.0261	0.231519	0.512026	FALSE	0.375554	2.90869	0.0166311	0.136726	FALSE	NA	NA	NA	NA	NA	NA	NA	NA	NA	NA	NA	NA	NA	NA	NA	NA	NA	NA	NA	NA	NA	NA	NA	NA
AC005920.2	-0.0176906	1.68202	0.949148	0.975845	FALSE	0.087429	3.12066	0.618038	0.852605	FALSE	0.107011	2.89753	0.639427	0.864051	FALSE	-0.108236	4.15587	0.631281	0.823646	FALSE	0.366928	3.74641	0.0471959	0.219381	FALSE	0.12614	3.12199	0.624369	0.842798	FALSE	NA	NA	NA	NA	NA	NA	NA	NA	NA	NA	NA	NA	NA	NA	NA	NA	NA	NA	NA
AC005921.2	1.05472	3.49716	2.39568e-06	0.00179731	TRUE	0.55967	3.55358	0.00518566	0.125928	FALSE	0.690113	3.53008	0.00721789	0.185363	FALSE	0.588134	3.44174	0.010711	0.115916	FALSE	0.900149	3.41835	1.21669e-05	0.0039736	TRUE	0.769112	3.83806	8.23685e-05	0.0343477	TRUE	0.70139	3.40924	0.00108945	0.04148	TRUE	0.866841	3.56744	1.88255e-05	0.00623237	TRUE	NA	NA	NA	NA	NA	NA	NA	NA	NA
AC006001.2	-0.255175	5.0086	0.227878	0.471096	FALSE	-0.0523764	6.3407	0.764869	0.915129	FALSE	-0.18996	5.9851	0.367793	0.721364	FALSE	-0.224934	5.88772	0.218795	0.497696	FALSE	-0.125318	6.6771	0.422988	0.662972	FALSE	-0.236424	5.99739	0.210901	0.548151	FALSE	-0.140652	5.17046	0.479294	0.720139	FALSE	-0.200751	5.53787	0.272868	0.578316	FALSE	-0.254434	6.30361	0.310141	0.632107	FALSE	-0.103494	6.3732	0.554588	0.784422
AC006059.1	-0.0615779	2.2898	0.738634	0.86463	FALSE	0.1893	3.51589	0.132652	0.463354	FALSE	-0.00539754	3.13465	0.976203	0.993775	FALSE	-0.11933	2.87495	0.620914	0.817021	FALSE	-0.122052	3.35563	0.336765	0.598308	FALSE	0.103258	3.17267	0.539792	0.798106	FALSE	-0.0166434	2.37808	0.938138	0.976225	FALSE	NA	NA	NA	NA	NA	NA	NA	NA	NA	NA	NA	NA	NA	NA
AC006141.1	NA	NA	NA	NA	NA	-0.253003	3.05326	0.0818716	0.381907	FALSE	-0.350457	2.48691	0.0457016	0.337142	FALSE	-0.635877	2.23099	0.00682296	0.0939642	TRUE	-0.428604	2.54096	0.00476969	0.0688984	TRUE	-0.554177	2.4375	0.00711181	0.145309	FALSE	NA	NA	NA	NA	NA	NA	NA	NA	NA	NA	NA	NA	NA	NA	NA	NA	NA	NA	NA
AC006160.1	NA	NA	NA	NA	NA	-0.51414	3.43296	0.0391822	0.284168	FALSE	-0.457802	3.40954	0.123875	0.489273	FALSE	NA	NA	NA	NA	NA	-0.374929	3.57703	0.129414	0.366295	FALSE	-0.185971	2.97067	0.521082	0.787341	FALSE	NA	NA	NA	NA	NA	-0.284273	4.09868	0.176565	0.476536	FALSE	NA	NA	NA	NA	NA	NA	NA	NA	NA
AC006333.2	0.264513	2.49253	0.124654	0.342056	FALSE	0.0280111	2.23781	0.855015	0.950875	FALSE	0.424747	2.45503	0.0277878	0.292039	FALSE	0.366529	2.94764	0.0373522	0.203621	FALSE	0.0711282	2.41181	0.687126	0.843845	FALSE	0.348036	2.47314	0.153621	0.490368	FALSE	0.203457	2.60017	0.113342	0.352309	FALSE	NA	NA	NA	NA	NA	NA	NA	NA	NA	NA	NA	NA	NA	NA
AC006369.1	0.686641	1.69263	0.0285398	0.166195	FALSE	0.585846	3.03823	0.0500812	0.316653	FALSE	0.404139	2.70411	0.266997	0.639657	FALSE	0.882422	4.47485	0.00159204	0.0496786	TRUE	NA	NA	NA	NA	NA	NA	NA	NA	NA	NA	NA	NA	NA	NA	NA	NA	NA	NA	NA	NA	NA	NA	NA	NA	NA	NA	NA	NA	NA
AC006449.6	0.0789564	2.84879	0.712696	0.851838	FALSE	-0.145342	2.69176	0.470721	0.765885	FALSE	-0.279467	2.98982	0.242873	0.614251	FALSE	0.338841	3.44568	0.110495	0.350161	FALSE	0.0773386	3.69837	0.703753	0.854989	FALSE	0.191856	3.02216	0.443155	0.737305	FALSE	-0.0585997	2.72553	0.747907	0.884803	FALSE	NA	NA	NA	NA	NA	NA	NA	NA	NA	NA	NA	NA	NA	NA
AC006460.2	NA	NA	NA	NA	NA	-0.611543	1.9993	0.00188459	0.0858702	TRUE	-0.341633	2.25165	0.1305	0.500109	FALSE	NA	NA	NA	NA	NA	-0.258222	2.77531	0.169857	0.419713	FALSE	NA	NA	NA	NA	NA	NA	NA	NA	NA	NA	NA	NA	NA	NA	NA	NA	NA	NA	NA	NA	NA	NA	NA	NA
AC006504.5	-0.536577	3.27013	0.0066435	0.0855907	TRUE	-0.480963	4.40568	0.0324261	0.265603	FALSE	-0.38604	3.77838	0.140053	0.510879	FALSE	-0.66555	3.07851	0.000129592	0.0148938	TRUE	-0.588094	3.46878	0.000847203	0.0296021	TRUE	-0.569552	3.79826	0.0100861	0.170771	FALSE	-0.354436	3.18831	0.0681613	0.279614	FALSE	-0.440865	3.58344	0.056933	0.289921	FALSE	NA	NA	NA	NA	NA	NA	NA	NA	NA
AC006581.2	NA	NA	NA	NA	NA	0.340064	2.85737	0.306944	0.645906	FALSE	0.118182	2.39318	0.738558	0.910319	FALSE	0.385319	4.02442	0.0994517	0.33427	FALSE	0.522076	2.65475	0.148191	0.39216	FALSE	0.286028	2.5977	0.382349	0.69647	FALSE	NA	NA	NA	NA	NA	NA	NA	NA	NA	NA	NA	NA	NA	NA	NA	NA	NA	NA	NA
AC007038.1	-0.444381	1.9616	0.0788359	0.2721	FALSE	0.062696	3.57716	0.637315	0.859848	FALSE	-0.0396552	3.03419	0.830758	0.947094	FALSE	-0.591323	2.46053	0.00987613	0.110865	FALSE	-0.0399579	3.39677	0.807397	0.913151	FALSE	0.13117	2.8165	0.650858	0.854424	FALSE	NA	NA	NA	NA	NA	NA	NA	NA	NA	NA	NA	NA	NA	NA	NA	NA	NA	NA	NA
AC007216.4	-0.292386	2.39554	0.0868877	0.285806	FALSE	0.0425443	3.62662	0.647579	0.865537	FALSE	-0.0855413	3.37535	0.514312	0.804728	FALSE	-0.216045	3.5647	0.329457	0.60954	FALSE	-0.157075	3.64985	0.175518	0.426472	FALSE	-0.237877	3.18011	0.116	0.441628	FALSE	NA	NA	NA	NA	NA	NA	NA	NA	NA	NA	NA	NA	NA	NA	NA	NA	NA	NA	NA
AC007319.1	-0.377951	1.93922	0.175529	0.411507	FALSE	0.0378008	3.47105	0.877033	0.957594	FALSE	0.0692577	3.21956	0.823154	0.945911	FALSE	0.288899	3.67301	0.289927	0.571916	FALSE	0.0259123	3.86172	0.904142	0.957901	FALSE	0.204509	2.92704	0.492289	0.772279	FALSE	NA	NA	NA	NA	NA	NA	NA	NA	NA	NA	NA	NA	NA	NA	NA	-0.452776	7.24451	0.247044	0.575003
AC007384.1	0.0320881	2.08518	0.903332	0.954104	FALSE	-0.252526	3.08261	0.243822	0.584587	FALSE	-0.403968	3.29981	0.22234	0.5947	FALSE	0.0392289	4.67944	0.86694	0.945657	FALSE	0.473863	4.84544	0.0424066	0.207969	FALSE	-0.146549	2.78596	0.534212	0.796396	FALSE	NA	NA	NA	NA	NA	NA	NA	NA	NA	NA	NA	NA	NA	NA	NA	NA	NA	NA	NA
AC007566.1	NA	NA	NA	NA	NA	0.0557126	3.23711	0.725993	0.898766	FALSE	-0.226572	2.77233	0.374534	0.725052	FALSE	NA	NA	NA	NA	NA	-0.325091	3.00907	0.067986	0.266244	FALSE	-0.337464	2.50965	0.11392	0.439943	FALSE	NA	NA	NA	NA	NA	NA	NA	NA	NA	NA	NA	NA	NA	NA	NA	NA	NA	NA	NA
AC007569.1	NA	NA	NA	NA	NA	-0.369603	2.36214	0.0275095	0.248594	FALSE	NA	NA	NA	NA	NA	-0.802901	2.2313	0.00164203	0.0502618	TRUE	NA	NA	NA	NA	NA	NA	NA	NA	NA	NA	NA	NA	NA	NA	NA	NA	NA	NA	NA	NA	NA	NA	NA	NA	NA	NA	NA	NA	NA
AC007780.1	NA	NA	NA	NA	NA	0.145722	2.55381	0.486544	0.777927	FALSE	-0.0912444	2.34395	0.748162	0.914258	FALSE	0.0566062	2.23181	0.860573	0.942774	FALSE	NA	NA	NA	NA	NA	NA	NA	NA	NA	NA	NA	NA	NA	NA	NA	NA	NA	NA	NA	NA	NA	NA	NA	NA	NA	NA	NA	NA	NA
AC007923.4	NA	NA	NA	NA	NA	-0.196255	2.90333	0.234142	0.572305	FALSE	-0.457352	2.72614	0.0325078	0.306708	FALSE	NA	NA	NA	NA	NA	0.0163718	2.72783	0.928171	0.96906	FALSE	NA	NA	NA	NA	NA	NA	NA	NA	NA	NA	NA	NA	NA	NA	NA	NA	NA	NA	NA	NA	NA	NA	NA	NA
AC007952.4	NA	NA	NA	NA	NA	NA	NA	NA	NA	NA	NA	NA	NA	NA	NA	0.744914	3.20201	0.11086	0.350899	FALSE	NA	NA	NA	NA	NA	NA	NA	NA	NA	NA	NA	NA	NA	NA	NA	NA	NA	NA	NA	NA	NA	NA	NA	NA	NA	NA	NA	NA	NA
AC007991.3	NA	NA	NA	NA	NA	NA	NA	NA	NA	NA	NA	NA	NA	NA	NA	NA	NA	NA	NA	NA	NA	NA	NA	NA	NA	NA	NA	NA	NA	NA	NA	NA	NA	NA	NA	NA	NA	NA	NA	NA	NA	NA	NA	NA	NA	-0.16009	6.8813	0.661158	0.841321
AC008014.1	0.0464214	1.91819	0.883501	0.943685	FALSE	0.311414	3.28794	0.332911	0.666514	FALSE	-0.108064	2.55787	0.761942	0.920503	FALSE	0.501438	4.213	0.0889601	0.316441	FALSE	NA	NA	NA	NA	NA	NA	NA	NA	NA	NA	NA	NA	NA	NA	NA	NA	NA	NA	NA	NA	NA	NA	NA	NA	NA	NA	NA	NA	NA
AC008105.3	-0.303934	2.80259	0.172405	0.407431	FALSE	-0.515533	3.7907	0.0249592	0.239254	FALSE	-0.572694	3.69932	0.00510975	0.160973	FALSE	-0.186086	3.66602	0.216811	0.495993	FALSE	0.196448	4.97058	0.186706	0.441941	FALSE	-0.141454	3.51332	0.525823	0.790762	FALSE	-0.335109	3.07517	0.0474215	0.235325	FALSE	-0.298151	3.25673	0.0974987	0.367484	FALSE	NA	NA	NA	NA	NA	0.0328322	7.27835	0.866291	0.946794
AC008443.1	NA	NA	NA	NA	NA	-0.0723005	3.01152	0.49557	0.782437	FALSE	-0.427205	2.72339	0.00869748	0.194762	FALSE	-0.16186	2.72572	0.476118	0.723279	FALSE	-0.161217	2.92139	0.289782	0.554871	FALSE	-0.24694	2.88862	0.209235	0.547169	FALSE	NA	NA	NA	NA	NA	NA	NA	NA	NA	NA	NA	NA	NA	NA	NA	NA	NA	NA	NA
AC008569.1	NA	NA	NA	NA	NA	-0.149056	1.71308	0.449533	0.753562	FALSE	NA	NA	NA	NA	NA	NA	NA	NA	NA	NA	NA	NA	NA	NA	NA	NA	NA	NA	NA	NA	NA	NA	NA	NA	NA	NA	NA	NA	NA	NA	NA	NA	NA	NA	NA	NA	NA	NA	NA
AC008771.1	-0.505233	4.11107	0.0459766	0.209832	FALSE	-0.371335	5.38898	0.0492031	0.3143	FALSE	-0.378612	5.0808	0.0974445	0.454469	FALSE	-0.583041	4.98664	0.00270732	0.062702	TRUE	-0.0663483	5.75244	0.726751	0.870091	FALSE	-0.299633	5.1605	0.22637	0.564019	FALSE	-0.317457	4.00565	0.184326	0.452753	FALSE	-0.401488	4.56695	0.0576902	0.291198	FALSE	-0.393446	5.34671	0.0590461	0.320862	FALSE	0.330712	5.85204	0.248021	0.575003
AC008875.3	-0.576689	2.45087	0.0650688	0.248285	FALSE	-0.571375	2.64686	0.0660794	0.350982	FALSE	-0.319619	2.71135	0.408944	0.744851	FALSE	-0.0161224	2.60079	0.952623	0.982421	FALSE	NA	NA	NA	NA	NA	NA	NA	NA	NA	NA	NA	NA	NA	NA	NA	NA	NA	NA	NA	NA	NA	NA	NA	NA	NA	NA	NA	NA	NA
AC008892.1	NA	NA	NA	NA	NA	NA	NA	NA	NA	NA	NA	NA	NA	NA	NA	0.360881	2.4198	0.214765	0.493822	FALSE	NA	NA	NA	NA	NA	NA	NA	NA	NA	NA	NA	NA	NA	NA	NA	NA	NA	NA	NA	NA	NA	NA	NA	NA	NA	NA	NA	NA	NA
AC008915.2	NA	NA	NA	NA	NA	0.18754	2.02681	0.27531	0.61528	FALSE	NA	NA	NA	NA	NA	0.07885	2.22587	0.672422	0.85013	FALSE	NA	NA	NA	NA	NA	NA	NA	NA	NA	NA	NA	NA	NA	NA	NA	NA	NA	NA	NA	NA	NA	NA	NA	NA	NA	NA	NA	NA	NA
AC008957.1	NA	NA	NA	NA	NA	-0.191272	2.40842	0.221763	0.562154	FALSE	-0.194348	2.31191	0.32073	0.685955	FALSE	NA	NA	NA	NA	NA	-0.226047	2.36729	0.205539	0.466023	FALSE	NA	NA	NA	NA	NA	NA	NA	NA	NA	NA	NA	NA	NA	NA	NA	NA	NA	NA	NA	NA	NA	NA	NA	NA
AC008957.2	-0.361588	2.1476	0.236607	0.479757	FALSE	-0.207184	3.34799	0.407865	0.726733	FALSE	-0.0468909	3.84119	0.878161	0.964267	FALSE	NA	NA	NA	NA	NA	0.282931	3.79347	0.197468	0.45488	FALSE	NA	NA	NA	NA	NA	NA	NA	NA	NA	NA	NA	NA	NA	NA	NA	NA	NA	NA	NA	NA	NA	NA	NA	NA
AC008969.1	NA	NA	NA	NA	NA	-0.294341	2.03878	0.179952	0.519798	FALSE	NA	NA	NA	NA	NA	NA	NA	NA	NA	NA	NA	NA	NA	NA	NA	NA	NA	NA	NA	NA	NA	NA	NA	NA	NA	NA	NA	NA	NA	NA	NA	NA	NA	NA	NA	NA	NA	NA	NA
AC009061.2	-0.25791	1.61314	0.192709	0.4313	FALSE	-0.0380087	2.63258	0.836473	0.942757	FALSE	-0.258357	1.90167	0.293483	0.662238	FALSE	NA	NA	NA	NA	NA	NA	NA	NA	NA	NA	NA	NA	NA	NA	NA	NA	NA	NA	NA	NA	NA	NA	NA	NA	NA	NA	NA	NA	NA	NA	NA	NA	NA	NA
AC009093.2	-1.05459	4.34947	0.000452206	0.0265685	TRUE	-0.686267	6.11368	0.00421045	0.118284	FALSE	-0.670414	5.49178	0.00182304	0.109425	FALSE	-0.808955	5.11433	2.24117e-05	0.00702084	TRUE	-0.527373	5.81892	0.00113314	0.0345824	TRUE	-0.691209	5.13188	0.0046188	0.128015	FALSE	-0.895886	4.47807	0.000890597	0.0384412	TRUE	-0.570776	5.01822	0.00724333	0.109685	FALSE	-0.850248	5.13404	0.00467611	0.12066	FALSE	NA	NA	NA	NA
AC009107.2	1.22999	3.83099	0.000867604	0.0351109	TRUE	0.698156	3.60327	0.0453281	0.302311	FALSE	0.672609	3.6757	0.0707493	0.402739	FALSE	0.757329	3.85855	0.0320423	0.191064	FALSE	0.964617	3.76732	0.00316485	0.0554129	TRUE	0.97775	3.9747	0.000971929	0.0762092	TRUE	1.0487	3.62141	0.0028379	0.0654594	TRUE	1.14888	3.7196	0.000365883	0.0267543	TRUE	NA	NA	NA	NA	NA	NA	NA	NA	NA
AC009120.2	-0.0397814	2.63222	0.845444	0.926473	FALSE	0.19313	4.09385	0.299111	0.638238	FALSE	0.116487	3.60811	0.561254	0.828704	FALSE	0.12439	3.64327	0.548055	0.773598	FALSE	0.247291	3.99673	0.0855646	0.299601	FALSE	-0.0761771	3.56048	0.647755	0.853612	FALSE	-0.072108	2.69953	0.685921	0.849751	FALSE	NA	NA	NA	NA	NA	NA	NA	NA	NA	NA	NA	NA	NA	NA
AC009133.1	-1.02879	2.66136	0.000105917	0.012153	TRUE	-0.653813	3.45386	0.00313182	0.104217	FALSE	-0.679293	3.58998	0.0352744	0.31061	FALSE	-0.643457	2.78441	0.00983671	0.110628	FALSE	-0.622895	3.0161	0.0200448	0.145302	FALSE	-0.53722	3.3601	0.0574477	0.339242	FALSE	-0.66661	2.78246	0.0249617	0.177812	FALSE	-0.506622	3.55881	0.0207197	0.177741	FALSE	NA	NA	NA	NA	NA	NA	NA	NA	NA
AC009226.1	-0.336507	2.64388	0.11393	0.327886	FALSE	-0.000856511	4.06016	0.996457	0.999193	FALSE	-0.230734	3.80822	0.387105	0.731316	FALSE	-0.0415227	4.03731	0.825339	0.928542	FALSE	-0.308036	3.2193	0.138562	0.37887	FALSE	-0.394182	3.43992	0.133197	0.465033	FALSE	-0.0998944	2.69168	0.684219	0.848849	FALSE	-0.0397718	3.31468	0.867183	0.954786	FALSE	NA	NA	NA	NA	NA	NA	NA	NA	NA
AC009303.2	NA	NA	NA	NA	NA	-0.537067	2.66254	0.00255486	0.097312	TRUE	-0.254768	2.79679	0.299917	0.66674	FALSE	0.0803547	3.2957	0.682815	0.855979	FALSE	-0.0108959	3.03948	0.949961	0.978387	FALSE	-0.342892	2.61363	0.11622	0.441863	FALSE	NA	NA	NA	NA	NA	NA	NA	NA	NA	NA	NA	NA	NA	NA	NA	NA	NA	NA	NA
AC009313.1	-0.131837	2.37676	0.518937	0.724995	FALSE	-0.293241	3.07689	0.0537524	0.323829	FALSE	0.117441	3.39751	0.470018	0.78099	FALSE	-0.0311008	3.9977	0.874135	0.949271	FALSE	0.611444	3.88327	0.000221502	0.0146536	TRUE	0.0510203	3.0564	0.807579	0.929055	FALSE	NA	NA	NA	NA	NA	NA	NA	NA	NA	NA	NA	NA	NA	NA	NA	0.0454431	6.00368	0.819749	0.922482
AC009318.1	NA	NA	NA	NA	NA	0.0258408	2.7384	0.864825	0.953675	FALSE	-0.0180683	2.42858	0.924065	0.979797	FALSE	NA	NA	NA	NA	NA	NA	NA	NA	NA	NA	NA	NA	NA	NA	NA	NA	NA	NA	NA	NA	NA	NA	NA	NA	NA	NA	NA	NA	NA	NA	NA	NA	NA	NA
AC009403.1	NA	NA	NA	NA	NA	0.140355	1.85758	0.380249	0.704455	FALSE	NA	NA	NA	NA	NA	NA	NA	NA	NA	NA	NA	NA	NA	NA	NA	NA	NA	NA	NA	NA	NA	NA	NA	NA	NA	NA	NA	NA	NA	NA	NA	NA	NA	NA	NA	NA	NA	NA	NA
AC009522.1	0.0306023	1.10672	0.932976	0.9676	FALSE	-0.313285	2.12728	0.301744	0.640949	FALSE	-0.165106	2.86239	0.667751	0.877879	FALSE	0.510755	4.06074	0.145775	0.404634	FALSE	NA	NA	NA	NA	NA	NA	NA	NA	NA	NA	NA	NA	NA	NA	NA	NA	NA	NA	NA	NA	NA	NA	NA	NA	NA	NA	NA	NA	NA
AC009554.1	NA	NA	NA	NA	NA	-0.0831968	2.12792	0.651612	0.867762	FALSE	NA	NA	NA	NA	NA	NA	NA	NA	NA	NA	NA	NA	NA	NA	NA	NA	NA	NA	NA	NA	NA	NA	NA	NA	NA	NA	NA	NA	NA	NA	NA	NA	NA	NA	NA	NA	NA	NA	NA
AC009630.1	NA	NA	NA	NA	NA	0.0322219	2.31488	0.838788	0.943759	FALSE	-0.144654	2.31205	0.453853	0.771428	FALSE	0.0210143	2.40138	0.916743	0.96798	FALSE	NA	NA	NA	NA	NA	NA	NA	NA	NA	NA	NA	NA	NA	NA	NA	NA	NA	NA	NA	NA	NA	NA	NA	NA	NA	NA	NA	NA	NA
AC009690.2	-0.398174	2.40667	0.0782247	0.271104	FALSE	-0.187665	3.61056	0.136981	0.468897	FALSE	-0.346542	3.13258	0.107503	0.469488	FALSE	-0.362438	3.36759	0.0185548	0.146946	FALSE	-0.193289	3.2102	0.212523	0.476481	FALSE	-0.248114	3.30237	0.339746	0.668584	FALSE	NA	NA	NA	NA	NA	NA	NA	NA	NA	NA	NA	NA	NA	NA	NA	NA	NA	NA	NA
AC009779.2	-0.27873	2.08094	0.147954	0.376269	FALSE	-0.247353	2.11114	0.126069	0.454276	FALSE	-0.145512	2.11591	0.472883	0.782022	FALSE	NA	NA	NA	NA	NA	NA	NA	NA	NA	NA	NA	NA	NA	NA	NA	NA	NA	NA	NA	NA	NA	NA	NA	NA	NA	NA	NA	NA	NA	NA	NA	NA	NA	NA
AC009951.5	NA	NA	NA	NA	NA	-0.123847	2.02576	0.432251	0.741786	FALSE	NA	NA	NA	NA	NA	NA	NA	NA	NA	NA	NA	NA	NA	NA	NA	NA	NA	NA	NA	NA	NA	NA	NA	NA	NA	NA	NA	NA	NA	NA	NA	NA	NA	NA	NA	NA	NA	NA	NA
AC009961.1	NA	NA	NA	NA	NA	-0.0423547	2.79953	0.69536	0.884488	FALSE	0.0498368	2.34049	0.819655	0.945089	FALSE	NA	NA	NA	NA	NA	-0.0515605	2.51533	0.731118	0.873411	FALSE	NA	NA	NA	NA	NA	NA	NA	NA	NA	NA	NA	NA	NA	NA	NA	NA	NA	NA	NA	NA	NA	NA	NA	NA
AC009974.1	0.0689744	2.72916	0.734681	0.863302	FALSE	-0.0173339	3.26214	0.919049	0.972821	FALSE	-0.119423	2.81355	0.638334	0.863484	FALSE	-0.250892	2.56292	0.260848	0.544992	FALSE	-0.23373	2.87546	0.291112	0.555991	FALSE	-0.281208	3.06965	0.204392	0.544136	FALSE	-0.0205056	2.55788	0.919915	0.966096	FALSE	NA	NA	NA	NA	NA	NA	NA	NA	NA	NA	NA	NA	NA	NA
AC009974.2	0.077413	2.80814	0.788397	0.893058	FALSE	0.121313	3.96984	0.452768	0.755637	FALSE	-0.020019	3.57671	0.942736	0.985186	FALSE	-0.426873	2.6038	0.126886	0.377257	FALSE	-0.146145	3.53153	0.497679	0.71775	FALSE	0.0325197	3.77306	0.888066	0.963536	FALSE	-0.0217772	2.66995	0.946163	0.980253	FALSE	-0.0656716	3.29377	0.813335	0.931693	FALSE	NA	NA	NA	NA	NA	NA	NA	NA	NA
AC010149.1	NA	NA	NA	NA	NA	-0.0491976	2.36173	0.742074	0.90545	FALSE	-0.22678	2.20641	0.204759	0.574412	FALSE	NA	NA	NA	NA	NA	0.150346	2.53984	0.389683	0.637242	FALSE	NA	NA	NA	NA	NA	NA	NA	NA	NA	NA	NA	NA	NA	NA	NA	NA	NA	NA	NA	NA	NA	NA	NA	NA
AC010186.3	NA	NA	NA	NA	NA	NA	NA	NA	NA	NA	NA	NA	NA	NA	NA	NA	NA	NA	NA	NA	0.298211	2.41157	0.156913	0.40251	FALSE	NA	NA	NA	NA	NA	NA	NA	NA	NA	NA	NA	NA	NA	NA	NA	NA	NA	NA	NA	NA	NA	NA	NA	NA
AC010201.3	NA	NA	NA	NA	NA	-0.394578	2.63776	0.00218501	0.0911081	TRUE	-0.619767	2.31955	0.000126162	0.0549915	TRUE	NA	NA	NA	NA	NA	NA	NA	NA	NA	NA	NA	NA	NA	NA	NA	NA	NA	NA	NA	NA	NA	NA	NA	NA	NA	NA	NA	NA	NA	NA	NA	NA	NA	NA
AC010210.1	0.154439	2.70984	0.636988	0.806615	FALSE	0.131558	4.25707	0.530606	0.800663	FALSE	0.0799916	3.70378	0.790372	0.935581	FALSE	0.54925	3.93296	0.0488718	0.233222	FALSE	0.183647	3.40059	0.440445	0.676235	FALSE	0.15688	3.68024	0.501664	0.777409	FALSE	NA	NA	NA	NA	NA	NA	NA	NA	NA	NA	NA	NA	NA	NA	NA	NA	NA	NA	NA
AC010359.3	NA	NA	NA	NA	NA	0.0206715	2.09707	0.884652	0.959876	FALSE	0.0117803	1.96637	0.944749	0.985543	FALSE	-0.195147	2.24014	0.286394	0.568548	FALSE	0.0237104	2.4326	0.884672	0.948072	FALSE	NA	NA	NA	NA	NA	NA	NA	NA	NA	NA	NA	NA	NA	NA	NA	NA	NA	NA	NA	NA	NA	NA	NA	NA
AC010618.3	-0.485534	3.71504	0.0167371	0.131197	FALSE	-0.278024	4.79359	0.0563108	0.332249	FALSE	-0.309283	4.74682	0.168087	0.541981	FALSE	-0.553021	3.84917	0.000546698	0.030685	TRUE	-0.434923	4.76103	0.00276408	0.0525381	TRUE	-0.494831	4.43873	0.00197084	0.0961666	TRUE	-0.397631	3.88156	0.0284746	0.190592	FALSE	-0.467891	4.27579	0.0147698	0.153408	FALSE	NA	NA	NA	NA	NA	NA	NA	NA	NA
AC010642.2	0.360492	3.32474	0.10696	0.315733	FALSE	0.264852	3.21618	0.146644	0.483318	FALSE	0.234898	2.96755	0.283902	0.652447	FALSE	0.194231	3.89435	0.355927	0.63504	FALSE	0.568613	3.21334	0.00539161	0.0743717	TRUE	0.52116	3.59603	0.0128963	0.188511	FALSE	0.237796	3.10562	0.245794	0.521684	FALSE	NA	NA	NA	NA	NA	0.0478396	4.4827	0.838352	0.940245	FALSE	NA	NA	NA	NA
AC010894.3	-0.0414099	3.33434	0.756868	0.874001	FALSE	-0.179906	3.85728	0.0630777	0.345829	FALSE	-0.251584	3.57425	0.118197	0.484196	FALSE	-0.183477	3.7326	0.206699	0.484733	FALSE	-0.0259901	4.05805	0.803814	0.911844	FALSE	-0.250616	3.64739	0.101421	0.420633	FALSE	-0.0550693	3.31155	0.712621	0.863925	FALSE	-0.167091	3.67555	0.2542	0.561679	FALSE	NA	NA	NA	NA	NA	-0.291977	5.69814	0.149039	0.465168
AC010976.1	NA	NA	NA	NA	NA	0.107323	2.25278	0.506747	0.787868	FALSE	NA	NA	NA	NA	NA	NA	NA	NA	NA	NA	NA	NA	NA	NA	NA	NA	NA	NA	NA	NA	NA	NA	NA	NA	NA	NA	NA	NA	NA	NA	NA	NA	NA	NA	NA	NA	NA	NA	NA
AC011092.2	-0.0707261	1.91354	0.778306	0.886269	FALSE	0.0475976	3.14284	0.780665	0.919613	FALSE	0.305122	2.92989	0.198287	0.567735	FALSE	NA	NA	NA	NA	NA	0.217388	3.04137	0.223781	0.489703	FALSE	0.0322921	2.57721	0.912527	0.974339	FALSE	NA	NA	NA	NA	NA	NA	NA	NA	NA	NA	NA	NA	NA	NA	NA	NA	NA	NA	NA
AC011287.1	NA	NA	NA	NA	NA	NA	NA	NA	NA	NA	NA	NA	NA	NA	NA	0.32913	2.95668	0.526223	0.760617	FALSE	NA	NA	NA	NA	NA	NA	NA	NA	NA	NA	NA	NA	NA	NA	NA	NA	NA	NA	NA	NA	NA	NA	NA	NA	NA	NA	NA	NA	NA
AC011377.1	NA	NA	NA	NA	NA	-0.093472	1.22035	0.6293	0.855695	FALSE	NA	NA	NA	NA	NA	NA	NA	NA	NA	NA	NA	NA	NA	NA	NA	NA	NA	NA	NA	NA	NA	NA	NA	NA	NA	NA	NA	NA	NA	NA	NA	NA	NA	NA	NA	NA	NA	NA	NA
AC011476.3	-0.618539	3.57552	0.0014203	0.0445099	TRUE	-0.244827	5.06877	0.00645256	0.135737	FALSE	-0.319878	4.61801	0.0690869	0.397064	FALSE	-0.56929	5.38457	0.00216639	0.0557717	TRUE	-0.263072	4.91959	0.0401716	0.202584	FALSE	-0.388649	4.51178	0.0466057	0.320992	FALSE	-0.477238	3.46134	0.0119127	0.134099	FALSE	-0.468137	4.08436	0.00684596	0.106802	FALSE	-0.460195	5.05611	0.0217104	0.223366	FALSE	NA	NA	NA	NA
AC011511.2	NA	NA	NA	NA	NA	-0.20343	2.9724	0.402559	0.722505	FALSE	0.0434665	3.55379	0.864704	0.958326	FALSE	-0.307856	2.79509	0.388783	0.660593	FALSE	0.169493	3.7592	0.313181	0.577507	FALSE	-0.381193	2.65556	0.122572	0.451235	FALSE	NA	NA	NA	NA	NA	NA	NA	NA	NA	NA	NA	NA	NA	NA	NA	NA	NA	NA	NA
AC011586.1	NA	NA	NA	NA	NA	-0.278773	3.32466	0.158489	0.497204	FALSE	-0.358877	2.50454	0.318127	0.683612	FALSE	-0.88435	2.13888	0.000315352	0.022114	TRUE	NA	NA	NA	NA	NA	-0.627984	2.60678	0.016095	0.208721	FALSE	NA	NA	NA	NA	NA	NA	NA	NA	NA	NA	NA	NA	NA	NA	NA	NA	NA	NA	NA
AC011586.2	-0.794519	6.45481	0.000207697	0.0172365	TRUE	-0.419894	7.92506	0.00880441	0.154181	FALSE	-0.558467	7.1565	0.0160162	0.235121	FALSE	-0.715812	6.76286	0.000320298	0.0222457	TRUE	-1.04379	5.68726	0.00525757	0.072789	TRUE	-0.546844	7.14333	0.00507507	0.130542	FALSE	-0.693013	6.4634	0.00148151	0.047701	TRUE	-0.375482	7.187	0.0349869	0.228621	FALSE	-0.675667	6.86835	0.00397247	0.114241	FALSE	NA	NA	NA	NA
AC011603.2	-0.0778873	2.35221	0.63459	0.804832	FALSE	0.0200857	3.52103	0.866166	0.953675	FALSE	-0.0378871	3.15717	0.800691	0.939108	FALSE	-0.0498802	3.19867	0.814649	0.926885	FALSE	0.117528	3.54865	0.367133	0.62029	FALSE	-0.0716073	3.18438	0.681972	0.871565	FALSE	NA	NA	NA	NA	NA	NA	NA	NA	NA	NA	NA	NA	NA	NA	NA	NA	NA	NA	NA
AC011899.2	-0.257928	1.57833	0.402779	0.634284	FALSE	-0.298661	1.58275	0.293738	0.634247	FALSE	NA	NA	NA	NA	NA	NA	NA	NA	NA	NA	NA	NA	NA	NA	NA	NA	NA	NA	NA	NA	NA	NA	NA	NA	NA	NA	NA	NA	NA	NA	NA	NA	NA	NA	NA	NA	NA	NA	NA
AC011933.4	-0.122191	3.18456	0.649048	0.813542	FALSE	-0.108822	4.36346	0.544974	0.806972	FALSE	0.135323	4.23977	0.581184	0.839461	FALSE	-0.508002	3.34595	0.0368209	0.202234	FALSE	-0.04819	4.43457	0.783411	0.902469	FALSE	-0.282286	4.01573	0.147385	0.479631	FALSE	-0.280247	3.28853	0.24365	0.520173	FALSE	-0.192728	3.91746	0.444739	0.720622	FALSE	NA	NA	NA	NA	NA	NA	NA	NA	NA
AC012146.1	1.15872	2.15598	1.62864e-05	0.0049638	TRUE	0.764545	1.88379	0.00279066	0.100189	FALSE	0.848245	1.75236	0.0035213	0.148699	FALSE	0.849584	2.07192	0.0020572	0.0545318	TRUE	NA	NA	NA	NA	NA	NA	NA	NA	NA	NA	NA	NA	NA	NA	NA	NA	NA	NA	NA	NA	NA	NA	NA	NA	NA	NA	NA	NA	NA
AC012184.3	NA	NA	NA	NA	NA	-0.0779281	1.75821	0.625349	0.854043	FALSE	NA	NA	NA	NA	NA	NA	NA	NA	NA	NA	NA	NA	NA	NA	NA	NA	NA	NA	NA	NA	NA	NA	NA	NA	NA	NA	NA	NA	NA	NA	NA	NA	NA	NA	NA	NA	NA	NA	NA
AC012291.3	NA	NA	NA	NA	NA	-0.58552	2.59438	2.23102e-05	0.0120214	TRUE	NA	NA	NA	NA	NA	-0.550976	2.33351	0.0166957	0.14105	FALSE	NA	NA	NA	NA	NA	NA	NA	NA	NA	NA	NA	NA	NA	NA	NA	NA	NA	NA	NA	NA	NA	NA	NA	NA	NA	NA	NA	NA	NA
AC012358.3	-0.158644	2.77702	0.560168	0.756169	FALSE	0.154329	4.61153	0.426151	0.737093	FALSE	-0.0332122	4.01057	0.880826	0.964705	FALSE	-0.336683	3.64531	0.291594	0.57353	FALSE	0.222364	4.19861	0.246974	0.514479	FALSE	-0.00650571	3.94735	0.979292	0.992521	FALSE	0.14178	2.7635	0.56501	0.778373	FALSE	-0.0211782	3.54851	0.94233	0.980691	FALSE	NA	NA	NA	NA	NA	NA	NA	NA	NA
AC012447.1	NA	NA	NA	NA	NA	NA	NA	NA	NA	NA	NA	NA	NA	NA	NA	0.665072	3.86968	0.0320554	0.191064	FALSE	NA	NA	NA	NA	NA	NA	NA	NA	NA	NA	NA	NA	NA	NA	NA	NA	NA	NA	NA	NA	NA	NA	NA	NA	NA	NA	NA	NA	NA
AC012459.1	NA	NA	NA	NA	NA	0.188811	2.39195	0.358207	0.687163	FALSE	NA	NA	NA	NA	NA	0.227168	2.82072	0.423318	0.687999	FALSE	NA	NA	NA	NA	NA	NA	NA	NA	NA	NA	NA	NA	NA	NA	NA	NA	NA	NA	NA	NA	NA	NA	NA	NA	NA	NA	NA	NA	NA
AC013457.1	0.683195	2.46182	0.503185	0.712583	FALSE	-0.11035	2.833	0.915192	0.971611	FALSE	NA	NA	NA	NA	NA	NA	NA	NA	NA	NA	NA	NA	NA	NA	NA	NA	NA	NA	NA	NA	NA	NA	NA	NA	NA	NA	NA	NA	NA	NA	NA	NA	NA	NA	NA	NA	NA	NA	NA
AC015660.2	0.524163	3.20879	0.186575	0.425355	FALSE	0.48588	4.50133	0.153447	0.491209	FALSE	0.038244	4.22802	0.931388	0.982631	FALSE	0.560495	4.54429	0.0334941	0.195199	FALSE	0.778491	5.06663	0.00182804	0.0437547	TRUE	0.393176	4.09931	0.209514	0.547169	FALSE	0.467115	3.21466	0.203861	0.474892	FALSE	0.613775	3.52227	0.109871	0.388064	FALSE	NA	NA	NA	NA	NA	NA	NA	NA	NA
AC015853.3	NA	NA	NA	NA	NA	0.0565315	2.72975	0.679354	0.879672	FALSE	-0.122055	2.54049	0.493352	0.793104	FALSE	NA	NA	NA	NA	NA	NA	NA	NA	NA	NA	-0.0523062	2.39083	0.8128	0.931051	FALSE	NA	NA	NA	NA	NA	NA	NA	NA	NA	NA	NA	NA	NA	NA	NA	NA	NA	NA	NA
AC015871.1	-0.355423	3.08096	0.0279746	0.165783	FALSE	-0.397839	3.57495	0.0108929	0.169447	FALSE	-0.562819	3.13746	0.00397265	0.153746	FALSE	-0.451025	3.22825	0.00292424	0.0647674	TRUE	-0.211547	3.48287	0.113167	0.341346	FALSE	-0.348015	3.17352	0.0618819	0.349053	FALSE	0.00413596	3.22455	0.979167	0.993216	FALSE	NA	NA	NA	NA	NA	NA	NA	NA	NA	NA	NA	NA	NA	NA
AC015871.7	NA	NA	NA	NA	NA	-0.080319	2.29415	0.540513	0.805298	FALSE	-0.53445	1.98068	0.0046771	0.157149	FALSE	NA	NA	NA	NA	NA	NA	NA	NA	NA	NA	NA	NA	NA	NA	NA	NA	NA	NA	NA	NA	NA	NA	NA	NA	NA	NA	NA	NA	NA	NA	NA	NA	NA	NA
AC015912.3	1.08157	2.90338	0.000973263	0.0372245	TRUE	0.345274	2.68188	0.0706113	0.360627	FALSE	0.488866	3.02465	0.115938	0.481408	FALSE	1.35862	5.23631	0.000140486	0.0155443	TRUE	0.666797	3.4291	0.0035268	0.0585084	TRUE	0.598569	3.08102	0.00682268	0.144418	FALSE	NA	NA	NA	NA	NA	NA	NA	NA	NA	NA	1.30541	4.81842	0.000978955	0.0716248	TRUE	NA	NA	NA	NA
AC015923.1	-0.245989	2.67108	0.289315	0.535067	FALSE	-0.170948	4.02901	0.359265	0.687822	FALSE	-0.600009	3.337	0.0162566	0.236595	FALSE	-0.29366	4.02006	0.0990799	0.333501	FALSE	-0.470596	2.50079	0.0246454	0.159688	FALSE	-0.129118	3.43718	0.52363	0.789576	FALSE	NA	NA	NA	NA	NA	NA	NA	NA	NA	NA	NA	NA	NA	NA	NA	NA	NA	NA	NA
AC016065.1	0.437833	1.81294	0.0776633	0.269765	FALSE	0.0394189	1.55031	0.856156	0.950875	FALSE	NA	NA	NA	NA	NA	NA	NA	NA	NA	NA	NA	NA	NA	NA	NA	NA	NA	NA	NA	NA	NA	NA	NA	NA	NA	NA	NA	NA	NA	NA	NA	NA	NA	NA	NA	NA	NA	NA	NA
AC016747.1	-0.131943	3.03528	0.571784	0.76277	FALSE	-0.182268	2.99044	0.301196	0.639914	FALSE	-0.0985869	3.02157	0.710683	0.89993	FALSE	NA	NA	NA	NA	NA	-0.240237	2.92279	0.156703	0.402294	FALSE	NA	NA	NA	NA	NA	-0.511288	3.20874	0.0191519	0.158546	FALSE	NA	NA	NA	NA	NA	NA	NA	NA	NA	NA	NA	NA	NA	NA
AC016831.1	0.652859	2.08018	0.00265588	0.0570758	TRUE	0.264389	3.3009	0.132318	0.462808	FALSE	0.0643389	3.21235	0.822739	0.945911	FALSE	0.901313	4.68895	3.00624e-05	0.00812667	TRUE	0.407346	4.12958	0.0335323	0.185217	FALSE	NA	NA	NA	NA	NA	NA	NA	NA	NA	NA	NA	NA	NA	NA	NA	0.276599	4.46606	0.197555	0.526149	FALSE	NA	NA	NA	NA
AC016831.5	-0.416465	1.67183	0.0643166	0.246291	FALSE	-0.107792	3.21111	0.466708	0.762912	FALSE	-0.193042	2.91566	0.35816	0.712666	FALSE	-0.0547429	3.27379	0.760814	0.900552	FALSE	-0.130023	3.80913	0.342255	0.601623	FALSE	-0.137135	2.83572	0.536079	0.796613	FALSE	NA	NA	NA	NA	NA	NA	NA	NA	NA	NA	NA	NA	NA	NA	NA	NA	NA	NA	NA
AC016831.7	0.0210994	4.41472	0.907209	0.955898	FALSE	0.0286364	5.76363	0.815376	0.93425	FALSE	-0.0883612	5.51155	0.609915	0.852084	FALSE	0.18537	6.14701	0.257534	0.540557	FALSE	0.0652569	6.27073	0.619864	0.803819	FALSE	0.139543	5.44069	0.389074	0.700288	FALSE	0.253322	4.37998	0.157278	0.418337	FALSE	0.0353116	5.1678	0.842716	0.944053	FALSE	0.262869	6.11241	0.1241	0.435959	FALSE	-0.162908	7.37093	0.452978	0.710549
AC017101.1	-0.0435374	3.09153	0.885171	0.944798	FALSE	-0.00764902	4.21174	0.974416	0.993649	FALSE	-0.237028	4.52462	0.402759	0.740489	FALSE	-0.188588	4.44289	0.415118	0.681572	FALSE	0.106118	4.80932	0.647044	0.822144	FALSE	-0.029592	4.30148	0.896391	0.966139	FALSE	-0.0581651	3.21157	0.838541	0.933065	FALSE	0.11569	3.64131	0.664158	0.855544	FALSE	-0.393172	4.59769	0.16158	0.492106	FALSE	NA	NA	NA	NA
AC018362.1	-0.130931	2.51456	0.517295	0.723032	FALSE	-0.000610328	3.64428	0.995784	0.999004	FALSE	0.176672	3.44227	0.297147	0.665703	FALSE	-0.303271	3.75983	0.261759	0.546127	FALSE	0.120536	3.64454	0.415322	0.657275	FALSE	-0.0384154	3.30049	0.820226	0.933824	FALSE	-0.0758336	2.53586	0.683983	0.848797	FALSE	NA	NA	NA	NA	NA	NA	NA	NA	NA	NA	NA	NA	NA	NA
AC018462.1	NA	NA	NA	NA	NA	0.100092	2.58511	0.40693	0.725847	FALSE	0.227775	2.28021	0.149187	0.521565	FALSE	NA	NA	NA	NA	NA	NA	NA	NA	NA	NA	NA	NA	NA	NA	NA	NA	NA	NA	NA	NA	NA	NA	NA	NA	NA	NA	NA	NA	NA	NA	NA	NA	NA	NA
AC018521.5	-0.0718403	2.84892	0.712751	0.851838	FALSE	-0.239681	2.70825	0.198476	0.539985	FALSE	-0.251415	2.70381	0.226503	0.59853	FALSE	0.012563	2.57281	0.954137	0.983237	FALSE	-0.141878	2.3558	0.459423	0.690174	FALSE	-0.126287	2.82979	0.538823	0.797799	FALSE	0.0126261	2.85292	0.943659	0.979245	FALSE	NA	NA	NA	NA	NA	NA	NA	NA	NA	NA	NA	NA	NA	NA
AC018616.1	0.615701	2.01564	0.0907336	0.291247	FALSE	0.963725	3.41148	0.00566456	0.128816	FALSE	NA	NA	NA	NA	NA	0.648876	3.5332	0.00932959	0.108024	FALSE	NA	NA	NA	NA	NA	NA	NA	NA	NA	NA	NA	NA	NA	NA	NA	NA	NA	NA	NA	NA	NA	NA	NA	NA	NA	NA	NA	NA	NA
AC018647.2	NA	NA	NA	NA	NA	0.0984543	1.75976	0.596241	0.840461	FALSE	0.263274	1.83749	0.223441	0.595999	FALSE	NA	NA	NA	NA	NA	NA	NA	NA	NA	NA	NA	NA	NA	NA	NA	NA	NA	NA	NA	NA	NA	NA	NA	NA	NA	NA	NA	NA	NA	NA	NA	NA	NA	NA
AC018682.1	-0.0780897	2.9876	0.754786	0.873026	FALSE	-0.178305	3.93103	0.177365	0.517397	FALSE	-0.209095	3.99885	0.249267	0.621881	FALSE	-0.261359	3.68356	0.311954	0.59424	FALSE	0.134852	4.28587	0.321946	0.584263	FALSE	-0.301191	3.82061	0.103457	0.423435	FALSE	-0.0475832	2.89689	0.854134	0.940392	FALSE	-0.425005	3.47322	0.0674875	0.31336	FALSE	NA	NA	NA	NA	NA	NA	NA	NA	NA
AC018797.3	NA	NA	NA	NA	NA	-0.102701	1.74793	0.543714	0.806972	FALSE	NA	NA	NA	NA	NA	-0.306822	2.29701	0.173315	0.442875	FALSE	NA	NA	NA	NA	NA	NA	NA	NA	NA	NA	NA	NA	NA	NA	NA	NA	NA	NA	NA	NA	NA	NA	NA	NA	NA	NA	NA	NA	NA
AC018816.1	NA	NA	NA	NA	NA	0.115736	2.74734	0.466035	0.762583	FALSE	0.0589981	2.73125	0.697228	0.894257	FALSE	NA	NA	NA	NA	NA	0.389165	2.66853	0.0218871	0.150105	FALSE	0.17598	2.47975	0.342433	0.670444	FALSE	NA	NA	NA	NA	NA	NA	NA	NA	NA	NA	NA	NA	NA	NA	NA	NA	NA	NA	NA
AC019163.1	0.113124	1.84983	0.51271	0.720107	FALSE	0.132857	2.10776	0.335644	0.669536	FALSE	0.0539297	2.03098	0.760386	0.91944	FALSE	NA	NA	NA	NA	NA	-0.0127331	2.3834	0.936775	0.972451	FALSE	NA	NA	NA	NA	NA	NA	NA	NA	NA	NA	NA	NA	NA	NA	NA	NA	NA	NA	NA	NA	NA	NA	NA	NA
AC020656.1	1.10516	7.00866	0.02043	0.143762	FALSE	0.556449	7.11338	0.137212	0.469079	FALSE	0.564989	7.22685	0.225074	0.597029	FALSE	0.993795	7.14218	0.0120922	0.12301	FALSE	0.850143	6.66254	0.0123491	0.114783	FALSE	0.81197	7.27477	0.0497418	0.326885	FALSE	0.964369	6.74978	0.0191832	0.158546	FALSE	0.944816	7.15944	0.00748636	0.111241	FALSE	0.713718	7.10096	0.113068	0.42055	FALSE	0.505593	6.44518	0.198921	0.520083
AC020909.2	0.609278	1.82363	0.0272517	0.164478	FALSE	0.176033	1.81051	0.469817	0.764807	FALSE	0.409699	1.65827	0.187058	0.555585	FALSE	0.494124	2.33237	0.0167998	0.14105	FALSE	NA	NA	NA	NA	NA	NA	NA	NA	NA	NA	NA	NA	NA	NA	NA	NA	NA	NA	NA	NA	NA	NA	NA	NA	NA	NA	NA	NA	NA
AC020913.1	NA	NA	NA	NA	NA	-0.0896452	2.76309	0.635101	0.858611	FALSE	-0.331877	2.27637	0.194181	0.563124	FALSE	-0.243336	2.32405	0.339606	0.618713	FALSE	0.112794	2.97896	0.582826	0.782055	FALSE	NA	NA	NA	NA	NA	NA	NA	NA	NA	NA	NA	NA	NA	NA	NA	NA	NA	NA	NA	NA	NA	NA	NA	NA
AC020915.2	0.0867438	2.51746	0.528678	0.731999	FALSE	0.083209	2.63001	0.520559	0.795066	FALSE	0.108191	2.32202	0.466086	0.779165	FALSE	-0.0107149	2.62475	0.957961	0.984147	FALSE	NA	NA	NA	NA	NA	0.0695825	2.66104	0.718533	0.891452	FALSE	-0.146654	2.40349	0.357671	0.622244	FALSE	NA	NA	NA	NA	NA	NA	NA	NA	NA	NA	NA	NA	NA	NA
AC020916.1	-0.102636	3.2528	0.553184	0.750496	FALSE	-0.259474	4.23566	0.0666731	0.351836	FALSE	-0.15981	4.14558	0.303284	0.669428	FALSE	-0.0580766	4.74966	0.676046	0.851918	FALSE	-0.00693474	5.04889	0.958304	0.980389	FALSE	-0.0332358	4.04764	0.841701	0.943134	FALSE	-0.111237	3.34141	0.569697	0.781742	FALSE	-0.0364931	3.86072	0.829427	0.939288	FALSE	-0.308377	4.61439	0.151041	0.48102	FALSE	NA	NA	NA	NA
AC021192.1	-1.17868	1.59472	0.00941959	0.0982559	TRUE	-0.752863	3.16258	0.070924	0.361154	FALSE	-0.814976	2.70783	0.0596182	0.374701	FALSE	NA	NA	NA	NA	NA	-0.864763	3.039	0.00346305	0.0578453	TRUE	NA	NA	NA	NA	NA	NA	NA	NA	NA	NA	NA	NA	NA	NA	NA	NA	NA	NA	NA	NA	NA	NA	NA	NA
AC021752.1	NA	NA	NA	NA	NA	0.235722	2.10515	0.114259	0.437339	FALSE	NA	NA	NA	NA	NA	NA	NA	NA	NA	NA	NA	NA	NA	NA	NA	NA	NA	NA	NA	NA	NA	NA	NA	NA	NA	NA	NA	NA	NA	NA	NA	NA	NA	NA	NA	NA	NA	NA	NA
AC022098.1	-0.0621553	2.64399	0.564618	0.75902	FALSE	-0.226578	3.24755	0.0103005	0.164296	FALSE	-0.37162	3.36093	0.00214535	0.117406	FALSE	-0.18683	2.88865	0.28252	0.564754	FALSE	-0.0793104	3.68653	0.491324	0.713372	FALSE	-0.396451	3.16153	0.0160561	0.208718	FALSE	0.142591	2.82939	0.287661	0.562151	FALSE	NA	NA	NA	NA	NA	NA	NA	NA	NA	NA	NA	NA	NA	NA
AC022137.4	NA	NA	NA	NA	NA	0.0702497	2.39278	0.672762	0.877243	FALSE	-0.162395	2.11873	0.517766	0.807239	FALSE	NA	NA	NA	NA	NA	NA	NA	NA	NA	NA	NA	NA	NA	NA	NA	NA	NA	NA	NA	NA	NA	NA	NA	NA	NA	NA	NA	NA	NA	NA	NA	NA	NA	NA
AC022217.3	0.471172	3.21375	0.0284251	0.166195	FALSE	0.22735	3.96535	0.196924	0.538503	FALSE	0.0496469	3.96788	0.793767	0.936689	FALSE	0.429274	5.27161	0.0146194	0.131167	FALSE	0.522204	3.9211	0.0216796	0.149428	FALSE	0.414336	3.90142	0.0317462	0.275014	FALSE	0.333615	3.15339	0.122172	0.365461	FALSE	0.4981	3.59244	0.00768687	0.112793	FALSE	0.0132222	4.94164	0.929408	0.975266	FALSE	NA	NA	NA	NA
AC022509.1	0.216497	2.36755	0.399321	0.630905	FALSE	0.398369	2.89375	0.114053	0.436867	FALSE	0.421451	2.94963	0.134245	0.504379	FALSE	NA	NA	NA	NA	NA	0.366501	2.33403	0.127036	0.363455	FALSE	NA	NA	NA	NA	NA	0.41286	2.56931	0.0933414	0.322442	FALSE	NA	NA	NA	NA	NA	NA	NA	NA	NA	NA	NA	NA	NA	NA
AC022509.2	0.392956	6.76102	0.0888898	0.288692	FALSE	0.521288	7.57656	0.0140184	0.188468	FALSE	0.276842	7.73075	0.280585	0.650548	FALSE	0.174238	6.68403	0.450219	0.705931	FALSE	0.306142	7.06242	0.220172	0.485328	FALSE	0.397087	6.93161	0.0514219	0.329891	FALSE	0.494128	6.85715	0.0106409	0.126746	FALSE	0.563797	7.15557	0.00865793	0.11987	FALSE	0.569629	6.27568	0.0340141	0.261787	FALSE	NA	NA	NA	NA
AC022509.4	NA	NA	NA	NA	NA	-0.114689	2.01417	0.611774	0.84852	FALSE	-0.0942223	2.09492	0.743678	0.912131	FALSE	0.329891	2.37784	0.225302	0.504422	FALSE	NA	NA	NA	NA	NA	NA	NA	NA	NA	NA	NA	NA	NA	NA	NA	NA	NA	NA	NA	NA	NA	NA	NA	NA	NA	NA	NA	NA	NA
AC022509.5	NA	NA	NA	NA	NA	0.465994	2.0764	0.0667649	0.352145	FALSE	NA	NA	NA	NA	NA	NA	NA	NA	NA	NA	NA	NA	NA	NA	NA	NA	NA	NA	NA	NA	NA	NA	NA	NA	NA	NA	NA	NA	NA	NA	NA	NA	NA	NA	NA	NA	NA	NA	NA
AC022816.1	NA	NA	NA	NA	NA	-1.20705	2.29591	0.00808946	0.149001	FALSE	-0.842631	3.79279	0.0266364	0.287334	FALSE	NA	NA	NA	NA	NA	-0.958833	3.98169	0.0031732	0.0554129	TRUE	NA	NA	NA	NA	NA	NA	NA	NA	NA	NA	NA	NA	NA	NA	NA	NA	NA	NA	NA	NA	NA	NA	NA	NA
AC023051.1	NA	NA	NA	NA	NA	-0.179265	2.5606	0.355784	0.685404	FALSE	-0.275652	2.53475	0.314367	0.681251	FALSE	NA	NA	NA	NA	NA	NA	NA	NA	NA	NA	NA	NA	NA	NA	NA	NA	NA	NA	NA	NA	NA	NA	NA	NA	NA	NA	NA	NA	NA	NA	NA	NA	NA	NA
AC023157.3	NA	NA	NA	NA	NA	NA	NA	NA	NA	NA	-0.0771615	1.72021	0.789386	0.935409	FALSE	0.230053	2.73324	0.388232	0.660322	FALSE	0.760205	3.25869	0.00382689	0.0610652	TRUE	NA	NA	NA	NA	NA	NA	NA	NA	NA	NA	NA	NA	NA	NA	NA	NA	NA	NA	NA	NA	NA	NA	NA	NA
AC023194.3	NA	NA	NA	NA	NA	0.214391	2.55998	0.609483	0.847007	FALSE	NA	NA	NA	NA	NA	0.109847	2.86199	0.773591	0.905791	FALSE	NA	NA	NA	NA	NA	NA	NA	NA	NA	NA	NA	NA	NA	NA	NA	NA	NA	NA	NA	NA	NA	NA	NA	NA	NA	NA	NA	NA	NA
AC023389.1	NA	NA	NA	NA	NA	-0.0994719	2.61612	0.627345	0.854815	FALSE	-0.22194	2.24525	0.378317	0.727778	FALSE	NA	NA	NA	NA	NA	NA	NA	NA	NA	NA	NA	NA	NA	NA	NA	NA	NA	NA	NA	NA	NA	NA	NA	NA	NA	NA	NA	NA	NA	NA	NA	NA	NA	NA
AC023424.3	-0.0527475	2.93777	0.812962	0.908123	FALSE	0.102284	4.05102	0.452318	0.755442	FALSE	0.0435659	3.85282	0.827623	0.946623	FALSE	-0.178154	4.26251	0.458444	0.712233	FALSE	0.200094	4.21679	0.182421	0.436196	FALSE	0.0717487	3.90575	0.729535	0.897736	FALSE	-0.068822	2.87504	0.758956	0.890984	FALSE	-0.0773617	3.48975	0.65234	0.849916	FALSE	-0.00979994	4.25144	0.973056	0.991566	FALSE	NA	NA	NA	NA
AC023509.6	-0.0834471	2.37298	0.717751	0.854937	FALSE	-0.0222128	3.69564	0.870774	0.955458	FALSE	0.050847	3.56683	0.788946	0.935266	FALSE	-0.251136	3.15313	0.2178	0.496906	FALSE	0.157634	3.94324	0.255662	0.522289	FALSE	-0.140274	3.51828	0.473684	0.759185	FALSE	-0.227471	2.4114	0.371541	0.631352	FALSE	NA	NA	NA	NA	NA	NA	NA	NA	NA	NA	NA	NA	NA	NA
AC024084.1	NA	NA	NA	NA	NA	-0.770559	2.91127	0.00330817	0.105762	FALSE	NA	NA	NA	NA	NA	-0.386361	2.74513	0.122588	0.371329	FALSE	NA	NA	NA	NA	NA	NA	NA	NA	NA	NA	NA	NA	NA	NA	NA	NA	NA	NA	NA	NA	NA	NA	NA	NA	NA	NA	NA	NA	NA
AC024145.1	0.000997235	2.99324	0.997205	0.998536	FALSE	0.249945	4.64849	0.205678	0.547157	FALSE	0.15316	4.70302	0.543992	0.824033	FALSE	-0.0670914	3.98525	0.797901	0.917562	FALSE	0.322666	4.19046	0.133567	0.371697	FALSE	0.0974944	3.8275	0.731241	0.897929	FALSE	0.144062	3.02386	0.604863	0.803923	FALSE	0.138405	3.92209	0.561605	0.801648	FALSE	NA	NA	NA	NA	NA	NA	NA	NA	NA
AC025034.1	NA	NA	NA	NA	NA	0.0245783	1.58578	0.917934	0.972496	FALSE	0.207928	2.12614	0.486112	0.789705	FALSE	NA	NA	NA	NA	NA	NA	NA	NA	NA	NA	NA	NA	NA	NA	NA	NA	NA	NA	NA	NA	NA	NA	NA	NA	NA	NA	NA	NA	NA	NA	NA	NA	NA	NA
AC025048.2	-0.387147	2.09183	0.0451904	0.208455	FALSE	-0.175221	3.16508	0.200977	0.542857	FALSE	-0.417356	2.59337	0.0635855	0.384255	FALSE	NA	NA	NA	NA	NA	NA	NA	NA	NA	NA	-0.494997	2.69629	0.0168699	0.210564	FALSE	NA	NA	NA	NA	NA	NA	NA	NA	NA	NA	NA	NA	NA	NA	NA	NA	NA	NA	NA
AC025048.4	0.041208	4.56549	0.852344	0.928921	FALSE	-0.286561	4.49317	0.173748	0.512153	FALSE	-0.0442173	4.69379	0.83426	0.947607	FALSE	0.184138	4.60576	0.404787	0.674013	FALSE	-0.0252323	4.65913	0.918251	0.964985	FALSE	-0.282436	4.46354	0.169068	0.506198	FALSE	-0.14844	4.84882	0.410993	0.664709	FALSE	-0.189525	4.32738	0.454932	0.728125	FALSE	0.0285182	4.55032	0.916765	0.971385	FALSE	NA	NA	NA	NA
AC025159.1	-0.0496773	2.77124	0.689817	0.838248	FALSE	-0.109519	3.26769	0.347013	0.679463	FALSE	-0.205615	3.03746	0.111843	0.475252	FALSE	0.123606	2.97672	0.463047	0.715585	FALSE	-0.164838	3.35079	0.144061	0.387233	FALSE	-0.0248813	3.22173	0.891609	0.964026	FALSE	-0.0839406	2.73437	0.602633	0.802437	FALSE	NA	NA	NA	NA	NA	NA	NA	NA	NA	NA	NA	NA	NA	NA
AC025164.1	NA	NA	NA	NA	NA	NA	NA	NA	NA	NA	NA	NA	NA	NA	NA	0.619894	2.55894	0.023237	0.165802	FALSE	0.355279	3.22611	0.279944	0.545268	FALSE	NA	NA	NA	NA	NA	NA	NA	NA	NA	NA	NA	NA	NA	NA	NA	NA	NA	NA	NA	NA	0.193225	5.80024	0.516359	0.760301
AC025165.2	NA	NA	NA	NA	NA	0.0405228	2.03734	0.825291	0.937537	FALSE	NA	NA	NA	NA	NA	NA	NA	NA	NA	NA	NA	NA	NA	NA	NA	NA	NA	NA	NA	NA	NA	NA	NA	NA	NA	NA	NA	NA	NA	NA	NA	NA	NA	NA	NA	NA	NA	NA	NA
AC025171.1	NA	NA	NA	NA	NA	-0.161125	1.86043	0.319906	0.655304	FALSE	NA	NA	NA	NA	NA	NA	NA	NA	NA	NA	NA	NA	NA	NA	NA	NA	NA	NA	NA	NA	NA	NA	NA	NA	NA	NA	NA	NA	NA	NA	NA	NA	NA	NA	NA	NA	NA	NA	NA
AC025171.2	NA	NA	NA	NA	NA	-0.0686563	1.94025	0.778482	0.919342	FALSE	NA	NA	NA	NA	NA	NA	NA	NA	NA	NA	NA	NA	NA	NA	NA	NA	NA	NA	NA	NA	NA	NA	NA	NA	NA	NA	NA	NA	NA	NA	NA	NA	NA	NA	NA	NA	NA	NA	NA
AC025283.2	NA	NA	NA	NA	NA	0.274409	2.08808	0.0471572	0.308735	FALSE	NA	NA	NA	NA	NA	NA	NA	NA	NA	NA	NA	NA	NA	NA	NA	NA	NA	NA	NA	NA	NA	NA	NA	NA	NA	NA	NA	NA	NA	NA	NA	NA	NA	NA	NA	NA	NA	NA	NA
AC025442.2	NA	NA	NA	NA	NA	-0.384512	2.28091	0.00833624	0.151699	FALSE	-0.719385	2.21592	0.000765876	0.0904613	TRUE	-0.397996	2.74385	0.0979524	0.331917	FALSE	-0.125695	2.80015	0.408204	0.65115	FALSE	NA	NA	NA	NA	NA	NA	NA	NA	NA	NA	NA	NA	NA	NA	NA	NA	NA	NA	NA	NA	NA	NA	NA	NA
AC025569.1	NA	NA	NA	NA	NA	0.594925	2.72278	0.0711552	0.361268	FALSE	0.0652159	2.24943	0.872122	0.962133	FALSE	NA	NA	NA	NA	NA	NA	NA	NA	NA	NA	NA	NA	NA	NA	NA	NA	NA	NA	NA	NA	NA	NA	NA	NA	NA	NA	NA	NA	NA	NA	NA	NA	NA	NA
AC025580.2	-1.03483	5.98981	0.0012292	0.0408886	TRUE	-0.617244	7.47956	0.00997418	0.162518	FALSE	-0.668648	7.59073	0.00887277	0.196948	FALSE	-0.964908	6.52401	0.00214816	0.0555987	TRUE	-0.444115	8.01421	0.0145243	0.126717	FALSE	-0.826408	6.6073	0.00806153	0.156026	FALSE	-0.694427	6.34408	0.0102791	0.124305	FALSE	-0.398571	7.0532	0.0490209	0.273288	FALSE	-0.885109	6.01851	0.0184184	0.218601	FALSE	-0.287812	5.99856	0.41563	0.692321
AC025627.1	NA	NA	NA	NA	NA	0.186279	2.47745	0.345971	0.678678	FALSE	NA	NA	NA	NA	NA	NA	NA	NA	NA	NA	NA	NA	NA	NA	NA	NA	NA	NA	NA	NA	NA	NA	NA	NA	NA	NA	NA	NA	NA	NA	NA	NA	NA	NA	NA	NA	NA	NA	NA
AC025682.1	-0.449044	2.49	0.00578469	0.0802075	TRUE	-0.177173	3.28377	0.0912633	0.397996	FALSE	-0.159917	3.22697	0.279513	0.649551	FALSE	-0.316	2.77614	0.0530534	0.243558	FALSE	-0.349915	3.31561	0.0104491	0.104309	FALSE	-0.140646	3.1569	0.383146	0.69647	FALSE	NA	NA	NA	NA	NA	NA	NA	NA	NA	NA	NA	NA	NA	NA	NA	NA	NA	NA	NA
AC026202.2	-0.146243	3.75117	0.416556	0.645715	FALSE	-0.212774	4.33631	0.0924666	0.401358	FALSE	-0.272643	4.45544	0.128505	0.496103	FALSE	-0.370819	4.59831	0.0492369	0.233924	FALSE	0.234493	4.86881	0.133616	0.371697	FALSE	-0.0312631	4.32521	0.842524	0.943506	FALSE	-0.0960672	3.77708	0.590684	0.794657	FALSE	-0.181325	4.12371	0.235009	0.543646	FALSE	-0.31278	4.6243	0.0800876	0.365068	FALSE	0.239998	6.20705	0.187982	0.505871
AC026369.3	-0.21497	6.38148	0.620912	0.795177	FALSE	-0.664999	6.19477	0.077426	0.374609	FALSE	-0.802083	5.67795	0.101796	0.462446	FALSE	0.1311	6.89271	0.686621	0.858633	FALSE	-1.62992	3.77417	0.000160531	0.0124916	TRUE	-0.562418	6.16348	0.129603	0.460725	FALSE	-0.347218	6.05987	0.254099	0.52964	FALSE	-0.555438	6.09577	0.117381	0.395183	FALSE	-0.192376	6.77025	0.649059	0.859237	FALSE	NA	NA	NA	NA
AC026470.2	NA	NA	NA	NA	NA	-0.173756	2.2131	0.312035	0.650255	FALSE	NA	NA	NA	NA	NA	NA	NA	NA	NA	NA	NA	NA	NA	NA	NA	NA	NA	NA	NA	NA	NA	NA	NA	NA	NA	NA	NA	NA	NA	NA	NA	NA	NA	NA	NA	NA	NA	NA	NA
AC026689.1	-0.0881676	3.98989	0.685217	0.83547	FALSE	-0.4276	3.9969	0.0443779	0.299315	FALSE	-0.707541	3.27028	0.006668	0.17806	FALSE	-0.31212	4.87691	0.055676	0.250464	FALSE	NA	NA	NA	NA	NA	-0.356729	4.25874	0.0768143	0.375638	FALSE	-0.24129	3.56642	0.32876	0.596461	FALSE	NA	NA	NA	NA	NA	-0.504525	5.23608	0.0138969	0.190341	FALSE	NA	NA	NA	NA
AC026979.2	0.535285	1.81387	0.0338589	0.18067	FALSE	0.326784	1.74841	0.233449	0.571402	FALSE	0.343833	1.88127	0.207091	0.576685	FALSE	0.632384	3.11849	0.00739773	0.0972124	TRUE	NA	NA	NA	NA	NA	NA	NA	NA	NA	NA	NA	NA	NA	NA	NA	NA	NA	NA	NA	NA	NA	NA	NA	NA	NA	NA	NA	NA	NA
AC027018.1	NA	NA	NA	NA	NA	0.242866	2.43793	0.181308	0.521294	FALSE	-0.102333	2.1029	0.739828	0.910991	FALSE	NA	NA	NA	NA	NA	NA	NA	NA	NA	NA	NA	NA	NA	NA	NA	NA	NA	NA	NA	NA	NA	NA	NA	NA	NA	NA	NA	NA	NA	NA	NA	NA	NA	NA
AC027097.1	NA	NA	NA	NA	NA	0.183235	1.87697	0.199304	0.540962	FALSE	0.254505	1.69067	0.181078	0.553862	FALSE	NA	NA	NA	NA	NA	NA	NA	NA	NA	NA	NA	NA	NA	NA	NA	NA	NA	NA	NA	NA	NA	NA	NA	NA	NA	NA	NA	NA	NA	NA	NA	NA	NA	NA
AC027097.2	-0.403277	2.93196	0.144255	0.371517	FALSE	0.0986045	4.49079	0.618413	0.852605	FALSE	-0.0171343	3.99809	0.954858	0.988971	FALSE	-0.2481	2.56272	0.342129	0.621316	FALSE	-0.599725	4.00562	0.00587904	0.0779175	TRUE	-0.491435	3.55292	0.0493683	0.326742	FALSE	-0.397603	3.12379	0.105015	0.34076	FALSE	-0.300948	4.21763	0.181259	0.48181	FALSE	NA	NA	NA	NA	NA	NA	NA	NA	NA
AC027243.3	NA	NA	NA	NA	NA	-0.163755	2.11345	0.312787	0.650255	FALSE	NA	NA	NA	NA	NA	NA	NA	NA	NA	NA	NA	NA	NA	NA	NA	NA	NA	NA	NA	NA	NA	NA	NA	NA	NA	NA	NA	NA	NA	NA	NA	NA	NA	NA	NA	NA	NA	NA	NA
AC027644.3	0.153169	2.72409	0.537191	0.738638	FALSE	-0.0676838	2.40584	0.762472	0.914255	FALSE	0.0375724	2.56868	0.884345	0.966307	FALSE	0.293663	3.21762	0.143839	0.402131	FALSE	0.187237	2.51739	0.422379	0.662341	FALSE	0.125891	2.7707	0.60864	0.832886	FALSE	0.291895	2.63382	0.187324	0.455459	FALSE	NA	NA	NA	NA	NA	NA	NA	NA	NA	NA	NA	NA	NA	NA
AC027698.1	NA	NA	NA	NA	NA	-0.261778	1.90294	0.395764	0.717408	FALSE	-0.421049	1.98963	0.211254	0.581379	FALSE	NA	NA	NA	NA	NA	NA	NA	NA	NA	NA	NA	NA	NA	NA	NA	NA	NA	NA	NA	NA	NA	NA	NA	NA	NA	NA	NA	NA	NA	NA	NA	NA	NA	NA
AC036214.1	NA	NA	NA	NA	NA	-0.318331	3.01589	0.268881	0.608748	FALSE	-0.531333	3.49192	0.14692	0.518203	FALSE	-0.447847	3.85255	0.0938708	0.325396	FALSE	NA	NA	NA	NA	NA	-0.400491	3.00591	0.205303	0.544877	FALSE	NA	NA	NA	NA	NA	NA	NA	NA	NA	NA	NA	NA	NA	NA	NA	NA	NA	NA	NA
AC040970.1	-0.292414	1.78498	0.191952	0.430767	FALSE	-0.409432	1.88685	0.080649	0.379044	FALSE	-0.173028	2.02342	0.524558	0.810889	FALSE	NA	NA	NA	NA	NA	NA	NA	NA	NA	NA	NA	NA	NA	NA	NA	NA	NA	NA	NA	NA	NA	NA	NA	NA	NA	NA	NA	NA	NA	NA	NA	NA	NA	NA
AC046134.2	NA	NA	NA	NA	NA	-0.482959	2.33568	0.0170026	0.205211	FALSE	-0.535108	2.03885	0.0476872	0.345035	FALSE	NA	NA	NA	NA	NA	NA	NA	NA	NA	NA	NA	NA	NA	NA	NA	NA	NA	NA	NA	NA	NA	NA	NA	NA	NA	NA	NA	NA	NA	NA	NA	NA	NA	NA
AC048341.1	NA	NA	NA	NA	NA	-0.162625	3.09677	0.220391	0.560804	FALSE	-0.284172	3.07381	0.170077	0.544551	FALSE	-0.488459	2.4968	0.014349	0.130768	FALSE	-0.0921143	3.48918	0.572556	0.77528	FALSE	-0.16574	2.63677	0.349131	0.674159	FALSE	NA	NA	NA	NA	NA	NA	NA	NA	NA	NA	NA	NA	NA	NA	NA	NA	NA	NA	NA
AC053513.1	NA	NA	NA	NA	NA	-0.118314	2.49531	0.351687	0.682509	FALSE	0.174953	2.13397	0.323162	0.68776	FALSE	NA	NA	NA	NA	NA	0.291912	2.37225	0.0708055	0.272364	FALSE	NA	NA	NA	NA	NA	NA	NA	NA	NA	NA	NA	NA	NA	NA	NA	NA	NA	NA	NA	NA	NA	NA	NA	NA
AC053527.2	NA	NA	NA	NA	NA	-0.0196414	2.8543	0.910756	0.970166	FALSE	0.107783	2.39887	0.700779	0.895641	FALSE	NA	NA	NA	NA	NA	-0.19362	2.45031	0.271403	0.537113	FALSE	NA	NA	NA	NA	NA	NA	NA	NA	NA	NA	NA	NA	NA	NA	NA	NA	NA	NA	NA	NA	NA	NA	NA	NA
AC055733.2	NA	NA	NA	NA	NA	-0.271342	2.96147	0.0750382	0.370524	FALSE	-0.223238	3.0438	0.358656	0.71299	FALSE	-0.327416	3.40378	0.174006	0.443702	FALSE	0.134513	2.82408	0.528092	0.740884	FALSE	NA	NA	NA	NA	NA	NA	NA	NA	NA	NA	NA	NA	NA	NA	NA	NA	NA	NA	NA	NA	NA	NA	NA	NA
AC058791.1	NA	NA	NA	NA	NA	0.017283	2.76686	0.919087	0.972821	FALSE	-0.0905624	2.84952	0.600331	0.846986	FALSE	0.0427286	3.16918	0.820579	0.928013	FALSE	0.471929	3.52439	0.0022046	0.047669	TRUE	0.0623542	2.96745	0.796965	0.925956	FALSE	NA	NA	NA	NA	NA	NA	NA	NA	NA	NA	NA	NA	NA	NA	NA	0.160231	5.71421	0.444013	0.705109
AC066613.2	-0.465613	2.40293	0.114078	0.328106	FALSE	-0.242399	4.31822	0.110527	0.430717	FALSE	-0.105825	4.02809	0.631467	0.861199	FALSE	-0.712677	2.80568	0.00677008	0.0935026	TRUE	-0.0126268	3.54813	0.956536	0.980311	FALSE	-0.285728	3.48212	0.251855	0.590623	FALSE	-0.256522	2.47647	0.418621	0.669963	FALSE	-0.368392	3.3518	0.118012	0.39612	FALSE	NA	NA	NA	NA	NA	NA	NA	NA	NA
AC067751.1	0.483003	2.1323	0.123173	0.339255	FALSE	0.838988	3.91907	0.0157302	0.199435	FALSE	0.479495	2.90586	0.230343	0.601133	FALSE	NA	NA	NA	NA	NA	0.715066	4.29294	0.00551677	0.0752941	TRUE	0.521962	2.93375	0.0596158	0.344548	FALSE	NA	NA	NA	NA	NA	NA	NA	NA	NA	NA	NA	NA	NA	NA	NA	NA	NA	NA	NA
AC068282.1	-0.29639	3.04013	0.1534	0.383419	FALSE	-0.195957	4.03498	0.197274	0.538823	FALSE	-0.0937613	3.87654	0.648306	0.86793	FALSE	-0.752283	3.59019	0.000609156	0.0323457	TRUE	0.156458	4.23508	0.333639	0.594935	FALSE	-0.170316	3.86967	0.358266	0.67992	FALSE	-0.251642	3.07999	0.204022	0.474892	FALSE	-0.172397	3.51529	0.291569	0.599183	FALSE	NA	NA	NA	NA	NA	NA	NA	NA	NA
AC068413.1	NA	NA	NA	NA	NA	NA	NA	NA	NA	NA	NA	NA	NA	NA	NA	1.05191	5.08498	0.0182556	0.146151	FALSE	NA	NA	NA	NA	NA	NA	NA	NA	NA	NA	NA	NA	NA	NA	NA	NA	NA	NA	NA	NA	NA	NA	NA	NA	NA	NA	NA	NA	NA
AC068533.3	NA	NA	NA	NA	NA	0.128739	2.62834	0.419488	0.732195	FALSE	0.210888	2.35943	0.34624	0.703524	FALSE	NA	NA	NA	NA	NA	0.1207	2.53563	0.45121	0.6836	FALSE	NA	NA	NA	NA	NA	NA	NA	NA	NA	NA	NA	NA	NA	NA	NA	NA	NA	NA	NA	NA	NA	NA	NA	NA
AC068587.4	0.589295	4.37481	0.0808375	0.275378	FALSE	0.422598	5.41809	0.219213	0.559949	FALSE	0.546208	5.05303	0.198322	0.567735	FALSE	0.163574	4.52303	0.460662	0.714154	FALSE	0.711159	5.04332	0.0346023	0.188708	FALSE	0.443173	5.12695	0.135637	0.466428	FALSE	0.43952	4.22979	0.221934	0.493894	FALSE	0.308654	4.59004	0.368056	0.668234	FALSE	0.588415	4.65849	0.0594419	0.322605	FALSE	NA	NA	NA	NA
AC068724.3	-0.0838908	2.70162	0.582689	0.770947	FALSE	0.0553065	3.40274	0.577314	0.827719	FALSE	-0.00622184	3.1753	0.968448	0.992099	FALSE	-0.117966	3.12341	0.53656	0.766491	FALSE	0.02268	3.11777	0.879429	0.945776	FALSE	-0.189708	3.26688	0.227908	0.565088	FALSE	-0.112082	2.70251	0.568176	0.78113	FALSE	0.059401	3.23472	0.721629	0.884939	FALSE	NA	NA	NA	NA	NA	NA	NA	NA	NA
AC068888.1	NA	NA	NA	NA	NA	0.165681	3.05517	0.185334	0.525336	FALSE	0.0246088	2.9296	0.887589	0.966697	FALSE	-0.402965	2.52665	0.0505198	0.237795	FALSE	0.169068	3.12585	0.223227	0.488935	FALSE	-0.107418	2.87666	0.557711	0.80802	FALSE	NA	NA	NA	NA	NA	NA	NA	NA	NA	NA	NA	NA	NA	NA	NA	NA	NA	NA	NA
AC069360.1	0.469083	3.70332	0.0507239	0.219382	FALSE	0.255704	4.118	0.267537	0.607137	FALSE	0.14216	3.55428	0.644038	0.865907	FALSE	0.357258	3.5177	0.0859884	0.311565	FALSE	-0.16118	2.49621	0.526571	0.740506	FALSE	0.36623	3.77847	0.133254	0.465033	FALSE	0.252396	3.70229	0.211749	0.482046	FALSE	0.0993645	3.45777	0.724495	0.887329	FALSE	NA	NA	NA	NA	NA	NA	NA	NA	NA
AC073167.1	NA	NA	NA	NA	NA	-0.147341	2.42293	0.359355	0.687822	FALSE	-0.108202	2.19469	0.596829	0.845537	FALSE	NA	NA	NA	NA	NA	NA	NA	NA	NA	NA	NA	NA	NA	NA	NA	NA	NA	NA	NA	NA	NA	NA	NA	NA	NA	NA	NA	NA	NA	NA	NA	NA	NA	NA
AC073332.1	0.0831122	3.42086	0.449216	0.672583	FALSE	-0.0142109	4.11409	0.889307	0.962499	FALSE	0.0765172	3.89829	0.553702	0.826568	FALSE	0.147858	4.23446	0.340011	0.619334	FALSE	0.181911	4.19241	0.144319	0.387348	FALSE	0.021616	4.10514	0.878121	0.959603	FALSE	0.222472	3.42904	0.0989343	0.331263	FALSE	0.0899608	3.58554	0.553402	0.795952	FALSE	-0.0318723	4.31483	0.845477	0.942339	FALSE	0.798698	5.43679	0.0243737	0.220597
AC073343.2	NA	NA	NA	NA	NA	0.0276959	2.25923	0.824829	0.937537	FALSE	NA	NA	NA	NA	NA	NA	NA	NA	NA	NA	NA	NA	NA	NA	NA	NA	NA	NA	NA	NA	NA	NA	NA	NA	NA	NA	NA	NA	NA	NA	NA	NA	NA	NA	NA	NA	NA	NA	NA
AC073475.1	NA	NA	NA	NA	NA	-0.0879444	2.51129	0.710754	0.891419	FALSE	0.128075	2.09685	0.67286	0.880956	FALSE	NA	NA	NA	NA	NA	NA	NA	NA	NA	NA	NA	NA	NA	NA	NA	NA	NA	NA	NA	NA	NA	NA	NA	NA	NA	NA	NA	NA	NA	NA	NA	NA	NA	NA
AC073593.2	NA	NA	NA	NA	NA	-0.0842003	1.66648	0.83531	0.941947	FALSE	NA	NA	NA	NA	NA	NA	NA	NA	NA	NA	NA	NA	NA	NA	NA	NA	NA	NA	NA	NA	NA	NA	NA	NA	NA	NA	NA	NA	NA	NA	NA	NA	NA	NA	NA	NA	NA	NA	NA
AC073611.1	0.298129	4.05582	0.121922	0.337621	FALSE	0.450548	4.02927	0.0104968	0.166182	FALSE	0.32761	3.65146	0.0871013	0.440546	FALSE	-0.0833394	3.88978	0.662127	0.843715	FALSE	0.413024	4.52024	0.0196507	0.143589	FALSE	0.533213	4.0613	0.00691151	0.144418	FALSE	0.208237	3.92974	0.18086	0.44952	FALSE	0.292862	3.79511	0.0920236	0.357469	FALSE	0.456369	4.59926	0.12295	0.434383	FALSE	NA	NA	NA	NA
AC074032.1	-0.107473	3.0762	0.488886	0.703054	FALSE	-0.0838104	4.21474	0.402654	0.722553	FALSE	-0.154291	3.92116	0.245376	0.617381	FALSE	-0.220258	3.63344	0.228811	0.508867	FALSE	-0.0389432	4.38253	0.714821	0.86223	FALSE	-0.135315	3.89887	0.349284	0.674171	FALSE	-0.115976	3.11045	0.455737	0.700683	FALSE	-0.000151451	3.53744	0.999211	0.999211	FALSE	NA	NA	NA	NA	NA	NA	NA	NA	NA
AC078785.1	NA	NA	NA	NA	NA	NA	NA	NA	NA	NA	0.0825813	2.629	0.666334	0.877147	FALSE	NA	NA	NA	NA	NA	0.436812	2.98571	0.00279539	0.0528092	TRUE	NA	NA	NA	NA	NA	NA	NA	NA	NA	NA	NA	NA	NA	NA	NA	NA	NA	NA	NA	NA	NA	NA	NA	NA
AC078845.1	-0.895403	2.1647	0.000649977	0.0307305	TRUE	-0.468915	3.58824	0.0685922	0.35489	FALSE	-0.722592	2.43925	0.021846	0.269266	FALSE	-0.370319	3.2983	0.143047	0.401556	FALSE	NA	NA	NA	NA	NA	-0.380554	2.96722	0.232126	0.569593	FALSE	NA	NA	NA	NA	NA	NA	NA	NA	NA	NA	NA	NA	NA	NA	NA	NA	NA	NA	NA
AC078881.1	NA	NA	NA	NA	NA	0.473881	2.49922	0.0262711	0.243427	FALSE	0.603129	1.82321	0.0293083	0.295825	FALSE	NA	NA	NA	NA	NA	NA	NA	NA	NA	NA	NA	NA	NA	NA	NA	NA	NA	NA	NA	NA	NA	NA	NA	NA	NA	NA	NA	NA	NA	NA	NA	NA	NA	NA
AC078883.1	NA	NA	NA	NA	NA	0.0470742	2.44244	0.800096	0.928257	FALSE	-0.534499	2.09083	0.0921689	0.449285	FALSE	-0.267404	2.52774	0.17267	0.442164	FALSE	-0.063843	2.31279	0.802977	0.911597	FALSE	NA	NA	NA	NA	NA	NA	NA	NA	NA	NA	NA	NA	NA	NA	NA	NA	NA	NA	NA	NA	NA	NA	NA	NA
AC079142.1	NA	NA	NA	NA	NA	-0.196754	3.8351	0.365622	0.69289	FALSE	-0.525001	3.03515	0.0606994	0.37682	FALSE	-0.297552	2.49161	0.21705	0.496158	FALSE	-0.967394	2.68424	0.000196175	0.0137781	TRUE	-0.0706929	2.87008	0.782836	0.918969	FALSE	NA	NA	NA	NA	NA	NA	NA	NA	NA	NA	NA	NA	NA	NA	NA	NA	NA	NA	NA
AC079209.1	0.491148	2.14452	0.0874564	0.286125	FALSE	0.07653	2.11634	0.741671	0.905308	FALSE	-0.0386346	2.00802	0.89347	0.968762	FALSE	0.676924	3.04824	0.00455822	0.0778851	TRUE	NA	NA	NA	NA	NA	NA	NA	NA	NA	NA	NA	NA	NA	NA	NA	NA	NA	NA	NA	NA	NA	NA	NA	NA	NA	NA	NA	NA	NA
AC079305.1	NA	NA	NA	NA	NA	NA	NA	NA	NA	NA	NA	NA	NA	NA	NA	0.196208	2.30926	0.44219	0.699721	FALSE	NA	NA	NA	NA	NA	NA	NA	NA	NA	NA	NA	NA	NA	NA	NA	NA	NA	NA	NA	NA	NA	NA	NA	NA	NA	NA	NA	NA	NA
AC079447.1	NA	NA	NA	NA	NA	-0.0521784	2.35609	0.736059	0.903287	FALSE	-0.0174775	1.98541	0.943692	0.985543	FALSE	NA	NA	NA	NA	NA	-0.104671	2.62475	0.551451	0.758225	FALSE	NA	NA	NA	NA	NA	NA	NA	NA	NA	NA	NA	NA	NA	NA	NA	NA	NA	NA	NA	NA	NA	NA	NA	NA
AC079781.5	-0.0562211	3.99451	0.606241	0.785111	FALSE	0.157508	4.41861	0.103255	0.420036	FALSE	0.133324	4.22953	0.295894	0.664204	FALSE	-0.0496863	3.87278	0.715453	0.874797	FALSE	0.070991	4.15543	0.52059	0.736201	FALSE	0.0824976	4.32896	0.444556	0.738165	FALSE	-0.00109287	4.03621	0.992417	0.997378	FALSE	-0.0131448	4.21362	0.91066	0.969645	FALSE	-0.266372	4.10635	0.255213	0.592416	FALSE	NA	NA	NA	NA
AC079793.1	NA	NA	NA	NA	NA	-0.204515	3.05257	0.379128	0.703745	FALSE	-0.148133	3.20372	0.59719	0.845839	FALSE	-0.226517	3.29175	0.363315	0.639887	FALSE	0.0908773	3.01209	0.672639	0.836842	FALSE	NA	NA	NA	NA	NA	NA	NA	NA	NA	NA	NA	NA	NA	NA	NA	NA	NA	NA	NA	NA	NA	NA	NA	NA
AC079921.1	NA	NA	NA	NA	NA	-0.213644	1.9569	0.20572	0.547157	FALSE	-0.0205102	2.28252	0.923884	0.979797	FALSE	NA	NA	NA	NA	NA	-0.0341282	2.61047	0.872271	0.942503	FALSE	NA	NA	NA	NA	NA	NA	NA	NA	NA	NA	NA	NA	NA	NA	NA	NA	NA	NA	NA	NA	NA	NA	NA	NA
AC080162.1	-0.398279	1.88978	0.147876	0.376269	FALSE	-0.1729	3.21449	0.33699	0.671382	FALSE	-0.274176	2.9984	0.16642	0.539192	FALSE	-0.466433	2.96991	0.0783143	0.297701	FALSE	-0.0841272	2.83403	0.675971	0.83817	FALSE	-0.297084	2.86796	0.19762	0.538625	FALSE	NA	NA	NA	NA	NA	NA	NA	NA	NA	NA	NA	NA	NA	NA	NA	NA	NA	NA	NA
AC083798.2	NA	NA	NA	NA	NA	-0.0821251	2.77957	0.435165	0.74384	FALSE	-0.212443	2.55182	0.137848	0.508298	FALSE	-0.0134898	2.32369	0.944717	0.979308	FALSE	-0.0244119	2.68468	0.869867	0.94134	FALSE	-0.287862	2.6317	0.141244	0.473254	FALSE	NA	NA	NA	NA	NA	NA	NA	NA	NA	NA	NA	NA	NA	NA	NA	NA	NA	NA	NA
AC083799.1	0.177066	2.1196	0.207619	0.45063	FALSE	0.100517	2.2806	0.445037	0.749704	FALSE	0.174442	2.29172	0.36554	0.719029	FALSE	NA	NA	NA	NA	NA	0.0531925	2.23606	0.741333	0.879219	FALSE	NA	NA	NA	NA	NA	NA	NA	NA	NA	NA	NA	NA	NA	NA	NA	NA	NA	NA	NA	NA	NA	NA	NA	NA
AC083837.1	-0.966392	6.37541	0.00610792	0.0818277	TRUE	-0.537223	7.96826	0.061274	0.340301	FALSE	-0.788328	8.16797	0.0189743	0.25317	FALSE	-0.172571	8.22289	0.50222	0.743994	FALSE	-0.23894	7.49637	0.386605	0.635123	FALSE	-0.366649	7.78285	0.170928	0.509286	FALSE	-0.540507	6.24617	0.0908785	0.318464	FALSE	-0.621218	7.88818	0.0168194	0.161876	FALSE	-0.515966	7.6349	0.115248	0.42123	FALSE	-0.435668	8.3433	0.0771161	0.351134
AC083855.2	-0.138195	5.94213	0.212806	0.455152	FALSE	-0.192193	6.47843	0.0423486	0.293949	FALSE	-0.196941	6.25375	0.111947	0.475252	FALSE	-0.0898686	6.13895	0.37606	0.649344	FALSE	-0.280556	5.95274	0.0066719	0.0831567	TRUE	-0.308106	6.11919	0.0168098	0.210564	FALSE	-0.224394	5.8627	0.0469156	0.234363	FALSE	-0.136033	6.03019	0.225975	0.533271	FALSE	-0.148824	5.96155	0.237013	0.574638	FALSE	NA	NA	NA	NA
AC083862.2	-0.0708459	1.94248	0.798425	0.898573	FALSE	-0.20535	2.23732	0.402106	0.72206	FALSE	-0.0788708	2.00398	0.796603	0.937985	FALSE	NA	NA	NA	NA	NA	NA	NA	NA	NA	NA	NA	NA	NA	NA	NA	NA	NA	NA	NA	NA	NA	NA	NA	NA	NA	NA	NA	NA	NA	NA	NA	NA	NA	NA
AC083862.3	0.0448445	2.96136	0.858991	0.931383	FALSE	-0.212743	3.46875	0.358386	0.687179	FALSE	-0.183257	2.98371	0.496005	0.794205	FALSE	0.143249	3.98239	0.412328	0.678731	FALSE	0.0174735	3.27957	0.937274	0.972654	FALSE	-0.0429977	3.26528	0.844593	0.944684	FALSE	0.0144516	2.75437	0.946588	0.980253	FALSE	0.103825	3.57137	0.606338	0.826253	FALSE	-0.00446129	4.24001	0.9813	0.995737	FALSE	NA	NA	NA	NA
AC083949.1	NA	NA	NA	NA	NA	0.208453	1.6222	0.524742	0.798205	FALSE	NA	NA	NA	NA	NA	NA	NA	NA	NA	NA	NA	NA	NA	NA	NA	NA	NA	NA	NA	NA	NA	NA	NA	NA	NA	NA	NA	NA	NA	NA	NA	NA	NA	NA	NA	NA	NA	NA	NA
AC084198.2	NA	NA	NA	NA	NA	-0.0952251	2.39353	0.580554	0.82977	FALSE	-0.0479111	2.01024	0.817493	0.944063	FALSE	NA	NA	NA	NA	NA	NA	NA	NA	NA	NA	NA	NA	NA	NA	NA	NA	NA	NA	NA	NA	NA	NA	NA	NA	NA	NA	NA	NA	NA	NA	NA	NA	NA	NA
AC084871.1	-0.312633	2.67553	0.358647	0.595989	FALSE	-0.191425	4.05367	0.484229	0.776243	FALSE	-0.0253811	3.86562	0.944971	0.985543	FALSE	-0.509891	3.24554	0.0817676	0.303726	FALSE	-0.258587	3.65088	0.267376	0.532758	FALSE	-0.123054	3.42854	0.712248	0.888129	FALSE	NA	NA	NA	NA	NA	-0.128863	3.6104	0.649631	0.849618	FALSE	NA	NA	NA	NA	NA	NA	NA	NA	NA
AC084871.3	0.477324	3.56732	0.0364983	0.187846	FALSE	0.249579	4.14581	0.139283	0.471813	FALSE	0.2694	4.53522	0.231244	0.602231	FALSE	0.0628748	3.64853	0.808691	0.923809	FALSE	0.359092	3.65065	0.132722	0.370979	FALSE	0.31491	4.18163	0.152679	0.488892	FALSE	0.433233	3.46218	0.0165546	0.150248	FALSE	0.356922	4.15204	0.0797503	0.338669	FALSE	NA	NA	NA	NA	NA	NA	NA	NA	NA
AC087286.2	-0.176448	3.09141	0.43987	0.665327	FALSE	-0.112478	4.32997	0.407765	0.726733	FALSE	-0.223333	4.11775	0.281296	0.650548	FALSE	-0.0259576	4.70439	0.911092	0.965517	FALSE	0.266139	4.35814	0.127396	0.363955	FALSE	0.020872	4.0896	0.911346	0.973871	FALSE	0.0116009	3.01855	0.960704	0.985881	FALSE	-0.0825591	3.74244	0.595444	0.821702	FALSE	-0.28642	4.74007	0.24173	0.57831	FALSE	-0.4101	5.675	0.0928398	0.377081
AC087500.1	NA	NA	NA	NA	NA	-0.448484	2.13767	0.149595	0.486078	FALSE	NA	NA	NA	NA	NA	NA	NA	NA	NA	NA	NA	NA	NA	NA	NA	NA	NA	NA	NA	NA	NA	NA	NA	NA	NA	NA	NA	NA	NA	NA	NA	NA	NA	NA	NA	NA	NA	NA	NA
AC087521.2	NA	NA	NA	NA	NA	-0.415829	2.04879	0.103698	0.420629	FALSE	-0.79552	2.11993	0.0951066	0.45247	FALSE	0.0585122	2.59819	0.760096	0.90012	FALSE	NA	NA	NA	NA	NA	NA	NA	NA	NA	NA	NA	NA	NA	NA	NA	NA	NA	NA	NA	NA	NA	NA	NA	NA	NA	NA	NA	NA	NA
AC087672.2	NA	NA	NA	NA	NA	0.00190441	1.98045	0.995584	0.999004	FALSE	NA	NA	NA	NA	NA	NA	NA	NA	NA	NA	NA	NA	NA	NA	NA	NA	NA	NA	NA	NA	NA	NA	NA	NA	NA	NA	NA	NA	NA	NA	NA	NA	NA	NA	NA	NA	NA	NA	NA
AC087741.1	NA	NA	NA	NA	NA	-0.283461	2.19958	0.13668	0.468469	FALSE	-0.281898	1.80438	0.273826	0.6447	FALSE	NA	NA	NA	NA	NA	-0.533102	2.19022	0.0140411	0.124176	FALSE	NA	NA	NA	NA	NA	NA	NA	NA	NA	NA	NA	NA	NA	NA	NA	NA	NA	NA	NA	NA	NA	NA	NA	NA
AC087854.1	-0.224392	3.34342	0.324989	0.566812	FALSE	0.037129	4.85155	0.748264	0.908294	FALSE	-0.0393862	4.62228	0.811639	0.943036	FALSE	-0.331781	4.07116	0.0883208	0.314863	FALSE	0.221349	4.43096	0.116302	0.346592	FALSE	-0.0833464	4.44113	0.657086	0.859195	FALSE	-0.076284	3.33571	0.695587	0.855164	FALSE	0.117807	4.04082	0.554071	0.796175	FALSE	NA	NA	NA	NA	NA	NA	NA	NA	NA
AC090114.2	NA	NA	NA	NA	NA	0.299863	2.26118	0.0235706	0.233975	FALSE	0.222355	2.14977	0.191055	0.560253	FALSE	-0.131068	2.0407	0.505139	0.746304	FALSE	NA	NA	NA	NA	NA	NA	NA	NA	NA	NA	NA	NA	NA	NA	NA	NA	NA	NA	NA	NA	NA	NA	NA	NA	NA	NA	NA	NA	NA
AC090204.1	0.129772	2.75731	0.407968	0.638567	FALSE	0.15635	3.07524	0.309343	0.647853	FALSE	0.184838	2.81532	0.322584	0.68741	FALSE	0.309022	2.73678	0.152265	0.414543	FALSE	-0.269508	2.66242	0.172169	0.421959	FALSE	0.317103	2.90573	0.061973	0.349226	FALSE	0.0694529	2.73755	0.69382	0.854453	FALSE	NA	NA	NA	NA	NA	NA	NA	NA	NA	NA	NA	NA	NA	NA
AC090517.5	-0.0373067	2.21067	0.795305	0.896926	FALSE	0.0169497	3.11582	0.898567	0.965468	FALSE	0.0351728	2.73798	0.832879	0.947607	FALSE	-0.137739	2.51611	0.498788	0.7415	FALSE	-0.236519	2.73096	0.129463	0.366295	FALSE	NA	NA	NA	NA	NA	NA	NA	NA	NA	NA	NA	NA	NA	NA	NA	NA	NA	NA	NA	NA	NA	NA	NA	NA
AC090559.1	0.00954421	2.12885	0.970291	0.98565	FALSE	-0.323711	3.03511	0.11372	0.436468	FALSE	-0.263217	2.58559	0.363499	0.716961	FALSE	-0.169224	2.7269	0.495	0.738825	FALSE	-0.301153	2.99097	0.0763037	0.282382	FALSE	NA	NA	NA	NA	NA	NA	NA	NA	NA	NA	NA	NA	NA	NA	NA	NA	NA	NA	NA	NA	NA	NA	NA	NA
AC090796.1	-2.21051	3.31427	1.28205e-07	0.000208397	TRUE	-1.61942	4.70502	6.036e-05	0.0245874	TRUE	-2.05983	3.75624	9.19692e-06	0.0211591	TRUE	-1.65173	3.89525	2.54312e-07	0.00122756	TRUE	-2.30199	2.63834	2.42076e-08	0.000232925	TRUE	-1.55092	3.74534	0.000146416	0.0399866	TRUE	-1.3662	3.37205	7.62485e-05	0.0129958	TRUE	-1.56777	3.77369	0.000192636	0.0209946	TRUE	NA	NA	NA	NA	NA	NA	NA	NA	NA
AC090825.1	0.178158	2.90968	0.528126	0.731999	FALSE	0.560594	4.27016	0.0141032	0.188468	FALSE	0.518749	4.02101	0.0590484	0.372736	FALSE	0.101241	3.23186	0.640265	0.830498	FALSE	0.549235	3.6447	0.0660142	0.262475	FALSE	-0.106749	3.70395	0.603499	0.829514	FALSE	0.152139	2.94885	0.571563	0.782947	FALSE	0.162887	3.48086	0.533869	0.783291	FALSE	NA	NA	NA	NA	NA	NA	NA	NA	NA
AC091271.1	NA	NA	NA	NA	NA	NA	NA	NA	NA	NA	NA	NA	NA	NA	NA	0.364998	2.91692	0.171719	0.441218	FALSE	NA	NA	NA	NA	NA	NA	NA	NA	NA	NA	NA	NA	NA	NA	NA	NA	NA	NA	NA	NA	NA	NA	NA	NA	NA	NA	NA	NA	NA
AC091646.1	NA	NA	NA	NA	NA	-0.0801802	2.11516	0.837185	0.943183	FALSE	NA	NA	NA	NA	NA	NA	NA	NA	NA	NA	NA	NA	NA	NA	NA	NA	NA	NA	NA	NA	NA	NA	NA	NA	NA	NA	NA	NA	NA	NA	NA	NA	NA	NA	NA	NA	NA	NA	NA
AC092120.3	NA	NA	NA	NA	NA	-0.134733	2.85073	0.51504	0.792616	FALSE	0.0538059	2.65099	0.831103	0.947094	FALSE	-0.149011	3.00776	0.576188	0.791142	FALSE	0.165316	3.07695	0.388634	0.636175	FALSE	NA	NA	NA	NA	NA	NA	NA	NA	NA	NA	NA	NA	NA	NA	NA	NA	NA	NA	NA	NA	NA	NA	NA	NA
AC092279.1	NA	NA	NA	NA	NA	-0.0947389	2.08945	0.549071	0.809116	FALSE	NA	NA	NA	NA	NA	NA	NA	NA	NA	NA	NA	NA	NA	NA	NA	NA	NA	NA	NA	NA	NA	NA	NA	NA	NA	NA	NA	NA	NA	NA	NA	NA	NA	NA	NA	NA	NA	NA	NA
AC092329.4	NA	NA	NA	NA	NA	-0.505331	2.33287	0.00177067	0.0845044	TRUE	-0.449135	1.93555	0.0885188	0.442225	FALSE	-0.0514185	2.88485	0.768256	0.902829	FALSE	NA	NA	NA	NA	NA	NA	NA	NA	NA	NA	NA	NA	NA	NA	NA	NA	NA	NA	NA	NA	NA	NA	NA	NA	NA	NA	NA	NA	NA
AC092353.2	NA	NA	NA	NA	NA	NA	NA	NA	NA	NA	NA	NA	NA	NA	NA	NA	NA	NA	NA	NA	0.694447	3.36321	0.0293952	0.173614	FALSE	NA	NA	NA	NA	NA	NA	NA	NA	NA	NA	NA	NA	NA	NA	NA	NA	NA	NA	NA	NA	NA	NA	NA	NA
AC092535.4	NA	NA	NA	NA	NA	1.29901	2.06894	0.0109329	0.169447	FALSE	NA	NA	NA	NA	NA	NA	NA	NA	NA	NA	NA	NA	NA	NA	NA	NA	NA	NA	NA	NA	NA	NA	NA	NA	NA	NA	NA	NA	NA	NA	NA	NA	NA	NA	NA	NA	NA	NA	NA
AC092650.1	-0.26339	1.677	0.309815	0.553412	FALSE	-0.0159368	2.80055	0.949888	0.985522	FALSE	0.0244808	2.67629	0.938775	0.983868	FALSE	NA	NA	NA	NA	NA	-0.381378	2.73113	0.107837	0.334712	FALSE	NA	NA	NA	NA	NA	NA	NA	NA	NA	NA	NA	NA	NA	NA	NA	NA	NA	NA	NA	NA	NA	NA	NA	NA
AC092683.1	NA	NA	NA	NA	NA	0.246162	1.59841	0.325933	0.66054	FALSE	NA	NA	NA	NA	NA	NA	NA	NA	NA	NA	NA	NA	NA	NA	NA	NA	NA	NA	NA	NA	NA	NA	NA	NA	NA	NA	NA	NA	NA	NA	NA	NA	NA	NA	NA	NA	NA	NA	NA
AC092691.1	-0.741968	4.76383	0.0444319	0.20773	FALSE	-0.272846	6.92737	0.401907	0.721946	FALSE	-0.919578	4.552	0.0208555	0.262978	FALSE	-0.481034	6.03053	0.0587632	0.256751	FALSE	NA	NA	NA	NA	NA	-0.153178	5.27655	0.641967	0.850237	FALSE	-0.537709	4.45409	0.176252	0.44451	FALSE	-0.284337	4.97131	0.440422	0.718803	FALSE	-0.340405	5.95614	0.426259	0.724101	FALSE	NA	NA	NA	NA
AC092691.3	NA	NA	NA	NA	NA	-0.48668	2.10455	0.214554	0.553763	FALSE	NA	NA	NA	NA	NA	NA	NA	NA	NA	NA	NA	NA	NA	NA	NA	NA	NA	NA	NA	NA	NA	NA	NA	NA	NA	NA	NA	NA	NA	NA	NA	NA	NA	NA	NA	NA	NA	NA	NA
AC092809.2	0.21004	1.59184	0.689738	0.838248	FALSE	NA	NA	NA	NA	NA	NA	NA	NA	NA	NA	NA	NA	NA	NA	NA	NA	NA	NA	NA	NA	NA	NA	NA	NA	NA	NA	NA	NA	NA	NA	NA	NA	NA	NA	NA	NA	NA	NA	NA	NA	NA	NA	NA	NA
AC092821.3	0.87351	4.60528	0.000995421	0.0375211	TRUE	0.574212	4.3371	0.00994974	0.162518	FALSE	0.455465	5.55445	0.0975335	0.454469	FALSE	0.643426	4.90231	0.0221833	0.162118	FALSE	0.70315	6.36437	0.0012825	0.0365073	TRUE	0.600294	4.77941	0.0151708	0.20341	FALSE	0.596855	5.07974	0.0128326	0.135556	FALSE	0.6151	5.02901	0.00891372	0.121008	FALSE	0.809759	4.75571	0.0148247	0.195599	FALSE	1.00232	6.74394	0.00200813	0.0819864
AC092910.3	NA	NA	NA	NA	NA	NA	NA	NA	NA	NA	NA	NA	NA	NA	NA	0.050377	2.48144	0.783725	0.91186	FALSE	NA	NA	NA	NA	NA	NA	NA	NA	NA	NA	NA	NA	NA	NA	NA	NA	NA	NA	NA	NA	NA	NA	NA	NA	NA	NA	NA	NA	NA
AC092944.1	-0.423945	2.68061	0.0684614	0.252154	FALSE	-0.103892	3.82687	0.689151	0.88336	FALSE	-0.0325801	3.24353	0.910586	0.974652	FALSE	-0.229231	3.06719	0.2823	0.564717	FALSE	-0.472916	2.7779	0.0251838	0.161625	FALSE	-0.126727	3.22256	0.522531	0.788567	FALSE	NA	NA	NA	NA	NA	NA	NA	NA	NA	NA	NA	NA	NA	NA	NA	NA	NA	NA	NA
AC093157.1	NA	NA	NA	NA	NA	0.0551412	2.2588	0.716861	0.89415	FALSE	0.3238	1.96716	0.118469	0.484196	FALSE	NA	NA	NA	NA	NA	NA	NA	NA	NA	NA	NA	NA	NA	NA	NA	NA	NA	NA	NA	NA	NA	NA	NA	NA	NA	NA	NA	NA	NA	NA	NA	NA	NA	NA
AC093323.1	NA	NA	NA	NA	NA	0.619562	1.37372	0.00175063	0.0845044	TRUE	NA	NA	NA	NA	NA	NA	NA	NA	NA	NA	NA	NA	NA	NA	NA	NA	NA	NA	NA	NA	NA	NA	NA	NA	NA	NA	NA	NA	NA	NA	NA	NA	NA	NA	NA	NA	NA	NA	NA
AC093334.1	NA	NA	NA	NA	NA	-0.367728	2.42066	0.151157	0.488506	FALSE	NA	NA	NA	NA	NA	NA	NA	NA	NA	NA	NA	NA	NA	NA	NA	NA	NA	NA	NA	NA	NA	NA	NA	NA	NA	NA	NA	NA	NA	NA	NA	NA	NA	NA	NA	NA	NA	NA	NA
AC093583.1	NA	NA	NA	NA	NA	NA	NA	NA	NA	NA	NA	NA	NA	NA	NA	NA	NA	NA	NA	NA	1.10505	3.08848	6.57961e-06	0.00275257	TRUE	NA	NA	NA	NA	NA	NA	NA	NA	NA	NA	NA	NA	NA	NA	NA	NA	NA	NA	NA	NA	NA	NA	NA	NA
AC093673.1	0.152462	2.91081	0.436448	0.662579	FALSE	-0.0323867	2.58195	0.864924	0.953675	FALSE	0.027218	2.68168	0.901936	0.971669	FALSE	0.1665	3.30379	0.384366	0.656407	FALSE	0.337857	2.90265	0.13794	0.377706	FALSE	0.298142	2.95074	0.16418	0.503028	FALSE	0.158018	2.85277	0.36127	0.625162	FALSE	NA	NA	NA	NA	NA	NA	NA	NA	NA	NA	NA	NA	NA	NA
AC093821.1	-0.444216	2.42168	0.0704969	0.25478	FALSE	-0.517212	2.73435	0.0707814	0.361101	FALSE	-0.725463	2.7359	0.0159977	0.235121	FALSE	0.0528896	3.01842	0.826634	0.929253	FALSE	NA	NA	NA	NA	NA	-0.367465	2.6034	0.24875	0.586339	FALSE	NA	NA	NA	NA	NA	NA	NA	NA	NA	NA	NA	NA	NA	NA	NA	NA	NA	NA	NA
AC093827.4	NA	NA	NA	NA	NA	-0.335019	2.10409	0.0419506	0.293949	FALSE	-0.235106	1.66478	0.183324	0.554059	FALSE	-0.105373	2.29346	0.609139	0.809683	FALSE	-0.0341703	2.33288	0.857747	0.935423	FALSE	NA	NA	NA	NA	NA	NA	NA	NA	NA	NA	NA	NA	NA	NA	NA	NA	NA	NA	NA	NA	NA	NA	NA	NA
AC093865.1	NA	NA	NA	NA	NA	0.0949352	4.0335	0.748718	0.908454	FALSE	-0.23182	2.60719	0.47441	0.783144	FALSE	0.133076	2.78403	0.579708	0.79338	FALSE	NA	NA	NA	NA	NA	NA	NA	NA	NA	NA	NA	NA	NA	NA	NA	NA	NA	NA	NA	NA	NA	NA	NA	NA	NA	NA	NA	NA	NA
AC096564.1	-0.183987	1.89354	0.495507	0.707048	FALSE	-0.171171	2.89063	0.458606	0.758862	FALSE	-0.545199	2.52061	0.136964	0.508298	FALSE	0.112109	3.81838	0.660389	0.842658	FALSE	-0.111904	2.39792	0.654132	0.826858	FALSE	NA	NA	NA	NA	NA	NA	NA	NA	NA	NA	NA	NA	NA	NA	NA	NA	NA	NA	NA	NA	NA	NA	NA	NA
AC096667.1	0.185963	2.63041	0.382154	0.614414	FALSE	-0.0864527	2.46586	0.637009	0.859776	FALSE	-0.164486	2.74254	0.470381	0.78099	FALSE	0.263241	2.5933	0.193143	0.46814	FALSE	0.0629867	3.11542	0.788294	0.904453	FALSE	-0.0720625	2.68719	0.748105	0.906653	FALSE	0.117031	2.73391	0.557708	0.773939	FALSE	NA	NA	NA	NA	NA	NA	NA	NA	NA	NA	NA	NA	NA	NA
AC096677.1	-0.520605	2.13341	0.00613722	0.0819949	TRUE	-0.33903	3.09699	0.0342197	0.270075	FALSE	-0.295711	2.65593	0.22443	0.596713	FALSE	NA	NA	NA	NA	NA	NA	NA	NA	NA	NA	-0.397099	2.60825	0.134346	0.465775	FALSE	-0.598269	2.46564	0.000133193	0.0159084	TRUE	NA	NA	NA	NA	NA	NA	NA	NA	NA	NA	NA	NA	NA	NA
AC097376.3	-0.575339	3.15911	0.000636444	0.030532	TRUE	-0.369512	4.4382	0.000288076	0.047672	TRUE	-0.468827	3.9644	0.000356627	0.0805566	TRUE	-0.566957	4.02021	0.0012238	0.0443793	TRUE	-0.103477	4.0243	0.342492	0.601623	FALSE	-0.303564	4.16313	0.0308744	0.272724	FALSE	-0.345236	3.16669	0.0332712	0.201636	FALSE	-0.310262	3.62146	0.0267467	0.20016	FALSE	NA	NA	NA	NA	NA	NA	NA	NA	NA
AC098829.1	-0.429689	2.51238	0.0993523	0.303661	FALSE	-0.311156	4.01529	0.158396	0.497058	FALSE	-0.230157	3.58147	0.369268	0.723137	FALSE	-0.237346	3.74557	0.383278	0.655592	FALSE	-0.163712	3.76468	0.438991	0.675079	FALSE	-0.36388	3.70373	0.0888767	0.399684	FALSE	NA	NA	NA	NA	NA	-0.296928	3.56773	0.132644	0.418658	FALSE	NA	NA	NA	NA	NA	NA	NA	NA	NA
AC099343.3	NA	NA	NA	NA	NA	-0.0213704	1.74475	0.912855	0.970979	FALSE	0.134388	1.9737	0.601107	0.846986	FALSE	0.42125	2.09524	0.210827	0.489132	FALSE	0.0333162	2.5289	0.834845	0.926529	FALSE	NA	NA	NA	NA	NA	NA	NA	NA	NA	NA	NA	NA	NA	NA	NA	NA	NA	NA	NA	NA	NA	NA	NA	NA
AC099489.1	-0.139258	1.8944	0.693529	0.840873	FALSE	0.143558	3.00165	0.682105	0.880309	FALSE	-0.174673	2.67153	0.690557	0.890996	FALSE	0.266069	3.69327	0.318396	0.601409	FALSE	-0.280404	2.66707	0.336014	0.597981	FALSE	NA	NA	NA	NA	NA	NA	NA	NA	NA	NA	NA	NA	NA	NA	NA	NA	NA	NA	NA	NA	NA	NA	NA	NA
AC100800.1	-0.22337	2.83166	0.455829	0.678422	FALSE	0.0400631	4.57272	0.813937	0.933753	FALSE	-0.141322	4.42473	0.561641	0.828704	FALSE	-0.338235	3.74119	0.167197	0.435306	FALSE	0.0189049	3.7235	0.929743	0.969846	FALSE	-0.0641651	4.08108	0.798787	0.926901	FALSE	-0.395428	2.79503	0.144541	0.4002	FALSE	-0.242542	3.44497	0.381581	0.674785	FALSE	NA	NA	NA	NA	NA	NA	NA	NA	NA
AC100810.1	0.140672	5.20398	0.406252	0.636733	FALSE	0.060713	5.01541	0.663256	0.873739	FALSE	0.129919	5.15841	0.438245	0.763025	FALSE	0.222556	4.84587	0.100108	0.33506	FALSE	0.17492	5.40031	0.244232	0.511867	FALSE	-0.00431797	5.10483	0.980079	0.992521	FALSE	0.0219169	5.27236	0.873213	0.949835	FALSE	0.101311	5.10503	0.431212	0.7118	FALSE	0.017437	4.94462	0.920575	0.971681	FALSE	NA	NA	NA	NA
AC100849.1	-0.908152	3.85317	0.0430069	0.203672	FALSE	-1.24299	5.10065	0.0100171	0.162716	FALSE	-0.906653	4.96461	0.0822317	0.43109	FALSE	-0.151967	5.82927	0.690328	0.861778	FALSE	-0.762965	4.70616	0.0594318	0.247985	FALSE	-0.743086	3.96747	0.0595342	0.344548	FALSE	-0.445154	4.05932	0.228673	0.503084	FALSE	-0.611962	4.93134	0.139645	0.42643	FALSE	-0.0704878	4.63567	0.896134	0.964733	FALSE	NA	NA	NA	NA
AC103691.1	NA	NA	NA	NA	NA	-0.000319519	1.97296	0.998465	0.999725	FALSE	0.037163	1.92117	0.829663	0.946882	FALSE	NA	NA	NA	NA	NA	0.197899	2.33301	0.254994	0.521478	FALSE	NA	NA	NA	NA	NA	NA	NA	NA	NA	NA	NA	NA	NA	NA	NA	NA	NA	NA	NA	NA	NA	NA	NA	NA
AC104123.1	-0.626548	2.8765	0.00313354	0.0618653	TRUE	-0.216131	4.46137	0.111939	0.433631	FALSE	-0.460861	4.01958	0.0293915	0.296369	FALSE	-0.0868099	3.72097	0.681556	0.855067	FALSE	-0.176696	3.80941	0.325665	0.587052	FALSE	-0.431064	3.92587	0.0538528	0.333364	FALSE	-0.172314	3.02008	0.398526	0.656108	FALSE	-0.258968	3.57634	0.174609	0.473843	FALSE	NA	NA	NA	NA	NA	NA	NA	NA	NA
AC104162.2	NA	NA	NA	NA	NA	-0.085938	3.517	0.368655	0.69486	FALSE	-0.0117842	3.06226	0.938374	0.983607	FALSE	-0.297349	2.58413	0.076023	0.292751	FALSE	-0.200525	3.50007	0.116909	0.347452	FALSE	-0.227184	2.99701	0.152512	0.488892	FALSE	NA	NA	NA	NA	NA	NA	NA	NA	NA	NA	NA	NA	NA	NA	NA	NA	NA	NA	NA
AC104316.1	NA	NA	NA	NA	NA	-0.050935	2.80284	0.759621	0.912976	FALSE	0.214805	2.65058	0.290783	0.658818	FALSE	-0.165234	2.71638	0.3802	0.652617	FALSE	0.322559	2.67555	0.046331	0.217038	FALSE	0.134137	2.58853	0.477844	0.760935	FALSE	NA	NA	NA	NA	NA	NA	NA	NA	NA	NA	NA	NA	NA	NA	NA	NA	NA	NA	NA
AC104365.1	NA	NA	NA	NA	NA	NA	NA	NA	NA	NA	NA	NA	NA	NA	NA	NA	NA	NA	NA	NA	NA	NA	NA	NA	NA	NA	NA	NA	NA	NA	NA	NA	NA	NA	NA	NA	NA	NA	NA	NA	NA	NA	NA	NA	NA	-0.715358	6.31145	0.0385253	0.269242
AC104806.2	NA	NA	NA	NA	NA	-0.0693355	2.26381	0.69378	0.884236	FALSE	NA	NA	NA	NA	NA	NA	NA	NA	NA	NA	NA	NA	NA	NA	NA	NA	NA	NA	NA	NA	NA	NA	NA	NA	NA	NA	NA	NA	NA	NA	NA	NA	NA	NA	NA	NA	NA	NA	NA
AC104958.1	NA	NA	NA	NA	NA	-0.558013	2.12134	0.0162746	0.200884	FALSE	NA	NA	NA	NA	NA	NA	NA	NA	NA	NA	NA	NA	NA	NA	NA	NA	NA	NA	NA	NA	NA	NA	NA	NA	NA	NA	NA	NA	NA	NA	NA	NA	NA	NA	NA	NA	NA	NA	NA
AC104984.2	NA	NA	NA	NA	NA	0.0164187	1.83311	0.924954	0.975718	FALSE	NA	NA	NA	NA	NA	0.29985	2.19944	0.190834	0.465583	FALSE	NA	NA	NA	NA	NA	NA	NA	NA	NA	NA	NA	NA	NA	NA	NA	NA	NA	NA	NA	NA	NA	NA	NA	NA	NA	NA	NA	NA	NA
AC105052.4	-0.393744	1.90902	0.0760134	0.267059	FALSE	-0.124716	3.27258	0.319497	0.654886	FALSE	-0.119307	2.83533	0.497922	0.795662	FALSE	-0.388483	2.32966	0.0456288	0.224454	FALSE	-0.151075	2.99665	0.297593	0.562686	FALSE	-0.222346	2.8348	0.357386	0.679798	FALSE	NA	NA	NA	NA	NA	NA	NA	NA	NA	NA	NA	NA	NA	NA	NA	NA	NA	NA	NA
AC105446.1	0.787619	1.46162	0.0177849	0.135196	FALSE	NA	NA	NA	NA	NA	NA	NA	NA	NA	NA	NA	NA	NA	NA	NA	NA	NA	NA	NA	NA	NA	NA	NA	NA	NA	NA	NA	NA	NA	NA	NA	NA	NA	NA	NA	NA	NA	NA	NA	NA	NA	NA	NA	NA
AC106707.1	NA	NA	NA	NA	NA	0.460419	1.58566	0.0860018	0.388722	FALSE	NA	NA	NA	NA	NA	NA	NA	NA	NA	NA	NA	NA	NA	NA	NA	NA	NA	NA	NA	NA	NA	NA	NA	NA	NA	NA	NA	NA	NA	NA	NA	NA	NA	NA	NA	NA	NA	NA	NA
AC107029.1	NA	NA	NA	NA	NA	NA	NA	NA	NA	NA	NA	NA	NA	NA	NA	NA	NA	NA	NA	NA	0.418248	2.95303	0.150719	0.395477	FALSE	NA	NA	NA	NA	NA	NA	NA	NA	NA	NA	NA	NA	NA	NA	NA	NA	NA	NA	NA	NA	NA	NA	NA	NA
AC107214.1	-0.132143	1.87533	0.423956	0.6528	FALSE	-0.0769374	2.60493	0.600038	0.843174	FALSE	-0.182975	2.23728	0.350467	0.706226	FALSE	0.129887	2.24348	0.520806	0.757207	FALSE	NA	NA	NA	NA	NA	NA	NA	NA	NA	NA	NA	NA	NA	NA	NA	NA	NA	NA	NA	NA	NA	NA	NA	NA	NA	NA	NA	NA	NA
AC107884.1	0.713601	3.72365	0.150691	0.380184	FALSE	0.663836	4.63026	0.169378	0.506638	FALSE	0.839776	4.14375	0.128622	0.496103	FALSE	0.963486	4.43958	0.0312158	0.189392	FALSE	0.756567	3.20717	0.0783473	0.285639	FALSE	0.776888	4.24846	0.0516958	0.329965	FALSE	0.680996	3.70154	0.085424	0.310637	FALSE	0.771005	3.8462	0.0976516	0.367881	FALSE	NA	NA	NA	NA	NA	NA	NA	NA	NA
AC108134.2	1.2184	2.19531	1.21867e-05	0.0039619	TRUE	0.850345	2.77668	0.00645703	0.135737	FALSE	0.643154	2.77229	0.0548601	0.361834	FALSE	1.39561	4.24607	3.55433e-06	0.00230509	TRUE	0.499736	3.23661	0.0875067	0.302169	FALSE	NA	NA	NA	NA	NA	NA	NA	NA	NA	NA	NA	NA	NA	NA	NA	NA	NA	NA	NA	NA	NA	NA	NA	NA
AC108134.3	NA	NA	NA	NA	NA	-0.121099	2.33843	0.54471	0.806972	FALSE	-0.251738	2.02731	0.372053	0.72468	FALSE	NA	NA	NA	NA	NA	NA	NA	NA	NA	NA	NA	NA	NA	NA	NA	NA	NA	NA	NA	NA	NA	NA	NA	NA	NA	NA	NA	NA	NA	NA	NA	NA	NA	NA
AC108210.1	-0.308179	1.94961	0.0829079	0.277679	FALSE	-0.256929	3.04227	0.103481	0.420193	FALSE	-0.277106	2.55491	0.248476	0.620562	FALSE	-0.286746	2.58534	0.134389	0.388208	FALSE	NA	NA	NA	NA	NA	-0.333084	2.60124	0.0490999	0.325793	FALSE	NA	NA	NA	NA	NA	NA	NA	NA	NA	NA	NA	NA	NA	NA	NA	NA	NA	NA	NA
AC108519.1	NA	NA	NA	NA	NA	-0.641509	2.12307	0.000947628	0.0738609	TRUE	NA	NA	NA	NA	NA	NA	NA	NA	NA	NA	NA	NA	NA	NA	NA	NA	NA	NA	NA	NA	NA	NA	NA	NA	NA	NA	NA	NA	NA	NA	NA	NA	NA	NA	NA	NA	NA	NA	NA
AC108749.1	NA	NA	NA	NA	NA	-0.045817	3.42576	0.906345	0.96902	FALSE	NA	NA	NA	NA	NA	0.313332	3.04846	0.36629	0.642238	FALSE	NA	NA	NA	NA	NA	NA	NA	NA	NA	NA	NA	NA	NA	NA	NA	NA	NA	NA	NA	NA	NA	NA	NA	NA	NA	NA	NA	NA	NA
AC108863.2	NA	NA	NA	NA	NA	-0.370061	1.82852	0.115844	0.439909	FALSE	NA	NA	NA	NA	NA	NA	NA	NA	NA	NA	NA	NA	NA	NA	NA	NA	NA	NA	NA	NA	NA	NA	NA	NA	NA	NA	NA	NA	NA	NA	NA	NA	NA	NA	NA	NA	NA	NA	NA
AC109587.1	NA	NA	NA	NA	NA	-0.0788836	1.93329	0.600885	0.843581	FALSE	NA	NA	NA	NA	NA	NA	NA	NA	NA	NA	0.0805324	2.23532	0.623308	0.806328	FALSE	NA	NA	NA	NA	NA	NA	NA	NA	NA	NA	NA	NA	NA	NA	NA	NA	NA	NA	NA	NA	NA	NA	NA	NA
AC109927.1	NA	NA	NA	NA	NA	NA	NA	NA	NA	NA	NA	NA	NA	NA	NA	-0.00828627	2.80699	0.978961	0.990818	FALSE	NA	NA	NA	NA	NA	NA	NA	NA	NA	NA	NA	NA	NA	NA	NA	NA	NA	NA	NA	NA	NA	NA	NA	NA	NA	NA	NA	NA	NA
AC110048.2	NA	NA	NA	NA	NA	-0.255418	1.86273	0.191728	0.533664	FALSE	NA	NA	NA	NA	NA	NA	NA	NA	NA	NA	NA	NA	NA	NA	NA	NA	NA	NA	NA	NA	NA	NA	NA	NA	NA	NA	NA	NA	NA	NA	NA	NA	NA	NA	NA	NA	NA	NA	NA
AC110795.1	NA	NA	NA	NA	NA	0.0680678	2.13899	0.746241	0.906774	FALSE	NA	NA	NA	NA	NA	NA	NA	NA	NA	NA	NA	NA	NA	NA	NA	NA	NA	NA	NA	NA	NA	NA	NA	NA	NA	NA	NA	NA	NA	NA	NA	NA	NA	NA	NA	NA	NA	NA	NA
AC112220.2	-1.03288	3.81505	3.90002e-06	0.00223746	TRUE	-0.918811	4.2885	5.18852e-06	0.0049956	TRUE	-0.893651	4.15191	0.000155671	0.0584863	TRUE	-0.797812	4.01334	9.36188e-07	0.00182844	TRUE	-0.678122	3.67322	5.52017e-05	0.00817155	TRUE	-0.864413	4.14413	2.7999e-05	0.0247431	TRUE	-0.624837	3.82222	0.00146768	0.047701	TRUE	-0.777058	3.74779	0.000224399	0.0234545	TRUE	NA	NA	NA	NA	NA	NA	NA	NA	NA
AC112496.1	NA	NA	NA	NA	NA	0.141361	1.82116	0.554887	0.813287	FALSE	NA	NA	NA	NA	NA	NA	NA	NA	NA	NA	NA	NA	NA	NA	NA	NA	NA	NA	NA	NA	NA	NA	NA	NA	NA	NA	NA	NA	NA	NA	NA	NA	NA	NA	NA	NA	NA	NA	NA
AC114763.1	-0.576671	1.71611	0.0081807	0.0915372	TRUE	-0.162253	3.25678	0.286068	0.626232	FALSE	-0.553454	2.67158	0.0248084	0.278999	FALSE	-0.354135	3.00209	0.182126	0.453506	FALSE	-0.255047	2.87349	0.300522	0.56488	FALSE	NA	NA	NA	NA	NA	NA	NA	NA	NA	NA	NA	NA	NA	NA	NA	NA	NA	NA	NA	NA	NA	NA	NA	NA
AC116366.2	NA	NA	NA	NA	NA	0.252857	2.08577	0.298356	0.638104	FALSE	0.13468	1.80159	0.652001	0.870045	FALSE	0.0371551	2.92021	0.873936	0.949255	FALSE	NA	NA	NA	NA	NA	NA	NA	NA	NA	NA	NA	NA	NA	NA	NA	NA	NA	NA	NA	NA	NA	NA	NA	NA	NA	NA	NA	NA	NA
AC116534.1	0.30247	3.6538	0.410982	0.640983	FALSE	0.371952	5.2335	0.200062	0.541758	FALSE	0.356329	4.26375	0.372464	0.72468	FALSE	-0.0950987	4.09235	0.706664	0.869669	FALSE	-0.0866348	2.64176	0.852232	0.933475	FALSE	0.0490009	4.73526	0.892715	0.964069	FALSE	0.050533	3.45931	0.872872	0.949778	FALSE	0.132932	3.89147	0.725623	0.88786	FALSE	-0.238002	4.55542	0.411868	0.716698	FALSE	NA	NA	NA	NA
AC118549.1	-0.257909	4.81004	0.0658247	0.24883	FALSE	-0.086391	5.96413	0.359928	0.687887	FALSE	0.0341984	5.43829	0.809827	0.943036	FALSE	-0.306178	4.93498	0.0119718	0.122692	FALSE	-0.0102435	5.61839	0.925564	0.968634	FALSE	-0.168505	5.49541	0.178406	0.516044	FALSE	-0.238958	4.68617	0.0635949	0.27048	FALSE	-0.0900779	5.2461	0.460912	0.731148	FALSE	-0.426505	5.32451	0.0247759	0.235534	FALSE	-0.151179	6.0881	0.41961	0.693501
AC119674.1	-0.136637	4.66337	0.684119	0.835057	FALSE	0.224291	6.36267	0.378453	0.70346	FALSE	0.0318118	5.61025	0.930728	0.982617	FALSE	0.262546	5.87967	0.138577	0.395104	FALSE	0.188096	5.38043	0.590298	0.785513	FALSE	0.230529	5.78838	0.436452	0.731861	FALSE	0.409331	4.51425	0.254389	0.529915	FALSE	0.227664	5.27305	0.431988	0.711945	FALSE	0.707453	6.11186	0.0148685	0.195599	FALSE	NA	NA	NA	NA
AC120193.1	NA	NA	NA	NA	NA	NA	NA	NA	NA	NA	0.0291495	2.7223	0.93787	0.983389	FALSE	NA	NA	NA	NA	NA	0.118925	4.06199	0.716708	0.863747	FALSE	NA	NA	NA	NA	NA	NA	NA	NA	NA	NA	NA	NA	NA	NA	NA	NA	NA	NA	NA	NA	NA	NA	NA	NA
AC123912.1	NA	NA	NA	NA	NA	0.919715	2.44277	0.00878718	0.154181	FALSE	NA	NA	NA	NA	NA	NA	NA	NA	NA	NA	NA	NA	NA	NA	NA	NA	NA	NA	NA	NA	NA	NA	NA	NA	NA	NA	NA	NA	NA	NA	NA	NA	NA	NA	NA	NA	NA	NA	NA
AC124016.1	NA	NA	NA	NA	NA	NA	NA	NA	NA	NA	NA	NA	NA	NA	NA	0.219941	2.18933	0.33246	0.612163	FALSE	NA	NA	NA	NA	NA	NA	NA	NA	NA	NA	NA	NA	NA	NA	NA	NA	NA	NA	NA	NA	NA	NA	NA	NA	NA	NA	NA	NA	NA
AC127035.1	NA	NA	NA	NA	NA	-0.128617	2.77982	0.226105	0.566568	FALSE	-0.17801	2.63433	0.311263	0.678376	FALSE	NA	NA	NA	NA	NA	-0.100458	2.60295	0.479879	0.704193	FALSE	-0.0234399	2.42081	0.903227	0.968964	FALSE	NA	NA	NA	NA	NA	NA	NA	NA	NA	NA	NA	NA	NA	NA	NA	NA	NA	NA	NA
AC127502.2	1.3943	2.85133	2.22944e-05	0.00587668	TRUE	1.05144	3.24552	2.1789e-05	0.0120214	TRUE	1.19833	3.30498	0.000450998	0.0831805	TRUE	1.02449	2.75158	0.00377187	0.0713993	TRUE	0.788693	3.10985	0.00553734	0.0753488	TRUE	1.4421	3.31084	9.30224e-06	0.0170677	TRUE	1.31632	2.93074	4.81233e-05	0.00995561	TRUE	NA	NA	NA	NA	NA	NA	NA	NA	NA	NA	NA	NA	NA	NA
AC131237.1	-0.596647	4.6701	0.0386115	0.193514	FALSE	-0.639121	5.75754	0.0175686	0.209067	FALSE	-0.720883	5.0987	0.0185189	0.250618	FALSE	-0.421074	4.80052	0.155248	0.418505	FALSE	-1.0452	4.42038	0.000581394	0.0237041	TRUE	-0.399524	5.042	0.131703	0.462955	FALSE	-0.581126	4.69383	0.0240356	0.174717	FALSE	-0.664486	4.91527	0.00479124	0.087698	TRUE	0.140216	4.81644	0.712748	0.890515	FALSE	NA	NA	NA	NA
AC131568.1	0.0467586	2.83171	0.853083	0.92948	FALSE	-0.0231929	3.66425	0.899949	0.966239	FALSE	-0.0384413	3.49779	0.869878	0.961304	FALSE	-0.104532	3.03249	0.709986	0.871704	FALSE	0.203141	4.06922	0.19712	0.454733	FALSE	0.146175	3.59505	0.523213	0.789336	FALSE	0.0493214	2.88564	0.842337	0.934887	FALSE	NA	NA	NA	NA	NA	NA	NA	NA	NA	NA	NA	NA	NA	NA
AC131571.1	NA	NA	NA	NA	NA	-0.0825675	2.16112	0.634342	0.858245	FALSE	NA	NA	NA	NA	NA	NA	NA	NA	NA	NA	NA	NA	NA	NA	NA	NA	NA	NA	NA	NA	NA	NA	NA	NA	NA	NA	NA	NA	NA	NA	NA	NA	NA	NA	NA	NA	NA	NA	NA
AC135050.3	-0.307202	1.66545	0.162447	0.395888	FALSE	-0.00730831	3.11797	0.963427	0.989877	FALSE	-0.122675	2.60603	0.524672	0.810889	FALSE	-0.159073	3.47774	0.465024	0.71646	FALSE	-0.0328207	3.20631	0.775596	0.899131	FALSE	-0.15831	2.60089	0.39308	0.703358	FALSE	NA	NA	NA	NA	NA	NA	NA	NA	NA	NA	NA	NA	NA	NA	NA	NA	NA	NA	NA
AC138150.1	-0.328075	1.96416	0.0993068	0.303617	FALSE	-0.120248	3.04453	0.4193	0.732195	FALSE	0.00996681	2.88118	0.953684	0.988669	FALSE	NA	NA	NA	NA	NA	-0.232408	3.10119	0.147479	0.391309	FALSE	-0.54681	2.70967	0.0167265	0.210564	FALSE	NA	NA	NA	NA	NA	NA	NA	NA	NA	NA	NA	NA	NA	NA	NA	NA	NA	NA	NA
AC138207.9	NA	NA	NA	NA	NA	0.0596702	1.99793	0.637505	0.859885	FALSE	0.0880735	2.37195	0.594577	0.84485	FALSE	0.117787	2.38119	0.546877	0.772542	FALSE	0.177447	2.58511	0.261615	0.527076	FALSE	NA	NA	NA	NA	NA	NA	NA	NA	NA	NA	NA	NA	NA	NA	NA	NA	NA	NA	NA	NA	NA	NA	NA	NA
AC139887.2	-0.592558	2.25349	0.00275681	0.0576978	TRUE	-0.205241	3.74316	0.110844	0.43128	FALSE	-0.426943	3.3093	0.016741	0.238923	FALSE	-0.10621	3.24909	0.578571	0.792835	FALSE	-0.457303	3.51337	0.000358296	0.0190471	TRUE	-0.418249	3.12692	0.0285086	0.266526	FALSE	NA	NA	NA	NA	NA	NA	NA	NA	NA	NA	NA	NA	NA	NA	NA	NA	NA	NA	NA
AC147067.1	0.279406	2.07946	0.0726796	0.25984	FALSE	-0.139788	1.80869	0.312561	0.650255	FALSE	0.146562	1.71175	0.431888	0.759359	FALSE	0.0721813	2.19646	0.675543	0.851888	FALSE	NA	NA	NA	NA	NA	NA	NA	NA	NA	NA	NA	NA	NA	NA	NA	NA	NA	NA	NA	NA	NA	NA	NA	NA	NA	NA	NA	NA	NA
AC147651.4	NA	NA	NA	NA	NA	NA	NA	NA	NA	NA	NA	NA	NA	NA	NA	NA	NA	NA	NA	NA	0.942641	3.07345	0.00858547	0.0944713	TRUE	NA	NA	NA	NA	NA	NA	NA	NA	NA	NA	NA	NA	NA	NA	NA	NA	NA	NA	NA	NA	NA	NA	NA	NA
AC211433.1	-0.166348	1.75652	0.608371	0.787007	FALSE	0.0658216	3.23404	0.756445	0.911975	FALSE	0.126145	2.99444	0.647802	0.867678	FALSE	NA	NA	NA	NA	NA	0.162745	3.22702	0.412724	0.654887	FALSE	-0.261399	2.81068	0.274218	0.615206	FALSE	NA	NA	NA	NA	NA	NA	NA	NA	NA	NA	NA	NA	NA	NA	NA	NA	NA	NA	NA
AC240274.1	0.0903563	1.63297	0.728106	0.85992	FALSE	0.228006	2.48746	0.265367	0.605712	FALSE	0.172411	2.02649	0.4792	0.785553	FALSE	NA	NA	NA	NA	NA	NA	NA	NA	NA	NA	NA	NA	NA	NA	NA	NA	NA	NA	NA	NA	NA	NA	NA	NA	NA	NA	NA	NA	NA	NA	NA	NA	NA	NA
AC242426.2	0.168063	2.95237	0.346218	0.58666	FALSE	0.323407	4.01498	0.0337184	0.268922	FALSE	0.256337	3.73092	0.173399	0.547343	FALSE	-0.39705	2.9439	0.0519875	0.240598	FALSE	0.257718	3.5805	0.114915	0.344458	FALSE	0.31101	3.5477	0.134959	0.465805	FALSE	0.0381779	2.91507	0.848988	0.938429	FALSE	0.179183	3.60998	0.285764	0.593528	FALSE	NA	NA	NA	NA	NA	NA	NA	NA	NA
AC243829.1	NA	NA	NA	NA	NA	-0.413792	1.80252	0.254009	0.594494	FALSE	-0.0768577	2.0056	0.806442	0.941592	FALSE	NA	NA	NA	NA	NA	NA	NA	NA	NA	NA	NA	NA	NA	NA	NA	NA	NA	NA	NA	NA	NA	NA	NA	NA	NA	NA	NA	NA	NA	NA	NA	NA	NA	NA
AC243829.4	0.0132583	4.90658	0.967768	0.984731	FALSE	0.133572	5.63471	0.719994	0.89559	FALSE	0.260547	6.10795	0.514458	0.804728	FALSE	-0.417058	5.00411	0.178564	0.449572	FALSE	-0.255296	4.90088	0.439982	0.676006	FALSE	-0.522035	4.70155	0.171853	0.509286	FALSE	-0.270428	5.13878	0.390108	0.648866	FALSE	-0.273652	5.21072	0.433408	0.713101	FALSE	NA	NA	NA	NA	NA	NA	NA	NA	NA
AC243964.3	0.0603598	2.09652	0.758479	0.874774	FALSE	0.0477124	3.07349	0.772119	0.917522	FALSE	-0.137262	3.3819	0.470869	0.78099	FALSE	0.266775	2.88086	0.22087	0.499838	FALSE	0.267891	2.73285	0.190172	0.445976	FALSE	0.145111	2.94294	0.423145	0.723945	FALSE	NA	NA	NA	NA	NA	NA	NA	NA	NA	NA	NA	NA	NA	NA	NA	NA	NA	NA	NA
AC244090.1	0.0840686	5.06059	0.648843	0.813455	FALSE	-0.132723	4.74411	0.418869	0.732135	FALSE	-0.153924	4.68823	0.449518	0.769393	FALSE	0.0148335	4.55719	0.922811	0.970248	FALSE	-0.11785	4.23004	0.486336	0.709987	FALSE	-0.114845	4.93191	0.542275	0.799298	FALSE	-0.00901046	5.01577	0.956243	0.984355	FALSE	-0.137475	4.73441	0.459126	0.729698	FALSE	-0.236155	4.26611	0.240783	0.578085	FALSE	NA	NA	NA	NA
AC244131.2	-0.552256	2.76499	0.0524127	0.221481	FALSE	0.186892	4.54134	0.377591	0.702947	FALSE	-0.026422	4.10708	0.919634	0.978109	FALSE	-0.568328	3.31304	0.0316355	0.190111	FALSE	0.0323922	3.94908	0.868709	0.940767	FALSE	-0.0677752	3.90927	0.822072	0.934929	FALSE	0.0187961	2.87426	0.950133	0.981891	FALSE	-0.0560709	3.79694	0.757835	0.905657	FALSE	NA	NA	NA	NA	NA	-0.368842	5.46424	0.169586	0.485491
AC245060.5	NA	NA	NA	NA	NA	-0.0866335	2.26277	0.752425	0.909792	FALSE	NA	NA	NA	NA	NA	NA	NA	NA	NA	NA	NA	NA	NA	NA	NA	NA	NA	NA	NA	NA	NA	NA	NA	NA	NA	NA	NA	NA	NA	NA	NA	NA	NA	NA	NA	NA	NA	NA	NA
AC245297.3	0.356169	3.58779	0.0326113	0.177093	FALSE	-0.0494856	4.52693	0.709929	0.891315	FALSE	0.0326569	4.44876	0.859078	0.95601	FALSE	0.0293111	4.18456	0.83506	0.93215	FALSE	0.150807	4.22723	0.31399	0.577841	FALSE	-0.219856	4.17522	0.0893264	0.399948	FALSE	-0.0023359	3.55266	0.989392	0.996478	FALSE	-0.021907	4.28726	0.896409	0.964722	FALSE	NA	NA	NA	NA	NA	NA	NA	NA	NA
ACAA1	-0.470294	5.50409	0.0133615	0.116561	FALSE	-0.556399	5.08861	0.000706577	0.0635199	TRUE	-0.588651	5.16028	0.00357955	0.149428	FALSE	-0.310897	5.07549	0.045315	0.223653	FALSE	-0.495764	4.80285	0.00747945	0.0879267	TRUE	-0.395612	5.0076	0.0155369	0.205679	FALSE	-0.474887	5.52173	0.00341975	0.0723972	TRUE	-0.349051	5.3933	0.0160452	0.159027	FALSE	-0.282397	4.80058	0.181748	0.511496	FALSE	NA	NA	NA	NA
ACAA2	-0.153835	6.66761	0.302432	0.547138	FALSE	-0.170758	6.52379	0.164318	0.501573	FALSE	-0.0831435	6.48863	0.546991	0.824144	FALSE	-0.0123353	6.05868	0.936635	0.976141	FALSE	-0.133764	6.55147	0.255916	0.52253	FALSE	-0.0311055	6.34762	0.847287	0.945222	FALSE	-0.187817	6.7162	0.136541	0.387406	FALSE	-0.11694	6.61732	0.350652	0.655715	FALSE	0.0965514	6.40526	0.518557	0.783597	FALSE	NA	NA	NA	NA
ACACA	0.0585169	3.38252	0.628754	0.800416	FALSE	0.264941	4.41484	0.00128486	0.0814849	TRUE	0.238185	4.0476	0.049145	0.347015	FALSE	0.0991383	3.69691	0.441068	0.69953	FALSE	0.146391	4.19469	0.233371	0.498777	FALSE	0.300434	4.07318	0.0550728	0.334551	FALSE	0.0510119	3.45864	0.743751	0.883002	FALSE	0.197343	3.7024	0.233782	0.541781	FALSE	NA	NA	NA	NA	NA	NA	NA	NA	NA
ACACB	-0.859078	1.57428	0.0210888	0.146138	FALSE	-0.577107	2.99037	0.153253	0.491209	FALSE	NA	NA	NA	NA	NA	NA	NA	NA	NA	NA	NA	NA	NA	NA	NA	NA	NA	NA	NA	NA	NA	NA	NA	NA	NA	NA	NA	NA	NA	NA	NA	NA	NA	NA	NA	NA	NA	NA	NA
ACAD10	-0.346349	2.45802	0.0694758	0.254147	FALSE	0.0233856	3.85881	0.856166	0.950875	FALSE	0.006569	3.29676	0.975322	0.993775	FALSE	NA	NA	NA	NA	NA	-0.201951	3.49525	0.139541	0.380689	FALSE	-0.312682	3.07426	0.196335	0.537023	FALSE	NA	NA	NA	NA	NA	NA	NA	NA	NA	NA	NA	NA	NA	NA	NA	NA	NA	NA	NA
ACAD11	-0.172385	2.02037	0.334368	0.574743	FALSE	0.279471	3.46649	0.00878117	0.154181	FALSE	0.128288	2.96806	0.405547	0.742612	FALSE	-0.324917	2.62002	0.132252	0.38438	FALSE	-0.093334	2.91542	0.657457	0.829319	FALSE	-0.044319	2.87082	0.792889	0.924487	FALSE	NA	NA	NA	NA	NA	NA	NA	NA	NA	NA	NA	NA	NA	NA	NA	NA	NA	NA	NA
ACAD8	0.00749463	2.43532	0.966297	0.983909	FALSE	0.149799	2.5264	0.218956	0.55973	FALSE	0.329523	2.41583	0.139177	0.510553	FALSE	NA	NA	NA	NA	NA	0.0772605	2.34768	0.554883	0.760879	FALSE	NA	NA	NA	NA	NA	0.112863	2.51459	0.521875	0.747232	FALSE	NA	NA	NA	NA	NA	NA	NA	NA	NA	NA	NA	NA	NA	NA
ACAD9	-0.0818373	3.28226	0.609297	0.787623	FALSE	-0.150926	3.7096	0.158362	0.497058	FALSE	-0.206447	3.44682	0.256088	0.628707	FALSE	-0.130518	2.97683	0.334115	0.613454	FALSE	-0.176488	3.48504	0.193604	0.450291	FALSE	0.00604026	3.30556	0.972897	0.9908	FALSE	-0.347193	3.27306	0.0190793	0.158546	FALSE	-0.0518816	3.41652	0.688293	0.866864	FALSE	NA	NA	NA	NA	NA	NA	NA	NA	NA
ACADM	-0.108861	4.94929	0.524965	0.729551	FALSE	-0.166983	5.13407	0.218028	0.558607	FALSE	-0.188826	4.92045	0.20432	0.573682	FALSE	-0.0440961	4.48507	0.821695	0.928013	FALSE	-0.216576	4.70578	0.104743	0.330329	FALSE	-0.23319	4.89102	0.11319	0.438602	FALSE	-0.175332	4.8983	0.205774	0.477291	FALSE	-0.156731	5.04941	0.291616	0.599183	FALSE	-0.365082	4.46443	0.0619399	0.329699	FALSE	NA	NA	NA	NA
ACADS	0.310475	4.03793	0.0499411	0.217422	FALSE	0.130378	3.78259	0.291907	0.632356	FALSE	0.275414	3.72311	0.0744417	0.409733	FALSE	0.148136	3.61874	0.444063	0.701519	FALSE	0.089652	3.31406	0.461407	0.691213	FALSE	0.334068	3.64167	0.0383238	0.295447	FALSE	0.0977343	4.00076	0.493342	0.730878	FALSE	0.108121	3.91926	0.450858	0.725461	FALSE	NA	NA	NA	NA	NA	NA	NA	NA	NA
ACADSB	-0.325747	2.19801	0.0138796	0.118663	FALSE	-0.232843	2.88712	0.019814	0.218366	FALSE	-0.186535	2.70266	0.280153	0.650183	FALSE	NA	NA	NA	NA	NA	-0.313218	2.35174	0.0231991	0.154372	FALSE	-0.38099	2.58673	0.0157037	0.207289	FALSE	NA	NA	NA	NA	NA	NA	NA	NA	NA	NA	NA	NA	NA	NA	NA	NA	NA	NA	NA
ACADVL	-0.0921965	7.15911	0.489173	0.703259	FALSE	-0.124587	6.78497	0.200135	0.541758	FALSE	-0.167057	6.8954	0.136906	0.508298	FALSE	-0.00232607	6.49141	0.985422	0.993881	FALSE	-0.116297	6.99391	0.262818	0.527804	FALSE	0.10367	6.71192	0.455892	0.74752	FALSE	-0.244681	7.23568	0.0406507	0.220141	FALSE	-0.0237199	7.05584	0.81067	0.930168	FALSE	-0.0320282	6.58735	0.830764	0.937306	FALSE	0.0396462	7.11343	0.810483	0.917672
ACAP2	-0.228938	7.20196	0.0485846	0.215398	FALSE	-0.100822	8.00825	0.165757	0.502587	FALSE	-0.131725	7.66988	0.225738	0.597882	FALSE	-0.288628	7.40482	0.00308642	0.0651997	TRUE	-0.201191	7.84226	0.00782964	0.0900432	TRUE	-0.197314	7.62665	0.0559956	0.336634	FALSE	-0.275454	7.138	0.00479058	0.0872006	TRUE	-0.159671	7.46742	0.078048	0.335366	FALSE	-0.307254	7.5715	0.0161631	0.201342	FALSE	-0.253141	6.82388	0.160881	0.47664
ACAP3	NA	NA	NA	NA	NA	-0.103169	1.89189	0.459072	0.758862	FALSE	0.17492	1.77597	0.344608	0.702831	FALSE	NA	NA	NA	NA	NA	NA	NA	NA	NA	NA	NA	NA	NA	NA	NA	NA	NA	NA	NA	NA	NA	NA	NA	NA	NA	NA	NA	NA	NA	NA	NA	NA	NA	NA
ACAT1	0.0734923	5.22611	0.495245	0.706985	FALSE	0.0289207	5.36365	0.754139	0.910833	FALSE	0.0473708	5.29466	0.689323	0.890763	FALSE	0.116378	4.74808	0.345732	0.625622	FALSE	-0.177755	4.77979	0.100103	0.321721	FALSE	0.0268916	5.06163	0.805353	0.92853	FALSE	0.010092	5.2508	0.927763	0.971287	FALSE	-0.00387665	5.33695	0.971334	0.989335	FALSE	0.0673141	4.7846	0.712476	0.890515	FALSE	NA	NA	NA	NA
ACAT2	-0.492119	4.08265	0.0249299	0.157623	FALSE	-0.543562	4.13219	0.0135267	0.185818	FALSE	-0.625649	4.21071	0.00142375	0.10068	FALSE	-0.137052	4.60803	0.484702	0.731334	FALSE	-0.179139	4.6226	0.33469	0.596478	FALSE	-0.365223	4.16519	0.0515096	0.329965	FALSE	-0.220332	3.8622	0.263911	0.538986	FALSE	-0.236618	4.06317	0.253985	0.561679	FALSE	NA	NA	NA	NA	NA	NA	NA	NA	NA
ACBD3	-0.0116485	6.69171	0.932431	0.967519	FALSE	-0.1407	7.09525	0.113916	0.436656	FALSE	-0.199534	6.85285	0.124371	0.489477	FALSE	0.111957	7.15478	0.359	0.636629	FALSE	-0.0318321	6.75138	0.713135	0.861419	FALSE	0.0756418	7.01556	0.535465	0.796613	FALSE	-0.0841887	6.57028	0.40247	0.658992	FALSE	-0.00853152	6.72403	0.929378	0.97571	FALSE	0.0311941	7.44287	0.80165	0.925043	FALSE	0.100098	6.06487	0.556372	0.78585
ACBD5	-0.162842	5.31975	0.248173	0.491379	FALSE	-0.0644398	5.6979	0.580135	0.829515	FALSE	-0.0277271	5.62677	0.847345	0.952398	FALSE	-0.211674	5.14013	0.0590816	0.257102	FALSE	-0.131863	5.5724	0.24067	0.506945	FALSE	-0.0354295	5.54908	0.739952	0.902342	FALSE	-0.181463	5.26785	0.114529	0.354023	FALSE	0.0826737	5.70848	0.398721	0.686385	FALSE	-0.152254	5.55871	0.363019	0.675112	FALSE	NA	NA	NA	NA
ACBD6	-0.146887	5.11372	0.212731	0.455092	FALSE	0.168733	6.05931	0.0533065	0.322537	FALSE	0.100534	5.77225	0.459633	0.775535	FALSE	-0.171906	5.03327	0.0667419	0.273367	FALSE	-0.165805	5.89801	0.0764466	0.282758	FALSE	-0.110414	5.67917	0.329129	0.661984	FALSE	-0.118624	5.17743	0.267558	0.541614	FALSE	0.00270269	5.46437	0.979825	0.992264	FALSE	-0.306408	5.32451	0.116563	0.423158	FALSE	-0.0222741	5.98486	0.92356	0.964769
ACD	0.462177	2.23196	0.020881	0.145466	FALSE	0.123456	1.78874	0.444792	0.749649	FALSE	NA	NA	NA	NA	NA	-0.000983926	1.86432	0.995873	0.997526	FALSE	0.0741211	2.04806	0.651166	0.824953	FALSE	NA	NA	NA	NA	NA	NA	NA	NA	NA	NA	NA	NA	NA	NA	NA	NA	NA	NA	NA	NA	NA	NA	NA	NA
ACE	0.193798	3.02889	0.382206	0.614414	FALSE	0.0265799	3.32531	0.897079	0.964466	FALSE	-0.0833908	3.01817	0.787033	0.934329	FALSE	0.0647707	2.6945	0.772355	0.904899	FALSE	0.247396	3.41179	0.109437	0.336103	FALSE	-0.183566	2.76772	0.503501	0.778836	FALSE	0.0499734	3.06059	0.823744	0.926934	FALSE	NA	NA	NA	NA	NA	NA	NA	NA	NA	NA	NA	NA	NA	NA
ACER3	-0.102396	6.82179	0.358136	0.595674	FALSE	-0.0254469	7.7421	0.795479	0.927037	FALSE	-0.140543	7.12008	0.222229	0.5947	FALSE	-0.0245562	7.42792	0.835401	0.93215	FALSE	-0.194308	7.027	0.0958685	0.315579	FALSE	-0.101123	7.15812	0.413447	0.718636	FALSE	-0.184298	6.67323	0.0932983	0.322421	FALSE	-0.110442	7.03458	0.31323	0.619573	FALSE	-0.0288998	7.44769	0.798048	0.923263	FALSE	-0.486348	6.01694	0.00927439	0.143393
ACIN1	-0.133355	5.87583	0.212247	0.454586	FALSE	-0.107054	6.47063	0.130904	0.460597	FALSE	-0.0501562	6.22809	0.630392	0.86077	FALSE	-0.092457	6.02239	0.37183	0.646349	FALSE	-0.0493216	6.55001	0.444574	0.679429	FALSE	-0.0661474	6.2333	0.519878	0.786729	FALSE	-0.161499	5.81502	0.0807806	0.300994	FALSE	-0.0636819	6.18312	0.4116	0.695102	FALSE	-0.188001	6.35515	0.158634	0.489011	FALSE	-0.329959	6.57478	0.0288977	0.236948
ACLY	0.00541451	4.38616	0.958113	0.980273	FALSE	0.0937212	4.8815	0.292599	0.632819	FALSE	0.133505	4.65575	0.242128	0.613883	FALSE	-0.208221	4.18378	0.12154	0.37014	FALSE	-0.0876437	4.72214	0.341336	0.600647	FALSE	-0.0797608	4.60451	0.523814	0.789724	FALSE	-0.0629743	4.43318	0.518669	0.745389	FALSE	0.087081	4.63701	0.414989	0.697654	FALSE	NA	NA	NA	NA	NA	NA	NA	NA	NA
ACO1	-0.155831	8.07005	0.342949	0.583121	FALSE	-0.0340668	8.59548	0.774024	0.91788	FALSE	-0.0219036	8.26824	0.892047	0.968628	FALSE	-0.265418	7.56359	0.0417115	0.214421	FALSE	-0.237327	7.28705	0.209672	0.472364	FALSE	-0.115317	8.18205	0.379506	0.6947	FALSE	-0.142386	8.01876	0.258179	0.532923	FALSE	-0.0109397	8.10419	0.931428	0.976097	FALSE	-0.224661	7.81807	0.15406	0.485431	FALSE	NA	NA	NA	NA
ACO2	-0.0586727	5.32665	0.619714	0.794885	FALSE	-0.0674276	5.61653	0.394169	0.715812	FALSE	-0.161912	5.42297	0.136069	0.508116	FALSE	-0.141746	5.30821	0.221145	0.499949	FALSE	-0.0436714	5.75358	0.614359	0.801175	FALSE	-0.0534044	5.48227	0.567456	0.812034	FALSE	-0.120588	5.33794	0.200451	0.471298	FALSE	0.034852	5.35219	0.738579	0.895082	FALSE	0.106498	5.401	0.480416	0.757436	FALSE	-0.198904	5.69171	0.280884	0.604086
ACOD1	NA	NA	NA	NA	NA	NA	NA	NA	NA	NA	-0.222151	3.65377	0.823289	0.945911	FALSE	0.468534	3.23221	0.405944	0.675145	FALSE	NA	NA	NA	NA	NA	NA	NA	NA	NA	NA	NA	NA	NA	NA	NA	-0.427988	4.62029	0.553996	0.796175	FALSE	NA	NA	NA	NA	NA	NA	NA	NA	NA
ACOT1	-0.450326	2.09162	0.16367	0.397477	FALSE	-0.557568	2.4929	0.0820422	0.381907	FALSE	-0.13504	2.1034	0.750384	0.914258	FALSE	NA	NA	NA	NA	NA	NA	NA	NA	NA	NA	NA	NA	NA	NA	NA	NA	NA	NA	NA	NA	NA	NA	NA	NA	NA	NA	NA	NA	NA	NA	NA	NA	NA	NA
ACOT11	NA	NA	NA	NA	NA	NA	NA	NA	NA	NA	NA	NA	NA	NA	NA	NA	NA	NA	NA	NA	-0.0430234	2.60046	0.8515	0.933265	FALSE	NA	NA	NA	NA	NA	NA	NA	NA	NA	NA	NA	NA	NA	NA	NA	NA	NA	NA	NA	NA	NA	NA	NA	NA
ACOT13	0.00308617	6.24146	0.985978	0.993927	FALSE	-0.0216019	6.10676	0.877758	0.957694	FALSE	0.0929768	5.83779	0.598728	0.846493	FALSE	-0.187246	5.69668	0.150543	0.412999	FALSE	0.02829	6.23948	0.806875	0.912845	FALSE	0.0383919	5.8904	0.779249	0.918136	FALSE	-0.26367	6.19397	0.116093	0.356594	FALSE	-0.111386	6.16373	0.430596	0.711782	FALSE	-0.171918	5.65027	0.360829	0.673641	FALSE	-0.0223963	5.74843	0.901214	0.95595
ACOT2	0.130794	4.5985	0.585089	0.77207	FALSE	0.00944339	4.65553	0.96505	0.990344	FALSE	0.236388	4.59106	0.391022	0.733592	FALSE	0.137788	3.96431	0.423739	0.688185	FALSE	0.0326526	3.86613	0.847108	0.93089	FALSE	0.129251	4.40956	0.55096	0.804082	FALSE	-0.04447	4.63188	0.840158	0.933929	FALSE	0.181347	4.54158	0.386334	0.677439	FALSE	-0.2441	4.21954	0.335268	0.652474	FALSE	NA	NA	NA	NA
ACOT4	0.248385	5.20117	0.208737	0.45178	FALSE	0.159229	4.84411	0.322535	0.657769	FALSE	0.315238	4.81093	0.105323	0.466951	FALSE	-0.048958	3.95555	0.800842	0.918969	FALSE	-0.384331	3.66802	0.0905899	0.307354	FALSE	0.368265	4.8606	0.0773065	0.377091	FALSE	0.0228589	5.32581	0.878085	0.95079	FALSE	0.185828	4.94672	0.243186	0.55264	FALSE	0.264812	4.58585	0.162282	0.493161	FALSE	NA	NA	NA	NA
ACOT7	0.114537	5.5467	0.621878	0.795747	FALSE	-0.240694	5.37999	0.230259	0.569252	FALSE	-0.310755	5.02368	0.267617	0.64011	FALSE	-0.124745	5.63769	0.405986	0.675145	FALSE	-0.610617	4.26196	0.00048655	0.0217748	TRUE	0.0158395	5.36467	0.941913	0.983286	FALSE	-0.16493	5.51964	0.45865	0.703094	FALSE	-0.119756	5.20535	0.58071	0.812428	FALSE	-0.231141	5.3019	0.332487	0.649687	FALSE	NA	NA	NA	NA
ACOT8	0.262126	3.1041	0.199889	0.440768	FALSE	0.147176	3.06928	0.398511	0.719655	FALSE	0.206322	2.94186	0.323581	0.68776	FALSE	0.0655121	2.71438	0.66343	0.84439	FALSE	-0.00897691	3.01364	0.951471	0.979255	FALSE	-0.0467274	2.99148	0.789685	0.923581	FALSE	-0.0674769	3.16445	0.732885	0.876186	FALSE	NA	NA	NA	NA	NA	NA	NA	NA	NA	NA	NA	NA	NA	NA
ACOT9	0.122269	6.30711	0.334683	0.575081	FALSE	0.00945753	6.35852	0.909279	0.969806	FALSE	0.0736525	6.33017	0.502093	0.79797	FALSE	0.0222675	6.02843	0.841702	0.936367	FALSE	0.0599222	6.50645	0.551435	0.758225	FALSE	0.0808928	6.28802	0.463677	0.751956	FALSE	0.0352997	6.29993	0.707196	0.86154	FALSE	0.225016	6.55165	0.0205709	0.177258	FALSE	0.0943199	6.56976	0.419627	0.720644	FALSE	-0.133479	7.94975	0.376185	0.666673
ACOX1	-0.188388	6.54743	0.0934923	0.294426	FALSE	-0.150189	7.05996	0.137597	0.46963	FALSE	-0.158022	6.91456	0.241093	0.613177	FALSE	-0.0628586	6.37317	0.536451	0.766479	FALSE	-0.318222	6.53309	0.00202935	0.0463811	TRUE	-0.181739	6.62223	0.177943	0.51562	FALSE	-0.106847	6.59297	0.333924	0.60114	FALSE	-0.0926586	6.62549	0.403559	0.690739	FALSE	-0.0730033	6.29591	0.542045	0.798435	FALSE	NA	NA	NA	NA
ACOX3	-0.100024	3.32614	0.482255	0.699187	FALSE	-0.105932	3.81358	0.267711	0.607137	FALSE	-0.218066	3.6814	0.103436	0.465092	FALSE	-0.216768	3.12242	0.10234	0.338153	FALSE	-0.0348389	3.94115	0.70129	0.853074	FALSE	0.0318064	3.70239	0.824431	0.93615	FALSE	-0.120321	3.42821	0.359266	0.62369	FALSE	0.0145135	3.56052	0.92082	0.972472	FALSE	NA	NA	NA	NA	NA	NA	NA	NA	NA
ACP1	0.377431	6.25911	0.0105497	0.104565	FALSE	0.20051	5.96828	0.0589594	0.337331	FALSE	0.415531	6.01257	0.00169504	0.108045	FALSE	0.305081	5.73287	0.0614888	0.262125	FALSE	0.354802	6.0221	0.00214208	0.0473246	TRUE	0.355986	6.08774	0.0133071	0.191048	FALSE	0.232669	6.17238	0.0411967	0.220914	FALSE	0.289414	6.14112	0.0193233	0.171079	FALSE	0.241861	6.1396	0.106909	0.408039	FALSE	0.265259	5.86327	0.13219	0.441011
ACP2	0.178025	6.06978	0.410878	0.640983	FALSE	0.194672	5.91808	0.248623	0.589875	FALSE	0.504678	6.13695	0.0199431	0.25673	FALSE	-0.307514	4.75143	0.129238	0.381315	FALSE	0.0676609	5.93939	0.683487	0.842063	FALSE	-0.0309997	5.60524	0.881949	0.960813	FALSE	-0.084897	6.40941	0.607551	0.805541	FALSE	0.186015	6.25365	0.16589	0.462145	FALSE	0.0608131	4.80522	0.727685	0.895919	FALSE	NA	NA	NA	NA
ACP5	0.130133	8.62285	0.542555	0.742704	FALSE	-0.143112	8.13106	0.41077	0.72872	FALSE	-0.132516	7.94559	0.556545	0.827426	FALSE	0.159396	8.04452	0.401642	0.671519	FALSE	0.0995155	8.20449	0.554216	0.760506	FALSE	0.0124314	8.01798	0.961961	0.988799	FALSE	-0.107766	8.46504	0.514684	0.743079	FALSE	-0.0372242	8.35108	0.795118	0.923394	FALSE	0.0717438	7.72764	0.765802	0.910393	FALSE	NA	NA	NA	NA
ACP6	NA	NA	NA	NA	NA	0.122081	1.82165	0.477624	0.770744	FALSE	NA	NA	NA	NA	NA	NA	NA	NA	NA	NA	NA	NA	NA	NA	NA	NA	NA	NA	NA	NA	NA	NA	NA	NA	NA	NA	NA	NA	NA	NA	NA	NA	NA	NA	NA	NA	NA	NA	NA
ACSF2	-0.487664	3.11896	0.0068522	0.0860114	TRUE	-0.383468	3.88652	0.0221368	0.230244	FALSE	-0.408204	3.06693	0.0616185	0.379513	FALSE	-0.136481	3.52574	0.433117	0.69516	FALSE	NA	NA	NA	NA	NA	-0.401746	3.37836	0.0160542	0.208718	FALSE	-0.327879	3.07492	0.049828	0.24096	FALSE	NA	NA	NA	NA	NA	NA	NA	NA	NA	NA	NA	NA	NA	NA
ACSF3	-0.260315	2.88038	0.0253635	0.158056	FALSE	-0.0794641	3.61962	0.520736	0.795066	FALSE	-0.0700452	3.26123	0.633568	0.861864	FALSE	-0.295152	2.61225	0.0908089	0.320003	FALSE	-0.105316	3.50102	0.442616	0.677837	FALSE	-0.253164	3.13835	0.0729407	0.367144	FALSE	-0.300362	2.97065	0.018105	0.155525	FALSE	NA	NA	NA	NA	NA	NA	NA	NA	NA	NA	NA	NA	NA	NA
ACSL1	0.0439116	8.24434	0.827765	0.916942	FALSE	-0.0252138	8.86693	0.894018	0.963181	FALSE	0.20147	8.80333	0.37909	0.727778	FALSE	-0.142844	7.91065	0.488611	0.734741	FALSE	-0.318695	8.46905	0.0441938	0.21268	FALSE	-0.28038	8.3554	0.152279	0.488635	FALSE	-0.417593	8.16831	0.0450915	0.229904	FALSE	-0.085149	8.62127	0.575452	0.810565	FALSE	0.136829	7.91186	0.557905	0.807586	FALSE	-0.519612	6.40764	0.0809023	0.355461
ACSL3	0.0769823	5.9746	0.61549	0.791867	FALSE	0.0642999	6.46532	0.586994	0.833694	FALSE	0.0669731	6.25311	0.738146	0.910303	FALSE	0.386684	7.07961	0.010823	0.116353	FALSE	0.245144	6.49619	0.10031	0.322264	FALSE	0.417298	6.30898	0.00294106	0.112422	FALSE	0.230637	5.91636	0.113021	0.352008	FALSE	0.234632	6.18708	0.0888492	0.353193	FALSE	0.232372	6.89156	0.145619	0.472472	FALSE	0.296584	5.84098	0.20968	0.532664
ACSL4	0.224065	6.11913	0.197594	0.437388	FALSE	0.210176	6.79997	0.158941	0.497883	FALSE	0.0505879	6.83765	0.810884	0.943036	FALSE	0.204383	6.54591	0.189403	0.463849	FALSE	0.271338	7.41219	0.0422831	0.207894	FALSE	0.212858	6.35873	0.154855	0.491507	FALSE	0.36849	6.32303	0.00975647	0.122382	FALSE	0.259683	6.4193	0.0855484	0.348059	FALSE	0.233425	6.31561	0.165447	0.49677	FALSE	-0.36852	7.64303	0.0461124	0.28866
ACSL5	-0.00269074	6.43542	0.979285	0.990764	FALSE	0.0569046	6.95189	0.532959	0.801962	FALSE	0.0145382	7.09369	0.902314	0.971814	FALSE	-0.000623849	6.90451	0.995481	0.997392	FALSE	0.137044	7.27142	0.173291	0.422986	FALSE	0.00753275	6.79727	0.950677	0.985453	FALSE	0.182228	6.50241	0.0476588	0.235967	FALSE	0.104552	6.66855	0.315347	0.621853	FALSE	0.039804	6.84113	0.769011	0.911514	FALSE	NA	NA	NA	NA
ACSM3	-0.214996	1.05514	0.451376	0.674771	FALSE	-0.155224	2.13086	0.690445	0.883577	FALSE	NA	NA	NA	NA	NA	NA	NA	NA	NA	NA	NA	NA	NA	NA	NA	NA	NA	NA	NA	NA	NA	NA	NA	NA	NA	NA	NA	NA	NA	NA	NA	NA	NA	NA	NA	NA	NA	NA	NA
ACSS1	NA	NA	NA	NA	NA	0.128774	1.65679	0.616221	0.851121	FALSE	NA	NA	NA	NA	NA	NA	NA	NA	NA	NA	NA	NA	NA	NA	NA	NA	NA	NA	NA	NA	NA	NA	NA	NA	NA	NA	NA	NA	NA	NA	NA	NA	NA	NA	NA	NA	NA	NA	NA
ACSS2	0.297929	3.50947	0.0184609	0.137913	FALSE	0.164294	4.32343	0.178382	0.518453	FALSE	0.0770685	3.58488	0.546356	0.824144	FALSE	0.204312	3.74883	0.122983	0.371835	FALSE	-0.0737385	3.68233	0.53731	0.747758	FALSE	0.214508	3.70876	0.133905	0.465769	FALSE	0.04889	3.32258	0.738519	0.879439	FALSE	-0.0881068	3.62776	0.54343	0.787467	FALSE	NA	NA	NA	NA	NA	NA	NA	NA	NA
ACTB	0.434934	10.2286	0.061598	0.240713	FALSE	0.0773995	9.76974	0.648885	0.865954	FALSE	0.173866	9.93057	0.434583	0.761051	FALSE	0.425313	10.0487	0.0242595	0.170511	FALSE	0.232991	10.335	0.139916	0.381231	FALSE	0.286898	9.60966	0.11257	0.438454	FALSE	0.0727561	10.4429	0.708347	0.862219	FALSE	0.172971	10.17	0.239615	0.547753	FALSE	0.202912	9.4648	0.2885	0.615097	FALSE	0.101176	11.842	0.513876	0.758615
ACTG1	0.183172	8.88755	0.446201	0.66961	FALSE	-0.0378939	8.35465	0.854008	0.950688	FALSE	0.124079	8.61503	0.659547	0.874694	FALSE	0.00520912	8.79236	0.976097	0.989492	FALSE	0.132092	9.07347	0.441562	0.676683	FALSE	0.318262	8.25301	0.127991	0.458961	FALSE	-0.162498	9.12586	0.440932	0.690213	FALSE	0.0424483	8.81333	0.81159	0.930934	FALSE	0.0194076	8.32243	0.913123	0.968947	FALSE	-0.157005	9.97886	0.259832	0.58954
ACTL6A	0.0795452	4.38478	0.563867	0.758641	FALSE	0.0999465	4.43363	0.347885	0.68004	FALSE	0.329769	4.34104	0.0485547	0.346077	FALSE	-0.244654	3.58557	0.127279	0.377961	FALSE	0.0590412	4.43089	0.605742	0.796454	FALSE	0.116091	4.36862	0.401608	0.709485	FALSE	0.03467	4.30182	0.794732	0.912106	FALSE	0.120895	4.41889	0.324341	0.630179	FALSE	NA	NA	NA	NA	NA	NA	NA	NA	NA
ACTN1	0.226854	7.71901	0.0509703	0.219706	FALSE	0.198869	8.18985	0.0507799	0.317105	FALSE	0.156988	8.02537	0.214368	0.585501	FALSE	-0.0036864	7.54418	0.976634	0.989549	FALSE	0.0780945	7.648	0.454638	0.686403	FALSE	0.204063	7.85349	0.0784669	0.378563	FALSE	0.198892	7.74061	0.0547765	0.251499	FALSE	0.313505	7.88561	0.00328969	0.0730448	TRUE	0.170694	7.61537	0.188382	0.517023	FALSE	NA	NA	NA	NA
ACTN4	0.189128	6.39845	0.145038	0.372727	FALSE	0.0693998	6.87714	0.500109	0.784873	FALSE	0.0615158	6.5836	0.625687	0.858545	FALSE	-0.142434	6.51225	0.302417	0.584024	FALSE	-0.0171551	6.67893	0.856346	0.935257	FALSE	0.0580719	6.7866	0.607143	0.832575	FALSE	0.0144241	6.38114	0.898285	0.958704	FALSE	0.0871397	6.5608	0.382877	0.676571	FALSE	0.00234153	6.89688	0.984897	0.996726	FALSE	-0.384397	7.3022	0.0287997	0.236699
ACTR10	0.0190945	5.97978	0.886504	0.945226	FALSE	-0.00321694	5.92917	0.971249	0.992506	FALSE	0.0909112	5.92754	0.398172	0.73822	FALSE	-0.150503	5.57226	0.174194	0.443713	FALSE	-0.0791767	6.02509	0.337481	0.598916	FALSE	0.0705015	5.95742	0.508427	0.780208	FALSE	-0.00960285	5.92274	0.923979	0.968639	FALSE	-0.00893454	6.04021	0.925761	0.975515	FALSE	0.0171072	6.05512	0.879927	0.957992	FALSE	-0.0519551	6.08511	0.763069	0.894429
ACTR1A	0.0800345	5.41162	0.570543	0.762261	FALSE	-0.132197	5.25069	0.154358	0.491674	FALSE	-0.0630689	5.2704	0.546854	0.824144	FALSE	-0.122897	4.94737	0.296059	0.577055	FALSE	-0.0928786	5.33329	0.274179	0.539279	FALSE	0.0860247	5.29387	0.396771	0.705746	FALSE	0.0186666	5.40513	0.872724	0.949778	FALSE	-0.0218511	5.35761	0.839957	0.94361	FALSE	-0.00902471	5.27416	0.945411	0.981665	FALSE	-0.202559	5.32988	0.410559	0.68858
ACTR1B	0.122499	2.77122	0.351133	0.590712	FALSE	-0.0472654	2.94083	0.705639	0.888321	FALSE	-0.00128474	3.03884	0.99315	0.997181	FALSE	0.280861	2.51558	0.0861278	0.311784	FALSE	0.0875922	3.22185	0.478416	0.703158	FALSE	0.0117935	2.87302	0.945588	0.984698	FALSE	0.0391095	2.92262	0.811602	0.920322	FALSE	NA	NA	NA	NA	NA	NA	NA	NA	NA	NA	NA	NA	NA	NA
ACTR2	-0.0415593	8.40126	0.672181	0.827332	FALSE	-0.0493515	8.81056	0.528308	0.800016	FALSE	-0.00548407	8.71179	0.949318	0.986607	FALSE	-0.0136409	8.12423	0.881097	0.952106	FALSE	-0.0495595	8.80252	0.526859	0.740506	FALSE	-0.165787	8.52685	0.128163	0.459105	FALSE	-0.125786	8.38945	0.156694	0.41742	FALSE	0.00421467	8.65326	0.949167	0.983747	FALSE	-0.0389206	8.43956	0.672694	0.871006	FALSE	-0.0843	8.62262	0.400096	0.68239
ACTR3	-0.000699455	8.71033	0.994996	0.997758	FALSE	0.0122129	8.94044	0.861732	0.952872	FALSE	0.0448814	8.96084	0.61429	0.853656	FALSE	0.042738	8.62054	0.625097	0.819819	FALSE	0.0512055	9.20948	0.452804	0.684746	FALSE	0.0598081	8.77948	0.561133	0.8087	FALSE	-0.109447	8.67912	0.215596	0.486611	FALSE	0.0599132	8.90879	0.405727	0.692293	FALSE	0.0483467	8.87156	0.643679	0.856822	FALSE	-0.130326	9.32302	0.255392	0.584206
ACTR3B	NA	NA	NA	NA	NA	0.0792095	2.53767	0.623624	0.853799	FALSE	-0.00564513	1.91032	0.981686	0.994231	FALSE	NA	NA	NA	NA	NA	NA	NA	NA	NA	NA	NA	NA	NA	NA	NA	NA	NA	NA	NA	NA	NA	NA	NA	NA	NA	NA	NA	NA	NA	NA	NA	NA	NA	NA
ACTR3C	NA	NA	NA	NA	NA	-0.230481	2.56907	0.227382	0.566769	FALSE	-0.541229	2.14822	0.0260472	0.285954	FALSE	NA	NA	NA	NA	NA	NA	NA	NA	NA	NA	NA	NA	NA	NA	NA	NA	NA	NA	NA	NA	NA	NA	NA	NA	NA	NA	NA	NA	NA	NA	NA	NA	NA	NA
ACTR5	NA	NA	NA	NA	NA	0.178672	2.11684	0.159803	0.498412	FALSE	NA	NA	NA	NA	NA	NA	NA	NA	NA	NA	NA	NA	NA	NA	NA	NA	NA	NA	NA	NA	NA	NA	NA	NA	NA	NA	NA	NA	NA	NA	NA	NA	NA	NA	NA	NA	NA	NA	NA
ACTR6	0.0659846	4.92944	0.595219	0.778854	FALSE	0.0288272	4.85903	0.808927	0.932146	FALSE	0.206068	4.88591	0.220718	0.593102	FALSE	0.00725389	4.549	0.958343	0.984147	FALSE	-0.0374833	4.96675	0.721249	0.866495	FALSE	-0.00882791	4.90317	0.940659	0.983241	FALSE	-0.0817959	4.85035	0.422368	0.672626	FALSE	-0.020904	4.98121	0.839825	0.943599	FALSE	-0.0726973	4.86229	0.675037	0.872845	FALSE	NA	NA	NA	NA
ACTR8	-0.0630992	3.69221	0.648269	0.813122	FALSE	-0.0304494	3.80171	0.775881	0.918137	FALSE	0.0237002	3.74168	0.885379	0.966307	FALSE	0.108315	3.28586	0.518261	0.754729	FALSE	-0.0616498	3.6752	0.515857	0.731983	FALSE	0.0120361	3.66848	0.938856	0.98306	FALSE	-0.0251814	3.72071	0.834924	0.931601	FALSE	-0.0734018	3.72762	0.523702	0.777147	FALSE	NA	NA	NA	NA	NA	NA	NA	NA	NA
ACVR1	-0.275189	4.82819	0.0962924	0.298424	FALSE	-0.166371	5.93982	0.210718	0.551668	FALSE	-0.149604	5.50004	0.335416	0.697055	FALSE	-0.361869	5.30589	0.0515886	0.240222	FALSE	-0.068113	5.91437	0.57009	0.773136	FALSE	-0.224807	5.57554	0.140376	0.473132	FALSE	-0.220183	4.88013	0.088016	0.31481	FALSE	-0.192283	5.16642	0.134947	0.421918	FALSE	-0.0737756	5.90611	0.70938	0.889445	FALSE	NA	NA	NA	NA
ACVR1B	-0.369219	3.72599	0.0108301	0.105626	FALSE	-0.219416	4.52346	0.0704328	0.36019	FALSE	-0.123785	4.46092	0.368479	0.722225	FALSE	-0.243583	3.77508	0.167333	0.435308	FALSE	-0.29988	4.30358	0.0135049	0.12133	FALSE	-0.32239	4.15853	0.0222355	0.24147	FALSE	-0.35829	3.79371	0.00835881	0.112644	FALSE	-0.32092	4.22598	0.0206743	0.177741	FALSE	NA	NA	NA	NA	NA	NA	NA	NA	NA
ACVR2A	-0.0475335	3.59826	0.837091	0.92219	FALSE	-0.00337457	5.03993	0.984115	0.99538	FALSE	-0.0842686	5.09935	0.736618	0.909944	FALSE	-0.27666	4.46553	0.148474	0.409885	FALSE	0.0370388	5.42833	0.812604	0.916632	FALSE	-0.134674	4.61293	0.498958	0.775706	FALSE	-0.385062	3.68138	0.0832381	0.306743	FALSE	-0.153712	4.34275	0.432012	0.711945	FALSE	0.0702042	4.46674	0.760358	0.907844	FALSE	-0.239781	5.7133	0.412317	0.68873
ACVR2B	NA	NA	NA	NA	NA	-0.220016	2.31364	0.103054	0.419807	FALSE	NA	NA	NA	NA	NA	NA	NA	NA	NA	NA	NA	NA	NA	NA	NA	NA	NA	NA	NA	NA	NA	NA	NA	NA	NA	NA	NA	NA	NA	NA	NA	NA	NA	NA	NA	NA	NA	NA	NA
ACVRL1	-0.456651	4.1604	0.0322877	0.175853	FALSE	-0.525343	3.91645	0.0111767	0.169447	FALSE	-0.457837	3.9849	0.0469977	0.343051	FALSE	-0.0708213	3.53271	0.767877	0.902829	FALSE	-0.725986	2.95462	0.0003488	0.0186453	TRUE	-0.49067	3.68421	0.0401657	0.298849	FALSE	-0.454138	4.30256	0.0160441	0.148961	FALSE	-0.345904	4.15631	0.0585239	0.293682	FALSE	NA	NA	NA	NA	NA	NA	NA	NA	NA
ACYP1	0.294011	4.23051	0.0391977	0.194949	FALSE	0.0328009	4.23338	0.769936	0.917141	FALSE	0.214078	4.14737	0.091998	0.448883	FALSE	0.274344	4.17215	0.0383052	0.206476	FALSE	0.154818	4.14755	0.187197	0.442931	FALSE	0.250231	4.45594	0.0552083	0.334551	FALSE	0.221549	4.14133	0.0525537	0.247283	FALSE	0.0693595	4.04647	0.63579	0.841845	FALSE	0.0217492	4.85852	0.905579	0.967632	FALSE	NA	NA	NA	NA
ACYP2	0.030594	7.04398	0.855031	0.929845	FALSE	0.115383	8.16858	0.487408	0.778184	FALSE	0.0487136	7.36995	0.806077	0.941489	FALSE	-0.0666334	7.42293	0.572912	0.78926	FALSE	-0.130719	6.09362	0.4329	0.670698	FALSE	0.0427757	7.51929	0.794198	0.924951	FALSE	0.186501	7.00718	0.272973	0.548272	FALSE	0.265235	7.23149	0.0842165	0.345346	FALSE	-0.0101627	7.62351	0.941526	0.980545	FALSE	-0.516601	5.68161	0.0349313	0.25873
ADA	0.311431	3.92183	0.502023	0.711971	FALSE	0.192013	3.66204	0.694919	0.88444	FALSE	0.278723	4.91608	0.601481	0.847067	FALSE	-0.1167	3.28908	0.726409	0.880556	FALSE	-0.0678344	5.24635	0.857626	0.935398	FALSE	-0.174327	3.79914	0.639927	0.849717	FALSE	-0.127378	4.16928	0.778791	0.902963	FALSE	0.31816	4.31273	0.43045	0.711782	FALSE	NA	NA	NA	NA	NA	-0.0812572	6.85014	0.82391	0.923024
ADA2	0.291797	5.65258	0.210946	0.453597	FALSE	0.0107431	6.00096	0.964252	0.990012	FALSE	0.0584708	5.81279	0.822422	0.945771	FALSE	0.309244	5.50857	0.170614	0.43923	FALSE	0.0905653	5.80595	0.703163	0.854487	FALSE	0.0131903	5.59784	0.949383	0.985453	FALSE	0.0787875	5.62504	0.696502	0.855565	FALSE	0.140864	5.93009	0.46264	0.732642	FALSE	0.356321	5.12171	0.265816	0.600397	FALSE	NA	NA	NA	NA
ADAL	0.487778	2.23728	0.00254058	0.0556019	TRUE	0.447804	2.56773	0.00337912	0.106196	FALSE	0.613747	2.39913	0.0038482	0.153746	FALSE	0.298524	2.11492	0.188454	0.462811	FALSE	0.600298	2.38956	0.0037089	0.0601805	TRUE	NA	NA	NA	NA	NA	NA	NA	NA	NA	NA	NA	NA	NA	NA	NA	NA	NA	NA	NA	NA	NA	NA	NA	NA
ADAM10	-0.0115491	6.42111	0.932327	0.967519	FALSE	0.0793849	7.42297	0.468435	0.763441	FALSE	-0.0334732	7.02983	0.82193	0.945527	FALSE	-0.0509732	6.88832	0.698404	0.865431	FALSE	-0.0865655	7.23385	0.460645	0.691067	FALSE	-0.029384	6.82101	0.790399	0.923716	FALSE	-0.0777519	6.47726	0.536457	0.75829	FALSE	-0.0128072	6.68376	0.920019	0.972289	FALSE	0.213295	6.9803	0.116625	0.423158	FALSE	-0.229496	5.92058	0.217714	0.540878
ADAM15	0.0519582	2.99179	0.720185	0.855746	FALSE	-0.0264742	3.04582	0.819914	0.9356	FALSE	0.098712	3.00362	0.50443	0.799142	FALSE	-0.103017	2.91496	0.597246	0.802228	FALSE	-0.317633	3.30884	0.0223101	0.150945	FALSE	0.0953936	2.98339	0.577276	0.816492	FALSE	-0.016048	3.15797	0.917975	0.965986	FALSE	NA	NA	NA	NA	NA	NA	NA	NA	NA	NA	NA	NA	NA	NA
ADAM17	-0.0264218	7.22881	0.847157	0.926799	FALSE	-0.145917	8.19888	0.257077	0.597871	FALSE	-0.227326	7.88452	0.148019	0.519764	FALSE	-0.00502763	7.99127	0.96997	0.987988	FALSE	-0.164877	7.80268	0.176009	0.427343	FALSE	-0.247258	7.83361	0.0471679	0.32239	FALSE	-0.287252	7.05748	0.0393468	0.216382	FALSE	-0.141783	7.70303	0.251695	0.558953	FALSE	-0.0819051	7.93189	0.51515	0.780081	FALSE	-0.241284	6.83855	0.211581	0.536323
ADAM19	NA	NA	NA	NA	NA	NA	NA	NA	NA	NA	NA	NA	NA	NA	NA	NA	NA	NA	NA	NA	NA	NA	NA	NA	NA	NA	NA	NA	NA	NA	NA	NA	NA	NA	NA	NA	NA	NA	NA	NA	NA	NA	NA	NA	NA	0.308878	9.05162	0.237403	0.565191
ADAM28	NA	NA	NA	NA	NA	NA	NA	NA	NA	NA	NA	NA	NA	NA	NA	NA	NA	NA	NA	NA	0.0162632	3.62533	0.953304	0.980055	FALSE	NA	NA	NA	NA	NA	NA	NA	NA	NA	NA	NA	NA	NA	NA	NA	NA	NA	NA	NA	NA	NA	NA	NA	NA
ADAM8	NA	NA	NA	NA	NA	NA	NA	NA	NA	NA	NA	NA	NA	NA	NA	NA	NA	NA	NA	NA	0.0589944	2.62584	0.849525	0.932428	FALSE	NA	NA	NA	NA	NA	NA	NA	NA	NA	NA	NA	NA	NA	NA	NA	NA	NA	NA	NA	NA	NA	NA	NA	NA
ADAM9	-0.192217	5.72819	0.0960214	0.297986	FALSE	-0.108231	6.44128	0.246648	0.5883	FALSE	-0.0901419	6.22379	0.450697	0.770324	FALSE	-0.150516	5.93614	0.205655	0.483036	FALSE	-0.0170059	6.83553	0.87292	0.942679	FALSE	-0.0967568	6.20389	0.446681	0.740403	FALSE	-0.235875	5.72619	0.0304696	0.195595	FALSE	-0.0835136	6.02146	0.437215	0.717381	FALSE	0.0060591	6.26023	0.965517	0.988607	FALSE	0.0602871	6.79291	0.721275	0.874189
ADAMDEC1	NA	NA	NA	NA	NA	NA	NA	NA	NA	NA	NA	NA	NA	NA	NA	NA	NA	NA	NA	NA	0.289145	4.71342	0.382106	0.63118	FALSE	NA	NA	NA	NA	NA	NA	NA	NA	NA	NA	NA	NA	NA	NA	NA	NA	NA	NA	NA	NA	NA	NA	NA	NA
ADAMTSL1	NA	NA	NA	NA	NA	NA	NA	NA	NA	NA	NA	NA	NA	NA	NA	0.42784	3.61371	0.424237	0.688369	FALSE	NA	NA	NA	NA	NA	NA	NA	NA	NA	NA	NA	NA	NA	NA	NA	NA	NA	NA	NA	NA	NA	NA	NA	NA	NA	NA	NA	NA	NA
ADAMTSL4	0.263124	4.81714	0.177547	0.412746	FALSE	0.144476	5.12546	0.31175	0.650078	FALSE	-0.0925268	4.7166	0.644515	0.865954	FALSE	0.329033	4.61316	0.160159	0.425014	FALSE	-0.0933267	4.19372	0.4993	0.718896	FALSE	0.0919502	4.68983	0.63613	0.848281	FALSE	0.0831177	4.7272	0.625582	0.818252	FALSE	0.18653	4.94711	0.196178	0.499022	FALSE	NA	NA	NA	NA	NA	NA	NA	NA	NA
ADAMTSL4-AS1	-0.387415	4.08098	0.0365549	0.188038	FALSE	-0.246938	5.31355	0.0884264	0.392397	FALSE	-0.262472	5.20521	0.137779	0.508298	FALSE	-0.0579084	5.28253	0.723108	0.878591	FALSE	-0.0413252	5.48113	0.795409	0.908485	FALSE	-0.451637	4.58198	0.0151549	0.20341	FALSE	-0.301468	4.18404	0.128142	0.376006	FALSE	-0.281672	5.01405	0.0497399	0.274312	FALSE	-0.228531	4.66531	0.246217	0.583731	FALSE	NA	NA	NA	NA
ADAP1	0.160794	3.54807	0.370719	0.605058	FALSE	0.0681649	3.32842	0.705054	0.888167	FALSE	0.185752	3.53861	0.345262	0.703034	FALSE	-0.0694525	3.06134	0.745907	0.89174	FALSE	0.320425	3.41666	0.0970561	0.31732	FALSE	-0.154051	3.13701	0.495519	0.773529	FALSE	-0.0140659	3.479	0.934541	0.974906	FALSE	-0.13771	3.58649	0.380295	0.674318	FALSE	NA	NA	NA	NA	NA	NA	NA	NA	NA
ADAP2	0.0242671	5.52679	0.864373	0.934743	FALSE	0.0600521	5.97575	0.56699	0.821027	FALSE	0.164983	5.94102	0.212853	0.583248	FALSE	-0.127476	5.0456	0.351637	0.632279	FALSE	-0.117231	6.12739	0.381951	0.631155	FALSE	-0.116304	5.79522	0.451948	0.745076	FALSE	0.0495374	5.6504	0.695717	0.855203	FALSE	0.18155	5.92712	0.116423	0.394692	FALSE	0.162524	5.68315	0.295344	0.61964	FALSE	NA	NA	NA	NA
ADAR	-0.0727357	6.21708	0.69874	0.844462	FALSE	-0.0296014	6.73323	0.853614	0.950615	FALSE	0.0799169	6.70423	0.687579	0.889984	FALSE	-0.227237	5.82458	0.154305	0.417273	FALSE	0.00388572	6.77798	0.981258	0.991125	FALSE	-0.095238	6.43499	0.510681	0.781091	FALSE	-0.106213	6.21999	0.477593	0.719392	FALSE	0.0980195	7.21483	0.370033	0.669157	FALSE	-0.070356	6.07188	0.722344	0.89358	FALSE	-0.393161	6.731	0.0402857	0.277004
ADARB1	NA	NA	NA	NA	NA	NA	NA	NA	NA	NA	NA	NA	NA	NA	NA	NA	NA	NA	NA	NA	0.0770242	2.25236	0.78102	0.902404	FALSE	NA	NA	NA	NA	NA	NA	NA	NA	NA	NA	NA	NA	NA	NA	NA	NA	NA	NA	NA	NA	NA	NA	NA	NA
ADAT1	-0.0899149	3.19308	0.566244	0.760057	FALSE	0.0982873	3.84089	0.377702	0.703031	FALSE	0.0683931	3.65466	0.687266	0.889937	FALSE	-0.16891	2.81004	0.328336	0.608675	FALSE	-0.173517	3.485	0.226182	0.491407	FALSE	-0.144751	3.46984	0.4159	0.720149	FALSE	-0.32105	3.27678	0.045638	0.230811	FALSE	0.166561	3.58453	0.15269	0.445519	FALSE	NA	NA	NA	NA	NA	NA	NA	NA	NA
ADCK1	-0.359432	1.94885	0.0314182	0.173512	FALSE	0.0291216	3.27687	0.783161	0.920685	FALSE	-0.187883	2.73532	0.330084	0.693101	FALSE	NA	NA	NA	NA	NA	-0.225203	2.52661	0.314083	0.577841	FALSE	-0.0865031	2.59302	0.664597	0.863844	FALSE	NA	NA	NA	NA	NA	NA	NA	NA	NA	NA	NA	NA	NA	NA	NA	NA	NA	NA	NA
ADCK2	0.211283	3.75694	0.154741	0.38539	FALSE	0.229875	3.67606	0.0470402	0.308735	FALSE	0.306148	3.69747	0.0576437	0.371262	FALSE	0.325717	3.27729	0.0229518	0.16454	FALSE	-0.031052	3.51934	0.83942	0.928509	FALSE	0.274507	3.64803	0.0685274	0.361513	FALSE	0.102455	3.97133	0.473938	0.716785	FALSE	0.21304	3.73587	0.134476	0.421918	FALSE	NA	NA	NA	NA	NA	NA	NA	NA	NA
ADCY3	-0.491076	5.03645	0.0419571	0.201184	FALSE	-0.418596	5.7269	0.0759184	0.372221	FALSE	-0.487983	5.30411	0.0878914	0.442028	FALSE	0.0374437	5.95784	0.858651	0.942579	FALSE	-0.399318	4.70364	0.0609243	0.25127	FALSE	-0.174676	5.51118	0.359249	0.680311	FALSE	-0.304073	4.90741	0.213188	0.48403	FALSE	-0.34547	5.15522	0.0932767	0.359808	FALSE	-0.263813	5.70356	0.270129	0.604235	FALSE	NA	NA	NA	NA
ADCY7	0.0966537	4.53632	0.555316	0.752338	FALSE	0.0219833	5.2783	0.874453	0.956848	FALSE	0.154656	4.92945	0.42654	0.755526	FALSE	-0.213422	4.58258	0.245722	0.528673	FALSE	-0.120274	4.97067	0.433216	0.670796	FALSE	-0.131609	4.75396	0.377648	0.692548	FALSE	-0.0601361	4.61748	0.680656	0.847124	FALSE	0.0305342	5.0416	0.820242	0.934934	FALSE	0.0891321	4.8597	0.630106	0.84959	FALSE	NA	NA	NA	NA
ADCY9	-0.263419	2.52157	0.116623	0.33084	FALSE	0.00403307	3.95276	0.972457	0.992821	FALSE	-0.052236	3.38005	0.751991	0.914542	FALSE	-0.594892	2.93039	0.0149462	0.132255	FALSE	-0.332572	3.55796	0.0561246	0.241517	FALSE	-0.277971	3.56546	0.13182	0.462985	FALSE	NA	NA	NA	NA	NA	NA	NA	NA	NA	NA	NA	NA	NA	NA	NA	NA	NA	NA	NA
ADD1	-0.158415	5.47739	0.103084	0.309824	FALSE	-0.0893857	6.23135	0.161774	0.499955	FALSE	-0.0591595	5.9895	0.498748	0.795987	FALSE	-0.170467	5.66622	0.14312	0.401556	FALSE	-0.201796	6.05778	0.0254718	0.162412	FALSE	-0.1239	5.97569	0.15403	0.491079	FALSE	-0.202623	5.43011	0.0161129	0.148961	FALSE	-0.161057	5.87619	0.0555955	0.28663	FALSE	-0.106486	5.96318	0.433636	0.728736	FALSE	-0.360055	5.9467	0.0596894	0.317996
ADD3	-0.0684933	3.35517	0.682871	0.834771	FALSE	0.0589892	4.32864	0.742271	0.905586	FALSE	-0.292759	3.8024	0.165406	0.537953	FALSE	-0.138285	3.68452	0.393366	0.664682	FALSE	-0.276163	3.75413	0.113251	0.341385	FALSE	-0.18238	3.79438	0.419955	0.722555	FALSE	0.094524	3.45963	0.598023	0.799126	FALSE	0.128858	3.66702	0.478185	0.744453	FALSE	NA	NA	NA	NA	NA	NA	NA	NA	NA
ADGRE1	-0.326602	4.53326	0.598289	0.780618	FALSE	-0.705342	4.73773	0.250631	0.591583	FALSE	-0.762248	4.56099	0.26329	0.636632	FALSE	-0.308507	4.13487	0.593296	0.801297	FALSE	NA	NA	NA	NA	NA	-0.462329	4.33073	0.367698	0.686879	FALSE	-0.570574	4.30415	0.321397	0.591039	FALSE	0.223705	4.918	0.656995	0.852378	FALSE	NA	NA	NA	NA	NA	NA	NA	NA	NA
ADGRE2	-0.401398	2.68603	0.140728	0.367034	FALSE	-0.571113	3.62898	0.0416038	0.293289	FALSE	-0.736125	3.4185	0.0131962	0.227062	FALSE	-0.316799	3.34902	0.237942	0.519472	FALSE	-0.22308	4.9419	0.185044	0.439713	FALSE	-0.879507	2.97711	0.00157356	0.0907914	TRUE	-0.806037	2.81897	0.00743535	0.107977	FALSE	NA	NA	NA	NA	NA	NA	NA	NA	NA	NA	NA	NA	NA	NA
ADGRE3	-0.00312962	2.86967	0.991364	0.995414	FALSE	0.226648	3.64658	0.473827	0.767559	FALSE	-0.117654	2.73979	0.761398	0.920246	FALSE	0.350141	3.56433	0.250864	0.534221	FALSE	NA	NA	NA	NA	NA	0.295859	3.0711	0.315607	0.650063	FALSE	NA	NA	NA	NA	NA	NA	NA	NA	NA	NA	NA	NA	NA	NA	NA	NA	NA	NA	NA
ADGRE5	-0.175962	5.77992	0.323194	0.565705	FALSE	-0.296997	6.19589	0.0713822	0.362247	FALSE	-0.432997	6.11516	0.0269658	0.287334	FALSE	-0.13288	6.18785	0.358095	0.635487	FALSE	-0.122098	6.32903	0.381102	0.630579	FALSE	-0.252892	6.0488	0.128516	0.459573	FALSE	-0.0792377	5.78282	0.603175	0.80279	FALSE	-0.118346	6.20512	0.411224	0.69463	FALSE	-0.339436	6.18491	0.0280958	0.244559	FALSE	NA	NA	NA	NA
ADGRF3	NA	NA	NA	NA	NA	NA	NA	NA	NA	NA	NA	NA	NA	NA	NA	-0.248898	3.40175	0.500663	0.743143	FALSE	NA	NA	NA	NA	NA	NA	NA	NA	NA	NA	NA	NA	NA	NA	NA	NA	NA	NA	NA	NA	NA	NA	NA	NA	NA	NA	NA	NA	NA
ADGRG2	NA	NA	NA	NA	NA	0.42106	2.51106	0.124276	0.452773	FALSE	0.286957	2.24416	0.449139	0.769382	FALSE	NA	NA	NA	NA	NA	NA	NA	NA	NA	NA	NA	NA	NA	NA	NA	NA	NA	NA	NA	NA	NA	NA	NA	NA	NA	NA	NA	NA	NA	NA	NA	NA	NA	NA
ADH5	-0.0832791	6.19411	0.610128	0.788156	FALSE	-0.0463019	5.91763	0.731358	0.900736	FALSE	0.0505337	5.95898	0.768146	0.92356	FALSE	-0.209908	5.22095	0.165104	0.431724	FALSE	-0.220569	5.59892	0.110179	0.336325	FALSE	0.0628215	5.77969	0.667545	0.865238	FALSE	-0.149676	6.21476	0.260824	0.535162	FALSE	0.0239613	6.03367	0.839456	0.943459	FALSE	-0.19922	5.55892	0.261496	0.596702	FALSE	NA	NA	NA	NA
ADI1	0.136794	6.15667	0.342739	0.582865	FALSE	0.101849	5.82982	0.410401	0.728627	FALSE	0.201905	6.17439	0.200269	0.570379	FALSE	0.0127868	5.6727	0.924662	0.971454	FALSE	-0.0183495	6.012	0.881366	0.94674	FALSE	0.202464	6.01779	0.144563	0.477489	FALSE	0.117523	6.20756	0.40529	0.660607	FALSE	-0.00999539	6.05402	0.937311	0.978537	FALSE	-0.211689	5.69471	0.242969	0.579889	FALSE	0.715498	6.45662	0.00408182	0.104373
ADIPOR1	0.246315	5.93187	0.0484308	0.215398	FALSE	0.121135	5.76962	0.080781	0.37908	FALSE	0.166115	5.82499	0.121203	0.486436	FALSE	0.10373	5.71673	0.369354	0.644859	FALSE	0.172436	6.22957	0.100107	0.321721	FALSE	0.0466122	5.92049	0.74783	0.906526	FALSE	0.121234	5.94489	0.258706	0.533379	FALSE	0.159048	5.83772	0.0884389	0.352571	FALSE	0.260592	5.8952	0.0505248	0.302264	FALSE	0.223259	5.41233	0.27605	0.602276
ADIPOR2	-0.202001	5.45839	0.222635	0.465697	FALSE	-0.237136	6.24887	0.082008	0.381907	FALSE	-0.299529	5.82285	0.0926286	0.449666	FALSE	-0.190408	6.39465	0.204782	0.481599	FALSE	-0.219025	5.66301	0.0443823	0.212991	FALSE	-0.269619	5.81842	0.0411885	0.30229	FALSE	-0.260841	5.39875	0.0844322	0.308794	FALSE	-0.188711	5.63545	0.155685	0.44915	FALSE	-0.198297	6.08228	0.228593	0.566338	FALSE	-0.0779804	5.45335	0.740806	0.883152
ADK	-0.0267313	5.98175	0.843732	0.925473	FALSE	-0.00716554	7.10721	0.948845	0.985522	FALSE	-0.0567275	6.68857	0.727372	0.906779	FALSE	-0.0259811	7.12074	0.842053	0.936642	FALSE	0.164249	7.46052	0.212922	0.476894	FALSE	0.200076	6.89421	0.161268	0.499513	FALSE	0.096095	5.93188	0.394423	0.65268	FALSE	-0.0266637	6.21816	0.830781	0.939837	FALSE	-0.0306415	7.06081	0.841744	0.940517	FALSE	-0.2599	7.65632	0.180258	0.498133
ADM	0.139192	3.49897	0.710202	0.850516	FALSE	0.0730051	3.11271	0.828904	0.939614	FALSE	-0.0175079	3.69968	0.970633	0.992666	FALSE	0.362382	5.66486	0.154197	0.417273	FALSE	0.24664	4.28503	0.354671	0.611746	FALSE	0.454676	3.80694	0.162581	0.50044	FALSE	0.47376	3.42246	0.298773	0.5719	FALSE	0.271492	3.9494	0.469173	0.736593	FALSE	0.104799	5.14912	0.73368	0.898072	FALSE	NA	NA	NA	NA
ADNP	-0.274284	4.77018	0.0221064	0.149989	FALSE	-0.155197	5.73864	0.0670479	0.35238	FALSE	-0.270851	5.39323	0.0157012	0.235121	FALSE	-0.232624	5.57194	0.118274	0.364332	FALSE	-0.12444	5.66453	0.243217	0.510411	FALSE	-0.185066	5.37951	0.0997096	0.417681	FALSE	-0.390366	4.78208	0.000566096	0.0318438	TRUE	-0.272178	5.05447	0.0221829	0.18378	FALSE	-0.357879	5.61494	0.0377003	0.270357	FALSE	-0.205479	5.83521	0.293341	0.611725
ADNP2	-0.227177	3.88167	0.149771	0.37888	FALSE	-0.428964	4.64614	0.00146854	0.0837678	TRUE	-0.485545	4.3516	0.019326	0.253614	FALSE	0.0959393	5.62555	0.543919	0.770505	FALSE	-0.0209601	4.7323	0.873163	0.942679	FALSE	-0.182587	4.37598	0.205201	0.544877	FALSE	-0.183073	3.87729	0.242428	0.519061	FALSE	-0.290573	4.10429	0.0982422	0.369567	FALSE	0.0427657	5.09638	0.789712	0.921281	FALSE	NA	NA	NA	NA
ADO	0.224345	3.64436	0.142747	0.369874	FALSE	0.347542	4.09168	0.00655359	0.135907	FALSE	0.495035	3.80067	0.00203265	0.113918	FALSE	0.0102796	3.25087	0.949062	0.98065	FALSE	0.272076	4.49918	0.0284219	0.17138	FALSE	0.248472	3.83716	0.0640127	0.352909	FALSE	0.263447	3.66272	0.0728465	0.287308	FALSE	0.18175	3.76752	0.271493	0.577838	FALSE	NA	NA	NA	NA	NA	NA	NA	NA	NA
ADORA2A	NA	NA	NA	NA	NA	NA	NA	NA	NA	NA	0.132724	2.25238	0.762843	0.920582	FALSE	NA	NA	NA	NA	NA	0.329212	3.40477	0.257349	0.52329	FALSE	NA	NA	NA	NA	NA	NA	NA	NA	NA	NA	NA	NA	NA	NA	NA	NA	NA	NA	NA	NA	0.167887	6.17418	0.481201	0.733713
ADORA2B	0.342923	4.8676	0.18315	0.420296	FALSE	0.368706	5.36147	0.114506	0.437624	FALSE	0.378755	4.70595	0.176631	0.548911	FALSE	0.275048	5.02406	0.108437	0.347338	FALSE	0.350825	4.6065	0.192677	0.448955	FALSE	0.395526	5.14607	0.072164	0.365844	FALSE	0.348782	4.77481	0.182575	0.451786	FALSE	0.456654	4.5331	0.0661616	0.310882	FALSE	0.36838	5.82421	0.0630439	0.333389	FALSE	NA	NA	NA	NA
ADPGK	-0.327873	5.86774	0.00453271	0.0727098	TRUE	-0.0810602	6.44439	0.391049	0.713443	FALSE	-0.0289039	6.27149	0.816989	0.943981	FALSE	-0.273543	5.62382	0.0145159	0.130899	FALSE	-0.177492	6.27848	0.0543032	0.237502	FALSE	-0.147857	5.98247	0.208451	0.546554	FALSE	-0.215496	5.89859	0.0240852	0.174717	FALSE	-0.0643436	6.18264	0.525449	0.777974	FALSE	-0.0809041	5.75327	0.458391	0.745387	FALSE	-0.0924743	6.08577	0.667325	0.845165
ADPRH	0.00973079	3.13682	0.948791	0.975845	FALSE	-0.0439092	3.50304	0.77732	0.919226	FALSE	0.00519207	3.39905	0.973645	0.993627	FALSE	-0.199987	3.1847	0.320768	0.602371	FALSE	0.0361863	3.31542	0.79226	0.906759	FALSE	-0.137729	3.21682	0.443699	0.737542	FALSE	-0.194524	3.20715	0.214847	0.485964	FALSE	0.00903651	3.47883	0.962618	0.98616	FALSE	NA	NA	NA	NA	NA	NA	NA	NA	NA
ADPRHL2	0.0415706	5.28658	0.807857	0.904846	FALSE	-0.0315463	5.04882	0.824498	0.93744	FALSE	0.0429064	5.08508	0.808009	0.942199	FALSE	-0.0553922	4.75342	0.736722	0.886602	FALSE	-0.0290633	4.98882	0.833419	0.926424	FALSE	0.161087	5.2147	0.264997	0.606256	FALSE	0.0743443	5.25124	0.592001	0.795693	FALSE	0.224711	5.6475	0.0888889	0.353193	FALSE	0.151699	5.47315	0.397151	0.704583	FALSE	NA	NA	NA	NA
ADPRM	0.0130681	3.11435	0.937067	0.969987	FALSE	-0.0393363	3.35647	0.793752	0.92584	FALSE	0.122391	3.35653	0.474234	0.783044	FALSE	-0.137674	2.88636	0.340125	0.619339	FALSE	-0.20099	3.39929	0.211174	0.474698	FALSE	0.203035	3.2506	0.340313	0.668584	FALSE	0.126551	3.13562	0.414559	0.667379	FALSE	0.0650771	3.47947	0.637868	0.842607	FALSE	NA	NA	NA	NA	NA	NA	NA	NA	NA
ADRB2	NA	NA	NA	NA	NA	NA	NA	NA	NA	NA	NA	NA	NA	NA	NA	0.0767791	3.41579	0.748753	0.892847	FALSE	NA	NA	NA	NA	NA	NA	NA	NA	NA	NA	NA	NA	NA	NA	NA	NA	NA	NA	NA	NA	NA	NA	NA	NA	NA	NA	NA	NA	NA
ADRM1	0.343382	7.6135	0.0941195	0.295176	FALSE	0.133085	7.10839	0.401039	0.721244	FALSE	0.208569	7.1939	0.231091	0.602231	FALSE	0.227526	7.45954	0.109264	0.348706	FALSE	0.121496	7.23814	0.29585	0.561191	FALSE	0.432987	7.51142	0.0378034	0.293865	FALSE	0.265506	7.43032	0.109656	0.34564	FALSE	0.288889	7.38095	0.0427088	0.253298	FALSE	0.26719	8.14927	0.104941	0.404373	FALSE	0.316458	7.15689	0.0539193	0.303736
ADSL	0.0748984	5.02564	0.554977	0.752077	FALSE	0.0128945	4.83734	0.889889	0.962652	FALSE	0.137812	4.90691	0.283852	0.652447	FALSE	-0.184746	4.23746	0.129841	0.381711	FALSE	-0.039019	4.84925	0.661057	0.831633	FALSE	0.0244185	4.74609	0.844716	0.944706	FALSE	-0.00556611	5.06665	0.960042	0.985473	FALSE	0.0892241	5.00631	0.442515	0.720045	FALSE	0.0480039	4.66824	0.772062	0.91258	FALSE	NA	NA	NA	NA
ADSS	-0.0625313	5.28936	0.583209	0.770947	FALSE	-0.0791802	5.54497	0.415972	0.729276	FALSE	-0.0963812	5.45859	0.471572	0.78131	FALSE	-0.111131	5.68265	0.272973	0.557731	FALSE	0.270315	6.06093	0.0997191	0.321009	FALSE	0.0376827	5.50157	0.719726	0.892122	FALSE	-0.000388699	5.31284	0.997069	0.998786	FALSE	-0.0436768	5.34027	0.681861	0.863899	FALSE	-0.207188	5.76627	0.0649764	0.338345	FALSE	-0.0237216	5.73011	0.920661	0.964769
ADTRP	0.182542	6.96816	0.221931	0.464782	FALSE	0.185796	7.49148	0.221247	0.561655	FALSE	0.0892727	7.22327	0.620944	0.85649	FALSE	0.0980996	6.74527	0.578032	0.792321	FALSE	-0.485189	5.62979	0.0473104	0.219595	FALSE	0.0665423	6.96255	0.723974	0.894457	FALSE	-0.0150332	6.86448	0.916099	0.965487	FALSE	0.0709058	6.96155	0.673556	0.859921	FALSE	0.466085	6.5873	0.0333317	0.258948	FALSE	NA	NA	NA	NA
AEBP2	-0.268246	4.39177	0.0304584	0.170696	FALSE	-0.22579	5.61393	0.00841281	0.151815	FALSE	-0.264722	5.2501	0.032336	0.306702	FALSE	-0.134692	5.10279	0.359252	0.636629	FALSE	-0.239852	5.59309	0.00790574	0.0906663	TRUE	-0.0903498	5.30299	0.549409	0.80336	FALSE	-0.190479	4.3239	0.156546	0.41742	FALSE	-0.13335	4.89949	0.262851	0.571012	FALSE	0.0118069	5.14275	0.944169	0.981352	FALSE	-0.419527	6.84245	0.0601903	0.317996
AEN	-0.0115805	2.71792	0.948286	0.975845	FALSE	-0.141021	3.08632	0.34232	0.675518	FALSE	-0.338978	2.71063	0.190196	0.559393	FALSE	0.253397	3.99745	0.113449	0.355737	FALSE	0.136817	3.00072	0.500068	0.719769	FALSE	0.214028	3.22443	0.357659	0.67992	FALSE	NA	NA	NA	NA	NA	NA	NA	NA	NA	NA	0.0208609	4.41682	0.893553	0.96321	FALSE	NA	NA	NA	NA
AF117829.1	-0.339748	3.83162	0.261344	0.505131	FALSE	-0.301387	5.0399	0.24818	0.589552	FALSE	-0.0523983	5.56116	0.885678	0.966307	FALSE	-0.230839	5.22168	0.335634	0.614098	FALSE	0.0521887	5.49622	0.829911	0.925145	FALSE	-0.126562	4.64437	0.613664	0.835978	FALSE	0.012118	3.80312	0.967609	0.988992	FALSE	-0.0763137	4.95946	0.752968	0.903067	FALSE	-0.418823	4.59626	0.165331	0.49677	FALSE	0.147446	6.29084	0.44419	0.705109
AF127936.2	2.67967	4.75961	0.000429058	0.0259167	TRUE	1.30204	4.7361	0.0465664	0.306898	FALSE	1.72147	4.31098	0.0253974	0.28204	FALSE	1.38655	5.57465	0.00140504	0.0482499	TRUE	1.10212	2.94654	0.0145679	0.126811	FALSE	1.77951	4.78797	0.00362146	0.120207	FALSE	1.68307	4.62153	0.00869117	0.115521	FALSE	1.6448	4.66456	0.0108683	0.131662	FALSE	1.80121	4.83771	0.00862692	0.153317	FALSE	NA	NA	NA	NA
AFDN	-0.362467	5.42361	0.0235734	0.153787	FALSE	-0.201821	6.1583	0.110014	0.430604	FALSE	-0.429761	6.0288	0.0165931	0.238923	FALSE	0.0319938	6.05244	0.81746	0.927394	FALSE	-0.234007	5.39856	0.203743	0.463127	FALSE	-0.0490941	6.08494	0.755685	0.909994	FALSE	-0.165936	5.53136	0.279824	0.553993	FALSE	-0.126566	5.68053	0.416579	0.698936	FALSE	0.0183438	6.036	0.908207	0.967632	FALSE	-0.0738461	7.27886	0.72289	0.874762
AFF1	-0.397863	5.86229	0.0113321	0.107512	FALSE	-0.0785089	7.22845	0.514526	0.792616	FALSE	-0.132701	6.61219	0.40846	0.744851	FALSE	-0.308835	7.03208	0.04181	0.21447	FALSE	0.00207294	7.30369	0.985664	0.993216	FALSE	-0.0273309	6.82225	0.848303	0.94549	FALSE	-0.0559902	5.88099	0.703591	0.859862	FALSE	-0.0284376	6.55369	0.834965	0.940195	FALSE	-0.171429	6.94145	0.276764	0.60912	FALSE	-0.221092	7.94838	0.359366	0.655491
AFF3	NA	NA	NA	NA	NA	NA	NA	NA	NA	NA	NA	NA	NA	NA	NA	NA	NA	NA	NA	NA	NA	NA	NA	NA	NA	NA	NA	NA	NA	NA	NA	NA	NA	NA	NA	NA	NA	NA	NA	NA	NA	NA	NA	NA	NA	0.749449	5.85418	0.0870716	0.368985
AFF4	-0.149386	6.47201	0.228305	0.471151	FALSE	-0.16911	7.31307	0.0462752	0.305505	FALSE	-0.235038	7.0801	0.078024	0.419525	FALSE	0.0366126	7.63077	0.764808	0.901877	FALSE	-0.11043	7.38543	0.150881	0.39558	FALSE	-0.0734551	7.0755	0.492531	0.772279	FALSE	-0.17598	6.40191	0.100419	0.334743	FALSE	-0.154324	6.82608	0.137742	0.425319	FALSE	-0.0515671	7.45698	0.589783	0.826708	FALSE	-0.26463	7.04737	0.135271	0.445337
AFG1L	-0.364582	2.99898	0.115663	0.330062	FALSE	0.0489066	4.46998	0.725484	0.898457	FALSE	0.0609739	3.9825	0.768745	0.923951	FALSE	-0.251723	3.07853	0.252157	0.534855	FALSE	-0.21555	4.06457	0.202496	0.461164	FALSE	-0.200028	3.64417	0.403838	0.711185	FALSE	-0.330153	3.18757	0.0640705	0.27118	FALSE	-0.0922261	3.69583	0.646164	0.84746	FALSE	NA	NA	NA	NA	NA	NA	NA	NA	NA
AFG3L2	-0.117006	5.2397	0.268299	0.513486	FALSE	-0.0101854	5.69533	0.894293	0.963181	FALSE	-0.0639852	5.54015	0.526526	0.810889	FALSE	-0.209234	5.03923	0.0606886	0.260514	FALSE	0.00749988	5.64201	0.930073	0.969846	FALSE	-0.0974369	5.601	0.317463	0.651631	FALSE	-0.0155541	5.2341	0.87471	0.949835	FALSE	0.0297212	5.41233	0.741018	0.895274	FALSE	-0.0952164	5.51973	0.450365	0.742018	FALSE	NA	NA	NA	NA
AFMID	0.0769017	1.3803	0.760603	0.875402	FALSE	NA	NA	NA	NA	NA	NA	NA	NA	NA	NA	-0.00108296	3.05472	0.997456	0.998571	FALSE	NA	NA	NA	NA	NA	NA	NA	NA	NA	NA	NA	NA	NA	NA	NA	NA	NA	NA	NA	NA	NA	NA	NA	NA	NA	NA	NA	NA	NA
AFTPH	-0.186214	5.62916	0.0277074	0.165038	FALSE	-0.115218	6.54477	0.0827196	0.38249	FALSE	-0.211417	6.22543	0.0103472	0.211343	FALSE	0.0391303	6.41552	0.714389	0.874108	FALSE	-0.0145524	6.7123	0.846844	0.930812	FALSE	-0.00898067	6.25597	0.926296	0.9794	FALSE	-0.083683	5.56903	0.338887	0.606228	FALSE	-0.0425725	6.02872	0.620391	0.834014	FALSE	-0.120538	6.37551	0.278711	0.61044	FALSE	-0.246026	7.20442	0.0890086	0.371816
AGA	0.225649	4.01615	0.0854317	0.283386	FALSE	0.114375	3.75849	0.281224	0.620639	FALSE	0.130461	3.81915	0.323878	0.688189	FALSE	0.0999732	3.68777	0.48666	0.733289	FALSE	0.00412404	3.80622	0.971541	0.986632	FALSE	0.342999	3.76543	0.0285127	0.266526	FALSE	0.195703	4.02448	0.0911058	0.318464	FALSE	0.194155	3.9852	0.0837422	0.344786	FALSE	NA	NA	NA	NA	NA	NA	NA	NA	NA
AGAP1	-0.389948	1.82227	0.257155	0.500007	FALSE	0.0651132	3.37895	0.840646	0.944586	FALSE	-0.0946531	2.55065	0.803274	0.940382	FALSE	NA	NA	NA	NA	NA	NA	NA	NA	NA	NA	-0.0715808	3.0979	0.857218	0.947928	FALSE	NA	NA	NA	NA	NA	NA	NA	NA	NA	NA	NA	NA	NA	NA	NA	NA	NA	NA	NA
AGAP3	-0.198313	5.38056	0.0283192	0.166195	FALSE	-0.198209	5.96775	0.00193766	0.0862258	FALSE	-0.149543	5.8157	0.161869	0.533938	FALSE	-0.109844	5.57554	0.322292	0.60357	FALSE	-0.0882563	6.14893	0.321116	0.583748	FALSE	-0.143927	5.7701	0.152489	0.488892	FALSE	-0.101644	5.36845	0.329574	0.597288	FALSE	-0.0697593	5.54932	0.502385	0.762805	FALSE	-0.289219	5.59191	0.0410862	0.281101	FALSE	NA	NA	NA	NA
AGBL3	NA	NA	NA	NA	NA	0.161524	1.81757	0.250306	0.591475	FALSE	NA	NA	NA	NA	NA	NA	NA	NA	NA	NA	NA	NA	NA	NA	NA	NA	NA	NA	NA	NA	NA	NA	NA	NA	NA	NA	NA	NA	NA	NA	NA	NA	NA	NA	NA	NA	NA	NA	NA
AGBL5	NA	NA	NA	NA	NA	0.0503432	2.90444	0.643249	0.862361	FALSE	-0.0290834	2.65911	0.852569	0.953116	FALSE	0.216627	2.64545	0.165732	0.432777	FALSE	0.11387	2.88809	0.384402	0.633017	FALSE	0.208957	2.86099	0.310202	0.645152	FALSE	NA	NA	NA	NA	NA	NA	NA	NA	NA	NA	NA	NA	NA	NA	NA	NA	NA	NA	NA
AGFG1	-0.0791741	6.8657	0.560702	0.756399	FALSE	-0.0115249	7.48231	0.927179	0.976506	FALSE	-0.0872314	7.31637	0.571305	0.834368	FALSE	-0.00962756	7.04865	0.923006	0.970294	FALSE	-0.0933463	7.05078	0.354281	0.611415	FALSE	0.0412736	7.31615	0.751962	0.908414	FALSE	-0.161962	6.81266	0.196067	0.465678	FALSE	-0.0136932	7.02966	0.912625	0.969954	FALSE	0.0206743	7.38199	0.827983	0.936544	FALSE	-0.179824	6.86271	0.302824	0.619299
AGGF1	-0.106196	5.39947	0.432758	0.659196	FALSE	0.107033	5.74282	0.29008	0.630701	FALSE	0.0510035	5.4908	0.696356	0.89393	FALSE	-0.258312	4.80715	0.0815175	0.303205	FALSE	-0.193321	5.36214	0.0479051	0.22097	FALSE	-0.0398014	5.48308	0.772028	0.916246	FALSE	0.00638044	5.46169	0.947644	0.980364	FALSE	0.082605	5.46095	0.44256	0.720045	FALSE	-0.010882	5.19578	0.952649	0.982523	FALSE	NA	NA	NA	NA
AGK	0.0658671	3.11472	0.728979	0.860534	FALSE	0.199857	4.07648	0.193668	0.534614	FALSE	0.46469	4.05818	0.0330346	0.307769	FALSE	0.13869	2.67993	0.485824	0.732472	FALSE	0.134679	4.05188	0.355497	0.612384	FALSE	0.272084	3.62553	0.176767	0.514619	FALSE	0.0713479	3.26838	0.695993	0.855375	FALSE	0.0916395	3.66536	0.651004	0.849871	FALSE	NA	NA	NA	NA	NA	NA	NA	NA	NA
AGL	-0.047723	3.58045	0.724987	0.858021	FALSE	0.0822993	4.21048	0.456054	0.757878	FALSE	0.0815338	3.89863	0.655891	0.872686	FALSE	-0.0622217	3.0503	0.664651	0.84525	FALSE	-0.206822	3.80027	0.105611	0.331978	FALSE	-0.0892998	3.80182	0.487752	0.768794	FALSE	-0.0867183	3.50383	0.527991	0.751792	FALSE	0.0494872	3.8264	0.717136	0.88303	FALSE	NA	NA	NA	NA	NA	NA	NA	NA	NA
AGO1	-0.1588	2.86403	0.210459	0.453313	FALSE	0.00430813	3.91465	0.966137	0.990548	FALSE	0.00754467	3.38297	0.959712	0.989995	FALSE	-0.246862	2.86338	0.113258	0.35546	FALSE	-0.284661	3.63608	0.0148316	0.127707	FALSE	-0.284141	3.42071	0.0866812	0.395628	FALSE	-0.139465	2.84931	0.369137	0.629398	FALSE	NA	NA	NA	NA	NA	NA	NA	NA	NA	NA	NA	NA	NA	NA
AGO2	0.0131426	4.87241	0.917786	0.961186	FALSE	-0.138355	5.769	0.157826	0.496151	FALSE	-0.227791	5.58424	0.0712151	0.403354	FALSE	-0.0191216	5.84471	0.897993	0.959409	FALSE	-0.03161	6.04843	0.797367	0.909187	FALSE	0.0103724	5.64941	0.929504	0.980202	FALSE	0.0217897	4.87914	0.847376	0.937482	FALSE	-0.0347268	5.14286	0.776389	0.914693	FALSE	0.113142	6.01921	0.342568	0.659576	FALSE	-0.313336	6.61601	0.0826441	0.357272
AGO3	-0.444856	5.50515	0.00495745	0.075118	TRUE	-0.159208	6.83439	0.0506629	0.317105	FALSE	-0.211814	6.42967	0.0633799	0.384255	FALSE	-0.391347	6.39296	0.00571223	0.0852331	TRUE	-0.119595	6.77338	0.123134	0.357837	FALSE	-0.242768	6.35829	0.0304093	0.272085	FALSE	-0.291464	5.4182	0.0304867	0.195595	FALSE	-0.260957	6.08738	0.0362792	0.232589	FALSE	-0.285592	6.33641	0.044	0.288345	FALSE	-0.614189	6.29711	3.25441e-05	0.0113676
AGO4	-0.268727	5.05907	0.0968437	0.299132	FALSE	-0.0411797	6.23355	0.64104	0.861715	FALSE	-0.112049	5.88696	0.352726	0.707793	FALSE	-0.175185	5.4132	0.363193	0.639861	FALSE	-0.308512	5.91337	0.00604979	0.0790022	TRUE	-0.244104	5.8998	0.115055	0.440298	FALSE	-0.218387	5.05101	0.100742	0.334878	FALSE	-0.124283	5.52609	0.327693	0.635192	FALSE	-0.188149	5.96684	0.353613	0.667238	FALSE	-0.311958	5.4039	0.182486	0.500724
AGPAT1	0.0193045	3.02942	0.876097	0.940618	FALSE	-0.0825983	3.11656	0.359729	0.687887	FALSE	0.0974704	3.07238	0.496107	0.794205	FALSE	0.0953803	2.82902	0.548575	0.773808	FALSE	0.0854754	3.14943	0.512992	0.729423	FALSE	-0.150434	3.01563	0.393312	0.703411	FALSE	0.00269991	3.03779	0.985828	0.995417	FALSE	NA	NA	NA	NA	NA	NA	NA	NA	NA	NA	NA	NA	NA	NA
AGPAT2	0.218537	6.53744	0.171998	0.407257	FALSE	-0.060363	6.06091	0.673401	0.877243	FALSE	-0.0441231	6.0275	0.781933	0.9321	FALSE	0.0191574	6.18674	0.872858	0.949152	FALSE	-0.0801319	5.58215	0.47095	0.697953	FALSE	0.0141812	6.27908	0.932714	0.9809	FALSE	-0.0036091	6.39256	0.980712	0.993385	FALSE	-0.0512442	6.23573	0.674692	0.860343	FALSE	-0.0588271	6.48035	0.75095	0.905063	FALSE	NA	NA	NA	NA
AGPAT3	-0.183022	5.69708	0.162838	0.396345	FALSE	-0.135658	6.42866	0.183406	0.524421	FALSE	-0.142629	6.19321	0.275298	0.64605	FALSE	-0.0372985	5.69966	0.765341	0.902036	FALSE	-0.201332	6.22862	0.0697644	0.270021	FALSE	-0.0694054	6.11372	0.509572	0.780784	FALSE	-0.18529	5.7122	0.0828677	0.305765	FALSE	0.0439402	6.19985	0.676605	0.860927	FALSE	-0.140258	5.8894	0.255405	0.592416	FALSE	-0.115846	6.45283	0.542384	0.77741
AGPAT4	-0.0616428	4.85492	0.768564	0.8801	FALSE	0.226563	6.25142	0.182106	0.522112	FALSE	0.0945202	5.93523	0.64253	0.864981	FALSE	0.166692	5.78409	0.42617	0.689505	FALSE	0.366528	6.2288	0.0452674	0.214987	FALSE	0.291184	5.61017	0.10805	0.43154	FALSE	0.262481	5.0251	0.161404	0.424648	FALSE	0.209461	5.4284	0.278407	0.584459	FALSE	0.180137	5.57346	0.487748	0.761736	FALSE	NA	NA	NA	NA
AGPAT5	-0.24407	3.09477	0.192281	0.431009	FALSE	0.0725748	3.40731	0.62908	0.855604	FALSE	0.0431239	3.13502	0.851951	0.952938	FALSE	-0.1764	2.85858	0.368209	0.643997	FALSE	-0.0459712	3.59931	0.833507	0.926424	FALSE	0.0642899	3.28903	0.734815	0.900146	FALSE	-0.0258666	3.10236	0.888181	0.954523	FALSE	NA	NA	NA	NA	NA	NA	NA	NA	NA	NA	NA	NA	NA	NA
AGPS	-0.218042	7.12074	0.122461	0.338059	FALSE	-0.178749	7.86062	0.142726	0.477302	FALSE	-0.250408	7.32797	0.0813124	0.428025	FALSE	-0.150636	7.40078	0.23052	0.511361	FALSE	-0.272388	6.89622	0.0340921	0.186914	FALSE	-0.0384302	7.49297	0.787147	0.921925	FALSE	-0.247903	6.94697	0.051759	0.245416	FALSE	-0.129642	7.2057	0.282609	0.590077	FALSE	-0.0114286	7.74483	0.925211	0.974439	FALSE	-0.47825	6.59957	0.0308047	0.247358
AGRP	0.477558	4.27012	0.0689344	0.252975	FALSE	0.230267	3.77259	0.262771	0.603918	FALSE	0.187926	3.76265	0.475197	0.783677	FALSE	0.632729	5.21152	0.0448603	0.22255	FALSE	NA	NA	NA	NA	NA	0.697639	4.0219	0.0124236	0.186842	FALSE	0.647201	4.23674	0.00146368	0.047701	TRUE	NA	NA	NA	NA	NA	NA	NA	NA	NA	NA	NA	NA	NA	NA
AGTPBP1	-0.1974	4.65058	0.191003	0.430143	FALSE	0.0594926	5.77631	0.561814	0.818127	FALSE	-0.0143899	5.48062	0.920324	0.978565	FALSE	-0.236338	5.36629	0.221271	0.500035	FALSE	-0.100323	6.04626	0.294983	0.560381	FALSE	-0.0847287	5.43281	0.602147	0.829195	FALSE	-0.216069	4.63476	0.10969	0.34564	FALSE	-0.210069	5.03213	0.115866	0.394618	FALSE	-0.29553	5.63564	0.15687	0.487478	FALSE	-0.350675	6.23148	0.0472885	0.28866
AGTRAP	0.0118862	6.21924	0.935061	0.968945	FALSE	-0.0916247	5.77487	0.395716	0.717408	FALSE	0.0399427	6.01782	0.788401	0.935057	FALSE	-0.220844	5.63771	0.130412	0.382791	FALSE	-0.0597196	5.94108	0.631643	0.813284	FALSE	-0.15547	5.89458	0.323533	0.65718	FALSE	-0.109571	6.28494	0.392659	0.651107	FALSE	-0.11515	6.18028	0.312488	0.619258	FALSE	0.0518098	5.5238	0.731873	0.898072	FALSE	NA	NA	NA	NA
AHCTF1	-0.252155	4.9443	0.0122287	0.111256	FALSE	-0.0565415	5.71993	0.452431	0.755442	FALSE	-0.0390694	5.47384	0.708306	0.89931	FALSE	-0.225927	5.64587	0.0357028	0.199234	FALSE	-0.101785	5.56214	0.272948	0.538419	FALSE	0.0439332	5.48698	0.640835	0.849886	FALSE	-0.027768	4.93397	0.778582	0.90296	FALSE	-0.13086	5.1629	0.223603	0.530424	FALSE	-0.148162	5.64	0.239493	0.577077	FALSE	-0.355062	5.85426	0.089936	0.372653
AHCY	0.026923	3.77951	0.853619	0.92948	FALSE	-0.206861	3.59407	0.0268944	0.2464	FALSE	0.0256052	3.52281	0.841159	0.949979	FALSE	-0.0935229	3.65661	0.621967	0.817379	FALSE	-0.0122714	3.48357	0.918855	0.965304	FALSE	-0.255433	3.60181	0.0663318	0.358151	FALSE	-0.109787	3.7069	0.431315	0.681367	FALSE	-0.2603	3.60553	0.049242	0.273556	FALSE	NA	NA	NA	NA	NA	NA	NA	NA	NA
AHCYL1	0.0401738	6.14776	0.720665	0.856073	FALSE	0.0649303	6.59247	0.498662	0.784193	FALSE	0.0765954	6.4254	0.492306	0.792735	FALSE	0.0207145	6.11371	0.821129	0.928013	FALSE	0.11026	6.58723	0.214789	0.478641	FALSE	0.0722232	6.33831	0.455986	0.747537	FALSE	0.0625626	6.19906	0.545326	0.766145	FALSE	0.0929368	6.35738	0.302234	0.609429	FALSE	-0.130451	6.10909	0.330419	0.648176	FALSE	0.228952	5.73855	0.337151	0.638302
AHCYL2	-0.553475	4.19143	0.00477114	0.0735308	TRUE	-0.11967	5.6751	0.227824	0.567027	FALSE	-0.184118	5.09091	0.256169	0.628707	FALSE	-0.478891	5.11905	0.0259631	0.174388	FALSE	-0.38255	5.53902	0.00245996	0.0506058	TRUE	-0.294239	5.23494	0.0819991	0.386167	FALSE	-0.293992	4.18819	0.0611277	0.263971	FALSE	-0.24375	4.84892	0.13557	0.422828	FALSE	-0.515594	5.0123	0.0254	0.236793	FALSE	-0.393078	5.9914	0.0396731	0.273955
AHDC1	NA	NA	NA	NA	NA	NA	NA	NA	NA	NA	NA	NA	NA	NA	NA	NA	NA	NA	NA	NA	-0.0451442	2.50592	0.778209	0.900473	FALSE	NA	NA	NA	NA	NA	NA	NA	NA	NA	NA	NA	NA	NA	NA	NA	NA	NA	NA	NA	NA	NA	NA	NA	NA
AHI1	-0.264641	5.81533	0.148054	0.376324	FALSE	-0.0562826	7.00103	0.727629	0.89901	FALSE	-0.253432	6.31599	0.1606	0.53222	FALSE	-0.200719	6.54581	0.189187	0.463555	FALSE	0.191194	6.3263	0.236248	0.501474	FALSE	0.0484998	6.56069	0.755489	0.909994	FALSE	-0.0771866	5.71673	0.638743	0.825678	FALSE	-0.0606139	5.93673	0.734668	0.892863	FALSE	-0.0930587	6.66568	0.530402	0.79067	FALSE	0.229147	5.9167	0.340813	0.639937
AHNAK	0.0156353	8.10208	0.90993	0.957389	FALSE	-0.10736	8.70777	0.358604	0.687297	FALSE	-0.0219029	8.56323	0.888784	0.967334	FALSE	0.00628651	8.05431	0.961787	0.984935	FALSE	-0.109517	8.73053	0.32574	0.587052	FALSE	-0.176783	8.44431	0.0998353	0.417681	FALSE	-0.144157	8.04029	0.238191	0.512787	FALSE	-0.0269086	8.37359	0.812163	0.931315	FALSE	-0.0479703	8.50864	0.67926	0.874804	FALSE	-0.259575	7.50375	0.18708	0.504594
AHR	-0.0972216	6.96099	0.49375	0.706097	FALSE	-0.187334	7.51569	0.0828109	0.38249	FALSE	-0.13894	7.72204	0.307071	0.673352	FALSE	-0.0448794	7.71634	0.734446	0.885287	FALSE	-0.0183227	8.16997	0.866147	0.939897	FALSE	-0.0836076	7.51706	0.51522	0.784373	FALSE	-0.244747	6.94498	0.0353344	0.206352	FALSE	-0.12142	7.1992	0.286945	0.594956	FALSE	-0.104892	7.80814	0.378965	0.689031	FALSE	0.0455667	8.74871	0.821525	0.923024
AHRR	NA	NA	NA	NA	NA	NA	NA	NA	NA	NA	NA	NA	NA	NA	NA	NA	NA	NA	NA	NA	0.435874	5.35981	0.122508	0.357064	FALSE	NA	NA	NA	NA	NA	NA	NA	NA	NA	NA	NA	NA	NA	NA	NA	NA	NA	NA	NA	NA	-0.114748	6.91888	0.720639	0.873722
AHSA1	0.00463925	5.98302	0.974949	0.987864	FALSE	-0.0569842	5.72835	0.667635	0.876335	FALSE	-0.0585519	5.74239	0.724817	0.906402	FALSE	0.120228	6.91402	0.453561	0.708639	FALSE	0.0242735	5.90957	0.839565	0.928509	FALSE	0.227972	5.94815	0.127674	0.458751	FALSE	0.0258092	5.9765	0.842383	0.934887	FALSE	-0.0915492	5.92679	0.439595	0.718695	FALSE	0.0891962	6.51285	0.631566	0.850524	FALSE	0.308932	5.9346	0.0972195	0.386122
AIDA	0.120989	5.71882	0.330531	0.570966	FALSE	0.160885	6.11079	0.145074	0.48045	FALSE	0.135045	6.02644	0.354029	0.708675	FALSE	0.00423001	5.65959	0.968207	0.987541	FALSE	0.172469	6.10862	0.128937	0.366295	FALSE	0.142133	6.04928	0.241119	0.579065	FALSE	0.203267	5.68377	0.10229	0.336423	FALSE	0.292675	6.28854	0.0189583	0.169399	FALSE	-0.001886	6.2247	0.988115	0.996726	FALSE	-0.132141	5.661	0.495074	0.742925
AIF1	0.138398	7.98229	0.640235	0.809045	FALSE	-0.214919	7.43981	0.354514	0.684068	FALSE	-0.374521	7.52181	0.235132	0.60553	FALSE	0.462812	8.02213	0.179087	0.450068	FALSE	-0.115402	7.47638	0.669916	0.835831	FALSE	-0.000643085	7.52483	0.998066	0.999373	FALSE	-0.0391584	8.07576	0.866888	0.946559	FALSE	-0.108568	7.80512	0.648462	0.84928	FALSE	0.414573	7.55894	0.294502	0.619613	FALSE	NA	NA	NA	NA
AIFM1	-0.170621	4.04964	0.152072	0.381666	FALSE	0.0383479	4.24437	0.675409	0.878086	FALSE	0.0181078	4.14131	0.887512	0.966697	FALSE	-0.173368	3.35879	0.272808	0.557731	FALSE	0.0341453	4.29996	0.750749	0.884499	FALSE	0.139755	4.00095	0.236521	0.575927	FALSE	-0.0874093	4.058	0.503078	0.735889	FALSE	0.0415161	4.14075	0.713766	0.881021	FALSE	NA	NA	NA	NA	NA	NA	NA	NA	NA
AIFM2	-0.00545402	6.06627	0.981039	0.991265	FALSE	0.0876821	5.93525	0.607393	0.845543	FALSE	0.171277	6.11506	0.398632	0.738444	FALSE	-0.246987	5.10402	0.20002	0.475263	FALSE	0.063605	6.09167	0.694728	0.848878	FALSE	0.200113	6.05786	0.227529	0.565066	FALSE	0.174075	6.07717	0.271918	0.547541	FALSE	0.252034	6.049	0.155913	0.44915	FALSE	0.138215	6.15953	0.523552	0.78629	FALSE	NA	NA	NA	NA
AIG1	0.0466213	4.08306	0.801831	0.90112	FALSE	0.0285971	4.20257	0.853286	0.950478	FALSE	-0.249784	3.81246	0.123858	0.489273	FALSE	0.286827	4.30703	0.27039	0.556102	FALSE	-0.12265	2.67901	0.471314	0.698151	FALSE	0.151037	3.97426	0.455632	0.74749	FALSE	0.0640476	3.85829	0.666209	0.840327	FALSE	0.119794	3.86288	0.445574	0.720622	FALSE	NA	NA	NA	NA	NA	NA	NA	NA	NA
AIM2	-0.793316	3.1762	0.0645719	0.246872	FALSE	-0.593817	3.38173	0.146167	0.48268	FALSE	-0.482965	3.23175	0.323608	0.68776	FALSE	-0.241824	3.82307	0.435029	0.695903	FALSE	-0.798496	3.00706	0.089149	0.304737	FALSE	-0.344554	3.36334	0.341865	0.669571	FALSE	-0.706149	3.07337	0.0710203	0.283918	FALSE	-0.290345	4.72831	0.300433	0.606984	FALSE	NA	NA	NA	NA	NA	NA	NA	NA	NA
AIMP1	0.415337	6.39218	0.00144413	0.0447129	TRUE	0.327984	6.30551	0.00095319	0.0738609	TRUE	0.358862	6.32632	0.0066463	0.17806	FALSE	0.142703	6.04711	0.213435	0.492059	FALSE	0.188122	6.29967	0.0605115	0.250104	FALSE	0.367673	6.35988	0.00465638	0.128583	FALSE	0.231126	6.35462	0.0254232	0.179885	FALSE	0.249678	6.36498	0.0176246	0.16372	FALSE	0.0427199	6.49144	0.749917	0.905063	FALSE	0.344447	6.25421	0.0638413	0.326836
AIMP2	0.118837	4.2695	0.389815	0.621627	FALSE	0.218594	4.32151	0.0523874	0.320115	FALSE	0.313371	4.27496	0.0335638	0.308217	FALSE	-0.0107046	3.62526	0.93428	0.975297	FALSE	0.116786	4.38203	0.233084	0.498448	FALSE	0.105361	4.34729	0.403749	0.711185	FALSE	0.0952909	4.34508	0.50636	0.737423	FALSE	0.0898851	4.29722	0.41724	0.699437	FALSE	NA	NA	NA	NA	NA	NA	NA	NA	NA
AIP	-0.0554773	5.23776	0.719196	0.855238	FALSE	-0.244085	4.76239	0.0593751	0.338272	FALSE	-0.0826059	4.78972	0.572532	0.83484	FALSE	-0.10037	5.07071	0.412775	0.678979	FALSE	0.0345278	4.83478	0.784832	0.902876	FALSE	0.033584	4.98672	0.830474	0.938966	FALSE	-0.174875	5.07495	0.225741	0.499299	FALSE	-0.0860123	5.03025	0.462003	0.731828	FALSE	0.00989059	5.1006	0.961618	0.987725	FALSE	NA	NA	NA	NA
AK1	-0.0581466	2.10654	0.805055	0.903232	FALSE	-0.336689	2.09954	0.107937	0.427446	FALSE	-0.131301	1.59837	0.587399	0.842321	FALSE	0.0107493	2.37942	0.96295	0.985151	FALSE	NA	NA	NA	NA	NA	NA	NA	NA	NA	NA	NA	NA	NA	NA	NA	NA	NA	NA	NA	NA	NA	NA	NA	NA	NA	NA	NA	NA	NA
AK2	0.21361	4.73171	0.207312	0.450214	FALSE	0.000848378	4.71741	0.99517	0.999004	FALSE	0.141069	4.65608	0.425438	0.754724	FALSE	0.173996	4.59448	0.314106	0.596235	FALSE	-0.203683	4.58911	0.10334	0.327353	FALSE	0.102235	4.58697	0.548981	0.80336	FALSE	0.16362	4.69226	0.223168	0.495507	FALSE	0.114801	4.97394	0.362863	0.66489	FALSE	0.373595	4.51901	0.0701208	0.349094	FALSE	NA	NA	NA	NA
AK3	0.0352145	4.85489	0.741559	0.866309	FALSE	0.0771428	5.18099	0.419054	0.732135	FALSE	-0.149425	5.08641	0.364039	0.717748	FALSE	0.179958	4.75921	0.116356	0.361619	FALSE	-0.223818	4.539	0.147503	0.391309	FALSE	-0.0126536	5.09143	0.927581	0.980045	FALSE	0.0269139	4.87762	0.816318	0.92256	FALSE	0.116738	5.06311	0.321794	0.628163	FALSE	-0.129636	5.06947	0.324849	0.642749	FALSE	NA	NA	NA	NA
AK4	NA	NA	NA	NA	NA	NA	NA	NA	NA	NA	0.307872	3.42655	0.460737	0.776183	FALSE	-0.0905638	2.56276	0.800298	0.918766	FALSE	0.377034	5.32443	0.124798	0.36082	FALSE	NA	NA	NA	NA	NA	NA	NA	NA	NA	NA	NA	NA	NA	NA	NA	NA	NA	NA	NA	NA	NA	NA	NA	NA
AK6	0.451454	6.25376	0.00766935	0.0888352	TRUE	0.189502	5.88207	0.133189	0.463708	FALSE	0.251937	5.92651	0.120053	0.485186	FALSE	0.430142	6.11417	0.0329794	0.193862	FALSE	0.178006	5.85002	0.141762	0.384236	FALSE	0.471803	6.14783	0.00198739	0.0961666	TRUE	0.279701	6.1793	0.047854	0.236664	FALSE	0.315077	6.05844	0.0288447	0.207499	FALSE	0.571402	6.60594	0.00433144	0.114736	FALSE	0.463493	5.46242	0.0278985	0.235935
AK8	-0.118239	2.6186	0.700592	0.845653	FALSE	-0.0322514	3.22006	0.899916	0.966239	FALSE	-0.328471	3.02231	0.30222	0.668934	FALSE	-0.352789	2.92786	0.241823	0.523923	FALSE	0.377152	3.58002	0.0656245	0.261791	FALSE	0.021777	3.84934	0.943144	0.983675	FALSE	0.00752535	2.45217	0.981318	0.993385	FALSE	NA	NA	NA	NA	NA	NA	NA	NA	NA	NA	0.628349	6.40435	0.0386173	0.269242
AK9	-0.28534	2.82531	0.155808	0.386718	FALSE	-0.121015	3.83975	0.492001	0.780876	FALSE	-0.271492	3.37272	0.22192	0.5947	FALSE	-0.248769	3.93341	0.201874	0.476877	FALSE	-0.217075	3.47804	0.212704	0.476516	FALSE	-0.0575757	3.71786	0.816429	0.931834	FALSE	0.0326196	2.82003	0.884939	0.953895	FALSE	-0.198247	3.23065	0.349815	0.654624	FALSE	0.0165773	4.16369	0.935645	0.977956	FALSE	NA	NA	NA	NA
AKAP1	-0.0362348	3.54272	0.820299	0.912853	FALSE	0.0470024	4.05543	0.714796	0.89379	FALSE	0.135755	3.558	0.460145	0.775626	FALSE	-0.255898	3.27654	0.139598	0.396482	FALSE	0.060141	3.38292	0.696091	0.84965	FALSE	-0.0560536	3.72084	0.754901	0.909891	FALSE	-0.092869	3.46874	0.485921	0.725254	FALSE	0.0973423	3.52188	0.454336	0.728065	FALSE	NA	NA	NA	NA	NA	NA	NA	NA	NA
AKAP10	-0.137859	4.70788	0.325115	0.566828	FALSE	0.00651745	5.93979	0.940595	0.981968	FALSE	-0.0770758	5.56775	0.528419	0.811918	FALSE	-0.449424	5.08049	0.00559462	0.0843913	TRUE	-0.0415074	5.89427	0.658036	0.829615	FALSE	-0.184631	5.45484	0.101018	0.419712	FALSE	-0.260445	4.74794	0.0214098	0.166226	FALSE	-0.0871768	5.26144	0.486797	0.752026	FALSE	-0.309	5.45789	0.0379661	0.271589	FALSE	-0.29124	5.76732	0.161071	0.476798
AKAP11	-0.0757743	3.83995	0.641127	0.809752	FALSE	0.0424533	4.63812	0.717707	0.894369	FALSE	0.104993	4.38343	0.568331	0.832418	FALSE	-0.00952132	3.25107	0.959759	0.984196	FALSE	-0.210722	4.28271	0.129114	0.366295	FALSE	-0.134944	4.0663	0.42627	0.726068	FALSE	-0.227193	3.95121	0.138449	0.389776	FALSE	0.00458023	4.20314	0.974979	0.990446	FALSE	NA	NA	NA	NA	NA	NA	NA	NA	NA
AKAP13	-0.179987	8.00245	0.211674	0.454425	FALSE	-0.156072	8.93092	0.171627	0.509491	FALSE	-0.276174	8.61156	0.0928046	0.44982	FALSE	0.111654	9.13549	0.419713	0.685371	FALSE	-0.031209	8.7668	0.773316	0.898295	FALSE	-0.0155366	8.61561	0.895581	0.965914	FALSE	-0.0957625	7.94682	0.423626	0.673154	FALSE	-0.20146	8.34457	0.0809872	0.340586	FALSE	-0.0944688	9.07847	0.426231	0.724101	FALSE	-0.267405	9.42542	0.097113	0.386122
AKAP17A	-0.0298365	3.46494	0.85083	0.928412	FALSE	-0.170624	3.95694	0.0867497	0.388722	FALSE	-0.100543	3.7262	0.483546	0.789278	FALSE	0.023668	4.37892	0.886786	0.954194	FALSE	-0.0849135	3.9767	0.445254	0.679656	FALSE	-0.000751356	3.81704	0.99586	0.998522	FALSE	0.136379	3.33759	0.25782	0.532923	FALSE	-0.0220769	3.63219	0.866073	0.954786	FALSE	0.145532	4.3473	0.337356	0.654331	FALSE	NA	NA	NA	NA
AKAP5	-0.615355	1.64731	0.0712742	0.256508	FALSE	-0.517446	2.25541	0.0920312	0.400288	FALSE	NA	NA	NA	NA	NA	-0.153301	2.08493	0.591621	0.800675	FALSE	NA	NA	NA	NA	NA	NA	NA	NA	NA	NA	NA	NA	NA	NA	NA	NA	NA	NA	NA	NA	NA	NA	NA	NA	NA	NA	NA	NA	NA
AKAP7	-0.0442559	4.13426	0.821413	0.913379	FALSE	-0.225312	4.75217	0.20918	0.549309	FALSE	-0.202086	4.49036	0.348893	0.704931	FALSE	0.0624089	3.96463	0.683514	0.856522	FALSE	-0.555164	3.66312	0.0239	0.157348	FALSE	-0.093694	4.42281	0.567018	0.811895	FALSE	-0.137026	4.0891	0.487791	0.726893	FALSE	0.135512	4.88891	0.46569	0.73466	FALSE	NA	NA	NA	NA	NA	NA	NA	NA	NA
AKAP8	-0.373048	3.73338	0.00108267	0.0387806	TRUE	-0.375714	4.21126	8.96365e-06	0.00730262	TRUE	-0.393269	4.02251	0.00197246	0.113211	FALSE	-0.350177	4.41988	0.00551292	0.0838137	TRUE	-0.162825	4.40015	0.081959	0.292186	FALSE	-0.155798	4.10236	0.279929	0.619608	FALSE	-0.244504	3.64757	0.022237	0.169108	FALSE	-0.282146	3.99074	0.019399	0.171538	FALSE	-0.469952	4.50848	0.000811917	0.0684808	TRUE	NA	NA	NA	NA
AKAP8L	0.0302782	4.71651	0.761213	0.875588	FALSE	-0.152161	5.11574	0.0347073	0.270167	FALSE	-0.174315	4.8497	0.0469145	0.342949	FALSE	0.0356808	5.16886	0.796834	0.91699	FALSE	-0.174013	5.18795	0.0276424	0.169195	FALSE	0.0166956	5.04759	0.874783	0.957771	FALSE	-0.0922234	4.52597	0.347733	0.61561	FALSE	0.100193	4.83448	0.25719	0.56522	FALSE	-0.179984	5.54759	0.414381	0.717182	FALSE	-0.356021	5.46563	0.113596	0.412465
AKAP9	-0.35599	6.56524	0.00376049	0.0680271	TRUE	-0.226557	7.12934	0.0196063	0.217461	FALSE	-0.221525	6.88595	0.0431461	0.331823	FALSE	-0.317207	6.59761	0.016745	0.14105	FALSE	-0.24032	6.53281	0.0142104	0.125126	FALSE	-0.148712	6.87641	0.327772	0.661456	FALSE	-0.258912	6.47331	0.0130174	0.136581	FALSE	-0.149995	6.75007	0.0756896	0.330944	FALSE	-0.455931	6.57883	0.00117343	0.0777115	TRUE	-0.0877691	6.21803	0.6902	0.861025
AKIP1	0.203136	4.09685	0.16875	0.403362	FALSE	0.113813	3.88149	0.308397	0.647715	FALSE	0.273495	3.89752	0.0608632	0.37736	FALSE	0.113927	3.46378	0.522633	0.758166	FALSE	-0.0163197	3.80165	0.900668	0.956326	FALSE	0.0140713	3.85556	0.926248	0.9794	FALSE	-0.0523394	4.11006	0.718121	0.866661	FALSE	0.270946	4.07549	0.0378411	0.237493	FALSE	NA	NA	NA	NA	NA	NA	NA	NA	NA
AKIRIN1	0.270328	5.54777	0.0238549	0.154415	FALSE	0.123521	5.8279	0.177924	0.518047	FALSE	0.100265	5.73461	0.384974	0.731012	FALSE	0.270393	5.93607	0.0531368	0.243813	FALSE	0.112752	5.99681	0.212589	0.476481	FALSE	0.213361	5.8997	0.0435026	0.311305	FALSE	0.143922	5.47951	0.149177	0.407352	FALSE	0.226648	5.6144	0.0404239	0.24596	FALSE	0.397199	6.28874	0.00241146	0.0948179	TRUE	0.186791	6.36533	0.304004	0.619899
AKIRIN2	-0.165772	7.07271	0.352229	0.591475	FALSE	-0.22446	7.03327	0.181282	0.521294	FALSE	-0.280377	6.81115	0.244264	0.615452	FALSE	0.0697915	7.66376	0.604746	0.806941	FALSE	-0.0483415	6.9026	0.751068	0.884551	FALSE	0.0618635	7.08521	0.735327	0.900293	FALSE	-0.00837997	6.98353	0.958335	0.985113	FALSE	0.0314089	7.06397	0.860941	0.952318	FALSE	0.0741974	7.8891	0.593064	0.829601	FALSE	0.126127	6.45527	0.575522	0.795175
AKNA	-0.309522	2.51291	0.0469363	0.212453	FALSE	-0.335588	3.45029	0.035998	0.275006	FALSE	-0.242845	2.98887	0.256963	0.628711	FALSE	-0.203693	2.74503	0.27857	0.561691	FALSE	-0.137594	3.05766	0.362532	0.616492	FALSE	-0.264814	2.97884	0.206132	0.54513	FALSE	NA	NA	NA	NA	NA	NA	NA	NA	NA	NA	NA	NA	NA	NA	NA	NA	NA	NA	NA
AKNAD1	NA	NA	NA	NA	NA	0.257583	2.75928	0.0797031	0.377689	FALSE	0.284749	2.42269	0.147312	0.518505	FALSE	NA	NA	NA	NA	NA	0.302933	2.67303	0.0706124	0.272104	FALSE	NA	NA	NA	NA	NA	NA	NA	NA	NA	NA	NA	NA	NA	NA	NA	NA	NA	NA	NA	NA	NA	NA	NA	NA
AKR1A1	-0.024064	7.47447	0.888777	0.946413	FALSE	-0.227174	6.98009	0.0671346	0.35238	FALSE	-0.156155	7.05805	0.314049	0.681059	FALSE	-0.0686349	6.80136	0.680768	0.854996	FALSE	-0.207865	6.95084	0.0817319	0.292053	FALSE	-0.0694034	6.93583	0.709097	0.886823	FALSE	-0.13166	7.53673	0.354327	0.619519	FALSE	-0.120068	7.28954	0.314162	0.620465	FALSE	0.0414618	6.48289	0.835602	0.939462	FALSE	-0.146472	5.77805	0.525336	0.765539
AKR1B1	-0.138453	8.70498	0.491287	0.704429	FALSE	-0.131049	8.57349	0.390532	0.712804	FALSE	-0.0892982	8.57852	0.632235	0.861595	FALSE	-0.0835743	7.99915	0.530411	0.762901	FALSE	-0.179457	8.2361	0.210134	0.473182	FALSE	-0.16514	8.63685	0.371531	0.689509	FALSE	-0.0591761	8.58799	0.700574	0.858028	FALSE	-0.0335684	8.626	0.813562	0.931815	FALSE	-0.208853	8.6364	0.204397	0.534336	FALSE	NA	NA	NA	NA
AKR1C1	0.840334	7.15389	0.0709677	0.255972	FALSE	0.841072	7.2368	0.0371889	0.279537	FALSE	0.753176	7.31029	0.130293	0.500109	FALSE	0.607573	6.95475	0.188846	0.463268	FALSE	0.820516	7.03278	0.0805668	0.289583	FALSE	1.17755	7.85391	0.0109508	0.177495	FALSE	1.194	6.70305	0.0021965	0.0591441	TRUE	1.06773	7.16797	0.00825399	0.116848	FALSE	0.594999	8.47947	0.186451	0.51564	FALSE	NA	NA	NA	NA
AKR1C2	1.41379	8.44654	0.000331451	0.0224722	TRUE	1.32139	8.36014	0.000141548	0.0365643	TRUE	1.27648	8.40973	0.0043158	0.155642	FALSE	0.70094	8.17434	0.076665	0.293933	FALSE	0.904716	7.25456	0.0237583	0.15689	FALSE	1.36009	8.92148	0.000222409	0.0425079	TRUE	1.33165	8.16702	2.00957e-05	0.00673903	TRUE	1.3304	8.41041	0.00011108	0.0166027	TRUE	1.13017	9.4609	0.00604071	0.133534	FALSE	NA	NA	NA	NA
AKR1C3	0.819544	8.04063	0.031668	0.174004	FALSE	0.582242	7.6219	0.128822	0.457082	FALSE	0.630926	7.84493	0.150687	0.522766	FALSE	0.49559	6.69471	0.051933	0.240577	FALSE	0.432199	6.352	0.300846	0.56492	FALSE	0.532666	7.8493	0.100936	0.419712	FALSE	0.508133	8.06462	0.144793	0.400396	FALSE	0.69206	7.75034	0.0693756	0.31765	FALSE	0.722173	7.58211	0.017683	0.213595	FALSE	NA	NA	NA	NA
AKR1C8P	NA	NA	NA	NA	NA	-0.209778	1.79581	0.501987	0.786354	FALSE	NA	NA	NA	NA	NA	NA	NA	NA	NA	NA	NA	NA	NA	NA	NA	NA	NA	NA	NA	NA	NA	NA	NA	NA	NA	NA	NA	NA	NA	NA	NA	NA	NA	NA	NA	NA	NA	NA	NA
AKR1E2	-0.588082	2.82031	0.0265802	0.162429	FALSE	-0.515348	3.86225	0.1185	0.444575	FALSE	-0.634246	2.74969	0.0396495	0.32034	FALSE	-0.348605	3.67105	0.26729	0.552907	FALSE	NA	NA	NA	NA	NA	-0.115829	3.37714	0.731123	0.897929	FALSE	NA	NA	NA	NA	NA	NA	NA	NA	NA	NA	NA	NA	NA	NA	NA	NA	NA	NA	NA
AKR7A2	0.0694066	5.28137	0.672823	0.827512	FALSE	0.0164553	4.74598	0.913136	0.970987	FALSE	-0.0349955	4.78619	0.834098	0.947607	FALSE	0.0965144	4.51568	0.607306	0.808425	FALSE	0.0033852	4.47585	0.98212	0.99132	FALSE	0.143128	4.79346	0.453477	0.74609	FALSE	0.149523	5.33299	0.256355	0.531122	FALSE	-0.0553626	4.98212	0.719009	0.88351	FALSE	0.0732379	4.24732	0.733202	0.898072	FALSE	NA	NA	NA	NA
AKT1	0.114249	4.50721	0.389406	0.621482	FALSE	-0.00385638	4.44561	0.968314	0.991095	FALSE	0.140925	4.39611	0.244665	0.616158	FALSE	0.210346	4.24108	0.173912	0.443578	FALSE	0.0663568	4.30768	0.50037	0.720096	FALSE	0.0776645	4.52887	0.55176	0.804276	FALSE	0.00988968	4.36656	0.937313	0.976046	FALSE	0.177688	4.52391	0.127931	0.410761	FALSE	0.0438874	4.44801	0.78862	0.920482	FALSE	NA	NA	NA	NA
AKT1S1	0.41309	3.10322	0.0141303	0.119946	FALSE	0.124914	2.933	0.290305	0.630701	FALSE	0.271711	2.93866	0.0847495	0.435432	FALSE	0.374553	3.81263	0.0490414	0.233511	FALSE	0.175821	3.30413	0.108824	0.336103	FALSE	0.310958	3.00641	0.0536461	0.333364	FALSE	0.177522	3.0839	0.259862	0.535002	FALSE	NA	NA	NA	NA	NA	NA	NA	NA	NA	NA	NA	NA	NA	NA
AKT2	0.196957	3.48796	0.0760279	0.267059	FALSE	0.113481	3.87649	0.184925	0.525142	FALSE	0.150502	3.77385	0.258556	0.63063	FALSE	-0.0492565	3.35305	0.657225	0.841017	FALSE	-0.00166058	3.95276	0.98642	0.993216	FALSE	0.116464	3.75033	0.283441	0.622161	FALSE	0.188263	3.49722	0.171471	0.438048	FALSE	0.24913	3.75039	0.041615	0.249819	FALSE	NA	NA	NA	NA	NA	NA	NA	NA	NA
AKT3	-0.287814	6.77346	0.124157	0.341291	FALSE	-0.336672	7.88706	0.0241664	0.236188	FALSE	-0.403873	7.96447	0.0309625	0.301155	FALSE	-0.416176	8.11318	0.0277075	0.179655	FALSE	-0.188447	7.45678	0.121428	0.355563	FALSE	-0.398702	7.54385	0.00450321	0.128015	FALSE	-0.321063	6.7505	0.0396853	0.217211	FALSE	-0.353834	7.32836	0.0251202	0.193221	FALSE	-0.378879	7.39281	0.0427455	0.283706	FALSE	-0.100772	6.88368	0.575765	0.795175
AKTIP	0.314838	2.33734	0.0286717	0.166441	FALSE	0.0205977	2.38874	0.871153	0.955606	FALSE	0.195569	2.22328	0.2724	0.643327	FALSE	0.259789	1.98728	0.238873	0.520796	FALSE	NA	NA	NA	NA	NA	NA	NA	NA	NA	NA	-0.0195004	2.33041	0.913884	0.964934	FALSE	NA	NA	NA	NA	NA	NA	NA	NA	NA	NA	NA	NA	NA	NA
AL021155.5	NA	NA	NA	NA	NA	NA	NA	NA	NA	NA	NA	NA	NA	NA	NA	0.884248	3.32276	0.00856119	0.103384	FALSE	NA	NA	NA	NA	NA	NA	NA	NA	NA	NA	NA	NA	NA	NA	NA	NA	NA	NA	NA	NA	NA	NA	NA	NA	NA	NA	NA	NA	NA
AL021707.1	NA	NA	NA	NA	NA	-0.511235	2.48662	0.00393206	0.11479	FALSE	-0.481627	2.33141	0.0499789	0.348408	FALSE	-0.454845	2.5575	0.0120723	0.12301	FALSE	-0.184116	2.56785	0.329003	0.59083	FALSE	NA	NA	NA	NA	NA	NA	NA	NA	NA	NA	NA	NA	NA	NA	NA	NA	NA	NA	NA	NA	NA	NA	NA	NA
AL021918.5	NA	NA	NA	NA	NA	-0.239458	2.08865	0.157406	0.495645	FALSE	NA	NA	NA	NA	NA	NA	NA	NA	NA	NA	NA	NA	NA	NA	NA	NA	NA	NA	NA	NA	NA	NA	NA	NA	NA	NA	NA	NA	NA	NA	NA	NA	NA	NA	NA	NA	NA	NA	NA
AL022162.1	1.17129	1.48121	0.000151506	0.0148873	TRUE	NA	NA	NA	NA	NA	NA	NA	NA	NA	NA	NA	NA	NA	NA	NA	NA	NA	NA	NA	NA	NA	NA	NA	NA	NA	NA	NA	NA	NA	NA	NA	NA	NA	NA	NA	NA	NA	NA	NA	NA	NA	NA	NA	NA
AL022311.1	NA	NA	NA	NA	NA	-0.141264	2.7617	0.171247	0.50903	FALSE	-0.0810188	2.4178	0.554728	0.826656	FALSE	-0.185054	2.24666	0.267707	0.553532	FALSE	-0.122138	2.75209	0.479722	0.704118	FALSE	-0.275618	2.35612	0.099823	0.417681	FALSE	NA	NA	NA	NA	NA	NA	NA	NA	NA	NA	NA	NA	NA	NA	NA	NA	NA	NA	NA
AL022724.3	0.685168	2.29157	0.016651	0.130794	FALSE	0.386005	3.58351	0.078192	0.375638	FALSE	0.355199	3.21052	0.280814	0.650548	FALSE	0.249673	2.50891	0.202136	0.47712	FALSE	NA	NA	NA	NA	NA	0.336039	3.0722	0.164201	0.503028	FALSE	NA	NA	NA	NA	NA	NA	NA	NA	NA	NA	NA	NA	NA	NA	NA	NA	NA	NA	NA
AL024474.2	NA	NA	NA	NA	NA	0.121328	2.22987	0.486224	0.777589	FALSE	NA	NA	NA	NA	NA	NA	NA	NA	NA	NA	NA	NA	NA	NA	NA	NA	NA	NA	NA	NA	NA	NA	NA	NA	NA	NA	NA	NA	NA	NA	NA	NA	NA	NA	NA	NA	NA	NA	NA
AL031428.1	-0.450263	2.00689	0.0540305	0.225004	FALSE	-0.414675	3.42001	0.00147114	0.0837678	TRUE	-0.320271	3.34109	0.124422	0.489477	FALSE	-0.465785	3.54332	0.0202875	0.153493	FALSE	-0.082653	2.81709	0.620598	0.804337	FALSE	-0.328888	3.09921	0.141943	0.474038	FALSE	NA	NA	NA	NA	NA	NA	NA	NA	NA	NA	NA	NA	NA	NA	NA	NA	NA	NA	NA
AL031595.3	NA	NA	NA	NA	NA	0.0862576	1.9054	0.587369	0.833786	FALSE	NA	NA	NA	NA	NA	NA	NA	NA	NA	NA	NA	NA	NA	NA	NA	NA	NA	NA	NA	NA	NA	NA	NA	NA	NA	NA	NA	NA	NA	NA	NA	NA	NA	NA	NA	NA	NA	NA	NA
AL031599.1	NA	NA	NA	NA	NA	NA	NA	NA	NA	NA	NA	NA	NA	NA	NA	NA	NA	NA	NA	NA	NA	NA	NA	NA	NA	NA	NA	NA	NA	NA	NA	NA	NA	NA	NA	NA	NA	NA	NA	NA	NA	NA	NA	NA	NA	-1.42601	5.7456	0.00460934	0.107619
AL031602.2	NA	NA	NA	NA	NA	NA	NA	NA	NA	NA	-0.463218	2.99623	0.226438	0.59853	FALSE	NA	NA	NA	NA	NA	NA	NA	NA	NA	NA	NA	NA	NA	NA	NA	NA	NA	NA	NA	NA	NA	NA	NA	NA	NA	NA	NA	NA	NA	NA	NA	NA	NA	NA
AL031772.1	NA	NA	NA	NA	NA	-0.259492	2.26125	0.0732305	0.367575	FALSE	NA	NA	NA	NA	NA	-0.16511	2.79585	0.409766	0.677261	FALSE	NA	NA	NA	NA	NA	NA	NA	NA	NA	NA	NA	NA	NA	NA	NA	NA	NA	NA	NA	NA	NA	NA	NA	NA	NA	NA	NA	NA	NA
AL035071.2	NA	NA	NA	NA	NA	-0.326983	2.09251	0.0755253	0.371263	FALSE	NA	NA	NA	NA	NA	NA	NA	NA	NA	NA	NA	NA	NA	NA	NA	NA	NA	NA	NA	NA	NA	NA	NA	NA	NA	NA	NA	NA	NA	NA	NA	NA	NA	NA	NA	NA	NA	NA	NA
AL035446.1	0.397424	4.03464	0.113292	0.326807	FALSE	0.432198	3.76155	0.075816	0.372089	FALSE	0.256426	3.76305	0.371682	0.724658	FALSE	0.580263	3.93414	0.0178242	0.144345	FALSE	0.619443	2.80017	0.0175702	0.138517	FALSE	0.485717	4.00596	0.0296332	0.269697	FALSE	0.513718	3.90921	0.0204775	0.164251	FALSE	0.620563	3.72439	0.0145712	0.151782	FALSE	NA	NA	NA	NA	NA	NA	NA	NA	NA
AL035446.2	-0.592986	5.49222	0.0439365	0.206512	FALSE	-0.060665	7.17614	0.673115	0.877243	FALSE	-0.236494	6.53031	0.331392	0.694268	FALSE	-0.382207	6.18158	0.0215716	0.160071	FALSE	-0.0125226	5.51017	0.958198	0.980389	FALSE	-0.226317	6.54442	0.313036	0.64826	FALSE	-0.324843	5.33446	0.215006	0.485964	FALSE	-0.255268	6.17156	0.219488	0.526797	FALSE	0.00706705	6.22715	0.978969	0.994454	FALSE	NA	NA	NA	NA
AL035530.2	-0.232036	2.99176	0.108533	0.318448	FALSE	-0.100845	4.16663	0.423818	0.735363	FALSE	-0.0795499	3.53871	0.585579	0.841853	FALSE	0.0342651	3.68446	0.834968	0.93215	FALSE	-0.139544	3.34149	0.359115	0.614037	FALSE	-0.114244	3.68275	0.458069	0.74806	FALSE	-0.169731	2.92994	0.367053	0.628219	FALSE	-0.163151	3.67694	0.294844	0.602775	FALSE	NA	NA	NA	NA	NA	NA	NA	NA	NA
AL035587.1	NA	NA	NA	NA	NA	-0.183723	2.93725	0.151392	0.488506	FALSE	-0.188739	2.42125	0.175685	0.548733	FALSE	-0.298884	2.02773	0.124114	0.372838	FALSE	-0.174001	2.27857	0.29506	0.560416	FALSE	-0.302981	2.68402	0.0979473	0.416389	FALSE	NA	NA	NA	NA	NA	NA	NA	NA	NA	NA	NA	NA	NA	NA	NA	NA	NA	NA	NA
AL049828.1	-0.463346	2.38742	0.0612167	0.240094	FALSE	0.0689482	3.98847	0.733559	0.901918	FALSE	0.0017604	3.4232	0.994792	0.997781	FALSE	-0.444115	2.64468	0.0712663	0.28346	FALSE	-0.127999	3.33901	0.42092	0.660981	FALSE	-0.132638	3.35056	0.61433	0.836182	FALSE	NA	NA	NA	NA	NA	NA	NA	NA	NA	NA	NA	NA	NA	NA	NA	NA	NA	NA	NA
AL049840.4	NA	NA	NA	NA	NA	-0.0381572	1.81847	0.810384	0.932593	FALSE	NA	NA	NA	NA	NA	NA	NA	NA	NA	NA	NA	NA	NA	NA	NA	NA	NA	NA	NA	NA	NA	NA	NA	NA	NA	NA	NA	NA	NA	NA	NA	NA	NA	NA	NA	NA	NA	NA	NA
AL049840.5	0.0845612	2.19276	0.645116	0.811219	FALSE	0.15372	2.63417	0.364978	0.692366	FALSE	-0.0250809	2.50086	0.893984	0.968762	FALSE	NA	NA	NA	NA	NA	0.114965	2.99531	0.505862	0.724697	FALSE	NA	NA	NA	NA	NA	NA	NA	NA	NA	NA	NA	NA	NA	NA	NA	NA	NA	NA	NA	NA	NA	NA	NA	NA
AL049869.3	0.0399037	2.30858	0.843984	0.925473	FALSE	0.0386562	3.28792	0.779662	0.919598	FALSE	-0.0233828	2.93783	0.91294	0.975752	FALSE	-0.241497	3.32764	0.270795	0.556344	FALSE	0.0684107	3.1529	0.678057	0.839249	FALSE	0.000176768	3.12268	0.999319	0.999858	FALSE	NA	NA	NA	NA	NA	NA	NA	NA	NA	NA	NA	NA	NA	NA	NA	NA	NA	NA	NA
AL050309.1	-0.45188	3.1495	0.0234618	0.153469	FALSE	-0.172745	4.71789	0.203314	0.545037	FALSE	-0.302293	4.24726	0.115416	0.480521	FALSE	-0.350814	3.25105	0.125067	0.374608	FALSE	-0.358833	4.04698	0.0202394	0.145773	FALSE	-0.520864	3.97742	0.00581692	0.13825	FALSE	-0.559689	3.29057	0.00768342	0.10893	FALSE	-0.290041	4.14159	0.11355	0.39209	FALSE	NA	NA	NA	NA	NA	NA	NA	NA	NA
AL078459.1	-0.481428	2.37609	0.110846	0.323097	FALSE	-0.446893	3.25993	0.139392	0.471813	FALSE	-0.910827	3.08289	0.00374825	0.152353	FALSE	-0.00652151	4.13455	0.977007	0.989731	FALSE	-0.145076	3.64549	0.547728	0.755516	FALSE	0.0311823	3.04103	0.895097	0.965619	FALSE	NA	NA	NA	NA	NA	NA	NA	NA	NA	NA	NA	NA	NA	NA	NA	NA	NA	NA	NA
AL078590.2	NA	NA	NA	NA	NA	NA	NA	NA	NA	NA	NA	NA	NA	NA	NA	1.08313	3.3723	0.00514726	0.0806682	TRUE	NA	NA	NA	NA	NA	NA	NA	NA	NA	NA	NA	NA	NA	NA	NA	NA	NA	NA	NA	NA	NA	NA	NA	NA	NA	NA	NA	NA	NA
AL078600.1	NA	NA	NA	NA	NA	-0.0293348	3.09702	0.884602	0.959876	FALSE	-0.19791	2.78137	0.450393	0.770192	FALSE	NA	NA	NA	NA	NA	-0.550197	2.6999	0.0060039	0.0787277	TRUE	NA	NA	NA	NA	NA	NA	NA	NA	NA	NA	NA	NA	NA	NA	NA	NA	NA	NA	NA	NA	NA	NA	NA	NA
AL078604.4	-0.280402	5.14057	0.517152	0.723019	FALSE	-0.316586	6.33933	0.459612	0.758959	FALSE	-0.510208	6.17553	0.298878	0.666356	FALSE	0.254111	7.13721	0.4201	0.685488	FALSE	0.438672	6.48573	0.21357	0.477754	FALSE	0.135596	6.06744	0.701424	0.882698	FALSE	0.341138	5.00725	0.405909	0.661208	FALSE	0.270598	5.81745	0.491347	0.756445	FALSE	-0.178646	5.96154	0.698752	0.884923	FALSE	0.599545	6.19102	0.120899	0.426565
AL096803.2	NA	NA	NA	NA	NA	-0.151419	3.06815	0.281215	0.620639	FALSE	0.283784	2.58852	0.251038	0.62369	FALSE	-0.67502	2.85533	0.00374669	0.0713626	TRUE	-0.315209	3.06119	0.0665401	0.263911	FALSE	-0.320953	2.57364	0.213681	0.550958	FALSE	NA	NA	NA	NA	NA	NA	NA	NA	NA	NA	NA	NA	NA	NA	NA	NA	NA	NA	NA
AL096870.8	0.361204	3.24023	0.0275952	0.164912	FALSE	-0.0226496	3.09904	0.859029	0.952219	FALSE	0.0675939	3.09863	0.66318	0.87595	FALSE	0.0935087	2.91467	0.663718	0.844499	FALSE	-0.108244	2.79148	0.465821	0.694581	FALSE	0.0581495	3.09007	0.744031	0.904563	FALSE	0.110647	3.18507	0.537742	0.759284	FALSE	-0.0340502	3.20765	0.827021	0.937928	FALSE	NA	NA	NA	NA	NA	NA	NA	NA	NA
AL109824.1	NA	NA	NA	NA	NA	0.0539969	2.80222	0.677066	0.878772	FALSE	-0.311252	2.58604	0.0832569	0.433552	FALSE	-0.295808	2.6327	0.19524	0.47076	FALSE	-0.0924675	2.81077	0.575621	0.778006	FALSE	-0.247974	2.65115	0.208964	0.547161	FALSE	NA	NA	NA	NA	NA	NA	NA	NA	NA	NA	NA	NA	NA	NA	NA	NA	NA	NA	NA
AL110114.1	-0.180711	1.73373	0.354583	0.593111	FALSE	0.0250424	3.0198	0.881103	0.95848	FALSE	-0.130401	2.40689	0.539337	0.820105	FALSE	NA	NA	NA	NA	NA	-0.153763	2.32723	0.390562	0.638028	FALSE	NA	NA	NA	NA	NA	NA	NA	NA	NA	NA	NA	NA	NA	NA	NA	NA	NA	NA	NA	NA	NA	NA	NA	NA
AL117335.1	NA	NA	NA	NA	NA	0.13176	2.41405	0.488714	0.778575	FALSE	-0.0829842	2.47007	0.746005	0.913615	FALSE	0.189279	2.04878	0.390313	0.661531	FALSE	-0.0397236	2.48839	0.834129	0.926529	FALSE	NA	NA	NA	NA	NA	NA	NA	NA	NA	NA	NA	NA	NA	NA	NA	NA	NA	NA	NA	NA	NA	NA	NA	NA
AL117336.2	-0.414244	1.917	0.0748275	0.264513	FALSE	-0.314793	3.33719	0.0245923	0.23766	FALSE	-0.464759	2.80253	0.0407483	0.325519	FALSE	-0.184706	3.37947	0.342109	0.621316	FALSE	-0.30019	3.0778	0.0706702	0.272104	FALSE	-0.264965	3.07199	0.221232	0.559112	FALSE	NA	NA	NA	NA	NA	NA	NA	NA	NA	NA	NA	NA	NA	NA	NA	NA	NA	NA	NA
AL117381.1	0.096289	1.9791	0.721908	0.85634	FALSE	0.0474336	3.5408	0.77652	0.918657	FALSE	-0.00571536	3.07959	0.98194	0.994291	FALSE	0.12525	2.8648	0.571782	0.7887	FALSE	-0.0258302	3.04346	0.889465	0.950396	FALSE	0.0796696	2.95908	0.725496	0.895667	FALSE	NA	NA	NA	NA	NA	NA	NA	NA	NA	NA	NA	NA	NA	NA	NA	NA	NA	NA	NA
AL118506.1	NA	NA	NA	NA	NA	0.170259	1.95034	0.337973	0.672202	FALSE	0.0437939	1.93437	0.845957	0.952091	FALSE	NA	NA	NA	NA	NA	0.0091155	2.57549	0.959634	0.980941	FALSE	NA	NA	NA	NA	NA	NA	NA	NA	NA	NA	NA	NA	NA	NA	NA	NA	NA	NA	NA	NA	NA	NA	NA	NA
AL118516.1	0.597	1.97016	0.0827929	0.277675	FALSE	0.0165612	1.72978	0.953062	0.986597	FALSE	-0.0523966	1.94602	0.899237	0.970927	FALSE	0.763221	4.38186	0.0011268	0.0433561	TRUE	NA	NA	NA	NA	NA	NA	NA	NA	NA	NA	NA	NA	NA	NA	NA	NA	NA	NA	NA	NA	NA	NA	NA	NA	NA	NA	NA	NA	NA
AL121603.2	NA	NA	NA	NA	NA	NA	NA	NA	NA	NA	-0.358051	1.9611	0.0956772	0.45247	FALSE	NA	NA	NA	NA	NA	NA	NA	NA	NA	NA	NA	NA	NA	NA	NA	NA	NA	NA	NA	NA	NA	NA	NA	NA	NA	NA	NA	NA	NA	NA	NA	NA	NA	NA
AL121933.2	-0.142045	2.46829	0.537702	0.738934	FALSE	-0.163503	2.83216	0.387084	0.710134	FALSE	-0.718091	2.43065	0.0039443	0.153746	FALSE	0.0118664	3.01294	0.959477	0.984147	FALSE	0.0735277	2.2618	0.67406	0.837527	FALSE	-0.117659	2.58958	0.577039	0.816307	FALSE	NA	NA	NA	NA	NA	NA	NA	NA	NA	NA	NA	NA	NA	NA	NA	NA	NA	NA	NA
AL121944.1	0.551759	1.93968	0.0314477	0.173576	FALSE	0.397994	1.69658	0.0450831	0.301056	FALSE	0.245218	1.75938	0.359531	0.713018	FALSE	0.394022	2.21341	0.0534353	0.244347	FALSE	NA	NA	NA	NA	NA	NA	NA	NA	NA	NA	NA	NA	NA	NA	NA	NA	NA	NA	NA	NA	NA	NA	NA	NA	NA	NA	NA	NA	NA
AL121985.1	NA	NA	NA	NA	NA	-0.968426	2.53668	0.000492924	0.0549532	TRUE	-1.1036	2.20422	0.00238659	0.122891	FALSE	NA	NA	NA	NA	NA	NA	NA	NA	NA	NA	NA	NA	NA	NA	NA	NA	NA	NA	NA	NA	NA	NA	NA	NA	NA	NA	NA	NA	NA	NA	NA	NA	NA	NA
AL122035.1	NA	NA	NA	NA	NA	-0.074867	1.86491	0.575437	0.826223	FALSE	NA	NA	NA	NA	NA	NA	NA	NA	NA	NA	NA	NA	NA	NA	NA	NA	NA	NA	NA	NA	NA	NA	NA	NA	NA	NA	NA	NA	NA	NA	NA	NA	NA	NA	NA	NA	NA	NA	NA
AL132800.1	NA	NA	NA	NA	NA	0.218614	1.53664	0.303779	0.642774	FALSE	NA	NA	NA	NA	NA	NA	NA	NA	NA	NA	NA	NA	NA	NA	NA	NA	NA	NA	NA	NA	NA	NA	NA	NA	NA	NA	NA	NA	NA	NA	NA	NA	NA	NA	NA	NA	NA	NA	NA
AL133243.3	NA	NA	NA	NA	NA	-0.0072254	1.67369	0.960211	0.988872	FALSE	NA	NA	NA	NA	NA	NA	NA	NA	NA	NA	NA	NA	NA	NA	NA	NA	NA	NA	NA	NA	NA	NA	NA	NA	NA	NA	NA	NA	NA	NA	NA	NA	NA	NA	NA	NA	NA	NA	NA
AL133330.1	NA	NA	NA	NA	NA	-0.296917	2.79736	0.085539	0.387487	FALSE	-0.371256	3.07381	0.111699	0.474935	FALSE	-0.232425	2.63764	0.276756	0.561067	FALSE	-0.0976776	3.39228	0.528057	0.740884	FALSE	NA	NA	NA	NA	NA	NA	NA	NA	NA	NA	NA	NA	NA	NA	NA	NA	NA	NA	NA	NA	NA	NA	NA	NA
AL133415.1	NA	NA	NA	NA	NA	0.111584	2.48807	0.626576	0.854624	FALSE	0.118053	2.66008	0.69885	0.895065	FALSE	NA	NA	NA	NA	NA	0.458519	2.80466	0.0308602	0.177729	FALSE	NA	NA	NA	NA	NA	NA	NA	NA	NA	NA	NA	NA	NA	NA	NA	NA	NA	NA	NA	NA	NA	NA	NA	NA
AL133453.1	0.152244	3.35191	0.215356	0.457418	FALSE	0.113158	3.29764	0.380458	0.70455	FALSE	0.0968127	3.39278	0.531182	0.813983	FALSE	0.243562	2.86641	0.159175	0.423488	FALSE	0.145764	3.56333	0.317588	0.580735	FALSE	0.0683452	3.45921	0.680932	0.871228	FALSE	0.161554	3.42291	0.376804	0.636767	FALSE	0.242202	3.41624	0.085553	0.348059	FALSE	NA	NA	NA	NA	NA	NA	NA	NA	NA
AL135978.2	NA	NA	NA	NA	NA	-0.130687	2.47588	0.420295	0.732559	FALSE	-0.428291	2.02307	0.0585485	0.372061	FALSE	-0.0257181	2.63058	0.89143	0.956207	FALSE	NA	NA	NA	NA	NA	NA	NA	NA	NA	NA	NA	NA	NA	NA	NA	NA	NA	NA	NA	NA	NA	NA	NA	NA	NA	NA	NA	NA	NA
AL136038.5	0.527601	2.68932	0.0123545	0.111671	FALSE	0.155166	2.80046	0.348424	0.680158	FALSE	0.222353	2.72043	0.303421	0.669428	FALSE	0.223227	3.09719	0.197172	0.472665	FALSE	0.272426	2.61476	0.110856	0.337444	FALSE	0.228779	3.02009	0.216858	0.55402	FALSE	0.656822	2.62686	0.00345018	0.0723972	TRUE	NA	NA	NA	NA	NA	NA	NA	NA	NA	NA	NA	NA	NA	NA
AL136419.3	NA	NA	NA	NA	NA	-1.09074	1.70157	0.000446991	0.0532111	TRUE	NA	NA	NA	NA	NA	NA	NA	NA	NA	NA	NA	NA	NA	NA	NA	NA	NA	NA	NA	NA	NA	NA	NA	NA	NA	NA	NA	NA	NA	NA	NA	NA	NA	NA	NA	NA	NA	NA	NA
AL136962.1	NA	NA	NA	NA	NA	NA	NA	NA	NA	NA	NA	NA	NA	NA	NA	-0.834412	3.31599	0.0576846	0.254519	FALSE	NA	NA	NA	NA	NA	NA	NA	NA	NA	NA	NA	NA	NA	NA	NA	NA	NA	NA	NA	NA	NA	NA	NA	NA	NA	NA	NA	NA	NA
AL138720.1	NA	NA	NA	NA	NA	NA	NA	NA	NA	NA	NA	NA	NA	NA	NA	0.767024	3.34475	0.0298442	0.185744	FALSE	0.464463	3.1964	0.137608	0.377334	FALSE	NA	NA	NA	NA	NA	NA	NA	NA	NA	NA	NA	NA	NA	NA	NA	NA	NA	NA	NA	NA	NA	NA	NA	NA
AL138756.1	-0.137144	3.05521	0.497019	0.708444	FALSE	0.26037	3.86792	0.242588	0.58339	FALSE	0.115084	3.43266	0.63818	0.863484	FALSE	0.0189263	2.76493	0.921013	0.969193	FALSE	0.030411	2.23642	0.889025	0.950361	FALSE	0.0332536	3.13793	0.889902	0.963754	FALSE	0.0141959	3.10982	0.935497	0.975412	FALSE	NA	NA	NA	NA	NA	NA	NA	NA	NA	NA	NA	NA	NA	NA
AL138787.2	NA	NA	NA	NA	NA	0.311049	2.09768	0.0785388	0.376042	FALSE	NA	NA	NA	NA	NA	NA	NA	NA	NA	NA	NA	NA	NA	NA	NA	NA	NA	NA	NA	NA	NA	NA	NA	NA	NA	NA	NA	NA	NA	NA	NA	NA	NA	NA	NA	NA	NA	NA	NA
AL138828.1	-0.192478	2.9495	0.634034	0.804607	FALSE	-0.838458	3.57669	0.0264694	0.243793	FALSE	-0.673357	3.09407	0.123215	0.488968	FALSE	0.12991	5.75979	0.742042	0.889537	FALSE	NA	NA	NA	NA	NA	NA	NA	NA	NA	NA	NA	NA	NA	NA	NA	NA	NA	NA	NA	NA	NA	NA	NA	NA	NA	NA	NA	NA	NA
AL139260.1	-0.461207	4.29091	0.00160201	0.0469587	TRUE	-0.2448	5.31052	0.0281653	0.251304	FALSE	-0.440515	5.00131	0.010415	0.211343	FALSE	-0.396086	5.12213	0.00446775	0.077075	TRUE	-0.10595	5.1438	0.384224	0.632858	FALSE	-0.351564	5.00567	0.0546509	0.334059	FALSE	-0.324933	4.15119	0.0232882	0.172116	FALSE	-0.367948	4.82699	0.016101	0.159118	FALSE	-0.184911	5.36966	0.267785	0.602633	FALSE	-0.364839	5.69569	0.189224	0.507259
AL139294.1	-0.57202	1.8856	0.0350636	0.182936	FALSE	-0.247684	3.40232	0.188903	0.53026	FALSE	-0.773118	2.70624	0.00296619	0.137393	FALSE	-0.525386	3.10131	0.0348737	0.198392	FALSE	-0.125014	2.64504	0.618339	0.803479	FALSE	-0.479008	3.23271	0.0407273	0.301214	FALSE	NA	NA	NA	NA	NA	NA	NA	NA	NA	NA	NA	NA	NA	NA	NA	NA	NA	NA	NA
AL139384.1	-0.64907	1.44187	0.0235178	0.153648	FALSE	-0.59858	1.4369	0.012903	0.181723	FALSE	-0.156697	1.51385	0.590984	0.843564	FALSE	NA	NA	NA	NA	NA	NA	NA	NA	NA	NA	NA	NA	NA	NA	NA	NA	NA	NA	NA	NA	NA	NA	NA	NA	NA	NA	NA	NA	NA	NA	NA	NA	NA	NA
AL157388.1	-0.460093	2.11341	0.226922	0.470379	FALSE	-0.246316	2.37939	0.460769	0.75927	FALSE	-0.450175	2.04214	0.184876	0.554094	FALSE	0.438675	2.75858	0.144546	0.40295	FALSE	NA	NA	NA	NA	NA	NA	NA	NA	NA	NA	NA	NA	NA	NA	NA	NA	NA	NA	NA	NA	NA	NA	NA	NA	NA	NA	NA	NA	NA
AL157392.2	NA	NA	NA	NA	NA	0.104927	2.43706	0.68899	0.88336	FALSE	0.269658	2.13083	0.451847	0.770859	FALSE	NA	NA	NA	NA	NA	NA	NA	NA	NA	NA	NA	NA	NA	NA	NA	NA	NA	NA	NA	NA	NA	NA	NA	NA	NA	NA	NA	NA	NA	NA	NA	NA	NA	NA
AL157392.3	-0.16425	2.13261	0.354174	0.592904	FALSE	-0.0856559	3.33831	0.413457	0.729131	FALSE	-0.033415	2.87231	0.848249	0.952398	FALSE	-0.431256	2.44559	0.0286296	0.182316	FALSE	-0.369693	2.75452	0.0162121	0.135058	FALSE	-0.338711	2.8405	0.0579737	0.341367	FALSE	NA	NA	NA	NA	NA	NA	NA	NA	NA	NA	NA	NA	NA	NA	NA	NA	NA	NA	NA
AL157402.2	NA	NA	NA	NA	NA	-0.249265	2.20725	0.126357	0.454646	FALSE	NA	NA	NA	NA	NA	NA	NA	NA	NA	NA	NA	NA	NA	NA	NA	NA	NA	NA	NA	NA	NA	NA	NA	NA	NA	NA	NA	NA	NA	NA	NA	NA	NA	NA	NA	NA	NA	NA	NA
AL157786.1	-0.0981976	1.99203	0.678828	0.831839	FALSE	0.225305	3.56456	0.189488	0.531034	FALSE	-0.132528	3.63012	0.540766	0.821802	FALSE	-0.0248744	3.6503	0.913605	0.966464	FALSE	0.407199	3.89907	0.0481879	0.221531	FALSE	0.07399	3.26037	0.729864	0.897736	FALSE	NA	NA	NA	NA	NA	NA	NA	NA	NA	NA	NA	NA	NA	NA	NA	NA	NA	NA	NA
AL157871.4	-0.5523	2.44311	0.18118	0.417643	FALSE	-0.272845	3.82089	0.470977	0.76604	FALSE	-0.311526	3.53095	0.505571	0.79983	FALSE	-0.858309	2.85853	0.0246056	0.171512	FALSE	-0.54844	3.50394	0.146	0.389468	FALSE	-0.618414	3.21169	0.080284	0.383292	FALSE	NA	NA	NA	NA	NA	-0.609551	4.29171	0.0498393	0.274312	FALSE	NA	NA	NA	NA	NA	NA	NA	NA	NA
AL157938.2	NA	NA	NA	NA	NA	0.0557583	2.86666	0.680951	0.879994	FALSE	-0.103021	2.64141	0.605178	0.849029	FALSE	NA	NA	NA	NA	NA	0.23177	2.99328	0.182508	0.436224	FALSE	-0.137551	2.66447	0.514404	0.783913	FALSE	NA	NA	NA	NA	NA	NA	NA	NA	NA	NA	NA	NA	NA	NA	NA	NA	NA	NA	NA
AL158152.1	-0.19243	3.24455	0.168013	0.402613	FALSE	-0.0622004	4.58127	0.592295	0.836791	FALSE	-0.25229	3.81917	0.108603	0.471189	FALSE	0.0415716	4.66545	0.794447	0.915899	FALSE	-0.0168719	4.00091	0.873628	0.942679	FALSE	-0.133937	3.96053	0.388075	0.700144	FALSE	0.00315176	3.07578	0.985611	0.995315	FALSE	-0.311656	3.61701	0.0599836	0.297494	FALSE	NA	NA	NA	NA	NA	NA	NA	NA	NA
AL160272.1	NA	NA	NA	NA	NA	0.325507	2.29773	0.242894	0.58386	FALSE	NA	NA	NA	NA	NA	0.44463	2.59258	0.243807	0.526792	FALSE	NA	NA	NA	NA	NA	NA	NA	NA	NA	NA	NA	NA	NA	NA	NA	NA	NA	NA	NA	NA	NA	NA	NA	NA	NA	NA	NA	NA	NA
AL161740.1	NA	NA	NA	NA	NA	0.658179	1.56988	0.266805	0.606771	FALSE	NA	NA	NA	NA	NA	NA	NA	NA	NA	NA	NA	NA	NA	NA	NA	NA	NA	NA	NA	NA	NA	NA	NA	NA	NA	NA	NA	NA	NA	NA	NA	NA	NA	NA	NA	NA	NA	NA	NA
AL162253.2	-0.519596	2.79369	0.00392187	0.0694192	TRUE	-0.482415	3.88258	0.000454522	0.0532111	TRUE	-0.448573	3.48791	0.0086271	0.194586	FALSE	-0.0244116	3.30138	0.904136	0.962034	FALSE	-0.544128	3.43072	0.00590691	0.078013	TRUE	-0.574123	3.3932	0.00358363	0.120207	FALSE	-0.554743	2.72748	0.00417327	0.0799709	TRUE	-0.682844	3.4794	0.00029003	0.0252163	TRUE	NA	NA	NA	NA	NA	NA	NA	NA	NA
AL162431.1	NA	NA	NA	NA	NA	-0.240419	1.42076	0.354866	0.684431	FALSE	NA	NA	NA	NA	NA	NA	NA	NA	NA	NA	NA	NA	NA	NA	NA	NA	NA	NA	NA	NA	NA	NA	NA	NA	NA	NA	NA	NA	NA	NA	NA	NA	NA	NA	NA	NA	NA	NA	NA
AL163541.1	-1.39072	2.63971	0.0221147	0.149989	FALSE	-1.75368	4.37179	0.00513425	0.125211	FALSE	-2.07047	3.6944	0.00423304	0.155642	FALSE	-0.737829	4.37728	0.122404	0.371018	FALSE	-1.88692	3.93701	0.00160933	0.0409655	TRUE	-1.76343	3.22838	0.00273023	0.110828	FALSE	NA	NA	NA	NA	NA	NA	NA	NA	NA	NA	NA	NA	NA	NA	NA	NA	NA	NA	NA
AL353807.5	NA	NA	NA	NA	NA	0.197458	1.94872	0.463648	0.761082	FALSE	NA	NA	NA	NA	NA	NA	NA	NA	NA	NA	NA	NA	NA	NA	NA	NA	NA	NA	NA	NA	NA	NA	NA	NA	NA	NA	NA	NA	NA	NA	NA	NA	NA	NA	NA	NA	NA	NA	NA
AL354733.3	NA	NA	NA	NA	NA	0.111991	2.31054	0.615669	0.851024	FALSE	-0.0350574	2.00069	0.911432	0.974962	FALSE	0.0647291	2.37911	0.818904	0.927969	FALSE	NA	NA	NA	NA	NA	NA	NA	NA	NA	NA	NA	NA	NA	NA	NA	NA	NA	NA	NA	NA	NA	NA	NA	NA	NA	NA	NA	NA	NA
AL354740.1	-0.113234	2.39127	0.425812	0.653974	FALSE	-0.294839	3.13981	0.00655887	0.135907	FALSE	-0.23252	2.99239	0.104422	0.466222	FALSE	0.0589941	3.42228	0.784701	0.911866	FALSE	-0.034828	3.34002	0.782711	0.902469	FALSE	-0.120778	3.18484	0.561709	0.808966	FALSE	NA	NA	NA	NA	NA	NA	NA	NA	NA	NA	NA	NA	NA	NA	NA	NA	NA	NA	NA
AL354822.1	NA	NA	NA	NA	NA	-0.372408	1.7801	0.182249	0.522241	FALSE	NA	NA	NA	NA	NA	NA	NA	NA	NA	NA	NA	NA	NA	NA	NA	NA	NA	NA	NA	NA	NA	NA	NA	NA	NA	NA	NA	NA	NA	NA	NA	NA	NA	NA	NA	NA	NA	NA	NA
AL355075.4	NA	NA	NA	NA	NA	NA	NA	NA	NA	NA	NA	NA	NA	NA	NA	0.631963	2.80835	0.104806	0.341693	FALSE	NA	NA	NA	NA	NA	NA	NA	NA	NA	NA	NA	NA	NA	NA	NA	NA	NA	NA	NA	NA	NA	NA	NA	NA	NA	NA	NA	NA	NA
AL355303.1	NA	NA	NA	NA	NA	0.0544514	1.64671	0.866208	0.953675	FALSE	NA	NA	NA	NA	NA	NA	NA	NA	NA	NA	NA	NA	NA	NA	NA	NA	NA	NA	NA	NA	NA	NA	NA	NA	NA	NA	NA	NA	NA	NA	NA	NA	NA	NA	NA	NA	NA	NA	NA
AL355512.1	NA	NA	NA	NA	NA	0.429908	2.02295	0.0794126	0.377689	FALSE	NA	NA	NA	NA	NA	0.634483	3.21227	0.000813341	0.0366915	TRUE	0.705746	3.13559	0.00070652	0.0266593	TRUE	NA	NA	NA	NA	NA	NA	NA	NA	NA	NA	NA	NA	NA	NA	NA	NA	NA	NA	NA	NA	NA	NA	NA	NA
AL355574.1	NA	NA	NA	NA	NA	-0.118899	2.86256	0.28184	0.621222	FALSE	-0.179518	2.65042	0.310334	0.677142	FALSE	-0.286688	2.54881	0.0631426	0.265683	FALSE	-0.0241959	2.70186	0.887897	0.949996	FALSE	-0.204283	2.65289	0.301418	0.637331	FALSE	NA	NA	NA	NA	NA	NA	NA	NA	NA	NA	NA	NA	NA	NA	NA	NA	NA	NA	NA
AL356124.1	-0.852963	3.45678	0.00236082	0.0534226	TRUE	-0.52721	5.3193	0.00888023	0.154181	FALSE	-0.511825	4.38024	0.0741223	0.408765	FALSE	-0.238604	4.67824	0.066017	0.272132	FALSE	-0.581813	4.96413	0.00219637	0.047669	TRUE	-0.359981	4.28422	0.168173	0.506008	FALSE	-0.714346	3.5824	0.0164559	0.15024	FALSE	-0.503395	4.03668	0.0520497	0.280453	FALSE	NA	NA	NA	NA	NA	NA	NA	NA	NA
AL356417.3	-0.176389	2.87773	0.742922	0.867325	FALSE	-0.025583	3.77763	0.966273	0.990592	FALSE	0.117466	3.311	0.843087	0.950818	FALSE	-0.102037	2.6265	0.794009	0.915704	FALSE	-0.0420808	2.86001	0.933634	0.970866	FALSE	NA	NA	NA	NA	NA	NA	NA	NA	NA	NA	NA	NA	NA	NA	NA	NA	NA	NA	NA	NA	NA	NA	NA	NA
AL356599.1	NA	NA	NA	NA	NA	0.021973	3.12155	0.885404	0.960274	FALSE	-0.400747	2.76931	0.058796	0.372061	FALSE	-0.17351	3.10615	0.363917	0.640463	FALSE	-0.055949	2.86633	0.749825	0.883953	FALSE	-0.36742	2.81816	0.0748605	0.371026	FALSE	NA	NA	NA	NA	NA	NA	NA	NA	NA	NA	NA	NA	NA	NA	NA	NA	NA	NA	NA
AL357153.2	NA	NA	NA	NA	NA	0.1861	2.81179	0.569476	0.822595	FALSE	-0.0642391	2.07694	0.876837	0.96374	FALSE	-0.514355	2.66828	0.0397815	0.210324	FALSE	NA	NA	NA	NA	NA	NA	NA	NA	NA	NA	NA	NA	NA	NA	NA	NA	NA	NA	NA	NA	NA	NA	NA	NA	NA	NA	NA	NA	NA
AL359644.1	NA	NA	NA	NA	NA	0.393001	2.20262	0.0487374	0.313741	FALSE	NA	NA	NA	NA	NA	NA	NA	NA	NA	NA	NA	NA	NA	NA	NA	NA	NA	NA	NA	NA	NA	NA	NA	NA	NA	NA	NA	NA	NA	NA	NA	NA	NA	NA	NA	NA	NA	NA	NA
AL359762.1	-0.628429	2.21008	0.00116173	0.0400367	TRUE	-0.392672	3.05885	0.00908905	0.155512	FALSE	-0.579287	2.49063	0.0019754	0.113211	FALSE	-0.398333	3.05022	0.0487107	0.232817	FALSE	-0.00587276	3.09457	0.974269	0.988009	FALSE	-0.322697	2.66913	0.0949486	0.411848	FALSE	NA	NA	NA	NA	NA	NA	NA	NA	NA	NA	NA	NA	NA	NA	NA	NA	NA	NA	NA
AL360091.3	NA	NA	NA	NA	NA	0.167018	2.90502	0.322891	0.657769	FALSE	-0.0772935	2.50571	0.644052	0.865907	FALSE	0.103269	2.51596	0.714519	0.874156	FALSE	0.313864	3.25389	0.0156906	0.131972	FALSE	0.279605	2.68278	0.256468	0.596712	FALSE	NA	NA	NA	NA	NA	NA	NA	NA	NA	NA	NA	NA	NA	NA	NA	NA	NA	NA	NA
AL365295.1	-1.06334	5.4928	0.000270166	0.0196637	TRUE	-0.757342	7.0915	0.00336859	0.106181	FALSE	-0.878306	6.13806	0.000918528	0.0922859	TRUE	-0.693757	5.91933	0.0223371	0.162749	FALSE	-1.10159	4.3582	0.000168376	0.0128606	TRUE	-1.17835	5.86827	0.000179329	0.0399866	TRUE	-1.00637	5.20074	0.000120946	0.0159084	TRUE	-0.999745	6.07492	1.31248e-05	0.00601793	TRUE	-1.06346	5.16065	0.00475734	0.121134	FALSE	NA	NA	NA	NA
AL365361.1	0.246332	3.79063	0.395051	0.626798	FALSE	0.114093	4.35069	0.66102	0.872624	FALSE	0.240491	4.56967	0.346843	0.703911	FALSE	-0.0646072	3.38204	0.79207	0.914999	FALSE	NA	NA	NA	NA	NA	-0.375849	3.45408	0.288081	0.626863	FALSE	-0.0328151	3.84884	0.886371	0.954454	FALSE	0.120997	3.8868	0.686862	0.866776	FALSE	NA	NA	NA	NA	NA	NA	NA	NA	NA
AL365434.2	NA	NA	NA	NA	NA	NA	NA	NA	NA	NA	NA	NA	NA	NA	NA	NA	NA	NA	NA	NA	1.09926	2.71259	0.00207523	0.0468132	TRUE	NA	NA	NA	NA	NA	NA	NA	NA	NA	NA	NA	NA	NA	NA	NA	NA	NA	NA	NA	NA	NA	NA	NA	NA
AL390066.1	NA	NA	NA	NA	NA	-0.0614553	2.34594	0.711483	0.891648	FALSE	0.0488646	2.16535	0.835831	0.948716	FALSE	NA	NA	NA	NA	NA	0.121945	2.60399	0.452459	0.684738	FALSE	NA	NA	NA	NA	NA	NA	NA	NA	NA	NA	NA	NA	NA	NA	NA	NA	NA	NA	NA	NA	NA	NA	NA	NA
AL390728.6	NA	NA	NA	NA	NA	0.0303315	2.31554	0.848909	0.948597	FALSE	0.119431	2.01324	0.576289	0.837158	FALSE	NA	NA	NA	NA	NA	NA	NA	NA	NA	NA	NA	NA	NA	NA	NA	NA	NA	NA	NA	NA	NA	NA	NA	NA	NA	NA	NA	NA	NA	NA	NA	NA	NA	NA
AL392086.3	NA	NA	NA	NA	NA	-0.307964	2.86858	0.444345	0.749465	FALSE	-0.379661	2.95914	0.410106	0.745287	FALSE	0.372749	3.69009	0.250626	0.534115	FALSE	NA	NA	NA	NA	NA	NA	NA	NA	NA	NA	NA	NA	NA	NA	NA	NA	NA	NA	NA	NA	NA	NA	NA	NA	NA	NA	NA	NA	NA
AL392172.1	0.277194	5.20919	0.111165	0.323641	FALSE	0.0183579	5.86397	0.892867	0.963181	FALSE	0.00416112	5.3918	0.983145	0.994522	FALSE	0.241129	5.86021	0.0732739	0.287555	FALSE	0.0836822	5.14785	0.570012	0.773136	FALSE	0.16348	5.57714	0.328553	0.661984	FALSE	0.0774145	5.13117	0.608077	0.805748	FALSE	0.142213	5.24689	0.391735	0.680575	FALSE	0.269776	6.21347	0.0484944	0.299463	FALSE	NA	NA	NA	NA
AL441992.1	0.352365	1.93142	0.158261	0.390317	FALSE	0.274302	1.58296	0.245313	0.586612	FALSE	-0.0415588	1.67058	0.884587	0.966307	FALSE	NA	NA	NA	NA	NA	NA	NA	NA	NA	NA	NA	NA	NA	NA	NA	NA	NA	NA	NA	NA	NA	NA	NA	NA	NA	NA	NA	NA	NA	NA	NA	NA	NA	NA
AL445524.1	0.65356	3.02774	0.000450412	0.0265685	TRUE	0.541839	2.62969	0.000837731	0.0691167	TRUE	0.472011	2.91261	0.0231633	0.275057	FALSE	0.904067	3.17438	4.05909e-06	0.00230509	TRUE	0.619487	3.04438	0.00222987	0.0477909	TRUE	0.672784	2.97744	0.00861013	0.159574	FALSE	0.591086	3.08644	0.000319913	0.0247196	TRUE	NA	NA	NA	NA	NA	NA	NA	NA	NA	NA	NA	NA	NA	NA
AL450326.1	-0.62629	1.10093	0.0104543	0.104007	FALSE	NA	NA	NA	NA	NA	NA	NA	NA	NA	NA	NA	NA	NA	NA	NA	NA	NA	NA	NA	NA	NA	NA	NA	NA	NA	NA	NA	NA	NA	NA	NA	NA	NA	NA	NA	NA	NA	NA	NA	NA	NA	NA	NA	NA
AL450992.1	NA	NA	NA	NA	NA	NA	NA	NA	NA	NA	NA	NA	NA	NA	NA	0.265868	2.55444	0.214673	0.493794	FALSE	NA	NA	NA	NA	NA	NA	NA	NA	NA	NA	NA	NA	NA	NA	NA	NA	NA	NA	NA	NA	NA	NA	NA	NA	NA	NA	NA	NA	NA
AL450998.2	-0.289054	1.84472	0.0512327	0.220193	FALSE	-0.23249	2.44702	0.115626	0.439515	FALSE	-0.253068	2.4304	0.10969	0.472569	FALSE	-0.17549	2.94577	0.469623	0.718763	FALSE	-0.029041	2.73384	0.852084	0.933475	FALSE	NA	NA	NA	NA	NA	NA	NA	NA	NA	NA	NA	NA	NA	NA	NA	NA	NA	NA	NA	NA	NA	NA	NA	NA
AL451123.1	0.255416	1.74574	0.291372	0.536788	FALSE	-0.237099	2.29371	0.201731	0.543233	FALSE	-0.243434	1.94461	0.499491	0.796134	FALSE	0.771096	3.44919	0.00122035	0.0443793	TRUE	NA	NA	NA	NA	NA	NA	NA	NA	NA	NA	NA	NA	NA	NA	NA	NA	NA	NA	NA	NA	NA	NA	NA	NA	NA	NA	NA	NA	NA
AL451165.2	0.4277	2.22364	0.0450043	0.2082	FALSE	0.0593356	1.92319	0.73564	0.903118	FALSE	0.0897894	1.96867	0.702109	0.89613	FALSE	0.465214	2.58954	0.0143905	0.130815	FALSE	NA	NA	NA	NA	NA	NA	NA	NA	NA	NA	NA	NA	NA	NA	NA	NA	NA	NA	NA	NA	NA	NA	NA	NA	NA	NA	NA	NA	NA
AL512353.1	NA	NA	NA	NA	NA	NA	NA	NA	NA	NA	NA	NA	NA	NA	NA	NA	NA	NA	NA	NA	0.189851	2.52463	0.375935	0.627123	FALSE	NA	NA	NA	NA	NA	NA	NA	NA	NA	NA	NA	NA	NA	NA	NA	NA	NA	NA	NA	NA	NA	NA	NA	NA
AL512603.2	-0.473861	1.44757	0.0845937	0.281392	FALSE	-0.378675	2.78711	0.16271	0.500642	FALSE	-0.213603	2.37458	0.525146	0.810889	FALSE	-0.354086	3.4176	0.120277	0.367919	FALSE	NA	NA	NA	NA	NA	NA	NA	NA	NA	NA	NA	NA	NA	NA	NA	NA	NA	NA	NA	NA	NA	NA	NA	NA	NA	NA	NA	NA	NA
AL512625.3	-0.56962	2.95475	0.00717979	0.0867472	TRUE	-0.372575	3.28972	0.051191	0.317649	FALSE	-0.215034	3.19543	0.3182	0.683612	FALSE	-0.282412	2.62522	0.113166	0.355286	FALSE	-0.425812	2.97593	0.0308419	0.177729	FALSE	-0.513987	3.09277	0.0441791	0.313942	FALSE	-0.267262	3.06784	0.163545	0.427314	FALSE	-0.329952	3.28627	0.146308	0.437664	FALSE	NA	NA	NA	NA	NA	NA	NA	NA	NA
AL513327.1	NA	NA	NA	NA	NA	0.0512889	2.46847	0.771016	0.917419	FALSE	-0.21156	2.24155	0.42419	0.753812	FALSE	0.229632	2.84251	0.313393	0.595336	FALSE	0.144751	3.10801	0.5131	0.729469	FALSE	NA	NA	NA	NA	NA	NA	NA	NA	NA	NA	NA	NA	NA	NA	NA	NA	NA	NA	NA	NA	NA	NA	NA	NA
AL513550.1	NA	NA	NA	NA	NA	-0.0559344	1.97553	0.665029	0.875056	FALSE	0.0274666	1.57567	0.87843	0.964267	FALSE	NA	NA	NA	NA	NA	NA	NA	NA	NA	NA	NA	NA	NA	NA	NA	NA	NA	NA	NA	NA	NA	NA	NA	NA	NA	NA	NA	NA	NA	NA	NA	NA	NA	NA
AL589935.1	-1.08216	3.39185	4.37758e-05	0.00769508	TRUE	-0.655772	4.95032	6.43576e-05	0.0252449	TRUE	-0.704108	4.65812	0.00382928	0.153746	FALSE	-0.632265	4.39265	0.0005702	0.0316363	TRUE	-0.214975	2.84203	0.353184	0.610552	FALSE	-0.741427	4.39799	0.00152331	0.0895821	TRUE	-0.807265	3.18575	0.00106953	0.0410026	TRUE	-0.61422	3.85432	0.00677574	0.106135	FALSE	NA	NA	NA	NA	NA	NA	NA	NA	NA
AL590764.1	-0.153654	1.88699	0.277761	0.52358	FALSE	-0.151047	2.72691	0.259702	0.601467	FALSE	0.13643	2.04965	0.487331	0.789808	FALSE	NA	NA	NA	NA	NA	NA	NA	NA	NA	NA	NA	NA	NA	NA	NA	NA	NA	NA	NA	NA	NA	NA	NA	NA	NA	NA	NA	NA	NA	NA	NA	NA	NA	NA
AL591043.2	NA	NA	NA	NA	NA	NA	NA	NA	NA	NA	NA	NA	NA	NA	NA	0.191967	2.6295	0.42386	0.688185	FALSE	NA	NA	NA	NA	NA	NA	NA	NA	NA	NA	NA	NA	NA	NA	NA	NA	NA	NA	NA	NA	NA	NA	NA	NA	NA	NA	NA	NA	NA
AL591895.1	-0.279345	2.63116	0.0847292	0.281747	FALSE	-0.0986834	3.48059	0.477092	0.770602	FALSE	-0.232294	3.01541	0.196528	0.566126	FALSE	0.0543268	2.80404	0.79856	0.918196	FALSE	-0.319136	2.41312	0.189222	0.444941	FALSE	-0.217671	3.10963	0.213816	0.550958	FALSE	-0.0401955	2.4449	0.820156	0.924491	FALSE	NA	NA	NA	NA	NA	NA	NA	NA	NA	NA	NA	NA	NA	NA
AL592183.1	-0.16259	2.61352	0.853293	0.92948	FALSE	0.773087	3.75495	0.382196	0.705836	FALSE	0.847091	3.35809	0.394295	0.735523	FALSE	0.0929961	2.98691	0.877737	0.950447	FALSE	0.609693	3.97095	0.408939	0.65189	FALSE	-0.0973104	3.44642	0.885425	0.962352	FALSE	0.320964	2.7884	0.626839	0.818421	FALSE	0.449153	3.40658	0.463402	0.73343	FALSE	NA	NA	NA	NA	NA	NA	NA	NA	NA
AL592429.2	NA	NA	NA	NA	NA	0.284936	1.79173	0.285103	0.625199	FALSE	NA	NA	NA	NA	NA	0.45496	2.88612	0.162591	0.428854	FALSE	NA	NA	NA	NA	NA	NA	NA	NA	NA	NA	NA	NA	NA	NA	NA	NA	NA	NA	NA	NA	NA	NA	NA	NA	NA	NA	NA	NA	NA
AL603839.3	-0.225259	1.91876	0.251012	0.494271	FALSE	0.0893679	2.8005	0.529442	0.80041	FALSE	0.173754	2.51139	0.451408	0.770859	FALSE	NA	NA	NA	NA	NA	-0.0890895	2.36773	0.641311	0.818721	FALSE	NA	NA	NA	NA	NA	NA	NA	NA	NA	NA	NA	NA	NA	NA	NA	NA	NA	NA	NA	NA	NA	NA	NA	NA
AL606489.1	-0.223639	1.6552	0.252558	0.495928	FALSE	-0.107136	2.65064	0.50717	0.788409	FALSE	-0.460433	2.74764	0.0349831	0.310504	FALSE	-0.163667	3.85293	0.343015	0.622456	FALSE	0.161822	3.24787	0.309792	0.573307	FALSE	NA	NA	NA	NA	NA	NA	NA	NA	NA	NA	NA	NA	NA	NA	NA	NA	NA	NA	NA	NA	NA	NA	NA	NA
AL627171.2	0.28039	5.39239	0.123407	0.339612	FALSE	0.419466	5.85816	0.0611951	0.340301	FALSE	0.214682	5.78814	0.398779	0.738447	FALSE	0.563866	6.97036	0.025783	0.174083	FALSE	0.330327	6.13426	0.0554336	0.240046	FALSE	0.490006	5.92448	0.02112	0.23517	FALSE	0.486859	5.16606	0.0163699	0.149984	FALSE	0.549839	5.71693	0.0110835	0.13208	FALSE	0.216231	6.61342	0.32759	0.644781	FALSE	0.758415	6.61033	0.00156011	0.0801392
AL645465.1	NA	NA	NA	NA	NA	-0.173432	2.91918	0.18072	0.520251	FALSE	-0.245732	2.45903	0.172367	0.547087	FALSE	-0.290722	3.24974	0.194965	0.47053	FALSE	0.22861	3.4645	0.246439	0.51396	FALSE	-0.298624	2.46728	0.191755	0.530918	FALSE	NA	NA	NA	NA	NA	NA	NA	NA	NA	NA	NA	NA	NA	NA	NA	NA	NA	NA	NA
AL645568.1	-0.284398	1.50536	0.216364	0.457941	FALSE	-0.0481706	2.80768	0.722246	0.896859	FALSE	0.0778215	2.30475	0.70797	0.89931	FALSE	NA	NA	NA	NA	NA	NA	NA	NA	NA	NA	NA	NA	NA	NA	NA	NA	NA	NA	NA	NA	NA	NA	NA	NA	NA	NA	NA	NA	NA	NA	NA	NA	NA	NA
AL683813.1	NA	NA	NA	NA	NA	-0.115421	2.03501	0.485596	0.776901	FALSE	NA	NA	NA	NA	NA	NA	NA	NA	NA	NA	NA	NA	NA	NA	NA	NA	NA	NA	NA	NA	NA	NA	NA	NA	NA	NA	NA	NA	NA	NA	NA	NA	NA	NA	NA	NA	NA	NA	NA
AL691447.2	NA	NA	NA	NA	NA	0.0659742	1.94216	0.809691	0.932466	FALSE	NA	NA	NA	NA	NA	NA	NA	NA	NA	NA	NA	NA	NA	NA	NA	NA	NA	NA	NA	NA	NA	NA	NA	NA	NA	NA	NA	NA	NA	NA	NA	NA	NA	NA	NA	NA	NA	NA	NA
AL731577.2	-0.428098	2.49592	0.0398937	0.196606	FALSE	-0.246004	4.21524	0.0248358	0.238906	FALSE	-0.27305	3.63767	0.0904569	0.444465	FALSE	-0.417667	4.1633	0.0163798	0.139311	FALSE	-0.169997	3.82361	0.120187	0.353651	FALSE	-0.119049	3.63509	0.527041	0.791125	FALSE	NA	NA	NA	NA	NA	-0.278774	3.23804	0.104462	0.380948	FALSE	NA	NA	NA	NA	NA	NA	NA	NA	NA
AL732509.1	NA	NA	NA	NA	NA	-0.301598	2.45022	0.047755	0.31029	FALSE	0.0296209	2.10981	0.872582	0.962157	FALSE	NA	NA	NA	NA	NA	-0.271602	2.24733	0.0622127	0.254079	FALSE	NA	NA	NA	NA	NA	NA	NA	NA	NA	NA	NA	NA	NA	NA	NA	NA	NA	NA	NA	NA	NA	NA	NA	NA
ALAD	-0.0592664	2.15982	0.736916	0.863932	FALSE	-0.351501	2.48046	0.00684983	0.138493	FALSE	-0.0432332	2.16551	0.784772	0.933386	FALSE	0.191452	2.19296	0.381407	0.653783	FALSE	NA	NA	NA	NA	NA	NA	NA	NA	NA	NA	NA	NA	NA	NA	NA	NA	NA	NA	NA	NA	NA	NA	NA	NA	NA	NA	NA	NA	NA
ALAS1	-0.191836	7.32919	0.240957	0.484247	FALSE	-0.0679468	7.29891	0.65585	0.870199	FALSE	-0.074487	7.11523	0.676696	0.883259	FALSE	-0.255017	7.30509	0.0535181	0.244401	FALSE	0.0873251	7.43413	0.584984	0.782696	FALSE	0.116204	6.98399	0.559408	0.80802	FALSE	-0.0507797	7.30322	0.72686	0.871929	FALSE	-0.10833	7.35694	0.417344	0.699439	FALSE	-0.186485	6.83472	0.318059	0.637141	FALSE	0.138549	6.35107	0.647862	0.835974
ALCAM	-0.34153	7.63323	0.123149	0.339255	FALSE	-0.120772	8.91363	0.503079	0.786588	FALSE	-0.296211	8.83007	0.167897	0.541742	FALSE	-0.284217	8.51835	0.157433	0.421751	FALSE	0.0437865	9.8926	0.713284	0.861419	FALSE	0.0874207	8.55433	0.633706	0.847037	FALSE	-0.146923	7.72395	0.419794	0.670487	FALSE	-0.0574925	8.31265	0.749886	0.901167	FALSE	-0.280243	8.31487	0.143739	0.469565	FALSE	-0.270655	10.4867	0.120086	0.426409
ALDH16A1	-0.016844	3.28047	0.908936	0.956707	FALSE	0.00783868	3.22556	0.948072	0.985275	FALSE	0.0430352	3.19573	0.782575	0.932236	FALSE	-0.190763	2.71514	0.28331	0.565332	FALSE	0.113306	3.40419	0.359051	0.614037	FALSE	0.00112404	3.03289	0.994792	0.998328	FALSE	-0.142285	3.23917	0.361375	0.625162	FALSE	NA	NA	NA	NA	NA	NA	NA	NA	NA	NA	NA	NA	NA	NA
ALDH1A1	-0.741144	6.31382	0.00104654	0.038228	TRUE	-0.652077	6.23376	0.00141433	0.0836823	TRUE	-0.881535	5.96009	0.00077762	0.0904613	TRUE	-0.237473	5.85298	0.324077	0.604835	FALSE	-0.882663	5.1116	0.00241002	0.050302	TRUE	-0.527485	6.00261	0.0248422	0.255373	FALSE	-0.680925	6.16164	0.000845223	0.0372573	TRUE	-0.591786	6.27921	0.00152544	0.0501198	TRUE	-0.317675	5.50318	0.18549	0.514458	FALSE	NA	NA	NA	NA
ALDH1A2	-0.369534	4.40493	0.144548	0.372064	FALSE	-0.0465448	5.89353	0.775212	0.917964	FALSE	-0.401744	5.26854	0.08027	0.425422	FALSE	-0.0948013	6.09503	0.609207	0.809683	FALSE	-0.211612	4.99003	0.260421	0.525996	FALSE	-0.290954	5.16888	0.19557	0.535955	FALSE	-0.138742	4.2748	0.59526	0.798105	FALSE	-0.313848	4.80008	0.115799	0.394563	FALSE	-0.427513	5.49855	0.0297653	0.247187	FALSE	NA	NA	NA	NA
ALDH2	0.0796458	9.07555	0.722568	0.856595	FALSE	-0.13268	8.7133	0.460168	0.758959	FALSE	-0.0867323	8.86133	0.693847	0.892368	FALSE	0.187182	8.46377	0.410972	0.678414	FALSE	-0.540684	7.71426	0.00496928	0.0707252	TRUE	-0.13037	8.51187	0.589355	0.823101	FALSE	-0.132479	9.09416	0.477642	0.719392	FALSE	-0.0740292	8.87728	0.692554	0.868837	FALSE	-0.0335325	8.03941	0.901221	0.966072	FALSE	-0.217549	8.09568	0.291378	0.609815
ALDH3A2	-0.0850569	5.80917	0.533759	0.736315	FALSE	-0.0315587	6.00579	0.768019	0.916111	FALSE	-0.0892121	5.59962	0.582807	0.840116	FALSE	-0.0580114	5.38285	0.633843	0.826015	FALSE	-0.249115	5.40206	0.0950873	0.314638	FALSE	-0.0398733	5.82661	0.719621	0.892122	FALSE	-0.149282	5.67215	0.229981	0.504725	FALSE	-0.0209313	5.79957	0.868229	0.954786	FALSE	-0.127726	5.67493	0.321158	0.639014	FALSE	NA	NA	NA	NA
ALDH3B1	0.156749	3.94684	0.345145	0.585629	FALSE	0.020119	4.24237	0.888374	0.962128	FALSE	0.0799311	4.00599	0.698463	0.895065	FALSE	-0.10308	3.46244	0.57719	0.791729	FALSE	0.125053	3.93253	0.427829	0.666543	FALSE	-0.103934	3.97448	0.620616	0.839889	FALSE	-0.19129	3.98402	0.236295	0.511391	FALSE	-0.0109231	4.01156	0.940228	0.979995	FALSE	NA	NA	NA	NA	NA	NA	NA	NA	NA
ALDH6A1	-0.216309	2.06527	0.163519	0.397211	FALSE	-0.0459728	2.33839	0.765176	0.915225	FALSE	-0.066907	2.22009	0.702601	0.896389	FALSE	NA	NA	NA	NA	NA	NA	NA	NA	NA	NA	NA	NA	NA	NA	NA	NA	NA	NA	NA	NA	NA	NA	NA	NA	NA	NA	NA	NA	NA	NA	NA	NA	NA	NA
ALDH7A1	-0.141789	2.16952	0.485223	0.701093	FALSE	-0.094707	2.39403	0.564092	0.819407	FALSE	-0.10257	2.26427	0.64016	0.86414	FALSE	NA	NA	NA	NA	NA	NA	NA	NA	NA	NA	NA	NA	NA	NA	NA	NA	NA	NA	NA	NA	NA	NA	NA	NA	NA	NA	NA	NA	NA	NA	NA	NA	NA	NA
ALDH9A1	0.169358	5.11597	0.189519	0.42856	FALSE	0.21291	5.1434	0.0498967	0.316252	FALSE	0.30701	4.97215	0.0350681	0.310504	FALSE	0.211061	4.75939	0.0576669	0.254519	FALSE	0.116353	4.85036	0.220794	0.486016	FALSE	0.214229	4.9758	0.135072	0.46602	FALSE	0.0665249	5.04806	0.616292	0.81219	FALSE	-0.0180353	4.97405	0.89678	0.964722	FALSE	0.0261118	5.01548	0.889869	0.961031	FALSE	NA	NA	NA	NA
ALDOA	0.493191	4.75782	0.00398662	0.0699307	TRUE	0.306649	4.47504	0.040571	0.288575	FALSE	0.198908	4.43322	0.27774	0.647984	FALSE	0.574468	4.51766	0.000466643	0.0285125	TRUE	0.361133	4.5271	0.00332843	0.0565833	TRUE	0.504001	4.51526	0.00271911	0.110828	FALSE	0.515638	4.7173	0.00328314	0.0710316	TRUE	0.535673	4.60041	0.00096203	0.0413336	TRUE	0.302926	4.63277	0.182625	0.511776	FALSE	NA	NA	NA	NA
ALG1	-0.095763	2.25254	0.498177	0.709406	FALSE	-0.0315333	2.32302	0.805959	0.93077	FALSE	0.157647	2.12983	0.34462	0.702831	FALSE	NA	NA	NA	NA	NA	-0.109536	2.23624	0.467655	0.69587	FALSE	NA	NA	NA	NA	NA	NA	NA	NA	NA	NA	NA	NA	NA	NA	NA	NA	NA	NA	NA	NA	NA	NA	NA	NA
ALG11	0.10286	3.17569	0.573067	0.763645	FALSE	0.149032	3.66286	0.303969	0.642774	FALSE	0.186461	3.54967	0.353969	0.708675	FALSE	0.178794	3.28761	0.330332	0.610202	FALSE	0.0204359	3.71895	0.899179	0.955694	FALSE	0.0384523	3.52019	0.821973	0.934929	FALSE	0.0193453	3.1657	0.906755	0.9618	FALSE	0.218246	3.42137	0.191451	0.494806	FALSE	NA	NA	NA	NA	NA	NA	NA	NA	NA
ALG12	NA	NA	NA	NA	NA	-0.270541	2.26201	0.00583765	0.130693	FALSE	-0.38544	2.12599	0.00627095	0.173805	FALSE	NA	NA	NA	NA	NA	-0.430438	2.18708	0.0355678	0.190765	FALSE	NA	NA	NA	NA	NA	NA	NA	NA	NA	NA	NA	NA	NA	NA	NA	NA	NA	NA	NA	NA	NA	NA	NA	NA
ALG13	0.0799729	5.39275	0.442606	0.66709	FALSE	-0.00260987	5.69471	0.975291	0.993651	FALSE	0.0657629	5.63829	0.512985	0.804409	FALSE	0.0514827	5.28288	0.590017	0.80034	FALSE	0.00806443	5.68082	0.912631	0.962388	FALSE	0.119128	5.55338	0.171503	0.509286	FALSE	0.0339437	5.33224	0.692585	0.85364	FALSE	0.0238974	5.46412	0.797964	0.925276	FALSE	0.0633068	5.46308	0.652462	0.860656	FALSE	-0.19587	5.74824	0.293989	0.611919
ALG14	0.0880678	3.79184	0.512369	0.720048	FALSE	-0.0630443	4.24113	0.526668	0.798903	FALSE	0.00184518	3.82078	0.989831	0.996098	FALSE	0.18066	3.51383	0.297783	0.578562	FALSE	-0.151797	3.44835	0.307635	0.571237	FALSE	0.137745	3.76354	0.328172	0.661681	FALSE	-0.136739	3.71423	0.323722	0.59284	FALSE	0.270148	3.64005	0.291787	0.59936	FALSE	NA	NA	NA	NA	NA	NA	NA	NA	NA
ALG2	0.0971756	4.88101	0.392208	0.624115	FALSE	0.161171	4.79554	0.068487	0.35489	FALSE	0.07879	4.89653	0.481071	0.787221	FALSE	0.106945	4.55601	0.378822	0.652014	FALSE	0.140413	4.9469	0.126266	0.362431	FALSE	0.214549	4.86136	0.0768145	0.375638	FALSE	0.179013	4.95808	0.0950444	0.324985	FALSE	0.204412	4.81224	0.0575929	0.291087	FALSE	0.150369	4.95176	0.31739	0.636924	FALSE	-0.276011	6.65168	0.140618	0.454859
ALG3	0.267835	4.21448	0.156797	0.387873	FALSE	0.294887	3.82915	0.0572368	0.334313	FALSE	0.397075	3.84065	0.0854656	0.437198	FALSE	-0.204385	3.43608	0.126883	0.377257	FALSE	0.0495451	4.1325	0.705792	0.856817	FALSE	0.172392	3.8493	0.307091	0.642083	FALSE	-0.0570243	4.19588	0.753248	0.887344	FALSE	0.125043	4.14009	0.384787	0.677089	FALSE	NA	NA	NA	NA	NA	NA	NA	NA	NA
ALG5	0.30159	5.5232	0.0150255	0.123957	FALSE	0.144758	5.3066	0.0998139	0.415375	FALSE	0.317205	5.29036	0.00759101	0.187241	FALSE	0.260226	4.88585	0.0886682	0.315665	FALSE	0.210585	5.22205	0.0256184	0.162453	FALSE	0.251919	5.23697	0.0466755	0.321231	FALSE	0.179703	5.4771	0.135509	0.386296	FALSE	0.184525	5.42185	0.0920011	0.357469	FALSE	0.0405584	5.10228	0.797541	0.923263	FALSE	-0.297316	5.15336	0.292565	0.610837
ALG6	0.12375	2.18166	0.447471	0.670897	FALSE	0.279225	2.91414	0.045536	0.303125	FALSE	0.179943	2.48029	0.394857	0.735886	FALSE	NA	NA	NA	NA	NA	0.17412	2.67612	0.216346	0.481091	FALSE	NA	NA	NA	NA	NA	NA	NA	NA	NA	NA	NA	NA	NA	NA	NA	NA	NA	NA	NA	NA	NA	NA	NA	NA
ALG8	0.144883	3.60683	0.208964	0.45182	FALSE	0.164056	4.02869	0.0263499	0.243793	FALSE	0.295936	3.70652	0.023292	0.275057	FALSE	0.207246	3.24759	0.168514	0.436852	FALSE	0.0613003	3.8224	0.568591	0.771866	FALSE	0.170581	3.55324	0.253569	0.592675	FALSE	-0.120307	3.55796	0.308867	0.581142	FALSE	0.0191621	3.70044	0.875883	0.957336	FALSE	NA	NA	NA	NA	NA	NA	NA	NA	NA
ALG9	0.474242	5.22272	0.0497816	0.217138	FALSE	0.371844	5.61008	0.0775633	0.374614	FALSE	0.210208	4.6797	0.261564	0.633947	FALSE	0.313409	4.77138	0.0453329	0.223653	FALSE	-0.144049	3.94709	0.308042	0.571426	FALSE	0.423977	5.01861	0.0365282	0.290889	FALSE	0.531821	4.89204	0.0147031	0.142917	FALSE	0.387755	4.94769	0.0476943	0.269386	FALSE	0.46194	4.98641	0.0359682	0.266534	FALSE	NA	NA	NA	NA
ALK	0.191712	2.70288	0.401102	0.633103	FALSE	0.394534	3.61744	0.013507	0.185818	FALSE	-0.0566708	2.9157	0.786248	0.934251	FALSE	-0.0772399	2.83709	0.799875	0.918738	FALSE	0.29083	2.7488	0.130325	0.367737	FALSE	0.354627	3.46282	0.137402	0.46948	FALSE	0.301073	2.72526	0.215912	0.486822	FALSE	NA	NA	NA	NA	NA	NA	NA	NA	NA	NA	NA	NA	NA	NA
ALKBH1	-0.267232	3.41526	0.00300598	0.0601997	TRUE	-0.226258	4.33905	0.00549855	0.128379	FALSE	-0.282306	3.99308	0.00397778	0.153746	FALSE	-0.308155	3.71396	0.0355232	0.198691	FALSE	-0.318943	4.22828	0.00136631	0.0377332	TRUE	-0.213789	4.00768	0.0580504	0.341381	FALSE	-0.166701	3.30906	0.221751	0.493894	FALSE	-0.258854	3.79299	0.0191507	0.170136	FALSE	NA	NA	NA	NA	NA	NA	NA	NA	NA
ALKBH2	0.075007	1.70156	0.68537	0.835472	FALSE	0.14364	1.56769	0.37955	0.703871	FALSE	NA	NA	NA	NA	NA	NA	NA	NA	NA	NA	NA	NA	NA	NA	NA	NA	NA	NA	NA	NA	NA	NA	NA	NA	NA	NA	NA	NA	NA	NA	NA	NA	NA	NA	NA	NA	NA	NA	NA
ALKBH3	0.0619612	4.09535	0.619818	0.794885	FALSE	-0.0235076	4.26653	0.806781	0.931009	FALSE	0.0303563	4.09161	0.82012	0.945089	FALSE	0.0618676	3.72231	0.72586	0.880113	FALSE	-0.10017	3.71809	0.323863	0.585928	FALSE	0.0902677	4.09198	0.526261	0.790813	FALSE	-0.107212	4.06389	0.323447	0.59284	FALSE	-0.019608	4.08145	0.851063	0.948266	FALSE	NA	NA	NA	NA	NA	NA	NA	NA	NA
ALKBH4	-0.155815	2.28209	0.480049	0.697441	FALSE	0.151351	2.46285	0.370987	0.696282	FALSE	0.414575	2.23998	0.042509	0.330177	FALSE	NA	NA	NA	NA	NA	-0.303147	2.4222	0.0511538	0.23006	FALSE	NA	NA	NA	NA	NA	-0.0672174	2.51512	0.692269	0.853497	FALSE	NA	NA	NA	NA	NA	NA	NA	NA	NA	NA	NA	NA	NA	NA
ALKBH5	-0.0390827	4.59445	0.714	0.852628	FALSE	0.011119	4.89763	0.88331	0.959252	FALSE	0.00176931	4.66217	0.986704	0.995537	FALSE	-0.055066	4.53075	0.631382	0.823646	FALSE	0.00112373	4.79058	0.990794	0.994619	FALSE	0.0797174	4.84199	0.458231	0.74806	FALSE	-0.0291851	4.50773	0.798753	0.913732	FALSE	0.0185448	4.60995	0.868405	0.954786	FALSE	0.110957	4.64567	0.403801	0.709342	FALSE	NA	NA	NA	NA
ALKBH7	-0.0563357	6.5046	0.746381	0.869188	FALSE	-0.150979	6.00154	0.383434	0.707237	FALSE	-0.140531	6.05111	0.468397	0.780584	FALSE	-0.10614	6.17271	0.558653	0.780986	FALSE	-0.00540043	5.92564	0.972723	0.987189	FALSE	0.0604403	6.29132	0.714282	0.889158	FALSE	0.0543959	6.44251	0.71235	0.863716	FALSE	-0.112743	6.16549	0.424514	0.706428	FALSE	-0.227431	6.04991	0.285293	0.61421	FALSE	0.156224	6.22651	0.502573	0.748609
ALKBH8	0.0225906	1.78721	0.897605	0.951225	FALSE	-0.0483112	2.7335	0.756891	0.912051	FALSE	0.0984934	2.25519	0.710522	0.89993	FALSE	NA	NA	NA	NA	NA	NA	NA	NA	NA	NA	NA	NA	NA	NA	NA	NA	NA	NA	NA	NA	NA	NA	NA	NA	NA	NA	NA	NA	NA	NA	NA	NA	NA	NA
ALMS1	-0.280911	3.22952	0.0869339	0.285862	FALSE	-0.00277158	4.50189	0.974391	0.993649	FALSE	-0.0691734	4.11105	0.662859	0.875917	FALSE	-0.542252	3.64739	0.0203706	0.153879	FALSE	-0.336838	4.03641	0.00641386	0.0815247	TRUE	-0.179095	4.19473	0.306503	0.641899	FALSE	-0.0765833	3.27089	0.56218	0.776787	FALSE	0.0205448	3.85294	0.880903	0.959249	FALSE	NA	NA	NA	NA	NA	NA	NA	NA	NA
ALOX12-AS1	-0.33301	3.69562	0.0170908	0.132396	FALSE	-0.180979	4.25825	0.0589849	0.337331	FALSE	-0.301373	4.08491	0.0214084	0.26679	FALSE	-0.21024	4.37488	0.102343	0.338153	FALSE	-0.127959	4.32802	0.226664	0.491772	FALSE	-0.222623	4.18136	0.0692359	0.36175	FALSE	-0.232317	3.70395	0.0936378	0.322815	FALSE	-0.194807	3.94588	0.201977	0.505138	FALSE	-0.156809	4.34446	0.364523	0.676603	FALSE	NA	NA	NA	NA
ALOX5	-0.0358047	6.29272	0.885052	0.944798	FALSE	-0.167389	6.857	0.376511	0.701676	FALSE	-0.282665	6.25859	0.377424	0.727778	FALSE	0.225439	6.28824	0.1676	0.435534	FALSE	-0.907186	5.38403	1.27346e-05	0.0039736	TRUE	-0.5966	5.84678	0.00845999	0.159574	FALSE	-0.350408	6.2891	0.10452	0.340421	FALSE	-0.372386	6.26679	0.0965345	0.365283	FALSE	-0.119944	5.73419	0.53016	0.79059	FALSE	NA	NA	NA	NA
ALOX5AP	0.237534	7.97883	0.356626	0.594994	FALSE	-0.0870294	7.53234	0.657336	0.870322	FALSE	-0.338437	7.31533	0.175782	0.548733	FALSE	0.463594	8.10089	0.1452	0.403848	FALSE	0.0550673	6.83746	0.822565	0.922139	FALSE	0.108946	7.34862	0.647956	0.853612	FALSE	0.302076	7.98017	0.16405	0.427608	FALSE	0.311701	7.69182	0.110749	0.388826	FALSE	0.384587	7.83327	0.260977	0.596223	FALSE	-0.340725	6.90333	0.289384	0.609815
ALPK1	-0.553993	4.48222	0.0249	0.157623	FALSE	-0.264565	5.70452	0.243004	0.583992	FALSE	-0.177008	5.25159	0.526215	0.810889	FALSE	-0.432999	4.35254	0.108633	0.34743	FALSE	-0.477964	4.94613	0.0397472	0.201713	FALSE	-0.446506	4.66518	0.106686	0.428211	FALSE	-0.703273	4.47303	0.00133168	0.0460549	TRUE	-0.574008	5.20696	0.00315436	0.0720381	TRUE	NA	NA	NA	NA	NA	NA	NA	NA	NA
ALPK3	-0.691474	2.9684	0.00527643	0.0770187	TRUE	-0.572183	4.35251	0.00612156	0.13329	FALSE	-0.912895	3.02067	0.00524963	0.163003	FALSE	-0.59641	4.50963	0.00161965	0.0497963	TRUE	NA	NA	NA	NA	NA	-0.383176	3.48451	0.13128	0.462859	FALSE	-0.310663	2.7112	0.171626	0.438059	FALSE	NA	NA	NA	NA	NA	NA	NA	NA	NA	NA	NA	NA	NA	NA
ALS2	-0.0633293	2.96046	0.703887	0.847323	FALSE	0.129469	3.98435	0.29253	0.632799	FALSE	0.154844	3.64426	0.356658	0.711213	FALSE	-0.530697	3.28445	0.012611	0.123999	FALSE	-0.236145	4.04075	0.129241	0.366295	FALSE	-0.181394	3.69792	0.355782	0.678716	FALSE	-0.205119	2.91877	0.191021	0.459831	FALSE	-0.00781293	3.2144	0.969913	0.988695	FALSE	NA	NA	NA	NA	NA	NA	NA	NA	NA
ALYREF	0.53944	5.22438	0.00231503	0.0527858	TRUE	0.3622	4.91155	0.00657676	0.135907	FALSE	0.473567	5.01083	0.00228418	0.12063	FALSE	0.38802	5.05706	0.0148164	0.131537	FALSE	0.419547	5.40903	0.000248129	0.0160235	TRUE	0.45294	5.08893	0.00442847	0.128015	FALSE	0.449961	5.19078	0.00635871	0.100556	FALSE	0.421994	5.14848	0.00130376	0.0480405	TRUE	0.550037	5.34169	0.00155055	0.0822218	TRUE	0.135298	5.77798	0.480027	0.732838
AMACR	NA	NA	NA	NA	NA	-0.239506	1.71384	0.174888	0.513478	FALSE	-0.0233954	1.68527	0.913428	0.976021	FALSE	NA	NA	NA	NA	NA	NA	NA	NA	NA	NA	NA	NA	NA	NA	NA	NA	NA	NA	NA	NA	NA	NA	NA	NA	NA	NA	NA	NA	NA	NA	NA	NA	NA	NA
AMBRA1	-0.230637	5.21251	0.0252263	0.157968	FALSE	-0.191581	6.28518	0.0228824	0.231558	FALSE	-0.194208	6.01909	0.0717796	0.404743	FALSE	-0.45368	5.79238	0.000759589	0.0345899	TRUE	-0.235319	5.9258	0.0048301	0.0692983	TRUE	-0.180372	5.8428	0.0919001	0.406309	FALSE	-0.236908	5.19751	0.0326379	0.200064	FALSE	-0.0940558	5.72035	0.368968	0.669157	FALSE	-0.266102	5.71287	0.0632776	0.333709	FALSE	-0.544852	6.48139	0.00110053	0.067441
AMD1	0.343014	6.73484	0.0169886	0.131814	FALSE	0.170927	6.8036	0.155578	0.49274	FALSE	0.0450355	6.73222	0.76046	0.91944	FALSE	0.37514	7.39485	0.00438919	0.0766242	TRUE	0.239181	6.70132	0.0242426	0.158251	FALSE	0.303099	6.93213	0.0110607	0.177919	FALSE	0.250116	6.61408	0.0420237	0.223281	FALSE	0.218199	6.83729	0.0597446	0.297295	FALSE	0.0674673	7.45626	0.580541	0.81902	FALSE	0.300769	6.89383	0.125971	0.434798
AMDHD2	-0.163422	3.6708	0.310707	0.553914	FALSE	-0.13422	3.69699	0.357799	0.687145	FALSE	-0.154057	3.39358	0.447965	0.76862	FALSE	-0.298692	3.25036	0.0623892	0.263591	FALSE	0.0493363	3.76268	0.695244	0.848939	FALSE	-0.230222	3.26184	0.182985	0.523393	FALSE	-0.271628	3.81786	0.129323	0.378125	FALSE	-0.217321	3.6222	0.189474	0.494515	FALSE	NA	NA	NA	NA	NA	NA	NA	NA	NA
AMFR	0.156225	5.32372	0.145502	0.37286	FALSE	0.0644944	5.92531	0.456186	0.757878	FALSE	0.0588244	5.57158	0.578417	0.837632	FALSE	0.00664486	5.60816	0.948974	0.98065	FALSE	-0.10252	5.27033	0.352044	0.60902	FALSE	0.0655367	5.7046	0.630504	0.844908	FALSE	0.107874	5.29526	0.283271	0.556898	FALSE	0.0953088	5.41819	0.279933	0.585914	FALSE	0.311169	5.65667	0.0085997	0.153317	FALSE	-0.369696	5.36677	0.0756053	0.349324
AMIGO2	0.0714814	6.02134	0.683577	0.834932	FALSE	-0.0276825	6.35822	0.847545	0.947772	FALSE	0.0117323	6.21	0.956051	0.98932	FALSE	0.0317427	6.05522	0.783299	0.91152	FALSE	0.0449019	4.66731	0.842992	0.930085	FALSE	-0.0138356	6.10474	0.929557	0.980202	FALSE	0.0721398	5.85833	0.709617	0.862722	FALSE	-0.0636077	5.94837	0.721594	0.884939	FALSE	-0.0307588	5.98133	0.857645	0.946932	FALSE	NA	NA	NA	NA
AMMECR1	-0.0197831	2.4401	0.892254	0.948388	FALSE	-0.132747	3.50304	0.21384	0.553481	FALSE	-0.105892	3.09231	0.481232	0.787241	FALSE	-0.274757	2.79554	0.0909873	0.32023	FALSE	0.0174768	3.52823	0.885995	0.948703	FALSE	0.1174	3.08415	0.487803	0.768794	FALSE	-0.263088	2.55753	0.0613217	0.264053	FALSE	NA	NA	NA	NA	NA	NA	NA	NA	NA	NA	NA	NA	NA	NA
AMMECR1L	0.181316	3.04714	0.112968	0.326252	FALSE	-0.0367575	3.78937	0.649767	0.866601	FALSE	0.0393169	3.57504	0.715394	0.902382	FALSE	0.109891	3.80358	0.520884	0.757207	FALSE	0.00934183	3.69504	0.932205	0.970325	FALSE	0.045193	3.58636	0.795001	0.924951	FALSE	0.128366	3.09309	0.310116	0.582348	FALSE	NA	NA	NA	NA	NA	0.39828	4.2048	0.0298933	0.247187	FALSE	NA	NA	NA	NA
AMN1	-0.10571	2.85763	0.374261	0.608273	FALSE	-0.386624	3.4671	2.30303e-05	0.0120214	TRUE	-0.0902419	3.3703	0.552704	0.825962	FALSE	-0.0227121	3.35226	0.883336	0.953326	FALSE	-0.107375	3.63585	0.427078	0.666209	FALSE	-0.177763	3.29216	0.245859	0.583415	FALSE	-0.164402	2.94988	0.195528	0.46478	FALSE	NA	NA	NA	NA	NA	NA	NA	NA	NA	NA	NA	NA	NA	NA
AMOTL1	-0.351276	3.32204	0.0134061	0.116609	FALSE	-0.168637	4.42491	0.185195	0.525336	FALSE	-0.265687	3.6089	0.124789	0.489477	FALSE	-0.0446415	3.72595	0.793766	0.915704	FALSE	NA	NA	NA	NA	NA	-0.155116	3.5822	0.34625	0.673207	FALSE	-0.172851	3.25428	0.249465	0.52475	FALSE	-0.151972	3.48796	0.37116	0.669157	FALSE	NA	NA	NA	NA	NA	NA	NA	NA	NA
AMPD3	0.196893	3.26446	0.50176	0.711745	FALSE	0.0940471	3.90219	0.774795	0.91788	FALSE	0.137724	5.15018	0.624509	0.858385	FALSE	0.209595	4.22675	0.556083	0.778484	FALSE	0.235595	6.86319	0.176182	0.427655	FALSE	0.215625	3.66706	0.415966	0.720149	FALSE	-0.0572503	3.98172	0.826721	0.928784	FALSE	0.39561	4.06942	0.19087	0.494661	FALSE	NA	NA	NA	NA	NA	0.28777	6.5176	0.376999	0.666773
AMY2B	NA	NA	NA	NA	NA	-0.0507912	2.36339	0.737918	0.903606	FALSE	0.0259663	2.07175	0.906614	0.973092	FALSE	NA	NA	NA	NA	NA	NA	NA	NA	NA	NA	NA	NA	NA	NA	NA	NA	NA	NA	NA	NA	NA	NA	NA	NA	NA	NA	NA	NA	NA	NA	NA	NA	NA	NA
AMZ1	1.46144	4.83936	0.00376224	0.0680271	TRUE	1.22295	5.68216	0.00706164	0.140582	FALSE	0.986835	5.4076	0.0380902	0.315947	FALSE	0.78495	4.96432	0.0127192	0.123999	FALSE	0.735418	5.21234	0.0315355	0.17976	FALSE	1.12803	5.34228	0.00476126	0.128583	FALSE	1.2627	4.7758	0.00478337	0.0872006	TRUE	1.18038	4.88055	0.00838853	0.118019	FALSE	0.815639	5.15861	0.0590653	0.320862	FALSE	0.172751	5.30988	0.574189	0.795019
AMZ2	0.0705412	3.96024	0.62121	0.795309	FALSE	0.135012	3.87688	0.133765	0.464604	FALSE	0.198453	3.79481	0.0683858	0.396219	FALSE	0.143323	3.66676	0.33478	0.61381	FALSE	-0.0319952	3.67475	0.786048	0.903303	FALSE	-0.103454	3.83714	0.462678	0.751924	FALSE	-0.00237621	4.03872	0.986205	0.995429	FALSE	0.098852	3.81941	0.37448	0.670951	FALSE	NA	NA	NA	NA	NA	NA	NA	NA	NA
ANAPC1	0.163964	3.28161	0.149846	0.37888	FALSE	0.203656	4.15314	0.0234566	0.233796	FALSE	0.177586	3.72941	0.229207	0.600002	FALSE	0.0701498	3.22027	0.66551	0.846152	FALSE	-0.00859393	3.85532	0.93642	0.972187	FALSE	0.119886	3.81856	0.37696	0.692292	FALSE	0.0305911	3.27433	0.805157	0.917548	FALSE	0.0598668	3.68675	0.537907	0.785938	FALSE	NA	NA	NA	NA	NA	NA	NA	NA	NA
ANAPC10	0.194038	5.41764	0.105986	0.314178	FALSE	0.0438159	5.85055	0.596857	0.840712	FALSE	0.145449	5.64276	0.200267	0.570379	FALSE	-0.110257	5.32909	0.355373	0.63504	FALSE	-0.0427143	5.71733	0.616997	0.803022	FALSE	0.0402262	5.70799	0.729237	0.897639	FALSE	0.164788	5.37727	0.135478	0.386296	FALSE	0.0219782	5.63035	0.794205	0.923058	FALSE	0.0721687	5.59208	0.662891	0.865486	FALSE	NA	NA	NA	NA
ANAPC11	0.221927	6.99174	0.135422	0.359707	FALSE	0.0616943	6.63543	0.630819	0.8561	FALSE	0.163304	6.71921	0.243289	0.614602	FALSE	0.0900187	6.5296	0.528409	0.761813	FALSE	0.184543	6.79461	0.133974	0.37216	FALSE	0.0593636	6.83776	0.730326	0.897736	FALSE	0.163057	6.98484	0.198677	0.469131	FALSE	0.116271	6.87553	0.317661	0.624728	FALSE	0.0662712	6.68636	0.654185	0.861058	FALSE	0.174512	6.93403	0.271849	0.598342
ANAPC13	0.367461	4.699	0.0367201	0.188589	FALSE	0.160256	4.41454	0.275704	0.615761	FALSE	0.357557	4.47225	0.0349715	0.310504	FALSE	0.403667	4.38587	0.00910738	0.106702	FALSE	0.354107	4.46224	0.0335136	0.185217	FALSE	0.233263	4.54893	0.125137	0.456006	FALSE	0.190676	4.70836	0.21577	0.486682	FALSE	0.20883	4.6053	0.169751	0.466454	FALSE	-0.0480047	4.51032	0.792899	0.922145	FALSE	NA	NA	NA	NA
ANAPC15	0.228973	4.68254	0.31569	0.558752	FALSE	-0.174503	4.21183	0.345642	0.678559	FALSE	-0.164783	4.20327	0.457143	0.773669	FALSE	0.367144	4.60425	0.143664	0.402131	FALSE	0.168513	4.0811	0.37115	0.624187	FALSE	0.0342143	4.3904	0.877863	0.959532	FALSE	0.191474	4.56946	0.409807	0.6641	FALSE	0.159359	4.33272	0.407306	0.693484	FALSE	NA	NA	NA	NA	NA	NA	NA	NA	NA
ANAPC16	0.322988	6.54134	0.0159123	0.127731	FALSE	0.124682	6.39076	0.179978	0.519798	FALSE	0.199179	6.37747	0.0717276	0.404743	FALSE	0.293013	6.23368	0.0325223	0.192455	FALSE	0.140172	6.15198	0.163045	0.41138	FALSE	0.140367	6.48968	0.275526	0.616356	FALSE	0.146654	6.51238	0.115585	0.355481	FALSE	0.159042	6.41382	0.0785348	0.336118	FALSE	-0.00929144	6.22031	0.947153	0.981665	FALSE	0.107587	6.44816	0.497681	0.744093
ANAPC4	-0.11686	3.92463	0.353795	0.592676	FALSE	0.026813	4.75863	0.763819	0.9147	FALSE	-0.0265871	4.29827	0.849098	0.952398	FALSE	-0.400165	3.63888	0.0074807	0.0974081	TRUE	-0.0215766	4.28924	0.830929	0.925277	FALSE	-0.0901109	4.34554	0.458237	0.74806	FALSE	-0.115853	3.90464	0.355811	0.620396	FALSE	-0.102881	4.26596	0.369088	0.669157	FALSE	NA	NA	NA	NA	NA	NA	NA	NA	NA
ANAPC5	-0.0702004	5.06313	0.510516	0.719102	FALSE	0.0182535	5.4092	0.796433	0.927561	FALSE	0.0608314	5.20425	0.53923	0.820105	FALSE	0.029012	4.70752	0.810374	0.924995	FALSE	0.0187904	5.25449	0.812061	0.916632	FALSE	-0.0363145	5.21838	0.71763	0.890872	FALSE	-0.143189	4.96396	0.141658	0.395158	FALSE	0.00645216	5.17135	0.94727	0.982966	FALSE	-0.18532	4.95	0.250687	0.589853	FALSE	NA	NA	NA	NA
ANAPC7	-0.339614	4.07114	0.00936768	0.0981342	TRUE	-0.0725335	4.84589	0.500565	0.78507	FALSE	-0.0163655	4.47195	0.909211	0.974164	FALSE	-0.297053	3.78516	0.0490365	0.233511	FALSE	-0.138657	4.56484	0.288695	0.554736	FALSE	-0.108127	4.30859	0.536072	0.796613	FALSE	-0.346445	4.01244	0.0025142	0.0612326	TRUE	-0.0876362	4.35141	0.508834	0.767816	FALSE	NA	NA	NA	NA	NA	NA	NA	NA	NA
ANGEL1	-0.32439	3.20381	0.0512903	0.220193	FALSE	-0.280227	4.32309	0.0816016	0.381669	FALSE	-0.133892	3.7299	0.517842	0.807239	FALSE	-0.472983	2.51928	0.029729	0.185403	FALSE	-0.614109	3.28451	0.00259371	0.0512458	TRUE	-0.587692	3.48672	0.00213019	0.0977117	TRUE	-0.530117	3.34692	0.0034816	0.0726221	TRUE	-0.570157	3.49332	0.0051315	0.0908639	TRUE	NA	NA	NA	NA	NA	NA	NA	NA	NA
ANGEL2	0.0456367	3.82108	0.685908	0.835895	FALSE	0.123827	4.46222	0.130646	0.460303	FALSE	0.204567	4.26913	0.103178	0.464625	FALSE	-0.0653669	3.80912	0.644997	0.833826	FALSE	-0.0453308	4.30917	0.677253	0.839213	FALSE	0.0156994	4.20057	0.879871	0.959829	FALSE	-0.0691238	3.90122	0.525478	0.749824	FALSE	0.005243	4.12115	0.953877	0.984359	FALSE	NA	NA	NA	NA	NA	NA	NA	NA	NA
ANGPT2	0.013033	4.00955	0.943159	0.972988	FALSE	0.159025	4.93166	0.339797	0.673071	FALSE	-0.0880038	4.0422	0.664371	0.876589	FALSE	0.132205	4.21663	0.440412	0.69953	FALSE	-0.197874	3.60603	0.247695	0.515201	FALSE	0.00254187	4.23743	0.989701	0.996573	FALSE	-0.0500831	3.74668	0.764463	0.894491	FALSE	-0.0513796	4.01325	0.788373	0.919633	FALSE	-0.135378	4.46213	0.625783	0.846954	FALSE	NA	NA	NA	NA
ANK2	-0.985752	3.28061	0.0389574	0.1943	FALSE	-0.482378	4.95727	0.268567	0.608297	FALSE	-0.527825	4.10846	0.316497	0.682623	FALSE	-0.537205	3.43627	0.182605	0.454231	FALSE	NA	NA	NA	NA	NA	-0.3544	4.01591	0.41039	0.715898	FALSE	-0.646892	3.2856	0.0989306	0.331263	FALSE	-0.673182	4.03236	0.117022	0.395183	FALSE	NA	NA	NA	NA	NA	NA	NA	NA	NA
ANK3	NA	NA	NA	NA	NA	NA	NA	NA	NA	NA	NA	NA	NA	NA	NA	NA	NA	NA	NA	NA	NA	NA	NA	NA	NA	NA	NA	NA	NA	NA	NA	NA	NA	NA	NA	NA	NA	NA	NA	NA	NA	NA	NA	NA	NA	-1.06745	5.64461	0.0271902	0.232783
ANKAR	-0.125002	2.70705	0.452358	0.675731	FALSE	0.0446795	3.91024	0.695542	0.884488	FALSE	0.138657	3.5578	0.324348	0.688699	FALSE	-0.155478	2.86302	0.363667	0.640313	FALSE	-0.145843	3.57607	0.287466	0.553643	FALSE	-0.122721	3.43356	0.455164	0.747449	FALSE	0.0425728	2.73293	0.818739	0.923717	FALSE	-0.252216	3.30375	0.107314	0.385398	FALSE	NA	NA	NA	NA	NA	NA	NA	NA	NA
ANKDD1A	0.191061	2.05712	0.560464	0.756254	FALSE	-0.176082	3.07334	0.42127	0.733224	FALSE	-0.192103	2.63941	0.467346	0.780115	FALSE	0.393379	3.70059	0.134992	0.389019	FALSE	-0.110733	3.13089	0.503213	0.72302	FALSE	0.218932	2.54391	0.440886	0.735332	FALSE	NA	NA	NA	NA	NA	NA	NA	NA	NA	NA	NA	NA	NA	NA	NA	NA	NA	NA	NA
ANKFY1	-0.262358	4.4826	0.212114	0.454563	FALSE	-0.0219752	5.59925	0.886795	0.961118	FALSE	0.0105163	5.21067	0.962339	0.990761	FALSE	-0.557882	4.13106	0.00609753	0.0891902	TRUE	-0.0818731	5.44758	0.579453	0.780226	FALSE	-0.100434	4.98353	0.50652	0.779773	FALSE	-0.254268	4.47983	0.171326	0.438048	FALSE	0.0640904	5.68725	0.724641	0.887367	FALSE	-0.498561	4.59101	0.020375	0.221322	FALSE	NA	NA	NA	NA
ANKH	0.208574	2.05739	0.296112	0.541733	FALSE	0.0442207	3.15825	0.783899	0.920735	FALSE	0.202975	2.66485	0.315303	0.682047	FALSE	0.0989495	3.31864	0.649985	0.837471	FALSE	0.140742	3.97261	0.453016	0.684746	FALSE	0.159182	2.63598	0.548002	0.802582	FALSE	NA	NA	NA	NA	NA	NA	NA	NA	NA	NA	NA	NA	NA	NA	NA	NA	NA	NA	NA
ANKHD1	-0.411456	6.24226	0.000476922	0.0270538	TRUE	-0.218907	7.1529	0.010501	0.166182	FALSE	-0.28261	6.8444	0.0121789	0.218446	FALSE	-0.276046	6.89853	0.0177684	0.144027	FALSE	-0.231832	7.176	0.00288721	0.0532198	TRUE	-0.188679	6.78625	0.102857	0.423284	FALSE	-0.429272	6.18716	6.18458e-05	0.0117225	TRUE	-0.330152	6.53567	0.00259566	0.0668325	TRUE	-0.295332	6.90468	0.0257064	0.23768	FALSE	-0.416637	6.93696	0.00409365	0.104373
ANKIB1	-0.430501	5.2665	0.00838322	0.092674	TRUE	-0.0409617	6.47255	0.677758	0.879005	FALSE	-0.136074	6.05107	0.299133	0.666462	FALSE	-0.355886	5.48866	0.0353518	0.198563	FALSE	-0.214604	6.13843	0.0414069	0.205768	FALSE	-0.175686	6.04863	0.12911	0.460342	FALSE	-0.162334	5.29434	0.242923	0.519767	FALSE	-0.105346	5.93502	0.483807	0.74964	FALSE	-0.400043	5.92193	0.0267783	0.239957	FALSE	-0.181415	6.09206	0.39403	0.677975
ANKLE2	0.0683186	5.54061	0.564383	0.759017	FALSE	-0.130291	5.93921	0.153949	0.491435	FALSE	-0.138007	6.00798	0.282311	0.651596	FALSE	0.28153	6.29781	0.0562094	0.251808	FALSE	0.0257558	6.1694	0.797858	0.909187	FALSE	0.0959539	6.00755	0.412811	0.717938	FALSE	-0.032754	5.5283	0.73888	0.879494	FALSE	0.110663	5.73164	0.311916	0.618902	FALSE	0.262065	6.47692	0.0320314	0.254081	FALSE	-0.337024	7.17975	0.0540811	0.303736
ANKMY1	-0.40608	2.88075	0.0410939	0.1989	FALSE	-0.0819608	4.35863	0.585934	0.832785	FALSE	-0.246929	3.55155	0.300016	0.66674	FALSE	-0.66554	3.21931	0.00104439	0.0418361	TRUE	-0.100515	3.8796	0.436969	0.674017	FALSE	-0.224245	3.74211	0.416249	0.720311	FALSE	-0.243768	2.97096	0.15347	0.413862	FALSE	NA	NA	NA	NA	NA	NA	NA	NA	NA	NA	NA	NA	NA	NA
ANKMY2	0.0581567	3.95484	0.588464	0.773916	FALSE	0.0478126	4.69588	0.601469	0.843827	FALSE	0.0750739	4.17967	0.541499	0.82267	FALSE	-0.0896259	4.57708	0.451587	0.706879	FALSE	-0.0819171	4.00221	0.613446	0.800675	FALSE	0.0986184	4.33385	0.501316	0.777409	FALSE	-0.0388467	3.83297	0.753991	0.887785	FALSE	-0.0542501	4.48016	0.672979	0.859751	FALSE	-0.0216044	4.471	0.889316	0.961031	FALSE	NA	NA	NA	NA
ANKRA2	0.0682188	3.34625	0.620593	0.795168	FALSE	0.253895	3.61493	0.0527106	0.320834	FALSE	0.159016	3.54677	0.332997	0.695618	FALSE	0.0656791	3.18545	0.674893	0.851888	FALSE	-0.0109407	3.65346	0.923076	0.96731	FALSE	0.243063	3.56199	0.074296	0.369418	FALSE	0.120865	3.37475	0.336012	0.603065	FALSE	0.419059	3.46507	0.00310828	0.0716598	TRUE	NA	NA	NA	NA	NA	NA	NA	NA	NA
ANKRD10	0.142108	5.13573	0.262345	0.505942	FALSE	-0.0281658	5.79116	0.752196	0.909792	FALSE	0.00764694	5.55474	0.948903	0.986607	FALSE	0.257593	6.19754	0.108278	0.347281	FALSE	0.111045	6.01054	0.269969	0.535927	FALSE	-0.0030291	5.63533	0.978368	0.992355	FALSE	-0.0226917	5.00378	0.827808	0.928951	FALSE	0.0431974	5.46467	0.689633	0.867422	FALSE	0.195626	6.01896	0.14047	0.463999	FALSE	-0.19186	7.46469	0.251594	0.578146
ANKRD10-IT1	NA	NA	NA	NA	NA	-0.112554	1.80483	0.441509	0.74821	FALSE	NA	NA	NA	NA	NA	NA	NA	NA	NA	NA	NA	NA	NA	NA	NA	NA	NA	NA	NA	NA	NA	NA	NA	NA	NA	NA	NA	NA	NA	NA	NA	NA	NA	NA	NA	NA	NA	NA	NA
ANKRD11	-0.302882	6.42997	0.00520792	0.0766106	TRUE	-0.12012	7.47822	0.0955497	0.40689	FALSE	-0.256839	7.08772	0.0111657	0.21629	FALSE	-0.0966055	7.2704	0.457915	0.711756	FALSE	-0.121572	7.48563	0.0859208	0.300254	FALSE	-0.166374	7.09836	0.100859	0.419629	FALSE	-0.210433	6.44369	0.0422049	0.223699	FALSE	-0.152111	6.79739	0.0757738	0.330944	FALSE	-0.129856	7.34152	0.254181	0.592083	FALSE	-0.405891	8.05935	0.00260855	0.0876123
ANKRD12	-0.260804	7.52101	0.0469955	0.212493	FALSE	-0.173325	8.29379	0.0381876	0.282373	FALSE	-0.117142	8.24483	0.341608	0.700478	FALSE	-0.162796	8.18276	0.127815	0.378969	FALSE	-0.0469196	8.41018	0.512179	0.728914	FALSE	-0.0744867	8.15528	0.475267	0.759445	FALSE	-0.155233	7.44786	0.158189	0.42012	FALSE	-0.123681	7.9635	0.242524	0.552472	FALSE	-0.0789801	8.41346	0.373271	0.684924	FALSE	-0.295286	9.12454	0.00911312	0.143235
ANKRD13A	-0.424909	4.25258	0.00581964	0.0803952	TRUE	-0.256101	4.87609	0.0333188	0.268922	FALSE	-0.249645	4.77956	0.102086	0.462446	FALSE	-0.128005	4.08002	0.369305	0.644859	FALSE	-0.394194	4.84398	0.000992944	0.0322774	TRUE	-0.211918	4.62685	0.115251	0.440363	FALSE	-0.350633	4.24636	0.0196486	0.160258	FALSE	-0.226269	4.63114	0.0892902	0.353527	FALSE	NA	NA	NA	NA	NA	NA	NA	NA	NA
ANKRD13C	-0.118857	4.32046	0.385865	0.618026	FALSE	0.0634886	5.30168	0.506188	0.78761	FALSE	-0.0109182	4.915	0.939793	0.984129	FALSE	-0.27448	4.25808	0.104804	0.341693	FALSE	-0.0965081	5.21105	0.284679	0.550368	FALSE	-0.0280071	4.96599	0.799751	0.927469	FALSE	-0.295498	4.27333	0.0295516	0.194022	FALSE	-0.135104	4.64191	0.264051	0.571986	FALSE	-0.143701	4.91053	0.419709	0.720644	FALSE	-0.0577273	5.40896	0.762951	0.894429
ANKRD13D	0.0661561	3.56461	0.614308	0.790988	FALSE	0.0043202	3.89713	0.975015	0.993651	FALSE	0.216617	3.44202	0.217895	0.59035	FALSE	-0.0507787	3.57428	0.706879	0.869669	FALSE	-0.0763013	3.73099	0.506826	0.724987	FALSE	-0.0577194	3.68793	0.740387	0.902439	FALSE	-0.111183	3.58243	0.440384	0.689603	FALSE	-0.00886894	3.43494	0.952897	0.984359	FALSE	NA	NA	NA	NA	NA	NA	NA	NA	NA
ANKRD16	NA	NA	NA	NA	NA	0.224212	1.77063	0.253644	0.594494	FALSE	NA	NA	NA	NA	NA	NA	NA	NA	NA	NA	NA	NA	NA	NA	NA	NA	NA	NA	NA	NA	NA	NA	NA	NA	NA	NA	NA	NA	NA	NA	NA	NA	NA	NA	NA	NA	NA	NA	NA
ANKRD17	-0.349879	6.39344	0.0231419	0.153123	FALSE	-0.132628	7.70446	0.0946099	0.406259	FALSE	-0.225134	7.302	0.0414844	0.32723	FALSE	-0.396254	7.13415	0.0107072	0.115916	FALSE	-0.159911	7.62122	0.0565212	0.242248	FALSE	-0.161168	7.23544	0.263367	0.604094	FALSE	-0.279714	6.37104	0.0322457	0.199397	FALSE	-0.185004	6.9228	0.151705	0.444825	FALSE	-0.243926	7.34446	0.0861225	0.371761	FALSE	-0.18651	7.39674	0.285721	0.605964
ANKRD26	-0.193708	3.41845	0.244193	0.487038	FALSE	0.0581198	4.28705	0.587799	0.833786	FALSE	0.0441001	4.2841	0.785374	0.93354	FALSE	-0.393903	3.38247	0.00838983	0.102521	FALSE	-0.227687	3.94524	0.0804842	0.289435	FALSE	0.0111197	3.92201	0.950638	0.985453	FALSE	-0.276175	3.46218	0.0871986	0.313519	FALSE	0.0078552	3.88447	0.95113	0.984359	FALSE	NA	NA	NA	NA	NA	NA	NA	NA	NA
ANKRD27	-0.109509	3.58876	0.442223	0.667027	FALSE	-0.00588168	4.4916	0.956297	0.987548	FALSE	-0.0128212	4.15205	0.938864	0.983868	FALSE	-0.210431	3.8611	0.295771	0.57661	FALSE	0.0710861	4.2275	0.530814	0.742989	FALSE	-0.0428966	4.15221	0.758847	0.910974	FALSE	-0.153493	3.52957	0.338686	0.606228	FALSE	-0.0499155	3.84467	0.761414	0.907371	FALSE	-0.267352	4.32566	0.193279	0.522033	FALSE	NA	NA	NA	NA
ANKRD28	-0.0459972	5.83055	0.806664	0.90409	FALSE	-0.113137	6.86365	0.435842	0.744011	FALSE	-0.157464	6.64314	0.449631	0.76941	FALSE	-0.201095	6.6396	0.162611	0.428854	FALSE	-0.00389741	7.06858	0.982677	0.991435	FALSE	-0.105019	6.55893	0.586775	0.821969	FALSE	-0.12928	5.70044	0.38564	0.645225	FALSE	-0.082481	5.97076	0.650541	0.849871	FALSE	-0.240681	6.52669	0.140023	0.463101	FALSE	-0.174626	6.09783	0.633243	0.829526
ANKRD29	-0.419804	2.37878	0.228275	0.471151	FALSE	-0.29933	2.6939	0.447827	0.752011	FALSE	-0.392836	2.14591	0.350948	0.706939	FALSE	NA	NA	NA	NA	NA	NA	NA	NA	NA	NA	NA	NA	NA	NA	NA	NA	NA	NA	NA	NA	NA	NA	NA	NA	NA	NA	NA	NA	NA	NA	NA	NA	NA	NA
ANKRD33B	NA	NA	NA	NA	NA	NA	NA	NA	NA	NA	NA	NA	NA	NA	NA	NA	NA	NA	NA	NA	NA	NA	NA	NA	NA	NA	NA	NA	NA	NA	NA	NA	NA	NA	NA	NA	NA	NA	NA	NA	NA	NA	NA	NA	NA	-0.154263	7.72466	0.517087	0.760781
ANKRD36	0.115014	2.71382	0.476001	0.694663	FALSE	0.514695	4.12133	0.000170631	0.0392859	TRUE	0.359275	3.56821	0.0746401	0.410157	FALSE	0.53452	3.63033	0.0345572	0.197523	FALSE	0.20053	3.6726	0.254851	0.521363	FALSE	0.474231	3.67496	0.00450307	0.128015	FALSE	0.440945	2.86865	0.0124571	0.134886	FALSE	NA	NA	NA	NA	NA	NA	NA	NA	NA	NA	NA	NA	NA	NA
ANKRD36B	NA	NA	NA	NA	NA	0.00880234	2.66286	0.965433	0.990398	FALSE	0.0943818	2.23944	0.770861	0.925508	FALSE	0.152416	2.32726	0.491508	0.736004	FALSE	NA	NA	NA	NA	NA	NA	NA	NA	NA	NA	NA	NA	NA	NA	NA	NA	NA	NA	NA	NA	NA	NA	NA	NA	NA	NA	NA	NA	NA
ANKRD36C	NA	NA	NA	NA	NA	0.0934895	3.44769	0.528527	0.800118	FALSE	-0.128426	2.89086	0.546629	0.824144	FALSE	-0.0234433	2.9992	0.911717	0.965517	FALSE	-0.284008	2.69587	0.160673	0.407673	FALSE	0.324904	3.23318	0.268675	0.609653	FALSE	NA	NA	NA	NA	NA	NA	NA	NA	NA	NA	NA	NA	NA	NA	NA	NA	NA	NA	NA
ANKRD37	0.415172	2.55634	0.146151	0.373634	FALSE	0.550622	2.25316	0.0501678	0.316653	FALSE	0.0665972	2.40129	0.860486	0.956368	FALSE	0.149483	3.82284	0.453867	0.708842	FALSE	0.422681	2.86283	0.101112	0.324193	FALSE	0.64906	2.90285	0.0967764	0.415328	FALSE	0.65071	2.52194	0.05879	0.259846	FALSE	NA	NA	NA	NA	NA	NA	NA	NA	NA	NA	NA	NA	NA	NA
ANKRD39	0.209486	4.05244	0.245672	0.488988	FALSE	0.0376196	3.75157	0.841597	0.945027	FALSE	0.10246	3.75541	0.680667	0.886276	FALSE	0.0456378	3.43917	0.81896	0.927969	FALSE	0.00136566	3.51167	0.993347	0.996557	FALSE	0.418577	4.00915	0.0295102	0.269371	FALSE	-0.0931351	3.99259	0.567842	0.780815	FALSE	-0.0314777	3.88719	0.835089	0.940195	FALSE	NA	NA	NA	NA	NA	NA	NA	NA	NA
ANKRD40	0.390699	4.4416	5.77103e-05	0.00879452	TRUE	0.234758	4.84484	0.00255935	0.097312	TRUE	0.355531	4.67275	0.000364165	0.0805566	TRUE	0.220718	4.46252	0.0656893	0.271591	FALSE	0.224126	4.73046	0.0226908	0.152465	FALSE	0.172592	4.81154	0.15005	0.484818	FALSE	0.273817	4.39718	0.00778827	0.109703	FALSE	0.437614	4.61502	1.82086e-05	0.00623237	TRUE	0.39854	4.95861	0.00465435	0.120637	FALSE	NA	NA	NA	NA
ANKRD42	-0.0349017	2.61558	0.752617	0.871951	FALSE	-0.122339	3.23036	0.267579	0.607137	FALSE	-0.207414	2.79283	0.192869	0.563124	FALSE	-0.0441862	3.30676	0.796106	0.916672	FALSE	-0.443586	2.76969	0.0141085	0.124658	FALSE	-0.0697733	3.10543	0.714513	0.889167	FALSE	-0.31254	2.60639	0.0143632	0.141733	FALSE	NA	NA	NA	NA	NA	NA	NA	NA	NA	NA	NA	NA	NA	NA
ANKRD44	-0.455534	4.61923	0.0202246	0.143019	FALSE	-0.221831	6.0204	0.164468	0.501573	FALSE	-0.254312	5.52439	0.18177	0.554059	FALSE	-0.289748	5.36909	0.0677174	0.275725	FALSE	-0.277206	6.06033	0.0748699	0.27947	FALSE	-0.348545	5.4395	0.0257523	0.257917	FALSE	-0.220128	4.70653	0.258001	0.532923	FALSE	-0.287131	5.36717	0.138324	0.425588	FALSE	-0.410258	5.428	0.0612837	0.327678	FALSE	-0.285382	6.75261	0.137389	0.449765
ANKRD46	-0.03859	1.76115	0.827815	0.916942	FALSE	0.0198042	2.54354	0.869792	0.954905	FALSE	0.035231	2.16319	0.849482	0.952398	FALSE	NA	NA	NA	NA	NA	0.0132283	2.1977	0.926716	0.968829	FALSE	NA	NA	NA	NA	NA	NA	NA	NA	NA	NA	NA	NA	NA	NA	NA	NA	NA	NA	NA	NA	NA	NA	NA	NA
ANKRD49	0.687566	4.24735	0.000187311	0.0163342	TRUE	0.450834	4.24892	0.00161096	0.0845044	TRUE	0.359465	4.24435	0.0486648	0.346077	FALSE	0.398494	3.8688	0.0590554	0.257102	FALSE	0.519415	4.43831	0.000115105	0.0104485	TRUE	0.502572	4.3757	0.000589542	0.0634067	TRUE	0.383014	4.24855	0.0062308	0.0994987	TRUE	0.511466	4.31368	0.00123733	0.0466246	TRUE	0.315192	4.58988	0.0979842	0.391125	FALSE	NA	NA	NA	NA
ANKRD50	0.0721216	2.49615	0.712685	0.851838	FALSE	-0.12337	3.28555	0.415239	0.72915	FALSE	-0.422369	3.00066	0.0500411	0.348408	FALSE	0.168117	3.45169	0.37111	0.646347	FALSE	-0.221287	3.32674	0.16379	0.412097	FALSE	-0.129701	3.07064	0.558731	0.80802	FALSE	NA	NA	NA	NA	NA	NA	NA	NA	NA	NA	NA	NA	NA	NA	NA	NA	NA	NA	NA
ANKRD52	0.0163872	2.57384	0.912069	0.958641	FALSE	0.0585566	3.27707	0.579841	0.829429	FALSE	0.103222	3.21689	0.52577	0.810889	FALSE	0.0589076	2.58741	0.779942	0.909367	FALSE	0.0532665	3.29986	0.688867	0.845268	FALSE	0.20129	3.22322	0.173048	0.50948	FALSE	0.0454749	2.71283	0.715935	0.865775	FALSE	NA	NA	NA	NA	NA	NA	NA	NA	NA	NA	NA	NA	NA	NA
ANKRD54	0.21933	2.78815	0.0658601	0.24883	FALSE	0.213172	3.10037	0.0334903	0.268922	FALSE	0.241054	2.96702	0.0998767	0.459687	FALSE	0.119063	3.03924	0.492176	0.736433	FALSE	0.199476	2.95306	0.148117	0.392071	FALSE	0.227743	3.25046	0.226798	0.564472	FALSE	0.106518	2.75776	0.396587	0.654151	FALSE	NA	NA	NA	NA	NA	NA	NA	NA	NA	NA	NA	NA	NA	NA
ANKRD6	-0.138982	3.34435	0.462766	0.68322	FALSE	-0.0747331	4.77446	0.60332	0.844049	FALSE	-0.0676374	4.1655	0.713645	0.901858	FALSE	-0.340782	3.75259	0.138439	0.394937	FALSE	-0.111146	4.04738	0.553353	0.759864	FALSE	-0.202525	4.22997	0.192818	0.532164	FALSE	-0.234729	3.28869	0.208443	0.478253	FALSE	-0.2981	3.72343	0.121754	0.401488	FALSE	NA	NA	NA	NA	NA	NA	NA	NA	NA
ANKRD9	0.112987	2.83043	0.582564	0.770947	FALSE	-0.258111	2.409	0.123204	0.45057	FALSE	-0.13905	2.3233	0.444175	0.766668	FALSE	0.213351	2.24483	0.270359	0.556102	FALSE	-0.0640051	2.34209	0.733693	0.874722	FALSE	0.103176	2.80241	0.606755	0.832167	FALSE	0.0133056	2.82014	0.946355	0.980253	FALSE	NA	NA	NA	NA	NA	NA	NA	NA	NA	NA	NA	NA	NA	NA
ANKS1A	-0.539353	4.90543	0.0015074	0.045236	TRUE	-0.00886197	6.32122	0.946513	0.984727	FALSE	-0.264028	5.35831	0.0926367	0.449666	FALSE	-0.361236	5.16044	0.0365191	0.2019	FALSE	-0.291511	5.34495	0.0239259	0.157348	FALSE	-0.357223	5.57634	0.0258043	0.258156	FALSE	-0.434533	4.79187	0.00580377	0.0952978	TRUE	-0.36517	5.27507	0.00813642	0.116012	FALSE	-0.42237	5.41576	0.0396422	0.276514	FALSE	NA	NA	NA	NA
ANKS3	-0.281389	2.33921	0.0889646	0.288839	FALSE	0.100359	3.19308	0.35249	0.682509	FALSE	0.148098	2.83036	0.42771	0.756265	FALSE	-0.152437	2.14223	0.494065	0.738116	FALSE	-0.12831	3.0179	0.380156	0.630481	FALSE	-0.280502	3.03012	0.135747	0.466428	FALSE	NA	NA	NA	NA	NA	NA	NA	NA	NA	NA	NA	NA	NA	NA	NA	NA	NA	NA	NA
ANKUB1	-0.350459	5.26793	0.225147	0.468066	FALSE	-0.209751	6.6889	0.198182	0.53981	FALSE	-0.277545	6.37167	0.185567	0.55481	FALSE	-0.485828	6.52499	0.0335037	0.195199	FALSE	0.0911748	6.81238	0.549361	0.756717	FALSE	-0.289111	6.53835	0.194064	0.534453	FALSE	-0.325513	5.18245	0.200821	0.471828	FALSE	-0.302649	5.90458	0.177977	0.477527	FALSE	-0.202787	6.84589	0.373866	0.68504	FALSE	NA	NA	NA	NA
ANKZF1	-0.160516	1.71611	0.421111	0.64996	FALSE	0.0871372	2.02611	0.626551	0.854624	FALSE	0.450388	1.83002	0.043691	0.333586	FALSE	NA	NA	NA	NA	NA	NA	NA	NA	NA	NA	NA	NA	NA	NA	NA	NA	NA	NA	NA	NA	NA	NA	NA	NA	NA	NA	NA	NA	NA	NA	NA	NA	NA	NA
ANO10	-0.0298975	5.12807	0.833468	0.920236	FALSE	0.19125	6.0765	0.101697	0.418329	FALSE	0.0382523	5.48466	0.810775	0.943036	FALSE	0.180208	5.58144	0.219645	0.498696	FALSE	-0.145353	5.55964	0.276361	0.542019	FALSE	-0.0161543	5.68716	0.909542	0.97318	FALSE	0.0132931	5.07378	0.921921	0.967378	FALSE	-0.0743664	5.35608	0.517654	0.774881	FALSE	-0.0254898	5.88872	0.92777	0.974978	FALSE	NA	NA	NA	NA
ANO5	-0.0634744	7.71292	0.807988	0.904846	FALSE	0.158024	9.15534	0.496952	0.783101	FALSE	-0.135316	8.14585	0.637726	0.863484	FALSE	-0.00303314	8.25765	0.984676	0.993447	FALSE	-0.659176	6.68562	0.072832	0.276411	FALSE	-0.0386424	8.52938	0.876333	0.958395	FALSE	-0.123924	7.45909	0.577451	0.78681	FALSE	-0.09527	7.82864	0.714158	0.881365	FALSE	0.0824963	8.48302	0.693535	0.882604	FALSE	NA	NA	NA	NA
ANO6	-0.0677444	5.12294	0.615214	0.791742	FALSE	0.0966145	6.10396	0.180404	0.519811	FALSE	0.0622236	6.11566	0.613855	0.853656	FALSE	-0.146173	5.96906	0.329746	0.609958	FALSE	0.126299	6.97137	0.273618	0.539167	FALSE	0.0405974	5.88904	0.730819	0.897888	FALSE	0.0336169	5.32258	0.802088	0.915367	FALSE	0.0164627	5.81245	0.886609	0.962215	FALSE	-0.0709465	5.97787	0.611596	0.840218	FALSE	-0.0635016	7.38455	0.721553	0.874223
ANOS1	-0.392245	4.77539	0.0491119	0.216247	FALSE	-0.404092	5.53851	0.0724502	0.365523	FALSE	-0.367265	5.0297	0.104107	0.465092	FALSE	-0.159457	4.25614	0.322154	0.603449	FALSE	-1.04503	3.63291	0.00127088	0.036394	TRUE	-0.738227	4.79035	0.00405305	0.12366	FALSE	-0.552583	4.73485	0.00570846	0.0949848	TRUE	-0.399737	5.05167	0.0399213	0.244677	FALSE	NA	NA	NA	NA	NA	NA	NA	NA	NA
ANP32A	0.16911	5.90799	0.210111	0.45328	FALSE	0.0285723	5.86271	0.800155	0.928257	FALSE	0.104269	5.68409	0.457989	0.774169	FALSE	0.107735	5.62185	0.4995	0.741986	FALSE	-0.0349306	5.64137	0.711613	0.860735	FALSE	0.0531233	5.77663	0.723763	0.894457	FALSE	0.0398382	5.79799	0.74868	0.885216	FALSE	0.0636611	5.85156	0.605156	0.826253	FALSE	0.142077	5.75578	0.356535	0.670825	FALSE	-0.0795321	6.36904	0.731246	0.880166
ANP32B	0.0802977	7.13349	0.523472	0.727786	FALSE	0.0136648	7.06895	0.881023	0.95848	FALSE	0.0805004	7.02245	0.452561	0.770859	FALSE	0.0154485	7.01725	0.895573	0.958309	FALSE	-0.0109904	7.13695	0.888847	0.950276	FALSE	0.0329946	7.1345	0.790744	0.923716	FALSE	-0.0102196	7.14315	0.915803	0.965487	FALSE	0.0344946	7.04925	0.694835	0.869514	FALSE	-0.0481517	7.28328	0.649102	0.859237	FALSE	0.0633961	7.13748	0.658805	0.840978
ANP32E	-0.0656403	4.73351	0.62755	0.799437	FALSE	-0.145919	4.76411	0.197641	0.539109	FALSE	-0.104948	4.7394	0.447364	0.768252	FALSE	0.0204756	4.8721	0.896443	0.958602	FALSE	-0.115471	4.95698	0.256722	0.522823	FALSE	-0.0108901	4.77751	0.933918	0.981105	FALSE	-0.185598	4.65532	0.0870146	0.31334	FALSE	-0.164095	4.68938	0.146321	0.437664	FALSE	-0.243818	4.75751	0.200689	0.530158	FALSE	-0.247406	5.79995	0.237128	0.565191
ANPEP	0.660381	6.27304	0.00475533	0.0735308	TRUE	0.519497	6.78347	0.0109623	0.169447	FALSE	0.541342	6.92711	0.00782177	0.187241	FALSE	-0.015895	5.99162	0.951755	0.982051	FALSE	0.28972	7.77427	0.0646689	0.259561	FALSE	0.343635	6.35009	0.157317	0.494257	FALSE	0.354676	6.61331	0.038888	0.215056	FALSE	0.623988	6.70315	0.000171472	0.0195585	TRUE	0.687823	6.57996	0.00606057	0.133534	FALSE	NA	NA	NA	NA
ANTKMT	0.0195871	5.60987	0.907069	0.955898	FALSE	-0.103673	5.15493	0.515867	0.793198	FALSE	0.0525598	5.22749	0.770369	0.925241	FALSE	-0.0754949	4.88631	0.692564	0.862934	FALSE	-0.188047	4.94582	0.184184	0.438235	FALSE	-0.0392473	5.15363	0.847489	0.945222	FALSE	-0.145501	5.64777	0.321205	0.59084	FALSE	-0.0279588	5.42876	0.847298	0.946959	FALSE	-0.206678	4.60423	0.368605	0.680465	FALSE	NA	NA	NA	NA
ANTXR2	NA	NA	NA	NA	NA	-0.158173	2.54282	0.681234	0.879994	FALSE	0.181265	3.50997	0.667185	0.877583	FALSE	-0.275147	3.13031	0.350508	0.631425	FALSE	0.103079	6.55715	0.584225	0.782382	FALSE	NA	NA	NA	NA	NA	NA	NA	NA	NA	NA	0.0427709	3.67416	0.894582	0.964373	FALSE	NA	NA	NA	NA	NA	0.212872	8.81436	0.321315	0.628454
ANXA1	0.543427	11.5751	0.0147937	0.123003	FALSE	0.261812	11.202	0.169467	0.506638	FALSE	0.446364	11.2864	0.0489457	0.346722	FALSE	0.517984	12.0763	0.00782902	0.0988679	TRUE	0.208401	11.4568	0.202604	0.4613	FALSE	0.650893	11.5163	0.00605503	0.140373	FALSE	0.378084	11.4287	0.0294125	0.193399	FALSE	0.475825	11.4519	0.00760104	0.112246	FALSE	0.338022	12.741	0.0235318	0.229007	FALSE	0.520376	9.46207	0.0573777	0.31034
ANXA11	0.000757175	7.30306	0.996412	0.998423	FALSE	-0.0629644	7.34131	0.635652	0.858967	FALSE	-0.111759	6.90049	0.460958	0.776183	FALSE	0.0615341	6.90782	0.565123	0.784879	FALSE	-0.10435	7.33711	0.373909	0.62597	FALSE	0.087269	7.1086	0.464755	0.752898	FALSE	-0.0789743	7.22703	0.567171	0.780241	FALSE	0.116266	7.22135	0.356092	0.66036	FALSE	-0.0072586	7.1094	0.952118	0.982371	FALSE	-0.0642825	6.81663	0.692123	0.862266
ANXA2	0.158716	10.785	0.331269	0.571836	FALSE	-0.0216263	10.4012	0.852862	0.950478	FALSE	0.0926415	10.5278	0.526448	0.810889	FALSE	0.114732	10.3632	0.359466	0.63675	FALSE	0.0137007	10.5305	0.897597	0.955198	FALSE	0.149223	10.4902	0.279648	0.619534	FALSE	-0.115006	10.7478	0.426361	0.675781	FALSE	0.00998087	10.6731	0.92839	0.97571	FALSE	0.0656703	10.7238	0.588339	0.825989	FALSE	-0.013498	10.1385	0.919254	0.964769
ANXA4	-0.289167	7.25705	0.0240733	0.155077	FALSE	-0.300268	7.48296	0.00203146	0.0889297	TRUE	-0.280095	7.30474	0.0298216	0.296708	FALSE	-0.360216	6.68252	0.00646586	0.0922851	TRUE	-0.398525	7.29624	0.000138899	0.0117175	TRUE	-0.249577	7.23363	0.0267158	0.261169	FALSE	-0.420431	7.25219	0.000130545	0.0159084	TRUE	-0.312745	7.53466	0.000376729	0.0267543	TRUE	-0.259798	7.10409	0.0358981	0.266534	FALSE	-0.527888	6.21044	0.0167417	0.184423
ANXA5	0.103866	11.2247	0.425992	0.653974	FALSE	0.0277353	11.0259	0.797172	0.927885	FALSE	0.161996	11.2288	0.218324	0.590489	FALSE	0.0962657	10.9828	0.366761	0.642948	FALSE	0.173565	11.3283	0.0940249	0.312939	FALSE	0.176594	11.1398	0.218473	0.556124	FALSE	0.0696918	11.221	0.503264	0.735889	FALSE	0.139057	11.2206	0.156019	0.44915	FALSE	0.200863	11.4154	0.100079	0.395112	FALSE	0.21427	9.91184	0.219783	0.543669
ANXA6	NA	NA	NA	NA	NA	NA	NA	NA	NA	NA	NA	NA	NA	NA	NA	NA	NA	NA	NA	NA	NA	NA	NA	NA	NA	NA	NA	NA	NA	NA	NA	NA	NA	NA	NA	NA	NA	NA	NA	NA	NA	NA	NA	NA	NA	-0.0725104	6.89281	0.792412	0.909594
ANXA7	-0.0060177	6.85052	0.965897	0.983853	FALSE	0.00684183	6.8236	0.93779	0.980509	FALSE	0.125597	6.97249	0.32694	0.690785	FALSE	-0.14686	6.24457	0.232783	0.513006	FALSE	-0.0410906	6.93582	0.620359	0.804135	FALSE	-0.0432772	6.86624	0.674651	0.868482	FALSE	-0.147463	6.81857	0.131313	0.381369	FALSE	0.00927321	6.93027	0.895332	0.964645	FALSE	-0.13143	6.72536	0.351912	0.665944	FALSE	-0.190406	7.6985	0.162078	0.477754
AOAH	0.289421	3.28675	0.229272	0.472102	FALSE	0.257045	4.01848	0.326234	0.66054	FALSE	0.257397	3.86284	0.312834	0.679962	FALSE	0.474631	2.89723	0.0617746	0.262488	FALSE	0.281274	3.8268	0.27513	0.540597	FALSE	0.0593013	3.45625	0.792979	0.924487	FALSE	0.264464	3.3869	0.248856	0.524432	FALSE	0.606772	3.82077	0.0161712	0.159405	FALSE	NA	NA	NA	NA	NA	NA	NA	NA	NA
AOC2	0.615504	3.2124	0.00264095	0.0569849	TRUE	0.441641	3.04889	0.0136951	0.186433	FALSE	0.472251	3.21317	0.0153274	0.233623	FALSE	0.306736	3.5774	0.0938375	0.325396	FALSE	NA	NA	NA	NA	NA	0.449575	3.37117	0.0490888	0.325793	FALSE	0.497153	3.14111	0.0132113	0.137787	FALSE	NA	NA	NA	NA	NA	NA	NA	NA	NA	NA	NA	NA	NA	NA
AOC3	0.303614	3.54089	0.489134	0.703259	FALSE	0.0873196	3.6306	0.813922	0.933753	FALSE	0.0750881	3.29329	0.863539	0.957648	FALSE	0.200965	3.14119	0.553794	0.777195	FALSE	NA	NA	NA	NA	NA	0.341546	3.55784	0.354169	0.677753	FALSE	-0.00225708	3.24649	0.995831	0.998746	FALSE	NA	NA	NA	NA	NA	NA	NA	NA	NA	NA	NA	NA	NA	NA
AOPEP	-0.114444	3.1062	0.656517	0.818323	FALSE	0.362683	4.73638	0.019197	0.216293	FALSE	0.468937	4.22486	0.0864877	0.438932	FALSE	-0.229512	2.92447	0.222125	0.500794	FALSE	-0.155391	4.45971	0.340335	0.600321	FALSE	0.101355	4.04629	0.736772	0.901063	FALSE	-0.297027	3.37077	0.176262	0.44451	FALSE	0.100481	3.838	0.688565	0.866883	FALSE	NA	NA	NA	NA	NA	NA	NA	NA	NA
AP000240.1	NA	NA	NA	NA	NA	-0.206112	2.48626	0.196003	0.537373	FALSE	-0.190795	2.19724	0.319037	0.68421	FALSE	NA	NA	NA	NA	NA	-0.216925	2.54044	0.214863	0.478641	FALSE	NA	NA	NA	NA	NA	NA	NA	NA	NA	NA	NA	NA	NA	NA	NA	NA	NA	NA	NA	NA	NA	NA	NA	NA
AP000331.1	-0.383458	4.98162	0.284186	0.52997	FALSE	-0.173985	6.4969	0.504924	0.787429	FALSE	-0.0573014	5.78368	0.829748	0.946882	FALSE	-0.526083	5.28995	0.0829602	0.306505	FALSE	0.0850132	6.6148	0.67748	0.839249	FALSE	-0.325968	5.78577	0.213549	0.550929	FALSE	-0.329189	4.7218	0.253781	0.529147	FALSE	-0.187581	5.61101	0.437954	0.717426	FALSE	-0.422113	5.9619	0.111363	0.418518	FALSE	NA	NA	NA	NA
AP000442.1	NA	NA	NA	NA	NA	-0.0937909	2.1437	0.537957	0.804422	FALSE	NA	NA	NA	NA	NA	NA	NA	NA	NA	NA	NA	NA	NA	NA	NA	NA	NA	NA	NA	NA	NA	NA	NA	NA	NA	NA	NA	NA	NA	NA	NA	NA	NA	NA	NA	NA	NA	NA	NA
AP000547.3	0.190579	3.19604	0.513553	0.720466	FALSE	0.0433925	3.53315	0.870598	0.955395	FALSE	0.0673486	2.99761	0.85509	0.953925	FALSE	0.141704	3.34634	0.562945	0.783185	FALSE	NA	NA	NA	NA	NA	-0.082093	3.59617	0.70783	0.886366	FALSE	-0.0244634	3.05508	0.923972	0.968639	FALSE	NA	NA	NA	NA	NA	NA	NA	NA	NA	NA	NA	NA	NA	NA
AP000695.1	NA	NA	NA	NA	NA	NA	NA	NA	NA	NA	NA	NA	NA	NA	NA	NA	NA	NA	NA	NA	0.0853214	2.28915	0.678459	0.839249	FALSE	NA	NA	NA	NA	NA	NA	NA	NA	NA	NA	NA	NA	NA	NA	NA	NA	NA	NA	NA	NA	NA	NA	NA	NA
AP000763.3	-1.1545	1.83564	1.55322e-06	0.00145407	TRUE	-0.659181	3.00478	0.000629553	0.0635009	TRUE	-0.775496	2.90644	0.000410962	0.0805566	TRUE	-0.597551	2.9189	0.00672136	0.0931731	TRUE	-0.664677	2.95937	0.000543101	0.0230208	TRUE	NA	NA	NA	NA	NA	NA	NA	NA	NA	NA	NA	NA	NA	NA	NA	NA	NA	NA	NA	NA	NA	NA	NA	NA
AP000779.1	-0.463477	1.86805	0.0703568	0.25478	FALSE	-0.677663	3.22087	0.00125456	0.0804799	TRUE	-0.517647	3.46607	0.0435096	0.333586	FALSE	-0.379152	3.14983	0.140195	0.397148	FALSE	-0.224732	3.11841	0.329362	0.59122	FALSE	NA	NA	NA	NA	NA	NA	NA	NA	NA	NA	NA	NA	NA	NA	NA	NA	NA	NA	NA	NA	NA	NA	NA	NA
AP000873.2	NA	NA	NA	NA	NA	-0.0139504	3.03588	0.911499	0.970317	FALSE	-0.0206988	2.7577	0.91371	0.976061	FALSE	-0.0387868	2.46603	0.802818	0.919493	FALSE	-0.259389	2.89777	0.0604709	0.250104	FALSE	0.113963	2.76124	0.597046	0.826623	FALSE	NA	NA	NA	NA	NA	NA	NA	NA	NA	NA	NA	NA	NA	NA	NA	NA	NA	NA	NA
AP001011.1	0.0981897	2.60719	0.669802	0.825873	FALSE	0.06724	3.97655	0.636479	0.859705	FALSE	0.109498	3.69252	0.529904	0.812778	FALSE	0.40731	3.97339	0.0682715	0.276874	FALSE	0.338758	4.4542	0.0378356	0.196619	FALSE	0.323057	3.81992	0.146326	0.478232	FALSE	NA	NA	NA	NA	NA	-0.120821	3.78241	0.581999	0.813121	FALSE	NA	NA	NA	NA	NA	-0.536846	5.67611	0.0799483	0.35484
AP001021.3	NA	NA	NA	NA	NA	0.277338	2.22897	0.294623	0.634605	FALSE	NA	NA	NA	NA	NA	NA	NA	NA	NA	NA	NA	NA	NA	NA	NA	NA	NA	NA	NA	NA	NA	NA	NA	NA	NA	NA	NA	NA	NA	NA	NA	NA	NA	NA	NA	NA	NA	NA	NA
AP001610.2	NA	NA	NA	NA	NA	NA	NA	NA	NA	NA	NA	NA	NA	NA	NA	NA	NA	NA	NA	NA	NA	NA	NA	NA	NA	NA	NA	NA	NA	NA	NA	NA	NA	NA	NA	0.3455	3.53093	0.239193	0.547271	FALSE	NA	NA	NA	NA	NA	NA	NA	NA	NA
AP001831.1	-0.00875243	1.76144	0.974091	0.987455	FALSE	0.40839	3.19871	0.0508302	0.317232	FALSE	-0.131279	2.13163	0.668433	0.878087	FALSE	0.354164	2.66711	0.0726903	0.286312	FALSE	NA	NA	NA	NA	NA	NA	NA	NA	NA	NA	NA	NA	NA	NA	NA	NA	NA	NA	NA	NA	NA	NA	NA	NA	NA	NA	NA	NA	NA
AP002336.2	0.00222044	4.51069	0.988117	0.994378	FALSE	-0.139314	5.34998	0.245884	0.587582	FALSE	-0.152532	4.90441	0.412281	0.746145	FALSE	0.159129	5.9956	0.340659	0.619579	FALSE	0.0500177	5.16115	0.692511	0.847407	FALSE	-0.0605801	5.06973	0.688052	0.875638	FALSE	-0.0301087	4.3842	0.829137	0.928951	FALSE	-0.149875	4.78934	0.340535	0.646553	FALSE	0.129398	5.61273	0.42929	0.724874	FALSE	NA	NA	NA	NA
AP002381.2	-0.224478	2.85839	0.159099	0.391149	FALSE	-0.261781	3.91443	0.0909694	0.397255	FALSE	-0.123055	3.30186	0.535367	0.817393	FALSE	-0.0456583	4.52221	0.790529	0.91475	FALSE	-0.270729	3.80283	0.110495	0.336984	FALSE	-0.43711	3.72314	0.0243697	0.252214	FALSE	-0.192748	2.69717	0.243384	0.520173	FALSE	NA	NA	NA	NA	NA	NA	NA	NA	NA	NA	NA	NA	NA	NA
AP002495.1	NA	NA	NA	NA	NA	0.123947	2.21459	0.455669	0.757878	FALSE	0.311593	1.79111	0.236007	0.606859	FALSE	NA	NA	NA	NA	NA	NA	NA	NA	NA	NA	NA	NA	NA	NA	NA	NA	NA	NA	NA	NA	NA	NA	NA	NA	NA	NA	NA	NA	NA	NA	NA	NA	NA	NA
AP002762.2	-0.0255556	2.29498	0.931118	0.967214	FALSE	-0.0477718	3.6797	0.826838	0.938288	FALSE	0.130712	3.09101	0.676463	0.883146	FALSE	-0.305501	3.02264	0.140281	0.397148	FALSE	-0.181807	2.97443	0.438091	0.674444	FALSE	-0.018576	3.09577	0.944111	0.98433	FALSE	NA	NA	NA	NA	NA	NA	NA	NA	NA	NA	NA	NA	NA	NA	NA	NA	NA	NA	NA
AP002807.1	NA	NA	NA	NA	NA	-0.101181	1.93595	0.488637	0.778575	FALSE	NA	NA	NA	NA	NA	NA	NA	NA	NA	NA	0.0540152	2.13482	0.74049	0.878608	FALSE	NA	NA	NA	NA	NA	NA	NA	NA	NA	NA	NA	NA	NA	NA	NA	NA	NA	NA	NA	NA	NA	NA	NA	NA
AP002812.2	NA	NA	NA	NA	NA	-0.237673	2.57986	0.0826804	0.38249	FALSE	-0.0328574	2.19595	0.883151	0.966	FALSE	-0.308486	2.7859	0.155496	0.418513	FALSE	-0.191951	2.26642	0.31609	0.579207	FALSE	NA	NA	NA	NA	NA	NA	NA	NA	NA	NA	NA	NA	NA	NA	NA	NA	NA	NA	NA	NA	NA	NA	NA	NA
AP003086.1	-0.205346	4.0481	0.397783	0.6297	FALSE	-0.324383	5.27837	0.0286445	0.251763	FALSE	-0.318014	5.2794	0.153753	0.526922	FALSE	-0.164013	5.48249	0.383211	0.655592	FALSE	-0.0376133	5.22965	0.827678	0.924104	FALSE	-0.150415	4.99749	0.443864	0.737548	FALSE	-0.0892588	4.08366	0.703686	0.859862	FALSE	-0.172088	4.61428	0.418818	0.700868	FALSE	-0.323838	5.45787	0.108991	0.412554	FALSE	-0.269457	6.46488	0.299729	0.616579
AP003557.1	NA	NA	NA	NA	NA	-0.185954	1.98206	0.376146	0.701243	FALSE	NA	NA	NA	NA	NA	NA	NA	NA	NA	NA	NA	NA	NA	NA	NA	NA	NA	NA	NA	NA	NA	NA	NA	NA	NA	NA	NA	NA	NA	NA	NA	NA	NA	NA	NA	NA	NA	NA	NA
AP006621.3	NA	NA	NA	NA	NA	-0.200167	1.96171	0.195411	0.536999	FALSE	NA	NA	NA	NA	NA	NA	NA	NA	NA	NA	NA	NA	NA	NA	NA	NA	NA	NA	NA	NA	NA	NA	NA	NA	NA	NA	NA	NA	NA	NA	NA	NA	NA	NA	NA	NA	NA	NA	NA
AP1AR	-0.356694	4.91819	0.0108851	0.105774	FALSE	-0.217813	5.41773	0.051407	0.317649	FALSE	-0.121793	5.15759	0.398445	0.738368	FALSE	-0.235068	5.08996	0.0604208	0.259939	FALSE	-0.187348	5.27163	0.102386	0.326011	FALSE	-0.242122	5.23382	0.0659356	0.356659	FALSE	-0.25468	4.90497	0.0411607	0.220914	FALSE	-0.133191	5.23264	0.288657	0.59627	FALSE	-0.483433	5.39308	0.00292443	0.103701	FALSE	NA	NA	NA	NA
AP1B1	-0.0881609	4.60256	0.48882	0.703054	FALSE	-0.0750788	5.08242	0.550422	0.809992	FALSE	-0.162072	5.04926	0.243865	0.614906	FALSE	-0.0814631	4.51866	0.504298	0.745985	FALSE	-0.216797	4.97861	0.0767471	0.282827	FALSE	-0.136864	4.7591	0.265254	0.606366	FALSE	-0.253428	4.66854	0.0567943	0.255511	FALSE	-0.0794048	4.86852	0.513745	0.77123	FALSE	NA	NA	NA	NA	NA	NA	NA	NA	NA
AP1G1	-0.178973	5.32308	0.0497339	0.217086	FALSE	-0.118522	6.00038	0.119958	0.446408	FALSE	-0.139909	5.789	0.121731	0.487116	FALSE	-0.156213	5.66075	0.169345	0.437596	FALSE	-0.136343	6.10441	0.077958	0.28478	FALSE	-0.0867823	5.74204	0.270522	0.610892	FALSE	-0.290968	5.23424	0.000982383	0.0398759	TRUE	-0.126112	5.61591	0.140938	0.428014	FALSE	-0.154722	5.8451	0.252355	0.59144	FALSE	-0.234145	6.15841	0.161707	0.477245
AP1G2	0.0502823	2.71875	0.718647	0.855238	FALSE	-0.0297981	2.86295	0.790739	0.923912	FALSE	-0.0239947	2.74717	0.875436	0.963411	FALSE	0.210464	2.15405	0.329976	0.61009	FALSE	-0.13777	2.54324	0.359864	0.614455	FALSE	0.0290494	2.64532	0.901472	0.96885	FALSE	-0.249718	2.92076	0.115098	0.354483	FALSE	NA	NA	NA	NA	NA	NA	NA	NA	NA	NA	NA	NA	NA	NA
AP1M1	0.187526	3.77546	0.065459	0.248607	FALSE	0.135077	4.27134	0.114575	0.437624	FALSE	0.167838	4.12511	0.172912	0.547343	FALSE	0.12972	3.88175	0.436298	0.696548	FALSE	0.0112951	4.31984	0.898111	0.955221	FALSE	0.127625	4.12685	0.344363	0.671801	FALSE	0.0704592	3.78535	0.55628	0.773021	FALSE	0.18275	4.03578	0.153227	0.446177	FALSE	-0.175409	4.33625	0.338661	0.655766	FALSE	NA	NA	NA	NA
AP1S1	0.229795	5.10775	0.138128	0.363639	FALSE	0.105611	4.64729	0.406167	0.725416	FALSE	0.168628	4.6346	0.348541	0.704757	FALSE	0.164076	4.35748	0.328291	0.608675	FALSE	0.181171	4.56737	0.222853	0.488561	FALSE	0.303332	4.67536	0.03108	0.273111	FALSE	0.0290004	4.99499	0.849414	0.938663	FALSE	0.185837	4.88377	0.162789	0.459541	FALSE	NA	NA	NA	NA	NA	NA	NA	NA	NA
AP1S2	0.359122	5.88768	0.0235364	0.153648	FALSE	0.227552	5.68461	0.100839	0.417287	FALSE	0.204097	6.22457	0.218225	0.59047	FALSE	0.267209	5.72534	0.0324855	0.192402	FALSE	0.202453	6.73988	0.106808	0.333889	FALSE	0.11657	5.73029	0.455387	0.747449	FALSE	0.114288	6.07668	0.394666	0.652712	FALSE	0.119996	5.96253	0.409914	0.694529	FALSE	0.294758	5.83019	0.0217183	0.223366	FALSE	0.212033	6.61179	0.21843	0.541593
AP1S3	0.183169	3.61995	0.475315	0.693902	FALSE	-0.0300363	4.64542	0.862962	0.953436	FALSE	-0.171742	4.83899	0.516294	0.806145	FALSE	0.206474	5.15155	0.440923	0.69953	FALSE	0.114271	4.6392	0.552584	0.759241	FALSE	0.292805	4.65655	0.169825	0.507816	FALSE	0.492572	3.69834	0.0265691	0.183854	FALSE	0.351416	4.197	0.181544	0.48181	FALSE	0.46049	4.67865	0.149186	0.477726	FALSE	-0.24269	5.47209	0.53624	0.773364
AP2A1	0.0458736	4.48259	0.691876	0.839534	FALSE	0.0340667	4.94152	0.743143	0.905594	FALSE	0.0942142	4.85917	0.492333	0.792735	FALSE	-0.0454579	4.00336	0.791797	0.914911	FALSE	0.0623136	5.12151	0.493827	0.715566	FALSE	-0.0791837	4.5558	0.497389	0.774974	FALSE	-0.237533	4.50702	0.0587232	0.259846	FALSE	0.040204	4.65536	0.777653	0.915345	FALSE	NA	NA	NA	NA	NA	NA	NA	NA	NA
AP2A2	0.198553	4.67961	0.217582	0.459058	FALSE	0.181862	5.37405	0.0929304	0.402217	FALSE	0.159123	5.07752	0.356883	0.711488	FALSE	0.0476258	4.75742	0.752497	0.895096	FALSE	0.0835833	5.28924	0.498366	0.717994	FALSE	0.174789	5.0419	0.222673	0.560326	FALSE	0.135358	4.66027	0.359783	0.62373	FALSE	0.184468	4.89356	0.198012	0.500276	FALSE	0.0219672	5.12228	0.91176	0.968623	FALSE	NA	NA	NA	NA
AP2B1	0.30121	6.11119	0.139767	0.366346	FALSE	0.176047	6.63134	0.240057	0.580335	FALSE	0.212469	6.48882	0.25136	0.623727	FALSE	-0.0358935	6.22726	0.816124	0.927107	FALSE	0.20644	6.68156	0.120381	0.353715	FALSE	0.0567382	6.47903	0.726359	0.896338	FALSE	0.168818	6.05563	0.330535	0.598408	FALSE	0.161497	6.38304	0.320902	0.627373	FALSE	-0.0341619	6.62855	0.871069	0.954823	FALSE	-0.0711073	6.72983	0.674394	0.849498
AP2M1	0.00959468	7.19249	0.94287	0.972988	FALSE	-0.0843001	6.88242	0.366993	0.692971	FALSE	0.013936	6.94592	0.908568	0.974034	FALSE	-0.00604045	6.5914	0.962183	0.985039	FALSE	-0.122458	6.92973	0.142619	0.385254	FALSE	0.00780086	6.89756	0.952006	0.985989	FALSE	-0.185991	7.12852	0.109178	0.345397	FALSE	-0.121271	7.06273	0.203308	0.505931	FALSE	-0.16943	6.9011	0.157601	0.487673	FALSE	-0.186122	6.93088	0.198188	0.518943
AP2S1	0.137038	7.99561	0.393021	0.624797	FALSE	-0.0424183	7.59528	0.725386	0.89844	FALSE	0.0983758	7.61353	0.523033	0.810146	FALSE	-0.00356553	7.46926	0.977518	0.990018	FALSE	-0.0503335	7.8587	0.680602	0.840553	FALSE	-0.0434378	7.58387	0.815705	0.93136	FALSE	-0.046035	7.99435	0.735436	0.877558	FALSE	0.00400315	7.84708	0.969774	0.988695	FALSE	-0.0868419	7.41226	0.550711	0.802627	FALSE	0.141086	7.08551	0.510464	0.75617
AP3B1	-0.227651	6.54021	0.0789632	0.2721	FALSE	-0.158889	7.52546	0.0736406	0.368428	FALSE	-0.281318	7.35931	0.0367114	0.312685	FALSE	-0.094316	7.03522	0.377679	0.650975	FALSE	-0.0749176	7.78892	0.469375	0.696965	FALSE	-0.213261	7.19186	0.0891605	0.399897	FALSE	-0.231882	6.53216	0.0368495	0.210269	FALSE	-0.211242	6.97106	0.0828159	0.343047	FALSE	-0.109078	7.01297	0.442663	0.737689	FALSE	-0.0739538	8.21333	0.680225	0.854685
AP3D1	-0.0267454	5.22234	0.77405	0.884201	FALSE	-0.0800767	5.80029	0.178354	0.518453	FALSE	-0.0582132	5.64125	0.549094	0.824796	FALSE	-0.034013	5.27199	0.751958	0.895007	FALSE	-0.0531604	5.8815	0.441337	0.676595	FALSE	-0.0256524	5.42553	0.79101	0.923718	FALSE	-0.110316	5.25325	0.172184	0.438711	FALSE	0.0238156	5.50592	0.798686	0.925475	FALSE	-0.146081	5.3144	0.20427	0.534244	FALSE	NA	NA	NA	NA
AP3M1	0.0215773	4.303	0.845429	0.926473	FALSE	0.074479	4.86039	0.339392	0.673002	FALSE	0.187884	4.69739	0.122139	0.487977	FALSE	-0.0812628	4.13808	0.591356	0.800675	FALSE	-0.0360581	4.93232	0.713827	0.861566	FALSE	0.109701	4.63514	0.345905	0.673207	FALSE	-0.054734	4.3255	0.548881	0.7682	FALSE	0.00969161	4.6353	0.916157	0.971195	FALSE	0.0530199	4.79624	0.720531	0.893202	FALSE	NA	NA	NA	NA
AP3M2	-0.00597436	3.16329	0.96797	0.984731	FALSE	0.114543	3.84274	0.289843	0.630701	FALSE	0.0312122	3.44108	0.830834	0.947094	FALSE	-0.123732	3.06256	0.514472	0.752108	FALSE	-0.136123	3.49588	0.189048	0.444941	FALSE	-0.0267346	3.66367	0.886361	0.962719	FALSE	-0.0037256	3.14428	0.979694	0.993366	FALSE	0.0128362	3.40212	0.92961	0.97571	FALSE	NA	NA	NA	NA	NA	NA	NA	NA	NA
AP3S1	0.382682	6.28256	0.00530672	0.0771334	TRUE	0.202942	6.21947	0.0422071	0.293949	FALSE	0.343401	6.17501	0.00249494	0.127179	FALSE	0.1811	5.91141	0.100685	0.335872	FALSE	0.224951	6.26965	0.0172863	0.138432	FALSE	0.181586	6.32345	0.175279	0.512269	FALSE	0.332222	6.23037	0.00455505	0.0847169	TRUE	0.378808	6.27866	0.000299947	0.0255054	TRUE	0.0686432	6.30012	0.599668	0.832792	FALSE	0.315739	5.71602	0.13952	0.454186
AP3S2	-0.256737	4.72072	0.0528913	0.221871	FALSE	-0.0965566	5.70551	0.285946	0.626101	FALSE	-0.0662485	5.47795	0.624171	0.858056	FALSE	0.0516579	4.77039	0.679588	0.854485	FALSE	-0.152558	5.53166	0.159885	0.406772	FALSE	-0.240657	5.27439	0.0710109	0.3632	FALSE	-0.285464	4.80923	0.030214	0.195274	FALSE	-0.187699	5.13028	0.137863	0.425521	FALSE	-0.371523	5.01442	0.0562126	0.316675	FALSE	NA	NA	NA	NA
AP4B1	NA	NA	NA	NA	NA	0.0334712	1.84704	0.811399	0.932638	FALSE	0.242387	1.54037	0.154828	0.528221	FALSE	NA	NA	NA	NA	NA	NA	NA	NA	NA	NA	NA	NA	NA	NA	NA	NA	NA	NA	NA	NA	NA	NA	NA	NA	NA	NA	NA	NA	NA	NA	NA	NA	NA	NA
AP4E1	0.13976	3.94509	0.423527	0.652449	FALSE	0.305863	5.06974	0.0167632	0.204067	FALSE	0.205897	4.63375	0.194255	0.563124	FALSE	-0.139397	3.9018	0.440462	0.69953	FALSE	0.181238	4.98436	0.0987639	0.320099	FALSE	0.027371	4.50359	0.853212	0.94705	FALSE	0.0350759	3.97735	0.812775	0.920933	FALSE	0.165963	4.40909	0.262259	0.570622	FALSE	NA	NA	NA	NA	NA	NA	NA	NA	NA
AP4M1	0.107676	2.67838	0.557919	0.754679	FALSE	0.168594	2.66195	0.266336	0.606482	FALSE	0.189157	2.74037	0.339698	0.699556	FALSE	0.146361	2.34615	0.5337	0.76535	FALSE	0.13462	2.69653	0.371867	0.624678	FALSE	0.163693	2.8526	0.356736	0.679216	FALSE	-0.0921984	2.72674	0.596327	0.798776	FALSE	NA	NA	NA	NA	NA	NA	NA	NA	NA	NA	NA	NA	NA	NA
AP4S1	0.220241	3.41778	0.0329172	0.178159	FALSE	-0.0436061	4.20241	0.65931	0.87121	FALSE	-0.0744759	3.9286	0.53707	0.818442	FALSE	0.0194131	4.01084	0.886433	0.95407	FALSE	0.0610495	4.30163	0.515939	0.731991	FALSE	0.0768659	3.94831	0.519019	0.786372	FALSE	0.205591	3.3659	0.117153	0.357778	FALSE	0.0100129	3.60704	0.941182	0.9804	FALSE	NA	NA	NA	NA	NA	NA	NA	NA	NA
AP5B1	-0.119396	5.85886	0.429865	0.656921	FALSE	-0.0432813	6.17725	0.73021	0.900309	FALSE	-0.0994392	5.92846	0.51088	0.802721	FALSE	-0.292527	5.11678	0.0373674	0.203621	FALSE	-0.101165	5.90885	0.469702	0.696965	FALSE	-0.0448423	5.90297	0.69481	0.87835	FALSE	-0.038606	5.92287	0.752173	0.887295	FALSE	0.00988756	6.20417	0.932535	0.97658	FALSE	-0.172629	5.53044	0.293474	0.619214	FALSE	NA	NA	NA	NA
AP5M1	-0.0999969	4.25946	0.309655	0.553412	FALSE	-0.100558	4.84395	0.280053	0.619551	FALSE	-0.157686	4.66168	0.1695	0.5443	FALSE	-0.225569	4.44398	0.0846532	0.309444	FALSE	-0.0136445	4.72396	0.880437	0.946308	FALSE	-0.150188	4.47214	0.273075	0.614018	FALSE	-0.106955	4.31193	0.281752	0.555916	FALSE	0.053108	4.44574	0.615341	0.831406	FALSE	-0.0471093	4.63343	0.772909	0.913021	FALSE	NA	NA	NA	NA
AP5S1	0.0852745	2.12298	0.603955	0.784442	FALSE	-0.0116615	2.22544	0.936352	0.980222	FALSE	0.300776	2.23284	0.204286	0.573682	FALSE	NA	NA	NA	NA	NA	-0.0618568	2.27298	0.734074	0.874723	FALSE	NA	NA	NA	NA	NA	NA	NA	NA	NA	NA	NA	NA	NA	NA	NA	NA	NA	NA	NA	NA	NA	NA	NA	NA
AP5Z1	0.00981241	4.16948	0.928144	0.965742	FALSE	-0.101682	4.48297	0.250085	0.591475	FALSE	-0.163447	4.40892	0.159413	0.531585	FALSE	0.0839764	4.95227	0.549897	0.775107	FALSE	-0.0683412	4.63308	0.371118	0.624187	FALSE	-0.0618457	4.55158	0.58209	0.819535	FALSE	-0.216048	4.05895	0.0343007	0.204307	FALSE	0.103144	4.34355	0.347604	0.652585	FALSE	0.0797907	5.01466	0.628035	0.848141	FALSE	NA	NA	NA	NA
APAF1	-0.0541655	2.90958	0.650511	0.814288	FALSE	0.00513669	3.71065	0.954442	0.987132	FALSE	0.0267803	3.55614	0.828061	0.946882	FALSE	-0.259076	3.25472	0.0805482	0.301474	FALSE	-0.0576145	3.87448	0.679866	0.840075	FALSE	0.0337554	3.383	0.779917	0.918136	FALSE	-0.103695	2.85828	0.466297	0.709908	FALSE	0.0202717	3.27977	0.878721	0.959249	FALSE	NA	NA	NA	NA	NA	NA	NA	NA	NA
APBA1	-0.583689	2.40341	0.028401	0.166195	FALSE	0.0781332	3.90285	0.666398	0.875933	FALSE	-0.152155	3.14578	0.594888	0.844937	FALSE	-0.622338	2.70031	0.0111779	0.117978	FALSE	-0.285012	3.02431	0.244608	0.512122	FALSE	-0.572951	3.32056	0.0130157	0.189233	FALSE	NA	NA	NA	NA	NA	NA	NA	NA	NA	NA	NA	NA	NA	NA	NA	NA	NA	NA	NA
APBA3	0.207245	2.21646	0.287298	0.533209	FALSE	-0.0205186	2.17925	0.887388	0.961564	FALSE	0.0868271	2.50236	0.632407	0.861595	FALSE	NA	NA	NA	NA	NA	0.315539	2.65746	0.0501475	0.226855	FALSE	NA	NA	NA	NA	NA	NA	NA	NA	NA	NA	NA	NA	NA	NA	NA	NA	NA	NA	NA	NA	NA	NA	NA	NA
APBB1IP	-0.0356057	5.6186	0.841495	0.924776	FALSE	0.0165018	6.35844	0.91004	0.970166	FALSE	-0.0479595	5.69873	0.807865	0.942199	FALSE	0.199778	5.68459	0.214368	0.493563	FALSE	-0.311645	6.16911	0.0325951	0.182655	FALSE	-0.0647734	5.30381	0.715482	0.890131	FALSE	-0.176003	5.77541	0.24474	0.520969	FALSE	-0.0490322	5.87069	0.741015	0.895274	FALSE	0.0707483	5.68099	0.692713	0.882107	FALSE	NA	NA	NA	NA
APBB2	-0.311284	4.48138	0.212267	0.454586	FALSE	0.132008	5.99752	0.534076	0.802616	FALSE	-0.0850791	5.55803	0.741436	0.911331	FALSE	-0.368819	5.09103	0.0219907	0.161198	FALSE	-0.285926	4.58165	0.248922	0.516526	FALSE	0.125817	5.50992	0.503325	0.778836	FALSE	0.135548	4.45477	0.525415	0.749824	FALSE	0.0280585	5.0024	0.900374	0.96694	FALSE	-0.106131	4.85104	0.674449	0.872581	FALSE	NA	NA	NA	NA
APC	-0.345197	5.50404	0.00599361	0.0807399	TRUE	-0.133208	6.51847	0.0813432	0.381029	FALSE	-0.146511	6.11044	0.217197	0.589809	FALSE	-0.350965	5.55827	0.0170985	0.141569	FALSE	-0.235074	6.19085	0.00283489	0.0528092	TRUE	-0.21136	6.09969	0.0810218	0.384366	FALSE	-0.204989	5.43599	0.0679128	0.279325	FALSE	-0.194431	6.03116	0.0373285	0.235987	FALSE	-0.183198	5.95051	0.21483	0.550896	FALSE	-0.684822	6.2188	0.00128458	0.0723717
APEH	0.0830914	3.35149	0.620084	0.794885	FALSE	-0.014404	3.26555	0.924796	0.975718	FALSE	0.0432823	3.25989	0.818929	0.944968	FALSE	-0.105141	2.67536	0.59596	0.801482	FALSE	-0.211044	3.2851	0.136621	0.375806	FALSE	0.192253	2.9654	0.351055	0.675402	FALSE	-0.260796	3.38691	0.133402	0.383619	FALSE	0.0257463	3.34286	0.893188	0.963426	FALSE	NA	NA	NA	NA	NA	NA	NA	NA	NA
APEX1	0.311396	5.58306	0.10526	0.313131	FALSE	0.0852144	5.36733	0.59047	0.835717	FALSE	0.173794	5.31379	0.403655	0.741222	FALSE	0.356942	5.2544	0.0389212	0.208054	FALSE	0.0618551	5.10016	0.643761	0.820208	FALSE	0.0940979	5.10332	0.5871	0.822173	FALSE	0.0213078	5.51346	0.905023	0.961351	FALSE	0.0683642	5.44723	0.669924	0.85824	FALSE	0.297022	4.73785	0.22559	0.561373	FALSE	NA	NA	NA	NA
APEX2	0.0919169	3.0223	0.649754	0.813853	FALSE	0.189038	2.96908	0.128738	0.457078	FALSE	0.275399	2.82808	0.143917	0.514047	FALSE	-0.409418	2.05533	0.0294403	0.184198	FALSE	-0.0419749	2.74136	0.763658	0.892687	FALSE	-0.0208936	2.75562	0.909638	0.97318	FALSE	0.0613819	3.1429	0.700438	0.857983	FALSE	NA	NA	NA	NA	NA	NA	NA	NA	NA	NA	NA	NA	NA	NA
APH1A	0.326249	5.49266	0.0312367	0.172999	FALSE	0.215802	5.26046	0.0498506	0.316241	FALSE	0.238355	5.32104	0.0851616	0.436744	FALSE	0.305698	4.93073	0.0634426	0.266355	FALSE	0.238975	5.38549	0.0469184	0.218408	FALSE	0.069099	5.32789	0.654196	0.856514	FALSE	0.0991451	5.47879	0.445506	0.693018	FALSE	0.260492	5.46225	0.0174612	0.163701	FALSE	0.383421	5.12125	0.0465221	0.292591	FALSE	NA	NA	NA	NA
APH1B	0.0028695	5.47071	0.975001	0.987864	FALSE	-0.0302644	5.50592	0.711067	0.891507	FALSE	0.014283	5.49651	0.884615	0.966307	FALSE	-0.227056	5.18812	0.0240049	0.169279	FALSE	-0.00301213	5.44089	0.970452	0.986341	FALSE	-0.0957559	5.34153	0.383362	0.696567	FALSE	-0.110827	5.55302	0.239624	0.51511	FALSE	-0.02383	5.37327	0.805539	0.928813	FALSE	-0.10738	5.17297	0.452166	0.742267	FALSE	-0.788564	5.35127	0.00183881	0.0815242
API5	-0.135858	5.3437	0.16032	0.393061	FALSE	-0.0291239	5.80785	0.660427	0.872034	FALSE	-0.0456539	5.65793	0.585396	0.841709	FALSE	-0.192258	5.47175	0.133973	0.387238	FALSE	-0.0425699	5.85017	0.558534	0.764034	FALSE	-0.0410298	5.64827	0.662842	0.862369	FALSE	-0.154403	5.33735	0.0520509	0.246246	FALSE	0.00326313	5.52721	0.966502	0.987169	FALSE	-0.099197	5.81288	0.405079	0.710795	FALSE	0.0828623	5.98086	0.657922	0.840572
APIP	0.594236	6.74911	0.00412362	0.0706814	TRUE	0.312144	6.58801	0.0665816	0.351836	FALSE	0.574455	6.57465	0.00604956	0.171394	FALSE	0.416274	6.22234	0.0271096	0.177676	FALSE	0.225944	5.80869	0.0705889	0.272104	FALSE	0.46371	6.52039	0.0112161	0.178831	FALSE	0.284352	6.71936	0.0851615	0.310073	FALSE	0.470554	6.72605	0.00261845	0.0668325	TRUE	0.533932	6.41002	0.00192445	0.0867389	TRUE	NA	NA	NA	NA
APLF	-0.28601	3.15226	0.187673	0.426364	FALSE	-0.0310218	4.42888	0.83252	0.941001	FALSE	0.0376386	4.43644	0.859824	0.95601	FALSE	-0.448854	2.92864	0.0352608	0.198563	FALSE	-0.22213	3.91214	0.188717	0.444754	FALSE	-0.039981	3.83326	0.857023	0.947928	FALSE	-0.388824	3.24282	0.046217	0.232421	FALSE	-0.0765852	3.79154	0.619158	0.833516	FALSE	NA	NA	NA	NA	NA	NA	NA	NA	NA
APLP2	-0.2377	8.72951	0.0700646	0.254651	FALSE	-0.193996	8.99466	0.103289	0.420036	FALSE	-0.255946	8.99758	0.0598562	0.375036	FALSE	-0.105974	8.81482	0.290819	0.572739	FALSE	-0.160953	8.96772	0.153977	0.399474	FALSE	-0.176872	8.82091	0.17481	0.511876	FALSE	-0.185644	8.71198	0.0780371	0.296942	FALSE	-0.0991467	8.86839	0.323197	0.629791	FALSE	-0.0283055	8.80653	0.799974	0.924585	FALSE	-0.215061	6.69507	0.263695	0.593485
APMAP	0.010377	4.59053	0.94929	0.975845	FALSE	-0.10862	4.53059	0.297103	0.637042	FALSE	-0.0795883	4.3517	0.568431	0.832418	FALSE	0.162174	4.21633	0.319103	0.601712	FALSE	-0.0330571	4.32089	0.79533	0.908485	FALSE	0.00366726	4.35462	0.981983	0.993024	FALSE	-0.136649	4.45836	0.293903	0.567436	FALSE	-0.100146	4.38906	0.464704	0.734453	FALSE	0.000505208	4.24743	0.99805	0.999789	FALSE	-0.0225153	5.42021	0.923452	0.964769
APOBEC3C	0.276209	3.08651	0.268695	0.513763	FALSE	-0.0968221	3.12707	0.687468	0.882525	FALSE	0.0638485	3.04262	0.806169	0.941489	FALSE	0.467895	2.72482	0.053597	0.244646	FALSE	-0.207219	3.00829	0.336774	0.598308	FALSE	0.193165	3.0392	0.428094	0.726748	FALSE	0.159863	3.10424	0.548027	0.767714	FALSE	0.352178	3.37961	0.183494	0.485261	FALSE	NA	NA	NA	NA	NA	NA	NA	NA	NA
APOBEC3G	-0.23269	3.43292	0.528331	0.731999	FALSE	-0.516913	3.17259	0.118072	0.443423	FALSE	-0.0316695	3.39723	0.941197	0.984583	FALSE	-0.00469516	2.86379	0.987409	0.994316	FALSE	0.0937514	3.47824	0.788917	0.904501	FALSE	-0.0494461	3.03059	0.880007	0.959836	FALSE	-0.35685	3.4901	0.287714	0.562151	FALSE	0.342904	4.54437	0.222921	0.529293	FALSE	NA	NA	NA	NA	NA	0.319779	6.0638	0.315482	0.627194
APOBR	0.274166	3.35705	0.120732	0.335958	FALSE	0.165264	4.04745	0.357852	0.687145	FALSE	0.015439	3.48612	0.932932	0.983227	FALSE	0.177758	3.63443	0.310201	0.592586	FALSE	0.109111	4.1608	0.478209	0.703137	FALSE	0.0532831	3.26241	0.771516	0.91623	FALSE	-0.128975	3.4267	0.421403	0.672063	FALSE	0.067733	3.69186	0.700117	0.871963	FALSE	NA	NA	NA	NA	NA	NA	NA	NA	NA
APOC1	0.735769	12.3024	0.00187389	0.0506389	TRUE	0.517152	11.6082	0.00532433	0.127579	FALSE	0.600249	11.6087	0.013216	0.227062	FALSE	0.605776	11.807	0.0053032	0.0816789	TRUE	0.405995	10.8568	0.0716987	0.274417	FALSE	0.524099	11.6669	0.033353	0.280974	FALSE	0.714115	12.1872	0.000193898	0.0198894	TRUE	0.579485	11.9064	0.00108237	0.0433315	TRUE	0.444264	11.5065	0.0645202	0.33772	FALSE	-0.125172	7.28386	0.80072	0.913129
APOC2	0.988655	7.59407	0.00255133	0.055667	TRUE	0.589974	6.88405	0.0231799	0.232259	FALSE	0.532884	6.47917	0.102287	0.462446	FALSE	1.01322	7.08174	0.00186921	0.0529189	TRUE	0.751163	5.84583	0.0184356	0.139675	FALSE	0.885475	6.32837	0.00377485	0.1212	FALSE	0.882485	7.26361	0.000455412	0.0287735	TRUE	1.00124	7.08761	0.000461076	0.0299414	TRUE	0.875172	6.46798	0.143695	0.469565	FALSE	NA	NA	NA	NA
APOE	-0.110042	11.352	0.684279	0.835057	FALSE	-0.241618	10.5271	0.318779	0.654173	FALSE	-0.0426987	10.9273	0.876662	0.96374	FALSE	-0.042068	11.1936	0.844637	0.938133	FALSE	0.0352194	11.0076	0.892296	0.952036	FALSE	-0.0942404	10.6426	0.694001	0.877869	FALSE	-0.154425	11.3481	0.470228	0.713277	FALSE	-0.0771206	11.0088	0.704884	0.875645	FALSE	-0.185101	10.8742	0.497968	0.767535	FALSE	NA	NA	NA	NA
APOL1	-0.359848	4.22601	0.275277	0.520911	FALSE	-0.380517	4.56759	0.257833	0.599102	FALSE	-0.203368	4.46029	0.599173	0.846756	FALSE	-0.138972	4.04085	0.591922	0.800675	FALSE	-0.385717	4.01079	0.256738	0.522823	FALSE	-0.299508	4.40584	0.284895	0.623754	FALSE	-0.34232	4.16154	0.246567	0.522166	FALSE	-0.105348	5.2705	0.637733	0.842607	FALSE	NA	NA	NA	NA	NA	NA	NA	NA	NA
APOL2	0.167544	5.2968	0.520561	0.72605	FALSE	0.226412	5.57231	0.368027	0.694419	FALSE	0.193397	5.40519	0.551847	0.825857	FALSE	0.0609811	5.02423	0.773034	0.905361	FALSE	-0.0673958	5.42532	0.777555	0.900146	FALSE	0.213415	5.46143	0.3387	0.667854	FALSE	0.118976	5.18742	0.607914	0.805696	FALSE	0.217647	6.21713	0.274856	0.580364	FALSE	0.316252	5.54485	0.248837	0.58643	FALSE	-0.0861481	5.8713	0.746958	0.885649
APOL3	-0.820361	3.22031	0.0986846	0.302894	FALSE	-0.895545	3.39635	0.111402	0.432499	FALSE	-0.309257	3.87446	0.588966	0.842668	FALSE	-0.718782	2.56529	0.0650762	0.270215	FALSE	-0.928352	3.60941	0.0581929	0.246666	FALSE	NA	NA	NA	NA	NA	NA	NA	NA	NA	NA	-0.500981	4.5593	0.149908	0.442294	FALSE	NA	NA	NA	NA	NA	NA	NA	NA	NA
APOL4	-0.598731	3.71197	0.369796	0.604237	FALSE	-0.245586	3.87088	0.682446	0.880325	FALSE	-0.155886	3.35582	0.84692	0.952351	FALSE	0.0791503	4.00773	0.867221	0.945685	FALSE	-0.586335	2.79644	0.337747	0.598916	FALSE	-0.230875	3.72563	0.672132	0.867004	FALSE	-0.0272179	3.59525	0.962414	0.98663	FALSE	-0.378174	4.58759	0.525178	0.777915	FALSE	NA	NA	NA	NA	NA	NA	NA	NA	NA
APOL6	0.131368	6.99216	0.613677	0.790541	FALSE	0.122857	7.43853	0.616091	0.851121	FALSE	0.219272	7.27098	0.472253	0.78131	FALSE	0.133596	6.89694	0.546386	0.772414	FALSE	0.029425	7.16842	0.91295	0.962478	FALSE	0.139096	7.14368	0.511362	0.78134	FALSE	0.083623	6.92931	0.696151	0.855375	FALSE	0.356706	8.13848	0.0121719	0.137098	FALSE	-0.105784	7.38712	0.66825	0.868756	FALSE	0.25878	5.85442	0.514282	0.758615
APOO	-0.379076	4.30731	0.124688	0.342056	FALSE	-0.34825	4.33404	0.187044	0.528114	FALSE	-0.407218	4.98055	0.163375	0.534545	FALSE	-0.124763	3.75741	0.553633	0.777082	FALSE	-0.289901	4.60964	0.158559	0.4043	FALSE	-0.426193	4.37796	0.070878	0.363065	FALSE	-0.186478	4.55056	0.378253	0.637293	FALSE	-0.103721	4.58283	0.597414	0.822757	FALSE	NA	NA	NA	NA	NA	NA	NA	NA	NA
APOOL	-0.0376424	4.02764	0.784019	0.889838	FALSE	0.10913	4.57727	0.304079	0.642774	FALSE	0.25379	4.29346	0.100239	0.460729	FALSE	-0.0639152	3.68869	0.669803	0.848761	FALSE	-0.0349034	4.41146	0.780905	0.902404	FALSE	0.15571	4.33467	0.31058	0.645377	FALSE	-0.182122	3.94687	0.173502	0.440697	FALSE	-0.0157483	4.29165	0.892757	0.963426	FALSE	NA	NA	NA	NA	NA	NA	NA	NA	NA
APP	-0.331851	4.49121	0.270415	0.515742	FALSE	-0.392599	5.28551	0.172722	0.510483	FALSE	-0.0947126	5.0951	0.755896	0.917016	FALSE	-0.722091	5.95335	0.0276672	0.179655	FALSE	-0.0167393	6.39119	0.884089	0.947822	FALSE	-0.457785	4.95696	0.0822597	0.386167	FALSE	-0.286044	4.56137	0.295568	0.569264	FALSE	-0.430383	5.0914	0.0396664	0.243952	FALSE	-0.213546	5.35574	0.462265	0.747007	FALSE	0.0194952	5.88001	0.943083	0.973748
APPBP2	-0.523075	5.12072	7.52228e-06	0.00319815	TRUE	-0.289889	6.08064	0.000414052	0.0522051	TRUE	-0.369315	5.71075	0.000608308	0.0904613	TRUE	-0.488876	5.37635	0.00147958	0.0489131	TRUE	-0.191847	5.87576	0.0149548	0.128108	FALSE	-0.361495	5.75204	0.00480143	0.128583	FALSE	-0.420329	5.0523	3.4702e-05	0.00817748	TRUE	-0.253137	5.45285	0.0199894	0.173991	FALSE	-0.38544	5.91415	0.00308498	0.106138	FALSE	-0.164855	5.55921	0.456997	0.713461
APPL1	0.231792	5.99995	0.0682787	0.252054	FALSE	0.0542775	6.19591	0.525761	0.798443	FALSE	0.101785	6.09806	0.368161	0.721806	FALSE	0.297076	5.79898	0.0235323	0.1671	FALSE	-0.069614	5.8709	0.439324	0.675375	FALSE	0.00832529	6.18914	0.946061	0.984698	FALSE	0.061392	6.00411	0.586717	0.792132	FALSE	0.213754	6.31639	0.0199757	0.173991	FALSE	0.250597	6.10089	0.0647978	0.33772	FALSE	-0.367495	5.98816	0.0934925	0.379291
APPL2	-0.20132	3.67576	0.0937861	0.294595	FALSE	-0.111996	4.71188	0.160311	0.498443	FALSE	-0.0733405	4.36783	0.527382	0.811094	FALSE	-0.172426	4.01835	0.198562	0.474031	FALSE	-0.101344	4.50621	0.265379	0.530318	FALSE	-0.0611406	4.41037	0.706942	0.886158	FALSE	-0.0467866	3.68582	0.671255	0.842232	FALSE	-0.20691	4.04363	0.12592	0.407139	FALSE	0.0111449	4.38286	0.946405	0.981665	FALSE	NA	NA	NA	NA
APRT	0.0801323	7.32437	0.6052	0.784758	FALSE	-0.051506	6.83494	0.696344	0.884806	FALSE	0.0224527	6.98251	0.886721	0.966307	FALSE	-0.117033	6.69449	0.372521	0.646854	FALSE	-0.00461843	6.92033	0.971219	0.986578	FALSE	0.0329129	6.95265	0.846214	0.945222	FALSE	0.00465823	7.35046	0.972546	0.991189	FALSE	-0.0342959	7.11557	0.78054	0.916451	FALSE	-0.0943798	6.66745	0.563912	0.810597	FALSE	-0.142106	7.01346	0.412697	0.68873
APTR	0.121994	2.77224	0.441589	0.666484	FALSE	0.13358	3.66285	0.211444	0.551904	FALSE	-0.0869402	3.3465	0.631378	0.861199	FALSE	-0.0814341	3.68267	0.666745	0.847172	FALSE	0.341626	3.81466	0.00854108	0.0941428	TRUE	0.180641	3.56841	0.316767	0.651246	FALSE	0.397255	2.70403	0.0232425	0.172116	FALSE	NA	NA	NA	NA	NA	NA	NA	NA	NA	NA	NA	NA	NA	NA
APTX	0.0345224	4.79797	0.762051	0.876286	FALSE	0.0852328	5.26927	0.329345	0.663641	FALSE	0.129617	5.00087	0.289233	0.65795	FALSE	-0.0167188	4.88279	0.909904	0.965193	FALSE	-0.0255049	4.94756	0.793983	0.908083	FALSE	0.0283225	5.04911	0.807987	0.929347	FALSE	-0.0763785	4.76384	0.422908	0.672853	FALSE	-0.00769268	4.93131	0.942076	0.980691	FALSE	0.103703	4.97811	0.426064	0.724101	FALSE	NA	NA	NA	NA
AQP3	0.823307	5.30023	0.0163929	0.129667	FALSE	0.741035	5.24452	0.0163366	0.200953	FALSE	0.538313	4.76112	0.0946663	0.45247	FALSE	0.773387	5.73255	0.00296394	0.0649838	TRUE	0.278114	4.15928	0.266508	0.531689	FALSE	0.758409	5.12836	0.00440466	0.128015	FALSE	0.849602	5.21473	0.00426066	0.0809339	TRUE	0.752852	4.92109	0.00862221	0.119782	FALSE	0.94302	6.07116	0.00694579	0.139506	FALSE	NA	NA	NA	NA
AQP9	0.372835	7.95545	0.0643189	0.246291	FALSE	0.196008	8.29602	0.228384	0.567531	FALSE	0.120537	8.52013	0.49451	0.793468	FALSE	0.273792	8.34951	0.158356	0.423131	FALSE	0.040973	8.06336	0.782054	0.902469	FALSE	0.088986	8.2107	0.526899	0.791125	FALSE	0.182303	7.96559	0.217012	0.488039	FALSE	0.330984	8.21517	0.0319061	0.21868	FALSE	0.339713	8.27316	0.0514145	0.302568	FALSE	NA	NA	NA	NA
AQR	-0.142501	4.65975	0.191202	0.430181	FALSE	0.0295127	5.44604	0.647761	0.865671	FALSE	0.0661735	5.15919	0.515559	0.805704	FALSE	-0.340176	4.78363	0.0306752	0.188264	FALSE	-0.06252	5.46532	0.457335	0.688759	FALSE	-0.0875875	5.12919	0.426155	0.726068	FALSE	-0.243094	4.65233	0.0246919	0.176322	FALSE	-0.11095	5.00111	0.233344	0.541577	FALSE	-0.166076	5.06057	0.283914	0.613766	FALSE	-0.226042	5.59133	0.183124	0.501688
ARAF	0.246616	4.02938	0.0446809	0.208064	FALSE	0.0827091	4.08306	0.411642	0.729047	FALSE	0.224412	4.09341	0.106384	0.468589	FALSE	0.14929	3.56776	0.358045	0.635487	FALSE	-0.0145434	4.12947	0.894348	0.953192	FALSE	0.144048	3.99852	0.284146	0.623179	FALSE	0.00673407	4.01078	0.955116	0.983659	FALSE	0.164342	4.16349	0.191601	0.494944	FALSE	NA	NA	NA	NA	NA	NA	NA	NA	NA
ARAP1	-0.0858878	5.17328	0.479788	0.697268	FALSE	-0.125036	5.86287	0.213162	0.552849	FALSE	-0.0867596	5.44005	0.560479	0.828704	FALSE	-0.0451217	4.98532	0.713915	0.874108	FALSE	-0.0630724	5.75037	0.587869	0.784149	FALSE	-0.251312	5.33976	0.068963	0.36175	FALSE	-0.121541	5.21358	0.23059	0.505282	FALSE	-0.0557558	5.39506	0.588608	0.816279	FALSE	-0.0975713	4.966	0.511789	0.778458	FALSE	NA	NA	NA	NA
ARAP2	-0.121005	4.37317	0.602872	0.783675	FALSE	-0.0594997	5.49627	0.76787	0.916111	FALSE	-0.148929	5.08047	0.611167	0.852424	FALSE	0.187442	5.04991	0.268465	0.554625	FALSE	-0.158834	5.0604	0.495142	0.715891	FALSE	0.0959539	5.13626	0.677064	0.869999	FALSE	0.00849411	4.21533	0.970597	0.990129	FALSE	-0.109727	5.38166	0.640978	0.844451	FALSE	-0.0775352	4.96049	0.745715	0.903709	FALSE	-0.189688	8.73324	0.405673	0.685476
ARC	NA	NA	NA	NA	NA	NA	NA	NA	NA	NA	NA	NA	NA	NA	NA	1.5234	3.77419	0.00294195	0.0648437	TRUE	NA	NA	NA	NA	NA	NA	NA	NA	NA	NA	NA	NA	NA	NA	NA	NA	NA	NA	NA	NA	NA	NA	NA	NA	NA	NA	NA	NA	NA
ARCN1	-0.185548	6.16266	0.177132	0.412309	FALSE	-0.0829921	6.33243	0.419011	0.732135	FALSE	-0.061826	6.30214	0.615091	0.853717	FALSE	-0.103358	5.90432	0.375737	0.649134	FALSE	0.0165802	6.3763	0.845002	0.930453	FALSE	0.0147208	6.21804	0.908087	0.972201	FALSE	-0.113733	6.13472	0.267906	0.542091	FALSE	-0.0160335	6.29128	0.890213	0.963426	FALSE	-0.00233875	6.30521	0.987102	0.996726	FALSE	-0.315818	6.19111	0.0811602	0.3557
AREG	0.458316	1.57878	0.22165	0.464486	FALSE	NA	NA	NA	NA	NA	NA	NA	NA	NA	NA	0.460166	4.40863	0.160162	0.425014	FALSE	NA	NA	NA	NA	NA	NA	NA	NA	NA	NA	NA	NA	NA	NA	NA	NA	NA	NA	NA	NA	NA	NA	NA	NA	NA	NA	NA	NA	NA
AREL1	-0.208492	3.43969	0.096901	0.299169	FALSE	-0.000669427	4.48825	0.993517	0.999004	FALSE	-0.00968944	4.19077	0.926146	0.980876	FALSE	-0.259931	4.06163	0.130704	0.382793	FALSE	-0.189249	4.63094	0.059987	0.249544	FALSE	-0.151158	4.05668	0.300723	0.637186	FALSE	-0.119158	3.53778	0.404712	0.659945	FALSE	0.0535753	3.9185	0.659492	0.853363	FALSE	NA	NA	NA	NA	NA	NA	NA	NA	NA
ARF1	0.196386	7.89953	0.0964238	0.298575	FALSE	0.0285924	7.75416	0.702959	0.886843	FALSE	0.0973459	7.88006	0.330697	0.694101	FALSE	0.206282	7.84833	0.045384	0.223653	FALSE	0.132329	8.00452	0.0951694	0.314789	FALSE	0.150357	7.84927	0.203547	0.543463	FALSE	0.110192	7.88216	0.279333	0.553821	FALSE	0.142175	7.89877	0.0944329	0.36174	FALSE	0.263678	8.05712	0.0128216	0.186672	FALSE	0.0927112	7.53382	0.485041	0.736351
ARF3	0.0972557	5.63339	0.376142	0.60959	FALSE	-0.0319241	5.5414	0.658019	0.870399	FALSE	0.0499295	5.56361	0.581392	0.839522	FALSE	0.0172427	5.17914	0.891206	0.95618	FALSE	0.0787328	5.6095	0.410992	0.65329	FALSE	-0.0204321	5.45714	0.858273	0.948422	FALSE	0.00123129	5.60806	0.98963	0.996544	FALSE	0.0363881	5.64314	0.674683	0.860343	FALSE	-0.0421221	5.15752	0.756351	0.906673	FALSE	-0.0921711	5.60397	0.635091	0.830229
ARF4	0.243798	7.34466	0.0640588	0.245971	FALSE	0.129369	7.01561	0.175754	0.514914	FALSE	0.0897717	7.18896	0.438855	0.763462	FALSE	0.232784	7.41556	0.0350416	0.198419	FALSE	0.132843	7.29077	0.0955555	0.315307	FALSE	0.416203	7.24966	0.00349296	0.120207	FALSE	0.187917	7.46327	0.121267	0.364093	FALSE	0.238031	7.21419	0.00872116	0.11987	FALSE	0.219407	7.56959	0.0781545	0.361811	FALSE	0.134328	6.91085	0.377645	0.666773
ARF5	1.01169	4.97524	6.67664e-06	0.00310082	TRUE	0.634341	4.43561	0.000239371	0.0460798	TRUE	0.719829	4.60763	0.00066446	0.0904613	TRUE	0.850199	4.42961	0.000129571	0.0148938	TRUE	0.917768	4.7681	5.04902e-07	0.00093459	TRUE	0.865638	4.67593	7.31634e-05	0.0339874	TRUE	0.799856	5.00147	4.15299e-05	0.0092846	TRUE	0.794431	4.82605	5.93091e-06	0.00458934	TRUE	0.898855	4.57045	0.000247406	0.0417939	TRUE	NA	NA	NA	NA
ARF6	0.256972	6.73259	0.0615421	0.240665	FALSE	0.00324013	6.69685	0.976461	0.994038	FALSE	0.096986	6.64367	0.481882	0.788102	FALSE	0.135874	6.75416	0.307297	0.589604	FALSE	0.0926794	6.63152	0.362578	0.616492	FALSE	0.0920827	6.80481	0.436425	0.731861	FALSE	0.0071385	6.7089	0.954575	0.983451	FALSE	0.185292	6.78706	0.111052	0.38928	FALSE	-0.0265612	7.15397	0.820386	0.932561	FALSE	-0.00826528	6.83394	0.959794	0.980567
ARFGAP1	-0.112363	2.5852	0.456244	0.67869	FALSE	0.0725761	2.93934	0.557437	0.815106	FALSE	0.104013	2.71421	0.424004	0.753812	FALSE	-0.0939558	2.4781	0.626011	0.820571	FALSE	0.0152651	2.94091	0.902029	0.956486	FALSE	0.0716694	2.75229	0.611727	0.834829	FALSE	0.101306	2.66691	0.479794	0.720701	FALSE	NA	NA	NA	NA	NA	NA	NA	NA	NA	NA	NA	NA	NA	NA
ARFGAP2	-0.0963259	4.19986	0.42278	0.651525	FALSE	-0.22752	4.33216	0.037944	0.282011	FALSE	-0.113528	4.3146	0.36205	0.715774	FALSE	-0.167779	4.06638	0.236951	0.518691	FALSE	-0.0834023	4.53851	0.445223	0.679656	FALSE	-0.0741833	4.26466	0.556455	0.807636	FALSE	-0.230695	4.19282	0.0226085	0.170227	FALSE	-0.0688533	4.28363	0.58331	0.81369	FALSE	-0.0820826	4.33699	0.690697	0.880897	FALSE	NA	NA	NA	NA
ARFGAP3	-0.242836	6.89445	0.0899871	0.290226	FALSE	-0.338409	7.0942	0.00741791	0.143102	FALSE	-0.403939	7.173	0.014099	0.228172	FALSE	0.0299713	7.44755	0.824058	0.928542	FALSE	-0.128845	7.37414	0.279316	0.545037	FALSE	-0.114955	7.07716	0.326526	0.660104	FALSE	-0.131034	6.9704	0.311414	0.583291	FALSE	-0.131183	6.9992	0.25779	0.565735	FALSE	-0.0312494	7.29736	0.831567	0.937486	FALSE	-0.122677	6.50544	0.619063	0.823996
ARFGEF1	-0.342882	6.20882	0.00520548	0.0766106	TRUE	-0.17608	7.16868	0.0498652	0.316241	FALSE	-0.225612	6.81218	0.0527189	0.356046	FALSE	-0.296454	6.5224	0.0137171	0.127889	FALSE	-0.248709	6.85476	0.00145847	0.0382471	TRUE	-0.224413	6.78633	0.0255241	0.257051	FALSE	-0.359353	6.11694	0.001345	0.0461694	TRUE	-0.103189	6.53511	0.276395	0.582319	FALSE	-0.220757	6.80032	0.0668967	0.34218	FALSE	-0.292823	6.68774	0.0331936	0.252679
ARFGEF2	-0.308549	5.35306	0.0517904	0.221206	FALSE	-0.0642479	6.48299	0.436929	0.745052	FALSE	-0.0503569	6.17458	0.651387	0.869917	FALSE	-0.287817	5.50379	0.0515532	0.240222	FALSE	-0.122942	6.35056	0.196626	0.454246	FALSE	-0.177225	6.00178	0.10875	0.43283	FALSE	-0.249739	5.42448	0.0327744	0.200533	FALSE	-0.0805793	5.81668	0.485098	0.750887	FALSE	-0.235397	5.77949	0.128245	0.444665	FALSE	-0.0234738	5.89774	0.885339	0.952472
ARFIP1	-0.29167	4.863	0.0117038	0.108709	FALSE	-0.0343003	5.59456	0.697118	0.88506	FALSE	-0.0972764	5.33103	0.390641	0.733284	FALSE	-0.232244	5.0855	0.0218968	0.161141	FALSE	-0.111543	5.55988	0.181312	0.435276	FALSE	-0.160394	5.22977	0.159795	0.498116	FALSE	-0.300392	4.76929	0.0139971	0.141214	FALSE	-0.13891	5.21056	0.133916	0.421349	FALSE	-0.257575	5.31177	0.0461957	0.292591	FALSE	NA	NA	NA	NA
ARFIP2	0.0923721	3.33305	0.545008	0.74488	FALSE	0.0881067	3.10721	0.467603	0.762964	FALSE	0.168577	3.13716	0.328996	0.692249	FALSE	0.0903415	2.90576	0.55921	0.781276	FALSE	0.0416901	3.15787	0.758977	0.890051	FALSE	0.279611	3.26968	0.123547	0.453618	FALSE	0.0841352	3.35096	0.590093	0.794111	FALSE	0.161018	3.25214	0.185537	0.489328	FALSE	NA	NA	NA	NA	NA	NA	NA	NA	NA
ARFRP1	0.275191	3.58819	0.0895328	0.289719	FALSE	0.0609603	3.3659	0.643629	0.862633	FALSE	0.359468	3.4511	0.0654593	0.389093	FALSE	-0.0472741	3.1593	0.789875	0.914433	FALSE	0.387414	3.67678	0.00514593	0.0717596	TRUE	0.121661	3.41982	0.331706	0.664136	FALSE	-0.038903	3.65305	0.783052	0.905691	FALSE	0.213732	3.62456	0.0671993	0.312816	FALSE	NA	NA	NA	NA	NA	NA	NA	NA	NA
ARG2	NA	NA	NA	NA	NA	0.00378831	1.98591	0.980796	0.994558	FALSE	NA	NA	NA	NA	NA	-0.397405	2.97504	0.103643	0.339984	FALSE	NA	NA	NA	NA	NA	NA	NA	NA	NA	NA	NA	NA	NA	NA	NA	NA	NA	NA	NA	NA	NA	NA	NA	NA	NA	NA	NA	NA	NA
ARGLU1	0.0575574	5.62302	0.676869	0.829865	FALSE	-0.111981	6.07138	0.222821	0.563385	FALSE	-0.192627	5.92367	0.121966	0.487673	FALSE	0.14707	6.12524	0.253713	0.536549	FALSE	0.055216	6.1495	0.529168	0.741694	FALSE	0.0853129	5.97158	0.443252	0.737333	FALSE	-0.0957651	5.58557	0.403875	0.659436	FALSE	-0.00855626	5.80508	0.938431	0.9792	FALSE	0.0327669	6.29929	0.820387	0.932561	FALSE	-0.378222	7.08726	0.00986662	0.145102
ARHGAP1	0.312173	3.53784	0.0497476	0.217086	FALSE	0.272454	4.10508	0.0334593	0.268922	FALSE	0.382867	3.9577	0.0410491	0.325823	FALSE	0.0533219	3.13703	0.761306	0.900913	FALSE	0.164437	3.96469	0.232211	0.497615	FALSE	-0.00986384	3.84302	0.949189	0.985453	FALSE	0.0649946	3.58547	0.672381	0.842753	FALSE	0.404775	3.8875	0.00152778	0.0501198	TRUE	NA	NA	NA	NA	NA	NA	NA	NA	NA
ARHGAP10	-0.117116	6.75545	0.489701	0.703625	FALSE	-0.141533	8.01419	0.326379	0.660555	FALSE	-0.0477879	7.65128	0.789535	0.935417	FALSE	-0.260334	7.26513	0.0725038	0.286247	FALSE	0.108975	8.2929	0.42103	0.660981	FALSE	-0.119035	7.41077	0.421998	0.723945	FALSE	-0.2177	6.78276	0.187231	0.455459	FALSE	-0.146959	7.51818	0.310956	0.618063	FALSE	-0.0346141	7.47338	0.823683	0.93467	FALSE	-0.414401	8.70111	0.0695705	0.337513
ARHGAP12	0.0564113	2.83756	0.762846	0.876376	FALSE	0.273378	3.7923	0.0986028	0.412931	FALSE	0.306281	3.50172	0.136361	0.508116	FALSE	0.240413	3.39764	0.139046	0.395856	FALSE	-0.0997078	4.3176	0.450293	0.683395	FALSE	0.119839	3.57925	0.594315	0.825281	FALSE	0.129011	2.97526	0.432662	0.681972	FALSE	0.271482	3.47561	0.139608	0.42643	FALSE	NA	NA	NA	NA	NA	NA	NA	NA	NA
ARHGAP15	-0.562182	5.20799	0.0276449	0.16499	FALSE	-0.341654	6.58407	0.15677	0.494496	FALSE	-0.362483	6.43859	0.148103	0.519764	FALSE	-0.324893	6.43131	0.137008	0.392602	FALSE	-0.259894	6.45578	0.141926	0.384462	FALSE	-0.394233	5.77555	0.12967	0.460725	FALSE	-0.34275	5.29267	0.0998404	0.333784	FALSE	-0.367639	5.9007	0.0777136	0.33464	FALSE	0.0470483	5.62035	0.875686	0.956679	FALSE	-0.0373998	5.89062	0.891545	0.953569
ARHGAP17	-0.0946328	5.4836	0.417741	0.646497	FALSE	-0.0260484	6.6234	0.758774	0.912505	FALSE	0.0825681	6.00957	0.417979	0.749607	FALSE	-0.192825	6.24084	0.225671	0.505131	FALSE	-0.179453	6.17905	0.0908604	0.307597	FALSE	-0.0205985	6.16026	0.864716	0.952246	FALSE	-0.064156	5.40708	0.541586	0.762612	FALSE	0.0532859	6.07131	0.6243	0.835886	FALSE	0.0061597	6.39749	0.962433	0.987725	FALSE	NA	NA	NA	NA
ARHGAP18	-0.312762	6.58621	0.072365	0.259096	FALSE	-0.331898	7.1486	0.00771307	0.145673	FALSE	-0.439484	6.63744	0.0305583	0.299591	FALSE	-0.035669	6.81489	0.793893	0.915704	FALSE	-0.17265	7.24118	0.203493	0.462882	FALSE	-0.202259	6.69643	0.16622	0.504802	FALSE	-0.367601	6.594	0.00812539	0.111941	FALSE	-0.314815	6.64654	0.0248613	0.192268	FALSE	-0.0675649	6.51993	0.625425	0.846954	FALSE	NA	NA	NA	NA
ARHGAP19	-0.192639	1.88311	0.274842	0.520316	FALSE	0.16358	2.72872	0.299594	0.638688	FALSE	0.153435	2.30186	0.437055	0.762229	FALSE	0.0850781	2.13816	0.595126	0.80136	FALSE	-0.219634	2.94106	0.126866	0.363196	FALSE	NA	NA	NA	NA	NA	NA	NA	NA	NA	NA	NA	NA	NA	NA	NA	NA	NA	NA	NA	NA	NA	NA	NA	NA
ARHGAP21	0.0666635	5.33478	0.631176	0.802822	FALSE	0.0212001	6.17607	0.839784	0.94417	FALSE	0.0073879	6.01266	0.954022	0.988669	FALSE	0.0222999	6.25042	0.875964	0.950033	FALSE	0.0301872	6.39309	0.8144	0.917475	FALSE	0.0730309	6.04884	0.610539	0.834239	FALSE	-0.0161791	5.28505	0.892604	0.956752	FALSE	0.238532	5.78295	0.0452683	0.26063	FALSE	0.151709	6.30005	0.25839	0.594849	FALSE	0.247139	5.98464	0.354094	0.650576
ARHGAP22	-0.0314228	3.50316	0.880485	0.942345	FALSE	0.0359733	4.38227	0.869434	0.954882	FALSE	-0.127685	4.35433	0.582972	0.840116	FALSE	0.249833	3.88337	0.223756	0.50227	FALSE	0.0834345	5.85054	0.564474	0.769157	FALSE	0.219425	4.02902	0.296064	0.632679	FALSE	0.246454	3.74499	0.152918	0.413168	FALSE	0.294914	4.00335	0.166938	0.462713	FALSE	NA	NA	NA	NA	NA	0.0406513	6.46665	0.88694	0.952472
ARHGAP24	-0.463599	7.0015	0.145162	0.372727	FALSE	-0.092688	8.56532	0.707274	0.889685	FALSE	-0.0959853	8.6005	0.722574	0.905832	FALSE	-0.495353	7.96523	0.0247746	0.171575	FALSE	-0.285113	9.21881	0.136282	0.375301	FALSE	-0.0627685	8.25385	0.795394	0.924951	FALSE	-0.300027	7.14939	0.274782	0.549744	FALSE	-0.288475	7.89264	0.235811	0.543899	FALSE	-0.219738	8.24357	0.398271	0.705704	FALSE	NA	NA	NA	NA
ARHGAP25	-0.420405	4.39139	0.111034	0.323451	FALSE	-0.236187	5.45291	0.343516	0.676864	FALSE	-0.00853782	5.11555	0.973414	0.993507	FALSE	-0.248018	3.96965	0.244628	0.527769	FALSE	-0.445672	5.12823	0.0424298	0.207977	FALSE	-0.230128	4.64948	0.346831	0.673233	FALSE	-0.540219	4.48393	0.0325738	0.200008	FALSE	-0.285942	5.52215	0.15752	0.450909	FALSE	NA	NA	NA	NA	NA	NA	NA	NA	NA
ARHGAP26	-0.801303	5.54978	0.00150708	0.045236	TRUE	-0.488423	7.03248	0.0145708	0.192017	FALSE	-0.598975	6.23175	0.0386135	0.318267	FALSE	-0.532174	6.90282	0.00915635	0.107016	FALSE	-0.421211	7.18092	0.0072246	0.0865421	TRUE	-0.498868	6.26146	0.0255258	0.257051	FALSE	-0.594845	5.67751	0.00738461	0.107977	FALSE	-0.520907	6.29533	0.0272663	0.202289	FALSE	-0.501188	6.46166	0.0261811	0.238107	FALSE	-0.330381	6.44906	0.214394	0.537334
ARHGAP27	-0.228834	2.71855	0.15855	0.390687	FALSE	-0.199696	3.417	0.0956299	0.40689	FALSE	-0.339446	3.08107	0.0898393	0.443686	FALSE	-0.282144	3.523	0.0804568	0.301409	FALSE	0.0951258	3.51774	0.483555	0.707388	FALSE	-0.0876802	3.22658	0.584823	0.821241	FALSE	NA	NA	NA	NA	NA	0.115427	3.50482	0.556542	0.797722	FALSE	NA	NA	NA	NA	NA	NA	NA	NA	NA
ARHGAP30	-0.193141	4.95945	0.187318	0.426052	FALSE	-0.10218	5.69038	0.412184	0.729131	FALSE	-0.0799301	5.14218	0.680776	0.886276	FALSE	-0.093583	4.6413	0.529485	0.76225	FALSE	-0.0661725	5.32716	0.564042	0.768727	FALSE	-0.278441	4.89951	0.0970167	0.415328	FALSE	-0.315012	5.0268	0.0287709	0.191053	FALSE	-0.0681802	5.20381	0.645035	0.846281	FALSE	-0.107926	4.57818	0.635468	0.851381	FALSE	NA	NA	NA	NA
ARHGAP31	-0.20398	6.24577	0.204961	0.446899	FALSE	-0.0754312	7.38317	0.570217	0.823112	FALSE	-0.188193	7.21294	0.242876	0.614251	FALSE	0.119663	6.88136	0.467286	0.717996	FALSE	-0.0718191	7.3109	0.515268	0.731568	FALSE	-0.0216781	6.85059	0.882429	0.961175	FALSE	-0.177219	6.23641	0.19502	0.464332	FALSE	-0.00820251	6.82416	0.955421	0.984359	FALSE	-0.221427	6.56518	0.179976	0.510182	FALSE	-0.290588	6.95452	0.200962	0.521515
ARHGAP31-AS1	NA	NA	NA	NA	NA	NA	NA	NA	NA	NA	NA	NA	NA	NA	NA	0.477882	2.68313	0.0359766	0.200068	FALSE	NA	NA	NA	NA	NA	NA	NA	NA	NA	NA	NA	NA	NA	NA	NA	NA	NA	NA	NA	NA	NA	NA	NA	NA	NA	NA	NA	NA	NA
ARHGAP32	-0.707477	4.43849	0.000789934	0.0343303	TRUE	-0.374899	5.9601	0.00948694	0.15806	FALSE	-0.557682	5.13412	0.00317322	0.141984	FALSE	-0.121301	5.57079	0.561558	0.783083	FALSE	-0.475637	4.45196	0.000429432	0.0213734	TRUE	-0.365829	5.63491	0.063435	0.352271	FALSE	-0.365423	4.32529	0.0564905	0.255491	FALSE	-0.571373	4.73318	0.00149758	0.0499734	TRUE	-0.227022	5.82078	0.192121	0.520609	FALSE	NA	NA	NA	NA
ARHGAP35	-0.262782	3.60092	0.0701311	0.254651	FALSE	-0.112043	4.74065	0.313521	0.650255	FALSE	-0.0789215	4.34046	0.645639	0.866203	FALSE	-0.33155	3.63931	0.0469233	0.22844	FALSE	-0.118962	4.55877	0.380458	0.630481	FALSE	-0.373046	4.31557	0.0120815	0.185306	FALSE	-0.289668	3.65761	0.0432004	0.226211	FALSE	-0.0475266	3.94881	0.779084	0.915822	FALSE	NA	NA	NA	NA	NA	NA	NA	NA	NA
ARHGAP4	-0.08016	2.60741	0.571708	0.76277	FALSE	-0.235758	2.83969	0.0991501	0.41424	FALSE	-0.366481	2.56235	0.0403406	0.323763	FALSE	-0.0053971	2.66251	0.973799	0.988626	FALSE	-0.230011	2.78053	0.125834	0.362052	FALSE	NA	NA	NA	NA	NA	-0.181972	2.72412	0.213588	0.484229	FALSE	NA	NA	NA	NA	NA	NA	NA	NA	NA	NA	NA	NA	NA	NA
ARHGAP45	NA	NA	NA	NA	NA	0.520595	1.91499	0.0167218	0.204033	FALSE	0.561461	2.1339	0.0325003	0.306708	FALSE	NA	NA	NA	NA	NA	0.419656	3.45292	0.00171213	0.0417123	TRUE	NA	NA	NA	NA	NA	NA	NA	NA	NA	NA	NA	NA	NA	NA	NA	NA	NA	NA	NA	NA	NA	NA	NA	NA
ARHGAP5	-0.158645	4.8733	0.22163	0.464486	FALSE	-0.00293189	5.7799	0.981137	0.994558	FALSE	-0.171046	5.45022	0.303434	0.669428	FALSE	-0.0225674	5.50546	0.87649	0.950033	FALSE	-0.126261	5.59192	0.253924	0.520578	FALSE	0.0382147	5.53094	0.812023	0.931051	FALSE	-0.0227405	4.97596	0.875688	0.950039	FALSE	-0.140968	5.46083	0.281229	0.588149	FALSE	0.177456	5.58824	0.248797	0.58643	FALSE	-0.272523	6.00045	0.142423	0.455897
ARHGAP6	-0.51064	4.69136	0.00759784	0.0886897	TRUE	-0.286653	6.01502	0.179116	0.519021	FALSE	-0.505829	4.8674	0.0529853	0.356369	FALSE	-0.594823	5.01667	6.9941e-05	0.0114442	TRUE	-0.727468	4.31231	0.00653597	0.0825316	TRUE	-0.513123	5.25728	0.0124817	0.187199	FALSE	-0.68101	4.52315	0.000411043	0.027782	TRUE	-0.665693	4.75815	0.0105821	0.129563	FALSE	-0.354722	5.14422	0.148346	0.477152	FALSE	NA	NA	NA	NA
ARHGDIA	0.259808	7.13068	0.0746564	0.2641	FALSE	0.0756358	6.98211	0.434708	0.743795	FALSE	0.164344	7.05257	0.226965	0.598749	FALSE	0.163637	6.76564	0.137623	0.393895	FALSE	0.141624	7.13934	0.1526	0.397767	FALSE	0.127771	7.00602	0.365402	0.685173	FALSE	0.046322	7.10218	0.709265	0.862722	FALSE	0.203445	7.11576	0.0499844	0.274312	FALSE	0.24296	7.2422	0.0359433	0.266534	FALSE	-0.0974538	6.8577	0.490008	0.74031
ARHGDIB	0.1966	6.90996	0.555325	0.752338	FALSE	-0.187175	6.48467	0.495407	0.782437	FALSE	-0.132056	6.52522	0.69461	0.892593	FALSE	0.204056	6.59334	0.426173	0.689505	FALSE	-0.114683	6.53634	0.636324	0.816245	FALSE	-0.162101	6.24082	0.601139	0.82909	FALSE	-0.0466097	7.02418	0.873558	0.949835	FALSE	-0.121846	6.68869	0.642759	0.845218	FALSE	-0.0171248	5.93216	0.960528	0.987523	FALSE	NA	NA	NA	NA
ARHGEF1	-0.249244	3.67439	0.0389025	0.194174	FALSE	-0.104364	4.08857	0.275445	0.61545	FALSE	-0.133723	4.01589	0.326191	0.690017	FALSE	-0.401602	3.39661	0.00176582	0.0518154	TRUE	-0.188438	4.26046	0.0706221	0.272104	FALSE	-0.146148	3.77387	0.293894	0.630361	FALSE	-0.210896	3.78644	0.0793641	0.299143	FALSE	-0.200935	3.95391	0.0662965	0.311096	FALSE	NA	NA	NA	NA	NA	NA	NA	NA	NA
ARHGEF10	NA	NA	NA	NA	NA	0.184618	2.11616	0.529475	0.80041	FALSE	NA	NA	NA	NA	NA	NA	NA	NA	NA	NA	NA	NA	NA	NA	NA	NA	NA	NA	NA	NA	NA	NA	NA	NA	NA	NA	NA	NA	NA	NA	NA	NA	NA	NA	NA	NA	NA	NA	NA
ARHGEF10L	-0.259754	5.1518	0.134674	0.358949	FALSE	-0.201152	5.98307	0.253627	0.594494	FALSE	-0.155028	5.8126	0.467821	0.780266	FALSE	-0.41488	4.89181	0.0521129	0.240823	FALSE	-0.227203	5.8589	0.152435	0.397767	FALSE	-0.253263	5.45545	0.092439	0.406684	FALSE	-0.385971	5.24519	0.0192566	0.158616	FALSE	-0.154483	5.65958	0.252856	0.56015	FALSE	-0.469699	4.89871	0.0424365	0.283564	FALSE	NA	NA	NA	NA
ARHGEF11	-0.499493	5.2522	0.00270918	0.0576913	TRUE	-0.147939	6.3357	0.16533	0.502509	FALSE	-0.248906	6.09773	0.101008	0.461791	FALSE	-0.493191	5.23198	0.000194908	0.0176222	TRUE	-0.471498	5.96035	0.000948532	0.031812	TRUE	-0.426661	5.87787	0.00187352	0.0959168	TRUE	-0.400298	5.27086	0.00265083	0.0631491	TRUE	-0.223103	5.95762	0.0771563	0.333564	FALSE	-0.374385	5.5286	0.0219636	0.22423	FALSE	NA	NA	NA	NA
ARHGEF12	-0.294126	3.14175	0.0793594	0.272917	FALSE	-0.032683	4.32359	0.800381	0.928257	FALSE	0.0874081	3.9932	0.620624	0.856429	FALSE	-0.401142	3.4145	0.0518466	0.240577	FALSE	-0.173342	4.19142	0.249989	0.516844	FALSE	-0.0783909	4.01185	0.673423	0.867816	FALSE	-0.0770168	3.21414	0.64312	0.827667	FALSE	-0.135771	3.73513	0.381134	0.674724	FALSE	NA	NA	NA	NA	NA	NA	NA	NA	NA
ARHGEF18	-0.279292	3.94232	0.0515108	0.220634	FALSE	-0.0494829	4.95592	0.646296	0.864269	FALSE	0.0533292	4.55972	0.667638	0.877879	FALSE	-0.469547	3.84049	0.0019775	0.0537769	TRUE	-0.155863	4.6606	0.110661	0.33717	FALSE	-0.288333	4.48102	0.0215113	0.238628	FALSE	-0.307308	4.00536	0.00901798	0.116658	FALSE	-0.274746	4.30461	0.0136416	0.14552	FALSE	NA	NA	NA	NA	NA	NA	NA	NA	NA
ARHGEF2	-0.0219822	5.33325	0.834384	0.921081	FALSE	-0.101004	5.93509	0.267471	0.607137	FALSE	-0.238484	5.91025	0.0332526	0.307769	FALSE	0.0573834	5.74166	0.658309	0.841773	FALSE	0.145648	6.24171	0.112681	0.340308	FALSE	-0.0384637	5.63895	0.739732	0.902342	FALSE	-0.0366334	5.42945	0.71405	0.864948	FALSE	0.146662	5.50195	0.174534	0.473843	FALSE	0.149622	5.58235	0.290041	0.615185	FALSE	-0.379458	6.74461	0.00766628	0.138035
ARHGEF28	-0.902885	4.1821	0.000256024	0.0193279	TRUE	-0.882425	5.35862	0.00107663	0.074423	TRUE	-1.07195	3.91164	0.000858904	0.0907575	TRUE	-0.631831	4.13893	0.00590165	0.0868514	TRUE	NA	NA	NA	NA	NA	-0.740683	4.59693	0.0228354	0.243313	FALSE	-0.829888	3.90131	0.00132842	0.0460549	TRUE	-0.723835	4.25132	0.00285917	0.0691657	TRUE	NA	NA	NA	NA	NA	NA	NA	NA	NA
ARHGEF3	-0.56079	5.42629	0.0508635	0.219598	FALSE	-0.293652	6.59488	0.272724	0.613122	FALSE	-0.396566	6.023	0.190867	0.56023	FALSE	-0.108211	5.73771	0.563206	0.783185	FALSE	-0.658954	5.40499	0.0100807	0.10234	FALSE	-0.317288	6.0306	0.166231	0.504802	FALSE	-0.404478	5.38212	0.147396	0.404494	FALSE	-0.223187	5.96447	0.37681	0.672133	FALSE	-0.295598	5.84302	0.327406	0.644772	FALSE	NA	NA	NA	NA
ARHGEF35	-0.706599	4.48215	0.0312975	0.173148	FALSE	-0.585233	4.79575	0.064102	0.347621	FALSE	-0.589985	4.30163	0.10608	0.46813	FALSE	-0.772848	4.21122	0.00259561	0.061606	TRUE	-0.935692	2.74035	0.0150486	0.128709	FALSE	-0.5394	4.78332	0.0257198	0.257917	FALSE	-0.579173	4.48203	0.0439762	0.227327	FALSE	-0.594421	4.37453	0.0183789	0.167509	FALSE	-0.209176	5.01355	0.484369	0.760063	FALSE	NA	NA	NA	NA
ARHGEF40	NA	NA	NA	NA	NA	NA	NA	NA	NA	NA	NA	NA	NA	NA	NA	NA	NA	NA	NA	NA	-0.878822	2.6788	0.000267268	0.0164849	TRUE	NA	NA	NA	NA	NA	NA	NA	NA	NA	NA	NA	NA	NA	NA	NA	NA	NA	NA	NA	NA	NA	NA	NA	NA
ARHGEF5	-0.774747	4.08349	0.00147937	0.0451008	TRUE	-0.560686	4.81332	0.0123819	0.177933	FALSE	-0.744428	4.20343	0.00757552	0.187241	FALSE	-0.43129	4.07968	0.0252326	0.173008	FALSE	NA	NA	NA	NA	NA	-0.453215	4.46196	0.0285436	0.266526	FALSE	-0.597333	4.07882	0.00735679	0.107977	FALSE	-0.582514	4.02963	0.0184491	0.167557	FALSE	-0.480229	4.67099	0.0622604	0.330847	FALSE	NA	NA	NA	NA
ARHGEF6	-0.171866	2.85281	0.299599	0.543666	FALSE	-0.285675	3.60639	0.0399854	0.286332	FALSE	-0.427476	3.10227	0.0135314	0.228172	FALSE	-0.0295067	3.18641	0.871269	0.948446	FALSE	-0.272702	3.09687	0.101246	0.324298	FALSE	-0.383176	3.09098	0.0623394	0.350045	FALSE	-0.314974	2.85892	0.0292068	0.192337	FALSE	NA	NA	NA	NA	NA	NA	NA	NA	NA	NA	NA	NA	NA	NA
ARHGEF7	-0.239074	4.78876	0.0321634	0.175529	FALSE	-0.155957	5.90228	0.0769222	0.373879	FALSE	-0.175053	5.35431	0.121817	0.48727	FALSE	-0.364154	5.51509	0.0153871	0.13495	FALSE	-0.148596	5.45641	0.103347	0.327353	FALSE	-0.117826	5.45578	0.288893	0.627637	FALSE	-0.229454	4.68227	0.0731972	0.287999	FALSE	-0.163681	5.09468	0.183603	0.485385	FALSE	-0.309503	5.53313	0.044898	0.289487	FALSE	-0.391428	5.66606	0.0350331	0.25873
ARHGEF9	-0.273056	1.57122	0.128861	0.348717	FALSE	-0.0110295	2.42076	0.941993	0.98274	FALSE	-0.0399764	2.05735	0.84998	0.952398	FALSE	NA	NA	NA	NA	NA	NA	NA	NA	NA	NA	NA	NA	NA	NA	NA	NA	NA	NA	NA	NA	NA	NA	NA	NA	NA	NA	NA	NA	NA	NA	NA	NA	NA	NA
ARID1A	-0.161423	5.22256	0.241995	0.485095	FALSE	0.0414811	6.15964	0.669396	0.876625	FALSE	0.00436477	5.95502	0.973015	0.993284	FALSE	-0.292339	5.0986	0.0683108	0.276874	FALSE	-0.161738	6.10054	0.120456	0.353715	FALSE	-0.160083	5.80925	0.179497	0.518321	FALSE	-0.231808	5.29682	0.0560728	0.254778	FALSE	-0.14782	5.63519	0.204723	0.508065	FALSE	-0.317696	5.36417	0.0883147	0.37583	FALSE	-0.372665	6.00424	0.0322757	0.250683
ARID1B	-0.438972	6.30496	0.0169745	0.131809	FALSE	-0.151924	7.6433	0.119022	0.445272	FALSE	-0.156549	7.38038	0.271977	0.643231	FALSE	-0.415629	6.78875	0.0166879	0.14105	FALSE	-0.335546	7.22978	0.00119183	0.0353569	TRUE	-0.29651	7.10624	0.0346043	0.284851	FALSE	-0.288082	6.34818	0.0429257	0.225599	FALSE	-0.324064	7.01055	0.0172033	0.163537	FALSE	-0.562517	6.78265	0.00207705	0.089808	TRUE	-0.26188	8.66657	0.190472	0.509025
ARID2	-0.233073	5.4908	0.150201	0.379117	FALSE	0.00876818	6.77212	0.910779	0.970166	FALSE	-0.112795	6.56046	0.421471	0.752579	FALSE	-0.142839	6.27613	0.278311	0.561691	FALSE	-0.150674	6.90273	0.0840901	0.296814	FALSE	-0.137259	6.38565	0.290771	0.628499	FALSE	-0.232759	5.49301	0.104111	0.339536	FALSE	-0.0769897	6.10807	0.518981	0.775777	FALSE	-0.238517	6.35007	0.125398	0.438087	FALSE	-0.280351	7.50822	0.0640947	0.326836
ARID3A	-0.436007	2.96943	0.0182599	0.137147	FALSE	-0.134826	3.48147	0.452509	0.755442	FALSE	-0.139132	3.79426	0.445078	0.766776	FALSE	-0.42232	2.60266	0.0425989	0.217133	FALSE	0.0948867	4.75049	0.558697	0.764148	FALSE	-0.621801	3.29215	0.00210359	0.097301	TRUE	-0.4165	3.16667	0.0210073	0.164715	FALSE	NA	NA	NA	NA	NA	NA	NA	NA	NA	NA	-0.22506	5.48908	0.444619	0.705109
ARID3B	0.0166704	2.7116	0.921675	0.962843	FALSE	0.246446	3.93943	0.0807047	0.379044	FALSE	0.107071	3.12709	0.619668	0.855785	FALSE	0.391836	4.30094	0.0387033	0.207977	FALSE	0.162214	3.6904	0.307449	0.571119	FALSE	0.141287	3.33964	0.45226	0.745156	FALSE	-0.104056	2.70346	0.549472	0.768613	FALSE	NA	NA	NA	NA	NA	NA	NA	NA	NA	NA	NA	NA	NA	NA
ARID4A	-0.25468	5.25637	0.0203049	0.143192	FALSE	-0.116894	5.81939	0.148154	0.484899	FALSE	-0.133058	5.56193	0.284449	0.65307	FALSE	-0.0661816	5.54679	0.509982	0.749028	FALSE	-0.257203	5.70708	0.00113573	0.0345824	TRUE	-0.215471	5.54346	0.0271277	0.262121	FALSE	-0.242363	5.19568	0.0196701	0.160284	FALSE	-0.126774	5.38153	0.224202	0.531193	FALSE	-0.356218	5.43738	0.00682972	0.138501	FALSE	-0.266545	6.2492	0.133379	0.443287
ARID4B	-0.20658	6.46955	0.0778309	0.270233	FALSE	-0.202274	7.20575	0.00477368	0.123222	FALSE	-0.2627	7.1135	0.00685872	0.17997	FALSE	-0.0171126	7.45436	0.878533	0.950825	FALSE	-0.169672	7.38899	0.0154499	0.130977	FALSE	-0.0575358	6.99514	0.565115	0.810905	FALSE	-0.178639	6.41583	0.058817	0.259846	FALSE	-0.0842066	6.94679	0.356368	0.660497	FALSE	-0.130644	7.26285	0.165886	0.496783	FALSE	-0.186123	8.17043	0.158559	0.473159
ARID5A	-0.297317	4.86812	0.0776683	0.269765	FALSE	-0.421915	4.82037	0.00626433	0.135135	FALSE	-0.297252	4.77146	0.130786	0.500334	FALSE	-0.417606	5.20467	0.00906731	0.106362	FALSE	-0.202855	5.04438	0.145543	0.388815	FALSE	-0.269234	4.76264	0.11186	0.437055	FALSE	-0.285484	4.86403	0.0531012	0.248298	FALSE	0.0317318	5.19709	0.847648	0.946959	FALSE	-0.355585	5.20887	0.057105	0.31701	FALSE	NA	NA	NA	NA
ARID5B	-0.371134	5.38337	0.107539	0.316769	FALSE	-0.275703	6.12023	0.21294	0.552849	FALSE	-0.170453	6.71707	0.366804	0.720147	FALSE	-0.241331	6.35133	0.151755	0.414322	FALSE	-0.336285	7.45592	0.0223368	0.150945	FALSE	-0.51941	5.87686	0.0141189	0.196251	FALSE	-0.555869	5.57375	0.00691402	0.104297	FALSE	-0.460375	6.21039	0.0156829	0.157781	FALSE	-0.56825	5.91678	0.0287248	0.245179	FALSE	-0.558031	7.75209	0.00491155	0.109594
ARIH1	-0.200592	5.99136	0.119019	0.333869	FALSE	-0.120367	7.15524	0.12069	0.446775	FALSE	-0.193837	6.84261	0.108068	0.47069	FALSE	-0.20404	7.58261	0.191008	0.465773	FALSE	-0.19922	7.09387	0.0172119	0.138432	FALSE	-0.0492383	6.80527	0.684838	0.873781	FALSE	-0.205386	5.92371	0.0972395	0.328744	FALSE	-0.103669	6.54986	0.37043	0.669157	FALSE	-0.115328	7.22767	0.35955	0.672823	FALSE	-0.290368	7.1888	0.043587	0.285703
ARIH2	0.262707	5.996	0.0025269	0.0555064	TRUE	0.066235	6.33901	0.310742	0.648869	FALSE	0.14301	6.24294	0.0719685	0.404793	FALSE	0.209242	6.14737	0.067154	0.274241	FALSE	0.0522353	6.4108	0.406385	0.650181	FALSE	0.0853759	6.30853	0.33057	0.663163	FALSE	0.170629	5.95776	0.0329432	0.200861	FALSE	0.178886	6.17026	0.0209684	0.1788	FALSE	0.240235	6.49415	0.0279079	0.244559	FALSE	-0.0100777	6.6316	0.939897	0.972817
ARL1	0.398792	5.8347	0.00542925	0.0780996	TRUE	0.263469	5.52274	0.0131229	0.184086	FALSE	0.403064	5.61575	0.00589114	0.169291	FALSE	0.299952	5.15326	0.0876847	0.314103	FALSE	0.329799	5.50363	0.00128204	0.0365073	TRUE	0.478746	5.57254	0.000307514	0.0493491	TRUE	0.246284	5.77642	0.0353712	0.206352	FALSE	0.311693	5.73896	0.00738713	0.110778	FALSE	0.291604	5.40645	0.0883654	0.37583	FALSE	NA	NA	NA	NA
ARL10	NA	NA	NA	NA	NA	0.0905186	2.14315	0.527949	0.799772	FALSE	NA	NA	NA	NA	NA	NA	NA	NA	NA	NA	NA	NA	NA	NA	NA	NA	NA	NA	NA	NA	NA	NA	NA	NA	NA	NA	NA	NA	NA	NA	NA	NA	NA	NA	NA	NA	NA	NA	NA
ARL11	-0.192244	4.57838	0.175076	0.411092	FALSE	-0.116827	4.81102	0.357131	0.687058	FALSE	-0.071252	4.47194	0.70217	0.89613	FALSE	-0.0654316	4.22462	0.651936	0.838055	FALSE	-0.160007	4.53775	0.230034	0.495504	FALSE	-0.253441	4.59307	0.111639	0.436565	FALSE	-0.283002	4.53298	0.0532562	0.248577	FALSE	-0.14381	4.48096	0.364619	0.666582	FALSE	-0.246693	4.5708	0.152911	0.483494	FALSE	NA	NA	NA	NA
ARL13B	-0.379519	4.01117	0.000681895	0.0313704	TRUE	-0.173983	4.5536	0.0257297	0.241289	FALSE	-0.317013	4.42427	0.00495801	0.158788	FALSE	-0.431634	4.28379	0.00666881	0.0926341	TRUE	-0.332794	4.59863	0.000749539	0.0277387	TRUE	-0.210627	4.47928	0.0971218	0.415328	FALSE	-0.29436	3.91304	0.0150251	0.144321	FALSE	-0.291136	4.22861	0.0138199	0.146305	FALSE	-0.382139	4.27716	0.0765901	0.359619	FALSE	NA	NA	NA	NA
ARL14EP	0.242389	4.85991	0.0696606	0.254251	FALSE	0.111874	4.96117	0.234245	0.572424	FALSE	0.2451	5.01296	0.0498461	0.348257	FALSE	0.00885018	4.57319	0.95422	0.983237	FALSE	0.186983	4.9486	0.0752259	0.280009	FALSE	0.181939	4.89864	0.133933	0.465769	FALSE	0.17011	4.88468	0.118128	0.359223	FALSE	0.230763	4.95346	0.0648312	0.308017	FALSE	-0.0765387	4.89975	0.653735	0.861058	FALSE	0.14885	5.77868	0.367993	0.661453
ARL15	-0.724199	7.15091	0.00343747	0.0658657	TRUE	-0.364492	8.80151	0.00963788	0.159243	FALSE	-0.407879	8.18701	0.0389386	0.318821	FALSE	-0.68989	7.72155	0.00035653	0.0234146	TRUE	-0.383051	8.44918	0.00805059	0.0912995	TRUE	-0.494229	8.06654	0.0103388	0.172336	FALSE	-0.604871	7.13255	0.0040749	0.07964	TRUE	-0.403966	7.86991	0.0259201	0.196637	FALSE	-0.579545	7.80384	0.00350867	0.113015	FALSE	-0.339976	7.40605	0.180909	0.499143
ARL16	0.419197	3.90095	0.0570189	0.232291	FALSE	0.31452	3.67761	0.117374	0.442095	FALSE	0.351981	3.53148	0.106101	0.46813	FALSE	0.365198	3.92758	0.0199246	0.152624	FALSE	0.315358	3.66094	0.13561	0.374279	FALSE	0.654036	3.91022	0.00160326	0.090792	TRUE	0.365397	3.85346	0.0417874	0.222568	FALSE	0.467244	3.71458	0.0228474	0.185884	FALSE	NA	NA	NA	NA	NA	NA	NA	NA	NA
ARL17A	NA	NA	NA	NA	NA	-0.549922	2.78353	0.000971666	0.0738609	TRUE	-0.367328	2.3996	0.123432	0.488968	FALSE	NA	NA	NA	NA	NA	-0.695524	2.49452	0.000613792	0.0245058	TRUE	-0.490934	2.51002	0.00816076	0.156625	FALSE	NA	NA	NA	NA	NA	NA	NA	NA	NA	NA	NA	NA	NA	NA	NA	NA	NA	NA	NA
ARL17B	-0.00809438	1.85158	0.97466	0.987724	FALSE	0.109613	2.74992	0.597689	0.841212	FALSE	0.0753889	2.32948	0.79659	0.937985	FALSE	NA	NA	NA	NA	NA	NA	NA	NA	NA	NA	NA	NA	NA	NA	NA	NA	NA	NA	NA	NA	NA	NA	NA	NA	NA	NA	NA	NA	NA	NA	NA	NA	NA	NA
ARL2	0.183361	5.50353	0.31587	0.558752	FALSE	0.0238432	5.0139	0.86245	0.953233	FALSE	0.33549	5.15894	0.0673202	0.394738	FALSE	0.195474	4.79842	0.304593	0.586583	FALSE	0.0332072	5.01306	0.784737	0.902875	FALSE	0.107685	5.08667	0.551324	0.804109	FALSE	-0.00854205	5.55264	0.955038	0.983659	FALSE	0.0319809	5.37481	0.814636	0.932144	FALSE	0.030125	4.55835	0.892549	0.962555	FALSE	NA	NA	NA	NA
ARL2BP	0.289457	5.8829	0.0389676	0.1943	FALSE	0.277632	5.77173	0.00498852	0.123732	FALSE	0.271157	6.12078	0.0391132	0.319199	FALSE	0.201949	5.23977	0.0551672	0.248755	FALSE	0.0735006	5.54223	0.476955	0.702521	FALSE	0.107845	5.89876	0.454466	0.746914	FALSE	0.311825	5.98564	0.018348	0.155749	FALSE	0.378804	5.85331	0.00108637	0.0433315	TRUE	0.32625	5.67607	0.0414853	0.281101	FALSE	NA	NA	NA	NA
ARL3	0.137175	3.97027	0.315803	0.558752	FALSE	0.000538616	3.76705	0.996457	0.999193	FALSE	0.151956	3.74069	0.36716	0.720621	FALSE	0.0502163	3.67199	0.744472	0.891188	FALSE	0.137402	4.27295	0.391649	0.638937	FALSE	0.232567	4.06585	0.182964	0.523393	FALSE	0.137895	3.99487	0.335912	0.603009	FALSE	0.0679479	3.74033	0.660637	0.853363	FALSE	NA	NA	NA	NA	NA	NA	NA	NA	NA
ARL4A	0.239658	6.05115	0.131288	0.353362	FALSE	-0.0289319	5.81618	0.821924	0.936424	FALSE	0.136701	5.89704	0.359151	0.713018	FALSE	0.177057	6.43623	0.234732	0.515376	FALSE	0.186057	5.64313	0.109808	0.336103	FALSE	0.09103	5.96938	0.527891	0.791855	FALSE	0.203548	6.05883	0.125813	0.371348	FALSE	0.126946	5.86155	0.332392	0.638727	FALSE	-0.0524698	6.66525	0.749013	0.904626	FALSE	0.138848	5.91436	0.595438	0.808342
ARL4C	1.57932	2.41319	0.000176211	0.0162131	TRUE	1.66667	2.27058	7.20221e-05	0.0265116	TRUE	2.19413	3.12028	3.15198e-05	0.0355264	TRUE	NA	NA	NA	NA	NA	0.834704	4.90603	0.0162989	0.135604	FALSE	NA	NA	NA	NA	NA	1.08454	3.07325	0.00104392	0.0407127	TRUE	NA	NA	NA	NA	NA	NA	NA	NA	NA	NA	-0.985422	6.29481	0.0267318	0.230553
ARL5A	0.256598	5.60837	0.0454016	0.208504	FALSE	0.123417	5.65464	0.18017	0.519798	FALSE	0.231771	5.59667	0.0731063	0.406734	FALSE	0.216898	5.23651	0.0825812	0.305807	FALSE	-0.00463314	5.62095	0.963891	0.983154	FALSE	0.121569	5.63739	0.256784	0.597146	FALSE	0.128218	5.60694	0.291058	0.56482	FALSE	0.202573	5.61503	0.0408579	0.247661	FALSE	0.0166158	5.45856	0.9071	0.967632	FALSE	0.0372242	5.2208	0.87692	0.950972
ARL5B	0.0758358	3.43706	0.700781	0.845776	FALSE	-0.133873	3.74363	0.360466	0.688355	FALSE	-0.119976	3.90208	0.692867	0.892274	FALSE	0.34109	4.51321	0.0837091	0.307447	FALSE	0.0516446	4.09274	0.756066	0.888479	FALSE	0.0672606	3.78692	0.729893	0.897736	FALSE	0.0414403	3.34353	0.823263	0.926556	FALSE	-0.0988646	3.95122	0.636974	0.842607	FALSE	0.179021	4.16825	0.410723	0.715485	FALSE	NA	NA	NA	NA
ARL6	NA	NA	NA	NA	NA	0.285431	1.92953	0.0381145	0.282276	FALSE	0.0687982	1.60177	0.757062	0.917544	FALSE	NA	NA	NA	NA	NA	NA	NA	NA	NA	NA	NA	NA	NA	NA	NA	NA	NA	NA	NA	NA	NA	NA	NA	NA	NA	NA	NA	NA	NA	NA	NA	NA	NA	NA
ARL6IP1	0.231196	8.1869	0.196847	0.436387	FALSE	0.0586032	8.08166	0.67557	0.878086	FALSE	0.0235354	8.0241	0.902571	0.971814	FALSE	0.336907	8.81766	0.041508	0.213907	FALSE	0.176674	7.84392	0.177365	0.429666	FALSE	0.362133	8.24983	0.0407464	0.301214	FALSE	0.214344	8.07305	0.116223	0.356719	FALSE	0.189138	8.06662	0.154211	0.447513	FALSE	0.164168	8.76786	0.25672	0.59341	FALSE	-0.117166	7.56305	0.457136	0.713461
ARL6IP4	0.1718	7.06692	0.228559	0.471277	FALSE	-0.0126982	6.70968	0.912428	0.970819	FALSE	0.00288363	6.74177	0.984023	0.994672	FALSE	0.126511	6.63737	0.438895	0.698613	FALSE	0.157603	6.60811	0.193097	0.449439	FALSE	0.0881032	6.74075	0.60314	0.829514	FALSE	0.0712428	7.0408	0.542297	0.762996	FALSE	0.122162	6.89173	0.298652	0.605282	FALSE	0.131205	6.4576	0.534505	0.793914	FALSE	0.109299	6.70408	0.568433	0.792928
ARL6IP5	0.0451509	8.3857	0.800904	0.900532	FALSE	-0.119277	8.28412	0.375029	0.70064	FALSE	-0.0672793	8.31061	0.679795	0.885672	FALSE	0.0821232	8.25045	0.589181	0.800104	FALSE	-0.0461564	8.24796	0.684875	0.842746	FALSE	0.0406959	8.29001	0.778591	0.918136	FALSE	0.0143978	8.42339	0.916602	0.965646	FALSE	-0.00777645	8.37434	0.953706	0.984359	FALSE	0.000675133	8.38411	0.996422	0.999362	FALSE	-0.179465	8.83629	0.329408	0.632616
ARL6IP6	0.142457	5.2677	0.219708	0.461714	FALSE	0.0439627	5.52078	0.623028	0.853799	FALSE	0.0705045	5.38471	0.485033	0.789529	FALSE	0.0402258	5.29407	0.774532	0.905881	FALSE	0.0946662	5.48177	0.27956	0.545183	FALSE	0.0780304	5.47745	0.439738	0.734701	FALSE	0.14632	5.19269	0.131531	0.381487	FALSE	0.15629	5.54782	0.0721262	0.323505	FALSE	0.198204	5.88338	0.10025	0.395112	FALSE	0.158369	5.78882	0.385579	0.671734
ARL8A	0.164728	6.28047	0.235894	0.478908	FALSE	0.0955755	6.09484	0.313955	0.650507	FALSE	0.107114	6.16309	0.399153	0.738594	FALSE	0.14472	6.27748	0.197042	0.472665	FALSE	0.150805	6.14197	0.0979353	0.318571	FALSE	0.201419	6.32947	0.141889	0.47403	FALSE	0.187732	6.22318	0.0825949	0.305535	FALSE	0.219854	6.20798	0.0532671	0.282509	FALSE	0.227875	6.64089	0.0757476	0.35887	FALSE	0.0268812	5.72415	0.889413	0.953247
ARL8B	0.121687	7.75245	0.276071	0.521424	FALSE	-0.0289943	8.19019	0.709449	0.891024	FALSE	-0.0414758	8.23034	0.716772	0.903222	FALSE	0.0747393	8.31509	0.460811	0.714154	FALSE	0.120512	8.52085	0.170843	0.420961	FALSE	0.120368	8.12875	0.217863	0.555577	FALSE	0.0811549	7.7507	0.376009	0.63634	FALSE	0.0714277	8.06554	0.404278	0.691176	FALSE	0.139783	8.44358	0.137702	0.459537	FALSE	0.0938773	8.87281	0.417645	0.692881
ARMC1	0.0315815	4.56367	0.803087	0.901947	FALSE	0.211565	4.87051	0.0302435	0.258775	FALSE	0.210542	4.69503	0.151906	0.524664	FALSE	-0.0795368	3.96975	0.547377	0.773022	FALSE	0.0515501	4.67798	0.569438	0.772797	FALSE	0.0912318	4.72496	0.450266	0.743608	FALSE	0.0289579	4.57387	0.80202	0.915367	FALSE	-0.0884744	4.68693	0.428091	0.709785	FALSE	-0.00243395	4.43789	0.987623	0.996726	FALSE	NA	NA	NA	NA
ARMC10	-0.0813805	5.25918	0.54528	0.745043	FALSE	0.0400713	5.29708	0.691565	0.883844	FALSE	0.104217	5.11325	0.412838	0.746287	FALSE	-0.032517	4.76439	0.820753	0.928013	FALSE	-0.193557	5.07237	0.0765721	0.282827	FALSE	0.025242	5.23024	0.87002	0.954802	FALSE	-0.0114801	5.24954	0.917994	0.965986	FALSE	-0.0348325	5.28978	0.743795	0.896493	FALSE	0.0871955	4.96474	0.543831	0.798435	FALSE	NA	NA	NA	NA
ARMC2	0.0346902	2.33937	0.845233	0.926451	FALSE	0.00977454	3.03346	0.952727	0.986444	FALSE	-0.331623	2.60394	0.0521288	0.35442	FALSE	-0.0257351	2.21745	0.89173	0.956377	FALSE	NA	NA	NA	NA	NA	-0.137384	2.98967	0.661514	0.861913	FALSE	NA	NA	NA	NA	NA	NA	NA	NA	NA	NA	NA	NA	NA	NA	NA	NA	NA	NA	NA
ARMC5	NA	NA	NA	NA	NA	-0.496116	1.73842	0.00109921	0.0746164	TRUE	-0.547799	1.93979	0.00549406	0.163878	FALSE	-0.104365	2.25983	0.673449	0.850756	FALSE	NA	NA	NA	NA	NA	NA	NA	NA	NA	NA	NA	NA	NA	NA	NA	NA	NA	NA	NA	NA	NA	NA	NA	NA	NA	NA	NA	NA	NA
ARMC6	0.315306	2.27679	0.0403973	0.197618	FALSE	0.0666015	2.45062	0.602092	0.843827	FALSE	0.189552	2.24554	0.229479	0.600002	FALSE	-0.0852166	2.20726	0.661605	0.843297	FALSE	0.431812	2.50679	0.00402107	0.0619951	TRUE	NA	NA	NA	NA	NA	0.0558237	2.3247	0.748691	0.885216	FALSE	NA	NA	NA	NA	NA	NA	NA	NA	NA	NA	NA	NA	NA	NA
ARMC7	0.13298	2.43625	0.478121	0.695987	FALSE	0.125927	2.66892	0.459446	0.758959	FALSE	-0.035868	2.31558	0.86362	0.957648	FALSE	-0.0355749	2.2138	0.86503	0.945118	FALSE	0.00617737	2.40105	0.969856	0.986048	FALSE	0.0884055	2.65022	0.674918	0.868522	FALSE	-0.0664715	2.44989	0.695183	0.855029	FALSE	NA	NA	NA	NA	NA	NA	NA	NA	NA	NA	NA	NA	NA	NA
ARMC8	-0.0723612	5.00738	0.431434	0.658287	FALSE	-0.102646	5.95345	0.260035	0.601595	FALSE	-0.196902	5.47811	0.0604987	0.376412	FALSE	-0.202745	5.26559	0.100345	0.335317	FALSE	-0.0942313	5.51085	0.307971	0.571426	FALSE	-0.128287	5.49904	0.222495	0.560326	FALSE	-0.112548	4.93294	0.223358	0.495662	FALSE	-0.0730891	5.40609	0.591348	0.818285	FALSE	-0.0399584	5.59019	0.794846	0.923205	FALSE	-0.0476152	5.28318	0.84016	0.931985
ARMC9	0.403384	3.46905	0.0189845	0.13932	FALSE	0.274112	3.82496	0.132959	0.463389	FALSE	0.309158	4.45324	0.29895	0.666356	FALSE	-0.143193	3.74651	0.31029	0.592586	FALSE	0.492358	6.35098	0.0744321	0.278558	FALSE	0.326632	3.98979	0.042729	0.308901	FALSE	0.49323	3.70686	0.00573104	0.0951789	TRUE	0.33811	3.90385	0.152056	0.445177	FALSE	NA	NA	NA	NA	NA	-0.031995	8.0537	0.923615	0.964769
ARMCX1	0.00603432	3.55141	0.968522	0.984778	FALSE	-0.0462108	3.32786	0.759745	0.913021	FALSE	0.0521009	3.49927	0.807884	0.942199	FALSE	0.337673	3.84963	0.0512482	0.239654	FALSE	-0.0297543	3.52733	0.86345	0.938664	FALSE	0.0713755	3.4318	0.749299	0.907351	FALSE	-0.0372809	3.83323	0.830181	0.929185	FALSE	0.0940158	3.84006	0.613542	0.830143	FALSE	NA	NA	NA	NA	NA	NA	NA	NA	NA
ARMCX3	0.139696	5.32827	0.236431	0.4797	FALSE	0.0803551	5.42646	0.299023	0.638238	FALSE	0.143913	5.39143	0.155781	0.529219	FALSE	0.120923	5.02613	0.444355	0.701533	FALSE	-0.0214427	5.2872	0.83085	0.925277	FALSE	-0.0171816	5.25917	0.887616	0.963211	FALSE	0.0731446	5.38372	0.437482	0.686661	FALSE	0.116104	5.43261	0.229128	0.536619	FALSE	0.23622	5.05112	0.128554	0.444917	FALSE	NA	NA	NA	NA
ARMCX4	-0.402277	2.51524	0.0215137	0.14766	FALSE	-0.304169	3.94335	0.0488013	0.313741	FALSE	-0.187106	3.49966	0.332144	0.695124	FALSE	-0.427132	2.39218	0.0523256	0.241237	FALSE	-0.537115	3.41828	0.00207745	0.0468132	TRUE	-0.60322	3.25603	0.00400229	0.123399	FALSE	-0.4249	2.56542	0.0521448	0.246368	FALSE	NA	NA	NA	NA	NA	NA	NA	NA	NA	NA	NA	NA	NA	NA
ARMCX5	NA	NA	NA	NA	NA	0.12875	1.80584	0.359083	0.687712	FALSE	NA	NA	NA	NA	NA	NA	NA	NA	NA	NA	NA	NA	NA	NA	NA	NA	NA	NA	NA	NA	NA	NA	NA	NA	NA	NA	NA	NA	NA	NA	NA	NA	NA	NA	NA	NA	NA	NA	NA
ARMCX5-GPRASP2	NA	NA	NA	NA	NA	-0.0962994	2.69794	0.49368	0.781783	FALSE	-0.254366	2.10591	0.208592	0.578393	FALSE	-0.177843	2.36249	0.35684	0.63504	FALSE	0.122813	2.54456	0.498869	0.71858	FALSE	-0.251181	2.2462	0.239582	0.578108	FALSE	NA	NA	NA	NA	NA	NA	NA	NA	NA	NA	NA	NA	NA	NA	NA	NA	NA	NA	NA
ARMCX6	0.421008	4.17868	0.00232689	0.0529001	TRUE	0.296518	3.98638	0.00507526	0.124715	FALSE	0.339721	3.86842	0.0150446	0.232078	FALSE	0.290134	3.95944	0.0716771	0.28441	FALSE	0.0655695	3.65985	0.505279	0.724452	FALSE	0.415152	3.9741	0.00804511	0.156026	FALSE	0.156718	4.15912	0.181762	0.450735	FALSE	0.429794	4.28936	0.00438784	0.084671	TRUE	0.202076	4.26409	0.172652	0.503557	FALSE	NA	NA	NA	NA
ARMH1	-0.28768	2.60789	0.307977	0.552613	FALSE	-0.462539	2.961	0.0803931	0.378965	FALSE	-0.775738	2.59893	0.014506	0.230323	FALSE	0.114462	3.3731	0.680425	0.854982	FALSE	NA	NA	NA	NA	NA	-0.153606	2.89158	0.572864	0.814535	FALSE	NA	NA	NA	NA	NA	NA	NA	NA	NA	NA	NA	NA	NA	NA	NA	NA	NA	NA	NA
ARMH3	-0.183554	5.3261	0.24142	0.484479	FALSE	-0.0908282	6.63574	0.34484	0.678079	FALSE	-0.08002	6.22498	0.591132	0.843564	FALSE	-0.342394	5.62165	0.0248376	0.171763	FALSE	-0.288214	6.46234	0.010936	0.107046	FALSE	-0.273922	6.05985	0.0544257	0.334059	FALSE	-0.271354	5.27406	0.0524754	0.247182	FALSE	-0.0993203	5.92746	0.444895	0.720622	FALSE	-0.130124	5.9225	0.384859	0.693392	FALSE	-0.198865	6.45626	0.281108	0.604086
ARMH4	-0.231248	2.63802	0.147937	0.376269	FALSE	-0.0385598	3.90995	0.682661	0.880325	FALSE	-0.231441	3.64937	0.0472668	0.343644	FALSE	-0.240408	4.38242	0.0637902	0.266994	FALSE	0.0896294	4.00994	0.401776	0.647011	FALSE	-0.0181249	3.71892	0.92518	0.978737	FALSE	NA	NA	NA	NA	NA	-0.117767	3.20735	0.431103	0.7118	FALSE	NA	NA	NA	NA	NA	NA	NA	NA	NA
ARMT1	0.0179115	4.41322	0.871907	0.938332	FALSE	0.0565272	4.39902	0.47971	0.772834	FALSE	0.180194	4.60889	0.13847	0.509658	FALSE	0.0818117	4.08321	0.50177	0.743826	FALSE	0.103831	4.61904	0.28717	0.553294	FALSE	0.212915	4.39983	0.0674705	0.359183	FALSE	0.173337	4.43949	0.165488	0.429943	FALSE	0.106159	4.42997	0.27616	0.582109	FALSE	0.0663583	4.50818	0.633308	0.850889	FALSE	NA	NA	NA	NA
ARNT	-0.0120875	3.7787	0.920904	0.962346	FALSE	0.138348	4.74499	0.0598929	0.339894	FALSE	0.184693	4.49804	0.0949567	0.45247	FALSE	-0.00760549	3.89608	0.962468	0.985069	FALSE	0.00137694	4.93612	0.98661	0.993216	FALSE	0.0134908	4.36539	0.907406	0.971925	FALSE	0.0169145	3.87311	0.880163	0.95151	FALSE	0.117665	4.25355	0.324317	0.630179	FALSE	NA	NA	NA	NA	NA	NA	NA	NA	NA
ARNTL	-0.535626	4.62635	0.000260283	0.0193462	TRUE	-0.471382	5.50517	0.000312812	0.0493894	TRUE	-0.602534	5.08067	5.59818e-05	0.0355836	TRUE	-0.388421	5.33847	0.00434538	0.0759969	TRUE	-0.283076	5.15664	0.00145677	0.0382471	TRUE	-0.182158	5.11072	0.235172	0.574558	FALSE	-0.379394	4.5824	0.00354522	0.0734646	TRUE	-0.348832	5.15895	0.0073516	0.11046	FALSE	-0.188964	5.29374	0.262324	0.596993	FALSE	-0.433338	6.34954	0.0258158	0.224874
ARNTL2	-0.32093	3.90704	0.161867	0.395167	FALSE	-0.191358	4.8408	0.369671	0.695529	FALSE	-0.132444	5.35185	0.566086	0.831081	FALSE	-0.408869	4.26611	0.0659371	0.272033	FALSE	0.0566062	5.54296	0.735082	0.875409	FALSE	-0.281603	4.6536	0.205502	0.544877	FALSE	-0.299088	4.23278	0.132751	0.382614	FALSE	-0.241215	4.90239	0.221562	0.528058	FALSE	NA	NA	NA	NA	NA	-0.177625	7.1867	0.463801	0.71811
ARPC1A	0.154137	6.20252	0.232372	0.476263	FALSE	0.0501835	6.07681	0.573333	0.825136	FALSE	0.0896127	6.05804	0.431547	0.759211	FALSE	0.200724	5.64845	0.131437	0.383392	FALSE	-0.0347248	6.00937	0.634186	0.814814	FALSE	0.200228	6.30434	0.131482	0.462955	FALSE	0.143871	6.14379	0.15343	0.413862	FALSE	0.0642666	6.09195	0.533407	0.783043	FALSE	0.0502505	6.38767	0.680733	0.875921	FALSE	0.0229829	5.81786	0.889772	0.953247
ARPC1B	0.106905	9.54399	0.46002	0.68154	FALSE	0.00556506	9.16316	0.956755	0.987548	FALSE	0.0518406	9.21387	0.702078	0.89613	FALSE	0.131033	8.79604	0.361508	0.638375	FALSE	0.0273398	9.18729	0.803289	0.911597	FALSE	-0.0272907	9.20949	0.883875	0.961664	FALSE	0.0286764	9.56488	0.805877	0.917889	FALSE	0.0939061	9.38835	0.363865	0.666354	FALSE	0.0608772	8.86019	0.59103	0.827758	FALSE	0.194542	8.30763	0.25592	0.58465
ARPC2	0.195676	10.0286	0.112522	0.325454	FALSE	0.0711478	9.81419	0.415758	0.729264	FALSE	0.157996	9.92384	0.143243	0.513562	FALSE	0.185486	9.49555	0.0878236	0.314251	FALSE	0.129562	9.9292	0.105066	0.331132	FALSE	0.00551349	9.90008	0.974787	0.991519	FALSE	0.115344	10.0665	0.235783	0.511136	FALSE	0.179494	10.0065	0.0385964	0.240079	FALSE	0.0548517	9.85676	0.575372	0.81678	FALSE	0.13245	9.50811	0.244189	0.572835
ARPC3	0.141604	9.84904	0.413843	0.643455	FALSE	-0.0660464	9.38558	0.650867	0.867413	FALSE	0.0673601	9.53541	0.67755	0.883648	FALSE	0.104214	9.38955	0.515465	0.752617	FALSE	0.061725	9.49796	0.616186	0.802076	FALSE	0.136716	9.48364	0.462161	0.751217	FALSE	-0.0124742	9.84944	0.925893	0.970063	FALSE	0.0146787	9.72766	0.901623	0.967047	FALSE	0.0684882	9.51783	0.609171	0.838336	FALSE	0.307486	8.80035	0.108411	0.40461
ARPC4	0.351513	6.70373	0.00912469	0.0967317	TRUE	0.145067	6.62317	0.154083	0.491435	FALSE	0.204739	6.617	0.11037	0.47384	FALSE	0.224013	6.52613	0.0890568	0.316497	FALSE	0.154201	6.85556	0.121304	0.355415	FALSE	0.131745	6.52985	0.30374	0.639636	FALSE	0.159434	6.67126	0.178807	0.447693	FALSE	0.171583	6.71668	0.0765026	0.332385	FALSE	0.217464	6.68317	0.108675	0.411897	FALSE	0.170604	7.23715	0.247915	0.575003
ARPC5	0.0732779	8.88756	0.497357	0.708453	FALSE	0.00177324	8.78499	0.98199	0.994764	FALSE	0.11131	8.93033	0.263178	0.636547	FALSE	0.0666158	8.43852	0.573791	0.789763	FALSE	0.096031	9.1542	0.252558	0.519367	FALSE	0.0993148	8.74642	0.383721	0.696684	FALSE	-0.0394962	8.90723	0.633797	0.822823	FALSE	0.117113	9.01118	0.114683	0.393011	FALSE	-0.0372342	8.7438	0.728927	0.896299	FALSE	0.0650948	8.9971	0.571604	0.793882
ARPC5L	0.27011	6.09094	0.107633	0.316889	FALSE	0.123234	5.86462	0.366548	0.692971	FALSE	0.140928	5.75514	0.432757	0.759996	FALSE	0.479231	6.31726	0.00929104	0.107884	FALSE	0.163373	5.8661	0.242295	0.509253	FALSE	0.347767	6.24183	0.0386402	0.296392	FALSE	0.346414	6.03979	0.0211147	0.165111	FALSE	0.281364	5.9042	0.0556756	0.28663	FALSE	0.320813	6.84265	0.0415092	0.281101	FALSE	0.166486	5.76989	0.440861	0.704198
ARPIN	-0.44728	2.94324	0.0896043	0.289832	FALSE	-0.712158	2.93467	0.00481247	0.123222	FALSE	-0.734949	2.81877	0.0040939	0.154381	FALSE	-0.0105536	2.88536	0.964397	0.985274	FALSE	-0.737562	2.52272	0.000467481	0.0216006	TRUE	-0.491877	2.92312	0.0287343	0.26654	FALSE	-0.599778	2.99688	0.00345421	0.0723972	TRUE	NA	NA	NA	NA	NA	NA	NA	NA	NA	NA	NA	NA	NA	NA
ARPP19	0.596251	6.35704	1.79254e-06	0.00145689	TRUE	0.258374	6.41639	0.0014361	0.0837678	TRUE	0.375861	6.41466	0.000374457	0.0805566	TRUE	0.527264	6.48918	0.000229771	0.0191225	TRUE	0.274772	6.42803	0.000525368	0.0225674	TRUE	0.355215	6.48775	0.0004524	0.0576433	TRUE	0.346632	6.2485	0.000160006	0.0173824	TRUE	0.441928	6.37815	0.00011688	0.0166027	TRUE	0.492206	7.02069	7.29889e-05	0.0234375	TRUE	0.00195618	7.43846	0.989431	0.993699
ARRB1	-0.208341	5.7529	0.141103	0.367372	FALSE	-0.171401	6.64889	0.215861	0.555438	FALSE	-0.180758	6.53142	0.343709	0.702091	FALSE	-0.379204	5.39404	0.0201088	0.152862	FALSE	-0.345454	5.9841	0.00815087	0.0915142	TRUE	-0.285702	6.0268	0.0428387	0.309207	FALSE	-0.328376	5.78112	0.0142291	0.141733	FALSE	-0.0658198	6.05557	0.617174	0.832489	FALSE	-0.488566	5.19495	0.0143281	0.192151	FALSE	NA	NA	NA	NA
ARRB2	0.0949047	5.58922	0.666201	0.824078	FALSE	-0.198436	5.52212	0.282736	0.622679	FALSE	-0.306102	5.3311	0.240275	0.612554	FALSE	0.170505	5.48248	0.365168	0.64097	FALSE	-0.140049	5.72029	0.423532	0.663199	FALSE	-0.253265	5.23651	0.249989	0.587716	FALSE	-0.155808	5.66399	0.422023	0.672568	FALSE	-0.311162	5.42042	0.122929	0.40255	FALSE	0.413466	4.92006	0.137377	0.459441	FALSE	-0.160567	6.45874	0.447478	0.707253
ARRDC1	0.0154012	3.55312	0.928315	0.965745	FALSE	-0.221314	3.3882	0.13766	0.46963	FALSE	-0.0591834	3.32119	0.715867	0.902579	FALSE	-0.0208909	2.90185	0.913246	0.966318	FALSE	0.0256313	3.11842	0.847559	0.931279	FALSE	-0.0696029	3.44074	0.712676	0.888321	FALSE	-0.201812	3.52063	0.167448	0.432572	FALSE	-0.238597	3.48329	0.0916138	0.357166	FALSE	NA	NA	NA	NA	NA	NA	NA	NA	NA
ARRDC2	0.0220796	3.28989	0.84941	0.927877	FALSE	-0.125248	3.59388	0.238403	0.578163	FALSE	-0.0689577	3.38733	0.630671	0.86077	FALSE	-0.39979	3.69334	0.0344843	0.197306	FALSE	-0.0538549	3.66246	0.651781	0.825297	FALSE	-0.0469134	3.54616	0.769261	0.915806	FALSE	0.0364207	3.3611	0.791643	0.909758	FALSE	0.075381	3.30431	0.642508	0.845218	FALSE	NA	NA	NA	NA	NA	NA	NA	NA	NA
ARRDC3	0.718176	3.68545	0.0123022	0.111302	FALSE	0.546077	3.94734	0.0517588	0.318708	FALSE	0.378763	4.56554	0.183745	0.554059	FALSE	0.512275	4.57747	0.0453829	0.223653	FALSE	0.599479	4.44115	0.00862882	0.0945632	TRUE	0.487477	3.9197	0.0496829	0.326742	FALSE	0.325367	3.91903	0.244124	0.520342	FALSE	0.859172	3.94321	0.00322151	0.0724601	TRUE	NA	NA	NA	NA	NA	NA	NA	NA	NA
ARRDC3-AS1	-0.280313	3.15453	0.204929	0.446899	FALSE	-0.0521364	4.64206	0.78974	0.923194	FALSE	-0.107334	4.20393	0.663005	0.875917	FALSE	-0.260619	3.6322	0.143382	0.401802	FALSE	-0.00505292	4.09678	0.976391	0.988722	FALSE	-0.356026	3.94879	0.119106	0.446903	FALSE	-0.315313	3.1997	0.109675	0.34564	FALSE	-0.106651	3.84502	0.651606	0.849916	FALSE	NA	NA	NA	NA	NA	NA	NA	NA	NA
ARRDC4	0.156721	5.93087	0.436684	0.662773	FALSE	-0.0504128	6.346	0.77582	0.918137	FALSE	-0.0849181	6.21646	0.718321	0.904323	FALSE	0.370539	6.7389	0.0152081	0.133873	FALSE	-0.0225168	6.11259	0.885133	0.948364	FALSE	0.15106	6.40808	0.375344	0.690892	FALSE	0.0589592	5.66855	0.738732	0.879439	FALSE	0.00257202	5.88754	0.990535	0.995797	FALSE	0.291328	6.89867	0.0428503	0.283706	FALSE	NA	NA	NA	NA
ARSA	0.296139	4.14128	0.0768858	0.268458	FALSE	-0.0890641	3.64313	0.45222	0.755442	FALSE	0.0728479	3.78408	0.655076	0.872059	FALSE	0.150792	3.57476	0.447776	0.704159	FALSE	0.108193	3.64279	0.366216	0.619286	FALSE	0.12738	3.72996	0.417933	0.721606	FALSE	0.134321	4.15347	0.395304	0.653589	FALSE	0.13683	3.91289	0.326194	0.63308	FALSE	NA	NA	NA	NA	NA	NA	NA	NA	NA
ARSB	-0.365244	5.05868	0.00410834	0.0706814	TRUE	-0.282444	6.19227	0.00730938	0.143102	FALSE	-0.251513	5.96147	0.0503113	0.348844	FALSE	-0.295795	5.77213	0.0366253	0.2019	FALSE	-0.169423	6.18308	0.0799828	0.288608	FALSE	-0.290472	5.71694	0.0409697	0.301709	FALSE	-0.282328	5.07086	0.0215273	0.166548	FALSE	-0.0731423	5.79052	0.554607	0.796611	FALSE	-0.409668	5.62142	0.0180912	0.216166	FALSE	-0.292226	6.15829	0.171226	0.487443
ARSD	0.0297936	3.75004	0.867124	0.935988	FALSE	-0.0731723	3.85382	0.652463	0.868085	FALSE	-0.0343131	3.89912	0.851854	0.952938	FALSE	0.173941	3.26822	0.357861	0.63538	FALSE	-0.160401	3.75852	0.256522	0.522823	FALSE	-0.0348749	3.73972	0.8479	0.945386	FALSE	-0.085092	3.90217	0.581731	0.789022	FALSE	-0.0877838	3.88349	0.615276	0.831406	FALSE	NA	NA	NA	NA	NA	NA	NA	NA	NA
ARSG	0.463929	4.16493	0.0499583	0.217422	FALSE	0.382866	5.07199	0.0509694	0.317603	FALSE	0.414135	4.97676	0.139338	0.510553	FALSE	0.249763	4.15816	0.279391	0.561691	FALSE	0.5386	5.19035	0.0244751	0.15926	FALSE	0.403331	4.61459	0.0811602	0.384589	FALSE	0.39593	4.35925	0.0412235	0.220914	FALSE	0.39715	4.36363	0.0864656	0.349932	FALSE	NA	NA	NA	NA	NA	NA	NA	NA	NA
ARSK	NA	NA	NA	NA	NA	0.0932676	2.14672	0.556638	0.814612	FALSE	NA	NA	NA	NA	NA	NA	NA	NA	NA	NA	NA	NA	NA	NA	NA	NA	NA	NA	NA	NA	NA	NA	NA	NA	NA	NA	NA	NA	NA	NA	NA	NA	NA	NA	NA	NA	NA	NA	NA
ARV1	0.260768	3.44924	0.0527236	0.221871	FALSE	0.122393	3.60897	0.264911	0.605584	FALSE	-0.00543666	3.38756	0.969826	0.992473	FALSE	0.00660319	3.11302	0.971275	0.988431	FALSE	0.0453874	3.38521	0.730339	0.872851	FALSE	0.0350576	3.36731	0.774899	0.917162	FALSE	-0.0523032	3.51308	0.706937	0.86154	FALSE	-0.027405	3.47728	0.856618	0.95046	FALSE	NA	NA	NA	NA	NA	NA	NA	NA	NA
ASAH1	0.0124904	8.95775	0.91937	0.961567	FALSE	-0.190407	8.79972	0.0374743	0.280686	FALSE	-0.0935997	8.78015	0.454132	0.77147	FALSE	0.0213664	8.59457	0.876069	0.950033	FALSE	-0.231243	8.44731	0.00710959	0.0861567	TRUE	-0.149027	8.71263	0.246062	0.583415	FALSE	-0.220878	8.90397	0.0485315	0.238661	FALSE	-0.200297	8.85392	0.0458954	0.263262	FALSE	-0.141704	8.52584	0.290048	0.615185	FALSE	-0.450407	5.80799	0.269598	0.596394
ASAP1	-0.185342	8.08813	0.308878	0.553055	FALSE	-0.0590096	9.34376	0.69658	0.884806	FALSE	-0.103482	9.26316	0.547276	0.824144	FALSE	-0.238474	8.85263	0.0919641	0.322048	FALSE	0.0874207	10.0342	0.402453	0.647601	FALSE	-0.191065	8.72946	0.148322	0.481326	FALSE	-0.275599	8.19849	0.0784607	0.297467	FALSE	-0.176756	8.62331	0.24733	0.555864	FALSE	-0.152284	8.6122	0.25385	0.591873	FALSE	-0.0559404	9.84599	0.736887	0.882043
ASAP1-IT2	NA	NA	NA	NA	NA	-0.339424	2.36453	0.137122	0.469077	FALSE	-0.148534	2.2582	0.54471	0.824144	FALSE	NA	NA	NA	NA	NA	-0.173335	3.02355	0.335089	0.596747	FALSE	NA	NA	NA	NA	NA	NA	NA	NA	NA	NA	NA	NA	NA	NA	NA	NA	NA	NA	NA	NA	NA	NA	NA	NA
ASAP2	NA	NA	NA	NA	NA	NA	NA	NA	NA	NA	NA	NA	NA	NA	NA	NA	NA	NA	NA	NA	0.315463	2.53127	0.25729	0.523281	FALSE	NA	NA	NA	NA	NA	NA	NA	NA	NA	NA	NA	NA	NA	NA	NA	NA	NA	NA	NA	NA	NA	NA	NA	NA
ASB1	0.302287	3.07692	0.0140449	0.119528	FALSE	0.0102742	3.14634	0.91868	0.972821	FALSE	-0.00424002	3.09837	0.975838	0.993775	FALSE	0.258822	2.944	0.0963365	0.329565	FALSE	0.27338	3.48859	0.0265163	0.165497	FALSE	0.288798	3.08485	0.0983795	0.41726	FALSE	0.0859032	3.08168	0.525181	0.749681	FALSE	0.269692	3.104	0.0212681	0.180057	FALSE	NA	NA	NA	NA	NA	NA	NA	NA	NA
ASB13	-0.410465	2.77519	0.0101622	0.102312	FALSE	-0.345888	3.20512	0.0297981	0.256579	FALSE	-0.240567	2.86986	0.187758	0.556102	FALSE	-0.162199	2.04552	0.534289	0.765512	FALSE	-0.718734	2.41596	0.000100353	0.00985959	TRUE	-0.221567	3.03508	0.27615	0.617451	FALSE	-0.184212	3.08667	0.177872	0.446677	FALSE	NA	NA	NA	NA	NA	NA	NA	NA	NA	NA	NA	NA	NA	NA
ASB16-AS1	NA	NA	NA	NA	NA	0.11595	2.25706	0.412961	0.729131	FALSE	-0.00445736	1.87998	0.978286	0.993775	FALSE	NA	NA	NA	NA	NA	-0.22939	2.15163	0.150109	0.394631	FALSE	NA	NA	NA	NA	NA	NA	NA	NA	NA	NA	NA	NA	NA	NA	NA	NA	NA	NA	NA	NA	NA	NA	NA	NA
ASB3	-0.399862	4.8795	0.00546945	0.0782943	TRUE	-0.152341	6.24419	0.196877	0.538503	FALSE	-0.407374	5.31445	0.0091397	0.200353	FALSE	-0.269573	6.07213	0.135139	0.389211	FALSE	-0.0162391	5.32751	0.865054	0.939364	FALSE	-0.135224	5.78875	0.368358	0.6872	FALSE	-0.106412	4.70381	0.420516	0.671254	FALSE	-0.101967	5.10456	0.43174	0.71187	FALSE	-0.242731	6.22338	0.175752	0.506588	FALSE	0.00599482	5.58141	0.971284	0.986524
ASB6	-0.178394	2.61466	0.252311	0.495759	FALSE	-0.158562	2.65468	0.30197	0.6413	FALSE	-0.220306	2.68599	0.181171	0.553862	FALSE	-0.214937	2.48004	0.223416	0.501975	FALSE	-0.116562	2.50432	0.388607	0.636175	FALSE	0.109076	2.78571	0.597072	0.826623	FALSE	0.021095	2.6821	0.886536	0.954454	FALSE	NA	NA	NA	NA	NA	NA	NA	NA	NA	NA	NA	NA	NA	NA
ASB7	-0.381218	3.3849	0.000599431	0.0298278	TRUE	-0.136139	4.37259	0.0971766	0.410724	FALSE	-0.223412	4.02053	0.0394975	0.32034	FALSE	-0.335388	3.89806	0.0428691	0.21805	FALSE	-0.316281	4.05308	0.00347087	0.0578453	TRUE	-0.217685	4.09746	0.0700738	0.361763	FALSE	-0.451626	3.38404	0.000139522	0.0163571	TRUE	-0.202088	3.8877	0.0697909	0.318442	FALSE	-0.354847	4.20972	0.0439561	0.288345	FALSE	NA	NA	NA	NA
ASB8	-0.0942264	4.40156	0.534803	0.737339	FALSE	0.0440853	4.54782	0.693632	0.884236	FALSE	0.164245	4.51273	0.31784	0.683521	FALSE	-0.179615	3.54349	0.275887	0.559894	FALSE	-0.0406544	4.42703	0.717184	0.864105	FALSE	-0.00248759	4.46738	0.984777	0.994315	FALSE	-0.106257	4.51085	0.323377	0.59284	FALSE	-0.0243441	4.56176	0.834049	0.940195	FALSE	NA	NA	NA	NA	NA	NA	NA	NA	NA
ASCC1	-0.133986	3.58665	0.201254	0.442479	FALSE	0.0305642	4.42918	0.743984	0.905807	FALSE	-0.0934688	4.18373	0.408602	0.744851	FALSE	-0.310446	3.82792	0.100478	0.335483	FALSE	-0.0844591	4.12919	0.336527	0.598308	FALSE	-0.149644	4.13177	0.239965	0.578108	FALSE	0.00351065	3.64254	0.975397	0.991777	FALSE	-0.115548	3.8846	0.344335	0.649711	FALSE	NA	NA	NA	NA	NA	NA	NA	NA	NA
ASCC2	-0.169387	4.51337	0.0781285	0.270881	FALSE	-0.145065	5.05391	0.0952158	0.406461	FALSE	-0.100738	4.78133	0.333984	0.69599	FALSE	-0.399815	4.44942	0.00158528	0.0496786	TRUE	-0.166941	4.80582	0.0734181	0.277692	FALSE	-0.0853747	4.79204	0.491342	0.772279	FALSE	-0.13512	4.5954	0.17257	0.439395	FALSE	-0.166019	4.64371	0.105289	0.382322	FALSE	-0.230153	4.90617	0.140796	0.464053	FALSE	NA	NA	NA	NA
ASCC3	-0.349391	5.55706	0.0428127	0.203188	FALSE	-0.0453057	6.67988	0.727162	0.89901	FALSE	-0.0565864	6.36236	0.729757	0.907648	FALSE	-0.358114	5.73053	0.0108763	0.116427	FALSE	-0.255989	6.47465	0.0395321	0.201328	FALSE	-0.165055	6.15751	0.2798	0.619608	FALSE	-0.201622	5.50208	0.176295	0.44451	FALSE	-0.157358	6.18368	0.225536	0.532931	FALSE	-0.36444	5.84466	0.112188	0.419126	FALSE	0.0384449	6.76922	0.847702	0.9362
ASCL2	-0.259588	2.36657	0.552239	0.749928	FALSE	0.162622	1.99697	0.72941	0.899873	FALSE	-0.317006	2.37107	0.53091	0.813871	FALSE	NA	NA	NA	NA	NA	-0.0448453	2.7606	0.921195	0.966707	FALSE	NA	NA	NA	NA	NA	0.379507	3.59329	0.264697	0.539354	FALSE	NA	NA	NA	NA	NA	NA	NA	NA	NA	NA	NA	NA	NA	NA
ASF1A	-0.0282537	4.07877	0.867681	0.935988	FALSE	-0.0427417	3.90127	0.7701	0.917141	FALSE	-0.167729	3.63611	0.353946	0.708675	FALSE	0.113489	3.79277	0.608091	0.809056	FALSE	0.06376	3.83988	0.682634	0.841603	FALSE	0.189969	4.19855	0.334402	0.667059	FALSE	0.0363236	3.99948	0.809988	0.919565	FALSE	-0.122924	3.83039	0.381363	0.674785	FALSE	0.436818	4.60019	0.156222	0.487297	FALSE	NA	NA	NA	NA
ASGR1	-0.115315	2.74201	0.535399	0.737725	FALSE	-0.487477	2.51889	0.0056922	0.128816	FALSE	-0.334566	2.43142	0.150205	0.522502	FALSE	0.0187132	2.52916	0.938061	0.976727	FALSE	NA	NA	NA	NA	NA	NA	NA	NA	NA	NA	NA	NA	NA	NA	NA	NA	NA	NA	NA	NA	NA	NA	NA	NA	NA	NA	NA	NA	NA
ASH1L	-0.285162	6.87747	0.0582926	0.234482	FALSE	-0.170253	8.14363	0.0505488	0.317105	FALSE	-0.324873	7.82417	0.00701302	0.181993	FALSE	-0.186502	8.11413	0.164023	0.430526	FALSE	-0.112014	8.21375	0.231877	0.49725	FALSE	-0.0933476	7.82115	0.468027	0.75502	FALSE	-0.227454	6.87675	0.0787716	0.298224	FALSE	-0.208986	7.38328	0.0598202	0.297295	FALSE	-0.0746593	8.24052	0.526707	0.789395	FALSE	-0.376497	8.4561	0.00195213	0.0819864
ASH1L-AS1	NA	NA	NA	NA	NA	NA	NA	NA	NA	NA	NA	NA	NA	NA	NA	0.914325	1.98402	0.000269987	0.0206861	TRUE	NA	NA	NA	NA	NA	NA	NA	NA	NA	NA	NA	NA	NA	NA	NA	NA	NA	NA	NA	NA	NA	NA	NA	NA	NA	NA	NA	NA	NA
ASH2L	-0.182722	3.97623	0.158917	0.391149	FALSE	0.0141263	4.64457	0.880554	0.95848	FALSE	-0.0666661	4.4025	0.643453	0.865559	FALSE	-0.469191	3.58383	0.00792331	0.099469	TRUE	-0.312746	4.47061	0.00281234	0.0528092	TRUE	-0.280082	4.37645	0.0191169	0.223127	FALSE	-0.251422	4.02236	0.0437061	0.226938	FALSE	-0.143525	4.32182	0.296797	0.604532	FALSE	NA	NA	NA	NA	NA	NA	NA	NA	NA
ASL	-0.00566721	4.09616	0.957321	0.980081	FALSE	0.0202486	4.00207	0.809787	0.932466	FALSE	0.0474336	3.99686	0.677632	0.883648	FALSE	-0.0391855	3.939	0.813969	0.926329	FALSE	0.0170699	3.9339	0.853902	0.933956	FALSE	-0.00409662	3.9246	0.974976	0.991519	FALSE	-0.0693701	4.11549	0.555632	0.772737	FALSE	-0.0172807	4.06576	0.864626	0.954662	FALSE	NA	NA	NA	NA	NA	NA	NA	NA	NA
ASMTL	-0.114561	2.65145	0.442926	0.667159	FALSE	-0.226707	2.89196	0.0865572	0.388722	FALSE	-0.242881	2.85177	0.173473	0.547343	FALSE	-0.217688	3.6551	0.274236	0.558904	FALSE	-0.0951456	3.71881	0.481765	0.706002	FALSE	0.0650228	2.85194	0.648323	0.853612	FALSE	-0.107403	2.83624	0.549926	0.768673	FALSE	NA	NA	NA	NA	NA	NA	NA	NA	NA	NA	-0.181443	6.89808	0.459646	0.715483
ASMTL-AS1	NA	NA	NA	NA	NA	-0.294551	2.24134	0.0684767	0.35489	FALSE	NA	NA	NA	NA	NA	NA	NA	NA	NA	NA	-0.326856	2.01213	0.189135	0.444941	FALSE	NA	NA	NA	NA	NA	NA	NA	NA	NA	NA	NA	NA	NA	NA	NA	NA	NA	NA	NA	NA	NA	NA	NA	NA
ASNSD1	0.190758	3.99503	0.12198	0.337686	FALSE	0.194741	3.89623	0.126029	0.454276	FALSE	0.349811	3.90853	0.0108212	0.213676	FALSE	0.278876	3.46531	0.0594473	0.257947	FALSE	0.199813	3.88285	0.0517784	0.231403	FALSE	0.241243	3.91278	0.0674495	0.359183	FALSE	0.189317	3.94134	0.134262	0.385077	FALSE	0.285233	3.98639	0.0129652	0.141502	FALSE	NA	NA	NA	NA	NA	NA	NA	NA	NA
ASPH	-0.231898	7.00355	0.232623	0.476263	FALSE	-0.19613	7.89181	0.294509	0.634605	FALSE	-0.255424	7.53759	0.269434	0.64116	FALSE	-0.0967886	7.78004	0.675827	0.851888	FALSE	-0.0284234	9.14478	0.896202	0.95464	FALSE	0.057322	7.93504	0.787163	0.921925	FALSE	-0.269418	6.95384	0.106969	0.342898	FALSE	-0.231485	7.36643	0.200646	0.503214	FALSE	0.161544	8.48958	0.475526	0.755032	FALSE	0.276717	6.3472	0.419733	0.693501
ASPHD1	NA	NA	NA	NA	NA	0.316372	2.00683	0.0846158	0.385448	FALSE	NA	NA	NA	NA	NA	NA	NA	NA	NA	NA	0.51351	2.47127	0.00202145	0.0463811	TRUE	NA	NA	NA	NA	NA	NA	NA	NA	NA	NA	NA	NA	NA	NA	NA	NA	NA	NA	NA	NA	NA	NA	NA	NA
ASPSCR1	-0.198447	3.85999	0.203162	0.444767	FALSE	-0.138048	3.86281	0.260621	0.601925	FALSE	0.012117	3.75138	0.931129	0.982617	FALSE	-0.28704	3.46159	0.0292813	0.183798	FALSE	-0.195921	3.742	0.129378	0.366295	FALSE	-0.0704161	3.71652	0.656107	0.858159	FALSE	-0.18794	3.85439	0.232643	0.507611	FALSE	-0.295913	3.74347	0.0826517	0.342559	FALSE	NA	NA	NA	NA	NA	NA	NA	NA	NA
ASRGL1	-0.820164	3.85219	0.00129502	0.0421012	TRUE	-0.733159	3.97727	0.000841851	0.0691167	TRUE	-0.894824	3.47252	0.00400531	0.153901	FALSE	-0.626541	3.64677	0.00418262	0.0746072	TRUE	-0.707163	3.14165	0.00192474	0.0449512	TRUE	-0.782957	3.86365	0.00241637	0.103588	FALSE	-0.719849	3.77645	0.000964304	0.0397951	TRUE	-0.672397	3.69057	0.00346466	0.0732501	TRUE	NA	NA	NA	NA	NA	NA	NA	NA	NA
ASTE1	NA	NA	NA	NA	NA	-0.129125	2.26329	0.239271	0.579228	FALSE	-0.0465471	1.98701	0.790232	0.935581	FALSE	NA	NA	NA	NA	NA	NA	NA	NA	NA	NA	NA	NA	NA	NA	NA	NA	NA	NA	NA	NA	NA	NA	NA	NA	NA	NA	NA	NA	NA	NA	NA	NA	NA	NA
ASXL1	0.274128	5.68943	0.0201038	0.142977	FALSE	0.00939807	6.13331	0.889745	0.962641	FALSE	-0.0114106	6.06447	0.887307	0.966697	FALSE	0.246203	6.41206	0.0695538	0.279463	FALSE	0.111664	6.29735	0.152487	0.397767	FALSE	0.138517	5.99068	0.225342	0.563536	FALSE	0.169215	5.63275	0.0649025	0.272847	FALSE	0.235575	5.82848	0.00722362	0.109601	FALSE	0.150854	6.32175	0.304032	0.625263	FALSE	0.10111	7.04125	0.519579	0.762142
ASXL2	-0.443875	5.55589	0.00617979	0.0823703	TRUE	-0.0985136	6.709	0.267659	0.607137	FALSE	-0.122428	6.29739	0.353227	0.708269	FALSE	-0.488544	5.71687	0.00116397	0.0442079	TRUE	-0.120476	6.5828	0.189735	0.445544	FALSE	-0.150356	6.27821	0.249772	0.58754	FALSE	-0.221741	5.51925	0.100897	0.33495	FALSE	-0.126783	6.06953	0.309673	0.617098	FALSE	-0.35921	6.24325	0.0267954	0.239957	FALSE	-0.198044	6.32106	0.257382	0.586455
ATAD1	0.14531	5.06125	0.0825398	0.277398	FALSE	0.033536	5.61807	0.637629	0.859896	FALSE	0.106338	5.48393	0.258244	0.630323	FALSE	0.0338214	5.29913	0.703775	0.868163	FALSE	-0.0558207	5.53021	0.545859	0.755068	FALSE	0.0841954	5.46447	0.431292	0.728259	FALSE	-0.0386739	4.86734	0.687173	0.850094	FALSE	0.0907576	5.35565	0.299055	0.605465	FALSE	-0.0593287	5.64878	0.579497	0.818346	FALSE	NA	NA	NA	NA
ATAD2	-0.326071	2.45852	0.0542303	0.225451	FALSE	-0.129935	3.08918	0.253557	0.594494	FALSE	-0.401266	2.73402	0.01959	0.255176	FALSE	-0.0131646	2.76941	0.935612	0.975632	FALSE	-0.318707	2.90721	0.0363208	0.192943	FALSE	-0.114047	2.91118	0.469373	0.755841	FALSE	-0.00317919	2.33369	0.983599	0.994435	FALSE	NA	NA	NA	NA	NA	NA	NA	NA	NA	NA	NA	NA	NA	NA
ATAD2B	-0.329409	5.01117	0.0317748	0.174318	FALSE	-0.0392023	6.39486	0.585765	0.832785	FALSE	-0.137525	6.00777	0.212304	0.582245	FALSE	-0.335912	5.59518	0.0170858	0.141569	FALSE	-0.163047	6.1987	0.0721017	0.274649	FALSE	-0.12497	5.81173	0.299562	0.636182	FALSE	-0.184702	5.10765	0.184209	0.452683	FALSE	-0.0887756	5.6137	0.416473	0.698936	FALSE	-0.331288	5.64702	0.0491131	0.301033	FALSE	-0.346753	6.96664	0.0554911	0.308647
ATAD3A	0.106673	2.50975	0.511657	0.719566	FALSE	0.216298	2.46014	0.138226	0.470186	FALSE	0.265832	2.42538	0.0843262	0.43483	FALSE	-0.0978821	2.25557	0.558679	0.780986	FALSE	0.241432	2.61375	0.101405	0.324589	FALSE	0.271745	2.55749	0.122193	0.450257	FALSE	-0.190484	2.46802	0.326305	0.594749	FALSE	NA	NA	NA	NA	NA	NA	NA	NA	NA	NA	NA	NA	NA	NA
ATAD3B	0.157921	2.55932	0.293378	0.538956	FALSE	0.0497878	2.81496	0.641626	0.861821	FALSE	0.202893	2.58971	0.235239	0.605652	FALSE	-0.0637506	2.63028	0.734469	0.885287	FALSE	0.0934041	2.97397	0.482206	0.706208	FALSE	0.261024	2.74175	0.118769	0.446552	FALSE	NA	NA	NA	NA	NA	NA	NA	NA	NA	NA	NA	NA	NA	NA	NA	NA	NA	NA	NA
ATAD5	-0.295732	2.02178	0.057395	0.232754	FALSE	0.0705582	2.9213	0.530689	0.800663	FALSE	-0.0203443	2.49719	0.910949	0.974754	FALSE	-0.262974	2.27996	0.195799	0.471501	FALSE	-0.278524	2.90357	0.0705439	0.272104	FALSE	-0.463796	2.4964	0.0128723	0.188511	FALSE	NA	NA	NA	NA	NA	NA	NA	NA	NA	NA	NA	NA	NA	NA	NA	NA	NA	NA	NA
ATAT1	NA	NA	NA	NA	NA	-0.137351	2.31694	0.206456	0.547405	FALSE	NA	NA	NA	NA	NA	NA	NA	NA	NA	NA	NA	NA	NA	NA	NA	NA	NA	NA	NA	NA	NA	NA	NA	NA	NA	NA	NA	NA	NA	NA	NA	NA	NA	NA	NA	NA	NA	NA	NA
ATE1	-0.283369	4.71686	0.0321973	0.175529	FALSE	-0.0702131	5.66678	0.370362	0.695992	FALSE	0.0135261	5.34739	0.91572	0.976457	FALSE	-0.315431	4.63062	0.0169187	0.141536	FALSE	-0.240394	5.49683	0.00639378	0.0813769	TRUE	-0.207227	5.36867	0.0449996	0.31651	FALSE	-0.138943	4.69537	0.148267	0.405957	FALSE	0.0128901	5.15605	0.895012	0.964462	FALSE	-0.379039	5.12735	0.00796376	0.148488	FALSE	-0.102201	5.48296	0.631731	0.829526
ATF1	-0.074515	4.40127	0.405528	0.636377	FALSE	-0.0829411	4.89293	0.108047	0.427446	FALSE	-0.13087	4.74183	0.0918155	0.448208	FALSE	-0.0897651	4.73262	0.400404	0.670512	FALSE	-0.0301751	4.9766	0.714423	0.861858	FALSE	-0.234297	4.74346	0.0122836	0.185957	FALSE	-0.085658	4.36026	0.318824	0.589571	FALSE	-0.0457608	4.56036	0.671458	0.859226	FALSE	-0.311777	4.91978	0.00864729	0.153317	FALSE	NA	NA	NA	NA
ATF2	-0.0894531	4.91464	0.361116	0.597278	FALSE	-0.10615	5.67046	0.143375	0.477965	FALSE	-0.1134	5.50657	0.32263	0.68741	FALSE	0.0334911	5.74206	0.762248	0.900949	FALSE	-0.0611766	5.7073	0.411175	0.65329	FALSE	-0.0637732	5.48416	0.475153	0.759445	FALSE	-0.141262	4.86715	0.126862	0.373182	FALSE	-0.0652681	5.25795	0.502571	0.762827	FALSE	0.00419796	5.75477	0.972404	0.991566	FALSE	-0.169491	5.99593	0.287355	0.607954
ATF3	0.0468197	5.90931	0.878836	0.942175	FALSE	-0.257886	6.18802	0.389946	0.712804	FALSE	-0.212038	5.67089	0.589919	0.843082	FALSE	0.260529	8.12396	0.174124	0.443713	FALSE	0.362982	7.47824	0.040682	0.203924	FALSE	0.26734	6.22224	0.343264	0.671139	FALSE	-0.0986452	5.51456	0.750178	0.886048	FALSE	0.0715753	6.67186	0.793126	0.92275	FALSE	-0.0506725	7.91979	0.833039	0.9385	FALSE	0.241238	7.73522	0.383645	0.671042
ATF4	0.379047	6.46204	0.0406081	0.198059	FALSE	0.0165413	6.52481	0.895738	0.963514	FALSE	0.1751	6.32347	0.248205	0.620145	FALSE	0.330665	7.47032	0.0299815	0.186045	FALSE	0.249635	6.42743	0.0292444	0.173076	FALSE	0.404771	6.88857	0.00610876	0.140373	FALSE	0.178858	6.1194	0.207438	0.478101	FALSE	0.243139	6.419	0.154845	0.448089	FALSE	0.0659809	7.84474	0.595378	0.831162	FALSE	0.164514	7.0337	0.268371	0.594774
ATF5	-0.275622	5.41522	0.254702	0.497562	FALSE	-0.109769	5.15625	0.632246	0.856829	FALSE	-0.0723044	5.548	0.782502	0.932236	FALSE	-0.310177	4.87113	0.0601051	0.259376	FALSE	-0.180902	5.83872	0.405375	0.649438	FALSE	-0.107483	5.21088	0.648832	0.853633	FALSE	-0.00963219	5.63003	0.965119	0.988009	FALSE	0.0727163	6.00482	0.74032	0.895264	FALSE	-0.41894	4.95947	0.0693039	0.347966	FALSE	0.195213	7.23824	0.411744	0.68858
ATF6	-0.153114	5.80159	0.124096	0.341219	FALSE	-0.0792763	6.67298	0.279943	0.619551	FALSE	-0.0895138	6.44328	0.343037	0.701377	FALSE	-0.333176	6.14849	0.0189163	0.148591	FALSE	-0.0226362	6.7688	0.7501	0.884109	FALSE	-0.0886018	6.2619	0.371034	0.689509	FALSE	-0.213026	5.80441	0.0204141	0.163896	FALSE	-0.263747	6.15987	0.011422	0.133493	FALSE	-0.234219	6.1706	0.0590388	0.320862	FALSE	-0.169748	6.98479	0.225484	0.550746
ATF6B	0.00672912	3.50107	0.958722	0.980458	FALSE	0.0277784	4.05182	0.775172	0.917964	FALSE	-0.0742428	3.78088	0.642949	0.865184	FALSE	0.0963168	3.32044	0.538372	0.767717	FALSE	-0.0977402	4.06509	0.32066	0.58325	FALSE	-0.144605	3.68711	0.377208	0.692292	FALSE	-0.104603	3.51891	0.477613	0.719392	FALSE	0.0167576	3.69159	0.902802	0.967047	FALSE	NA	NA	NA	NA	NA	NA	NA	NA	NA
ATF7	-0.0729497	5.33285	0.395044	0.626798	FALSE	-0.153213	6.11373	0.0329213	0.268207	FALSE	-0.014183	5.96855	0.8791	0.964681	FALSE	-0.253378	5.46348	0.0606926	0.260514	FALSE	-0.0849528	6.24402	0.296859	0.562058	FALSE	-0.203913	5.87186	0.0357615	0.287577	FALSE	-0.158071	5.33656	0.0709263	0.283673	FALSE	-0.085717	5.77999	0.343166	0.648295	FALSE	-0.253702	5.871	0.0832115	0.368784	FALSE	-0.357957	6.34374	0.0359568	0.260877
ATF7IP	-0.334227	4.70887	0.00684287	0.0860114	TRUE	-0.292404	5.75797	0.000960384	0.0738609	TRUE	-0.321733	5.42614	0.0100207	0.209587	FALSE	-0.189741	5.50109	0.129318	0.381319	FALSE	-0.18734	5.92328	0.0375815	0.1961	FALSE	-0.236885	5.23541	0.167663	0.505302	FALSE	-0.323572	4.66907	0.0267886	0.184892	FALSE	-0.299792	5.0563	0.00989719	0.125343	FALSE	-0.234554	5.34908	0.186146	0.515315	FALSE	-0.181384	6.61439	0.387855	0.67279
ATF7IP2	0.348734	4.36408	0.0483318	0.215398	FALSE	0.0172579	5.04885	0.907667	0.969159	FALSE	-0.044588	5.25436	0.844105	0.951083	FALSE	0.161376	5.57055	0.577719	0.792118	FALSE	-0.00147867	5.33886	0.99346	0.996567	FALSE	0.185865	4.90327	0.319432	0.653383	FALSE	0.255345	4.31177	0.102108	0.336423	FALSE	-0.00384649	4.71489	0.982963	0.993197	FALSE	NA	NA	NA	NA	NA	-0.421006	6.40785	0.202244	0.523674
ATG10	-0.0752102	3.25126	0.621997	0.795794	FALSE	0.180339	4.32268	0.214665	0.553763	FALSE	0.161955	3.93327	0.439538	0.764126	FALSE	-0.173592	3.08456	0.280612	0.562856	FALSE	-0.141854	3.74378	0.420531	0.660981	FALSE	0.0243971	3.77972	0.883884	0.961664	FALSE	-0.544244	3.23292	0.00984189	0.122419	FALSE	-0.247035	3.73641	0.157317	0.450909	FALSE	NA	NA	NA	NA	NA	NA	NA	NA	NA
ATG101	0.0320356	5.21171	0.814314	0.908832	FALSE	0.0233696	4.82905	0.839541	0.944105	FALSE	0.0346388	4.82289	0.797657	0.938137	FALSE	-0.0370714	5.221	0.78484	0.911866	FALSE	0.207374	4.89227	0.0464834	0.217448	FALSE	0.209364	5.15134	0.0953495	0.412415	FALSE	0.0435497	5.03608	0.742196	0.881997	FALSE	0.00628723	4.98103	0.95537	0.984359	FALSE	-0.161862	5.58791	0.344079	0.660598	FALSE	0.198091	5.351	0.417368	0.692881
ATG12	0.374752	5.97545	0.00660583	0.08556	TRUE	0.119794	6.04641	0.293834	0.634293	FALSE	0.180287	6.00629	0.201979	0.571992	FALSE	0.0911152	6.05572	0.460721	0.714154	FALSE	0.127576	6.15211	0.177368	0.429666	FALSE	0.179754	6.15705	0.124993	0.455872	FALSE	0.180582	5.84998	0.133017	0.382919	FALSE	0.228667	6.06095	0.0515574	0.279125	FALSE	0.187772	6.51042	0.168433	0.499578	FALSE	-0.0797539	6.19126	0.610586	0.819012
ATG13	-0.135649	3.97677	0.190867	0.430143	FALSE	-0.250495	4.64396	0.00777588	0.145673	FALSE	-0.183972	4.44922	0.148826	0.520943	FALSE	-0.29126	4.36433	0.0341175	0.196941	FALSE	-0.161414	4.68411	0.0515301	0.23085	FALSE	-0.0912748	4.4384	0.390675	0.701729	FALSE	-0.180501	3.95698	0.0598869	0.26195	FALSE	0.0206988	4.23767	0.860625	0.952187	FALSE	-0.340036	4.50744	0.0820598	0.367679	FALSE	NA	NA	NA	NA
ATG14	-0.130365	4.00704	0.210396	0.453313	FALSE	-0.0921706	4.73824	0.214238	0.553763	FALSE	-0.0820487	4.48292	0.355328	0.709817	FALSE	-0.16908	4.50332	0.201561	0.476765	FALSE	-0.161168	4.75731	0.0591444	0.247679	FALSE	-0.0372909	4.51162	0.731418	0.897929	FALSE	-0.251486	3.924	0.0289873	0.191761	FALSE	-0.154296	4.2677	0.186857	0.490468	FALSE	-0.410371	4.76537	0.00409272	0.114241	FALSE	NA	NA	NA	NA
ATG16L1	-0.323778	2.56968	0.0481853	0.215398	FALSE	-0.0510007	3.5589	0.614037	0.850323	FALSE	0.0158533	3.23299	0.914127	0.976273	FALSE	-0.280754	2.87947	0.0793258	0.299784	FALSE	-0.0855393	3.4913	0.445125	0.679656	FALSE	-0.0232532	3.21619	0.849017	0.945552	FALSE	-0.164903	2.65589	0.273855	0.548655	FALSE	NA	NA	NA	NA	NA	NA	NA	NA	NA	NA	NA	NA	NA	NA
ATG16L2	-0.111106	3.8411	0.44338	0.667226	FALSE	-0.0581544	4.58049	0.652079	0.868045	FALSE	-0.00786771	4.13071	0.962096	0.990761	FALSE	-0.0571053	3.89292	0.652061	0.838072	FALSE	-0.138163	4.19513	0.154027	0.399474	FALSE	-0.0396878	4.23574	0.766026	0.91397	FALSE	-0.29591	3.85491	0.0348191	0.205377	FALSE	-0.108122	4.03155	0.438988	0.718311	FALSE	NA	NA	NA	NA	NA	NA	NA	NA	NA
ATG2A	-0.19505	2.04273	0.155562	0.386718	FALSE	-0.288636	2.42694	0.0309648	0.260897	FALSE	-0.247549	2.26083	0.117707	0.483689	FALSE	-0.364913	3.13256	0.0851483	0.310197	FALSE	-0.192459	2.53964	0.195594	0.45284	FALSE	NA	NA	NA	NA	NA	NA	NA	NA	NA	NA	NA	NA	NA	NA	NA	NA	NA	NA	NA	NA	NA	NA	NA	NA
ATG2B	-0.276449	3.02118	0.0192428	0.140296	FALSE	-0.122417	4.02203	0.169917	0.506912	FALSE	-0.0189512	3.69911	0.866947	0.959449	FALSE	-0.427259	3.42399	0.0217844	0.161141	FALSE	-0.246591	3.82425	0.0179505	0.139301	FALSE	-0.294193	3.63596	0.0647028	0.352909	FALSE	-0.280468	3.14773	0.0288513	0.191296	FALSE	-0.143808	3.35793	0.267524	0.575963	FALSE	NA	NA	NA	NA	NA	NA	NA	NA	NA
ATG3	-0.211641	6.38633	0.179625	0.415828	FALSE	-0.206052	6.41824	0.136218	0.468223	FALSE	-0.143636	6.37998	0.391338	0.73364	FALSE	-0.320308	6.21343	0.0350034	0.198419	FALSE	-0.350248	6.40687	0.0101488	0.1029	FALSE	-0.219463	6.32993	0.137559	0.46948	FALSE	-0.228506	6.34062	0.0699541	0.282375	FALSE	-0.177479	6.68753	0.19766	0.500056	FALSE	-0.221747	6.34335	0.170993	0.502728	FALSE	-0.237457	6.66089	0.214782	0.537334
ATG4A	0.0124887	3.99299	0.924703	0.963941	FALSE	-0.0415775	4.1407	0.731739	0.90083	FALSE	0.170966	3.8905	0.160837	0.532312	FALSE	0.158408	4.20267	0.190369	0.465318	FALSE	0.0381847	3.63457	0.72252	0.867493	FALSE	0.0623282	3.90337	0.719902	0.892122	FALSE	-0.0857385	3.90901	0.470947	0.71391	FALSE	0.0244188	3.95211	0.835209	0.940195	FALSE	0.275225	4.22951	0.114931	0.42123	FALSE	NA	NA	NA	NA
ATG4B	-0.0567524	4.29361	0.56212	0.757605	FALSE	-0.118238	4.82194	0.18495	0.525142	FALSE	-0.207254	4.39297	0.0158044	0.235121	FALSE	-0.157899	4.8099	0.260029	0.543948	FALSE	-0.138175	4.7203	0.0882916	0.303516	FALSE	-0.162496	4.6289	0.147641	0.479631	FALSE	-0.0181263	4.17402	0.855111	0.940547	FALSE	0.197479	4.34937	0.0536655	0.283538	FALSE	0.0178477	5.07167	0.887316	0.960788	FALSE	NA	NA	NA	NA
ATG4C	-0.00660851	2.84212	0.969125	0.985	FALSE	0.0752356	3.60137	0.578217	0.828449	FALSE	0.304339	3.01357	0.141112	0.511595	FALSE	0.0932948	2.59878	0.67498	0.851888	FALSE	0.0409594	3.42901	0.78203	0.902469	FALSE	-0.112397	3.00828	0.648705	0.853633	FALSE	NA	NA	NA	NA	NA	NA	NA	NA	NA	NA	NA	NA	NA	NA	NA	NA	NA	NA	NA
ATG4D	0.0613374	2.6527	0.701881	0.846153	FALSE	0.131418	2.62282	0.25503	0.59632	FALSE	-0.0719878	2.65913	0.572348	0.83484	FALSE	0.0693254	2.44666	0.707489	0.869669	FALSE	0.0770303	2.85569	0.539219	0.749981	FALSE	0.127975	2.8169	0.442507	0.736628	FALSE	0.102397	2.62881	0.548327	0.767858	FALSE	NA	NA	NA	NA	NA	NA	NA	NA	NA	NA	NA	NA	NA	NA
ATG5	0.0543483	5.99186	0.525081	0.729608	FALSE	0.0282643	6.55318	0.666072	0.875883	FALSE	0.0116407	6.31472	0.900683	0.970931	FALSE	-0.0106867	6.3722	0.926064	0.972467	FALSE	0.107529	6.567	0.10156	0.324734	FALSE	0.107246	6.39627	0.248691	0.586339	FALSE	0.0658852	5.94773	0.385774	0.645225	FALSE	0.132587	6.17215	0.138954	0.425691	FALSE	0.0884763	6.62239	0.384965	0.693392	FALSE	0.0160114	6.59285	0.913875	0.962447
ATG7	-0.281476	6.82567	0.188618	0.427415	FALSE	0.0174694	8.26761	0.882532	0.959211	FALSE	-0.271576	7.92447	0.144048	0.514333	FALSE	-0.237371	6.91828	0.156488	0.419999	FALSE	0.0272387	7.97255	0.863288	0.938594	FALSE	-0.209162	7.52592	0.210258	0.547856	FALSE	-0.307967	6.9005	0.0703785	0.282909	FALSE	-0.237632	7.39389	0.179369	0.479432	FALSE	-0.0826329	6.94089	0.602486	0.834555	FALSE	0.180008	7.05104	0.395849	0.67839
ATG9A	0.125739	2.36452	0.366443	0.601442	FALSE	0.00151954	2.65604	0.990681	0.997747	FALSE	0.0939042	2.62237	0.591714	0.843564	FALSE	-0.138504	2.31082	0.564286	0.784055	FALSE	-0.0664488	3.06548	0.619119	0.803506	FALSE	-0.227305	2.67366	0.190266	0.529865	FALSE	-0.0676341	2.49153	0.675582	0.845153	FALSE	NA	NA	NA	NA	NA	NA	NA	NA	NA	NA	NA	NA	NA	NA
ATIC	-0.133576	4.02482	0.325555	0.567111	FALSE	-0.225718	4.05735	0.0344358	0.270075	FALSE	-0.110623	3.85559	0.43988	0.764327	FALSE	-0.157065	3.3979	0.370319	0.645523	FALSE	-0.37852	3.45659	0.0172932	0.138432	FALSE	0.0126777	3.7641	0.929487	0.980202	FALSE	-0.415081	4.02208	0.00271529	0.0643333	TRUE	-0.101694	4.077	0.403231	0.690464	FALSE	NA	NA	NA	NA	NA	NA	NA	NA	NA
ATL1	-0.142729	4.53331	0.260644	0.504078	FALSE	-0.23011	5.00181	0.0584793	0.336582	FALSE	-0.546114	4.45813	0.00153525	0.102663	FALSE	0.0937169	5.62298	0.524451	0.759127	FALSE	-0.205014	4.0367	0.207387	0.469303	FALSE	0.0405015	4.97551	0.797264	0.92607	FALSE	0.0113883	4.75374	0.920685	0.96658	FALSE	-0.215529	4.51457	0.111315	0.38928	FALSE	-0.0428729	5.56975	0.767875	0.911359	FALSE	NA	NA	NA	NA
ATL2	-0.151511	3.40802	0.168841	0.403362	FALSE	-0.0848928	4.29551	0.373595	0.698702	FALSE	-0.108121	4.09345	0.352106	0.707389	FALSE	-0.379903	3.78263	0.0161075	0.137981	FALSE	0.000645438	4.4511	0.994754	0.997034	FALSE	-0.264728	4.02704	0.0648533	0.353125	FALSE	-0.31707	3.42494	0.0102754	0.124305	FALSE	-0.194813	3.70844	0.122774	0.402383	FALSE	NA	NA	NA	NA	NA	NA	NA	NA	NA
ATL3	0.0231434	5.6855	0.82073	0.912895	FALSE	-0.0425472	6.12093	0.582294	0.830633	FALSE	0.00783976	6.03973	0.93907	0.983981	FALSE	-0.144143	5.57544	0.257902	0.540743	FALSE	-0.0514922	5.88763	0.52974	0.74216	FALSE	-0.0195269	5.9847	0.841421	0.943091	FALSE	-0.145088	5.73837	0.0469071	0.234363	FALSE	0.0880363	5.98398	0.295243	0.603113	FALSE	0.0479615	6.03595	0.720445	0.893202	FALSE	-0.195621	5.76216	0.378096	0.666773
ATM	-0.330664	4.96259	0.0286374	0.166441	FALSE	-0.0186902	6.07316	0.866299	0.953675	FALSE	-0.105764	5.53663	0.516741	0.806186	FALSE	-0.143171	4.63447	0.291814	0.573586	FALSE	-0.236427	5.62567	0.0563871	0.241997	FALSE	-0.294543	5.35784	0.0546041	0.334059	FALSE	-0.27131	4.96785	0.0556994	0.253677	FALSE	-0.24708	5.2797	0.0796056	0.338669	FALSE	-0.256161	4.69292	0.238124	0.575641	FALSE	NA	NA	NA	NA
ATMIN	0.0726492	4.29145	0.45765	0.679888	FALSE	0.242624	4.56171	0.0085296	0.152854	FALSE	0.256233	4.48485	0.02446	0.27774	FALSE	0.0463352	4.00152	0.717462	0.875648	FALSE	0.158004	4.43714	0.0784736	0.285698	FALSE	0.247763	4.57907	0.0294265	0.269371	FALSE	0.254944	4.36204	0.0321367	0.199005	FALSE	0.229019	4.48774	0.00556559	0.0948603	TRUE	-0.0787219	4.60164	0.665804	0.867331	FALSE	NA	NA	NA	NA
ATN1	0.115472	4.72475	0.290756	0.536182	FALSE	0.0381833	5.11363	0.653699	0.869001	FALSE	0.161309	5.00047	0.143788	0.513916	FALSE	0.205685	4.71434	0.0960504	0.329333	FALSE	0.0385441	4.92405	0.669735	0.835822	FALSE	0.134709	5.03182	0.202621	0.543362	FALSE	0.198817	4.74103	0.0860808	0.311945	FALSE	0.401906	5.02906	0.000390645	0.0274801	TRUE	0.228406	5.15333	0.105512	0.405307	FALSE	NA	NA	NA	NA
ATOX1	0.249401	8.98086	0.186194	0.425069	FALSE	0.0955939	8.55946	0.564425	0.819554	FALSE	0.156728	8.76099	0.365883	0.719425	FALSE	0.0145868	8.20715	0.931958	0.974631	FALSE	0.109062	8.50308	0.471358	0.698151	FALSE	0.0646026	8.61862	0.759908	0.911177	FALSE	0.189077	9.08717	0.234926	0.510422	FALSE	0.180828	8.88417	0.206512	0.511194	FALSE	-0.0870287	8.1272	0.619381	0.84335	FALSE	0.287768	8.53389	0.0742271	0.346625
ATP10A	-0.326147	5.47682	0.239241	0.482688	FALSE	-0.0963923	7.04944	0.724618	0.898119	FALSE	-0.546619	5.41972	0.139377	0.510553	FALSE	-0.111943	6.00344	0.637972	0.828599	FALSE	-0.393572	4.53026	0.242706	0.50956	FALSE	-0.077866	5.87722	0.739539	0.902342	FALSE	-0.214658	5.296	0.475576	0.717926	FALSE	0.0245469	6.4675	0.922703	0.973815	FALSE	0.037697	6.25131	0.863299	0.951357	FALSE	NA	NA	NA	NA
ATP10D	-0.281751	3.76867	0.0229725	0.152415	FALSE	-0.0682407	4.61428	0.488266	0.778562	FALSE	0.053987	4.27429	0.680286	0.886079	FALSE	-0.291713	3.85283	0.0556469	0.250454	FALSE	-0.0837046	4.81276	0.415454	0.657374	FALSE	-0.276498	4.22358	0.0651253	0.353945	FALSE	-0.350281	3.70921	0.0153146	0.145773	FALSE	-0.254459	4.33642	0.0378934	0.237493	FALSE	NA	NA	NA	NA	NA	NA	NA	NA	NA
ATP11A	-0.378387	5.26396	0.00979384	0.100865	FALSE	-0.159759	6.42276	0.0496938	0.316082	FALSE	-0.209832	6.0196	0.0521745	0.354437	FALSE	-0.437755	5.65057	0.0128232	0.124115	FALSE	-0.419492	6.1955	3.57625e-05	0.00649259	TRUE	-0.360326	5.90001	0.00357297	0.120207	FALSE	-0.290799	5.24725	0.0168329	0.150401	FALSE	-0.204046	5.80843	0.100473	0.374137	FALSE	-0.468255	5.77559	0.00728644	0.142486	FALSE	NA	NA	NA	NA
ATP11B	-0.143499	5.89599	0.238769	0.482407	FALSE	-0.137266	6.99378	0.0982246	0.412618	FALSE	-0.2077	6.63987	0.084466	0.43483	FALSE	0.031654	7.06724	0.826539	0.929253	FALSE	-0.137438	6.73053	0.14869	0.392496	FALSE	-0.0295385	6.6629	0.799362	0.927333	FALSE	-0.154071	5.81909	0.179336	0.44816	FALSE	-0.0527906	6.27287	0.656148	0.851892	FALSE	-0.0156383	7.06463	0.900992	0.966072	FALSE	-0.0104193	5.98162	0.9592	0.980567
ATP11C	-0.205339	4.19011	0.0873477	0.286125	FALSE	-0.109555	5.23168	0.217718	0.558607	FALSE	-0.194776	5.14084	0.106683	0.469091	FALSE	-0.219374	4.95138	0.252487	0.535011	FALSE	-0.241769	5.31352	0.0628194	0.255797	FALSE	-0.196891	4.9909	0.0968015	0.415328	FALSE	-0.258478	4.28089	0.0149512	0.144318	FALSE	-0.200442	4.75723	0.105448	0.382359	FALSE	-0.381157	5.07086	0.0320634	0.254081	FALSE	-0.465618	6.68219	0.0538878	0.303736
ATP13A1	0.0084388	3.07697	0.948904	0.975845	FALSE	-0.0279876	3.12786	0.783829	0.920735	FALSE	-0.0714816	3.03919	0.583046	0.840116	FALSE	-0.171394	2.33186	0.395165	0.66613	FALSE	-0.222416	3.16667	0.0724381	0.275385	FALSE	-0.150047	2.85781	0.292654	0.629737	FALSE	-0.256891	3.143	0.0761406	0.294482	FALSE	0.0417003	3.418	0.754819	0.903309	FALSE	NA	NA	NA	NA	NA	NA	NA	NA	NA
ATP13A2	-0.0158226	2.88013	0.895202	0.949865	FALSE	0.0703118	3.18179	0.512285	0.791713	FALSE	0.180231	3.00888	0.174638	0.548369	FALSE	-0.0817559	2.4418	0.605949	0.807765	FALSE	-0.210615	2.94604	0.147768	0.391743	FALSE	-0.064881	3.05297	0.647545	0.853612	FALSE	-0.0573041	3.00545	0.694976	0.855015	FALSE	NA	NA	NA	NA	NA	NA	NA	NA	NA	NA	NA	NA	NA	NA
ATP13A3	0.0629119	7.28079	0.682055	0.834326	FALSE	0.038043	8.20963	0.787387	0.921973	FALSE	-0.0571969	8.02399	0.722683	0.905832	FALSE	0.043171	8.15041	0.768215	0.902829	FALSE	0.235458	8.9369	0.125981	0.362173	FALSE	0.123851	7.89799	0.389292	0.700542	FALSE	0.0668151	7.38367	0.626778	0.818421	FALSE	0.222198	7.57456	0.128474	0.41133	FALSE	0.174212	8.33931	0.161339	0.491847	FALSE	0.0690884	7.0827	0.823656	0.923024
ATP1A1	0.176217	6.82268	0.108181	0.317887	FALSE	0.111949	7.12574	0.205555	0.546992	FALSE	0.0853602	7.02356	0.485631	0.789529	FALSE	0.188061	7.14962	0.0812448	0.302599	FALSE	0.319066	7.40617	0.00568238	0.0760443	TRUE	0.312823	6.95991	0.00751808	0.149288	FALSE	0.246286	6.79705	0.0227663	0.170973	FALSE	0.326908	6.8953	0.00137038	0.0497839	TRUE	0.328496	7.17345	0.00262302	0.0977599	TRUE	-0.0249887	6.32328	0.916977	0.964011
ATP1A1-AS1	NA	NA	NA	NA	NA	-0.297043	2.42426	0.0222487	0.230244	FALSE	-0.108795	2.25497	0.484477	0.789529	FALSE	0.080712	2.55555	0.683117	0.856136	FALSE	-0.0885069	2.47748	0.649908	0.824182	FALSE	NA	NA	NA	NA	NA	NA	NA	NA	NA	NA	NA	NA	NA	NA	NA	NA	NA	NA	NA	NA	NA	NA	NA	NA
ATP1B1	-0.321797	7.25274	0.149521	0.378676	FALSE	-0.186171	7.55228	0.410507	0.728627	FALSE	-0.50624	6.86819	0.0679325	0.395459	FALSE	0.0806415	7.2987	0.636577	0.827848	FALSE	-0.259021	6.59724	0.323658	0.585824	FALSE	0.0357283	7.29534	0.85876	0.948534	FALSE	-0.30861	6.81642	0.153176	0.413352	FALSE	-0.361189	7.31958	0.0756919	0.330944	FALSE	-0.249477	6.96119	0.325576	0.642749	FALSE	NA	NA	NA	NA
ATP1B3	-0.159941	8.16203	0.13977	0.366346	FALSE	-0.217633	8.15467	0.021509	0.227575	FALSE	-0.117029	8.08513	0.243703	0.614906	FALSE	-0.163163	8.26503	0.110094	0.350081	FALSE	0.00465987	8.19599	0.955389	0.980301	FALSE	0.0233685	8.16879	0.860019	0.949322	FALSE	-0.145708	7.99746	0.100756	0.334878	FALSE	-0.11129	8.12468	0.189986	0.494515	FALSE	-0.268114	8.55791	0.0134952	0.189683	FALSE	0.0167609	9.23684	0.910325	0.960364
ATP23	0.119844	1.94953	0.604988	0.784739	FALSE	0.0206874	1.94842	0.917141	0.97213	FALSE	0.269686	1.71457	0.347852	0.704594	FALSE	0.424426	2.26253	0.0797453	0.29979	FALSE	NA	NA	NA	NA	NA	NA	NA	NA	NA	NA	NA	NA	NA	NA	NA	NA	NA	NA	NA	NA	NA	NA	NA	NA	NA	NA	NA	NA	NA
ATP2A2	-0.192541	6.03867	0.0990448	0.303217	FALSE	-0.170332	6.74337	0.0668393	0.352186	FALSE	-0.136735	6.46556	0.242878	0.614251	FALSE	-0.1855	6.40814	0.12466	0.374095	FALSE	-0.104417	6.63887	0.249575	0.516819	FALSE	-0.101794	6.47868	0.382526	0.69647	FALSE	-0.177521	6.00078	0.0660777	0.276322	FALSE	-0.0676096	6.41735	0.530969	0.782383	FALSE	-0.101494	6.50791	0.383785	0.693392	FALSE	-0.20851	5.81829	0.282255	0.604115
ATP2B1	0.0733014	8.40028	0.680317	0.832864	FALSE	-0.0402227	8.88188	0.7997	0.928257	FALSE	-0.0188727	9.49531	0.916887	0.977049	FALSE	-0.150437	8.99087	0.369125	0.644859	FALSE	-0.047247	8.61546	0.737042	0.876074	FALSE	-0.280089	8.73999	0.134767	0.465805	FALSE	-0.0909546	8.59347	0.539799	0.761448	FALSE	-0.0596226	8.49217	0.708344	0.877407	FALSE	0.23284	8.68391	0.183371	0.512515	FALSE	-0.309163	8.33096	0.112408	0.410282
ATP2B1-AS1	0.2465	3.37576	0.274384	0.519928	FALSE	-0.0133227	3.26251	0.948248	0.985275	FALSE	-0.0600682	4.13944	0.827196	0.946623	FALSE	0.637207	4.82207	0.0227463	0.164434	FALSE	0.199931	3.42221	0.469738	0.696965	FALSE	0.101008	3.48832	0.650592	0.854271	FALSE	0.129966	3.54981	0.520583	0.746418	FALSE	NA	NA	NA	NA	NA	NA	NA	NA	NA	NA	NA	NA	NA	NA
ATP2B4	0.639179	1.51052	0.0258492	0.159662	FALSE	0.499711	2.38414	0.119934	0.446408	FALSE	NA	NA	NA	NA	NA	0.400968	2.99344	0.279343	0.561691	FALSE	0.713542	3.66995	0.00516858	0.0719502	TRUE	NA	NA	NA	NA	NA	NA	NA	NA	NA	NA	NA	NA	NA	NA	NA	NA	NA	NA	NA	NA	NA	NA	NA	NA
ATP2C1	-0.0909026	6.82168	0.528552	0.731999	FALSE	-0.12265	7.72379	0.305958	0.645112	FALSE	-0.202326	7.63834	0.184381	0.554094	FALSE	-0.132453	7.79017	0.381647	0.653961	FALSE	0.131722	7.40127	0.246375	0.51396	FALSE	-0.0747724	7.23862	0.506242	0.779773	FALSE	-0.0167809	6.81899	0.899923	0.958704	FALSE	-0.0892984	7.19622	0.504806	0.765319	FALSE	-0.00253326	7.11554	0.985878	0.996726	FALSE	0.0704428	6.60986	0.763994	0.89453
ATP5F1A	0.080634	6.35946	0.527734	0.731791	FALSE	-0.0917844	6.29889	0.308801	0.647715	FALSE	0.00753574	6.27431	0.952248	0.988094	FALSE	0.113384	5.83661	0.374138	0.64786	FALSE	-0.101237	6.30228	0.273433	0.539128	FALSE	0.0244997	6.10415	0.830809	0.939118	FALSE	-0.227331	6.32937	0.0584789	0.259084	FALSE	-0.088068	6.3776	0.346074	0.65106	FALSE	-0.0537374	5.96293	0.736555	0.89949	FALSE	-0.0252667	5.79007	0.890371	0.953423
ATP5F1B	0.110078	7.30023	0.429376	0.656791	FALSE	0.00383333	6.92364	0.965713	0.9904	FALSE	0.0668909	6.96407	0.558729	0.828149	FALSE	0.0437003	6.90853	0.725329	0.879579	FALSE	0.0532529	7.13658	0.561072	0.765981	FALSE	0.255019	6.93895	0.0472693	0.32239	FALSE	-0.0169439	7.26138	0.886008	0.954454	FALSE	0.0530603	7.15098	0.593988	0.820325	FALSE	0.0422373	7.04502	0.751278	0.905063	FALSE	-0.00137049	7.18861	0.992631	0.994909
ATP5F1C	0.322219	7.20598	0.038479	0.193394	FALSE	0.0536211	6.82171	0.628311	0.855217	FALSE	0.244896	6.88674	0.0795196	0.424104	FALSE	0.250439	6.77318	0.0661624	0.272428	FALSE	0.102337	6.90425	0.289321	0.554746	FALSE	0.321398	6.90234	0.038568	0.296086	FALSE	0.115155	7.14157	0.367785	0.628235	FALSE	0.231866	7.08323	0.0399581	0.244677	FALSE	0.0357848	6.89747	0.822194	0.933783	FALSE	0.245447	6.84698	0.157304	0.472147
ATP5F1D	0.0457504	7.2177	0.781355	0.888178	FALSE	-0.114327	6.74966	0.427666	0.73792	FALSE	-0.0429802	6.7501	0.799146	0.938791	FALSE	-0.0481621	6.82374	0.76037	0.900154	FALSE	-0.0116578	6.83645	0.930702	0.969897	FALSE	0.00330966	6.90216	0.984661	0.994307	FALSE	-0.0215435	7.16643	0.873807	0.949835	FALSE	-0.0779413	7.02468	0.519613	0.776113	FALSE	-0.0946857	6.69758	0.561138	0.808822	FALSE	0.088266	6.87664	0.58514	0.801806
ATP5F1E	0.670587	10.5525	0.00065223	0.0307305	TRUE	0.444755	10.1539	0.00391812	0.11479	FALSE	0.463873	10.2478	0.0116949	0.218446	FALSE	0.567641	10.3136	0.000151264	0.0157022	TRUE	0.555647	10.3026	0.000121795	0.01055	TRUE	0.456068	10.3736	0.0138429	0.194925	FALSE	0.643895	10.5755	0.000130036	0.0159084	TRUE	0.530943	10.404	0.000265537	0.0251699	TRUE	0.403111	10.4332	0.00993011	0.163885	FALSE	0.632917	10.3997	0.000474396	0.0473447
ATP5IF1	0.314517	6.63357	0.168423	0.402886	FALSE	-0.0197626	6.16929	0.914826	0.971515	FALSE	-0.0460257	6.09916	0.82989	0.946882	FALSE	0.3619	6.37418	0.0821968	0.304968	FALSE	0.121875	5.90698	0.4781	0.703137	FALSE	0.383816	6.41477	0.0921596	0.406401	FALSE	0.153453	6.531	0.367567	0.628219	FALSE	0.129333	6.37167	0.420977	0.702828	FALSE	0.177014	6.18054	0.403883	0.709342	FALSE	NA	NA	NA	NA
ATP5MC1	0.29215	6.59508	0.115229	0.329762	FALSE	0.0456646	6.11152	0.771389	0.917419	FALSE	0.161896	6.0893	0.394773	0.735886	FALSE	0.250234	6.07541	0.144183	0.402645	FALSE	0.287841	6.07046	0.0527037	0.233694	FALSE	0.290265	6.22165	0.139211	0.47161	FALSE	0.216917	6.53236	0.155438	0.415876	FALSE	0.065438	6.30568	0.669677	0.85824	FALSE	0.34173	5.88793	0.0924077	0.382202	FALSE	0.501628	5.95091	0.0221354	0.209074
ATP5MC2	0.290352	8.1796	0.103248	0.309872	FALSE	0.128002	7.78816	0.380581	0.70455	FALSE	0.178243	7.82316	0.325691	0.689874	FALSE	0.226879	7.95829	0.140529	0.397395	FALSE	0.117205	7.73393	0.362158	0.616486	FALSE	0.293396	7.95873	0.0684445	0.361283	FALSE	0.205673	8.13471	0.120269	0.362095	FALSE	0.185256	7.99731	0.145972	0.437296	FALSE	0.0191103	7.81427	0.911656	0.968623	FALSE	0.057499	7.70199	0.756852	0.89073
ATP5MC3	0.318395	8.80523	0.0904394	0.290946	FALSE	0.195959	8.28655	0.211453	0.551904	FALSE	0.195554	8.29298	0.307811	0.674225	FALSE	0.349223	8.30862	0.0319979	0.191064	FALSE	0.163051	8.19061	0.222213	0.487892	FALSE	0.40983	8.4267	0.0534188	0.333151	FALSE	0.279304	8.7598	0.0899734	0.31677	FALSE	0.260626	8.53779	0.0675477	0.31336	FALSE	0.236779	8.48579	0.154353	0.485431	FALSE	0.258367	7.58261	0.151222	0.466686
ATP5MD	0.794678	8.28192	6.86789e-05	0.00985037	TRUE	0.510427	7.81498	0.00119922	0.0793807	TRUE	0.563651	7.92848	0.00224066	0.119628	FALSE	0.691304	8.016	1.22834e-05	0.00423515	TRUE	0.558577	7.92617	8.45466e-05	0.00971198	TRUE	0.530941	8.06945	0.00387706	0.121809	FALSE	0.69871	8.26931	3.18268e-05	0.00770826	TRUE	0.576771	8.09248	7.4958e-05	0.0137836	TRUE	0.453953	8.19638	0.00511246	0.122752	FALSE	0.464118	8.09523	0.00177358	0.0815242
ATP5ME	0.794291	7.48029	0.000554987	0.0287248	TRUE	0.532404	7.05534	0.00511606	0.125211	FALSE	0.573878	7.13399	0.0081425	0.189444	FALSE	0.613553	7.13801	0.000170194	0.0163347	TRUE	0.496897	7.05478	0.00354642	0.0586316	TRUE	0.573124	7.26989	0.00175263	0.093772	TRUE	0.689139	7.48986	0.000762301	0.0351667	TRUE	0.548145	7.30297	0.00125328	0.0466246	TRUE	0.409651	7.14946	0.0561046	0.316675	FALSE	0.450489	7.45908	0.00717434	0.134011
ATP5MF	0.554241	8.11287	0.00643318	0.0839931	TRUE	0.295284	7.61695	0.0669865	0.35238	FALSE	0.351191	7.69707	0.0763926	0.415287	FALSE	0.450769	7.6106	0.0071686	0.0962526	TRUE	0.477662	7.65541	0.00162095	0.0410441	TRUE	0.474216	7.79503	0.0176464	0.214706	FALSE	0.465289	8.08672	0.00788977	0.110065	FALSE	0.360916	7.91418	0.0162372	0.159446	FALSE	0.253943	7.79381	0.133348	0.451788	FALSE	0.485459	7.74794	0.00359938	0.0996061
[truncated: 9,773 more rows]
[truncated: 2 more columns]
